# Supplementary material for: On the Use of t-Distributed Stochastic Neighbor Embedding for Data Visualization and Classification of Individuals with Parkinson's Disease
Source: Comput Math Methods Med. 2018 Nov 4;2018:8019232. doi: 10.1155/2018/8019232 (PMC6247646; doi:10.1155/2018/8019232)
Supplement: Supplementary Materials — The attached supplementary material file includes three tables containing features estimated from signals of the executed tasks. Each table includes features extracted from filtered signals, instantaneous frequency, and instantaneous amplitude, respectively. [file 8019232.f1.zip]

Archive with 3 entries (3 files):
- 8019232.f1/FeatMatrix_FS.xlsx
- 8019232.f1/FeatMatrix_IA.xlsx
- 8019232.f1/FeatMatrix_IF.xlsx
