# Supplementary material for: On the Use of t-Distributed Stochastic Neighbor Embedding for Data Visualization and Classification of Individuals with Parkinson's Disease
Source: Comput Math Methods Med. 2018 Nov 4;2018:8019232. doi: 10.1155/2018/8019232 (PMC6247646; doi:10.1155/2018/8019232)
Supplement: Supplementary Materials — The attached supplementary material file includes three tables containing features estimated from signals of the executed tasks. Each table includes features extracted from filtered signals, instantaneous frequency, and instantaneous amplitude, respectively. [file 8019232.f1.zip › 8019232.f1/FeatMatrix_FS.xlsx]

## Sheet: Planilha1
Subject	Activity	Pathological	DBSuser	Gyro1MAV	Gyro1RMS	Gyro1PEAK	Gyro1MAVSDN	Gyro1MAVSD	Gyro1MAVFDN	Gyro1MAVFD	Gyro1INTERQRANGE	Gyro1RANGE	Gyro1STD	Gyro1VAR	Gyro1APPENTROPY	Gyro1XMAV	Gyro1XRMS	Gyro1XPEAK	Gyro1XMAVSDN	Gyro1XMAVSD	Gyro1XMAVFDN	Gyro1XMAVFD	Gyro1XINTERQRANGE	Gyro1XRANGE	Gyro1XSTD	Gyro1XVAR	Gyro1XAPPENTROPY	Gyro1YMAV	Gyro1YRMS	Gyro1YPEAK	Gyro1YMAVSDN	Gyro1YMAVSD	Gyro1YMAVFDN	Gyro1YMAVFD	Gyro1YINTERQRANGE	Gyro1YRANGE	Gyro1YSTD	Gyro1YVAR	Gyro1YAPPENTROPY	Gyro1ZMAV	Gyro1ZRMS	Gyro1ZPEAK	Gyro1ZMAVSDN	Gyro1ZMAVSD	Gyro1ZMAVFDN	Gyro1ZMAVFD	Gyro1ZINTERQRANGE	Gyro1ZRANGE	Gyro1ZSTD
4	1	1	1	0.0714414	0.087553	0.240604	1.03261	0.090452	7.12168	0.054644	0.127302	0.433149	0.0875951	0.00767291	1.12848	0.160841	0.193904	0.424246	1.10446	0.214383	3.2277	0.121611	0.290481	0.851378	0.194106	0.0376773	0.971207	0.133329	0.161324	0.322732	1.35485	0.218799	4.75905	0.124115	0.240957	0.701037	0.161493	0.0260799	0.911499	0.0574284	0.0705993	0.1972	0.886479	0.0626474	6.7291	0.0336067	0.099029	0.406922	0.0706699
4	2	1	1	0.422121	0.496972	1.53803	0.374581	0.186187	0.401329	0.0991537	0.834289	2.3046	0.497055	0.247063	0.709431	0.250163	0.34815	1.45884	0.876189	0.305298	1.36374	0.165571	0.352875	2.53664	0.348439	0.121409	0.788685	0.646462	0.762807	1.90752	0.283189	0.216251	0.199123	0.116114	1.18465	3.15335	0.763628	0.583128	0.630623	0.573346	0.670174	1.7216	0.219784	0.147478	0.172607	0.0777182	1.07264	3.01561	0.671014
4	3	1	1	1.24097	1.58344	5.67679	0.858001	1.36006	0.306213	0.76942	2.01975	8.19584	1.58515	2.51269	1.0439	2.24765	2.76058	4.89634	0.742234	2.05123	0.141709	1.08229	3.98245	12.6154	2.76359	7.63741	0.817907	0.542847	0.671497	1.60173	0.881096	0.592288	0.696543	0.314751	0.929437	3.651	0.672217	0.451876	0.768775	0.670911	0.854239	1.39189	0.637953	0.545504	0.390129	0.285251	1.058	4.285	0.855085
4	4	1	1	0.431033	0.545501	1.29563	1.35899	0.741539	1.54837	0.461012	0.700925	2.64593	0.545656	0.297741	0.811606	1.13113	1.41292	2.76888	0.965601	1.36592	0.358577	0.717526	1.80666	5.96487	1.41458	2.00104	0.502125	0.367598	0.479722	1.2798	0.910759	0.437434	0.999254	0.230513	0.533452	2.54824	0.480296	0.230685	0.55182	0.0981546	0.122955	0.287257	0.953014	0.117316	4.24318	0.0643	0.175114	0.62067	0.1231
4	1	1	1	0.107718	0.131191	0.362166	1.0595	0.138793	4.79351	0.08226	0.189325	0.647928	0.130999	0.0171607	1.12785	0.199283	0.238541	0.670777	1.15901	0.276632	2.7946	0.159202	0.372937	1.13196	0.238679	0.0569675	1.01101	0.194584	0.239825	0.554847	1.23304	0.295952	2.88164	0.166006	0.330827	1.16536	0.240017	0.0576083	0.902202	0.0793293	0.0938115	0.236461	0.963219	0.0904146	5.52482	0.0486794	0.154648	0.439155	0.0938671
4	2	1	1	0.434075	0.518236	1.47251	0.416145	0.215701	0.435057	0.116885	0.793289	2.50203	0.518331	0.268667	0.74284	0.262616	0.370187	1.70315	0.883443	0.327474	1.30756	0.179663	0.363069	2.9663	0.37068	0.137403	0.71668	0.663859	0.786793	1.9628	0.311423	0.245327	0.208968	0.129679	1.19478	3.45667	0.787762	0.620569	0.630979	0.583781	0.681053	1.74748	0.221053	0.150713	0.170613	0.0793087	1.12504	2.99801	0.681795
4	3	1	1	1.3152	1.66898	6.32211	0.875603	1.46297	0.294736	0.822787	2.22955	8.78004	1.67081	2.79161	1.04801	2.37368	2.92788	5.53249	0.79059	2.31708	0.141522	1.21564	3.9304	13.53	2.93083	8.58976	0.809289	0.611602	0.755523	1.87425	0.891936	0.674588	0.6337	0.362488	1.07794	3.7974	0.756319	0.572018	0.839096	0.653212	0.821563	1.353	0.689088	0.566413	0.438039	0.295958	1.06342	3.61019	0.821975
4	4	1	1	0.2082	0.270055	0.896065	1.23282	0.33323	2.79803	0.204426	0.331502	1.57153	0.270298	0.0730608	0.804975	0.552325	0.722239	1.53602	0.903677	0.653579	0.665246	0.347977	0.797123	3.59635	0.723243	0.523081	0.510515	0.256704	0.326154	0.917995	0.895425	0.292459	1.46747	0.156545	0.418168	1.86041	0.326614	0.106677	0.701684	0.0757278	0.0969859	0.260452	0.930519	0.0903744	5.32794	0.0502574	0.121008	0.602735	0.0971226
4	1	1	1	0.126885	0.152679	0.453208	1.21045	0.184816	4.66223	0.108688	0.235488	0.839351	0.152684	0.0233124	1.07141	0.247055	0.291489	0.675842	1.04138	0.303847	1.96426	0.167221	0.474718	1.53535	0.291774	0.0851318	0.992394	0.219801	0.271726	0.601333	1.16605	0.317138	2.42819	0.179617	0.370679	1.28847	0.271977	0.0739717	0.885202	0.108736	0.130022	0.414608	0.917795	0.119413	3.73967	0.0633061	0.201904	0.637573	0.130109
4	2	1	1	0.381378	0.446139	0.96178	0.344516	0.153859	0.416833	0.0831355	0.721662	1.90937	0.446593	0.199446	0.727425	0.247018	0.316709	1.06697	0.982709	0.311489	1.69033	0.169827	0.422767	2.2275	0.31697	0.10047	0.784124	0.338269	0.410291	1.04784	0.430851	0.176951	0.565871	0.0954481	0.620046	1.95943	0.4107	0.168675	0.749838	0.750271	0.86103	1.78952	0.179541	0.154737	0.107658	0.0799664	1.51567	3.37819	0.861846
4	3	1	1	1.13499	1.45671	5.89317	0.975619	1.4227	0.38522	0.819173	1.85509	8.19847	1.45825	2.1265	1.13621	2.36049	2.81884	4.59933	0.811535	2.29002	0.151302	1.20478	4.39699	12.4746	2.82184	7.96278	0.810326	0.634221	0.784717	2.15419	0.857571	0.673667	0.581862	0.359063	1.11791	4.11579	0.785553	0.617093	0.742337	0.53031	0.657522	1.13841	0.729403	0.480041	0.580698	0.25152	0.912917	3.27224	0.658129
4	4	1	1	0.093972	0.119903	0.46071	0.845873	0.0999489	4.27431	0.0596776	0.150245	0.68573	0.118161	0.0139619	1.02362	0.198493	0.242471	0.545905	1.0117	0.245622	2.25982	0.133199	0.346196	1.23817	0.24278	0.0589423	0.760272	0.180621	0.230537	0.576037	0.90067	0.207891	2.0881	0.111248	0.275984	1.15138	0.230819	0.0532772	0.614393	0.0503499	0.0621076	0.160695	0.957577	0.0595517	8.45843	0.0327137	0.0892161	0.396121	0.0621899
4	1	1	1	0.106303	0.137211	0.456479	1.05687	0.145064	4.7894	0.0902313	0.167402	0.746854	0.137258	0.0188398	1.07875	0.17723	0.216834	0.478764	1.08639	0.235737	2.79695	0.131694	0.300623	1.09108	0.216991	0.0470849	0.957953	0.185362	0.231054	0.534275	1.14393	0.26455	2.80783	0.150172	0.309078	1.07718	0.231265	0.0534833	0.850325	0.1123	0.134066	0.34641	0.885484	0.118834	3.47369	0.0625617	0.214985	0.592082	0.134202
4	2	1	1	0.440656	0.530277	2.09498	0.400938	0.212677	0.4021	0.113141	0.82782	3.11428	0.530449	0.281376	0.712919	0.28802	0.423274	2.42047	0.776298	0.328878	0.996949	0.178931	0.378842	3.46307	0.423649	0.179478	0.807215	0.492704	0.608656	2.0419	0.330998	0.201674	0.289401	0.107436	0.834968	3.39449	0.609291	0.371236	0.740286	0.641946	0.779632	1.9184	0.195634	0.152687	0.129036	0.0786007	1.17067	3.49627	0.780473
4	3	1	1	1.34614	1.62227	5.09739	0.842171	1.3675	0.280424	0.739384	2.47081	7.77169	1.62378	2.63666	0.944445	2.34357	2.85431	5.49588	0.63269	1.80783	0.116951	0.954857	4.08841	12.6861	2.85738	8.16461	0.848538	0.418082	0.504451	1.17258	0.839756	0.424045	0.902148	0.230036	0.739345	2.37733	0.504962	0.254987	0.869056	0.632843	0.79222	1.52244	0.543855	0.431194	0.361088	0.226982	1.0912	4.09374	0.792847
4	4	1	1	0.154928	0.190301	0.475775	1.38358	0.263283	4.45178	0.161203	0.27529	0.934086	0.190291	0.0362108	0.828487	0.466275	0.547929	1.14376	0.983877	0.539828	0.952817	0.286839	0.890581	2.42385	0.548674	0.301043	0.562949	0.138363	0.177289	0.452256	0.87205	0.154819	2.6461	0.0834014	0.227457	1.03249	0.177535	0.0315186	0.722535	0.0762787	0.089251	0.233586	0.990418	0.088515	5.77276	0.0461085	0.149242	0.423886	0.0893714
4	1	1	1	0.117736	0.154554	0.515541	1.11831	0.172722	4.4356	0.105809	0.181808	0.896696	0.154449	0.0238544	1.07666	0.223512	0.277605	0.505508	1.09369	0.303974	2.17009	0.167634	0.373768	1.28689	0.277934	0.0772475	0.929499	0.238274	0.29362	0.60186	1.14862	0.337609	2.2009	0.190141	0.391493	1.24143	0.293926	0.0863926	0.801453	0.151385	0.178954	0.411656	0.89265	0.159914	2.62107	0.0841181	0.296114	0.754191	0.179145
4	2	1	1	0.412634	0.50005	1.38318	0.396836	0.198663	0.423921	0.106242	0.748002	2.44509	0.500618	0.250618	0.749469	0.30049	0.404252	1.5896	0.85332	0.345228	1.14996	0.188221	0.445643	2.5915	0.40457	0.163677	0.767144	0.586595	0.688954	1.52959	0.332379	0.229266	0.257296	0.122418	1.11106	2.7558	0.689774	0.475788	0.706854	0.664871	0.77931	1.83816	0.21701	0.1693	0.144875	0.0881752	1.21109	3.18154	0.780148
4	3	1	1	1.25832	1.57092	5.58675	0.906702	1.42541	0.327471	0.809329	2.07878	8.16007	1.57209	2.47146	0.982309	2.51157	3.00837	5.33634	0.77153	2.32355	0.134872	1.22326	4.36634	12.9562	3.01161	9.06981	0.757095	0.665037	0.813344	2.15106	0.888524	0.723589	0.577617	0.383076	1.18564	4.16645	0.814372	0.663202	0.711446	0.578366	0.734331	1.86834	0.707521	0.52014	0.505903	0.27342	0.909473	4.8225	0.735159
4	4	1	1	0.101993	0.13128	0.421695	1.04376	0.135469	4.93302	0.0830985	0.17545	0.70702	0.12979	0.0168454	0.955093	0.269111	0.315548	0.733541	1.06162	0.33535	1.88177	0.187771	0.494735	1.32513	0.315886	0.0997842	0.860206	0.310834	0.378188	0.867449	0.992408	0.375499	1.40648	0.201359	0.548677	1.73174	0.378372	0.143165	0.588359	0.0999958	0.118813	0.259889	0.995221	0.118315	4.46467	0.0631	0.186699	0.513758	0.118883
5	1	1	1	0.106968	0.13866	0.560114	0.768381	0.10647	3.21131	0.0616567	0.164508	1.05522	0.138564	0.0191999	1.05791	0.118374	0.159419	0.566053	0.942461	0.150134	3.29648	0.0836538	0.169618	1.11921	0.159301	0.0253767	0.947567	0.174346	0.239175	0.848731	0.915234	0.219033	2.26838	0.129918	0.246558	1.79708	0.239319	0.0572736	0.931744	0.093651	0.11722	0.343178	0.832581	0.0976609	3.89256	0.053558	0.157006	0.723966	0.117299
5	2	1	1	0.221573	0.283895	1.22221	0.356086	0.101024	0.650673	0.0523721	0.384892	1.8605	0.283706	0.0804891	0.632382	0.19078	0.291369	1.57475	0.408295	0.119006	0.749268	0.0636538	0.260972	2.37026	0.29147	0.0849547	0.724321	0.162636	0.200866	0.55999	0.397473	0.0799208	1.03247	0.0417429	0.283128	1.19572	0.201072	0.04043	0.695422	0.411946	0.490221	1.09893	0.206128	0.101133	0.212313	0.0511075	0.80716	2.20763	0.49063
5	3	1	1	0.699525	0.877601	2.6948	0.365297	0.320962	0.214433	0.165541	1.20538	4.50965	0.878631	0.771993	0.660583	1.19555	1.4977	3.74313	0.221843	0.332645	0.0760033	0.170885	1.9708	7.44834	1.49946	2.24839	0.55909	0.309997	0.382517	0.800184	0.322206	0.123391	0.450393	0.0660523	0.531065	1.94171	0.382955	0.146655	0.726505	0.517705	0.654102	2.14333	0.208835	0.13672	0.163681	0.0701552	0.842441	3.94162	0.654682
5	4	1	1	0.0190432	0.0259655	0.0596197	0.535857	0.0139326	11.7638	0.00795271	0.0274774	0.161612	0.0260006	0.000676032	0.98234	0.020887	0.0254387	0.0952423	0.912452	0.0232164	20.2739	0.0131253	0.0388694	0.158403	0.025444	0.000647398	0.997678	0.0118898	0.015351	0.0507528	0.943565	0.0143375	35.0016	0.00808148	0.0185475	0.0829306	0.015195	0.000230889	0.883116	0.0240456	0.028798	0.0547738	0.743582	0.0209175	13.9546	0.0110428	0.0448181	0.125091	0.0281307
5	1	1	1	0.205024	0.285049	1.85202	0.614083	0.1752	1.20387	0.0979921	0.29668	2.36221	0.285303	0.0813978	0.790303	0.126622	0.162179	0.506938	0.87998	0.14269	3.12548	0.082178	0.20627	1.05151	0.162151	0.0262929	1.01438	0.231858	0.353751	1.09059	0.616653	0.218271	0.980118	0.122798	0.292708	3.06066	0.353962	0.125289	0.799258	0.163615	0.218737	1.03749	0.517855	0.113248	1.27243	0.0608518	0.256086	1.53577	0.218686
5	2	1	1	0.419245	0.501123	1.94377	0.380391	0.190489	0.391122	0.0980828	0.777308	2.83824	0.500772	0.250773	0.563242	0.378525	0.528242	2.33072	0.45214	0.238814	0.463406	0.129281	0.540564	4.01517	0.528186	0.27898	0.793275	0.194987	0.231958	0.672634	0.394857	0.0916734	0.905539	0.0488107	0.364086	1.1249	0.232169	0.0539023	0.747233	0.795905	0.901839	1.76962	0.207912	0.187683	0.11659	0.0950054	1.66012	3.30668	0.902702
5	3	1	1	0.777338	0.882625	2.1795	0.370557	0.32743	0.217809	0.17006	1.51224	3.67481	0.883616	0.780777	0.639333	1.32484	1.55765	2.9938	0.211759	0.330239	0.0701883	0.170701	2.98088	5.89336	1.5595	2.43205	0.513419	0.415348	0.500672	1.23231	0.241185	0.120905	0.250966	0.0630669	0.753999	2.37069	0.501295	0.251296	0.570223	0.551698	0.640479	1.19345	0.197867	0.126844	0.15944	0.065523	1.21401	2.46773	0.641058
5	4	1	1	0.0895221	0.139164	0.101076	0.112928	0.0150953	0.476405	0.00851251	0.103609	0.539188	0.133672	0.0178682	0.315084	0.0799764	0.118574	0.385127	0.25315	0.0273009	1.41658	0.0164755	0.150906	0.458797	0.107845	0.0116305	0.545732	0.0337625	0.0476827	0.143918	0.32487	0.0141792	4.22787	0.00805394	0.0681925	0.179952	0.0436459	0.00190496	0.531988	0.023446	0.0321332	0.109179	0.59206	0.0185315	10.0499	0.00984585	0.0366767	0.15262	0.0313001
5	1	1	1	0.113353	0.142681	0.447702	0.744427	0.105885	2.86886	0.0580413	0.192399	0.816272	0.142237	0.0202315	0.94553	0.105129	0.132428	0.442534	0.883328	0.116737	3.78651	0.066132	0.166983	0.767609	0.132156	0.0174652	0.880658	0.276983	0.31654	0.795652	0.455811	0.144472	0.796392	0.0800069	0.565518	1.62822	0.316957	0.100462	0.834999	0.185395	0.218127	0.446327	0.433899	0.094771	1.07725	0.0513915	0.335228	1.00101	0.218417
5	2	1	1	0.385759	0.460583	1.4547	0.417267	0.192462	0.465199	0.0989691	0.720277	2.40853	0.461244	0.212746	0.635517	0.493171	0.597691	1.12692	0.398443	0.238366	0.359965	0.128829	0.902055	2.72011	0.598243	0.357894	0.800288	0.112432	0.147219	0.370116	0.550556	0.0811362	2.02358	0.0439488	0.181453	0.885182	0.147371	0.0217183	0.779037	0.860645	0.960695	2.12156	0.197288	0.189811	0.103313	0.0956305	1.85256	3.68935	0.962101
5	3	1	1	1.08341	1.24582	2.76032	0.370776	0.461939	0.155456	0.241297	2.00796	4.76328	1.24587	1.55219	0.646684	1.87253	2.19537	3.91125	0.21321	0.468696	0.0505597	0.244328	3.72654	8.54473	2.19829	4.83246	0.532918	0.427468	0.521556	1.06348	0.255652	0.133502	0.259058	0.0706437	0.782509	2.31304	0.522202	0.272694	0.612579	0.701855	0.828466	1.64132	0.200259	0.166105	0.124967	0.0859753	1.36962	3.51418	0.829449
5	4	1	1	0.0584409	0.116387	0.103106	0.115823	0.0131944	0.588066	0.00763158	0.049615	0.750716	0.113918	0.0129774	0.281148	0.0337103	0.0636125	0.471078	0.407972	0.0248826	3.92508	0.0146009	0.0315371	0.711215	0.060991	0.00371991	0.745017	0.0163423	0.0256435	0.101024	0.384215	0.00960508	9.00069	0.00562507	0.0179226	0.210495	0.0249992	0.00062496	0.793311	0.0172081	0.0268263	0.140745	0.357076	0.00942336	7.75847	0.00540339	0.0195683	0.195208	0.0263904
5	1	1	1	0.10059	0.125101	0.41689	0.744032	0.0926116	3.49507	0.0541507	0.156816	0.706052	0.124473	0.0154935	0.973448	0.0997021	0.13043	0.43661	0.868289	0.113391	3.67511	0.0626755	0.148634	0.803359	0.130591	0.0170541	0.894625	0.170233	0.209952	0.656481	0.886891	0.186221	2.45697	0.108322	0.281065	1.18436	0.20997	0.0440876	0.932409	0.0796126	0.102651	0.295329	0.708728	0.0727054	3.84654	0.0404804	0.126136	0.628433	0.102586
5	2	1	1	0.321686	0.381783	0.921958	0.386235	0.147613	0.52149	0.0761717	0.629397	1.72499	0.382185	0.146065	0.625753	0.273925	0.353842	0.737677	0.51246	0.181513	0.789148	0.0990047	0.423307	1.96626	0.3542	0.125458	0.870445	0.104109	0.133129	0.332233	0.45305	0.0603431	1.82591	0.0323924	0.181113	0.781007	0.133193	0.0177404	0.789019	0.710981	0.804074	1.45624	0.188029	0.151344	0.118074	0.0764949	1.49687	2.85299	0.804896
5	3	1	1	0.934594	1.06004	2.64084	0.377474	0.400513	0.184637	0.207864	1.89006	4.64741	1.06103	1.12579	0.668404	1.58748	1.87272	3.53604	0.213135	0.399383	0.0590423	0.207317	3.38257	7.8442	1.87385	3.51132	0.552856	0.538597	0.645803	1.12978	0.208675	0.134846	0.167748	0.0700473	0.955793	2.60096	0.6462	0.417575	0.548036	0.526549	0.609081	0.888669	0.200263	0.122082	0.169535	0.0630032	1.06686	2.29952	0.609609
5	4	1	1	0.0782299	0.132594	0.175793	0.118001	0.01547	0.514561	0.00884389	0.079881	0.738089	0.1311	0.0171872	0.387377	0.0330069	0.0490657	0.173304	0.480103	0.0227759	6.03396	0.0135796	0.0395849	0.240686	0.0474397	0.00225052	0.948577	0.0105508	0.0165307	0.0829944	0.766451	0.0125929	26.8233	0.00724093	0.0138768	0.132847	0.0164301	0.000269949	0.968879	0.0211652	0.0329048	0.277484	0.247645	0.00812181	4.2165	0.0045352	0.0267499	0.347446	0.0327961
5	1	1	1	0.111304	0.141861	0.425366	0.61979	0.0875046	2.45061	0.048848	0.176861	0.732132	0.141184	0.019933	0.966752	0.0967536	0.135753	0.602256	0.906049	0.123136	3.8302	0.0707441	0.135561	1.05541	0.135905	0.0184701	0.896405	0.152012	0.193944	0.712668	0.711004	0.138035	2.02463	0.0763097	0.25013	1.33826	0.194141	0.0376907	0.872165	0.105838	0.132485	0.243421	0.623351	0.0826235	2.67743	0.0470393	0.180585	0.718756	0.132547
5	2	1	1	0.41547	0.485782	1.10591	0.405322	0.196937	0.426444	0.100674	0.776996	2.16076	0.485878	0.236078	0.568641	0.432836	0.564893	1.4338	0.391856	0.221321	0.370621	0.118229	0.701385	3.32898	0.564802	0.319002	0.76047	0.153212	0.196264	0.605035	0.429534	0.0840577	1.15796	0.0443459	0.244557	1.42362	0.195695	0.0382967	0.723637	0.868359	0.964673	1.8716	0.196417	0.189657	0.102659	0.0957149	1.8582	3.44911	0.965585
5	3	1	1	1.03926	1.17729	2.31915	0.395066	0.465513	0.172665	0.239733	2.14826	4.4592	1.17832	1.38843	0.636524	1.85634	2.16788	4.37111	0.212092	0.460134	0.050022	0.235442	3.77314	8.69817	2.16951	4.70676	0.536672	0.619501	0.739427	1.81636	0.231195	0.171083	0.162209	0.0888246	1.20269	3.34181	0.739996	0.547594	0.583168	0.520541	0.619615	0.971446	0.227616	0.141006	0.187453	0.0719379	1.02033	2.68668	0.619488
5	4	1	1	0.0600359	0.108271	0.750424	0.207873	0.0224946	1.05498	0.0123539	0.067346	1.04447	0.108213	0.0117101	0.478357	0.0390989	0.0726565	0.36364	0.453809	0.0325529	3.73944	0.0192415	0.0326112	0.586005	0.0717326	0.00514556	0.695392	0.0219516	0.0404402	0.164375	0.310602	0.0125306	4.2698	0.00694932	0.0181608	0.383471	0.0403429	0.00162755	0.594572	0.0612983	0.12003	0.825605	0.159257	0.0191324	0.705916	0.0101881	0.0537706	1.20677	0.120135
6	1	1	1	0.0667751	0.0999123	0.560829	0.664677	0.0664665	3.75802	0.0375788	0.0908639	0.814629	0.0999982	0.00999964	0.885841	0.08519	0.119437	0.713721	0.771475	0.0922302	3.62897	0.0518664	0.128097	1.27066	0.11955	0.0142923	0.986907	0.0740472	0.0998067	0.296635	0.493788	0.0493262	2.69741	0.0269167	0.107646	0.647901	0.0998935	0.00997871	0.911289	0.0806094	0.114738	0.589894	0.78379	0.089982	3.84324	0.0506535	0.110467	1.03395	0.114804
6	2	1	1	0.241731	0.279096	0.557784	0.383388	0.10712	0.715267	0.055838	0.460891	1.16608	0.279403	0.0780661	0.750635	0.336552	0.402833	0.944445	0.432132	0.174269	0.57817	0.0940294	0.60484	1.77938	0.403278	0.162633	0.806962	0.456336	0.516369	0.900363	0.220033	0.113738	0.219314	0.0586012	0.94264	1.97595	0.516915	0.267201	0.555613	0.181034	0.216898	0.52015	0.272144	0.0590787	0.65856	0.0310357	0.324895	1.04884	0.217087
6	3	1	1	0.202688	0.271062	1.10859	0.713183	0.193509	1.45377	0.107027	0.297614	1.58572	0.271331	0.0736207	0.978318	0.291965	0.404728	1.47172	0.588819	0.238511	0.780615	0.128083	0.382654	2.99702	0.405067	0.164079	0.856338	0.127411	0.176455	0.786655	0.590039	0.104216	1.81095	0.0564958	0.176706	1.38704	0.176626	0.0311968	0.871391	0.0800628	0.10198	0.248861	0.812315	0.0829263	4.3743	0.0455874	0.128441	0.595833	0.102086
6	4	1	1	0.0163945	0.0209755	0.0672902	0.926033	0.0194472	25.479	0.0112368	0.0261321	0.125348	0.0210005	0.000441021	0.97789	0.0262339	0.0322948	0.0914934	1.15797	0.037373	20.4793	0.0213323	0.0458102	0.175774	0.0322746	0.00104165	0.911615	0.0137099	0.0177581	0.0634035	0.943509	0.016743	29.8416	0.00939715	0.0206555	0.120385	0.0177454	0.000314901	0.918247	0.0168601	0.020762	0.0695748	0.979261	0.0203127	26.4887	0.0113972	0.0298482	0.113314	0.0207429
6	1	1	1	0.13775	0.188592	1.05608	0.828409	0.15631	2.49059	0.0886719	0.208775	1.40665	0.188687	0.0356027	0.914935	0.156045	0.216322	0.730299	0.894182	0.193617	2.35726	0.11052	0.21273	1.66599	0.216529	0.0468849	0.856015	0.152525	0.194965	0.57793	0.651822	0.127194	1.82796	0.0696054	0.244034	1.29238	0.195136	0.0380782	0.814722	0.184453	0.257923	1.36788	0.905043	0.233671	1.98122	0.13207	0.271883	2.14105	0.258187
6	2	1	1	0.297768	0.354287	0.726372	0.450366	0.159714	0.683534	0.0859636	0.541021	1.6751	0.354631	0.125763	0.818807	0.503936	0.58572	1.40654	0.443103	0.259798	0.41554	0.142848	0.928777	2.87924	0.586316	0.343766	0.810291	0.653705	0.735714	1.46819	0.242138	0.178258	0.172953	0.0937343	1.36032	2.68287	0.736183	0.541965	0.574016	0.193667	0.267922	0.720401	0.375115	0.100604	0.75153	0.0540562	0.279977	1.54075	0.268194
6	3	1	1	0.437911	0.584311	2.34977	0.618284	0.361626	0.584352	0.199902	0.63464	3.34685	0.584886	0.342091	0.885632	0.618642	0.849724	2.90716	0.440977	0.374727	0.28389	0.204997	0.810984	5.97814	0.849766	0.722102	0.810853	0.317266	0.437423	1.49152	0.411034	0.17985	0.508883	0.0974278	0.440944	2.81719	0.437555	0.191454	0.791669	0.168519	0.22012	0.867141	0.607583	0.133689	1.52064	0.0736215	0.270161	1.5042	0.220034
6	4	1	1	0.0212001	0.0277966	0.129276	0.814223	0.022654	16.5849	0.0128385	0.0333147	0.211011	0.0278228	0.000774108	1.12195	0.0289906	0.0368006	0.125262	0.982477	0.0361717	14.8062	0.0200696	0.0496992	0.238745	0.0368169	0.00135548	1.00184	0.0120084	0.0168864	0.0606088	0.797574	0.0134637	26.3012	0.00749487	0.0160106	0.143151	0.0168808	0.000284963	0.964816	0.0173566	0.0210144	0.0597543	0.99324	0.02089	26.4309	0.0116918	0.0304224	0.119645	0.0210322
6	1	1	1	0.136318	0.184153	0.919968	0.700011	0.129036	2.17646	0.0739548	0.217986	1.23895	0.184335	0.0339793	1.02712	0.160513	0.215924	0.968184	0.832274	0.179845	2.15604	0.100675	0.234561	1.67323	0.216089	0.0466944	1.0038	0.118622	0.162485	0.510948	0.704158	0.114529	2.39419	0.0633356	0.167153	1.07521	0.162647	0.0264539	0.882545	0.153129	0.221968	1.15852	0.912342	0.202714	2.31787	0.11443	0.214929	1.95873	0.222191
6	2	1	1	0.347051	0.403656	0.951779	0.444457	0.179437	0.583903	0.0951711	0.657917	1.90839	0.403722	0.162991	0.788492	0.564748	0.653486	1.61875	0.442124	0.289166	0.368754	0.15774	1.13299	2.84324	0.654038	0.427766	0.790745	0.69495	0.792812	1.56107	0.243252	0.193027	0.159985	0.10074	1.38001	2.8794	0.793527	0.629684	0.553568	0.1377	0.176106	0.444938	0.676032	0.119176	2.11767	0.0658109	0.234696	1.07597	0.176287
6	3	1	1	0.377908	0.504827	2.69855	0.695001	0.351223	0.761826	0.194559	0.608833	3.65581	0.505357	0.255385	1.00044	0.635773	0.817643	3.78592	0.456067	0.372942	0.306202	0.204754	1.00267	5.97137	0.817734	0.668689	0.861323	0.324858	0.4126	1.12132	0.424399	0.175216	0.555975	0.094766	0.52012	2.60334	0.412856	0.17045	0.826536	0.12138	0.150337	0.531463	0.65381	0.0983773	2.39346	0.0541893	0.209396	0.951559	0.150468
6	4	1	1	0.0203276	0.0259351	0.0996759	0.916236	0.0233526	20.5495	0.0133492	0.0357661	0.160177	0.0254875	0.000649615	1.09243	0.0294717	0.0359428	0.103211	1.12313	0.0404084	17.7712	0.0230036	0.0542183	0.205405	0.0359783	0.00129444	0.99342	0.016874	0.021724	0.0784947	0.928919	0.0202006	23.5732	0.0111479	0.0262003	0.13902	0.0217464	0.000472906	0.970677	0.0164772	0.0206026	0.0518093	1.06089	0.0218215	29.1031	0.012313	0.0280926	0.122354	0.020569
6	1	1	1	0.185902	0.260887	1.77766	0.866051	0.226187	1.91606	0.130695	0.273861	2.29147	0.26117	0.06821	1.06247	0.191896	0.261223	1.12122	1.09285	0.285759	2.4365	0.166589	0.294596	2.08664	0.261481	0.0683723	0.971125	0.198688	0.262793	0.764902	0.87018	0.228941	1.85179	0.12818	0.320496	1.96439	0.263096	0.0692196	1.02543	0.261188	0.355863	1.80195	1.03971	0.370429	1.63859	0.207996	0.403747	2.92324	0.356281
6	2	1	1	0.386143	0.451686	1.17266	0.459816	0.207838	0.539384	0.110199	0.721886	2.26141	0.452002	0.204306	0.808388	0.642209	0.73621	1.74454	0.473178	0.348695	0.354231	0.192366	1.2085	3.09738	0.736921	0.543053	0.872048	0.822049	0.925002	2.24028	0.255338	0.236407	0.14355	0.123053	1.625	3.7134	0.925857	0.857211	0.521921	0.231805	0.313324	0.701261	0.436711	0.136956	0.749913	0.0737542	0.315527	1.67753	0.313608
6	3	1	1	0.634356	0.812464	3.60803	0.620512	0.504683	0.416521	0.275534	1.00154	5.08817	0.813334	0.661511	0.896779	1.02153	1.28446	4.12746	0.399399	0.513564	0.166253	0.274883	1.64152	8.57289	1.28584	1.6534	0.741614	0.48364	0.618767	2.21221	0.380667	0.235797	0.327101	0.125507	0.77036	3.95075	0.619433	0.383697	0.731949	0.185294	0.227665	0.857598	0.582623	0.132787	1.41411	0.0734549	0.320422	1.58596	0.227913
6	4	1	1	0.0411148	0.060067	0.317038	0.538475	0.0318985	5.4381	0.0190835	0.0587511	0.419897	0.0592387	0.00350922	0.882882	0.0439075	0.0704598	0.34303	0.794526	0.0559977	6.57163	0.0326436	0.0497936	0.65048	0.0704794	0.00496735	0.827734	0.0292271	0.0498731	0.192893	0.548849	0.0273954	6.15387	0.015332	0.0249712	0.397914	0.0499143	0.00249144	0.676837	0.0317324	0.0591996	0.225963	0.717649	0.0425382	6.90993	0.0242777	0.0277682	0.564288	0.0592743
6	1	1	1	0.225269	0.280573	0.912561	1.06081	0.297719	2.1652	0.170546	0.389809	1.43849	0.280654	0.0787667	1.05252	0.194759	0.249718	0.71317	1.09058	0.272602	2.53472	0.158371	0.305195	1.56643	0.249961	0.0624805	0.917157	0.262453	0.329837	0.878151	0.879472	0.2904	1.48234	0.161621	0.432316	1.84414	0.330198	0.109031	1.01921	0.342034	0.442346	1.28254	0.986886	0.43702	1.25356	0.245818	0.52797	2.48271	0.442828
6	2	1	1	0.387942	0.461533	1.69191	0.471646	0.217556	0.549594	0.116937	0.710276	2.64947	0.46127	0.21277	0.819225	0.634806	0.72961	1.68763	0.408444	0.298304	0.305191	0.162789	1.26504	3.00811	0.730342	0.5334	0.810634	0.75386	0.853455	2.56817	0.270931	0.231462	0.165295	0.120642	1.56308	4.00164	0.85432	0.729862	0.550273	0.192812	0.258352	0.662512	0.534785	0.13826	1.12957	0.0755003	0.259906	1.5513	0.258534
6	3	1	1	0.691481	0.875988	3.24695	0.595923	0.522334	0.363028	0.278904	1.11865	4.71058	0.876512	0.768273	0.846393	1.06758	1.37771	4.59266	0.382113	0.527007	0.146742	0.279128	1.59678	8.05244	1.37919	1.90217	0.738459	0.418085	0.563236	1.3797	0.359244	0.202548	0.333783	0.106106	0.595122	3.33228	0.563817	0.31789	0.633579	0.264787	0.337406	0.8009	0.496495	0.1677	0.804829	0.0918209	0.427491	1.97936	0.337768
6	4	1	1	0.0232334	0.0370193	0.176873	0.495232	0.0183493	7.83942	0.0107623	0.0284775	0.340815	0.0370519	0.00137284	1.00133	0.0326223	0.0479672	0.173583	0.749717	0.0356021	9.11839	0.0205624	0.0472373	0.406126	0.0474874	0.00225505	1.02049	0.0153818	0.0218169	0.122232	0.824381	0.0179947	21.0081	0.0100096	0.0214041	0.192332	0.0218281	0.000476465	0.978113	0.0158278	0.020397	0.0794871	0.97072	0.0195873	27.5625	0.0112223	0.0258595	0.130557	0.0201781
7	1	1	1	0.327518	0.435559	2.10036	0.946518	0.412671	1.26195	0.239878	0.517304	3.15744	0.435989	0.190086	1.0321	0.616093	0.824206	2.61832	0.919438	0.758594	0.610536	0.415609	0.823014	4.86453	0.825062	0.680728	0.744499	0.488754	0.622636	1.51153	0.870226	0.542319	0.769378	0.298803	0.801526	3.55912	0.623193	0.388369	0.919064	0.624739	0.833714	2.23225	0.814874	0.680086	0.513172	0.357446	0.887175	4.40339	0.83459
7	2	1	1	0.512288	0.655491	2.29981	0.675461	0.442779	0.577555	0.24818	0.857127	3.77127	0.655521	0.429708	0.924493	0.804387	1.08014	3.16309	0.782246	0.845912	0.38782	0.453517	1.17135	6.55223	1.08139	1.1694	0.760838	0.39457	0.537267	1.67141	0.796732	0.428581	0.793914	0.229729	0.574412	3.5267	0.537924	0.289362	0.736469	0.653985	0.754158	1.37507	0.213202	0.160991	0.151001	0.0860999	1.32742	3.06622	0.755113
7	3	1	1	0.773973	1.01063	3.44618	0.699717	0.707685	0.391425	0.400391	1.09173	5.01329	1.01139	1.02291	0.972985	1.34001	1.75904	4.97427	0.478166	0.842283	0.148051	0.459378	2.01699	10.2372	1.76149	3.10283	0.771321	0.612763	0.834311	2.64349	0.876908	0.732588	0.558946	0.390104	0.896296	5.58812	0.835421	0.697929	0.61788	0.35478	0.454211	1.03948	0.911618	0.414515	1.07138	0.221512	0.60955	2.30355	0.454702
7	4	1	1	0.740477	0.908644	2.6555	1.01965	0.927722	0.664091	0.549739	1.2692	4.58972	0.909839	0.827807	0.933868	1.92002	2.39963	5.77935	0.945204	2.27134	0.209534	1.20995	3.0746	11.5614	2.40302	5.77448	0.659234	1.45415	1.7541	4.45389	0.915255	1.60773	0.277487	0.856217	2.71076	8.50859	1.75659	3.08561	0.706091	0.747372	0.964609	3.10197	0.898148	0.867597	0.494216	0.461166	1.19175	5.38203	0.965984
7	1	1	1	0.416001	0.520395	1.56844	1.11903	0.582786	1.27029	0.344538	0.694914	2.6607	0.520796	0.271228	1.0964	0.91594	1.12722	2.68924	0.973884	1.09881	0.465458	0.592536	1.64211	5.79423	1.12828	1.27302	0.887362	0.647362	0.827596	2.78828	0.874862	0.724534	0.576517	0.395413	1.01338	5.3692	0.82817	0.685865	0.983606	0.704594	0.929112	2.49598	0.849255	0.789781	0.479657	0.414828	0.959111	5.28243	0.929969
7	2	1	1	0.676697	0.858197	3.29182	0.630917	0.542084	0.429192	0.316841	1.11545	5.03295	0.859201	0.738226	0.961489	1.09396	1.51219	5.23046	0.759398	1.1497	0.267864	0.613966	1.49475	10.9835	1.51396	2.29208	0.666438	0.530175	0.708014	2.82372	0.820296	0.58147	0.617655	0.310355	0.797867	5.10311	0.708854	0.502474	0.665002	0.642022	0.768608	1.84212	0.403943	0.310813	0.280113	0.165841	1.24138	3.49774	0.769448
7	3	1	1	1.08442	1.3002	3.94646	0.541033	0.703442	0.230916	0.390359	2.05884	5.82221	1.30018	1.69048	0.927073	1.86722	2.35004	5.5165	0.344194	0.80957	0.0796644	0.440724	3.34349	11.6306	2.35208	5.53226	0.785822	0.592685	0.797146	2.36667	0.836748	0.667735	0.563222	0.358673	0.863353	4.46335	0.798012	0.636823	0.623266	0.360107	0.489705	1.66733	0.738242	0.361913	0.805118	0.193496	0.530216	3.16569	0.490237
7	4	1	1	0.474504	0.659901	2.78806	1.01642	0.671111	0.909987	0.396716	0.598015	4.78313	0.660271	0.435958	1.04054	1.17155	1.61151	4.62921	0.871861	1.4058	0.291099	0.756824	1.47932	9.56112	1.61241	2.59988	0.787892	0.961762	1.31632	3.62012	0.810078	1.06693	0.32811	0.569167	1.32182	8.40101	1.31707	1.73468	0.776769	0.493677	0.710249	2.83238	0.795537	0.565355	0.597575	0.301797	0.570047	5.34035	0.710659
7	1	1	1	0.362252	0.484557	1.92391	0.914654	0.443659	1.08333	0.254884	0.507831	2.70294	0.485056	0.23528	1.07049	0.334579	0.438864	1.37634	1.04974	0.461163	1.35842	0.262167	0.514892	2.91083	0.43931	0.192993	0.960726	0.656018	0.842569	1.72046	0.84636	0.713847	0.53675	0.381832	1.00753	4.54622	0.843432	0.711378	0.845363	0.32729	0.399319	1.28295	0.934095	0.373378	1.23311	0.197023	0.61131	2.17663	0.399722
7	2	1	1	0.493638	0.622395	2.1326	0.592539	0.36798	0.536613	0.206954	0.784781	3.40475	0.621022	0.385668	0.94741	0.788567	1.00892	3.11419	0.650821	0.657302	0.351143	0.358173	1.27741	5.51567	1.00996	1.02002	0.855558	0.324573	0.414414	1.20611	0.764387	0.317136	0.992004	0.170757	0.513776	2.36609	0.414889	0.172133	0.79407	0.627059	0.729559	1.41624	0.23513	0.171707	0.1715	0.0914576	1.27086	3.07454	0.730261
7	3	1	1	1.37537	1.61071	4.38481	0.562167	0.906486	0.192142	0.499589	2.44207	6.50033	1.61248	2.6001	0.859679	1.91921	2.55671	5.6281	0.414699	1.06154	0.0873827	0.572572	2.65807	12.1908	2.55978	6.55247	0.774512	0.612622	0.833902	2.98317	0.805226	0.672263	0.513979	0.358252	0.884076	6.25806	0.834875	0.697017	0.685664	0.33189	0.478389	1.91404	0.66476	0.318366	0.744492	0.170759	0.446647	3.78793	0.478918
7	4	1	1	0.846221	1.02929	2.58259	1.12112	1.15519	0.647652	0.687612	1.5384	5.38487	1.03039	1.0617	1.04843	1.79394	2.2116	5.74509	1.00119	2.21641	0.241954	1.18576	3.02906	10.7306	2.21376	4.90075	0.701833	1.37819	1.63393	4.00225	0.907923	1.48509	0.292068	0.781428	2.64911	7.54175	1.6357	2.6755	0.76341	0.712347	0.875213	2.26529	0.975419	0.8546	0.592282	0.454644	1.27786	4.43966	0.876136
7	1	1	1	0.366345	0.454524	1.86014	0.870117	0.395905	1.08509	0.224643	0.606383	2.59124	0.455002	0.207026	1.05056	0.443928	0.587055	1.67357	0.944683	0.555155	0.878202	0.303285	0.62676	3.51436	0.587663	0.345348	0.835733	0.475287	0.644782	2.12966	0.803447	0.51859	0.682954	0.284527	0.652336	4.14347	0.645456	0.416613	0.911687	0.238375	0.310017	1.29339	0.86401	0.26813	1.48515	0.143029	0.371432	2.00191	0.310332
7	2	1	1	0.567445	0.687359	2.02568	0.521685	0.358965	0.417379	0.197614	0.999951	3.50568	0.688088	0.473465	0.924732	0.894744	1.15862	3.14017	0.59561	0.690818	0.276997	0.372631	1.38754	6.35953	1.15985	1.34525	0.761137	0.328353	0.444649	1.85628	0.680757	0.30302	0.832539	0.164954	0.542134	3.6886	0.445122	0.198134	0.829263	0.681925	0.799766	1.52534	0.236791	0.189565	0.157111	0.100692	1.43126	3.25688	0.800558
7	3	1	1	1.19749	1.41469	4.43313	0.510916	0.722967	0.196368	0.393197	2.39902	6.5618	1.41504	2.00235	0.946755	1.93487	2.41829	6.37902	0.340063	0.823262	0.0750967	0.440127	3.60577	11.6916	2.42091	5.8608	0.744634	0.422848	0.599114	2.64905	0.80356	0.481931	0.720282	0.259081	0.61398	5.19225	0.599745	0.359694	0.785466	0.21039	0.282891	0.770643	0.680995	0.192489	1.28334	0.102533	0.317414	2.02548	0.282658
7	4	1	1	0.572226	0.703684	1.96217	1.34303	0.945905	1.1633	0.577055	1.00553	3.82685	0.704307	0.496048	0.94065	1.66744	1.9521	4.37297	1.05768	2.0671	0.289798	1.1069	3.16573	8.51815	1.95437	3.81957	0.606404	0.823517	0.989771	2.53794	1.00786	0.998692	0.539873	0.530101	1.44304	4.89445	0.990908	0.9819	0.603932	0.477881	0.59148	1.56887	0.981607	0.581265	0.884645	0.3102	0.759704	2.96934	0.592156
7	1	1	1	0.274944	0.360247	1.59921	0.835088	0.301138	1.32187	0.171892	0.419293	2.17293	0.360607	0.130037	0.940992	0.142464	0.184922	0.651327	0.971181	0.179606	2.89986	0.0991786	0.211822	1.27269	0.184936	0.0342011	0.924931	0.39964	0.565116	1.64846	0.755248	0.42718	0.743686	0.23792	0.503204	4.04592	0.565615	0.319921	0.85042	0.0813487	0.101618	0.301752	0.750256	0.0762574	4.11216	0.042483	0.131638	0.608601	0.101642
7	2	1	1	0.495942	0.616926	2.50792	0.502063	0.310031	0.449645	0.17146	0.887313	3.70179	0.617514	0.381323	0.894585	0.723414	0.914742	2.84642	0.549798	0.503381	0.326781	0.273932	1.1739	6.1008	0.915573	0.838274	0.817264	0.356546	0.464954	2.15068	0.635241	0.295645	0.737601	0.159767	0.599532	3.64383	0.465407	0.216603	0.852899	0.741063	0.869327	1.88469	0.209278	0.182106	0.128059	0.0969644	1.52745	3.75438	0.870163
7	3	1	1	1.61268	1.8548	5.68011	0.505351	0.937976	0.14386	0.495609	3.24267	7.98097	1.85609	3.44506	0.789057	2.22574	2.90359	5.79634	0.351958	1.02259	0.06378	0.538401	3.61905	13.7052	2.90543	8.44153	0.672357	0.348465	0.442729	1.32674	0.592214	0.262387	0.737568	0.144786	0.532694	2.47678	0.44306	0.196303	0.980437	0.14413	0.183162	0.463978	0.70479	0.12915	2.1005	0.0705332	0.249641	1.14762	0.183246
7	4	1	1	0.56278	0.710514	2.1903	1.04978	0.746557	0.907975	0.459204	0.955867	4.22213	0.711158	0.505745	1.11262	1.19377	1.44653	3.72482	1.06646	1.54411	0.399343	0.837162	2.16574	7.46123	1.44788	2.09635	0.659514	0.790047	1.02388	2.61599	0.897107	0.919413	0.462142	0.48541	1.24134	5.76348	1.02486	1.05035	0.649754	0.424625	0.517997	1.3948	1.01126	0.524324	1.04194	0.280104	0.760401	2.70195	0.518487
8	1	1	1	0.150234	0.207573	0.898983	0.688196	0.142944	1.88605	0.0813697	0.212098	1.26815	0.207708	0.0431428	0.931606	0.167613	0.245739	1.29725	0.915189	0.225121	2.12725	0.128715	0.219389	2.37397	0.245983	0.0605076	0.924786	0.152285	0.217336	0.943259	0.728643	0.158529	1.8197	0.0861367	0.189403	1.54693	0.217567	0.0473356	0.833369	0.104714	0.143081	0.679625	0.815854	0.116812	3.1043	0.0636376	0.155817	1.05159	0.143178
8	2	1	1	0.207473	0.263733	1.14235	0.472958	0.124822	1.00734	0.0701642	0.335193	1.67529	0.263919	0.0696532	0.975824	0.221687	0.296104	0.943998	0.866059	0.256621	1.60168	0.140626	0.333413	2.21932	0.296309	0.087799	0.939088	0.118737	0.159534	0.769351	0.615882	0.0982863	2.09961	0.0534723	0.181668	1.21964	0.159586	0.0254678	0.998819	0.279743	0.378566	1.08722	0.349792	0.132361	0.499202	0.0714788	0.376307	2.22199	0.378399
8	3	1	1	0.922043	1.14943	4.65572	0.386759	0.44504	0.180823	0.239425	1.52936	5.97712	1.15069	1.32408	0.607196	1.18087	1.62566	4.4533	0.274691	0.447054	0.0905907	0.239947	1.59066	10.3185	1.62748	2.6487	0.552104	0.196788	0.275259	0.756279	0.448682	0.123645	0.882895	0.0670478	0.242256	1.89706	0.275574	0.0759408	0.713175	0.226033	0.358273	1.3798	0.40746	0.146133	0.616657	0.0793177	0.220127	2.58895	0.358644
8	4	1	1	0.0875517	0.116729	0.476897	0.801197	0.0935902	3.97405	0.0542269	0.120655	0.669997	0.116813	0.0136453	0.834108	0.138341	0.19547	0.508436	0.79844	0.156224	2.22273	0.0850934	0.171963	1.19988	0.195661	0.0382834	0.593694	0.0710208	0.0933388	0.267905	0.687632	0.0642399	3.89291	0.0339759	0.106615	0.485286	0.0934218	0.00872763	0.645398	0.0613843	0.0816071	0.247573	0.771503	0.0629165	4.99299	0.0332059	0.0866326	0.448709	0.0815506
8	1	1	1	0.192939	0.246547	1.12507	0.789218	0.194601	1.74771	0.106259	0.311837	1.53242	0.246574	0.0607989	0.860189	0.188982	0.234792	0.644779	0.954814	0.224531	2.30383	0.127399	0.314878	1.24189	0.235157	0.0552988	0.845513	0.244368	0.340204	1.0288	0.589495	0.200861	0.929488	0.107913	0.327661	2.40084	0.340733	0.116099	0.717687	0.135411	0.178954	0.474381	0.692377	0.123971	2.11422	0.0677801	0.221831	1.05126	0.179051
8	2	1	1	0.382079	0.480451	1.89905	0.324351	0.155887	0.365336	0.084388	0.630621	2.64758	0.480612	0.230987	0.689125	0.236965	0.333459	1.72113	0.684937	0.228577	1.15488	0.128618	0.32135	3.13061	0.33372	0.111369	0.938908	0.464454	0.650148	1.87572	0.253336	0.164821	0.208631	0.0883103	0.611246	4.06264	0.650603	0.423284	0.601924	0.217927	0.306479	0.893066	0.357652	0.1097	0.626514	0.0589413	0.294324	2.023	0.306722
8	3	1	1	0.938681	1.11805	3.32543	0.39643	0.443638	0.186234	0.233229	1.67649	4.99019	1.11908	1.25234	0.704039	1.33454	1.76015	4.24154	0.259209	0.456587	0.0770418	0.239042	1.99109	9.30017	1.76146	3.10275	0.535195	0.224571	0.302357	1.01738	0.427425	0.129334	0.76249	0.0698131	0.319686	1.97226	0.302588	0.0915594	0.733002	0.151256	0.215997	0.856368	0.493605	0.106707	1.24499	0.0581829	0.205039	1.60275	0.216179
8	4	1	1	0.0223529	0.0352556	0.25151	0.441461	0.015583	6.90599	0.00860483	0.0342695	0.308394	0.0352987	0.001246	0.809813	0.0253467	0.0414229	0.0868848	0.580801	0.0240436	7.9782	0.0136726	0.0357486	0.359326	0.0413974	0.00171374	0.783283	0.0207549	0.0324341	0.184005	0.480769	0.015569	8.10694	0.00850173	0.0268836	0.263361	0.0323836	0.0010487	0.740191	0.0132323	0.0190193	0.112638	0.726045	0.0138053	21.1099	0.00763222	0.0198558	0.171367	0.0190144
8	1	1	1	0.262209	0.339968	1.66112	0.764892	0.26037	1.23775	0.143421	0.429879	2.16872	0.340401	0.115873	0.920309	0.235488	0.318342	1.37447	0.997207	0.317856	1.77171	0.180004	0.379267	2.53427	0.318746	0.101599	0.846089	0.291195	0.410089	1.37128	0.655658	0.269227	0.865034	0.145853	0.387161	2.28673	0.410621	0.16861	0.789562	0.134587	0.174163	0.523516	0.821245	0.143217	2.54858	0.0775065	0.210809	0.953983	0.174389
8	2	1	1	0.46603	0.574427	1.91354	0.333361	0.191344	0.308125	0.101515	0.810538	2.64772	0.573986	0.329459	0.673693	0.266615	0.356636	1.20325	0.629524	0.22469	0.971709	0.123788	0.398091	2.37621	0.35692	0.127392	0.90077	0.700081	0.88571	1.82917	0.20717	0.183687	0.124699	0.0980315	1.11846	4.24507	0.886647	0.786144	0.504537	0.202006	0.273728	0.669209	0.383946	0.1052	0.767064	0.0575866	0.238398	1.42569	0.273996
8	3	1	1	0.873046	1.02439	3.23679	0.418233	0.428958	0.215474	0.226667	1.70625	4.46632	1.02564	1.05194	0.648754	1.15887	1.5384	3.50652	0.291605	0.44898	0.100419	0.238057	1.66527	8.03635	1.53969	2.37064	0.546357	0.236453	0.343857	1.06376	0.52829	0.181819	0.812747	0.0962699	0.304361	2.39726	0.344166	0.11845	0.721929	0.182407	0.278301	0.626833	0.486871	0.135473	0.929343	0.0719539	0.216908	2.10606	0.278253
8	4	1	1	0.0213203	0.0345658	0.254771	0.479925	0.0161171	8.14995	0.00919144	0.0259643	0.299438	0.0335826	0.00112779	0.77986	0.0202976	0.0321331	0.23332	0.737177	0.0236929	12.9948	0.0134233	0.0276125	0.367005	0.03214	0.00103298	0.912968	0.0126817	0.0209961	0.111558	0.611505	0.0127165	16.3963	0.00709058	0.0162178	0.231903	0.0207954	0.00043245	0.738085	0.0105878	0.0145578	0.0578187	0.761185	0.0109346	30.0792	0.00620712	0.0156096	0.117644	0.0143652
8	1	1	1	0.311821	0.386481	1.48411	0.698129	0.270056	0.97132	0.145345	0.495734	1.96839	0.386828	0.149636	0.86528	0.218278	0.287101	0.908574	0.877981	0.252293	1.77092	0.146231	0.351758	2.05574	0.287356	0.0825736	0.969993	0.298406	0.457486	1.52201	0.622022	0.284708	0.724775	0.151842	0.268851	2.84197	0.457715	0.209503	0.681045	0.13978	0.191011	0.609098	0.758805	0.14509	2.14391	0.078383	0.194489	1.13214	0.191209
8	2	1	1	0.568471	0.679213	1.96793	0.335079	0.227738	0.256795	0.118621	1.03309	2.88916	0.679655	0.461931	0.668393	0.311667	0.430272	1.61993	0.540787	0.232799	0.69171	0.128184	0.442526	3.16737	0.430483	0.185315	0.908055	0.823159	1.0406	2.1475	0.209174	0.217566	0.104543	0.1131	1.27601	4.77149	1.04012	1.08185	0.528851	0.239733	0.312188	1.07169	0.357276	0.111473	0.61462	0.0598323	0.362126	1.81456	0.312007
8	3	1	1	0.927341	1.13354	3.92245	0.492269	0.558386	0.22776	0.293049	1.58412	5.4288	1.13431	1.28666	0.677385	1.23861	1.67169	4.09037	0.341854	0.571935	0.106699	0.298657	1.69897	9.20836	1.67304	2.79907	0.592198	0.187947	0.257944	1.06158	0.585272	0.151103	1.20949	0.0806181	0.256667	1.77002	0.258175	0.0666545	0.805901	0.27046	0.400313	1.72919	0.438596	0.175725	0.584925	0.0938938	0.290715	2.84369	0.400653
8	4	1	1	0.0471586	0.0704646	0.400226	0.698836	0.0491782	5.74952	0.0284725	0.0678195	0.52073	0.0703716	0.00495216	0.934484	0.0707399	0.100951	0.26751	0.726538	0.0733613	3.81662	0.038913	0.0932298	0.71143	0.100974	0.0101957	0.642248	0.0481968	0.0630065	0.234237	0.782659	0.0493527	6.57954	0.0261621	0.0741662	0.378861	0.0630578	0.00397629	0.625529	0.0257036	0.0373072	0.16602	0.697843	0.0260435	10.0179	0.0139528	0.0376669	0.316247	0.0373199
8	1	1	1	0.313541	0.378451	1.37353	0.8277	0.313619	1.2082	0.173459	0.550422	1.87449	0.378904	0.143568	0.872885	0.248895	0.338122	1.30985	1.02727	0.347738	1.72163	0.197275	0.373318	2.39449	0.338506	0.114586	0.931777	0.294839	0.423171	1.46493	0.779965	0.330352	1.01035	0.181248	0.318659	2.5832	0.423547	0.179392	0.771387	0.0992787	0.127035	0.403772	1.00782	0.128129	4.41774	0.0714053	0.160309	0.757007	0.127135
8	2	1	1	0.482906	0.593017	1.75915	0.36723	0.217686	0.32528	0.114299	0.884206	2.60023	0.592779	0.351387	0.71429	0.244556	0.316451	1.31296	0.740277	0.234459	1.29353	0.129755	0.393073	2.42574	0.316718	0.10031	0.88915	0.796591	0.995817	2.46282	0.238831	0.238077	0.125773	0.12498	1.35062	4.96822	0.996843	0.993696	0.586103	0.245738	0.293522	0.660565	0.359013	0.105487	0.654851	0.0565349	0.437019	1.34301	0.293824
8	3	1	1	0.908121	1.06625	3.58758	0.49038	0.52323	0.243395	0.277096	1.65055	4.89861	1.06699	1.13846	0.6292	1.14857	1.5641	3.5754	0.34782	0.544543	0.117597	0.288238	1.54347	8.4365	1.56559	2.45107	0.561303	0.163047	0.212915	0.52552	0.700231	0.149275	1.81013	0.0822623	0.244797	1.26797	0.21318	0.0454456	0.855894	0.214212	0.303209	0.81544	0.437683	0.132729	0.777033	0.0714579	0.238516	1.73279	0.303253
8	4	1	1	0.0349848	0.0487386	0.214106	0.434299	0.0206669	5.18334	0.0117377	0.052505	0.27603	0.0475869	0.00226451	0.813567	0.0285791	0.0427521	0.128753	0.823436	0.0352426	10.7406	0.0196746	0.0380346	0.346026	0.0427995	0.0018318	0.847287	0.019136	0.0284704	0.142183	0.642987	0.0183256	12.2859	0.00997976	0.0231498	0.23223	0.0285008	0.000812293	0.740053	0.0186423	0.0268123	0.109769	0.725064	0.0194517	15.0257	0.0108143	0.0259051	0.221397	0.0268276
9	1	1	1	0.0697741	0.0866651	0.232109	1.26361	0.109652	8.84714	0.06662	0.113608	0.426323	0.0867763	0.00753012	0.687619	0.198517	0.234074	0.410924	1.15144	0.270136	2.90631	0.159965	0.367651	0.899504	0.234607	0.0550405	0.751757	0.0625934	0.0786721	0.208112	1.0548	0.0831615	7.66081	0.0476191	0.104857	0.428198	0.0788412	0.00621594	0.733659	0.229916	0.274768	0.603309	1.45641	0.401083	3.18947	0.241892	0.405709	1.23119	0.275392
9	2	1	1	0.254893	0.296329	0.623272	0.392354	0.116366	0.698574	0.061448	0.492982	1.20986	0.296584	0.0879621	0.787264	0.171694	0.210208	0.643948	0.665768	0.140026	1.7714	0.0783588	0.300658	1.25778	0.210323	0.0442356	0.863631	0.428007	0.489729	0.929082	0.18661	0.0913133	0.199294	0.047719	0.963726	1.649	0.489327	0.239441	0.506575	0.358664	0.405222	0.658881	0.243836	0.0987864	0.322873	0.0529945	0.770952	1.46452	0.405135
9	3	1	1	0.662589	0.774119	2.29414	0.445376	0.345088	0.306848	0.184217	1.2858	3.68775	0.774824	0.600352	0.850254	1.18395	1.39967	3.67089	0.250983	0.351685	0.095121	0.186765	2.21055	6.74687	1.40123	1.96345	0.651606	0.535224	0.619885	1.08719	0.221669	0.137563	0.185386	0.0713958	1.06564	2.34091	0.620579	0.385119	0.577339	0.135604	0.167025	0.502981	0.555243	0.0925436	1.83799	0.0510588	0.225726	0.877491	0.166672
9	4	1	1	0.0799947	0.104761	0.409606	1.0552	0.110662	6.14287	0.0675619	0.124693	0.646548	0.104873	0.0109984	0.950831	0.202012	0.247258	0.689632	1.01184	0.250545	2.21831	0.136011	0.340422	1.15387	0.247614	0.0613127	0.717208	0.0679533	0.0831965	0.181585	0.971878	0.0809764	6.19501	0.0430066	0.119217	0.391638	0.0833195	0.00694214	0.625245	0.0957107	0.119832	0.295573	1.11446	0.133732	5.39391	0.0776691	0.15875	0.632761	0.119998
9	1	1	1	0.067988	0.0832025	0.220735	1.05826	0.088166	7.64816	0.0530849	0.121725	0.477966	0.0833119	0.00694087	0.975669	0.187757	0.221133	0.406115	1.00028	0.221524	2.53987	0.124569	0.350808	0.919918	0.221462	0.0490456	0.830177	0.0508973	0.0621663	0.126677	0.996783	0.0620524	8.95022	0.0346857	0.0905295	0.316023	0.0622527	0.0038754	0.961515	0.185185	0.22182	0.447137	1.41516	0.314329	3.78407	0.186688	0.339915	1.05475	0.222115
9	2	1	1	0.255975	0.304432	0.820249	0.360234	0.109761	0.636024	0.0590472	0.472738	1.39713	0.304693	0.092838	0.77292	0.200065	0.248339	0.866505	0.508016	0.126255	1.15408	0.0712818	0.331163	1.3367	0.248526	0.0617652	0.930528	0.402812	0.460743	0.947054	0.171884	0.0792393	0.195787	0.0416099	0.821582	1.6384	0.461005	0.212526	0.483445	0.369554	0.419772	0.639105	0.214854	0.0902569	0.275818	0.048674	0.777252	1.66978	0.420085
9	3	1	1	0.411122	0.480737	1.22329	0.441828	0.212629	0.504532	0.11685	0.812779	2.07243	0.481249	0.231601	0.863105	0.834264	0.957142	1.98305	0.240853	0.230742	0.137522	0.126218	1.72682	3.60694	0.95802	0.917803	0.676986	0.278446	0.324671	0.59187	0.20637	0.0670782	0.341973	0.0361294	0.553304	1.2371	0.325038	0.10565	0.624874	0.0900689	0.111206	0.287346	0.519749	0.0575929	2.62564	0.0322393	0.148308	0.51721	0.110809
9	4	1	1	0.0211778	0.0266277	0.109501	0.987224	0.0262765	21.6994	0.0153727	0.034541	0.166604	0.0266166	0.000708442	1.03018	0.0383286	0.0479766	0.176398	1.15416	0.0553814	14.1778	0.0326441	0.0636318	0.304724	0.0479843	0.00230249	0.932456	0.00911811	0.0127459	0.0523741	0.982632	0.0125182	42.9899	0.00697697	0.0135396	0.0997798	0.0127394	0.000162293	0.892971	0.0202441	0.0240311	0.0616921	0.999299	0.0239917	22.264	0.0128332	0.0356603	0.11373	0.0240085
9	1	1	1	0.0790288	0.0976326	0.25918	1.14235	0.111499	7.14834	0.0680996	0.139247	0.473188	0.0976045	0.00952663	1.07233	0.175057	0.206042	0.368918	0.952272	0.196432	2.53385	0.107816	0.326667	0.878198	0.206278	0.0425505	0.874544	0.0481666	0.0592388	0.156975	0.926649	0.0549269	8.41423	0.0295634	0.089629	0.286852	0.0592748	0.0035135	0.911728	0.12159	0.159724	0.463993	1.17446	0.187803	4.32863	0.110684	0.184872	0.953624	0.159907
9	2	1	1	0.274291	0.326319	0.847487	0.356091	0.116298	0.577392	0.0615871	0.483543	1.47553	0.326595	0.106664	0.71997	0.24083	0.29783	1.0644	0.579727	0.17253	1.08868	0.0964229	0.43828	1.61079	0.297605	0.0885689	0.785068	0.469371	0.538211	1.11881	0.186693	0.100385	0.182148	0.0526629	0.988236	1.86893	0.5377	0.289121	0.46867	0.322582	0.369537	0.628519	0.229687	0.0847941	0.334663	0.0456108	0.650913	1.50849	0.369173
9	3	1	1	0.406434	0.48382	1.27347	0.409786	0.19836	0.461375	0.108105	0.7661	2.37174	0.484058	0.234312	0.856122	0.864417	0.99324	2.4355	0.20848	0.207209	0.114031	0.112645	1.75602	4.47869	0.993906	0.987849	0.616951	0.30503	0.356331	0.985133	0.199457	0.0711199	0.301906	0.0383843	0.594194	1.84783	0.356567	0.12714	0.581306	0.157255	0.18908	0.755318	0.335183	0.0634059	0.981781	0.0351326	0.293583	1.1756	0.189168
9	4	1	1	0.0188767	0.0257645	0.102494	0.712016	0.0177253	16.3793	0.0101509	0.0290696	0.143524	0.0248945	0.000619738	0.963559	0.0226036	0.0280282	0.0773441	1.18318	0.0330584	24.4442	0.0190827	0.039483	0.15531	0.0279403	0.000780662	0.906172	0.00589227	0.00754418	0.0206149	1.04406	0.00784741	78.7457	0.00444863	0.00928634	0.0492395	0.00751622	5.64936e-05	0.822297	0.00967093	0.0121615	0.0369127	1.11652	0.0135887	52.1195	0.00772005	0.0169438	0.0674232	0.0121705
9	1	1	1	0.0529707	0.0647191	0.186098	1.19481	0.0774219	10.8046	0.0453672	0.0925532	0.350949	0.0647987	0.00419887	1.00564	0.126787	0.149364	0.332534	0.936041	0.139953	3.34276	0.0747279	0.233806	0.69926	0.149516	0.0223551	0.757839	0.0443083	0.0541517	0.126783	0.907439	0.0491994	8.95019	0.0263097	0.0799889	0.270613	0.0542178	0.00293957	0.810847	0.0768293	0.100969	0.257281	1.14168	0.115399	6.59495	0.0673791	0.115155	0.627657	0.101078
9	2	1	1	0.224173	0.26617	0.560488	0.31037	0.0826581	0.6313	0.0447761	0.438264	1.13332	0.266321	0.0709268	0.718256	0.242181	0.296104	0.94064	0.392916	0.115785	0.744238	0.0646279	0.467082	1.53391	0.294682	0.0868377	0.841225	0.382021	0.434924	0.912057	0.15294	0.0665535	0.187374	0.0354819	0.792774	1.59495	0.43516	0.189364	0.453793	0.214627	0.247184	0.414265	0.237873	0.0588348	0.530807	0.0324724	0.419741	0.999125	0.247337
9	3	1	1	0.3511	0.409267	0.834436	0.408298	0.166818	0.55508	0.0926592	0.71847	1.6387	0.40857	0.166929	0.856606	0.700317	0.800668	1.58102	0.220018	0.176357	0.151096	0.0970781	1.4127	3.00121	0.801555	0.642491	0.657751	0.24141	0.274418	0.440688	0.202943	0.0557544	0.404523	0.030532	0.497477	0.993378	0.27473	0.0754765	0.583969	0.13552	0.154374	0.328262	0.286416	0.0442555	1.03219	0.0246432	0.274393	0.618743	0.154514
9	4	1	1	0.0202623	0.0254913	0.0725433	0.877414	0.0221083	19.9424	0.0126613	0.0363675	0.140569	0.0251971	0.000634894	0.978265	0.033058	0.0427537	0.124226	0.964139	0.0412197	12.3445	0.0225634	0.0550541	0.257442	0.0427529	0.00182781	0.841925	0.0108979	0.0147779	0.0619851	0.887501	0.0131309	32.4236	0.00709764	0.0166672	0.0947882	0.0147954	0.000218904	0.775779	0.0149814	0.0197202	0.0972896	0.880682	0.0173866	24.2372	0.0094466	0.0253783	0.148628	0.0197422
9	1	1	1	0.0614656	0.0744736	0.241891	1.19402	0.0890131	9.38297	0.0521468	0.112374	0.402807	0.0745493	0.0055576	1.02517	0.119822	0.13834	0.319496	0.946649	0.131062	3.63716	0.0697173	0.23428	0.567428	0.138449	0.0191681	0.761103	0.0482259	0.0593498	0.183007	0.869584	0.0515752	7.85029	0.0276149	0.084419	0.32675	0.0593102	0.0035177	0.778346	0.113518	0.145071	0.446684	1.13493	0.164811	4.50108	0.0949176	0.181249	0.911755	0.145216
9	2	1	1	0.270368	0.309896	0.659191	0.316442	0.0981601	0.536115	0.0515869	0.558955	1.21215	0.310199	0.0962236	0.660321	0.253539	0.320013	0.926641	0.4342	0.138956	0.75878	0.0777127	0.400354	2.02424	0.320028	0.102418	0.864008	0.508243	0.572496	1.02214	0.144155	0.0825633	0.132468	0.0434533	1.09186	1.89719	0.572738	0.328029	0.431642	0.18223	0.21436	0.389066	0.257295	0.0551855	0.660302	0.0303759	0.340093	0.957447	0.214483
9	3	1	1	0.404487	0.483461	1.29875	0.357613	0.173066	0.403399	0.0944788	0.74133	2.40198	0.483949	0.234207	0.820157	0.76959	0.91896	2.41386	0.194705	0.179105	0.114922	0.0972441	1.49739	4.45972	0.919877	0.846174	0.578905	0.234485	0.276444	0.474212	0.18026	0.0498365	0.351403	0.0268597	0.476816	1.26447	0.27647	0.0764357	0.550616	0.119082	0.144148	0.381854	0.317211	0.0457613	1.21004	0.0251826	0.214281	0.749092	0.144262
9	4	1	1	0.0153644	0.0205946	0.0736955	0.762186	0.0154509	21.5258	0.00884598	0.02351	0.130224	0.0202718	0.000410947	0.96294	0.0171852	0.0231721	0.051067	0.841867	0.0194872	20.5692	0.0110213	0.0278746	0.154661	0.0231476	0.000535813	1.07992	0.00547759	0.00757985	0.0350619	0.722469	0.00548206	52.7463	0.00303698	0.00790649	0.0552086	0.00758796	5.75771e-05	0.962274	0.00863016	0.0114487	0.0710769	1.05229	0.0120041	52.1363	0.00678463	0.0144659	0.0996547	0.0114076
10	1	1	1	0.0664744	0.0893108	0.436487	0.660956	0.0590532	4.25331	0.0339523	0.100821	0.643222	0.0893451	0.00798255	1.25535	0.0791017	0.112214	0.522985	0.841312	0.0944408	4.18718	0.0527627	0.10928	1.15774	0.112254	0.012601	1.12266	0.0574537	0.0772249	0.493588	0.841141	0.0649739	6.04628	0.0360768	0.0947668	0.737268	0.0772449	0.00596678	1.21889	0.0982068	0.128219	0.494202	1.01772	0.13054	4.42615	0.0728201	0.15422	1.02467	0.128266
10	2	1	1	0.428211	0.501161	1.5099	0.480612	0.24103	0.526428	0.132402	0.788643	2.51486	0.501507	0.251509	0.889812	0.353932	0.457082	1.89366	0.946982	0.433283	1.15165	0.24109	0.582232	2.97428	0.457541	0.209344	0.944131	0.888596	1.02831	2.08734	0.244752	0.251939	0.126509	0.134047	1.801	3.81181	1.02936	1.05959	0.669877	0.270986	0.359294	0.897849	0.544455	0.195797	0.838952	0.1085	0.414498	2.16364	0.359621
10	3	1	1	1.41898	1.71351	5.02927	0.704547	1.20857	0.218591	0.643211	2.61977	7.35074	1.71538	2.94254	0.809766	2.26689	2.8482	7.31471	0.470003	1.34009	0.0864438	0.702753	3.65243	12.3613	2.85124	8.1296	0.664277	0.198475	0.264321	0.699936	0.64132	0.169682	1.30887	0.0916255	0.321387	1.73369	0.264582	0.0700036	0.911997	0.245783	0.317609	0.892771	0.688999	0.21888	1.17868	0.118951	0.364389	2.00966	0.317678
10	4	1	1	0.030193	0.0413773	0.129885	0.448809	0.0179824	6.53306	0.0104879	0.0460752	0.182007	0.0400669	0.00160536	0.954411	0.0296356	0.0379975	0.0866335	1.03997	0.0395632	15.4266	0.0223261	0.0482839	0.289971	0.0380428	0.00144725	0.875637	0.0248799	0.0316521	0.101452	1.17045	0.0369283	20.717	0.0206225	0.038458	0.190793	0.0315506	0.000995439	0.619459	0.0256635	0.031394	0.096374	1.21677	0.0382439	21.759	0.0214955	0.046313	0.172241	0.0314307
10	1	1	1	0.111303	0.142972	0.504675	0.826298	0.118178	3.38628	0.0692662	0.181209	0.908657	0.143021	0.0204549	1.03689	0.123614	0.150386	0.478239	0.930579	0.13992	3.46615	0.0783612	0.224399	0.892627	0.150358	0.0226076	1.03036	0.0799339	0.10209	0.266779	0.967262	0.0988303	5.31872	0.0555265	0.132356	0.654375	0.102175	0.0104398	0.958565	0.196887	0.245194	0.69876	1.01018	0.247965	2.27568	0.137117	0.327487	1.36156	0.245466
10	2	1	1	0.749082	0.892264	2.62266	0.513155	0.458439	0.319728	0.25518	1.43171	4.06249	0.893373	0.798116	0.934393	0.864967	1.17865	3.58843	0.584838	0.690187	0.270991	0.377413	1.15259	7.36246	1.18013	1.39271	0.850908	0.872905	1.09138	2.37308	0.284932	0.311361	0.139651	0.166759	1.48861	4.62687	1.09276	1.19411	0.680864	0.383269	0.506234	1.35471	0.497181	0.252002	0.529868	0.136127	0.595276	2.76555	0.506861
10	3	1	1	1.0924	1.30425	4.35185	0.679477	0.887103	0.280272	0.477724	2.08117	6.37129	1.30557	1.7045	0.849291	1.96697	2.37089	6.34406	0.404794	0.95996	0.0908554	0.510963	3.63577	10.8079	2.37148	5.62392	0.689933	0.132188	0.171517	0.475603	0.692176	0.118844	2.21852	0.0654013	0.206682	1.04978	0.171696	0.0294797	0.935384	0.152327	0.187602	0.475916	0.765218	0.143707	2.21033	0.0779548	0.277869	1.11632	0.187799
10	4	1	1	0.021643	0.0287653	0.123869	0.723066	0.0205544	15.129	0.0122254	0.0350252	0.185105	0.0284267	0.000808079	1.0248	0.0368902	0.0455268	0.170227	1.15091	0.0523602	14.272	0.0295396	0.0620743	0.272929	0.0454947	0.00206976	0.811206	0.0220875	0.0273752	0.077083	1.22187	0.033485	25.052	0.0188147	0.0365935	0.141512	0.0274048	0.000751023	0.769944	0.0290911	0.0348838	0.104523	1.19219	0.0416475	19.0222	0.0232139	0.0550765	0.190593	0.0349336
10	1	1	1	0.0852398	0.108611	0.413015	0.810734	0.0881701	4.37308	0.0517217	0.137976	0.707483	0.108753	0.0118273	1.00043	0.0922903	0.113907	0.375827	1.00606	0.114616	4.91874	0.0638404	0.167363	0.691349	0.113926	0.012979	0.90266	0.0762844	0.101177	0.341277	0.938163	0.0949721	5.07572	0.0520156	0.118372	0.699688	0.101232	0.0102479	0.855444	0.154817	0.197789	0.640872	1.06804	0.2115	3.01	0.118036	0.245644	1.22705	0.198027
10	2	1	1	0.581198	0.679376	1.94338	0.475905	0.323201	0.380182	0.175346	1.15454	3.16609	0.67913	0.461217	0.81353	0.673289	0.846451	2.39981	0.737513	0.625003	0.478712	0.343796	1.12403	4.97372	0.847448	0.718168	0.89838	0.710737	0.871801	1.87692	0.261319	0.228042	0.160424	0.122167	1.36522	3.57974	0.872656	0.761528	0.65647	0.594448	0.78813	1.90268	0.329972	0.260304	0.226436	0.140913	0.942125	4.26154	0.788866
10	3	1	1	0.926106	1.11588	2.85452	0.700252	0.781684	0.33911	0.422565	1.67623	4.59648	1.11629	1.2461	0.825329	1.5345	1.91433	4.54217	0.439187	0.840597	0.122962	0.450452	2.55532	8.80768	1.91398	3.66334	0.709411	0.116044	0.151756	0.296856	0.78774	0.11959	2.87288	0.066213	0.194889	0.856386	0.151814	0.0230476	0.91791	0.125651	0.159795	0.403212	0.846494	0.135005	2.85046	0.0725048	0.209623	0.852086	0.159487
10	4	1	1	0.0299921	0.0431251	0.0953522	0.445617	0.019133	6.10433	0.0112533	0.0443486	0.335788	0.042936	0.0018435	1.05814	0.0361563	0.0447884	0.0913008	1.18334	0.0527997	14.9701	0.0298039	0.0626699	0.241876	0.0446194	0.00199089	0.836793	0.0235662	0.0302759	0.109834	1.16521	0.0353081	21.4448	0.0196908	0.0381665	0.188165	0.0303019	0.000918207	0.68823	0.0281609	0.0343168	0.102623	1.19499	0.0410456	19.3495	0.0228281	0.0485111	0.185311	0.0343479
10	1	1	1	0.0798351	0.104565	0.397552	0.730182	0.0764175	3.96061	0.0433796	0.121288	0.648347	0.104655	0.0109528	1.02296	0.0748982	0.0927406	0.250134	0.940766	0.0873111	5.77895	0.0497765	0.131472	0.538809	0.0928085	0.00861342	1.04149	0.0710935	0.0942213	0.235823	0.738666	0.069664	4.33743	0.0385792	0.113462	0.664529	0.0943106	0.00889449	0.971363	0.121222	0.160278	0.694999	1.01882	0.163452	3.50788	0.0902875	0.19255	1.25349	0.160432
10	2	1	1	0.662066	0.795577	2.87531	0.515383	0.410356	0.355834	0.225584	1.28551	4.16669	0.796215	0.633959	0.873864	0.827083	1.08886	3.79823	0.615783	0.669966	0.310582	0.367644	1.257	6.62275	1.08799	1.18372	0.903909	0.644336	0.829477	1.84726	0.274967	0.228003	0.180704	0.124248	1.00906	3.86559	0.829202	0.687576	0.703509	0.434376	0.56415	1.3694	0.347432	0.195975	0.333487	0.106106	0.661378	2.97137	0.564067
10	3	1	1	0.809362	1.02974	3.85943	0.666825	0.687483	0.348272	0.370184	1.39426	5.34899	1.03098	1.06292	0.859146	1.37851	1.72842	5.24279	0.417284	0.722079	0.129157	0.386745	2.30387	8.4076	1.73042	2.99437	0.726865	0.107903	0.140234	0.339757	0.828019	0.116079	3.25292	0.0639291	0.170312	0.927555	0.140189	0.0196529	0.875681	0.129213	0.166021	0.48586	0.764266	0.126867	2.51308	0.0692495	0.202805	1.06844	0.165999
10	4	1	1	0.0284956	0.0386877	0.181788	0.641657	0.0239878	10.2067	0.0142646	0.0462034	0.237371	0.0373841	0.00139757	1.06584	0.0423208	0.0533525	0.180728	1.15763	0.0618281	12.0794	0.034457	0.0687232	0.356799	0.0534092	0.00285255	0.841117	0.0254576	0.032994	0.14073	1.12414	0.03711	19.2664	0.0209961	0.0426743	0.251915	0.0330118	0.00108978	0.80723	0.0269929	0.0336881	0.111611	1.14319	0.0385392	19.1029	0.0217104	0.0476784	0.21209	0.033712
10	1	1	1	0.0971525	0.124571	0.529021	0.796594	0.0993328	3.64294	0.0566453	0.148113	0.869493	0.124697	0.0155493	1.06052	0.0943992	0.121661	0.316869	0.911571	0.111022	4.21311	0.0624942	0.149274	0.756627	0.121792	0.0148333	1.03038	0.0907407	0.112945	0.282456	0.705168	0.0797304	3.40897	0.0435799	0.147581	0.634891	0.113066	0.0127839	0.93147	0.147588	0.190351	0.677167	1.05111	0.200293	3.07869	0.111791	0.230176	1.20208	0.190555
10	2	1	1	0.544878	0.640642	1.52824	0.502638	0.322028	0.434021	0.178151	1.00567	2.73697	0.640677	0.410467	0.866592	0.575832	0.784884	2.4377	0.676667	0.531251	0.472868	0.291467	0.807607	4.48367	0.7851	0.616382	0.774233	0.831675	0.979011	1.9333	0.259806	0.254578	0.141079	0.135458	1.68709	3.76528	0.979876	0.960156	0.672118	0.555671	0.716963	1.48749	0.337056	0.241696	0.252228	0.129697	0.909202	3.1677	0.717081
10	3	1	1	0.905109	1.11232	3.76746	0.696194	0.775203	0.338587	0.419798	1.62459	5.39467	1.11349	1.23985	0.852029	1.5906	1.9422	5.00933	0.424375	0.82521	0.117163	0.443015	2.93536	10.2132	1.94453	3.7812	0.742124	0.114416	0.147006	0.424127	0.733841	0.107969	2.76414	0.0598345	0.189134	1.08693	0.147128	0.0216467	0.890114	0.166245	0.212054	0.510738	0.653729	0.138769	1.6789	0.0756512	0.262115	1.23005	0.212273
10	4	1	1	0.0244643	0.0340369	0.125762	0.533932	0.0172235	9.81729	0.0102155	0.0353727	0.175143	0.0322577	0.00104056	1.05307	0.0324355	0.0390429	0.0970349	1.21942	0.0476651	17.5755	0.0268534	0.0564321	0.211942	0.0390882	0.00152789	0.891238	0.0173777	0.0215429	0.0621022	1.20248	0.0256462	31.4012	0.0142836	0.0281189	0.112726	0.0213278	0.000454874	0.857592	0.0203668	0.0249882	0.062025	1.12898	0.0282449	25.2936	0.0158312	0.0357031	0.124763	0.025018
11	1	1	1	0.0786583	0.104725	0.444408	0.750108	0.0781219	4.00454	0.0434361	0.132267	0.649981	0.104147	0.0108467	1.06013	0.103128	0.13319	0.383924	1.03806	0.138295	4.49571	0.0797939	0.15622	0.828743	0.133225	0.0177489	0.903533	0.0687902	0.0897381	0.270594	0.752047	0.0671468	4.63156	0.0369223	0.104629	0.533343	0.0892854	0.00797189	0.945898	0.0854937	0.112413	0.20717	0.887378	0.0985196	4.50189	0.055491	0.139133	0.654286	0.111023
11	2	1	1	0.305675	0.369245	0.863545	0.402576	0.148791	0.55782	0.0761991	0.568384	1.67894	0.369596	0.136602	0.580615	0.272176	0.347426	0.661141	0.524666	0.182079	0.821349	0.0989194	0.462711	1.9923	0.347038	0.120435	0.824359	0.706624	0.778478	1.28413	0.170862	0.13297	0.110818	0.0671158	1.55346	2.42107	0.77823	0.605642	0.359221	0.326598	0.362649	0.581857	0.207297	0.0748652	0.298768	0.0389678	0.684017	1.26795	0.361149
11	3	1	1	1.48818	1.72675	4.48241	0.460862	0.796566	0.135402	0.404506	2.82036	6.52857	1.72843	2.98745	0.479918	1.83921	2.48214	6.31147	0.317777	0.789597	0.064854	0.400409	2.53992	11.7181	2.48476	6.17401	0.409388	0.371095	0.498014	0.885871	0.304862	0.151882	0.312314	0.0775169	0.528995	2.53698	0.498198	0.248201	0.431939	0.43266	0.590066	1.59837	0.321773	0.18995	0.277525	0.0967125	0.466235	3.01869	0.590323
11	4	1	1	0.0417164	0.0597078	0.145467	0.224881	0.0133963	2.16921	0.00769775	0.0498066	0.386129	0.0595705	0.00354865	0.643052	0.0313057	0.0458647	0.153877	0.545123	0.0249737	7.00416	0.0147006	0.0408414	0.332201	0.045813	0.00209883	0.971572	0.0116171	0.0142466	0.0471165	0.438257	0.00464552	23.2183	0.0026088	0.0151156	0.0652199	0.0106	0.00011236	0.956469	0.0120534	0.0148769	0.0382676	0.615181	0.00760095	28.5718	0.00436182	0.0175346	0.0796292	0.0123556
11	1	1	1	0.0759902	0.095268	0.346221	0.731264	0.0697045	4.26947	0.0387924	0.127136	0.610824	0.0953206	0.00908601	0.968545	0.0916649	0.114909	0.330765	0.78918	0.0907005	3.91936	0.0517705	0.154332	0.613052	0.11493	0.0132089	0.951721	0.0509287	0.062854	0.192801	0.871708	0.0538747	7.73315	0.0295382	0.0874489	0.340519	0.0618036	0.00381969	1.02196	0.0807294	0.109129	0.210599	0.68541	0.0748473	3.45847	0.0412415	0.105981	0.647695	0.109201
11	2	1	1	0.373665	0.448639	1.10404	0.433383	0.19458	0.499343	0.100659	0.691436	2.18034	0.448979	0.201582	0.590227	0.275271	0.369403	0.741062	0.594612	0.21987	0.883649	0.120822	0.396028	2.26287	0.369771	0.136731	0.855181	0.8476	0.941182	1.59393	0.190555	0.179526	0.102668	0.0911275	1.7918	3.16412	0.942123	0.887595	0.347604	0.347182	0.382197	0.591213	0.216414	0.0827327	0.295538	0.0431913	0.734534	1.35903	0.382288
11	3	1	1	1.41618	1.66009	4.59784	0.518876	0.862366	0.159158	0.439628	2.90178	6.75304	1.66199	2.76221	0.489851	1.99026	2.55838	6.28762	0.339338	0.868915	0.0673259	0.441439	3.3087	11.0481	2.56062	6.55675	0.403302	0.419801	0.531886	0.790973	0.325202	0.172969	0.310609	0.0878708	0.65316	2.45572	0.531882	0.282898	0.427628	0.411379	0.540725	1.44232	0.350032	0.189479	0.329754	0.0966265	0.586948	2.59698	0.541319
11	4	1	1	0.0287198	0.0445289	0.13478	0.247603	0.0106878	3.28936	0.00612879	0.0314779	0.197142	0.043165	0.00186321	0.731404	0.0110932	0.0136925	0.047344	1.11382	0.0144261	48.8328	0.00819182	0.0184262	0.0882466	0.0129519	0.000167753	1.10041	0.00858154	0.0101637	0.0280303	0.680098	0.00436511	59.6054	0.00245547	0.00722898	0.0559296	0.00641837	4.11954e-05	1.04122	0.0102438	0.0127315	0.0264606	1.20095	0.0129512	63.1334	0.00734219	0.0166927	0.0608176	0.0107841
11	1	1	1	0.0797405	0.104838	0.273388	0.569333	0.0593364	2.99735	0.0325572	0.100681	0.603663	0.104221	0.010862	0.817267	0.0984989	0.119206	0.355441	0.838094	0.100017	4.09628	0.0583375	0.172467	0.634662	0.119338	0.0142416	1.01816	0.0544053	0.0677233	0.180132	0.824237	0.0544713	6.81935	0.0297834	0.0972948	0.349464	0.066087	0.00436749	0.922501	0.083135	0.110612	0.177999	0.635985	0.0703785	3.11833	0.0381864	0.123891	0.554062	0.110661
11	2	1	1	0.346102	0.426192	1.29308	0.442564	0.188868	0.539974	0.0983415	0.632966	2.1124	0.426758	0.182123	0.571173	0.26663	0.367434	0.755535	0.664738	0.244568	0.989871	0.133992	0.39178	2.45893	0.367917	0.135363	0.767591	0.808143	0.895854	1.56529	0.19944	0.178883	0.112306	0.0903479	1.71011	2.85126	0.896929	0.804481	0.322604	0.357509	0.397822	0.590139	0.231619	0.0922103	0.301696	0.0478168	0.72455	1.43231	0.398112
11	3	1	1	1.62393	1.8693	4.32615	0.678352	1.26948	0.185524	0.649744	3.29179	6.97601	1.87142	3.5022	0.547114	2.44748	3.06543	6.88176	0.420908	1.29173	0.0697599	0.657014	4.14566	13.1808	3.06891	9.41822	0.437594	0.540816	0.649503	1.13725	0.401077	0.260755	0.312451	0.132066	0.944074	2.68324	0.650136	0.422677	0.430745	0.462157	0.572119	1.2711	0.422499	0.241978	0.376859	0.123617	0.807647	2.34428	0.572731
11	4	1	1	0.0367931	0.0533602	0.16232	0.275435	0.014252	3.08321	0.00825502	0.046094	0.29428	0.0517437	0.00267741	0.683379	0.023496	0.0352816	0.180382	0.568455	0.0199851	9.4113	0.0116324	0.0314784	0.256868	0.0351568	0.001236	0.998572	0.00699785	0.0113714	0.0186241	0.363666	0.00412145	18.2196	0.00234009	0.0088888	0.0801997	0.0113331	0.000128438	0.81882	0.00781422	0.0116935	0.0193238	0.732828	0.00849122	35.9983	0.00483301	0.0109024	0.0904187	0.0115869
11	1	1	1	0.0569492	0.0761471	0.29348	0.70087	0.0534242	5.11192	0.029702	0.0819469	0.479921	0.0762256	0.00581034	0.96908	0.0782663	0.102323	0.354454	0.967548	0.0989027	5.48002	0.0572602	0.124089	0.820176	0.10222	0.0104489	0.989196	0.0417551	0.0529186	0.226297	0.953047	0.0504059	9.96083	0.0278631	0.0683307	0.344409	0.0528892	0.00279727	0.923346	0.0669408	0.0935135	0.131805	0.719378	0.0672452	4.26197	0.0372408	0.081146	0.496107	0.0934769
11	2	1	1	0.302371	0.356551	0.738893	0.360078	0.128425	0.52465	0.0667389	0.574216	1.44596	0.35666	0.127207	0.628078	0.218647	0.276313	0.577828	0.617391	0.17076	1.22031	0.0933511	0.358787	1.60759	0.276583	0.0764981	0.893667	0.634312	0.711741	1.15138	0.1605	0.114362	0.113436	0.0575927	1.38182	2.30356	0.712538	0.507711	0.349109	0.315494	0.351913	0.603676	0.20001	0.0704518	0.297156	0.0368694	0.640291	1.39256	0.352241
11	3	1	1	1.16668	1.36637	3.62716	0.509911	0.697014	0.190803	0.356516	2.25607	5.49863	1.36693	1.8685	0.57568	1.7377	2.17868	5.33901	0.324089	0.70682	0.0755705	0.359453	2.8217	9.7651	2.18095	4.75653	0.486818	0.425668	0.529112	1.35244	0.29238	0.154774	0.280429	0.0785816	0.660884	2.7541	0.529358	0.280219	0.455882	0.332219	0.424557	1.01365	0.318631	0.135393	0.382133	0.0689973	0.520779	2.06665	0.424922
11	4	1	1	0.0676521	0.0806006	0.0918185	0.171476	0.0137171	1.217	0.00778775	0.0829632	0.306143	0.0799945	0.00639913	0.371772	0.0382243	0.0526606	0.0349518	0.607738	0.0281979	7.57309	0.0163033	0.0659388	0.175844	0.0463982	0.00215279	0.531722	0.0139819	0.0155064	0.0283629	0.755454	0.00536926	60.6095	0.00306163	0.00997212	0.0318155	0.00710732	5.05141e-05	0.458926	0.0130154	0.0157903	0.0353874	0.979213	0.00977024	56.3213	0.00560697	0.0149551	0.0439408	0.00997764
11	1	1	1	0.0944553	0.132792	0.477664	0.553938	0.0734596	2.22581	0.0391439	0.124659	0.756	0.132613	0.0175863	0.775151	0.102345	0.144675	0.612586	0.924842	0.133945	3.60428	0.0756028	0.141894	1.08324	0.14483	0.0209759	0.918988	0.068088	0.0897118	0.264163	0.705717	0.062295	4.32787	0.0337224	0.106753	0.568478	0.0882719	0.00779193	0.838996	0.11185	0.155624	0.350663	0.607303	0.0946101	2.10917	0.0511888	0.152045	0.977966	0.155787
11	2	1	1	0.363716	0.447618	1.25227	0.448365	0.200924	0.513553	0.10313	0.653465	2.18599	0.448127	0.200817	0.544438	0.353396	0.461615	1.07334	0.517994	0.239276	0.599023	0.127818	0.564151	2.86634	0.461928	0.213378	0.74679	0.845872	0.929676	1.64895	0.194007	0.180138	0.105381	0.0908532	1.83835	3.08837	0.928513	0.862136	0.344012	0.438919	0.485368	0.720523	0.215919	0.104766	0.228871	0.0538822	0.927621	1.69799	0.485208
11	3	1	1	1.44768	1.69388	4.34898	0.457512	0.775779	0.138833	0.399178	2.74308	6.22577	1.69565	2.87523	0.465779	1.79092	2.43108	6.04819	0.321976	0.783566	0.0679752	0.402583	2.14603	11.9407	2.43362	5.9225	0.410505	0.330114	0.441827	1.05658	0.295006	0.130462	0.342363	0.0669563	0.443782	2.39248	0.442234	0.195571	0.457456	0.408397	0.553189	1.59329	0.326665	0.180887	0.302851	0.0928626	0.464276	2.83905	0.55374
11	4	1	1	0.0267706	0.0410654	0.119333	0.338753	0.0134733	4.91427	0.00777391	0.0295882	0.286626	0.0397732	0.00158191	0.813167	0.0204579	0.0292612	0.13306	0.763313	0.0219335	14.9901	0.0123769	0.0307184	0.208884	0.0287346	0.000825676	0.927785	0.00805456	0.0100401	0.0391383	0.678582	0.00597383	43.6577	0.00338347	0.0109503	0.0637743	0.0088034	7.74998e-05	0.914877	0.0116374	0.0142943	0.0385449	0.813777	0.0112489	32.7077	0.00624964	0.0188531	0.0959299	0.013823
12	1	1	1	0.166907	0.222281	0.892438	1.11101	0.247182	3.06133	0.151532	0.255789	1.48046	0.222483	0.0494989	1.00669	0.27858	0.338301	0.941308	1.21656	0.411942	2.06491	0.23676	0.505289	1.54215	0.338613	0.114659	0.910322	0.488612	0.582815	1.09217	1.00504	0.586515	0.965152	0.328688	0.891192	2.56937	0.583571	0.340555	0.886907	0.101294	0.127828	0.38781	1.03243	0.132142	4.58817	0.0751623	0.167475	0.779608	0.127991
12	2	1	1	0.411509	0.479302	0.909632	0.472518	0.226717	0.523652	0.120552	0.8018	1.90003	0.479805	0.230213	0.790837	0.34083	0.443817	1.64658	0.676172	0.300294	0.838565	0.165393	0.51953	2.90449	0.444109	0.197233	0.890371	0.55914	0.656886	1.18205	0.321189	0.211116	0.255727	0.110484	1.03166	2.64984	0.657296	0.432038	0.660157	0.777185	0.8683	1.38952	0.217867	0.189293	0.128047	0.0966622	1.7364	2.83503	0.868848
12	3	1	1	1.61227	1.80464	3.87938	0.594667	1.07435	0.168092	0.548643	3.38261	6.77345	1.80664	3.26394	0.587429	2.73834	3.28844	6.85326	0.346692	1.14125	0.0530671	0.575043	5.50264	12.8479	3.29183	10.8361	0.449845	0.229736	0.29934	0.798214	0.594112	0.178027	1.06402	0.0955396	0.339608	1.55832	0.299651	0.089791	0.864546	0.402794	0.503019	1.15693	0.40478	0.203836	0.411058	0.104238	0.66142	2.25905	0.503573
12	4	1	1	0.024658	0.0283936	0.0510672	0.54456	0.0137694	12.6056	0.00805935	0.029448	0.0987966	0.0252853	0.000639346	0.611229	0.0178803	0.0213367	0.0410965	0.962426	0.0205657	27.7652	0.012678	0.0355025	0.106592	0.0213686	0.000456615	0.523444	0.0156763	0.019316	0.0420339	1.31052	0.0253195	39.0974	0.0145939	0.0266446	0.0828654	0.0193202	0.00037327	0.415076	0.010729	0.0147902	0.0634205	0.801975	0.0109438	34.6333	0.00644928	0.0171135	0.0821557	0.0136461
12	1	1	1	0.169743	0.215318	0.649474	1.11823	0.240781	3.11799	0.144565	0.275269	1.23359	0.215325	0.0463646	1.07812	0.413725	0.492707	1.24586	1.02427	0.505171	1.15674	0.281374	0.732837	2.05899	0.493201	0.243247	0.918027	0.357844	0.433782	0.896115	1.11996	0.486305	1.45874	0.275034	0.641032	2.00838	0.434215	0.188542	0.998086	0.203012	0.239941	0.561497	0.927813	0.222846	2.06573	0.119169	0.37501	1.17415	0.240184
12	2	1	1	0.4254	0.493053	1.32229	0.502571	0.247592	0.553002	0.134217	0.851527	2.36669	0.492652	0.242706	0.837041	0.476251	0.611256	1.72488	0.610789	0.3738	0.550667	0.206245	0.766031	3.61308	0.611995	0.374538	0.810872	0.537707	0.625898	1.28089	0.363401	0.227729	0.311117	0.122177	1.02235	2.48361	0.626661	0.392704	0.770207	0.826479	0.93694	1.60363	0.224508	0.210612	0.123178	0.108402	1.71602	3.13926	0.938106
12	3	1	1	1.51168	1.6974	3.62592	0.566835	0.963253	0.17004	0.491042	3.15716	6.43307	1.69935	2.8878	0.527949	2.69515	3.18327	6.52264	0.316828	1.00965	0.0501626	0.509421	5.64088	12.1748	3.18675	10.1554	0.39533	0.325458	0.428059	1.29649	0.548699	0.23514	0.680444	0.124962	0.447521	2.30607	0.428541	0.183647	0.771555	0.518024	0.623945	1.25598	0.348032	0.217352	0.283675	0.11064	0.925938	2.53833	0.624518
12	4	1	1	0.0358434	0.0542689	0.182504	0.321661	0.0166867	3.62897	0.00976625	0.0467552	0.248721	0.0518767	0.00269119	0.835643	0.0237477	0.0299559	0.0888487	1.04579	0.0313682	21.0079	0.0189005	0.0379619	0.172921	0.0299947	0.000899683	1.01248	0.0182803	0.0232366	0.0702847	1.13322	0.0263668	28.9917	0.015695	0.0289764	0.129163	0.0232672	0.000541362	0.852039	0.0139826	0.0171711	0.0388818	0.762644	0.0130243	25.9978	0.00758233	0.0237478	0.0993745	0.0170778
12	1	1	1	0.155646	0.195097	0.512924	1.19002	0.232624	3.71597	0.141996	0.271877	1.08125	0.19548	0.0382123	0.779094	0.419334	0.495519	1.16269	1.05109	0.521852	1.1634	0.286775	0.822888	2.05456	0.496484	0.246497	0.712265	0.279809	0.354031	0.688414	1.14536	0.406283	1.89231	0.238103	0.447861	1.84272	0.35472	0.125826	0.7966	0.163721	0.193102	0.468256	1.00507	0.19432	2.78732	0.104191	0.312894	0.92182	0.193339
12	2	1	1	0.397044	0.476867	1.3791	0.519511	0.247961	0.58101	0.132361	0.736214	2.37715	0.477297	0.227812	0.822853	0.415261	0.549441	1.54908	0.568793	0.312859	0.57093	0.172731	0.587499	3.31945	0.550039	0.302543	0.879068	0.515731	0.604218	1.20126	0.374948	0.226759	0.332285	0.121534	1.00993	2.45874	0.604775	0.365753	0.792454	0.854921	0.949096	1.41532	0.235918	0.22416	0.126569	0.114268	1.82642	3.28356	0.950162
12	3	1	1	1.39705	1.58561	2.9036	0.695457	1.10388	0.225095	0.567116	2.78727	5.8789	1.58728	2.51945	0.617872	2.78621	3.22554	6.04471	0.378679	1.22272	0.0591328	0.616512	5.94751	11.5745	3.22891	10.4259	0.419572	0.367407	0.463523	1.64061	0.487951	0.226322	0.560993	0.120686	0.612611	2.67681	0.463821	0.21513	0.76992	0.390365	0.475587	1.22065	0.414716	0.197431	0.442465	0.100279	0.704796	2.51193	0.476064
12	4	1	1	0.0512589	0.0644612	0.168919	0.251162	0.0148429	2.50176	0.0087373	0.0868199	0.248631	0.059097	0.00349246	0.757813	0.0303395	0.0385103	0.127665	0.997494	0.0374031	16.0196	0.0225241	0.0523696	0.207355	0.037497	0.00140603	0.950824	0.0242131	0.0288032	0.0667412	1.47214	0.0424347	30.5377	0.0253733	0.0451481	0.148817	0.0288251	0.000830884	0.813811	0.0152305	0.0198414	0.0618526	0.818667	0.0161443	24.4227	0.00949768	0.0250198	0.0982992	0.0197202
12	1	1	1	0.133646	0.173659	0.705044	1.03845	0.179935	3.48421	0.104608	0.211952	1.1444	0.173272	0.0300233	1.04885	0.308554	0.368813	0.908716	1.22182	0.451132	1.91877	0.261588	0.571949	1.87615	0.36923	0.136331	0.948901	0.287011	0.353143	0.966232	1.1844	0.418676	1.93929	0.242327	0.489965	2.10051	0.353491	0.124956	0.940161	0.0915313	0.115237	0.423445	1.02966	0.118789	4.916	0.0654303	0.152151	0.822294	0.115368
12	2	1	1	0.404145	0.4724	0.985111	0.504566	0.238617	0.569678	0.127408	0.776111	2.04667	0.472916	0.22365	0.865435	0.27766	0.35921	1.43131	0.756901	0.272181	1.17753	0.152269	0.435988	2.67928	0.3596	0.129312	0.930505	0.675802	0.757726	1.3973	0.322147	0.244332	0.225819	0.129902	1.31705	2.80328	0.758451	0.575248	0.649831	0.806273	0.899631	1.51298	0.23472	0.211348	0.132497	0.107424	1.73957	3.17056	0.900425
12	3	1	1	1.5094	1.70718	3.13677	0.713931	1.21999	0.21513	0.628204	3.16691	6.11453	1.70884	2.92012	0.626379	2.67664	3.16714	5.96295	0.410701	1.3021	0.0653999	0.657374	5.42618	11.8851	3.17043	10.0516	0.466812	0.404895	0.512743	1.26919	0.503161	0.258246	0.508822	0.134035	0.644528	2.87376	0.513247	0.263423	0.789941	0.59545	0.722761	1.80203	0.419295	0.303303	0.293845	0.153757	1.08353	3.54364	0.723365
12	4	1	1	0.0274471	0.0354814	0.0896949	0.418123	0.0146193	7.15092	0.00874194	0.0477303	0.16228	0.0349641	0.00122249	0.951494	0.0256498	0.0311497	0.0758714	1.12674	0.0351342	21.3822	0.0207906	0.0454549	0.169495	0.0311823	0.000972334	0.9767	0.0210788	0.0258156	0.0652194	1.2228	0.0315044	27.5571	0.018292	0.0370074	0.124128	0.025764	0.000663786	0.860299	0.0137177	0.0171298	0.0660382	1.05235	0.0178584	35.8969	0.0103376	0.024119	0.0995236	0.01697
12	1	1	1	0.138714	0.182144	0.64999	1.04704	0.190769	3.42398	0.113662	0.225982	1.33138	0.182198	0.033196	1.0277	0.307481	0.371198	1.00864	1.16732	0.433763	1.83241	0.253018	0.56343	1.64614	0.37159	0.138079	1.0197	0.284107	0.373508	0.927761	1.08392	0.405322	1.67303	0.233943	0.442953	2.3734	0.373941	0.139832	0.954053	0.123215	0.145447	0.383988	1.05636	0.153822	4.04024	0.0856689	0.231481	0.700084	0.145616
12	2	1	1	0.364721	0.43227	1.48584	0.571819	0.247382	0.721454	0.135029	0.706866	2.41296	0.432622	0.187162	0.864867	0.390832	0.525248	2.47649	0.593232	0.31197	0.625394	0.172954	0.597124	3.74729	0.525882	0.276551	0.895664	0.559738	0.640638	1.20314	0.372394	0.23883	0.317383	0.130544	1.10596	2.39188	0.641338	0.411314	0.775117	0.705797	0.792151	1.31485	0.250065	0.198334	0.163109	0.102605	1.50106	2.76497	0.793132
12	3	1	1	1.40344	1.58716	2.76396	0.794042	1.26162	0.260292	0.657095	2.82047	5.75714	1.58885	2.52446	0.685758	2.75316	3.1875	5.67791	0.447062	1.4266	0.07059	0.718806	5.87657	11.1161	3.19105	10.1828	0.490529	0.283055	0.356247	1.15081	0.538385	0.19195	0.812728	0.103309	0.467189	2.31508	0.35653	0.127113	0.846074	0.55011	0.688384	1.88189	0.418529	0.288428	0.307549	0.146062	0.938159	3.71567	0.689147
12	4	1	1	0.0476758	0.0696988	0.192374	0.225329	0.0155204	1.88564	0.00894607	0.0628564	0.478775	0.068879	0.00474432	0.687077	0.0321671	0.0436607	0.120298	0.623039	0.0271253	8.63267	0.016363	0.048559	0.316775	0.043537	0.00189547	1.13426	0.0237409	0.0287778	0.0863165	1.24082	0.0356818	25.7375	0.0212834	0.0432354	0.155429	0.0287566	0.000826941	0.982805	0.0125063	0.0154298	0.0500749	0.99003	0.015274	37.9672	0.00903684	0.0204837	0.100275	0.0154278
13	1	1	1	0.0646919	0.0835877	0.38313	0.930668	0.0775409	6.33073	0.0439467	0.094876	0.641364	0.0833175	0.0069418	1.09546	0.0799754	0.102836	0.464604	0.82542	0.0849235	4.41352	0.0467188	0.133194	0.757047	0.102885	0.0105854	1.07447	0.0638602	0.0812829	0.284236	0.90298	0.0734296	6.10923	0.0403992	0.105268	0.457963	0.0813192	0.00661281	1.0273	0.029934	0.0382539	0.148999	0.724884	0.0277418	10.2282	0.0149807	0.0515003	0.297023	0.0382707
13	2	1	1	0.198489	0.232714	0.866323	0.339988	0.0791213	0.792659	0.0429286	0.380477	1.22405	0.232718	0.0541577	0.803728	0.134354	0.182378	0.718223	0.715363	0.13045	2.16206	0.0718959	0.204341	1.82733	0.182355	0.0332534	0.98512	0.24232	0.299514	0.692059	0.203895	0.061092	0.3577	0.0321127	0.42014	1.41634	0.299626	0.0897755	0.590029	0.186266	0.233535	0.578489	0.23589	0.0551103	0.536555	0.029286	0.288868	1.05307	0.233627
13	3	1	1	0.360989	0.464738	2.0044	0.611389	0.284301	0.723418	0.156427	0.569466	2.779	0.465009	0.216233	1.08184	0.599594	0.778101	2.74442	0.403705	0.314293	0.283198	0.171645	0.954434	4.58988	0.778522	0.606096	0.899095	0.0611043	0.0761673	0.194889	0.789451	0.0601669	5.7278	0.03327	0.104145	0.465959	0.0762136	0.00580852	1.10023	0.0604847	0.0818056	0.241232	0.534734	0.0437275	3.60136	0.0240825	0.0853621	0.595285	0.0817744
13	4	1	1	0.0210027	0.0292049	0.152431	0.795116	0.0231817	16.1338	0.013714	0.0284984	0.25842	0.0291551	0.000850021	1.17606	0.0408228	0.059637	0.297536	0.956874	0.0570898	9.02936	0.0321413	0.055554	0.600715	0.0596628	0.00355964	0.909105	0.0214288	0.029536	0.0994275	0.735465	0.0217288	13.5351	0.0118144	0.0284467	0.199299	0.0295443	0.000872868	0.873602	0.0206537	0.0274382	0.106498	0.809763	0.0222026	16.0447	0.0120621	0.0308033	0.209633	0.0274186
13	1	1	1	0.0700755	0.101647	0.668523	0.830175	0.0844303	4.71519	0.0487704	0.0937048	0.883343	0.101702	0.0103432	1.01608	0.101099	0.145042	0.714577	0.750486	0.108846	2.88822	0.060753	0.137046	1.29729	0.145034	0.0210348	0.958538	0.0570876	0.0771882	0.338939	0.83244	0.0642896	6.0174	0.0358909	0.0828518	0.586514	0.0772304	0.00596453	1.02974	0.0360486	0.0473439	0.300087	0.77226	0.0365717	8.90142	0.0199629	0.0611224	0.464886	0.0473567
13	2	1	1	0.204432	0.237709	0.773644	0.357283	0.0849719	0.820715	0.0464214	0.394484	1.15185	0.237828	0.0565622	0.854172	0.143889	0.185029	0.590367	0.946582	0.175186	2.86312	0.0980669	0.240513	1.70113	0.185072	0.0342517	1.1111	0.29401	0.362604	0.74702	0.207186	0.075131	0.302274	0.0397483	0.510777	1.62951	0.362626	0.131498	0.597019	0.174563	0.214284	0.60052	0.238399	0.0510787	0.597915	0.027448	0.300832	0.97249	0.214257
13	3	1	1	0.400732	0.505263	2.06104	0.894283	0.452092	1.00281	0.256283	0.670139	2.9029	0.505535	0.255566	1.20932	0.71551	0.898755	2.71062	0.719098	0.64665	0.445734	0.360445	1.23916	5.79011	0.899252	0.808654	1.16501	0.103455	0.13265	0.58134	0.929873	0.123418	3.84522	0.0677378	0.165367	1.03158	0.132726	0.0176161	1.05843	0.104769	0.140539	0.778813	0.821361	0.115499	3.21314	0.0635356	0.160998	1.5305	0.140619
13	4	1	1	0.0181777	0.0315615	0.365977	0.697412	0.0220028	12.9915	0.0129311	0.0253984	0.55189	0.0315492	0.000995351	1.10951	0.0355509	0.063501	0.296249	0.760327	0.0483047	6.94376	0.0280268	0.0422066	0.947508	0.0635315	0.00403625	0.83479	0.0253304	0.0390056	0.187988	0.801572	0.031281	11.5101	0.0175289	0.0274465	0.349812	0.0390246	0.00152292	0.750854	0.0158474	0.0225448	0.0988897	0.812798	0.0183251	19.901	0.0101158	0.0225209	0.195903	0.0225457
13	1	1	1	0.0962201	0.139524	1.04998	0.832761	0.116246	3.44078	0.0670459	0.130333	1.48091	0.139591	0.0194857	1.09162	0.137603	0.195567	1.11658	0.832987	0.162888	2.37415	0.090784	0.197962	1.96066	0.195547	0.0382385	1.04459	0.0920815	0.12696	0.630834	0.816509	0.103659	3.5477	0.0571799	0.137793	1.34555	0.126955	0.0161175	1.09995	0.0703488	0.0896358	0.235841	0.758533	0.0679841	4.55808	0.0366139	0.115211	0.547778	0.0896257
13	2	1	1	0.151094	0.179414	0.591186	0.389555	0.0699254	1.19972	0.0386554	0.290036	0.940126	0.179501	0.0322205	0.975081	0.118592	0.153682	0.490793	1.01005	0.155304	3.67759	0.0869446	0.191966	1.20465	0.153759	0.0236417	1.14941	0.249341	0.303205	0.609205	0.237663	0.0720891	0.425116	0.039113	0.452593	1.29281	0.303324	0.0920056	0.694174	0.106432	0.130859	0.387184	0.306104	0.0400764	1.26514	0.021686	0.170324	0.651232	0.130924
13	3	1	1	0.481219	0.596119	2.34815	0.575927	0.343509	0.529657	0.188424	0.80457	3.41699	0.596445	0.355747	1.09584	0.829589	1.03775	3.27358	0.366194	0.380205	0.191584	0.206524	1.39042	5.82489	1.03826	1.07799	0.836363	0.0853879	0.111124	0.429794	0.56916	0.0632816	2.82258	0.0348924	0.131413	0.735303	0.111184	0.0123619	1.02961	0.0459899	0.0562704	0.21635	0.68916	0.0387911	6.72104	0.0212942	0.0821987	0.396501	0.0562875
13	4	1	1	0.0151545	0.0223817	0.132122	0.804672	0.0180097	20.5975	0.0103179	0.021492	0.241856	0.0223814	0.000500929	1.16876	0.0276613	0.0393241	0.209298	1.05255	0.0413145	15.1832	0.0233927	0.0416256	0.440905	0.0392517	0.0015407	0.982258	0.010971	0.0163607	0.091071	0.890326	0.0145718	30.5445	0.00818204	0.0144606	0.173848	0.0163668	0.000267873	1.02357	0.0112568	0.0150325	0.0546238	0.992616	0.0149176	37.6001	0.00849223	0.0174928	0.125198	0.0150285
13	1	1	1	0.0760927	0.104034	0.518798	0.989694	0.102904	5.48276	0.059274	0.10768	0.761636	0.103976	0.010811	1.05232	0.116746	0.148355	0.603525	0.806718	0.119741	2.96467	0.0653162	0.19745	0.967911	0.14843	0.0220315	1.00448	0.0667847	0.0862025	0.288417	0.917077	0.0790912	5.86557	0.0436269	0.0995353	0.47218	0.0862427	0.0074378	0.990234	0.0364826	0.0439915	0.131369	0.812331	0.0357525	9.92248	0.0192206	0.0677586	0.251835	0.0440122
13	2	1	1	0.182657	0.216666	0.79419	0.340972	0.073853	0.863602	0.0405149	0.342589	1.15322	0.216596	0.0469138	0.809645	0.131932	0.190707	0.820035	0.949629	0.181171	2.803	0.102022	0.180143	2.02245	0.190781	0.0363973	1.02042	0.229907	0.283033	0.572572	0.19211	0.0544002	0.36076	0.0289279	0.385483	1.24979	0.283172	0.0801862	0.574924	0.171778	0.2171	0.583692	0.226306	0.0491544	0.556908	0.0262734	0.265745	1.02958	0.217203
13	3	1	1	0.366515	0.456656	1.71172	0.605488	0.276555	0.735431	0.153424	0.626506	2.45294	0.456747	0.208618	1.06747	0.640444	0.795944	2.45976	0.369589	0.294131	0.256343	0.162355	1.11294	4.33767	0.795832	0.633349	0.855243	0.0549902	0.0716294	0.266531	0.840452	0.0602184	6.54998	0.0336258	0.0864332	0.449853	0.0716501	0.00513373	1.04788	0.0661602	0.0857561	0.363071	0.475924	0.0408268	3.07072	0.0225973	0.102108	0.671285	0.0857843
13	4	1	1	0.0124035	0.0196915	0.217364	0.869668	0.0170693	26.0071	0.0100188	0.019099	0.261976	0.0196274	0.000385233	1.10621	0.0207748	0.0298293	0.252069	1.08246	0.0322461	20.9237	0.0185684	0.0336941	0.404491	0.0297898	0.000887433	0.9962	0.0085887	0.012879	0.0659487	0.91095	0.0117267	40.1478	0.00665305	0.011325	0.138432	0.012873	0.000165714	0.934626	0.00950835	0.0147054	0.0764221	0.81577	0.0119905	30.9789	0.0066927	0.0136322	0.178788	0.0146983
13	1	1	1	0.0586154	0.0766813	0.359838	0.96055	0.0736819	7.18841	0.0422975	0.0913451	0.621741	0.076708	0.00588412	1.23032	0.0987088	0.122371	0.418718	0.826629	0.101196	3.61311	0.0541487	0.172655	0.771766	0.12242	0.0149867	0.963866	0.0693379	0.0897067	0.321466	1.0061	0.090302	6.30084	0.0507591	0.104497	0.541391	0.0897548	0.00805592	1.10371	0.0301358	0.0368034	0.107809	0.883828	0.0325377	13.2472	0.0179541	0.0534016	0.20291	0.0368145
13	2	1	1	0.186926	0.225392	1.13444	0.35136	0.0792337	0.858151	0.0436393	0.344162	1.50353	0.225506	0.0508528	0.840045	0.140435	0.204277	0.9831	0.903352	0.184409	2.50195	0.104263	0.197839	2.5086	0.204138	0.0416725	1.07704	0.244178	0.297554	0.674435	0.208519	0.062078	0.379166	0.0336059	0.417009	1.43563	0.29771	0.0886311	0.640674	0.165537	0.206186	0.604649	0.254218	0.0524436	0.663526	0.0282377	0.250157	1.00249	0.206294
13	3	1	1	0.358426	0.445777	1.52486	0.837662	0.373618	1.07022	0.212906	0.600905	2.32202	0.446024	0.198938	1.17674	0.638149	0.799925	2.35441	0.639766	0.512037	0.452272	0.289708	1.04838	4.57947	0.800351	0.640562	1.14192	0.0907958	0.112806	0.35996	1.01522	0.11458	5.06316	0.0644945	0.153593	0.701212	0.112863	0.012738	1.15226	0.0710033	0.0949358	0.3328	0.855827	0.0812906	5.06724	0.0457172	0.107111	0.704866	0.0949848
13	4	1	1	0.0135924	0.0209464	0.200607	0.889609	0.0186281	24.4799	0.0107337	0.0212718	0.259368	0.0209397	0.000438471	1.1174	0.0246548	0.0374485	0.276404	1.00684	0.0377282	15.2463	0.0214082	0.0362553	0.48302	0.037472	0.00140415	0.840425	0.00803273	0.013046	0.087841	0.84145	0.0109794	36.826	0.00626982	0.0100548	0.156749	0.0130482	0.000170255	0.889486	0.0105199	0.0152425	0.0670349	0.934165	0.0142353	34.6251	0.00804037	0.0147862	0.155938	0.0152385
14	1	1	1	0.211403	0.302448	1.71594	0.867313	0.262477	1.63227	0.149494	0.299713	2.36029	0.302632	0.0915862	1.12694	0.195152	0.255508	0.982089	0.953097	0.243672	2.05289	0.134184	0.317201	2.29978	0.255663	0.0653635	1.07514	0.394486	0.530654	1.748	0.845989	0.449144	0.86864	0.24484	0.622063	4.1178	0.53091	0.281865	0.987653	0.102746	0.130221	0.431108	0.924759	0.120497	3.97443	0.0674791	0.168674	0.816751	0.130301
14	2	1	1	0.669761	0.87396	3.94855	0.976949	0.854092	0.693414	0.529979	1.07733	6.36412	0.874245	0.764304	1.30345	1.02866	1.33765	4.87235	0.888931	1.18963	0.357699	0.640623	1.62673	10.8519	1.33827	1.79096	0.83585	1.21021	1.52126	4.95656	0.979205	1.49043	0.34356	0.795931	1.99173	8.49332	1.52208	2.31672	0.639685	0.846177	1.09994	3.86901	0.661606	0.727839	0.321332	0.388888	1.31627	7.53556	1.10011
14	3	1	1	0.944662	1.13525	4.25787	0.618946	0.702976	0.297953	0.384346	1.71159	6.48276	1.13576	1.28996	1.06806	1.71082	2.07946	4.49588	0.389698	0.810787	0.0993633	0.430113	3.13124	10.9087	2.08055	4.32869	0.811678	0.709132	0.898208	2.95172	0.80372	0.722286	0.482706	0.389845	1.13237	5.19243	0.898679	0.807623	1.02793	0.294621	0.390096	1.33222	0.640441	0.24996	0.877976	0.133741	0.442887	2.79228	0.390293
14	4	1	1	0.433376	0.540894	2.26928	1.2605	0.682117	1.46811	0.429925	0.757321	3.41763	0.541149	0.292842	1.37757	0.422005	0.546312	2.43134	0.942397	0.515083	0.933499	0.27887	0.703909	4.65464	0.546567	0.298736	0.970457	1.08673	1.32147	3.73508	1.00841	1.33322	0.403142	0.704677	1.94526	6.30855	1.32211	1.74796	0.581918	0.2474	0.301303	0.941335	0.95892	0.289062	1.69379	0.153914	0.429771	1.65836	0.301446
14	1	1	1	0.105576	0.131374	0.488848	1.3107	0.172286	6.21001	0.107295	0.180621	0.863499	0.131445	0.0172778	1.30106	0.103154	0.126003	0.344613	1.09235	0.137717	4.88009	0.0775674	0.183548	0.733749	0.126074	0.0158947	1.24005	0.304159	0.357746	0.953359	1.06677	0.381844	1.60357	0.205457	0.565491	1.78587	0.357945	0.128125	0.831772	0.0957606	0.12124	0.354789	1.27384	0.154488	6.31592	0.092895	0.156196	0.746307	0.121277
14	2	1	1	0.571958	0.720336	2.73872	0.424462	0.305892	0.334277	0.173606	0.902759	3.79805	0.720659	0.519349	0.977663	0.599906	0.814605	2.0429	0.558328	0.455012	0.368448	0.244705	0.85514	4.79535	0.814954	0.664151	0.875457	0.385764	0.506748	2.18121	0.793051	0.40207	0.85084	0.2187	0.615397	3.70011	0.506991	0.25704	0.940998	0.650501	0.869948	2.63867	0.303133	0.263795	0.184765	0.139923	0.910033	5.10966	0.87023
14	3	1	1	0.468431	0.569652	1.84807	0.751353	0.428236	0.744417	0.241821	0.808184	2.77485	0.569953	0.324847	1.2029	0.892744	1.07842	2.57151	0.565486	0.60979	0.284287	0.330578	1.59785	5.36058	1.07835	1.16283	0.983165	0.325083	0.390559	1.2057	0.923099	0.36066	1.27507	0.194641	0.593577	2.20729	0.390706	0.152651	1.05689	0.128374	0.155825	0.417937	0.850637	0.132612	2.95113	0.0717246	0.230056	0.7852	0.155898
14	4	1	1	0.195711	0.236366	0.8428	1.40338	0.331868	3.78967	0.211923	0.354202	1.33405	0.236477	0.0559213	1.31317	0.203815	0.253501	0.736886	1.01929	0.25853	2.16055	0.138991	0.340656	1.38228	0.253636	0.0643313	0.834351	0.505922	0.593861	1.48511	1.05645	0.627731	0.94644	0.334152	0.934574	2.74561	0.59419	0.353062	0.511667	0.158582	0.184045	0.467726	1.07777	0.198466	3.11805	0.105731	0.317313	0.914276	0.184145
14	1	1	1	0.174883	0.222715	0.823795	0.908702	0.202487	2.2307	0.110762	0.282265	1.25685	0.222831	0.0496536	1.03166	0.138282	0.177254	0.558838	0.988313	0.175279	3.12786	0.098383	0.220717	1.23737	0.177352	0.0314538	1.21411	0.323524	0.403686	0.69519	0.645614	0.26077	0.852565	0.13909	0.501064	1.85145	0.40391	0.163143	0.86515	0.115106	0.143119	0.301811	0.793441	0.113616	2.92817	0.0600409	0.185886	0.749514	0.143194
14	2	1	1	0.318143	0.377937	1.04371	0.260362	0.0984369	0.361366	0.0516546	0.59983	1.76206	0.378077	0.142942	0.647819	0.174683	0.23581	1.13764	0.595038	0.140378	1.33896	0.0745212	0.264475	2.08817	0.235915	0.0556558	0.832478	0.174552	0.228074	0.577497	0.306929	0.0700323	0.716009	0.0372768	0.279913	1.22779	0.228171	0.0520619	0.697322	0.55279	0.672644	1.6753	0.130153	0.0875891	0.0985532	0.0446335	1.12975	3.15082	0.672969
14	3	1	1	0.595662	0.698266	1.56183	0.346635	0.242132	0.253408	0.123646	1.18311	2.78409	0.698522	0.487933	0.638282	1.13396	1.33804	2.53673	0.188983	0.252986	0.0717944	0.128658	2.29629	5.33567	1.33867	1.79203	0.532205	0.174516	0.203832	0.493176	0.345922	0.0705428	0.89552	0.0372413	0.329336	1.00802	0.203927	0.0415863	0.732666	0.101003	0.123349	0.336589	0.324932	0.0400779	1.35192	0.0205672	0.167598	0.726769	0.123342
14	4	1	1	0.0305057	0.0416656	0.205731	1.22907	0.0512181	19.713	0.0342333	0.0423966	0.332134	0.0416724	0.00173659	0.994058	0.0611703	0.0802732	0.243675	1.00643	0.0808311	6.79116	0.0438057	0.0913311	0.484038	0.0803144	0.0064504	0.615311	0.0663768	0.0936146	0.390755	0.944007	0.0884199	5.41566	0.0475117	0.0892613	0.698723	0.0936644	0.00877303	0.350449	0.0506574	0.068983	0.223532	0.97981	0.0676267	7.61201	0.036262	0.0716242	0.42138	0.0690202
14	1	1	1	0.1394	0.180911	0.704771	1.15956	0.209891	3.87529	0.126971	0.217207	1.17637	0.181009	0.0327643	1.26343	0.135063	0.179384	0.758122	1.0732	0.192601	3.50626	0.112928	0.203965	1.49583	0.179465	0.0322076	1.22673	0.356481	0.443966	1.01644	1.01132	0.449225	1.25004	0.246646	0.597459	2.35943	0.444196	0.19731	0.955476	0.102052	0.130342	0.433071	1.08249	0.141167	4.70006	0.0799328	0.168393	0.789474	0.13041
14	2	1	1	0.679665	0.812688	3.01758	0.293341	0.238513	0.188395	0.124551	1.28427	4.08578	0.81309	0.661115	0.602923	0.610473	0.882527	3.1345	0.276004	0.243658	0.166073	0.129429	0.661296	6.30928	0.882806	0.779346	0.640503	0.280994	0.375516	1.97184	0.386607	0.145235	0.545388	0.0769679	0.450897	2.97547	0.375666	0.141125	0.759534	0.630054	0.847302	2.33583	0.182803	0.154939	0.110736	0.0795503	0.936654	4.77269	0.847574
14	3	1	1	0.67407	0.768832	1.96647	0.298496	0.229572	0.199537	0.118028	1.33489	3.08553	0.769097	0.59151	0.591999	1.01469	1.27013	2.77142	0.184978	0.235117	0.0747685	0.120795	1.82316	5.7995	1.27106	1.61558	0.505841	0.198644	0.248512	0.67138	0.326255	0.0811277	0.684933	0.0423519	0.322151	1.24106	0.248664	0.0618336	0.686183	0.149655	0.196779	0.444745	0.233655	0.046011	0.613514	0.0237902	0.198451	1.16795	0.196919
14	4	1	1	0.0326222	0.0418563	0.253256	1.06393	0.0445028	16.7711	0.0293435	0.0565832	0.347961	0.0418288	0.00174965	1.36898	0.0726141	0.08683	0.305007	1.12743	0.0979273	7.01448	0.0529207	0.13486	0.532938	0.086859	0.00754448	0.717115	0.0604971	0.0707338	0.194836	1.17766	0.0833514	8.94187	0.0447933	0.117857	0.367082	0.070777	0.00500938	0.589565	0.0466963	0.0541509	0.146331	1.18015	0.0639443	11.5965	0.0340455	0.0893847	0.288869	0.0541833
14	1	1	1	0.0386837	0.0534293	0.28162	0.849521	0.0454036	9.32333	0.026632	0.0566528	0.399073	0.0534461	0.00285649	1.22356	0.070334	0.092558	0.291558	1.08737	0.100706	6.95254	0.0596352	0.104547	0.564685	0.0926146	0.00857747	1.10586	0.0625284	0.0861375	0.351591	0.877711	0.0756484	5.86515	0.0435687	0.0919086	0.690605	0.0861882	0.00742841	1.19196	0.0351156	0.0430579	0.105418	0.850842	0.0366554	10.8415	0.0201218	0.0620145	0.240271	0.0430814
14	2	1	1	0.379208	0.428344	0.847629	0.238702	0.10229	0.283783	0.0521125	0.757982	1.5834	0.428526	0.183635	0.531745	0.160891	0.203501	0.511868	0.410513	0.0835265	1.07168	0.0443668	0.252412	1.05773	0.203468	0.0413994	0.810991	0.313119	0.377628	0.804294	0.162531	0.061379	0.223739	0.0319086	0.606464	1.66294	0.377644	0.142615	0.502855	0.565229	0.684646	1.29985	0.129656	0.0887604	0.09543	0.0447236	1.18481	2.67175	0.684583
14	3	1	1	0.761424	0.881962	2.39896	0.287995	0.25414	0.16591	0.129195	1.44679	3.5827	0.882443	0.778706	0.533455	1.1621	1.46619	3.18136	0.177684	0.260665	0.0613395	0.132011	1.84993	6.71335	1.46701	2.15213	0.453513	0.199576	0.239718	0.704134	0.304318	0.0729914	0.665453	0.0382829	0.352393	1.35868	0.239852	0.0575291	0.701695	0.173928	0.223585	0.390164	0.244853	0.0547759	0.563611	0.0282063	0.266962	1.16378	0.223709
14	4	1	1	0.0127403	0.0179401	0.0985147	0.550178	0.00984532	17.5861	0.0056315	0.018777	0.147574	0.0178948	0.000320224	1.0733	0.0147947	0.0216277	0.039692	0.619317	0.0131822	16.3942	0.00742749	0.0225545	0.132571	0.0212851	0.000453057	1.03565	0.00753315	0.0113558	0.0498064	0.429498	0.00486708	21.1743	0.00271908	0.0104497	0.105747	0.011332	0.000128414	0.911876	0.00865004	0.0121553	0.0629923	0.590605	0.00717147	27.6727	0.00408011	0.0126788	0.124893	0.0121426
15	1	1	1	0.252655	0.306914	1.1702	0.884723	0.271292	1.56993	0.147618	0.448133	1.99478	0.30664	0.0940284	1.09638	0.149035	0.190912	1.1082	0.812976	0.155199	2.31327	0.0843037	0.262435	1.60128	0.190902	0.0364435	1.06948	0.378567	0.480297	1.50744	0.71475	0.343463	0.779958	0.180104	0.586302	2.72307	0.480536	0.230915	0.855124	0.22218	0.277	0.606932	0.641737	0.177849	1.22882	0.0943792	0.370136	1.36475	0.277137
15	2	1	1	1.08948	1.41074	5.99054	0.597477	0.843065	0.234668	0.467233	1.78674	8.37887	1.41104	1.99104	1.1004	1.08134	1.5197	6.19025	0.603636	0.917737	0.219405	0.507146	1.44982	12.0932	1.52035	2.31146	0.973665	1.08784	1.57954	6.76049	0.54424	0.859997	0.183482	0.458148	1.44641	12.1577	1.58018	2.49697	0.844052	0.983787	1.26456	4.19867	0.669999	0.84758	0.278487	0.445674	1.59381	8.22267	1.26505
15	3	1	1	1.97726	2.31262	7.50279	0.417695	0.966391	0.0929668	0.497639	3.83395	10.8873	2.31363	5.35287	0.666117	2.81098	3.64831	10.4152	0.273726	0.999032	0.0383605	0.510989	4.71758	20.238	3.64975	13.3207	0.544286	0.536196	0.670474	1.92407	0.550036	0.368934	0.433119	0.19486	0.915306	4.02588	0.670745	0.449899	0.880601	0.551357	0.873512	3.76507	0.359699	0.314337	0.214095	0.1635	0.523515	6.48234	0.873887
15	4	1	1	0.0426104	0.0651548	0.360052	0.358825	0.0231353	3.05636	0.0127054	0.0474517	0.488102	0.0644751	0.00415704	0.679177	0.0251589	0.038251	0.308754	0.701745	0.026825	10.3583	0.0151358	0.0377426	0.617927	0.0382261	0.00146123	1.05837	0.0337829	0.0541867	0.292894	0.423536	0.0229614	4.08952	0.0120195	0.0421168	0.633397	0.0542135	0.00293911	0.604944	0.0359739	0.0610934	0.401927	0.421111	0.0257404	3.55849	0.0132955	0.0453256	0.684659	0.0611251
15	1	1	1	0.382869	0.507996	3.02701	0.802412	0.40785	0.858445	0.221778	0.58895	4.04441	0.50828	0.258349	1.0066	0.399077	0.612294	2.17679	0.606001	0.371263	0.53987	0.202632	0.466279	6.36467	0.612645	0.375334	0.926366	0.515921	0.684386	2.33655	0.62106	0.425275	0.476064	0.223222	0.760083	4.11043	0.684756	0.468891	0.828774	0.267705	0.351962	1.32842	0.564865	0.198926	0.850848	0.105523	0.409638	2.53091	0.352166
15	2	1	1	0.915195	1.21242	6.69352	0.468551	0.56836	0.210376	0.30955	1.42122	8.3681	1.21302	1.47141	0.858425	0.788783	1.17468	4.38118	0.564576	0.663504	0.262065	0.361952	0.955606	11.2898	1.17523	1.38115	0.831959	0.682832	1.01051	4.36081	0.533832	0.539774	0.279399	0.285654	0.811526	7.41201	1.01113	1.02239	0.720068	0.702803	1.04504	4.73325	0.500434	0.523297	0.252426	0.276018	0.765412	7.9999	1.04569
15	3	1	1	2.10274	2.53373	9.92563	0.40855	1.03569	0.0832685	0.535116	3.77742	12.8664	2.53503	6.42639	0.601476	2.75694	3.7661	12.6656	0.280761	1.05788	0.0382455	0.54298	3.88766	21.5139	3.76792	14.1972	0.500639	0.438759	0.55874	1.96603	0.58042	0.324469	0.544874	0.170277	0.731589	3.60856	0.559023	0.312507	0.81303	0.423364	0.654315	3.24577	0.383124	0.250777	0.306708	0.131408	0.48074	5.87897	0.654557
15	4	1	1	0.0795041	0.140893	1.0232	0.263488	0.0370973	1.02122	0.0202434	0.0908479	1.34346	0.140793	0.0198228	0.430462	0.0548241	0.115119	0.771784	0.342897	0.0394555	1.59942	0.0211763	0.0472389	1.71751	0.115065	0.01324	0.534654	0.059025	0.152988	1.1768	0.252928	0.0387172	0.851697	0.0199572	0.0401514	2.25864	0.153076	0.0234323	0.322247	0.0418404	0.0955598	0.779571	0.326249	0.0311939	1.79462	0.0164063	0.0305004	1.4208	0.0956136
15	1	1	1	0.201286	0.252277	0.927713	0.928054	0.234263	2.03375	0.129586	0.348824	1.3878	0.252424	0.0637179	1.09938	0.142139	0.173219	0.4965	0.871409	0.151032	2.74739	0.0825308	0.249943	1.20042	0.17332	0.0300397	1.04492	0.344212	0.426911	1.28066	0.732979	0.313105	0.900738	0.164359	0.592572	2.22114	0.427167	0.182472	0.817702	0.203515	0.250516	0.636388	0.6132	0.153705	1.28738	0.0808868	0.349568	1.23812	0.25066
15	2	1	1	1.02796	1.33338	6.3696	0.584494	0.779758	0.239568	0.426371	1.61571	8.67096	1.33407	1.77975	1.07365	1.06706	1.48693	5.46964	0.56178	0.835578	0.206609	0.45708	1.48537	12.1485	1.48738	2.21229	0.973675	1.22269	1.65412	6.85439	0.564283	0.933899	0.17993	0.492845	1.8893	12.1273	1.65502	2.73909	0.851783	0.968887	1.21292	3.57696	0.642336	0.779476	0.277747	0.409006	1.67411	6.56757	1.2135
15	3	1	1	2.31875	2.73206	8.12319	0.48724	1.33183	0.0914792	0.683496	4.42636	11.8613	2.73342	7.47161	0.623155	3.21139	4.18871	11.0361	0.325087	1.36236	0.039608	0.695616	4.5832	21.508	4.19077	17.5625	0.535815	0.627652	0.800563	2.67079	0.553541	0.443355	0.362436	0.232507	1.03755	5.12003	0.800944	0.641511	0.853381	0.714783	1.10837	5.78584	0.341905	0.379094	0.161389	0.198407	0.7857	9.30542	1.10877
15	4	1	1	0.0418803	0.0599541	0.338146	0.462085	0.0273774	4.36826	0.0153338	0.062873	0.461789	0.0592476	0.00351028	0.799561	0.0436522	0.0700905	0.435388	0.469477	0.0328865	3.62181	0.0177718	0.0554801	0.787497	0.0700492	0.00490689	0.695618	0.0369171	0.0573384	0.278229	0.487409	0.0279639	4.45887	0.0146769	0.0458637	0.5392	0.0573726	0.00329162	0.675157	0.034794	0.0555728	0.27779	0.461364	0.0256554	4.27334	0.0132141	0.0436166	0.499764	0.0556078
15	1	1	1	0.167982	0.212221	0.752688	0.82868	0.175956	2.16102	0.0974305	0.266598	1.24238	0.212333	0.0450854	1.10368	0.0859933	0.108201	0.311839	0.893938	0.0967777	4.62517	0.0542079	0.145511	0.660654	0.10826	0.0117202	1.21383	0.259147	0.336897	1.02995	0.658432	0.221947	1.04156	0.118347	0.378012	2.08921	0.337083	0.113625	0.885678	0.159815	0.200238	0.481891	0.643223	0.128864	1.74283	0.0699517	0.273216	1.08345	0.200342
15	2	1	1	1.10277	1.38291	5.19382	0.549502	0.760292	0.219971	0.421102	1.89696	7.17161	1.3836	1.91435	1.03521	1.08226	1.49734	4.67552	0.542168	0.812061	0.196167	0.440084	1.46812	11.1612	1.4978	2.24341	0.948102	1.09213	1.57608	4.85962	0.520379	0.820567	0.176026	0.437689	1.25319	10.8564	1.57687	2.4865	0.810861	0.780583	0.990802	3.26959	0.686874	0.680747	0.364493	0.358019	1.31384	6.03353	0.99108
15	3	1	1	2.22967	2.61004	8.2318	0.443591	1.15885	0.0872362	0.595372	4.29922	11.4755	2.61244	6.82482	0.629039	2.99157	3.97547	10.9544	0.298099	1.18608	0.0383415	0.606982	4.22639	19.7607	3.97881	15.8309	0.544173	0.751047	0.931023	3.25539	0.451546	0.420748	0.256387	0.222606	1.38149	5.27176	0.931794	0.86824	0.758152	0.48555	0.732225	2.88032	0.395893	0.29014	0.283089	0.152049	0.542462	5.40251	0.732876
15	4	1	1	0.0325739	0.0513928	0.241407	0.302913	0.0153881	3.28914	0.00848821	0.0369248	0.319899	0.0508004	0.00258068	0.740434	0.0285721	0.0468464	0.291426	0.481925	0.0225538	5.75926	0.0126138	0.0374531	0.635851	0.0467994	0.00219019	0.938406	0.0255442	0.0374598	0.179194	0.39261	0.0147154	5.51046	0.00774123	0.030881	0.383758	0.037481	0.00140482	0.693653	0.0258411	0.035449	0.204212	0.473835	0.0167995	6.90834	0.00868388	0.0416602	0.374196	0.0354544
15	1	1	1	0.442262	0.535571	1.70501	0.995817	0.533626	1.0074	0.28928	0.797023	2.54423	0.535868	0.287155	0.958866	0.388318	0.548303	1.81128	0.869446	0.476982	0.882925	0.265731	0.435007	3.18622	0.548604	0.300967	0.919771	0.616121	0.747861	2.01482	0.635662	0.47562	0.45302	0.253621	1.10482	3.36093	0.748228	0.559845	0.811114	0.191493	0.224533	0.714014	0.61763	0.138747	1.45814	0.0735857	0.354981	1.4597	0.224645
15	2	1	1	0.995795	1.26875	4.79383	0.548517	0.696316	0.237642	0.382962	1.64139	6.77507	1.26945	1.61151	1.03019	1.11272	1.51176	4.24559	0.553624	0.837311	0.199134	0.455501	1.58461	11.0855	1.51242	2.28741	0.975262	1.03772	1.46807	5.1181	0.497848	0.731279	0.1794	0.387075	1.34382	9.02249	1.46888	2.15761	0.808965	0.80005	1.00478	2.73273	0.66682	0.670376	0.351159	0.354914	1.36601	5.45431	1.00533
15	3	1	1	2.64573	3.03082	8.29664	0.501762	1.52154	0.0851452	0.782943	5.12412	12.258	3.03239	9.19539	0.589636	3.44571	4.59092	11.8995	0.354889	1.63014	0.0396576	0.836742	4.26259	21.9896	4.59338	21.0992	0.509028	0.554167	0.669184	3.31155	0.642815	0.43039	0.508278	0.227853	1.03666	5.0303	0.66954	0.448283	0.916569	0.799654	1.09475	4.72668	0.391112	0.428388	0.186415	0.223642	0.911653	8.45222	1.09531
15	4	1	1	0.0321944	0.0521567	0.199477	0.223491	0.0112961	2.50157	0.00639065	0.0397337	0.288391	0.0505436	0.00255465	0.684833	0.0213647	0.028139	0.140878	0.623959	0.0175676	12.7059	0.010072	0.0350199	0.253542	0.028155	0.000792703	1.18593	0.0174931	0.0242723	0.105071	0.404755	0.00982966	8.79959	0.00518985	0.0233145	0.170819	0.0242854	0.000589783	0.764279	0.0192018	0.0253704	0.0866589	0.44354	0.0112592	9.20659	0.00593265	0.030152	0.193827	0.0253849
16	1	0	0	0.109702	0.135168	0.452398	0.608175	0.082245	2.39931	0.0438782	0.180205	0.677468	0.135232	0.0182878	0.810382	0.053081	0.0686246	0.194827	0.794975	0.0544657	6.36498	0.0298769	0.0874615	0.388227	0.0685124	0.00469395	0.854801	0.145013	0.196194	0.486311	0.572472	0.112363	1.54858	0.0596583	0.193047	1.07454	0.196276	0.0385244	0.678852	0.020119	0.0287636	0.117933	0.538827	0.0155128	10.3181	0.00855224	0.026841	0.211326	0.0287899
16	2	0	0	0.455916	0.523079	1.20355	0.280837	0.147047	0.272431	0.074689	0.897948	2.02405	0.523601	0.274158	0.445278	0.225935	0.307546	0.926195	0.382962	0.117815	0.652968	0.0617994	0.320232	1.75651	0.307642	0.0946438	0.655446	0.21863	0.291579	0.862122	0.29252	0.0853764	0.520175	0.0443113	0.341963	1.75862	0.291865	0.0851853	0.569126	0.711202	0.85891	1.76623	0.153854	0.132182	0.0903185	0.066666	1.45851	3.33695	0.85914
16	3	0	0	0.84843	0.976769	2.11916	0.401087	0.391817	0.209463	0.199892	1.71119	3.67435	0.976886	0.954307	0.53332	1.39717	1.67942	2.9998	0.229389	0.385652	0.0692432	0.195714	2.77066	6.44468	1.68121	2.82647	0.429333	0.320793	0.418287	1.06589	0.320719	0.134293	0.396499	0.0695179	0.499619	2.00133	0.418724	0.175329	0.56831	0.272372	0.336623	0.916589	0.230902	0.0778089	0.351485	0.0399124	0.510072	1.73297	0.336977
16	4	0	0	0.0359754	0.0621611	0.0608733	0.0860063	0.00531071	0.755429	0.00288031	0.0417493	0.37231	0.0617479	0.00381281	0.21534	0.00709659	0.0120483	0.0572891	0.41375	0.00488845	20.4077	0.00284879	0.00880359	0.0763635	0.011815	0.000139594	0.894792	0.00926396	0.0121019	0.0302984	0.380632	0.00439542	18.3286	0.00244411	0.0158175	0.068607	0.0115477	0.00013335	0.816287	0.0275396	0.0499134	0.0312116	0.0641363	0.00306283	0.714413	0.00162925	0.0214661	0.206055	0.047755
16	1	0	0	0.11717	0.155607	0.556352	0.582628	0.0907333	2.03466	0.0493449	0.178988	0.803033	0.155731	0.0242522	0.83891	0.0741733	0.0989438	0.287814	0.627566	0.0621503	3.45357	0.0338716	0.111605	0.642362	0.0990339	0.0098077	0.905222	0.162733	0.225931	0.471541	0.494366	0.111823	1.16379	0.059544	0.211321	1.21887	0.226194	0.0511638	0.618226	0.0309508	0.0392556	0.116686	0.588536	0.0230865	8.0351	0.012364	0.0517758	0.225911	0.039227
16	2	0	0	0.432398	0.504353	1.22596	0.28139	0.142035	0.284751	0.0725507	0.818464	2.05654	0.504764	0.254787	0.505714	0.197329	0.27255	0.832049	0.394405	0.107553	0.763004	0.0567402	0.27829	2.07118	0.272698	0.0743642	0.676432	0.167471	0.226144	0.643362	0.330599	0.0748391	0.76515	0.0392102	0.245854	1.13438	0.226374	0.0512451	0.637973	0.781891	0.920117	1.95647	0.148478	0.136629	0.0814247	0.0689475	1.67448	3.30371	0.920197
16	3	0	0	0.890184	1.02749	2.4481	0.417791	0.429628	0.207055	0.218954	1.82301	3.99119	1.02833	1.05747	0.514249	1.46459	1.76135	3.1684	0.239265	0.421874	0.0687949	0.213876	2.92811	7.12132	1.76321	3.10889	0.448481	0.331261	0.423438	1.08024	0.359449	0.152357	0.437896	0.0786717	0.544746	2.0165	0.423861	0.179658	0.592703	0.309301	0.383012	0.818705	0.232532	0.0891556	0.307871	0.0452586	0.562556	1.74055	0.383412
16	4	0	0	0.030825	0.0556396	0.0627105	0.112535	0.00621399	1.13603	0.00346385	0.0321812	0.393108	0.0552184	0.00304907	0.271857	0.00979752	0.0169694	0.112485	0.396504	0.00668581	13.6984	0.00389478	0.0122218	0.142367	0.0168619	0.000284324	0.789792	0.0100399	0.0153596	0.0743021	0.352939	0.00542727	12.6476	0.00299068	0.0136412	0.127628	0.0153774	0.000236463	0.72665	0.0261819	0.0511072	0.0413346	0.0831195	0.00410429	0.897731	0.00218885	0.0170048	0.242307	0.0493782
16	1	0	0	0.141697	0.184682	0.613744	0.55685	0.102836	1.58921	0.0541992	0.229514	0.850484	0.184674	0.0341046	0.797677	0.0746276	0.0989172	0.32216	0.683635	0.0677092	3.8386	0.0376547	0.109434	0.597464	0.0990429	0.0098095	0.846225	0.195566	0.271822	0.516292	0.444597	0.120982	0.852281	0.0631094	0.231602	1.30593	0.272117	0.0740477	0.632823	0.024945	0.0331625	0.124356	0.666748	0.0221399	10.8171	0.0119273	0.0354273	0.207878	0.0332058
16	2	0	0	0.374802	0.434974	1.14395	0.252311	0.109846	0.293683	0.0556643	0.702422	1.94832	0.43536	0.189539	0.450984	0.173245	0.214294	0.597431	0.36152	0.0774055	0.890586	0.0408277	0.313262	1.07185	0.214111	0.0458437	0.684255	0.172929	0.251186	0.904464	0.276131	0.0694467	0.567659	0.0359054	0.207137	1.46286	0.251499	0.0632518	0.581255	0.687561	0.807554	1.67844	0.131422	0.106258	0.0818913	0.0535337	1.43185	2.88036	0.808528
16	3	0	0	0.67862	0.813339	3.02217	0.447307	0.364194	0.283599	0.188001	1.31903	4.28323	0.814194	0.662912	0.647249	1.20292	1.44349	2.79457	0.257599	0.37216	0.0915442	0.191074	2.24852	6.79691	1.44473	2.08724	0.542537	0.273733	0.336619	0.982721	0.394871	0.132954	0.613867	0.0695936	0.48972	1.76025	0.336703	0.113369	0.624105	0.167563	0.223958	0.760476	0.24446	0.0548039	0.557994	0.0280438	0.259218	1.277	0.224183
16	4	0	0	0.0246644	0.0439428	0.12015	0.138342	0.00608632	1.70729	0.00330454	0.0290642	0.327974	0.0439949	0.00193555	0.314326	0.00993659	0.0174482	0.111137	0.301297	0.00526049	10.1309	0.00308825	0.0126563	0.142395	0.0174595	0.000304834	0.723669	0.0112714	0.0213433	0.157473	0.295108	0.00627143	7.50123	0.00338769	0.015155	0.219417	0.0212513	0.000451617	0.584237	0.0214575	0.0416276	0.0376208	0.0831055	0.00335825	1.11533	0.00182126	0.0141245	0.186651	0.0404094
16	1	0	0	0.156039	0.194584	0.735843	0.410288	0.0799033	1.09515	0.0415362	0.268954	0.982784	0.194749	0.0379273	0.62418	0.0485724	0.0673462	0.286211	0.749528	0.0505316	6.21849	0.0282642	0.0754192	0.559552	0.0674179	0.00454518	0.893827	0.212052	0.291578	0.696771	0.297696	0.0868922	0.527288	0.0449225	0.330886	1.55803	0.291882	0.0851953	0.4947	0.0252621	0.032544	0.119854	0.566416	0.0184554	9.37543	0.00995324	0.0365387	0.201631	0.0325827
16	2	0	0	0.330459	0.395497	0.8318	0.247508	0.0980876	0.318009	0.0499444	0.600213	1.53464	0.3963	0.157054	0.485849	0.138448	0.185169	0.609353	0.457229	0.0848106	1.29241	0.0444667	0.215768	1.05272	0.185488	0.034406	0.592849	0.154625	0.20464	0.614543	0.287993	0.0589401	0.731663	0.0306457	0.244878	1.08393	0.204658	0.0418851	0.512653	0.670863	0.779329	1.46743	0.131269	0.102126	0.0852838	0.0516194	1.25309	2.61002	0.777989
16	3	0	0	0.732323	0.846803	2.15126	0.393228	0.333159	0.236892	0.170046	1.38815	3.48005	0.847243	0.71782	0.532922	1.24956	1.4941	2.60229	0.222234	0.332333	0.0754631	0.168757	2.35892	6.03455	1.49542	2.23629	0.439542	0.275192	0.349429	0.989892	0.313705	0.109665	0.466327	0.0569883	0.429425	1.91474	0.349581	0.122207	0.580411	0.181353	0.228108	0.605381	0.223703	0.0510735	0.501049	0.0261173	0.315214	1.08555	0.22831
16	4	0	0	0.0175813	0.0236026	0.0642952	0.227973	0.00510762	5.59933	0.00281065	0.0301708	0.131081	0.0224045	0.000501961	0.609876	0.00667142	0.00902399	0.0219557	0.562655	0.00499439	36.0838	0.0028431	0.0100772	0.0626272	0.00887646	7.87916e-05	1.03872	0.00815173	0.0122538	0.0465111	0.437927	0.00535705	19.7787	0.00295969	0.0115604	0.114061	0.0122327	0.00014964	0.857692	0.0125384	0.0178305	0.0415497	0.175974	0.00309806	5.41928	0.00167967	0.0188276	0.107101	0.0176052
16	1	0	0	0.167027	0.212053	0.811719	0.44106	0.0935478	1.10279	0.0496094	0.277299	1.064	0.212098	0.0449854	0.65798	0.0541024	0.0729366	0.282695	0.769956	0.0562006	5.93387	0.0316146	0.0770713	0.507758	0.072992	0.00532783	0.941773	0.212219	0.308663	0.629859	0.349682	0.108038	0.594648	0.0567638	0.235952	1.56946	0.308963	0.0954578	0.584886	0.0261521	0.0338702	0.141131	0.602546	0.0204042	9.7516	0.0111823	0.0433197	0.219503	0.0338632
16	2	0	0	0.44943	0.532332	1.61634	0.287041	0.152935	0.273071	0.0775176	0.831421	2.46175	0.532798	0.283873	0.477268	0.215333	0.289388	0.742022	0.379237	0.109833	0.684413	0.0574069	0.321341	1.90814	0.289616	0.0838776	0.644761	0.196099	0.267315	0.739471	0.315501	0.0844163	0.609644	0.0436443	0.266063	1.42675	0.267563	0.0715899	0.603952	0.781353	0.933591	2.15183	0.157665	0.147326	0.0851437	0.0743435	1.51117	3.70072	0.934426
16	3	0	0	0.784659	0.892075	1.97292	0.370282	0.330593	0.211374	0.16849	1.62795	3.38951	0.892815	0.797119	0.609978	1.33774	1.59914	2.77456	0.20843	0.33366	0.0659972	0.169126	2.75003	5.97198	1.60082	2.56263	0.493363	0.195862	0.260545	0.849801	0.417198	0.108805	0.829384	0.0564123	0.293017	1.58914	0.260801	0.068017	0.651003	0.152251	0.19216	0.515436	0.255474	0.0490914	0.694792	0.025655	0.222063	1.03809	0.192158
16	4	0	0	0.0239014	0.0398826	0.091612	0.180496	0.00720224	2.50559	0.0039894	0.0328846	0.389782	0.0399024	0.0015922	0.386151	0.00759302	0.0139944	0.0941301	0.479427	0.00671373	19.6663	0.0038566	0.00858097	0.151931	0.0140036	0.000196102	0.81454	0.0100537	0.0211158	0.0973771	0.30808	0.00645683	8.04918	0.0035356	0.0100185	0.221573	0.0209583	0.00043925	0.587336	0.0175722	0.0282325	0.0407811	0.162642	0.00452785	3.09245	0.00239673	0.0180225	0.174577	0.0278393
17	1	0	0	0.148134	0.188192	0.692043	0.783652	0.14728	2.38221	0.0841436	0.231712	1.14609	0.187941	0.0353217	0.956312	0.174108	0.232281	0.857982	0.814279	0.18919	1.94625	0.105062	0.252705	1.43678	0.23234	0.0539818	0.886425	0.145936	0.190572	0.628025	0.997937	0.190382	3.11891	0.113513	0.223012	1.24057	0.190775	0.0363951	0.938473	0.0636825	0.0854037	0.21038	0.867517	0.0740666	5.93403	0.0432552	0.0946989	0.591697	0.0853777
17	2	0	0	0.285587	0.344712	0.752306	0.382634	0.132052	0.584571	0.069624	0.473313	1.67751	0.345113	0.119103	0.688074	0.567957	0.622208	0.856004	0.188768	0.117539	0.161546	0.062633	1.22197	2.0466	0.622663	0.38771	0.530994	0.202023	0.233518	0.566611	0.366359	0.0856112	0.875236	0.0477939	0.383477	1.14763	0.233681	0.0546069	0.830703	0.691403	0.750104	1.53168	0.174577	0.131037	0.122321	0.0689147	1.46417	2.61989	0.750594
17	3	0	0	0.610728	0.741968	2.01869	0.580392	0.43091	0.425398	0.23449	1.17548	3.37416	0.742446	0.551225	0.86467	0.484418	0.570416	1.22178	0.494901	0.282589	0.483922	0.157779	0.952196	2.79796	0.571002	0.326043	0.907974	1.16803	1.38884	3.07385	0.352363	0.489857	0.139226	0.269078	2.26778	5.44511	1.39021	1.93267	0.753473	0.33139	0.438697	1.10188	0.463845	0.203681	0.578228	0.111495	0.469395	2.68029	0.439115
17	4	0	0	0.0424166	0.0690973	0.0900607	0.124611	0.00861686	1.02707	0.00491118	0.055618	0.428009	0.0691502	0.00478175	0.398086	0.0129212	0.0205667	0.0817228	0.517698	0.0102924	15.3017	0.00604815	0.0136963	0.121003	0.0198811	0.000395259	0.913024	0.0139081	0.018956	0.0713714	0.441393	0.00837211	13.5246	0.00486568	0.0206792	0.105816	0.0189675	0.000359765	0.944653	0.019316	0.0360616	0.0302485	0.16808	0.00573212	2.85761	0.00332355	0.0163004	0.161678	0.0341036
17	1	0	0	0.14178	0.177363	0.783306	0.673932	0.119649	2.11579	0.0666903	0.241871	1.0827	0.177539	0.0315202	1.01853	0.157058	0.207374	0.788357	0.597365	0.124012	1.62142	0.0698786	0.24048	1.36145	0.207599	0.0430972	0.920403	0.160098	0.215502	1.00784	0.780444	0.168359	2.05049	0.0954214	0.253326	1.52591	0.215722	0.046536	0.968917	0.06344	0.0862312	0.22214	0.706563	0.0609239	4.63053	0.0344274	0.0987711	0.614753	0.0862257
17	2	0	0	0.365597	0.432762	0.719663	0.358321	0.154876	0.428511	0.0800538	0.638199	1.7464	0.432225	0.186819	0.642763	0.6518	0.726297	1.27531	0.187513	0.136217	0.134721	0.0710944	1.36405	2.48417	0.726439	0.527714	0.541497	0.201676	0.243416	0.536921	0.381765	0.0929619	0.839376	0.0497706	0.365524	1.2736	0.243505	0.0592948	0.808503	0.686049	0.76683	1.45409	0.170657	0.130941	0.113901	0.0670547	1.51529	2.82063	0.767275
17	3	0	0	0.708196	0.864177	2.834	0.532978	0.460988	0.33095	0.247585	1.30608	4.39387	0.86493	0.748103	0.868562	0.618357	0.714948	1.36062	0.470778	0.33687	0.367069	0.187949	1.20664	3.58895	0.715561	0.512027	0.999423	1.15462	1.45615	3.9529	0.322659	0.470242	0.116973	0.248451	2.05443	7.8018	1.4574	2.124	0.668035	0.562394	0.721035	1.39217	0.393067	0.283662	0.293711	0.152963	0.841679	3.51052	0.721662
17	4	0	0	0.0427636	0.0667656	0.110889	0.144839	0.00968226	1.24712	0.005573	0.0621281	0.420797	0.0668483	0.00446869	0.422575	0.0163534	0.0265702	0.113807	0.496519	0.0128264	11.2475	0.00750582	0.0185411	0.153799	0.0258327	0.00066733	0.933493	0.0125367	0.0162519	0.0567748	0.569724	0.00926517	20.6212	0.00545371	0.0192274	0.0918	0.0162626	0.000264471	1.02601	0.0170476	0.0276222	0.0365684	0.241958	0.00642561	5.28768	0.00372918	0.0212724	0.141673	0.0265567
17	1	0	0	0.186568	0.246273	1.07237	0.714862	0.176192	1.63708	0.0994486	0.269618	1.48162	0.24647	0.0607474	1.05571	0.146404	0.201252	1.01466	0.651784	0.131234	1.81635	0.073635	0.207729	1.64705	0.201346	0.04054	0.983539	0.272025	0.358619	1.35685	0.727424	0.261099	1.12718	0.145221	0.429177	2.68293	0.358937	0.128836	1.05072	0.0686553	0.087797	0.26096	0.680319	0.0597642	4.3902	0.0338799	0.114777	0.629322	0.0878474
17	2	0	0	0.417795	0.508278	1.16594	0.497391	0.252937	0.52124	0.134793	0.71413	2.48405	0.508528	0.2586	0.831357	0.82719	0.929385	1.45347	0.230915	0.21482	0.131359	0.113685	1.71822	3.54144	0.930299	0.865456	0.611924	0.314115	0.401674	0.823024	0.372857	0.149857	0.507325	0.0819511	0.436389	2.09128	0.401915	0.161536	0.788129	0.972429	1.05602	1.99203	0.232302	0.245559	0.113838	0.127203	2.06986	3.75954	1.05707
17	3	0	0	0.764124	0.90758	2.52558	0.505174	0.458861	0.296558	0.244676	1.45833	4.06517	0.908324	0.825053	0.837301	0.686965	0.829168	2.28594	0.416305	0.345356	0.278122	0.191402	1.2552	4.48454	0.829574	0.688192	0.856239	0.96375	1.23102	3.03183	0.322844	0.397514	0.140633	0.213208	1.75607	6.04133	1.23129	1.51607	0.657904	0.686904	0.884748	2.21814	0.308366	0.273004	0.179726	0.140869	1.10604	4.70573	0.885323
17	4	0	0	0.0370693	0.0526397	0.111892	0.274206	0.0144308	2.9776	0.00824688	0.0554833	0.325258	0.0526274	0.00276964	0.714921	0.0192618	0.0275586	0.120507	0.50999	0.0139474	11.0549	0.00826828	0.0263352	0.213954	0.0273483	0.000747927	1.02273	0.0144276	0.0202832	0.110051	0.834435	0.0169227	23.499	0.00966499	0.0211528	0.166466	0.0202804	0.000411294	1.01359	0.0120384	0.0174036	0.056079	0.458585	0.00798723	15.3561	0.00465837	0.0158636	0.131828	0.0174171
17	1	0	0	0.128365	0.169137	0.990779	0.740825	0.125313	2.48423	0.071081	0.195878	1.41285	0.169154	0.0286129	1.08803	0.123473	0.159551	0.682803	0.653223	0.104303	2.30642	0.0588037	0.198629	1.20407	0.159674	0.0254957	1.07053	0.195206	0.254278	1.12297	0.807292	0.205438	1.80102	0.116633	0.305664	1.82448	0.254478	0.0647591	1.09998	0.0664803	0.0852846	0.310057	0.711438	0.0607193	4.74785	0.034584	0.109804	0.591696	0.0853472
17	2	0	0	0.386464	0.455122	0.906578	0.382932	0.174378	0.433381	0.0898687	0.676154	1.94948	0.455375	0.207367	0.616658	0.574733	0.632029	0.917386	0.196726	0.124468	0.162269	0.0649575	1.237	2.12978	0.632698	0.400307	0.520876	0.199029	0.242178	0.525885	0.438769	0.106373	1.00491	0.0590631	0.343976	1.2677	0.242435	0.0587747	0.91738	0.925158	1.01148	1.73661	0.172277	0.174429	0.0865383	0.0887138	2.09798	3.252	1.01249
17	3	0	0	0.737966	0.87818	2.15851	0.526165	0.462346	0.315965	0.243966	1.39583	3.63606	0.878709	0.772129	0.793602	0.760716	0.904385	2.05568	0.409877	0.371072	0.243535	0.199605	1.48842	4.37784	0.905326	0.819615	0.797283	1.01864	1.27252	3.17577	0.310216	0.395156	0.127885	0.207505	1.78255	5.86173	1.27381	1.62259	0.632437	0.715124	0.898175	2.13422	0.314245	0.282534	0.181274	0.146535	1.25616	4.62227	0.899089
17	4	0	0	0.0460224	0.0921288	0.108321	0.117343	0.0106867	0.718528	0.00595958	0.0421608	0.549661	0.0910722	0.00829414	0.324533	0.0236214	0.0371897	0.162926	0.405	0.014526	6.43523	0.00827844	0.0269812	0.23215	0.0358668	0.00128642	0.876844	0.0133249	0.0213899	0.123356	0.607594	0.0129622	16.3476	0.00744019	0.0154341	0.1682	0.0213336	0.000455124	0.822043	0.0262377	0.0487495	0.0587409	0.198484	0.00939372	2.37774	0.00532583	0.0227471	0.331838	0.0473273
17	1	0	0	0.132258	0.174276	0.680281	0.70371	0.122557	2.2985	0.0697167	0.214134	0.954126	0.174159	0.0303314	0.949612	0.112196	0.152447	0.449197	0.655064	0.0999787	2.38651	0.0555918	0.146151	0.969048	0.152624	0.0232942	0.922058	0.171886	0.232064	0.812355	0.767523	0.178332	1.88917	0.101987	0.25083	1.58192	0.232347	0.0539851	0.9449	0.0513596	0.0697049	0.240933	0.760464	0.0530294	6.19202	0.0301098	0.074932	0.492317	0.069733
17	2	0	0	0.344842	0.408795	0.847672	0.368659	0.150868	0.470408	0.0787805	0.636005	1.75757	0.409234	0.167473	0.663888	0.381647	0.437571	0.741314	0.231706	0.101469	0.283528	0.0543743	0.760113	1.64898	0.437924	0.191777	0.64578	0.216142	0.265157	0.558128	0.381403	0.101237	0.804909	0.0567092	0.386308	1.25262	0.265432	0.0704542	0.867156	0.835774	0.913417	1.55727	0.158409	0.144849	0.0885856	0.0740685	1.82929	3.01088	0.914398
17	3	0	0	0.737047	0.853806	2.06764	0.537518	0.459263	0.332897	0.243023	1.44896	3.58231	0.854415	0.730024	0.797057	0.674451	0.799484	1.79429	0.474668	0.379762	0.32369	0.207192	1.32396	4.06631	0.800059	0.640094	0.912798	1.09116	1.33683	3.33352	0.311155	0.416269	0.121767	0.217934	2.01946	5.9319	1.33782	1.78976	0.617273	0.644988	0.857611	1.99762	0.334795	0.287334	0.201562	0.148465	0.924267	4.10935	0.858239
17	4	0	0	0.028787	0.0521946	0.311348	0.190675	0.0099608	2.05473	0.0056073	0.033802	0.592354	0.0522396	0.00272897	0.507525	0.0139492	0.0218325	0.152569	0.521088	0.0113027	13.9493	0.0065629	0.0184043	0.208174	0.0216906	0.000470482	0.995837	0.0119965	0.0220905	0.243666	0.459226	0.0101527	11.8165	0.0057757	0.0153344	0.288338	0.0221084	0.000488781	0.897247	0.0182904	0.0314507	0.0630493	0.222786	0.006881	4.06537	0.00387818	0.0166005	0.223973	0.0308862
18	1	0	0	0.104316	0.14605	0.724231	0.714442	0.104332	2.73131	0.0582468	0.155521	0.968437	0.146033	0.0213256	0.977264	0.092861	0.125174	0.353906	0.82003	0.102727	3.805	0.0597124	0.140252	0.904404	0.125272	0.0156931	0.992304	0.10972	0.142629	0.461068	0.749634	0.107045	2.97685	0.0607003	0.174091	1.06015	0.142796	0.0203908	0.963791	0.097311	0.134946	0.537587	0.666847	0.090097	2.73783	0.0499774	0.127505	0.853381	0.135109
18	2	0	0	0.294248	0.34777	0.713422	0.404189	0.140472	0.619521	0.0748282	0.526871	1.4574	0.34754	0.120784	0.708868	0.168947	0.202424	0.406188	0.502294	0.101833	1.37448	0.0564934	0.29363	0.896142	0.202735	0.0411016	0.839542	0.152966	0.190065	0.580825	0.816848	0.155498	2.51406	0.0911052	0.259685	1.10002	0.190364	0.0362383	0.879468	0.768718	0.848229	1.46285	0.184261	0.156256	0.114343	0.0822269	1.66326	2.82458	0.848014
18	3	0	0	0.871467	1.00118	2.15005	0.45324	0.454135	0.231545	0.23246	1.79788	3.8601	1.00197	1.00395	0.648496	0.794611	0.931744	1.97547	0.352736	0.329037	0.202127	0.175879	1.54696	4.18481	0.932814	0.870142	0.701613	0.990672	1.2683	3.31753	0.305593	0.388028	0.124876	0.201335	1.64549	6.26293	1.26976	1.61228	0.533969	0.801489	1.03154	2.15648	0.284739	0.294045	0.139668	0.148946	1.31777	4.78403	1.03268
18	4	0	0	0.0283463	0.0460934	0.0707954	0.233296	0.0107562	2.91457	0.00619549	0.0379392	0.302592	0.0461052	0.00212569	0.609848	0.0154598	0.0235501	0.0958095	0.439567	0.0101056	11.2427	0.00594213	0.0208963	0.137568	0.0229898	0.000528532	0.983258	0.0105896	0.0138112	0.0408946	0.763528	0.0105236	31.9026	0.00606046	0.0179717	0.102276	0.0137829	0.000189967	1.02494	0.0253218	0.0420224	0.037864	0.130361	0.00534756	1.75354	0.00295075	0.0268966	0.19764	0.0410211
18	1	0	0	0.13615	0.183377	0.756485	0.640708	0.117608	1.90347	0.0641357	0.208321	1.14434	0.18356	0.0336942	0.855455	0.123493	0.169174	0.481061	0.603655	0.10223	1.97829	0.0567372	0.168174	1.22313	0.169352	0.0286799	0.991897	0.139211	0.195664	0.466086	0.665929	0.130443	1.86834	0.0716874	0.176195	1.26081	0.195882	0.0383696	0.926294	0.0682653	0.0950813	0.464331	0.611544	0.0582095	3.51783	0.0318719	0.0928543	0.735657	0.0951845
18	2	0	0	0.289753	0.342744	0.636753	0.417421	0.143204	0.660489	0.0777372	0.527992	1.41954	0.343069	0.117696	0.894946	0.258051	0.315203	1.13278	0.387846	0.122359	0.691659	0.0688409	0.443842	1.89554	0.315484	0.0995302	0.869533	0.164202	0.212527	0.735158	0.789028	0.167803	2.12659	0.096183	0.267972	1.43736	0.21267	0.0452287	1.0755	0.719256	0.804952	1.38448	0.17992	0.144894	0.116848	0.0757812	1.56411	2.74905	0.805323
18	3	0	0	0.845242	0.977996	2.2964	0.506273	0.495504	0.265675	0.254493	1.71024	3.82806	0.978728	0.957909	0.695715	0.670655	0.858795	2.17279	0.40918	0.351693	0.255958	0.189089	1.02597	4.26392	0.859507	0.738752	0.803207	1.03783	1.33752	3.23179	0.317685	0.42529	0.121548	0.217832	1.66938	6.32515	1.33871	1.79215	0.585536	0.536333	0.700628	1.63203	0.332732	0.233351	0.242077	0.119065	0.898109	3.52048	0.701318
18	4	0	0	0.029786	0.042581	0.0990415	0.255689	0.0108972	3.40758	0.00618944	0.0464766	0.283287	0.0426189	0.00181637	0.675999	0.0175424	0.0245654	0.0942426	0.467338	0.011494	11.4807	0.00694462	0.0232602	0.1647	0.0245946	0.000604893	1.00587	0.0114843	0.0144059	0.0394073	0.804192	0.0115781	31.7442	0.00657986	0.0177412	0.0828029	0.0143971	0.000207278	0.969515	0.0266973	0.0372048	0.061497	0.182652	0.00679923	2.69836	0.00373911	0.036184	0.197634	0.037225
18	1	0	0	0.164593	0.220783	1.01447	0.687047	0.151853	1.74163	0.08508	0.242131	1.45881	0.221023	0.0488509	0.930802	0.164709	0.217154	0.584953	0.616391	0.133997	1.58804	0.0750481	0.248072	1.33244	0.21739	0.0472584	0.972465	0.187795	0.256937	0.83219	0.8008	0.205909	1.71602	0.113456	0.258456	1.86322	0.25713	0.0661157	0.93906	0.0949133	0.135648	0.589095	0.619825	0.0841672	2.48928	0.045901	0.121516	1.21262	0.135792
18	2	0	0	0.313092	0.376634	0.625267	0.456033	0.171931	0.644761	0.0916461	0.566304	1.48744	0.377014	0.14214	0.800676	0.283932	0.333756	0.763562	0.425125	0.142006	0.708241	0.079024	0.510449	1.57819	0.334033	0.111578	0.875748	0.204006	0.265422	1.1305	0.717693	0.190293	1.51069	0.106205	0.335819	1.82379	0.265146	0.0703023	1.07663	0.868504	0.958374	1.55502	0.18726	0.179469	0.099925	0.0917829	1.90599	3.07636	0.958393
18	3	0	0	0.968883	1.12484	2.50875	0.500708	0.563493	0.228551	0.289461	1.99733	4.14478	1.12539	1.26651	0.694406	0.800314	1.00939	2.58551	0.411027	0.415233	0.217628	0.222104	1.29837	4.99392	1.01023	1.02057	0.731067	1.13367	1.46112	3.03548	0.31852	0.465782	0.111189	0.237768	1.90345	6.18213	1.46233	2.13842	0.555511	0.643338	0.863215	2.01466	0.329241	0.284455	0.194992	0.145551	0.931637	4.70813	0.863972
18	4	0	0	0.0300632	0.0428872	0.145478	0.398661	0.0171094	5.36076	0.00987391	0.0451562	0.325794	0.0429172	0.00184189	0.880145	0.0167124	0.0225778	0.081819	0.692438	0.0156076	17.5249	0.0089036	0.0259508	0.147791	0.0225401	0.000508054	1.04401	0.0219526	0.0317619	0.141808	0.683314	0.0217188	12.3008	0.0124269	0.0286434	0.263959	0.0317845	0.00101025	0.999295	0.0148956	0.0218368	0.0571217	0.407288	0.00889518	10.2329	0.00488095	0.0181717	0.155856	0.02184
18	1	0	0	0.191168	0.249653	1.21388	0.654549	0.163388	1.43068	0.0891449	0.296652	1.73555	0.249619	0.0623096	0.846965	0.18154	0.239213	0.642835	0.564196	0.135107	1.28672	0.0737872	0.276818	1.53772	0.239469	0.0573453	0.901451	0.189964	0.267805	0.85526	0.709545	0.190238	1.46098	0.105021	0.22601	1.89356	0.268112	0.0718842	0.884472	0.12342	0.168165	0.585933	0.572588	0.0963997	1.84011	0.0521568	0.160315	1.06397	0.168358
18	2	0	0	0.29188	0.351443	0.870157	0.42748	0.150313	0.649146	0.0802609	0.514817	1.70876	0.351626	0.123641	0.873334	0.323122	0.367467	0.871998	0.335861	0.123408	0.509437	0.0687798	0.659356	1.65588	0.367439	0.135011	0.875728	0.178667	0.235557	0.82559	0.716584	0.168883	1.70176	0.0945231	0.271548	1.77828	0.235678	0.0555443	1.05341	0.68728	0.769664	1.34108	0.192289	0.148056	0.130621	0.0774389	1.50857	2.69038	0.769969
18	3	0	0	1.03565	1.17276	3.28878	0.498504	0.585156	0.217101	0.299136	2.13705	4.97514	1.17382	1.37786	0.698488	0.83526	1.07138	3.08494	0.486284	0.521158	0.24738	0.284134	1.43288	5.54465	1.07172	1.14857	0.814158	1.03753	1.37529	3.10486	0.359741	0.495035	0.135053	0.255739	1.53552	6.85439	1.37609	1.89362	0.596514	0.726103	1.00447	2.03271	0.363888	0.365646	0.185109	0.186902	0.916033	4.88876	1.00483
18	4	0	0	0.0281164	0.0434443	0.0830059	0.315713	0.0137224	4.20968	0.00795292	0.0396038	0.292399	0.0434649	0.0018892	0.792568	0.0153565	0.0215258	0.074062	0.644214	0.0131635	18.9975	0.00793191	0.02264	0.108211	0.0204334	0.000417524	1.06266	0.0151222	0.0201574	0.0708881	0.778334	0.0156317	22.3039	0.0089962	0.0218707	0.141634	0.0200835	0.000403346	0.998227	0.0188842	0.0308666	0.0331757	0.263378	0.00774863	5.0415	0.00436365	0.0221389	0.158814	0.0294202
18	1	0	0	0.156889	0.213515	0.916936	0.687458	0.146687	1.82533	0.0831061	0.228758	1.44034	0.213376	0.0455294	0.956635	0.152092	0.202415	0.457604	0.658598	0.133475	1.85212	0.0760721	0.217231	1.13071	0.202665	0.0410731	0.913641	0.16485	0.211268	0.509884	0.721243	0.152548	1.90137	0.0850586	0.263228	1.21319	0.211507	0.0447354	0.957491	0.101909	0.14049	0.454554	0.684154	0.0962378	2.69974	0.0534202	0.137093	0.846007	0.140667
18	2	0	0	0.294386	0.362961	1.02183	0.43552	0.158166	0.634323	0.083661	0.500212	1.8872	0.363167	0.13189	0.784784	0.273287	0.322788	0.702183	0.367135	0.118515	0.632381	0.0658979	0.516184	1.4276	0.322809	0.104206	0.883199	0.187839	0.252032	0.688381	0.676774	0.170712	1.52352	0.0969372	0.299011	1.80492	0.252244	0.063627	0.994024	0.740029	0.818466	1.44796	0.178998	0.146632	0.114246	0.0766666	1.63056	2.94439	0.819186
18	3	0	0	0.794696	0.961156	2.9711	0.493477	0.474313	0.26734	0.246979	1.49971	4.9457	0.961165	0.923837	0.686368	0.749864	0.920627	2.61625	0.385078	0.354747	0.222208	0.188581	1.30277	5.12411	0.921233	0.84867	0.746219	1.02477	1.30971	3.0967	0.30729	0.402769	0.120935	0.207762	1.64518	7.02935	1.31071	1.71796	0.574604	0.548123	0.759497	2.57787	0.316822	0.240825	0.214961	0.124202	0.766032	4.81505	0.760125
18	4	0	0	0.0241729	0.039432	0.128909	0.317256	0.0124847	4.63261	0.00717403	0.0297575	0.330513	0.0393521	0.00154859	0.79943	0.0157344	0.0228305	0.0863327	0.592799	0.0125742	16.5782	0.00745905	0.0192643	0.126533	0.0212116	0.000449932	1.06273	0.0138193	0.0183343	0.0598431	0.791012	0.0144977	25.0477	0.00841392	0.0207196	0.132093	0.018328	0.000335916	1.02566	0.0177772	0.032702	0.0313873	0.234201	0.00735323	4.22672	0.00416662	0.0184264	0.165354	0.0313971
19	1	0	0	0.0641351	0.0826705	0.249376	0.710381	0.0574811	5.0719	0.0332077	0.104959	0.402201	0.0809159	0.00654738	0.873334	0.0560816	0.0780131	0.381601	0.880098	0.06877	6.55193	0.0400041	0.0800657	0.580641	0.078139	0.0061057	0.945144	0.0752428	0.0988521	0.325868	0.831065	0.0818307	4.98789	0.0483592	0.121991	0.555689	0.0984648	0.00969532	0.870593	0.0393961	0.0531426	0.164242	1.13356	0.0602046	12.3304	0.0347814	0.0595757	0.320449	0.0531111
19	2	0	0	0.414532	0.488823	1.237	0.311613	0.152433	0.329997	0.0789658	0.834936	2.11809	0.489175	0.239292	0.641687	0.344117	0.431915	1.12544	0.395015	0.170693	0.513184	0.0958244	0.549075	2.25878	0.432117	0.186725	0.893023	0.150621	0.195618	0.456167	0.915164	0.179217	2.71645	0.104174	0.236858	1.34898	0.19583	0.0383495	1.02675	0.791509	0.925728	1.84766	0.166289	0.154053	0.0922748	0.0791946	1.59261	3.57714	0.926416
19	3	0	0	0.90435	1.08738	2.59575	0.408287	0.444462	0.197233	0.233731	1.67185	4.36715	1.0886	1.18505	0.757451	0.822951	1.04112	2.38301	0.296656	0.309163	0.153198	0.166388	1.3226	4.82721	1.04216	1.0861	0.692068	1.2453	1.54791	3.67275	0.239755	0.371499	0.0799972	0.192068	2.30555	6.81269	1.54949	2.40093	0.566741	0.253232	0.324387	0.818972	0.423827	0.137636	0.707041	0.0745644	0.387158	1.62522	0.324746
19	4	0	0	0.0352864	0.0675119	0.0795564	0.12141	0.00816097	1.06022	0.00479038	0.0389153	0.415411	0.0672182	0.00451829	0.357897	0.0143089	0.0233392	0.150694	0.384172	0.00854917	10.1311	0.00501711	0.0195298	0.175925	0.0222535	0.000495219	0.939138	0.00979336	0.0137433	0.0838665	0.624163	0.00857806	26.8564	0.0050726	0.0144669	0.114698	0.0137433	0.000188878	1.07673	0.0228377	0.0426706	0.0384327	0.154982	0.00628694	2.16609	0.00356445	0.0173814	0.205641	0.0405656
19	1	0	0	0.0587871	0.0832507	0.246358	0.505748	0.0420684	3.43708	0.0237811	0.0770547	0.538909	0.0831805	0.00691899	0.966314	0.0485959	0.0642985	0.252807	0.719247	0.0462257	6.37288	0.0263237	0.0786953	0.466332	0.0642696	0.00413058	1.04267	0.0617202	0.0810577	0.250225	0.756961	0.0607096	5.36105	0.0344839	0.0990898	0.47798	0.0802017	0.00643231	1.06208	0.0330361	0.0438796	0.162185	0.979188	0.0430119	12.9	0.0248905	0.0516243	0.311087	0.0439261
19	2	0	0	0.425287	0.488436	1.32584	0.339159	0.165814	0.363245	0.0868232	0.849109	2.21096	0.488898	0.239021	0.701173	0.24104	0.319556	0.889208	0.488774	0.156335	0.854997	0.0874703	0.350405	1.81003	0.319851	0.102305	0.941737	0.153057	0.199491	0.5301	0.874631	0.174428	2.50424	0.0995996	0.243317	1.21282	0.19943	0.0397725	1.12034	0.835894	0.976522	2.1175	0.168907	0.164934	0.0888487	0.0847179	1.63148	3.77591	0.976477
19	3	0	0	0.991417	1.14542	2.95152	0.368745	0.422766	0.168919	0.222038	2.05255	4.49604	1.1465	1.31446	0.704243	0.86876	1.10116	2.29514	0.268069	0.295186	0.13165	0.159632	1.54118	5.12154	1.10116	1.21255	0.658225	1.09329	1.43288	3.33304	0.240899	0.345162	0.0876236	0.179887	1.74834	6.35693	1.43281	2.05295	0.528552	0.3258	0.471033	1.28095	0.387563	0.182627	0.444085	0.0986075	0.418917	2.99829	0.471218
19	4	0	0	0.0377524	0.0525276	0.0806812	0.190429	0.0100164	2.11839	0.00586084	0.0571595	0.325924	0.052599	0.00276665	0.521058	0.0123905	0.0205536	0.138335	0.429594	0.00881679	12.3316	0.00519428	0.016233	0.16641	0.0205236	0.000421217	0.862718	0.0105121	0.0160298	0.0521187	0.647818	0.0103575	23.6572	0.00604739	0.0136028	0.159724	0.0159883	0.000255626	0.98932	0.0300111	0.0475459	0.0822766	0.123894	0.00574808	1.51892	0.0032695	0.0367903	0.31061	0.0463951
19	1	0	0	0.0604825	0.0795647	0.24578	0.459784	0.0366177	3.28455	0.0208329	0.0966591	0.543071	0.079641	0.00634269	0.916809	0.0396683	0.0520075	0.21821	0.746342	0.0386536	8.22648	0.0220657	0.0608787	0.386972	0.0517907	0.00268228	0.98016	0.0626852	0.0862024	0.395093	0.646254	0.0557391	4.32757	0.0321926	0.0907103	0.668448	0.0862494	0.00743896	0.968092	0.028484	0.039981	0.106886	0.749374	0.029615	11.0491	0.0172564	0.0421294	0.294108	0.0395196
19	2	0	0	0.40346	0.459198	0.820557	0.30437	0.139868	0.345071	0.0728685	0.805546	1.7229	0.459532	0.21117	0.626129	0.224597	0.295674	1.156	0.475882	0.140702	0.910301	0.0795764	0.326294	1.94052	0.295665	0.0874178	0.983817	0.138922	0.175229	0.448906	0.904433	0.157862	2.96749	0.0904049	0.230752	1.01227	0.174542	0.0304651	1.10994	0.824103	0.950234	1.73204	0.155897	0.148238	0.0844391	0.0763464	1.64037	3.53775	0.950873
19	3	0	0	0.702461	0.866272	2.39527	0.396534	0.343892	0.243513	0.18315	1.22099	3.97556	0.867246	0.752115	0.743919	0.739976	0.932211	2.44739	0.285099	0.266088	0.165637	0.144284	1.30376	5.1027	0.933317	0.87108	0.647832	0.879229	1.12103	2.81815	0.234187	0.262837	0.10976	0.138259	1.45767	5.8967	1.12234	1.25965	0.507225	0.300527	0.42563	1.49382	0.302262	0.128804	0.383519	0.0696428	0.393459	3.26312	0.426132
19	4	0	0	0.0245897	0.0405231	0.0786785	0.231059	0.00936926	3.29979	0.00542565	0.026767	0.275664	0.0405492	0.00164424	0.661925	0.0100513	0.0178036	0.109774	0.448048	0.00785848	14.8896	0.00458049	0.0111542	0.13857	0.0175394	0.00030763	0.933617	0.00742342	0.0103805	0.0531908	0.951828	0.00988589	52.4817	0.00566139	0.0114549	0.0782043	0.0103862	0.000107873	1.04921	0.0200649	0.0386781	0.0345573	0.141296	0.00534219	2.10445	0.00300829	0.016396	0.204669	0.0378086
19	1	0	0	0.079206	0.107034	0.429621	0.633982	0.0678848	3.332	0.0382029	0.118319	0.767799	0.107077	0.0114655	0.912005	0.0731961	0.0994233	0.258206	0.655391	0.0648839	3.66759	0.0359463	0.108144	0.706717	0.0990003	0.00980106	0.969481	0.0908282	0.122008	0.320561	0.710363	0.0867105	3.26436	0.0486385	0.134036	0.756602	0.122065	0.0148999	0.99427	0.0406293	0.0554732	0.217926	0.861231	0.0478091	8.79806	0.0271124	0.059534	0.482664	0.0555125
19	2	0	0	0.284003	0.348736	0.811279	0.312152	0.108937	0.476268	0.058006	0.506185	1.56932	0.348988	0.121793	0.720433	0.265241	0.336956	1.00335	0.395121	0.133245	0.655563	0.0745511	0.428016	1.85138	0.337225	0.113721	0.915675	0.12683	0.15828	0.372806	0.806974	0.127813	2.86747	0.0719335	0.222963	0.858383	0.158386	0.0250861	1.0984	0.652164	0.743531	1.46299	0.135859	0.101058	0.0947226	0.0524105	1.33652	2.64244	0.743845
19	3	0	0	0.818729	0.9661	2.51121	0.382415	0.369757	0.21041	0.196712	1.58366	4.31464	0.9669	0.934896	0.756265	0.852792	1.08602	2.15834	0.253231	0.275213	0.125725	0.1485	1.29531	5.12744	1.08681	1.18115	0.621033	0.961996	1.2412	3.06743	0.226024	0.28079	0.0963589	0.148712	1.49818	5.6466	1.2423	1.54332	0.532802	0.289127	0.393788	1.21981	0.365614	0.14411	0.503716	0.0782582	0.387268	2.29759	0.394159
19	4	0	0	0.0161957	0.0271337	0.0799279	0.289237	0.00785088	6.0578	0.00446318	0.0174703	0.199147	0.0271434	0.000736766	0.741922	0.0111243	0.0209063	0.111456	0.370577	0.00763927	10.2875	0.00437177	0.0107338	0.143105	0.0206145	0.000424959	0.723521	0.00825304	0.0112973	0.04472	0.757268	0.00847634	38.6455	0.0048419	0.0122217	0.0824985	0.0111933	0.00012529	1.05646	0.0167958	0.0323945	0.042924	0.122639	0.00390665	2.19295	0.00222526	0.0106403	0.190829	0.0318549
19	1	0	0	0.0403773	0.0565367	0.193122	0.693816	0.0392754	7.03422	0.0225407	0.0554491	0.37699	0.0566078	0.00320444	0.928728	0.0424663	0.0537342	0.240105	0.698632	0.0374911	7.28524	0.0209798	0.0742579	0.372815	0.0536635	0.00287977	1.01248	0.0599605	0.0821271	0.320908	0.774043	0.0629114	5.41294	0.035757	0.0910177	0.621401	0.0812763	0.00660583	0.938766	0.0276764	0.0358695	0.125903	1.10975	0.0398557	17.7676	0.0229171	0.0454184	0.231842	0.0359142
19	2	0	0	0.420841	0.493752	1.39832	0.316203	0.156251	0.335637	0.0819566	0.81728	2.24741	0.494148	0.244182	0.64157	0.257108	0.337075	1.03666	0.460033	0.155207	0.762026	0.0867385	0.382344	1.94741	0.337381	0.113826	0.875035	0.157267	0.196797	0.438521	0.730264	0.14383	2.07404	0.0804554	0.252904	1.08909	0.196956	0.0387917	1.08796	0.809453	0.951337	2.20668	0.168085	0.160035	0.0902962	0.081855	1.51145	3.80535	0.952112
19	3	0	0	0.616245	0.727204	1.68567	0.471279	0.343116	0.350618	0.185849	1.20929	2.88639	0.728052	0.53006	0.859355	0.733564	0.866525	1.67911	0.309381	0.268133	0.197358	0.148241	1.41216	3.59856	0.866677	0.751129	0.776575	0.835005	1.02324	2.27823	0.255492	0.261332	0.134163	0.140367	1.47103	4.09848	1.02286	1.04624	0.595659	0.287158	0.39354	1.32983	0.352405	0.138779	0.476849	0.0739506	0.374022	2.52398	0.393804
19	4	0	0	0.0241737	0.0448924	0.0808914	0.158638	0.00712137	2.04922	0.00412952	0.0288539	0.322295	0.0448906	0.00201516	0.508756	0.00901264	0.0166088	0.122637	0.333775	0.00533369	12.1961	0.00311436	0.0106192	0.150591	0.0159799	0.000255356	0.750825	0.0067242	0.00923164	0.057208	0.834335	0.00770919	52.8429	0.00451152	0.0106078	0.0845911	0.00923992	8.53761e-05	1.11783	0.0208095	0.0405429	0.0353311	0.108705	0.0042761	1.5723	0.00243294	0.0184055	0.228376	0.0393367
20	1	0	0	0.173817	0.209717	0.64389	0.80206	0.168409	2.11547	0.0932667	0.323651	1.02097	0.209971	0.0440879	0.910767	0.206647	0.259131	0.608932	0.5817	0.150884	1.23808	0.0832982	0.348337	1.26549	0.259384	0.0672803	0.80992	0.131301	0.174454	0.552546	0.935629	0.163397	3.09021	0.0942468	0.199636	1.16393	0.174638	0.0304985	0.858838	0.158225	0.191361	0.330493	0.64234	0.123056	1.89762	0.0696441	0.283037	0.868783	0.191575
20	2	0	0	0.380441	0.440999	0.797042	0.373608	0.164825	0.448678	0.0873274	0.705355	1.69617	0.441172	0.194632	0.688325	0.1207	0.143547	0.3711	0.65592	0.0942669	2.55906	0.0528564	0.228072	0.685985	0.143717	0.0206546	0.958593	0.315342	0.357504	0.769634	0.367233	0.13141	0.557249	0.0713548	0.635207	1.42699	0.357838	0.128048	0.808403	0.95546	1.06499	1.78668	0.173538	0.184994	0.0846321	0.096175	2.17207	3.60672	1.06602
20	3	0	0	0.770244	0.913733	2.40221	0.414881	0.379273	0.238241	0.199102	1.50816	3.50735	0.914175	0.835715	0.628238	0.16944	0.224033	0.730738	0.634871	0.142397	1.56305	0.0786332	0.25297	1.33978	0.224293	0.0503074	0.977661	1.13095	1.45853	3.31505	0.267328	0.390359	0.0963569	0.205457	1.61148	6.77812	1.46022	2.13225	0.549203	0.185291	0.234045	0.453934	0.32348	0.0757974	0.748297	0.0410855	0.280277	1.01312	0.234319
20	4	0	0	0.0275829	0.037045	0.0690403	0.377172	0.0139891	5.86063	0.00806203	0.041728	0.208891	0.0370894	0.00137563	0.935039	0.00718356	0.00953261	0.0400111	0.915276	0.00873508	56.8716	0.00517994	0.0114722	0.0787288	0.00954365	9.10813e-05	1.05516	0.0204517	0.0280275	0.113842	0.57832	0.0158718	12.3804	0.00932501	0.0301186	0.176798	0.0274446	0.000753205	1.04001	0.0084653	0.0123025	0.0492926	0.468047	0.00575017	21.6522	0.00326802	0.0117273	0.0831966	0.0122855
20	1	0	0	0.15572	0.180222	0.608342	0.699741	0.126239	2.11427	0.0688131	0.305389	0.850849	0.180408	0.032547	0.832808	0.181135	0.24581	0.683148	0.566193	0.139304	1.23767	0.0749205	0.238186	1.49702	0.246036	0.0605335	0.767373	0.083246	0.119048	0.406835	0.966813	0.115204	4.72203	0.0670475	0.105994	0.879629	0.119159	0.0141989	0.974848	0.0952351	0.120278	0.22871	0.620173	0.0746155	2.87051	0.0415519	0.160057	0.621619	0.120314
20	2	0	0	0.402902	0.480014	1.01954	0.401356	0.192919	0.443704	0.102514	0.750054	1.99546	0.480669	0.231042	0.715667	0.12076	0.171399	0.613981	0.612435	0.105114	2.03335	0.0598984	0.181298	1.48464	0.171633	0.029458	0.986585	0.636424	0.719393	1.35717	0.240052	0.172902	0.175318	0.090953	1.18963	2.90701	0.72027	0.518789	0.573281	0.786418	0.890012	1.64602	0.208812	0.186057	0.123131	0.0977567	1.65441	3.18662	0.891025
20	3	0	0	0.836055	1.02214	3.03844	0.465864	0.476799	0.236197	0.247416	1.46907	4.35173	1.02347	1.0475	0.602189	0.333395	0.422826	1.23966	0.415349	0.175625	0.538464	0.0962725	0.622885	2.18468	0.422837	0.178791	0.80871	1.1351	1.51509	4.10561	0.319938	0.484735	0.109717	0.251856	1.57653	7.68385	1.51509	2.29551	0.504728	0.354242	0.457314	1.03646	0.300061	0.137237	0.347364	0.0726623	0.576146	2.22066	0.457364
20	4	0	0	0.0520317	0.0850687	0.468402	0.260754	0.022098	1.76622	0.012685	0.0686017	0.839609	0.0847468	0.00718203	0.642478	0.0115105	0.0245336	0.114475	0.558098	0.0137063	13.1037	0.00790337	0.0133828	0.341206	0.0245589	0.000603139	0.879514	0.0255362	0.0488024	0.24363	0.547974	0.026763	6.53873	0.0155971	0.0319941	0.675404	0.0488399	0.00238534	0.944585	0.0105568	0.0145953	0.0571048	0.48897	0.00713381	19.0979	0.00406504	0.0150685	0.107174	0.0145895
20	1	0	0	0.226028	0.257083	0.69071	0.660987	0.170101	1.37931	0.0913463	0.424766	1.02575	0.257344	0.066226	0.785267	0.222924	0.315627	0.724402	0.526959	0.166494	0.876679	0.0875151	0.243535	1.61051	0.315952	0.0998256	0.644511	0.114025	0.157862	0.482562	0.867664	0.137128	3.10432	0.0775382	0.169544	1.18064	0.158043	0.0249775	0.851071	0.11813	0.161806	0.346142	0.650536	0.105381	2.28331	0.0599164	0.144019	0.88449	0.161991
20	2	0	0	0.42424	0.492759	1.06266	0.369551	0.182297	0.388143	0.0944506	0.830113	2.04663	0.493295	0.24334	0.625364	0.143353	0.185113	0.458437	0.566145	0.10493	1.66208	0.057095	0.223816	1.03382	0.185342	0.0343516	0.900915	0.337137	0.407845	0.990341	0.366891	0.149818	0.479129	0.0798922	0.576715	1.86171	0.408344	0.166745	0.755544	0.897767	1.02611	2.03488	0.181883	0.1866	0.0906182	0.0953799	1.92017	3.89613	1.02594
20	3	0	0	0.799308	0.945765	2.56608	0.468835	0.443954	0.257336	0.230747	1.57415	3.96725	0.946929	0.896675	0.681491	0.228858	0.296585	0.716586	0.517373	0.153622	0.934009	0.0823478	0.375412	1.67231	0.296928	0.088166	0.821194	1.22007	1.54614	3.35398	0.287743	0.445447	0.0964078	0.231043	1.82222	7.26862	1.54807	2.39652	0.553913	0.419872	0.492287	0.978197	0.281759	0.13888	0.301657	0.0732881	0.905763	2.15354	0.492902
20	4	0	0	0.0295213	0.0434213	0.100936	0.362017	0.015727	4.90225	0.00925193	0.0380457	0.286836	0.0434428	0.00188728	0.874556	0.0104559	0.0137941	0.059589	0.874797	0.0120764	36.523	0.00696026	0.0169229	0.113652	0.0138048	0.000190572	1.0948	0.020443	0.0313832	0.151977	0.572633	0.0178436	10.8765	0.0105609	0.0251494	0.245207	0.0311607	0.000970986	0.962756	0.00922276	0.0139969	0.0544802	0.47239	0.00655415	19.2334	0.00370243	0.0122987	0.0888844	0.0138744
20	1	0	0	0.185793	0.223045	0.669267	0.648997	0.144967	1.58311	0.0789883	0.316118	0.986538	0.223371	0.0498945	0.764688	0.192797	0.26789	0.631192	0.518501	0.139092	1.03347	0.0743711	0.210302	1.50941	0.268258	0.0719624	0.675321	0.10215	0.140088	0.427752	0.844255	0.118428	3.33126	0.0655496	0.136775	0.931211	0.140275	0.0196771	0.785544	0.111047	0.147724	0.316092	0.704397	0.10418	2.75634	0.0602926	0.155265	0.876843	0.147899
20	2	0	0	0.462924	0.539597	0.981747	0.404146	0.218292	0.38976	0.113709	0.897134	2.16088	0.540131	0.291741	0.711527	0.134614	0.179302	0.507053	0.636214	0.114165	2.01002	0.0647232	0.219461	1.18068	0.179444	0.0322002	0.937756	0.698201	0.796645	1.52017	0.231362	0.184525	0.154005	0.0979631	1.38838	3.10799	0.79756	0.636102	0.618471	0.817129	0.92527	1.49358	0.218012	0.201947	0.123555	0.106017	1.76842	3.18821	0.926311
20	3	0	0	0.71087	0.891914	2.61696	0.482908	0.430769	0.285183	0.226925	1.21227	4.13696	0.892031	0.795719	0.730036	0.387804	0.467123	1.00737	0.420014	0.196404	0.489463	0.107027	0.695367	2.4982	0.467614	0.218663	0.886256	1.14195	1.45961	4.12365	0.288452	0.421461	0.103779	0.221553	1.66129	7.81348	1.46111	2.13485	0.565068	0.32981	0.402655	0.725982	0.28287	0.114024	0.373721	0.0607243	0.651505	1.83503	0.403095
20	4	0	0	0.0243186	0.0377422	0.0631914	0.315509	0.0118093	4.92915	0.00690557	0.0299352	0.23023	0.0374295	0.00140097	0.831489	0.00795798	0.0108088	0.0466446	0.893488	0.00961366	46.9414	0.00543446	0.0118291	0.0812251	0.0107597	0.000115771	0.998325	0.0231599	0.033688	0.144172	0.396434	0.0127515	7.22255	0.00747254	0.034881	0.193554	0.0321654	0.00103461	0.954381	0.00782743	0.0128182	0.0655062	0.412364	0.00513854	18.9031	0.00293529	0.00974296	0.0841004	0.0124612
20	1	0	0	0.219784	0.256924	0.819844	0.621048	0.159745	1.29068	0.085393	0.409158	1.17916	0.257218	0.0661613	0.717525	0.21828	0.306347	0.734311	0.503625	0.154455	0.863218	0.0811911	0.22002	1.63814	0.306686	0.0940564	0.640388	0.13307	0.185098	0.706919	0.723949	0.134118	2.17488	0.0746437	0.173187	1.34401	0.185259	0.0343209	0.849376	0.113494	0.14941	0.363611	0.766538	0.114609	2.90226	0.0648791	0.170082	0.83661	0.149515
20	2	0	0	0.447773	0.540172	1.05689	0.492248	0.266282	0.479432	0.140295	0.891006	2.09768	0.540952	0.292629	0.65301	0.214858	0.263935	0.623405	0.581842	0.153775	1.20337	0.0840543	0.37408	1.41826	0.26429	0.069849	0.693481	0.703539	0.836279	1.87805	0.32099	0.264229	0.213041	0.144358	1.11128	3.33406	0.82317	0.677609	0.578521	0.78155	0.887736	1.44324	0.260529	0.228702	0.158172	0.121887	1.57809	3.04719	0.877837
20	3	0	0	0.71503	0.857567	2.21007	0.451031	0.38734	0.274271	0.202279	1.32827	3.44062	0.858788	0.737517	0.698047	0.372821	0.449868	1.07333	0.434239	0.19558	0.522242	0.105941	0.662462	2.1021	0.450397	0.202857	0.752016	1.0542	1.36241	3.40163	0.285012	0.388826	0.108693	0.202296	1.48383	6.29285	1.36424	1.86116	0.552283	0.380029	0.466314	0.97269	0.258349	0.120585	0.29732	0.0647731	0.757007	2.34474	0.466751
20	4	0	0	0.0250571	0.0374183	0.146102	0.417546	0.0156109	6.5709	0.00918481	0.0391035	0.327392	0.0373872	0.0013978	0.865265	0.0084363	0.0146569	0.116138	0.692689	0.0101604	27.2427	0.00586135	0.0109449	0.199775	0.0146681	0.000215153	0.981493	0.0241046	0.0374532	0.210365	0.48872	0.0181039	7.74197	0.0106237	0.0287368	0.380307	0.0370435	0.00137222	0.833593	0.00745372	0.00939017	0.0253593	0.567852	0.00531745	34.0067	0.00298195	0.01321	0.0599868	0.00936414
21	1	0	0	0.265543	0.31484	0.841794	0.707605	0.222723	1.25118	0.123956	0.464437	1.42673	0.314756	0.0990712	0.848268	0.252096	0.368342	1.18638	0.693855	0.255941	1.04064	0.141593	0.280625	2.21193	0.368868	0.136063	0.824859	0.19387	0.269216	0.868185	1.0149	0.273197	2.24974	0.163019	0.246795	1.65891	0.269186	0.0724612	0.727051	0.0849179	0.112831	0.476857	0.95958	0.108006	4.9604	0.0628419	0.129594	0.746259	0.112555
21	2	0	0	0.522755	0.601693	1.32379	0.378794	0.228188	0.328619	0.119253	1.03918	2.31779	0.602406	0.362893	0.685336	0.491554	0.599273	1.41596	0.34985	0.209839	0.313515	0.11279	0.972663	3.02418	0.599799	0.359759	0.684448	0.230531	0.303789	1.05047	0.601718	0.182974	1.08416	0.10025	0.366728	2.0689	0.304085	0.092468	0.892932	0.811692	0.976963	2.28153	0.222817	0.217925	0.118234	0.113099	1.60099	4.06583	0.978044
21	3	0	0	0.731336	0.910945	3.59291	0.310871	0.283467	0.179676	0.149395	1.28859	4.98791	0.911848	0.831467	0.650149	0.838864	1.14062	2.7475	0.245996	0.280931	0.116645	0.152128	1.18858	6.63881	1.14201	1.3042	0.544417	0.602065	0.840987	3.04039	0.254338	0.214153	0.165403	0.117266	0.800202	5.16812	0.842003	0.708969	0.559794	0.178371	0.272925	0.640108	0.484324	0.132232	0.965976	0.0720056	0.224776	2.4154	0.273023
21	4	0	0	0.0309672	0.0398722	0.140396	0.463815	0.0177876	6.8128	0.01002	0.0546561	0.243992	0.0383506	0.00147077	0.925511	0.0176632	0.023277	0.0694149	0.741554	0.0171767	18.1521	0.00973917	0.0287124	0.165753	0.0231631	0.00053653	1.0012	0.0228235	0.0294173	0.0773291	0.75143	0.0221173	14.3024	0.0123908	0.0338026	0.170658	0.0294337	0.000866342	0.962558	0.0133194	0.0171641	0.0569265	0.746991	0.0127912	25.4582	0.00746481	0.0207511	0.101538	0.0171236
21	1	0	0	0.226835	0.272308	1.03429	0.648168	0.17669	1.30009	0.0966103	0.406318	1.58094	0.272599	0.0743103	0.886123	0.226759	0.320727	1.00282	0.600618	0.192867	1.0372	0.106951	0.284656	1.83357	0.321115	0.103115	0.786155	0.17762	0.249451	0.881922	1.0322	0.257754	2.45179	0.152884	0.230429	1.88258	0.249712	0.062356	0.798438	0.0935128	0.124447	0.419819	0.769207	0.0958202	3.49396	0.0542183	0.13131	0.839632	0.12457
21	2	0	0	0.491663	0.571104	1.33805	0.384469	0.219779	0.355617	0.116207	0.973464	2.35829	0.571642	0.326775	0.766064	0.441128	0.562801	1.4539	0.390079	0.219624	0.371018	0.117611	0.768503	3.02121	0.563024	0.316996	0.754177	0.292752	0.382372	1.07373	0.576488	0.220579	0.816417	0.119525	0.461164	2.4753	0.382626	0.146402	0.854958	0.795178	0.94463	1.87883	0.194665	0.184074	0.106308	0.0950544	1.44515	3.96953	0.945589
21	3	0	0	0.638352	0.797757	2.92339	0.311132	0.248421	0.207022	0.131979	1.20027	3.87901	0.798445	0.637514	0.620665	0.631878	0.833516	1.65452	0.273119	0.227817	0.180273	0.125429	1.12934	4.27952	0.83413	0.695773	0.628655	0.563568	0.827215	3.28823	0.283983	0.235132	0.184968	0.126805	0.652509	5.23102	0.827981	0.685553	0.645132	0.210518	0.333052	0.826173	0.395581	0.131869	0.652802	0.0725428	0.222692	2.46268	0.333355
21	4	0	0	0.0228641	0.0288595	0.0748982	0.603398	0.0170737	12.3434	0.00988283	0.0382202	0.150427	0.0282958	0.000800654	1.04728	0.0159958	0.0238999	0.122151	0.637286	0.0150952	15.7025	0.00881011	0.0210741	0.197445	0.0236868	0.000561062	1.00701	0.0210808	0.0272306	0.0705374	0.739219	0.0197429	16.0922	0.0114786	0.0332412	0.180974	0.0267078	0.000713306	1.03986	0.0125244	0.0157994	0.0497895	0.746182	0.0116142	27.227	0.00659616	0.0215996	0.0923121	0.0155649
21	1	0	0	0.240616	0.30313	1.06321	0.600844	0.182311	1.09656	0.100957	0.410505	1.44679	0.303426	0.0920672	0.775445	0.254651	0.355554	0.997853	0.461678	0.16436	0.689098	0.0873359	0.286991	2.01519	0.356005	0.12674	0.693571	0.194906	0.281248	0.667103	0.754082	0.212349	1.48199	0.117519	0.22069	1.74404	0.2816	0.0792985	0.720494	0.0838294	0.117529	0.379336	0.746848	0.0878887	3.45399	0.0478324	0.107149	0.830235	0.117679
21	2	0	0	0.456908	0.541385	1.36552	0.36298	0.196704	0.351496	0.103224	0.855608	2.41885	0.541914	0.29367	0.746307	0.530073	0.635305	1.8504	0.266938	0.169762	0.226549	0.0916266	1.00053	3.29025	0.635959	0.404444	0.65968	0.367109	0.456731	1.00829	0.380189	0.173821	0.44355	0.0927142	0.640849	2.3868	0.457195	0.209028	0.756216	0.729842	0.848785	1.54809	0.173843	0.147677	0.104881	0.0756841	1.42481	3.45727	0.849482
21	3	0	0	0.588421	0.734171	2.77683	0.360981	0.265137	0.26695	0.144014	1.0872	3.75457	0.734492	0.539478	0.689866	0.683133	0.89337	1.82107	0.272508	0.243598	0.167329	0.133708	1.25287	4.93445	0.89391	0.799075	0.63839	0.530192	0.752352	2.67999	0.314079	0.23642	0.222885	0.12629	0.64152	4.81385	0.752738	0.566615	0.632117	0.226549	0.328843	0.849282	0.415035	0.136633	0.679852	0.0736809	0.319881	2.37932	0.329208
21	4	0	0	0.0329788	0.0426188	0.164368	0.44559	0.0188338	5.95738	0.010643	0.0576907	0.296163	0.0422672	0.00178652	0.887931	0.0189356	0.0263671	0.130717	0.652296	0.0170382	14.1273	0.00963873	0.0276069	0.206516	0.0261204	0.000682277	0.973598	0.0279634	0.0360074	0.105997	0.576984	0.0205678	9.17669	0.0116609	0.0496254	0.257538	0.035647	0.00127071	0.991502	0.00948	0.012129	0.0406535	0.562741	0.00674873	25.8423	0.00371671	0.0158311	0.0712096	0.0119926
21	1	0	0	0.19181	0.245	0.971106	0.618473	0.151733	1.35539	0.0815804	0.3214	1.38259	0.245336	0.0601895	0.851617	0.214705	0.285075	0.972173	0.458822	0.130974	0.850044	0.0692669	0.328954	1.87323	0.285458	0.0814862	0.725903	0.178809	0.249625	0.872996	0.78495	0.196191	1.74608	0.109078	0.247471	1.9194	0.24994	0.06247	0.804036	0.0764566	0.105922	0.476572	0.6365	0.0675092	3.35305	0.0377197	0.102694	0.777442	0.106063
21	2	0	0	0.524298	0.608065	1.73844	0.378047	0.229994	0.325167	0.12035	1.03724	2.7666	0.608374	0.370118	0.661391	0.543671	0.65248	1.58312	0.293696	0.191811	0.238388	0.10168	1.04749	3.10799	0.653094	0.426532	0.690783	0.516096	0.641772	1.37238	0.32348	0.207795	0.268112	0.110635	0.912792	3.60012	0.642375	0.412646	0.705417	0.682804	0.812953	1.4398	0.206961	0.168366	0.131484	0.0870178	1.34483	3.06813	0.813518
21	3	0	0	0.447356	0.546432	1.52836	0.431368	0.236027	0.42255	0.126505	0.831816	2.42179	0.54716	0.299384	0.719811	0.595726	0.74573	1.68639	0.309328	0.230982	0.22398	0.12489	1.00268	3.56174	0.746722	0.557593	0.663808	0.450033	0.610876	1.79074	0.311193	0.190335	0.274693	0.10276	0.625416	3.26263	0.611628	0.374089	0.640914	0.169032	0.250522	0.612764	0.360074	0.090322	0.79075	0.0497558	0.227729	1.98052	0.250843
21	4	0	0	0.0240501	0.0310207	0.163362	0.646554	0.0192407	12.5531	0.0111169	0.0426409	0.223579	0.0297589	0.000885591	1.09146	0.0161988	0.023562	0.0716598	0.599285	0.0141122	14.3774	0.00797262	0.0198981	0.183123	0.0235483	0.000554524	0.944276	0.0200049	0.0318819	0.255241	0.723956	0.0230458	13.1669	0.0133427	0.0263785	0.32615	0.0318332	0.00101335	1.04531	0.0105554	0.0161659	0.0598275	0.627304	0.0101516	22.5306	0.00590043	0.0146966	0.181877	0.0161829
21	1	0	0	0.182526	0.222692	0.741313	0.614326	0.13671	1.52665	0.0756033	0.347492	1.03378	0.222536	0.0495225	0.85164	0.214425	0.290605	0.972145	0.584268	0.169968	1.1117	0.0940803	0.312705	1.81515	0.290908	0.0846275	0.777827	0.11696	0.170374	0.539128	0.937133	0.159827	3.17982	0.0924915	0.136282	1.15407	0.170549	0.029087	0.830035	0.0846235	0.115054	0.2997	0.829852	0.0955648	4.10828	0.0544822	0.116397	0.743202	0.115159
21	2	0	0	0.462017	0.55197	1.48679	0.384026	0.212249	0.370963	0.113319	0.83892	2.49843	0.552696	0.305473	0.719269	0.636947	0.751928	1.55549	0.267386	0.201287	0.193303	0.109545	1.20276	3.56166	0.752795	0.5667	0.652799	0.371622	0.46797	1.40974	0.344134	0.161235	0.394407	0.0865777	0.664246	2.61601	0.468523	0.219513	0.711385	0.564138	0.687629	1.11061	0.208358	0.143458	0.156877	0.0743682	1.02351	2.93232	0.688517
21	3	0	0	0.769155	0.917586	2.93597	0.394027	0.361759	0.228199	0.192353	1.47744	4.11565	0.918107	0.84292	0.730352	0.846096	1.10457	2.58176	0.304802	0.336946	0.149055	0.18215	1.43218	5.62306	1.10546	1.22204	0.631111	0.612682	0.877726	3.22226	0.310634	0.272759	0.190731	0.147055	0.746083	5.86311	0.878072	0.77101	0.611159	0.260659	0.416815	1.25391	0.433681	0.180916	0.565306	0.0983776	0.266015	3.54421	0.417163
21	4	0	0	0.0300647	0.0402882	0.176444	0.420856	0.0158275	6.54581	0.00925807	0.0564163	0.242203	0.0376079	0.00141435	0.908431	0.0138019	0.0205582	0.10375	0.867596	0.0178378	24.918	0.0105333	0.0194792	0.228974	0.0205601	0.000422716	1.04367	0.0175659	0.0251482	0.12831	0.742656	0.0182808	17.5486	0.010633	0.0270585	0.234009	0.0246154	0.000605917	1.07009	0.0118615	0.0156988	0.0487534	0.706112	0.0108698	26.0802	0.00618025	0.0180547	0.10777	0.0153938
22	1	0	0	0.324146	0.399937	1.38518	0.664043	0.265762	0.893015	0.143038	0.499858	1.87126	0.400218	0.160174	0.744413	0.230123	0.366019	1.42704	0.588777	0.21568	0.897992	0.120501	0.233969	2.53644	0.366319	0.13419	0.750558	0.248537	0.37195	1.26706	0.616886	0.229697	0.944369	0.130931	0.245116	2.42007	0.37235	0.138644	0.764761	0.0977712	0.135246	0.320495	0.859859	0.116094	3.70644	0.0675651	0.133753	1.03878	0.135015
22	2	0	0	0.42841	0.498482	1.03923	0.341067	0.170193	0.354181	0.0881917	0.844056	2.11202	0.499001	0.249002	0.590016	0.429445	0.533956	1.39686	0.27356	0.146221	0.274259	0.0783564	0.819327	2.59972	0.534512	0.285703	0.670496	0.169838	0.212844	0.725136	0.655657	0.139696	1.75738	0.0797771	0.295147	1.20909	0.213062	0.0453955	0.991334	0.92462	1.04958	2.17085	0.16403	0.172339	0.0794937	0.0877517	1.92379	3.79044	1.05066
22	3	0	0	1.24818	1.45172	3.86635	0.49789	0.722815	0.178633	0.376487	2.44707	6.03393	1.45176	2.1076	0.706187	1.22803	1.4498	2.81537	0.3271	0.474545	0.119608	0.25174	2.27669	6.10027	1.45076	2.10471	0.680362	1.70789	2.12377	4.43609	0.310293	0.659331	0.0753656	0.340281	3.06022	9.13085	2.12487	4.51507	0.590746	0.302608	0.389205	0.938317	0.589604	0.229729	0.805832	0.122337	0.48329	2.19681	0.389633
22	4	0	0	0.044817	0.0581709	0.149575	0.22465	0.0122909	2.38213	0.00713046	0.0793041	0.294283	0.0547112	0.00299332	0.658811	0.0128419	0.01816	0.083246	0.652892	0.0118172	21.3257	0.00698634	0.0194341	0.17886	0.0180998	0.000327603	1.0324	0.0192251	0.0261428	0.133884	0.506385	0.0132545	11.562	0.00792129	0.0301852	0.212631	0.0261747	0.000685114	1.02118	0.0107053	0.013565	0.0414715	0.458365	0.00606356	19.4283	0.0033999	0.0184666	0.0637121	0.0132287
22	1	0	0	0.17537	0.220204	1.02809	0.710155	0.156553	1.74039	0.0845788	0.279191	1.46178	0.220448	0.0485975	0.81933	0.13294	0.198861	0.869145	0.680801	0.13552	1.92722	0.0763653	0.160359	1.95049	0.19906	0.0396247	0.959417	0.167552	0.245948	0.733581	0.705867	0.173779	1.59899	0.0969159	0.186111	1.85215	0.246192	0.0606107	0.858743	0.0698796	0.0935916	0.235861	0.779699	0.0730173	4.72691	0.0414548	0.0940911	0.603468	0.0936481
22	2	0	0	0.378379	0.448179	0.802446	0.375882	0.168565	0.430805	0.0866385	0.663646	1.83464	0.448451	0.201108	0.659103	0.370817	0.472907	1.07264	0.292789	0.138594	0.330993	0.0741646	0.59802	2.0574	0.473357	0.224067	0.674804	0.140676	0.183647	0.535198	0.657374	0.120814	2.07174	0.069975	0.216738	1.32317	0.183782	0.033776	1.13549	0.977711	1.07696	1.88525	0.157286	0.169497	0.0737916	0.0856937	2.08493	3.69864	1.07763
22	3	0	0	1.20889	1.46421	4.14571	0.489411	0.717103	0.172384	0.370095	2.14233	6.23679	1.46524	2.14692	0.674343	1.17363	1.43539	2.82794	0.326078	0.468526	0.119815	0.247364	1.92165	6.86806	1.43685	2.06455	0.613218	1.55116	2.01582	4.84285	0.325612	0.656889	0.0841546	0.3425	2.52455	8.93368	2.0174	4.06989	0.550263	0.38343	0.544334	1.85681	0.499415	0.271739	0.493749	0.14618	0.501848	3.8373	0.544115
22	4	0	0	0.0413247	0.0545585	0.147347	0.269301	0.0141314	3.05797	0.00842029	0.0667218	0.26725	0.0524743	0.00275355	0.835209	0.0158439	0.0211393	0.0748708	0.654668	0.0137723	18.4669	0.00817262	0.0254612	0.159782	0.021037	0.000442556	1.05749	0.0238817	0.032019	0.0976145	0.509113	0.0160736	9.90577	0.00987383	0.0322255	0.234478	0.0315718	0.000996776	1.05739	0.0112986	0.015443	0.0641828	0.50019	0.00771623	18.3673	0.00437105	0.015531	0.114258	0.0154266
22	1	0	0	0.207297	0.252486	0.80288	0.738429	0.186533	1.5705	0.100215	0.338212	1.22569	0.252608	0.0638107	0.911656	0.178732	0.246309	0.93262	0.679991	0.167565	1.55356	0.0943381	0.211998	1.65184	0.246422	0.0607238	0.917546	0.231166	0.31206	1.09444	0.628702	0.196363	1.10856	0.108141	0.343725	1.78804	0.312331	0.0975508	0.896536	0.101368	0.149513	0.348961	0.755214	0.112914	2.9337	0.0655805	0.118249	1.01175	0.149513
22	2	0	0	0.41989	0.494859	1.11356	0.354838	0.175781	0.376328	0.0923527	0.78094	2.13786	0.495383	0.245404	0.702858	0.441745	0.548853	1.71759	0.314195	0.172628	0.305793	0.0923107	0.794289	2.80005	0.54943	0.301873	0.721332	0.183054	0.238226	0.770042	0.62986	0.150109	1.47508	0.08378	0.279055	1.54703	0.238321	0.0567968	0.98523	0.912906	1.04404	1.96896	0.165511	0.172969	0.0819108	0.0894594	1.94603	3.76942	1.04506
22	3	0	0	1.28773	1.50782	3.97682	0.490549	0.740425	0.16725	0.381033	2.41953	6.20999	1.50938	2.27823	0.670608	1.25608	1.5298	2.86952	0.340546	0.521489	0.118724	0.278404	2.27276	6.63207	1.53133	2.34497	0.686702	1.51321	1.98968	4.4495	0.33726	0.671786	0.0876544	0.34778	2.46245	8.90369	1.99189	3.96763	0.55882	0.375456	0.56151	1.59187	0.51064	0.287044	0.480697	0.151894	0.469329	3.84693	0.562127
22	4	0	0	0.0324508	0.042536	0.10756	0.279992	0.0107693	4.4057	0.00651775	0.0645025	0.170426	0.0384628	0.00147939	0.838873	0.0122848	0.0155944	0.0348444	0.790695	0.0123432	30.3485	0.00739561	0.0206675	0.100566	0.0156106	0.00024369	1.07236	0.0150147	0.0192167	0.0497328	0.617735	0.0118837	19.5752	0.00724445	0.02471	0.113515	0.0192375	0.000370083	1.07137	0.0116769	0.016561	0.0507548	0.400605	0.00641048	14.4075	0.00368924	0.0164863	0.0827934	0.016002
22	1	0	0	0.343039	0.409953	1.51771	0.696813	0.285763	0.910941	0.153204	0.580588	2.16655	0.4101	0.168182	0.780761	0.30598	0.436994	1.63213	0.611681	0.267582	0.772542	0.147838	0.360387	2.51871	0.437454	0.191366	0.868098	0.263231	0.380224	1.4792	0.703869	0.267897	1.04783	0.151791	0.300498	2.35789	0.380607	0.144862	0.873578	0.125889	0.190454	0.317621	0.743716	0.141675	2.2382	0.0812214	0.143032	1.35464	0.190496
22	2	0	0	0.44599	0.519784	1.24636	0.319242	0.166059	0.319992	0.0865812	0.880661	2.25697	0.520167	0.270573	0.615734	0.379145	0.494172	1.34225	0.311372	0.153993	0.332993	0.0814476	0.61518	2.63192	0.494563	0.244592	0.67473	0.164662	0.233438	0.6577	0.610778	0.142699	1.46195	0.0798011	0.256426	2.21785	0.233635	0.0545855	1.03243	0.88352	1.0224	2.12625	0.165639	0.169489	0.0832871	0.0872041	1.88632	3.92855	1.02324
22	3	0	0	1.1561	1.40935	5.11135	0.522265	0.736561	0.19298	0.383837	2.07213	7.18518	1.41032	1.98901	0.716016	0.977206	1.2563	3.39496	0.370604	0.46575	0.157445	0.248665	1.51407	8.3399	1.25673	1.57938	0.646582	1.51397	1.97169	5.72166	0.356943	0.704354	0.0942126	0.366854	2.30167	11.2823	1.9733	3.8939	0.59686	0.28281	0.395866	1.46472	0.660707	0.261842	0.924404	0.145185	0.413923	3.37246	0.396306
22	4	0	0	0.0375453	0.0509973	0.15571	0.261405	0.0126921	3.15298	0.00743296	0.0611016	0.213536	0.0485534	0.00235744	0.822453	0.0121153	0.015703	0.0536607	0.891584	0.0137887	34.4392	0.00823714	0.0172338	0.107296	0.0154654	0.000239179	1.06829	0.013444	0.0173597	0.0724873	0.896874	0.015509	30.7703	0.00920098	0.0221031	0.119719	0.0172922	0.000299022	1.09623	0.00886872	0.0116567	0.0298957	0.552637	0.00644929	27.1231	0.00369388	0.0133923	0.0727577	0.01167
22	1	0	0	0.249588	0.323263	1.56346	0.690898	0.223573	1.16471	0.121963	0.408831	2.15577	0.323597	0.104715	0.856644	0.274249	0.369168	1.46971	0.654961	0.242046	1.00029	0.136613	0.41125	2.33346	0.369557	0.136573	0.930706	0.219749	0.298879	1.07247	0.880132	0.263327	1.76934	0.158381	0.302062	1.81234	0.29919	0.0895145	0.938855	0.0826989	0.119616	0.371619	0.870738	0.104154	4.18071	0.0598175	0.113249	1.03198	0.119616
22	2	0	0	0.433955	0.534984	2.31845	0.310656	0.166308	0.304474	0.0872605	0.821784	3.62212	0.535345	0.286595	0.612878	0.431148	0.544022	1.94801	0.305745	0.166412	0.301258	0.0892463	0.732485	3.3497	0.544285	0.296246	0.701352	0.227614	0.362173	1.38501	0.455063	0.16497	0.691072	0.0908214	0.338244	3.80026	0.36252	0.131421	0.818064	0.790459	0.940269	2.30842	0.16048	0.150821	0.0870683	0.0769029	1.55948	4.41529	0.939813
22	3	0	0	1.362	1.56943	4.02133	0.53546	0.841293	0.176935	0.436771	2.61933	6.26515	1.57116	2.46854	0.675449	1.17215	1.46454	3.34362	0.374433	0.548979	0.134807	0.289786	1.97269	6.97671	1.46616	2.14963	0.685241	1.62112	2.1319	4.82092	0.366744	0.782731	0.0890305	0.405544	2.47055	9.98895	2.13427	4.55511	0.54534	0.351721	0.467589	1.60573	0.642731	0.300868	0.748279	0.163967	0.549231	3.86973	0.468109
22	4	0	0	0.0470372	0.0635802	0.147105	0.266637	0.0169209	2.54236	0.0102386	0.0807212	0.414767	0.0634604	0.00402723	0.772663	0.0149645	0.0231053	0.116173	0.663512	0.0147443	18.4418	0.00910652	0.0199814	0.210094	0.0222216	0.000493799	1.09538	0.0222028	0.0322553	0.169913	0.623014	0.0195986	12.0023	0.0118773	0.0316893	0.319433	0.0314577	0.000989585	1.13905	0.0138092	0.0190169	0.0736357	0.52159	0.00961853	16.0014	0.00544148	0.0204726	0.164945	0.0184408
23	1	0	0	0.216958	0.257579	0.789623	0.723289	0.186508	1.51996	0.101065	0.401254	1.18869	0.25786	0.0664919	0.768963	0.21099	0.287015	0.600548	0.525226	0.150882	0.979021	0.0807928	0.325479	1.44184	0.28727	0.082524	0.716816	0.244338	0.316342	0.838612	0.814999	0.257944	1.49073	0.149326	0.367151	1.68382	0.316496	0.10017	0.866669	0.0593485	0.0810888	0.237204	0.865818	0.0702375	6.22586	0.0409717	0.0948727	0.668675	0.0811227
23	2	0	0	0.291515	0.346753	1.05158	0.457298	0.158535	0.710108	0.0853443	0.546004	1.73903	0.346677	0.120185	0.855278	0.608733	0.698033	1.10456	0.235917	0.164789	0.177415	0.0865622	1.35375	2.60882	0.698505	0.487909	0.622677	0.112558	0.153846	0.576857	0.842916	0.129796	3.15855	0.0748935	0.166038	1.51651	0.153985	0.0237113	1.13407	0.34662	0.411126	0.900988	0.306252	0.126013	0.396755	0.0671729	0.674006	1.72698	0.411468
23	3	0	0	0.805161	0.941429	2.02643	0.385629	0.36319	0.214244	0.190036	1.59831	3.6782	0.941812	0.88701	0.746787	1.09091	1.25073	2.36352	0.233521	0.292004	0.101712	0.159037	2.35952	4.86895	1.25044	1.5636	0.58018	1.0919	1.35391	2.43621	0.229569	0.310576	0.0894266	0.163673	1.7024	5.42671	1.35287	1.83025	0.551814	0.409412	0.550147	1.61217	0.443804	0.244352	0.437877	0.13274	0.609519	4.01706	0.550585
23	4	0	0	0.0417598	0.0602825	0.139099	0.216429	0.0129712	2.10401	0.00755756	0.0672565	0.377932	0.0599331	0.00359197	0.6398	0.0247525	0.0413047	0.213574	0.352368	0.0143719	5.09206	0.00847091	0.0278498	0.281562	0.0407867	0.00166355	0.845602	0.017341	0.0290178	0.0489922	0.446912	0.012561	9.40836	0.00743218	0.0203326	0.26862	0.0281061	0.000789956	0.976156	0.0183657	0.0262794	0.143136	0.346298	0.00909038	7.4093	0.00510554	0.0241987	0.200679	0.0262502
23	1	0	0	0.233707	0.28174	0.97792	0.719931	0.202848	1.39357	0.110635	0.410853	1.63087	0.281761	0.0793891	0.799517	0.217309	0.28114	0.721902	0.630819	0.177438	1.23905	0.0980328	0.324622	1.48448	0.281282	0.0791195	0.843452	0.243485	0.316955	1.02101	0.891734	0.282818	1.61213	0.16216	0.369425	2.22595	0.317155	0.100587	0.773423	0.0585566	0.0797623	0.407416	0.78479	0.0621785	5.79522	0.0363784	0.0888132	0.595315	0.0792295
23	2	0	0	0.324292	0.38475	1.05328	0.670161	0.257985	0.972224	0.144077	0.574318	1.95996	0.384959	0.148194	0.857655	0.674546	0.766721	1.29934	0.276729	0.211935	0.198043	0.11616	1.44714	2.73342	0.765858	0.586539	0.696928	0.13869	0.187224	0.786605	0.907238	0.169764	2.86594	0.10035	0.200729	1.34705	0.187122	0.0350147	0.955076	0.478228	0.567693	1.86746	0.431956	0.245163	0.430749	0.138757	0.877308	2.92725	0.567566
23	3	0	0	0.700362	0.82639	2.54382	0.540689	0.447219	0.355933	0.243508	1.29606	4.24382	0.827128	0.684141	0.884591	0.738294	0.879026	1.7366	0.322738	0.283927	0.20201	0.156345	1.47696	4.04256	0.879744	0.773949	0.757678	1.02034	1.27095	2.80376	0.309689	0.39376	0.131853	0.213157	1.86241	5.47789	1.27147	1.61663	0.715015	0.411175	0.652312	1.49096	0.457405	0.298617	0.383655	0.163519	0.499226	5.24119	0.65285
23	4	0	0	0.0350372	0.0477675	0.118406	0.266875	0.0124833	3.39844	0.00743578	0.0554833	0.305605	0.046776	0.002188	0.83239	0.0185187	0.0277847	0.0951011	0.348171	0.00952376	7.65124	0.00572485	0.0244734	0.211811	0.0273537	0.000748225	0.947413	0.0145581	0.019539	0.0892419	0.68039	0.0132564	20.9377	0.00794817	0.0220651	0.139944	0.0194836	0.00037961	1.19491	0.0134868	0.0205992	0.0544577	0.275868	0.00568212	7.90922	0.00335545	0.0159958	0.132597	0.0205972
23	1	0	0	0.21575	0.267599	1.03864	0.692717	0.185443	1.39833	0.100212	0.36871	1.46794	0.267704	0.0716656	0.891875	0.202268	0.278533	0.745006	0.630542	0.175734	1.24634	0.0968101	0.258915	1.76803	0.278703	0.0776756	0.933125	0.241338	0.32557	0.880121	0.685363	0.22327	1.15953	0.123055	0.326014	2.06995	0.325769	0.106125	0.979094	0.0651702	0.0857178	0.293094	0.870079	0.0746261	5.7504	0.0423021	0.103759	0.688375	0.0857693
23	2	0	0	0.306184	0.376338	1.18539	0.639568	0.240769	0.950008	0.134634	0.56596	2.09147	0.376455	0.141719	0.834624	0.590567	0.670546	1.11733	0.280626	0.188303	0.233745	0.105245	1.22014	2.5898	0.671011	0.450255	0.75654	0.163482	0.219661	0.779432	0.813854	0.178786	2.1424	0.103389	0.23314	1.40134	0.219678	0.0482586	1.05631	0.532858	0.63474	1.97127	0.412554	0.261943	0.366233	0.147642	1.03431	3.25104	0.63493
23	3	0	0	0.839178	0.953623	1.99895	0.499081	0.476385	0.283661	0.258448	1.72165	3.70556	0.954524	0.911116	0.8147	0.82316	0.990163	1.87279	0.321822	0.318932	0.178043	0.17486	1.57511	4.23665	0.991019	0.982119	0.699161	1.07564	1.36927	2.79374	0.292094	0.400377	0.114727	0.215556	2.02106	5.68289	1.37071	1.87885	0.615827	0.453491	0.664327	1.84569	0.481826	0.320417	0.391404	0.173092	0.568549	4.47745	0.665005
23	4	0	0	0.0339887	0.0446913	0.114311	0.313079	0.0129513	4.45881	0.00763019	0.0690396	0.21539	0.0413674	0.00171126	0.864128	0.0152836	0.0202018	0.0295722	0.549354	0.0107367	16.767	0.00640463	0.0266826	0.10247	0.0195443	0.000381978	1.03433	0.0154735	0.0189067	0.0420239	0.696292	0.0131503	22.0266	0.00785659	0.0278496	0.0936335	0.0188862	0.000356687	1.11157	0.0129325	0.0180705	0.0560066	0.328153	0.0059172	10.7	0.00347905	0.0180552	0.105368	0.0180318
23	1	0	0	0.178531	0.225871	0.867576	0.732561	0.165529	1.76048	0.0898865	0.29591	1.22206	0.22596	0.0510578	0.84837	0.183487	0.244433	0.585238	0.601896	0.147198	1.35004	0.0807434	0.255444	1.30411	0.244557	0.0598083	0.883424	0.209651	0.282357	0.867076	0.681782	0.19267	1.31833	0.105284	0.301063	1.89569	0.282598	0.0798617	0.96106	0.0477413	0.0617404	0.216285	0.980421	0.06059	9.08116	0.0346831	0.0754372	0.428062	0.0618
23	2	0	0	0.303544	0.367768	0.882141	0.465765	0.171451	0.681081	0.0922885	0.53925	1.64835	0.368107	0.135503	0.807753	0.643954	0.729888	1.00256	0.220043	0.160764	0.163246	0.0871376	1.41394	2.52121	0.730603	0.533781	0.581689	0.12318	0.17103	0.527705	0.841723	0.144067	2.85657	0.0836828	0.191169	1.53757	0.171158	0.0292949	1.10195	0.495111	0.561711	0.999852	0.270817	0.152267	0.261535	0.0826785	1.01012	1.92284	0.562252
23	3	0	0	0.747777	0.884573	1.87113	0.426432	0.377499	0.25233	0.197743	1.38602	3.57018	0.885251	0.78367	0.791957	1.03323	1.17964	2.03246	0.262565	0.309976	0.117794	0.164175	2.15578	4.48253	1.18057	1.39375	0.613183	1.12125	1.37789	2.8804	0.26218	0.361558	0.100873	0.191837	1.93295	5.61988	1.37905	1.90177	0.600925	0.450234	0.607784	1.48153	0.434432	0.26424	0.381101	0.140992	0.657368	3.76537	0.608243
23	4	0	0	0.0430113	0.0614578	0.127051	0.241915	0.0148109	2.30882	0.0086542	0.0635003	0.402671	0.0612236	0.00374832	0.759202	0.0263757	0.0382903	0.182232	0.433716	0.0166083	6.54521	0.00959766	0.0363944	0.282411	0.0382931	0.00146636	0.996182	0.0238589	0.0331994	0.0703316	0.487437	0.0158398	8.91625	0.00941549	0.0350086	0.217642	0.032496	0.00105599	1.0952	0.0152808	0.0199034	0.0781578	0.428694	0.00850364	12.0061	0.00472405	0.0222286	0.128259	0.0198361
23	1	0	0	0.211613	0.274549	1.28787	0.734969	0.201972	1.44281	0.108956	0.338115	1.75853	0.274803	0.0755165	0.84306	0.19095	0.26323	0.600053	0.576482	0.151876	1.19491	0.082936	0.269824	1.75825	0.263453	0.0694075	0.839884	0.26016	0.35177	0.842262	0.692653	0.243884	1.06824	0.132435	0.345681	2.06902	0.352101	0.123975	0.911551	0.0622124	0.0892039	0.406884	0.858686	0.0766473	5.52685	0.0440355	0.0868542	0.769253	0.0892612
23	2	0	0	0.378492	0.448145	1.27226	0.458248	0.205588	0.554038	0.111515	0.736544	2.19032	0.44864	0.201278	0.816883	0.655084	0.764843	1.19043	0.25113	0.192289	0.178419	0.104604	1.42137	2.83484	0.765693	0.586285	0.627121	0.15672	0.21527	0.735839	0.864055	0.186176	2.3308	0.10821	0.230967	1.76229	0.215468	0.0464263	0.975157	0.511224	0.601047	1.27955	0.276251	0.166159	0.246588	0.0892102	0.976881	2.34965	0.60148
23	3	0	0	0.858456	0.973184	2.306	0.377537	0.368427	0.199381	0.189876	1.67179	3.86619	0.975872	0.952326	0.476869	1.00864	1.16899	1.98295	0.229434	0.269158	0.102759	0.141423	2.16784	4.30582	1.17314	1.37626	0.480927	1.16466	1.44291	2.70855	0.225541	0.326596	0.0799342	0.16761	2.21295	5.18846	1.44805	2.09685	0.407941	0.406923	0.511232	1.1053	0.402962	0.206445	0.422588	0.110917	0.713766	2.37774	0.51232
23	4	0	0	0.0322193	0.0479645	0.319973	0.245096	0.0113207	3.03852	0.00648244	0.050497	0.431268	0.0461889	0.00213342	0.608613	0.0163664	0.0225671	0.0929106	0.471551	0.0106438	12.2131	0.00622244	0.0222963	0.169822	0.0225719	0.00050949	0.99982	0.0132289	0.0192344	0.0417956	0.472167	0.00886517	15.1354	0.00533551	0.0189629	0.141066	0.0187755	0.000352519	1.00946	0.0119327	0.0241433	0.270305	0.302126	0.00729877	6.96314	0.00406376	0.013079	0.325012	0.024158
24	1	0	0	0.242074	0.31515	1.15965	0.683463	0.215593	1.17891	0.117306	0.360771	1.52202	0.315442	0.0995036	0.801897	0.106429	0.130553	0.275364	0.524719	0.0685239	2.26884	0.0386931	0.180099	0.654196	0.130591	0.0170541	0.976335	0.286073	0.428127	1.06912	0.578827	0.248051	0.742719	0.136398	0.300692	2.52894	0.428541	0.183647	0.808717	0.0369926	0.0470912	0.155962	0.783618	0.0368593	9.67674	0.0214099	0.0586018	0.269218	0.0470373
24	2	0	0	0.357473	0.410962	0.632066	0.268173	0.11029	0.331796	0.0561195	0.725666	1.40559	0.411265	0.169139	0.485508	0.354949	0.416376	0.79969	0.184839	0.0767779	0.239779	0.041371	0.713858	1.5639	0.415377	0.172538	0.550905	0.132695	0.160008	0.433787	0.441178	0.0706723	1.52169	0.0390479	0.245832	0.798711	0.16019	0.0256609	0.859708	0.691945	0.777788	1.24762	0.135849	0.105366	0.0898306	0.054039	1.56066	2.44722	0.775607
24	3	0	0	0.664537	0.849511	2.60201	0.377473	0.320921	0.235347	0.170111	1.09653	4.24182	0.850182	0.72281	0.715027	1.02311	1.34016	3.81975	0.235151	0.31538	0.0929574	0.167208	1.67575	7.78151	1.34118	1.79876	0.563556	0.220797	0.304058	0.955438	0.290364	0.08837	0.520637	0.0482237	0.325324	2.07544	0.304343	0.0926244	0.63279	0.327055	0.438843	1.46893	0.240346	0.105574	0.289834	0.055923	0.524421	2.87562	0.439259
24	4	0	0	0.0201443	0.0278235	0.0643519	0.315596	0.00865456	6.86444	0.00516218	0.0343145	0.195398	0.0274229	0.000752017	0.815127	0.0178913	0.0280302	0.111205	0.40595	0.0112903	9.13862	0.00706879	0.0208244	0.157699	0.027812	0.000773507	0.943758	0.00682677	0.0086768	0.023338	1.02524	0.00868768	73.0941	0.00524851	0.0110802	0.0573413	0.00847377	7.18048e-05	1.02982	0.00882262	0.0119601	0.0380113	0.47269	0.00537942	24.5414	0.00317846	0.015704	0.0622388	0.0113804
24	1	0	0	0.18409	0.23964	0.92898	0.617747	0.148175	1.38408	0.0796328	0.247756	1.26198	0.239864	0.0575348	0.718067	0.0902243	0.126778	0.397482	0.567454	0.0720019	2.50006	0.040251	0.119409	0.767004	0.126886	0.0161001	0.875642	0.202901	0.306197	0.81195	0.58442	0.179121	1.04587	0.0982471	0.219709	2.00684	0.306493	0.0939377	0.779148	0.0329779	0.0439585	0.133158	0.697388	0.0306821	9.26217	0.0179281	0.0524277	0.288943	0.0439958
24	2	0	0	0.339325	0.405205	0.788791	0.266866	0.1082	0.339383	0.0557904	0.630841	1.54755	0.405448	0.164388	0.545881	0.307872	0.37715	1.03604	0.211408	0.0797889	0.303349	0.04321	0.527544	1.88739	0.377417	0.142443	0.610801	0.186404	0.232708	0.562156	0.297176	0.069201	0.693583	0.0376094	0.338206	1.24061	0.232862	0.0542248	0.716738	0.661628	0.7508	1.16649	0.135268	0.10166	0.092337	0.052154	1.40575	2.47592	0.751546
24	3	0	0	0.418533	0.514564	2.65256	0.31953	0.164584	0.333267	0.0884184	0.80617	3.41408	0.515081	0.265308	0.68806	0.610069	0.783554	3.31015	0.207918	0.162688	0.142989	0.0875443	1.18591	5.08058	0.782462	0.612247	0.545001	0.110847	0.156162	0.362021	0.322988	0.0503491	1.18366	0.0287633	0.165911	1.24431	0.155885	0.0243002	0.830072	0.194865	0.245912	0.892229	0.219739	0.0540736	0.484664	0.0293493	0.373389	1.55409	0.246081
24	4	0	0	0.0227894	0.0318451	0.0447123	0.339757	0.0108194	6.17037	0.00625725	0.0334644	0.170692	0.0318446	0.00101408	0.885935	0.0217791	0.0331196	0.135325	0.323586	0.0106396	5.97579	0.00646053	0.0248354	0.193493	0.0328803	0.00108112	0.900418	0.00750614	0.00972094	0.0244717	1.11836	0.0108231	67.6647	0.00633726	0.0117648	0.0634248	0.00967764	9.36568e-05	1.00752	0.00998463	0.0136918	0.0338256	0.402132	0.00542253	16.915	0.00307568	0.0160855	0.0862245	0.0134845
24	1	0	0	0.147765	0.195591	0.806206	0.517361	0.100958	1.45456	0.0553892	0.168369	1.17882	0.19514	0.0380797	0.693134	0.0714032	0.0927501	0.211931	0.505369	0.0468581	3.1266	0.0268797	0.110476	0.513321	0.0927205	0.00859709	0.944256	0.158514	0.244412	0.553421	0.484738	0.118616	1.10157	0.0659603	0.160819	1.70205	0.2447	0.0598783	0.742912	0.036754	0.0501628	0.189726	0.500259	0.0245261	5.86175	0.0140895	0.052295	0.318976	0.0490269
24	2	0	0	0.33683	0.401398	1.07267	0.249872	0.100395	0.321394	0.0518834	0.602726	1.8305	0.401786	0.161432	0.572845	0.32439	0.399441	1.41702	0.233061	0.0927234	0.321659	0.0509137	0.594095	2.13652	0.39785	0.158284	0.635233	0.122958	0.150045	0.30863	0.491872	0.0738672	1.83766	0.0414443	0.213253	0.763379	0.150176	0.0225527	0.917148	0.59237	0.687083	1.22277	0.13851	0.095069	0.105571	0.0497348	1.25598	2.55439	0.68637
24	3	0	0	0.464024	0.544153	1.60344	0.327406	0.178306	0.325144	0.0964343	0.934184	2.41203	0.5446	0.296589	0.748842	0.654577	0.840706	2.24636	0.214143	0.1799	0.13868	0.0978743	1.15224	4.43532	0.840093	0.705757	0.603775	0.0986346	0.134207	0.419938	0.374535	0.0502644	1.60471	0.0289023	0.126966	0.761792	0.134205	0.0180109	0.892355	0.171081	0.224761	0.639282	0.233357	0.0524822	0.570894	0.028876	0.288604	1.28575	0.224901
24	4	0	0	0.0252861	0.0364624	0.0464577	0.264808	0.00958777	4.31746	0.00565978	0.0350883	0.181595	0.0362064	0.00131091	0.761572	0.0266928	0.040814	0.137107	0.249538	0.0100356	3.84313	0.00621585	0.0292936	0.204555	0.0402168	0.00161739	0.743524	0.00704457	0.0091946	0.024478	1.08813	0.00980493	71.9452	0.00584156	0.0114379	0.0616098	0.0090108	8.11945e-05	0.969681	0.0103885	0.0141007	0.0330516	0.43406	0.00598813	17.9853	0.00342297	0.0170776	0.0978605	0.0137957
24	1	0	0	0.133877	0.189024	0.862823	0.50488	0.0955378	1.43786	0.0514861	0.160959	1.19404	0.189229	0.0358076	0.667971	0.0636075	0.0876931	0.194556	0.597655	0.052447	3.89801	0.0300181	0.0892581	0.56184	0.0877546	0.00770086	0.999378	0.159867	0.244949	0.509102	0.47391	0.116149	1.0639	0.063906	0.173585	1.66798	0.245087	0.0600678	0.759242	0.0377038	0.0465565	0.133456	0.484845	0.0225466	5.92987	0.0128234	0.0673706	0.245719	0.0465027
24	2	0	0	0.356045	0.418988	1.31612	0.234741	0.0983005	0.285478	0.0500616	0.666442	2.06949	0.418761	0.175361	0.517771	0.311419	0.396306	1.59846	0.217058	0.0858063	0.300144	0.0469047	0.546807	2.26953	0.395315	0.156274	0.59796	0.144084	0.184945	0.472151	0.329076	0.0608193	0.976513	0.0333556	0.228698	1.03002	0.184818	0.0341579	0.731045	0.58688	0.684671	1.15644	0.124556	0.0851867	0.0938923	0.0439181	1.29199	2.39918	0.683923
24	3	0	0	0.527564	0.622254	1.79606	0.358539	0.223305	0.299503	0.116179	1.05338	2.69989	0.62282	0.387905	0.690707	0.820316	1.003	2.31846	0.215964	0.216739	0.111929	0.112734	1.61594	4.69501	1.00359	1.00719	0.564578	0.120712	0.160198	0.499493	0.347364	0.0556526	1.20157	0.0308427	0.196594	1.02792	0.160214	0.0256686	0.805197	0.326877	0.405074	0.990549	0.216845	0.087897	0.278504	0.0457594	0.605753	2.05823	0.405345
24	4	0	0	0.0151645	0.0238494	0.0472148	0.371506	0.00886527	8.97126	0.00510864	0.0195507	0.169505	0.023863	0.000569445	0.930332	0.0120161	0.0177498	0.0929838	0.702789	0.0124618	24.2242	0.00761666	0.0155045	0.155949	0.017732	0.000314423	1.11267	0.0068328	0.00914988	0.0345103	0.978523	0.00895749	61.7133	0.00517142	0.0104487	0.0592184	0.0091541	8.37975e-05	1.03488	0.00710379	0.0116262	0.0227182	0.426099	0.00495832	21.016	0.00284576	0.00806717	0.0835331	0.0116366
24	1	0	0	0.1487	0.208214	0.892193	0.538011	0.112146	1.41549	0.0615024	0.192032	1.14486	0.208446	0.0434496	0.685429	0.0715992	0.0983833	0.253683	0.562861	0.0554108	3.28146	0.0318019	0.102505	0.598611	0.0984449	0.0096914	0.943128	0.164937	0.259705	0.575051	0.546571	0.142064	1.1603	0.0783872	0.182577	1.62719	0.259919	0.0675579	0.797548	0.0369324	0.0500046	0.19921	0.596519	0.029862	6.75734	0.0169342	0.053529	0.329541	0.0500605
24	2	0	0	0.376318	0.433405	0.896807	0.262149	0.113687	0.310811	0.0584547	0.727393	1.68561	0.433672	0.188071	0.510701	0.327509	0.402084	1.13897	0.288505	0.116078	0.401918	0.0650627	0.584787	2.07933	0.402344	0.161881	0.761369	0.194243	0.249894	0.56072	0.284599	0.0711581	0.61893	0.0386922	0.292344	1.26603	0.250029	0.0625147	0.746331	0.650519	0.74922	1.24644	0.142206	0.106613	0.0981464	0.055164	1.48051	2.56276	0.749705
24	3	0	0	0.465987	0.557913	1.73154	0.32996	0.18427	0.313576	0.0977977	0.95987	2.58784	0.558461	0.311879	0.694714	0.741025	0.916715	2.40467	0.200413	0.183195	0.116479	0.0973245	1.37808	4.44328	0.914087	0.835554	0.562806	0.0973416	0.132283	0.446219	0.440567	0.0581448	1.91552	0.0333645	0.137575	0.83464	0.131977	0.017418	0.959873	0.222405	0.275118	0.621282	0.203601	0.0559593	0.397981	0.0300641	0.404846	1.30057	0.274848
24	4	0	0	0.0230406	0.0318728	0.0762615	0.353232	0.0112363	6.67968	0.00675902	0.0365493	0.203557	0.03181	0.00101188	0.972929	0.0143472	0.0206666	0.107221	0.636048	0.0131579	18.7673	0.00803153	0.0213116	0.163632	0.0206871	0.000427954	1.10835	0.00835591	0.0105882	0.0364042	1.10811	0.0117412	63.4022	0.00711815	0.0136601	0.0649919	0.0105957	0.00011227	1.04269	0.00940834	0.0130664	0.0493537	0.474608	0.0062054	21.1117	0.00360905	0.0133852	0.0998149	0.0130748
25	1	1	0	0.0568752	0.0754901	0.355372	0.848068	0.0640505	6.37603	0.0363692	0.0863329	0.509934	0.0755252	0.00570405	1.14251	0.0364306	0.0477405	0.177479	0.925501	0.0441906	10.9741	0.0250193	0.058281	0.312763	0.0477477	0.00227985	1.11893	0.085971	0.12186	0.524962	0.852518	0.10395	3.93777	0.0585459	0.115894	0.860254	0.121934	0.0148678	1.09978	0.0382742	0.0504519	0.17681	0.958265	0.0483629	10.7037	0.0272638	0.0581187	0.329672	0.0504693
25	2	1	0	0.251879	0.300729	0.83658	0.409496	0.123234	0.758471	0.0686912	0.479865	1.32954	0.300941	0.0905654	0.901788	0.192	0.259894	0.633354	0.699393	0.181745	1.50593	0.101692	0.276212	1.5541	0.259861	0.0675278	0.994382	0.289647	0.374324	1.12391	0.467601	0.175087	0.700085	0.0981544	0.442939	2.25018	0.374438	0.140203	0.842924	0.278003	0.348856	1.08477	0.482061	0.168296	0.774856	0.0944415	0.497334	1.97572	0.349117
25	3	1	0	0.374377	0.445674	1.16108	0.75283	0.335708	0.982573	0.195386	0.707371	1.95006	0.445928	0.198851	1.21574	0.516728	0.646299	1.74494	0.518101	0.335095	0.465699	0.19481	0.862222	3.31526	0.646775	0.418318	1.09299	0.416972	0.481515	1.13111	0.387849	0.18689	0.464393	0.107828	0.796958	2.51756	0.481862	0.232191	0.931668	0.317856	0.373166	0.848875	0.318835	0.119065	0.489136	0.068213	0.601565	1.62857	0.373438
25	4	1	0	0.0139473	0.0177718	0.0838671	1.03589	0.0183684	32.1016	0.0100934	0.0239309	0.129713	0.0177319	0.000314421	1.0624	0.0110706	0.015742	0.0959366	0.867131	0.0136524	30.6371	0.0075944	0.0166181	0.148444	0.0157443	0.000247883	0.896749	0.0167301	0.0230512	0.148678	0.974863	0.0224863	23.0253	0.0122506	0.0257123	0.238902	0.0230661	0.000532047	0.881745	0.0129308	0.0168447	0.0562835	1.07722	0.018157	35.0405	0.00995528	0.0197804	0.111047	0.0168555
25	1	1	0	0.0799809	0.114356	0.906805	0.819844	0.0938067	4.11397	0.0538601	0.117884	1.11606	0.11442	0.013092	1.10625	0.0395719	0.0575636	0.483179	0.81408	0.0468768	8.09294	0.0268341	0.0565716	0.692554	0.0575825	0.00331575	1.11718	0.117619	0.166113	1.06879	0.893295	0.148485	3.02649	0.0836212	0.176854	1.63531	0.166222	0.0276298	1.08397	0.0545132	0.0720663	0.282781	0.954478	0.068835	7.42241	0.038604	0.0793958	0.635657	0.072118
25	2	1	0	0.249222	0.309185	1.13019	0.479296	0.148275	0.871676	0.0834225	0.420966	1.68917	0.30936	0.0957035	0.954463	0.234889	0.309246	0.880912	0.791527	0.244912	1.4528	0.139089	0.342529	1.99995	0.309417	0.0957389	1.04437	0.319441	0.404779	1.43265	0.482393	0.195368	0.674619	0.110654	0.521153	2.73292	0.404999	0.164024	0.917195	0.325844	0.389206	1.11361	0.454521	0.177008	0.661907	0.100386	0.623285	1.88827	0.389438
25	3	1	0	0.316877	0.388067	1.33933	0.848849	0.329603	1.26918	0.191358	0.571393	2.01196	0.388294	0.150772	1.3154	0.509536	0.627617	1.76553	0.623313	0.391413	0.569849	0.224708	0.903504	3.53442	0.627957	0.39433	1.23492	0.278634	0.323758	0.745572	0.454245	0.147139	0.79987	0.0839253	0.556515	1.5449	0.323919	0.104924	1.0427	0.249051	0.289011	0.677961	0.34545	0.0998951	0.674704	0.0564197	0.484681	1.35427	0.289174
25	4	1	0	0.0189839	0.0231953	0.0771069	1.01885	0.0235629	23.8826	0.0127737	0.0331722	0.124851	0.0231269	0.000534852	0.970013	0.00854752	0.0114341	0.0367566	0.96621	0.0110471	46.7417	0.00611019	0.0131525	0.083662	0.0114334	0.000130723	0.980734	0.0213697	0.0262712	0.0705116	1.05128	0.0276169	21.752	0.0150112	0.0379847	0.146904	0.0262699	0.000690106	0.856957	0.0117976	0.0150946	0.0501362	1.05808	0.0159798	37.9385	0.00865335	0.0201297	0.127174	0.0151026
25	1	1	0	0.0890374	0.124117	0.649281	0.890317	0.110645	4.149	0.0640791	0.12699	0.856038	0.124276	0.0154445	0.96656	0.0449246	0.0631171	0.273528	0.901345	0.0569523	8.20859	0.0327725	0.0630345	0.467242	0.0631859	0.00399246	0.878384	0.132429	0.189863	0.926779	0.77995	0.148229	2.32014	0.0838003	0.176532	1.39218	0.190049	0.0361186	0.974707	0.0444668	0.0596811	0.18771	0.901265	0.0538543	8.5144	0.0304011	0.0661405	0.376922	0.059754
25	2	1	0	0.208166	0.254909	0.755571	0.481627	0.122823	1.05877	0.0688557	0.362173	1.28121	0.255018	0.0650339	1.0651	0.225413	0.290945	0.981691	0.757767	0.220574	1.47146	0.124677	0.352361	1.91428	0.291084	0.0847301	1.09184	0.295317	0.361432	1.11327	0.531995	0.192363	0.8308	0.108623	0.509625	2.19413	0.361587	0.130745	1.0479	0.302394	0.361013	0.964044	0.476897	0.172252	0.745729	0.0972883	0.552288	1.7192	0.361194
25	3	1	0	0.27023	0.332972	1.12343	0.99105	0.330186	1.7594	0.195294	0.473457	1.76876	0.333168	0.111001	1.34005	0.361046	0.447454	1.20147	0.690118	0.308814	0.898939	0.180002	0.61493	2.6841	0.44748	0.200238	1.19626	0.416923	0.479863	1.20289	0.519582	0.24937	0.62621	0.144244	0.806365	2.2903	0.479942	0.230345	1.04675	0.175835	0.21343	0.525369	0.639542	0.136525	1.74614	0.0795729	0.316853	1.16486	0.213473
25	4	1	0	0.0155979	0.0191902	0.0618752	1.06063	0.0203038	30.4721	0.0111668	0.0272629	0.108712	0.0191432	0.000366462	0.987825	0.00891644	0.0112714	0.0301783	1.0369	0.0116827	50.7991	0.0064487	0.0144236	0.0646028	0.011267	0.000126945	1.09087	0.0172049	0.0212033	0.0588504	1.07148	0.022672	27.7027	0.0124031	0.0301796	0.123062	0.0211594	0.000447722	1.00772	0.0103419	0.0127998	0.0357495	1.08484	0.0138905	45.9203	0.0075285	0.0175808	0.0736237	0.0128042
25	1	1	0	0.0681037	0.0869253	0.412173	0.802743	0.0698094	5.39157	0.0407747	0.11427	0.602896	0.0869636	0.00756267	1.18873	0.0390191	0.0509089	0.194426	0.934912	0.0474988	10.4928	0.0270842	0.0635947	0.512868	0.0508056	0.00258121	1.09975	0.0984383	0.131464	0.591501	0.920953	0.12113	3.86269	0.066822	0.15314	1.04943	0.131527	0.0172993	1.04373	0.0617984	0.083374	0.336909	0.861233	0.0716488	5.7637	0.0398912	0.0867651	0.643839	0.0831932
25	2	1	0	0.204282	0.25815	0.916043	0.46021	0.118873	0.994635	0.0663615	0.339717	1.39391	0.258301	0.0667195	0.955201	0.25038	0.318386	0.801282	0.66138	0.210684	1.17042	0.11877	0.41384	1.98888	0.318553	0.101476	1.03172	0.261851	0.322485	0.975404	0.535141	0.172656	0.931632	0.096978	0.453886	2.06417	0.322637	0.104095	0.995083	0.2881	0.347406	1.22607	0.537142	0.186679	0.868337	0.104882	0.511062	1.86873	0.347541
25	3	1	0	0.235558	0.296679	1.16715	0.970838	0.288154	1.87818	0.16546	0.389953	1.75299	0.29681	0.0880962	1.21933	0.312203	0.393934	0.889797	0.764067	0.300956	1.09853	0.170434	0.493015	2.26366	0.393887	0.155147	1.13396	0.327703	0.383071	0.847052	0.561562	0.215089	0.84232	0.123571	0.605208	1.90665	0.383018	0.146703	1.04213	0.125366	0.15625	0.342452	0.757109	0.118284	2.79015	0.0681026	0.195229	0.80016	0.156231
25	4	1	0	0.0138338	0.0184475	0.0946235	0.958009	0.017624	28.7377	0.00972576	0.0211407	0.144967	0.0183965	0.000338433	0.972172	0.00666892	0.00897305	0.0237208	0.953856	0.00853837	60.0081	0.00480833	0.010383	0.0639571	0.00895143	8.01281e-05	1.04173	0.0151574	0.020593	0.0676562	0.966058	0.0198668	25.9978	0.0109947	0.0223448	0.163566	0.0205648	0.000422911	0.866039	0.00875305	0.0113982	0.0347413	1.09485	0.0124854	52.8916	0.00687832	0.013717	0.0848834	0.0114038
25	1	1	0	0.0808794	0.105195	0.42613	0.88497	0.0931436	4.86652	0.0539097	0.13075	0.608714	0.105251	0.0110777	1.19013	0.0419891	0.0581853	0.268539	0.954351	0.0555592	9.26964	0.0314166	0.0595084	0.461995	0.0582168	0.00338919	1.10583	0.113566	0.150988	0.656978	0.948483	0.143294	3.5323	0.0806216	0.179846	1.10733	0.151077	0.0228241	1.15767	0.0716673	0.096299	0.32088	0.842065	0.0811364	4.79697	0.0445357	0.106994	0.685897	0.0963542
25	2	1	0	0.193299	0.236957	0.702439	0.476524	0.112941	1.126	0.063252	0.326819	1.19929	0.237011	0.0561741	1.03707	0.261523	0.317664	0.692671	0.587499	0.186657	1.04271	0.105254	0.473041	1.63453	0.317715	0.100943	0.998898	0.257541	0.311248	0.729765	0.566899	0.176493	1.03072	0.0999046	0.456679	1.69568	0.311331	0.0969268	1.00129	0.282731	0.337335	0.90067	0.526306	0.17758	0.8851	0.100764	0.538178	1.64194	0.337409
25	3	1	0	0.263076	0.324634	1.16717	1.01862	0.330834	1.82013	0.191997	0.459599	1.86657	0.324785	0.105485	1.31897	0.372089	0.463778	1.44958	0.714971	0.331743	0.883846	0.190284	0.645289	2.90145	0.463994	0.215291	1.20882	0.339141	0.405196	1.17311	0.577521	0.234117	0.808681	0.132895	0.643825	2.29521	0.405383	0.164335	1.12059	0.165035	0.198869	0.525113	0.691578	0.137597	1.99522	0.0789821	0.30214	1.13249	0.198961
25	4	1	0	0.0179893	0.0225928	0.088735	0.962075	0.021635	23.2679	0.0117667	0.0295993	0.144601	0.0224878	0.000505703	1.03264	0.00981293	0.0126424	0.044846	0.993956	0.0125745	43.4154	0.00694852	0.0157459	0.0834905	0.012651	0.000160048	1.04461	0.0204357	0.0263938	0.0824854	0.991048	0.0261703	20.1904	0.014079	0.0309786	0.16733	0.0264067	0.000697312	0.815322	0.0143157	0.018178	0.0565326	1.04981	0.0190959	31.6541	0.0104735	0.0242418	0.102289	0.0181899
26	1	1	0	0.0930945	0.126578	0.608319	0.732992	0.0928599	3.39317	0.0544583	0.135104	0.841356	0.126686	0.0160494	1.06985	0.0854791	0.119933	0.605377	0.890812	0.10693	4.09544	0.0590098	0.113762	0.984438	0.120036	0.0144087	0.903304	0.141798	0.199021	0.940721	0.950169	0.189257	2.62396	0.104102	0.205171	1.50885	0.199182	0.0396736	0.838377	0.0462582	0.0638792	0.236912	0.806454	0.0515504	6.98331	0.0285342	0.0725382	0.565489	0.0639223
26	2	1	0	0.200321	0.249619	0.759199	0.463644	0.115804	1.05842	0.0660296	0.324031	1.25316	0.24977	0.0623852	0.985972	0.198032	0.253219	0.548347	0.766252	0.194154	1.75199	0.112481	0.316419	1.55298	0.253381	0.064202	1.03833	0.189698	0.256841	0.971423	1.07205	0.275504	2.42609	0.160227	0.284365	1.72714	0.256989	0.0660433	1.00957	0.377462	0.446813	1.22463	0.355755	0.15905	0.45318	0.0905806	0.676411	1.94519	0.447077
26	3	1	0	0.360306	0.458393	1.9671	0.95943	0.440128	1.23405	0.259695	0.60389	2.84307	0.458739	0.210441	1.19109	0.370774	0.461768	1.17852	1.06585	0.492514	1.30314	0.278253	0.635046	2.53676	0.462088	0.213525	1.02471	0.671304	0.862065	3.19528	1.06413	0.917934	0.689082	0.512753	1.05544	5.56428	0.862618	0.744109	0.956262	0.322548	0.429785	0.972334	0.881813	0.379188	1.14382	0.211501	0.448094	2.65998	0.43001
26	4	1	0	0.372274	0.456256	2.0295	1.3936	0.636262	1.96226	0.409026	0.690255	3.07755	0.456559	0.208446	1.16731	0.425819	0.490836	1.25741	1.14408	0.561928	1.25428	0.302582	0.835148	2.37844	0.491162	0.24124	0.837709	1.26644	1.44368	4.15812	1.1243	1.62425	0.415452	0.867081	2.5956	6.86401	1.44467	2.08708	0.643615	0.2311	0.297102	1.00442	1.2263	0.364587	2.48726	0.219852	0.358223	2.24473	0.297306
26	1	1	0	0.0785495	0.107245	0.774646	0.8124	0.0871661	4.32159	0.0497507	0.124993	0.995962	0.107295	0.0115121	1.16957	0.0670476	0.0936318	0.624059	0.862846	0.0808424	5.199	0.0456385	0.0981071	0.925004	0.0936927	0.00877832	1.11324	0.119668	0.164754	0.900108	0.909059	0.149867	3.06989	0.0834357	0.180859	1.53242	0.16486	0.0271787	1.12435	0.0366068	0.0482391	0.147449	0.776993	0.0374838	8.93387	0.0207919	0.0566065	0.318585	0.0482422
26	2	1	0	0.200117	0.25165	0.799109	0.404688	0.101881	0.921104	0.0583783	0.330044	1.29664	0.251751	0.0633786	0.937643	0.233887	0.302953	0.77634	0.664782	0.201512	1.24405	0.114309	0.340853	1.90364	0.303125	0.0918846	1.00819	0.166683	0.228203	0.884237	1.02536	0.234116	2.54804	0.132837	0.251948	1.7103	0.228327	0.0521331	1.01544	0.346487	0.402038	1.12065	0.274624	0.110472	0.380849	0.0616282	0.658094	1.8184	0.402266
26	3	1	0	0.27953	0.363985	1.4026	0.903848	0.329095	1.40852	0.18673	0.448396	2.21679	0.364104	0.132572	1.16453	0.234389	0.314041	1.26071	0.801292	0.251575	1.44549	0.142485	0.366011	2.31873	0.313962	0.0985722	1.07002	0.380986	0.524362	2.45061	0.748097	0.392404	0.802522	0.220804	0.558208	4.52542	0.524536	0.275138	0.976531	0.315264	0.407526	1.28975	0.634198	0.258564	0.865459	0.143858	0.506884	3.08094	0.407703
26	4	1	0	0.418803	0.518694	2.67773	1.08647	0.563674	1.36091	0.36631	0.744574	3.81394	0.518812	0.269166	1.2932	0.349186	0.42317	1.14833	1.14029	0.482859	1.48717	0.266669	0.61328	2.37993	0.423453	0.179313	0.920013	1.21001	1.47242	3.35979	1.104	1.6267	0.402071	0.872926	2.28221	7.48892	1.47346	2.17108	0.631856	0.361502	0.449007	1.15907	1.11205	0.499649	1.37631	0.277843	0.613152	2.49016	0.449306
26	1	1	0	0.0754825	0.100097	0.455104	0.779447	0.0780284	4.49344	0.045031	0.117403	0.643426	0.100107	0.0100215	1.1419	0.0618915	0.0821819	0.304869	0.937536	0.077097	6.40789	0.0433326	0.0967306	0.620939	0.0822337	0.00676238	1.08488	0.115777	0.160001	0.686151	0.905661	0.144997	3.1359	0.0803799	0.169029	1.26983	0.160101	0.0256322	0.989552	0.0447354	0.0635495	0.287378	0.713824	0.0453887	6.28984	0.0254304	0.0629395	0.59041	0.0635853
26	2	1	0	0.209996	0.262274	0.767597	0.463892	0.121737	1.00359	0.0691142	0.356603	1.37385	0.262425	0.0688669	1.04007	0.319626	0.376829	0.826367	0.540745	0.203891	0.813661	0.115679	0.598832	2.0202	0.377056	0.142171	0.963944	0.195446	0.273535	1.31971	1.01042	0.276538	2.13038	0.159573	0.278578	2.30834	0.273685	0.0749034	0.943441	0.450352	0.513052	1.27614	0.32806	0.168413	0.357246	0.0941484	0.887917	2.45954	0.513361
26	3	1	0	0.545139	0.681942	2.7201	0.947128	0.646271	0.850196	0.39585	0.910796	4.11048	0.682348	0.465599	1.24043	0.46431	0.584437	2.10623	1.11666	0.653038	1.08777	0.372022	0.757166	3.72305	0.584812	0.342005	1.04302	1.0666	1.32957	3.77675	1.0964	1.4587	0.450454	0.797345	1.82458	7.22897	1.33045	1.77009	0.919885	0.694873	0.849271	2.34686	1.04777	0.890432	0.675702	0.488004	1.21434	4.9711	0.849834
26	4	1	0	0.458481	0.564244	1.85638	1.30799	0.737961	1.50741	0.479829	0.809032	3.16643	0.564193	0.318314	1.14791	0.459125	0.535196	1.29751	1.16007	0.621441	1.18663	0.340524	0.915623	2.67948	0.535694	0.286968	0.859278	1.54875	1.75601	4.11939	1.14295	2.0089	0.346065	1.06911	3.14687	7.35504	1.75765	3.08934	0.646927	0.358071	0.44243	1.04579	1.14432	0.506739	1.49158	0.292494	0.63566	2.17187	0.442828
26	1	1	0	0.0770663	0.10311	0.530412	0.823251	0.0849215	4.46076	0.0474656	0.119852	0.698932	0.103154	0.0106407	1.13178	0.0671119	0.0900443	0.326031	0.887686	0.0799779	5.55698	0.0451087	0.100156	0.639439	0.0900971	0.00811748	1.10594	0.125814	0.166406	0.602171	0.881174	0.146717	2.95889	0.0820287	0.189782	1.25489	0.166502	0.0277228	1.1362	0.050571	0.06862	0.347802	0.630525	0.0432724	5.06766	0.0238684	0.077631	0.578088	0.0686291
26	2	1	0	0.201249	0.260255	0.74366	0.541101	0.140913	1.19263	0.0808814	0.303333	1.35774	0.260418	0.0678177	1.04809	0.320822	0.385361	0.806701	0.607754	0.234349	0.890835	0.132454	0.586672	2.0137	0.385598	0.148686	0.960475	0.212012	0.29008	1.42645	0.968095	0.280986	1.88046	0.158416	0.31701	2.43154	0.290246	0.084243	0.970554	0.480374	0.538729	1.21893	0.293645	0.158292	0.299951	0.0871605	1.00607	2.17075	0.539058
26	3	1	0	0.566207	0.699863	2.49184	0.908284	0.636016	0.817976	0.401082	0.985212	3.99126	0.700239	0.490334	1.31426	0.615735	0.776668	2.61048	1.15945	0.90112	0.830973	0.501933	1.06124	4.80086	0.777194	0.60403	0.943996	1.32184	1.61846	4.24764	1.15116	1.86438	0.389659	1.02207	2.31608	8.29752	1.61956	2.62299	0.830383	0.717161	0.880813	2.03196	1.12051	0.98761	0.694864	0.539812	1.26875	4.05802	0.881396
26	4	1	0	0.407975	0.500188	1.68024	1.45233	0.725791	1.90864	0.47667	0.739123	2.89956	0.499743	0.249744	1.08563	0.47431	0.548145	1.22032	1.16074	0.636798	1.15161	0.346606	0.931719	2.51866	0.548612	0.300975	0.855564	1.57249	1.76583	3.72827	1.14691	2.027	0.346687	1.0829	3.32113	6.60175	1.76736	3.12358	0.599099	0.273215	0.347397	1.016	1.15046	0.400015	1.88659	0.228079	0.428539	2.00054	0.347699
26	1	1	0	0.0965946	0.12637	0.569937	0.790329	0.0999678	3.5087	0.0561371	0.159287	0.83139	0.126489	0.0159994	1.0268	0.0838697	0.110747	0.398725	0.938664	0.104048	4.72745	0.0580861	0.137064	0.807015	0.110847	0.012287	1.01942	0.169705	0.225615	0.941861	0.924226	0.208711	2.3121	0.117908	0.273179	1.95865	0.225822	0.0509958	1.04239	0.0600087	0.0784789	0.213538	0.711381	0.0558603	4.97207	0.0306577	0.0957609	0.445009	0.0785238
26	2	1	0	0.212299	0.270793	0.965158	0.522961	0.141682	1.10679	0.0812377	0.337134	1.61548	0.270923	0.0733993	1.11584	0.364246	0.425205	0.764808	0.563881	0.23989	0.745051	0.134845	0.688549	1.96195	0.425427	0.180988	1.04198	0.196654	0.272385	1.69263	0.959509	0.261488	1.97355	0.146573	0.28766	2.72285	0.272523	0.0742685	0.984742	0.517721	0.57607	1.23808	0.24853	0.143246	0.234739	0.0779817	1.11716	2.36211	0.576372
26	3	1	0	0.473589	0.604598	2.64041	0.906622	0.548524	0.901881	0.330132	0.758599	3.80067	0.605019	0.366048	1.22411	0.579669	0.730704	2.03166	1.05492	0.771412	0.799975	0.427772	0.97004	4.27678	0.731253	0.534732	0.869598	0.978229	1.22429	4.36891	0.989554	1.21236	0.441728	0.663042	1.60831	8.02586	1.22516	1.50102	0.899778	0.498778	0.610146	1.94758	0.925396	0.565017	0.82642	0.308084	0.893079	3.73858	0.610568
26	4	1	0	0.485733	0.573298	1.81282	1.55292	0.890456	1.74702	0.574411	0.939127	3.22077	0.573407	0.328795	1.07804	0.4846	0.57815	1.51985	1.17265	0.678426	1.16121	0.388668	0.940729	2.59832	0.578542	0.334711	1.01754	1.81941	2.03756	4.40387	1.1374	2.31909	0.298818	1.24226	4.00474	7.76729	2.03893	4.15724	0.540113	0.561838	0.660601	1.42779	1.16878	0.77262	0.967019	0.422572	1.12606	2.85559	0.661048
27	1	1	0	0.166854	0.213075	0.784215	0.677311	0.144427	1.76362	0.0801904	0.281623	1.09036	0.213235	0.0454694	1.03215	0.20188	0.278625	1.03746	0.598368	0.166773	1.14251	0.0887514	0.292854	2.12402	0.278714	0.0776814	0.784109	0.155442	0.201603	0.593072	0.821588	0.165742	2.20829	0.0898699	0.249358	1.3587	0.201734	0.0406966	0.908389	0.11059	0.152594	0.506992	0.773353	0.118108	2.72444	0.0635449	0.154026	0.946011	0.152722
27	2	1	0	0.253476	0.371519	2.82213	0.593895	0.220716	0.94463	0.13047	0.350387	3.45861	0.371642	0.138118	1.07237	0.206169	0.293273	1.55562	0.792906	0.232618	1.44738	0.124574	0.28907	3.58392	0.293374	0.0860684	0.81807	0.322618	0.474003	2.21083	0.768606	0.364451	0.862984	0.194033	0.40637	4.60599	0.474172	0.224839	0.737668	0.262762	0.385062	2.7365	0.586117	0.225772	0.809011	0.120039	0.350047	3.86256	0.385199
27	3	1	0	0.657368	0.816256	2.59277	0.432987	0.353626	0.28124	0.187592	1.09513	3.66716	0.816712	0.667018	0.786524	0.711693	0.963804	3.12481	0.279777	0.269883	0.15346	0.142798	1.03794	5.86229	0.964637	0.930524	0.625343	0.537607	0.762831	2.56633	0.459734	0.350987	0.320494	0.186805	0.664629	5.27924	0.763457	0.582866	0.763487	0.237724	0.301923	0.726325	0.374084	0.112985	0.661033	0.0603013	0.363172	1.74312	0.302031
27	4	1	0	0.16738	0.210038	0.751704	1.19587	0.25124	3.63675	0.160517	0.265293	1.20289	0.210089	0.0441375	1.08152	0.115717	0.150424	0.456496	0.915567	0.137396	3.31241	0.074595	0.167853	0.859721	0.150066	0.0225198	0.805543	0.390817	0.502823	1.31717	0.987923	0.49714	1.04429	0.264443	0.592851	2.5212	0.503217	0.253228	0.490012	0.113215	0.141572	0.546374	0.935656	0.132548	3.50262	0.0702924	0.193147	0.88347	0.141663
27	1	1	0	0.223152	0.290951	1.11492	0.654057	0.190438	1.23001	0.104276	0.327479	1.49054	0.291164	0.0847764	0.933928	0.235207	0.337342	1.38888	0.564239	0.190477	0.900154	0.102583	0.298882	2.53917	0.337582	0.113961	0.821765	0.174635	0.25466	1.34315	0.716698	0.182652	1.57198	0.1021	0.239453	2.27012	0.254852	0.0649495	1.01221	0.0925748	0.126747	0.424382	0.831581	0.105478	3.56249	0.0573155	0.134431	0.924481	0.126841
27	2	1	0	0.201496	0.270268	1.388	0.589918	0.159507	1.24235	0.0908288	0.317372	1.92956	0.270389	0.0731103	1.0445	0.151096	0.197411	0.765671	0.810615	0.160084	2.22951	0.0869517	0.248393	1.65749	0.197485	0.0390003	0.972957	0.263719	0.364294	1.46398	0.748131	0.272682	1.10079	0.146239	0.385865	2.96582	0.364484	0.132849	0.865092	0.33463	0.424144	1.50738	0.47085	0.199742	0.586889	0.105616	0.544328	2.44588	0.424217
27	3	1	0	0.792534	0.97176	3.22666	0.396763	0.385905	0.214659	0.203071	1.34841	4.40346	0.972634	0.946016	0.608626	0.73171	1.0237	3.22151	0.277621	0.284302	0.143111	0.150082	1.05447	6.46599	1.02407	1.04871	0.541702	0.59551	0.891587	2.97971	0.3955	0.352822	0.233535	0.185853	0.636874	6.12214	0.89209	0.795824	0.608916	0.221839	0.319945	0.856914	0.469626	0.15038	0.800436	0.0820734	0.260846	2.28927	0.320212
27	4	1	0	0.0454804	0.0635506	0.344368	0.94499	0.0600274	8.82334	0.0356022	0.0680412	0.50029	0.0635217	0.004035	1.03331	0.0579786	0.0754923	0.236751	0.944284	0.0713581	6.68224	0.0381595	0.0889147	0.454156	0.0755684	0.00571058	0.663888	0.0714015	0.0988004	0.438873	0.853531	0.084396	4.61108	0.0450824	0.099786	0.790957	0.0988786	0.00977698	0.594468	0.033912	0.0477115	0.207944	0.845476	0.0403774	9.43621	0.0215215	0.0489155	0.427653	0.0477571
27	1	1	0	0.177571	0.239367	1.11059	0.621706	0.148938	1.42947	0.082038	0.257157	1.40978	0.239563	0.0573904	0.881246	0.204019	0.294996	1.26707	0.570508	0.16843	1.04113	0.0907446	0.266705	2.47469	0.295228	0.0871597	0.796545	0.13205	0.180361	0.715884	0.843318	0.152184	2.66052	0.0866408	0.195111	1.45215	0.180459	0.0325653	0.925883	0.0792305	0.111951	0.573558	0.746336	0.0836269	3.66004	0.0459524	0.106975	0.9885	0.11205
27	2	1	0	0.182116	0.225639	0.803547	0.67203	0.151748	1.70326	0.0868457	0.300498	1.28132	0.225805	0.0509879	1.09782	0.105667	0.134551	0.428958	0.932843	0.1256	3.78809	0.0686728	0.172113	1.03295	0.134643	0.0181286	1.03515	0.247221	0.331716	1.10067	0.863872	0.286746	1.39452	0.153646	0.363903	2.43311	0.331931	0.110178	0.766358	0.280902	0.363198	1.09953	0.412919	0.150077	0.599967	0.0792553	0.445571	2.12056	0.363455
27	3	1	0	0.590697	0.719005	2.93843	0.335705	0.241548	0.246231	0.127478	1.09714	3.85081	0.719524	0.517715	0.658471	0.710113	0.932211	2.09372	0.226208	0.210876	0.127022	0.110387	1.13612	4.80015	0.932221	0.869036	0.550115	0.406451	0.569767	1.92064	0.361338	0.205983	0.338968	0.110152	0.5351	3.76511	0.570056	0.324964	0.706406	0.232221	0.323368	0.687763	0.369625	0.119534	0.613544	0.0641658	0.327381	2.34163	0.323392
27	4	1	0	0.0911513	0.132209	0.613121	0.568265	0.0752147	2.42983	0.0425677	0.0923452	0.803666	0.132359	0.0175188	0.823232	0.0836288	0.122195	0.584852	0.614748	0.0752538	2.65758	0.0398244	0.114755	0.929495	0.122414	0.0149852	0.613792	0.0981958	0.149076	0.571293	0.648243	0.0967039	2.39062	0.0532014	0.123622	1.23277	0.149179	0.0222542	0.747887	0.0586073	0.0936847	0.320999	0.575126	0.0539635	3.32817	0.0293008	0.0699472	0.807485	0.0938289
27	1	1	0	0.207244	0.268918	1.05393	0.676732	0.182152	1.38323	0.100214	0.312414	1.40673	0.269165	0.0724495	0.879871	0.213765	0.312891	1.02317	0.597021	0.1869	1.03135	0.101076	0.247407	2.35138	0.313055	0.0980033	0.79147	0.157756	0.22332	0.895718	0.773497	0.172851	1.92714	0.0962367	0.219734	1.80815	0.223467	0.0499374	0.815961	0.0995606	0.14446	0.590953	0.779689	0.112714	2.93915	0.0614238	0.127246	1.13799	0.144563
27	2	1	0	0.191943	0.255989	1.39209	0.587646	0.150356	1.32622	0.0868218	0.30127	1.89544	0.255862	0.0654654	1.04897	0.125512	0.165069	0.48482	0.962465	0.158962	3.18001	0.0867451	0.196903	1.07586	0.165161	0.0272783	0.980357	0.267977	0.36329	1.41495	0.791368	0.287624	1.17193	0.154808	0.407053	2.65688	0.363451	0.132097	0.785929	0.339229	0.416302	1.51334	0.450033	0.187431	0.573507	0.0994789	0.610331	2.31961	0.416482
27	3	1	0	0.605801	0.733215	2.75109	0.446179	0.327365	0.32697	0.176017	1.12692	3.90869	0.733708	0.538328	0.844605	0.728889	0.928305	2.96657	0.27323	0.253828	0.157141	0.135616	1.23487	5.59114	0.928989	0.86302	0.624123	0.551399	0.761759	1.80852	0.354456	0.270175	0.249341	0.144863	0.794078	4.65504	0.762223	0.580984	0.714198	0.213913	0.282122	0.793917	0.47868	0.135106	0.9101	0.0725015	0.32605	1.78656	0.282247
27	4	1	0	0.0925553	0.130001	0.91484	0.834022	0.108505	3.87367	0.0655645	0.138924	1.14949	0.130099	0.0169257	1.11603	0.0993172	0.150193	0.690142	0.778326	0.117	2.77772	0.0627673	0.119306	1.51118	0.150322	0.0225967	0.55986	0.130184	0.178993	0.59099	0.895651	0.160432	2.69395	0.0864357	0.186634	1.37235	0.179123	0.0320851	0.61066	0.052948	0.0725907	0.232139	0.865646	0.0628722	6.49828	0.0342796	0.0761513	0.507787	0.0726304
27	1	1	0	0.159137	0.209493	1.3663	0.670946	0.140656	1.78612	0.0784967	0.252142	1.6583	0.209638	0.0439482	1.06089	0.197897	0.275224	1.46251	0.581977	0.160288	1.13201	0.0858701	0.298522	2.36881	0.27542	0.0758561	0.796708	0.145885	0.19946	0.855768	0.811458	0.16196	2.27933	0.0908011	0.213438	1.55827	0.199592	0.0398368	1.00337	0.0834203	0.10765	0.279712	0.73396	0.0790696	3.72063	0.0431809	0.139718	0.757331	0.10773
27	2	1	0	0.204216	0.266784	1.12081	0.626166	0.167124	1.33267	0.0949346	0.311069	1.6144	0.266901	0.0712364	0.99815	0.134558	0.177953	0.550265	0.890915	0.158631	2.71193	0.0859769	0.205202	1.33679	0.178054	0.0317032	0.973752	0.276825	0.391407	1.57668	0.782524	0.306496	1.06314	0.163097	0.374495	3.15246	0.391676	0.15341	0.737756	0.303236	0.370364	1.36343	0.45307	0.167916	0.644986	0.0885941	0.520493	2.03335	0.370619
27	3	1	0	0.544692	0.664627	2.34079	0.458016	0.304515	0.364863	0.161282	1.02246	3.37905	0.664857	0.442035	0.759482	0.731482	0.918053	1.96312	0.271057	0.248917	0.156499	0.131978	1.31657	4.6172	0.918321	0.843314	0.626474	0.483784	0.630656	1.69516	0.402282	0.253818	0.340901	0.13571	0.787201	3.81349	0.630945	0.398092	0.761675	0.27028	0.371905	1.03079	0.467186	0.173854	0.67071	0.0928806	0.367037	2.86102	0.37213
27	4	1	0	0.0307148	0.0468388	0.253295	0.753444	0.0352036	9.04091	0.0197372	0.0419315	0.386176	0.0467237	0.0021831	0.821149	0.0211877	0.0324319	0.169163	0.606213	0.0195499	10.2212	0.0106301	0.0277076	0.25145	0.0322492	0.00104001	0.827228	0.0476612	0.0811753	0.30671	0.707643	0.0572866	4.7688	0.0312526	0.0520089	0.94186	0.0809541	0.00655356	0.615511	0.0164267	0.0234993	0.0859083	0.611772	0.0143916	14.2711	0.00789762	0.0225009	0.213651	0.0235245
28	1	1	0	0.0704581	0.0898488	0.309114	0.739146	0.066472	4.59295	0.0371458	0.120611	0.483093	0.0899309	0.00808756	0.963353	0.0330933	0.046033	0.235567	0.756547	0.0348122	9.148	0.0193694	0.049417	0.352119	0.0460146	0.00211734	1.01903	0.104814	0.139328	0.487908	0.759719	0.105722	2.96291	0.0573781	0.15877	0.973301	0.13916	0.0193654	0.826859	0.0406627	0.0530065	0.183201	0.795975	0.0418751	8.59878	0.0237985	0.0596019	0.313939	0.0526086
28	2	1	0	0.227781	0.276898	0.903577	0.408352	0.11317	0.790293	0.0606988	0.398078	1.33878	0.277138	0.0768054	0.762875	0.166114	0.222151	0.739885	0.531804	0.118244	1.29246	0.0638959	0.262324	1.63345	0.222345	0.0494373	0.856159	0.118697	0.160244	0.637245	0.488708	0.0783994	1.70188	0.0437982	0.173567	1.1681	0.160422	0.0257352	0.843612	0.376447	0.46617	1.2914	0.224241	0.104515	0.256597	0.0557415	0.710231	2.15282	0.466083
28	3	1	0	0.742762	0.888809	3.29878	0.416383	0.370383	0.249834	0.197683	1.42025	4.58384	0.889526	0.791256	0.747347	0.834382	1.0722	2.71502	0.27423	0.294336	0.136211	0.156917	1.31067	6.33321	1.07332	1.15201	0.584451	0.794374	0.999179	2.38621	0.275437	0.275498	0.14525	0.145313	1.29407	5.1379	1.00022	1.00044	0.6019	0.229819	0.315223	0.839675	0.393842	0.12427	0.682489	0.0679496	0.322094	2.23713	0.315534
28	4	1	0	0.0128015	0.0167285	0.0660411	0.66759	0.0108015	22.071	0.00577795	0.0209368	0.102974	0.0161799	0.00026179	0.854822	0.00798748	0.0108157	0.0365423	0.594409	0.00632283	31.7317	0.00359043	0.0111184	0.0744487	0.0106372	0.00011315	0.970794	0.0127955	0.0161666	0.053674	0.726156	0.0116405	24.1328	0.00620141	0.0211719	0.0979534	0.0160303	0.000256971	0.871208	0.0070237	0.008859	0.0305574	0.680182	0.00602226	41.3568	0.00324202	0.0117267	0.0525397	0.0088539
28	1	1	0	0.0668016	0.0819419	0.256587	0.684079	0.0560812	4.64298	0.0312046	0.111877	0.404301	0.0819806	0.00672082	0.95498	0.0388972	0.0534266	0.197449	0.717349	0.038309	7.56519	0.0215755	0.0535865	0.35889	0.0534036	0.00285194	0.923926	0.0877228	0.117322	0.372425	0.674974	0.0792356	3.11966	0.0429905	0.12562	0.710254	0.11739	0.0137805	0.809536	0.0436265	0.0581573	0.191808	0.755065	0.043956	7.11098	0.0240989	0.0622074	0.384032	0.0582148
28	2	1	0	0.171635	0.21642	0.754557	0.410939	0.0890339	1.0325	0.048467	0.283636	1.13578	0.21666	0.0469414	0.858289	0.169782	0.213755	0.566236	0.454695	0.0972738	1.149	0.0525862	0.28109	1.10851	0.213932	0.0457669	0.820256	0.0973733	0.127197	0.453192	0.541508	0.0689183	2.32329	0.0376324	0.153435	0.815105	0.127271	0.0161979	0.877463	0.31946	0.390375	1.18076	0.22422	0.0875327	0.302629	0.0461213	0.574223	1.8807	0.390387
28	3	1	0	0.574556	0.724424	2.86841	0.464213	0.336722	0.340002	0.178891	0.990746	4.0916	0.725361	0.526149	0.744216	0.674211	0.878684	1.92318	0.306092	0.269336	0.187565	0.145222	1.0984	5.10814	0.879916	0.774252	0.606493	0.62813	0.796073	1.50874	0.321302	0.256145	0.212061	0.134774	1.0933	4.31194	0.797209	0.635543	0.605349	0.359821	0.459979	0.832721	0.273572	0.126012	0.317277	0.0673158	0.613448	2.91544	0.460616
28	4	1	0	0.0200314	0.0320235	0.0721067	0.270591	0.00852922	4.66816	0.00463806	0.0253517	0.213388	0.0315207	0.000993553	0.632347	0.0176247	0.0325783	0.169598	0.232887	0.00756688	4.00783	0.0042311	0.0143286	0.261478	0.0324917	0.00105571	0.538775	0.0186749	0.0297974	0.135996	0.282955	0.00835661	5.14734	0.00448961	0.0214837	0.192554	0.0295334	0.000872219	0.649302	0.00935892	0.012113	0.0415615	0.445651	0.00536669	20.015	0.00290253	0.0150548	0.0843768	0.0120423
28	1	1	0	0.0748739	0.11541	0.99093	0.577931	0.0667612	2.8423	0.0379286	0.0925087	1.26078	0.115518	0.0133443	0.828117	0.0567614	0.0950998	0.957149	0.641757	0.0610735	3.77519	0.0341904	0.0698304	1.22593	0.0951662	0.0090566	0.785895	0.0592782	0.0817232	0.374247	0.749254	0.06128	5.08967	0.0340462	0.0782662	0.671363	0.081788	0.00668927	0.893003	0.0722904	0.113781	0.460822	0.566908	0.0645527	2.78049	0.0360517	0.0893196	1.07313	0.113868
28	2	1	0	0.190228	0.244803	1.06224	0.423338	0.10365	0.964323	0.0578074	0.311523	1.51614	0.244839	0.059946	0.777996	0.186939	0.254087	0.537244	0.386033	0.0981612	0.824505	0.053312	0.266385	1.40981	0.254282	0.0646595	0.795476	0.245231	0.292647	0.739156	0.328985	0.0963325	0.622835	0.0534032	0.416763	1.63352	0.292818	0.0857422	0.737861	0.274022	0.361336	0.783946	0.274794	0.099391	0.417757	0.0546517	0.427569	2.10212	0.361693
28	3	1	0	0.762663	0.969801	4.5986	0.415472	0.403222	0.225884	0.21276	1.26076	6.10771	0.970515	0.9419	0.757972	0.365585	0.626191	2.22773	0.342924	0.214484	0.300882	0.117704	0.272029	5.22246	0.625456	0.391195	0.554672	1.08825	1.41249	3.52233	0.277765	0.392738	0.103901	0.207716	1.74046	8.80133	1.41392	1.99918	0.641535	0.15164	0.227958	0.566821	0.522496	0.119174	1.28526	0.0668632	0.174592	1.66508	0.228086
28	4	1	0	0.0131853	0.0170753	0.0623617	0.67281	0.0109935	23.8698	0.00637282	0.0212711	0.102023	0.0163396	0.000266983	1.05497	0.00970225	0.0133426	0.0619453	0.658624	0.00870485	27.8523	0.00486528	0.0152442	0.133042	0.0132167	0.000174682	0.862599	0.0112607	0.0153737	0.0829627	0.727075	0.0111424	27.0333	0.00634895	0.0167645	0.127189	0.015325	0.000234856	1.0662	0.0102919	0.0144407	0.0849033	0.624781	0.00898104	24.0322	0.00496583	0.0158825	0.160167	0.0143747
28	1	1	0	0.0872775	0.141051	0.961526	0.397493	0.0561182	1.56084	0.0311104	0.102619	1.1729	0.14118	0.0199319	0.8039	0.0712284	0.0895252	0.338242	0.609154	0.0545857	3.71766	0.0298521	0.116604	0.546106	0.0896092	0.0080298	0.902489	0.0737377	0.0980028	0.366111	0.656956	0.0644384	3.73162	0.0359017	0.116056	0.676775	0.0980863	0.00962093	0.926202	0.0852435	0.143725	0.278746	0.355799	0.0511874	1.37269	0.0284111	0.104606	1.23933	0.143866
28	2	1	0	0.300867	0.35862	0.956862	0.369992	0.132498	0.551866	0.0707726	0.541977	1.64193	0.358109	0.128242	0.784213	0.194319	0.237839	0.590841	0.4685	0.111547	1.09087	0.0618403	0.335598	1.21037	0.238094	0.0566889	0.922765	0.30926	0.381592	0.844063	0.288444	0.110175	0.407263	0.0594177	0.528144	1.94006	0.381962	0.145895	0.708712	0.582564	0.660232	1.23206	0.184704	0.122083	0.146421	0.0639677	1.30353	2.45955	0.660965
28	3	1	0	0.712069	0.837055	2.47524	0.366833	0.307369	0.227355	0.159621	1.46801	3.72828	0.8379	0.702077	0.633524	1.12734	1.38391	3.40888	0.218721	0.302081	0.0820992	0.156605	2.18562	6.31532	1.38113	1.90751	0.494906	0.318034	0.430863	1.22864	0.304506	0.130719	0.375823	0.0692579	0.41323	2.5084	0.429282	0.184283	0.597465	0.20777	0.280861	0.593751	0.398846	0.112131	0.746498	0.0590024	0.283094	1.54693	0.281139
28	4	1	0	0.030544	0.0421963	0.113023	0.23357	0.00986379	2.98137	0.00531703	0.0436631	0.268349	0.0422305	0.00178342	0.619959	0.0165444	0.0241849	0.134859	0.440639	0.0106677	10.0571	0.0058945	0.0242867	0.182072	0.0242096	0.000586103	0.811654	0.0225255	0.032834	0.128981	0.309126	0.0100088	5.15078	0.00539963	0.029898	0.227128	0.0323777	0.00104831	0.692499	0.0117487	0.0148859	0.0418476	0.403444	0.00592706	14.7988	0.00319404	0.0213067	0.085252	0.0146912
28	1	1	0	0.082156	0.101563	0.369539	0.651174	0.0661966	3.48969	0.0360631	0.132729	0.559935	0.101657	0.0103342	0.900931	0.0951795	0.129989	0.365608	0.481271	0.0625339	1.97678	0.0333741	0.126348	0.772226	0.129935	0.016883	0.766822	0.0704198	0.0992325	0.306329	0.856811	0.0851083	4.80832	0.0474425	0.0872906	0.743735	0.0993315	0.00986676	0.824026	0.039151	0.049958	0.15838	0.65382	0.032675	7.10874	0.0177545	0.0623084	0.308244	0.0499755
28	2	1	0	0.226766	0.284536	0.666948	0.329636	0.0937364	0.604102	0.0488491	0.393795	1.26164	0.284363	0.0808623	0.660491	0.14037	0.193892	0.777429	0.419341	0.0813807	1.15017	0.043318	0.196871	1.32252	0.194068	0.0376625	0.777019	0.258419	0.302457	0.644986	0.245252	0.0742271	0.443037	0.0405825	0.526664	1.35668	0.302656	0.0916007	0.687447	0.475565	0.535718	1.06576	0.161912	0.0868149	0.155777	0.0447852	0.987836	2.08137	0.536186
28	3	1	0	0.632824	0.739618	1.85465	0.442406	0.327577	0.310129	0.170031	1.22287	3.23992	0.740444	0.548258	0.669502	1.19299	1.37807	2.87872	0.239618	0.330622	0.0899255	0.1712	2.39074	5.08445	1.37978	1.9038	0.515064	0.245773	0.311975	0.894815	0.425106	0.132746	0.73531	0.0716999	0.403907	1.75148	0.312266	0.0975099	0.754003	0.42956	0.522516	1.00128	0.268787	0.140618	0.266714	0.0729984	0.820135	2.09328	0.523159
28	4	1	0	0.0139631	0.0188863	0.0671743	0.381115	0.00671464	12.0982	0.00375539	0.02389	0.0997462	0.0176184	0.000310409	0.777798	0.0123169	0.0179925	0.0697701	0.530992	0.00948994	16.2897	0.00520313	0.016186	0.135494	0.0178721	0.000319412	0.757983	0.0104685	0.0131118	0.02971	0.489187	0.00641656	20.4007	0.00350994	0.0181357	0.0653211	0.0131168	0.00017205	0.880531	0.00879975	0.0113393	0.0207272	0.547339	0.00597076	26.7595	0.00318437	0.0143958	0.0545196	0.0109087
29	1	1	0	0.199509	0.239241	0.806705	0.740087	0.177331	1.74184	0.100003	0.348672	1.10341	0.239608	0.057412	0.83106	0.0964475	0.12502	0.315553	1.07337	0.134313	5.10356	0.0799113	0.145289	0.742343	0.125132	0.015658	0.868608	0.279679	0.373653	0.795524	0.562804	0.210612	0.838623	0.117441	0.399037	1.9364	0.374219	0.14004	0.859469	0.0691917	0.0909809	0.234257	0.956124	0.0870694	6.27491	0.0520368	0.106241	0.590238	0.091065
29	2	1	0	0.193897	0.222249	0.467911	0.28104	0.062542	0.699815	0.0346569	0.362954	0.871305	0.222538	0.0495229	0.716876	0.182577	0.229087	0.455933	0.513292	0.117536	1.25821	0.0659722	0.309588	1.15208	0.228984	0.0524335	0.848097	0.131351	0.156561	0.458642	0.307177	0.0480391	1.09537	0.02679	0.226444	0.779831	0.156389	0.0244575	0.751405	0.311412	0.358638	0.621927	0.114393	0.0410229	0.172255	0.0221527	0.67333	1.27781	0.358614
29	3	1	0	0.405926	0.476519	1.06932	0.394151	0.187831	0.482	0.10946	0.722578	2.00092	0.476545	0.227095	0.848517	0.582521	0.699716	1.4819	0.265992	0.186274	0.223595	0.109655	1.02469	3.05922	0.700297	0.490415	0.737577	0.322982	0.382061	0.859979	0.268512	0.102679	0.400266	0.0585309	0.562265	1.65716	0.3824	0.14623	0.735685	0.247708	0.321311	0.602455	0.214871	0.0691129	0.391393	0.0404925	0.35895	1.54286	0.321648
29	4	1	0	0.0180367	0.022691	0.0538335	0.501888	0.0113681	12.8238	0.00657926	0.0310299	0.125075	0.0226506	0.000513051	1.06464	0.0180402	0.0250529	0.0399584	0.435498	0.0102232	10.7892	0.00594552	0.0262737	0.123868	0.0234747	0.00055106	0.9635	0.0179893	0.0222065	0.054835	0.595721	0.0130779	15.7501	0.00759059	0.0312844	0.120792	0.0219531	0.000481939	1.0265	0.0117603	0.0144054	0.0273384	0.424917	0.00609276	16.7897	0.00345195	0.0213652	0.0671377	0.0143387
29	1	1	0	0.183985	0.23278	0.966431	0.753474	0.175612	1.76677	0.0959734	0.314931	1.31243	0.233069	0.0543213	0.87209	0.104147	0.138457	0.418947	1.04527	0.144899	4.41166	0.0847765	0.15634	0.96393	0.138623	0.0192165	0.876372	0.250202	0.352016	0.962813	0.609778	0.214918	0.945162	0.117411	0.344446	2.26389	0.352453	0.124223	0.824412	0.0840023	0.114562	0.282359	0.868122	0.099577	4.3399	0.0571001	0.124761	0.814544	0.114704
29	2	1	0	0.253209	0.293676	0.710801	0.27871	0.0819358	0.500338	0.043242	0.516464	1.31385	0.293982	0.0864257	0.659062	0.278845	0.333288	1.02895	0.380517	0.12695	0.646536	0.0719629	0.526764	1.79988	0.333625	0.111305	0.868761	0.214964	0.252802	0.566016	0.258276	0.0653504	0.568426	0.0363916	0.403735	1.04987	0.253025	0.0640217	0.72226	0.450429	0.514049	0.842126	0.124642	0.0641196	0.127159	0.0336512	0.978186	1.67584	0.51443
29	3	1	0	0.506562	0.603096	1.41467	0.341806	0.206275	0.317163	0.11551	0.961418	2.46642	0.603487	0.364196	0.831076	0.84807	0.982914	1.99494	0.212275	0.209006	0.121462	0.11775	1.58945	3.83913	0.9846	0.969438	0.670004	0.514028	0.584003	1.05275	0.205873	0.1204	0.19981	0.0683395	0.996316	2.44572	0.584827	0.342022	0.6112	0.375223	0.449857	0.72654	0.185968	0.083774	0.231528	0.0469834	0.681713	1.77249	0.450475
29	4	1	0	0.0180858	0.0257444	0.165529	0.683038	0.0174827	15.4731	0.0101369	0.0269824	0.23221	0.0255955	0.000655129	1.14046	0.0203883	0.0336524	0.185774	0.601447	0.0199541	10.6142	0.011683	0.0228337	0.346906	0.0331767	0.0011007	0.957049	0.0195497	0.0265675	0.126915	0.776484	0.0206045	16.8657	0.0118758	0.0299467	0.220698	0.0265356	0.000704139	1.07223	0.0126397	0.0186674	0.0879316	0.509161	0.00946083	15.7542	0.00543931	0.0175114	0.165245	0.0185812
29	1	1	0	0.167151	0.211494	1.0765	0.752448	0.159315	1.97178	0.0883932	0.277183	1.36492	0.211729	0.0448292	0.971731	0.103227	0.144126	0.430092	0.976633	0.140909	3.95069	0.082241	0.145015	0.993798	0.144281	0.0208169	0.96847	0.203921	0.292505	0.92226	0.641183	0.187762	1.22523	0.105067	0.244625	2.15548	0.292836	0.085753	0.885344	0.0758882	0.103948	0.259597	1.02385	0.106545	5.79927	0.0628011	0.114152	0.75932	0.104063
29	2	1	0	0.263905	0.32844	1.05318	0.307218	0.101003	0.494675	0.0534678	0.493495	1.67689	0.328766	0.108087	0.678779	0.318818	0.389875	0.74722	0.382536	0.149018	0.544793	0.0826723	0.619018	2.04317	0.389551	0.15175	0.804668	0.199111	0.249015	0.575031	0.337834	0.0840853	0.764772	0.0473768	0.335524	1.37937	0.248895	0.061949	0.81224	0.513872	0.583493	1.22064	0.137998	0.080613	0.124433	0.0424622	1.05799	2.12852	0.584162
29	3	1	0	0.638943	0.721032	1.54525	0.320331	0.231215	0.260285	0.135608	1.37971	2.5434	0.721801	0.520997	0.682152	0.784768	0.954098	2.04941	0.238381	0.224309	0.151649	0.134274	1.45424	3.49037	0.940969	0.885423	0.652842	0.456841	0.547668	1.13429	0.307761	0.166644	0.334728	0.0981393	0.784884	2.37923	0.541472	0.293192	0.741697	0.322086	0.411182	0.671784	0.223617	0.0910843	0.321405	0.0533248	0.506197	1.65495	0.407323
29	4	1	0	0.0207767	0.0277832	0.0668456	0.407439	0.0113069	8.33372	0.00641799	0.03147	0.160334	0.0277511	0.000770124	0.913907	0.0187598	0.0279458	0.0942868	0.387412	0.0105646	8.13633	0.00605049	0.0217691	0.184854	0.0272697	0.000743639	0.911288	0.018634	0.0242594	0.072015	0.547828	0.0133032	12.7475	0.00751708	0.0277022	0.138999	0.0242836	0.000589692	1.01552	0.011806	0.016655	0.0629512	0.420963	0.00690948	14.535	0.00391579	0.0158396	0.126597	0.0164135
29	1	1	0	0.191601	0.236257	0.742036	0.640422	0.151493	1.50476	0.084202	0.340095	1.05083	0.236552	0.0559571	0.870824	0.0857417	0.117141	0.336763	0.906597	0.106319	4.61616	0.0634854	0.128852	0.906904	0.117273	0.0137529	1.03686	0.261679	0.360141	0.92362	0.510246	0.18397	0.786502	0.102243	0.354112	1.91525	0.360551	0.129997	0.818479	0.0559073	0.075631	0.37512	0.911831	0.0690412	7.10082	0.0407095	0.0850896	0.640895	0.0757171
29	2	1	0	0.237023	0.27533	0.489133	0.369291	0.101743	0.739789	0.0561533	0.438996	1.08136	0.275508	0.0759045	0.795685	0.286168	0.343722	0.718527	0.483165	0.166205	0.796962	0.0943053	0.504309	1.65683	0.343993	0.118331	0.934562	0.196447	0.234816	0.485429	0.32898	0.0773348	0.780347	0.0431219	0.383414	1.12271	0.235074	0.0552599	0.86317	0.470406	0.527205	0.904008	0.136863	0.0722123	0.13814	0.0384568	1.05062	1.7776	0.527626
29	3	1	0	0.438512	0.512172	1.31747	0.297354	0.152083	0.338956	0.0886655	0.832917	2.13676	0.511453	0.261584	0.554629	0.43104	0.577192	1.7516	0.274163	0.156974	0.285019	0.0934349	0.723126	2.56489	0.572556	0.32782	0.546549	0.233538	0.294902	0.765927	0.288886	0.0841486	0.567174	0.0481234	0.433712	1.26839	0.291286	0.0848475	0.619318	0.106696	0.148709	0.402476	0.420275	0.058555	1.81356	0.0352041	0.202014	0.61202	0.139326
29	4	1	0	0.0150007	0.0217764	0.116942	0.613821	0.0133596	16.038	0.00759722	0.021068	0.178941	0.0217647	0.000473701	0.957805	0.0144135	0.0211027	0.0675928	0.549936	0.0114983	15.3524	0.00671155	0.0184494	0.17532	0.0209085	0.000437165	0.963033	0.0167114	0.0232118	0.0599774	0.650546	0.0149196	16.0135	0.00842259	0.0249745	0.186475	0.022934	0.000525969	0.921854	0.00855564	0.0104829	0.0253027	0.487584	0.00505559	26.5035	0.00284936	0.015065	0.0647217	0.0103686
29	1	1	0	0.146913	0.182984	0.638162	0.784696	0.143705	2.40909	0.080797	0.248435	0.922184	0.183135	0.0335384	1.02209	0.0868146	0.125076	0.392209	0.989636	0.123873	4.51104	0.0706767	0.112168	0.911792	0.12517	0.0156675	1.01451	0.201832	0.268465	0.764192	0.611844	0.164396	1.26596	0.0913948	0.281607	1.58667	0.268689	0.0721939	0.984843	0.0709113	0.0971527	0.242767	0.91741	0.0891964	5.54689	0.0524345	0.105273	0.636215	0.0972263
29	2	1	0	0.211302	0.253197	0.536017	0.306055	0.0775341	0.650498	0.0417478	0.386115	1.07338	0.253334	0.0641782	0.721301	0.260363	0.311999	0.675238	0.374632	0.116867	0.671792	0.0653746	0.468536	1.51295	0.311952	0.0973138	0.891404	0.166117	0.196915	0.417184	0.317893	0.0624919	0.897087	0.0346673	0.313142	0.888783	0.196582	0.0386443	0.823445	0.399957	0.459343	0.813871	0.124379	0.0571292	0.141371	0.0298251	0.870881	1.60356	0.459315
29	3	1	0	0.349851	0.425836	1.3713	0.354843	0.151197	0.489897	0.0889448	0.638155	2.24215	0.426097	0.181558	0.832176	0.443124	0.51892	1.68131	0.289754	0.15042	0.327312	0.088209	0.776723	2.88955	0.519129	0.269495	0.69598	0.236417	0.283837	0.727515	0.292882	0.0831881	0.587688	0.0474117	0.414064	1.40677	0.284033	0.0806749	0.785299	0.177275	0.219504	0.716907	0.29026	0.0637584	0.777496	0.0375143	0.293103	1.34211	0.219659
29	4	1	0	0.0181235	0.0242087	0.138396	0.744066	0.0180268	17.6218	0.0103434	0.0290726	0.196985	0.0242274	0.000586965	1.06496	0.0160687	0.0232341	0.0616353	0.552993	0.0128628	13.6553	0.00738811	0.0207319	0.153881	0.0232603	0.000541043	0.904198	0.0201865	0.0270613	0.0819441	0.837394	0.0225585	17.8077	0.0129231	0.0308472	0.229248	0.0269389	0.000725704	1.02542	0.0115501	0.0149102	0.0365644	0.520551	0.00772779	19.7483	0.00435225	0.0188187	0.0783703	0.0148454
30	1	1	0	0.171484	0.226376	1.04908	0.728619	0.165059	1.81717	0.0932548	0.225283	1.4175	0.226536	0.0513188	0.923937	0.110614	0.152072	0.687598	0.819394	0.124602	3.18509	0.0736525	0.169143	1.29758	0.152066	0.0231241	1.05236	0.225792	0.309495	1.15936	0.669424	0.207407	1.21518	0.11665	0.322844	2.16054	0.309829	0.095994	0.953973	0.0723835	0.103432	0.372815	0.76947	0.0795409	4.32868	0.0462544	0.0958818	0.787049	0.103371
30	2	1	0	0.2973	0.354392	1.14911	0.254094	0.0901395	0.391774	0.0493035	0.572847	1.69385	0.354749	0.125847	0.652797	0.198722	0.272749	0.709586	0.567406	0.154914	1.17481	0.0875719	0.274223	1.81674	0.273022	0.0745411	0.884152	0.11685	0.153392	0.459792	0.597244	0.0917077	2.1783	0.05136	0.178878	0.918416	0.153551	0.0235781	0.928328	0.36991	0.469071	1.17298	0.124052	0.0582494	0.141632	0.0312276	0.614085	2.15448	0.469557
30	3	1	0	0.773122	0.926513	2.85153	0.372533	0.345518	0.214622	0.184623	1.36741	4.08898	0.927482	0.860223	0.61875	1.03888	1.3927	3.3681	0.255107	0.355601	0.0986168	0.191616	1.44206	7.20583	1.39393	1.94304	0.53997	0.165311	0.212293	0.891964	0.557841	0.118528	1.47756	0.0667064	0.277976	1.52998	0.212477	0.0451464	0.978281	0.206805	0.290336	0.627594	0.346073	0.100581	0.646044	0.0545703	0.238212	1.71705	0.290634
30	4	1	0	0.0184316	0.0251302	0.0728022	0.522959	0.0130983	12.0488	0.00755858	0.024422	0.14792	0.0250466	0.000627331	0.959825	0.0224202	0.0338629	0.203221	0.878895	0.0297127	15.5569	0.0177801	0.02948	0.309423	0.0338069	0.00114291	0.980071	0.0137972	0.0193135	0.114365	0.815732	0.0157225	24.1145	0.00895834	0.0217457	0.198779	0.0192741	0.000371492	1.04304	0.00894299	0.0114764	0.0619449	0.83188	0.00955692	41.6968	0.00550323	0.0151273	0.0945582	0.0114883
30	1	1	0	0.205682	0.293672	1.61746	0.705472	0.207411	1.34646	0.116385	0.290044	1.95926	0.294003	0.0864376	0.977453	0.109863	0.146579	0.469328	0.988479	0.14504	3.92614	0.0845287	0.17193	1.15543	0.14673	0.0215297	1.05861	0.310291	0.430338	1.04965	0.629533	0.271064	0.809235	0.150031	0.445452	2.87038	0.430579	0.185398	0.936379	0.0777301	0.103044	0.405404	0.850865	0.0877427	4.70062	0.0499868	0.118908	0.71546	0.103122
30	2	1	0	0.329701	0.387077	1.09958	0.279822	0.108397	0.391662	0.058774	0.649143	1.72769	0.38738	0.150063	0.730162	0.229312	0.310251	0.834687	0.505813	0.156756	0.925187	0.088858	0.306921	1.93748	0.309909	0.0960433	0.905258	0.146323	0.179833	0.525709	0.515627	0.0928011	1.58334	0.0512874	0.261259	0.974365	0.179977	0.0323918	1.03535	0.492536	0.601064	1.34784	0.124701	0.0748651	0.108729	0.0391892	0.90078	2.55877	0.600357
30	3	1	0	0.817855	0.961558	2.4326	0.349582	0.336558	0.192418	0.178347	1.48747	3.58984	0.962744	0.926876	0.610405	1.04067	1.40626	3.48015	0.243878	0.343371	0.0924112	0.183192	1.36684	6.89962	1.40796	1.98235	0.524443	0.230978	0.310479	0.874917	0.464794	0.144328	0.82694	0.0797359	0.334662	1.98887	0.31052	0.0964228	0.899311	0.25406	0.344872	0.761175	0.297602	0.102613	0.463725	0.0551307	0.316054	1.93475	0.3448
30	4	1	0	0.0223328	0.033889	0.101386	0.496536	0.0168299	8.37056	0.00961648	0.0304261	0.250819	0.0338946	0.00114885	0.896688	0.0295843	0.0467696	0.229381	0.798611	0.0369034	10.4119	0.0222328	0.0379621	0.305657	0.0462096	0.00213532	1.00932	0.0182574	0.0253429	0.140046	0.807296	0.0200777	18.5337	0.0114637	0.0270965	0.189136	0.0248703	0.000618533	0.994637	0.00812072	0.010936	0.0572733	0.894568	0.00979419	46.8613	0.00561726	0.0133349	0.0986048	0.0109485
30	1	1	0	0.213743	0.276744	1.05887	0.634232	0.175727	1.25164	0.0960862	0.302164	1.38007	0.277071	0.0767685	0.803168	0.10337	0.143145	0.592309	0.861096	0.123366	3.50326	0.0719046	0.141227	1.10147	0.143266	0.0205251	0.977124	0.267059	0.382068	1.06462	0.524493	0.200635	0.747606	0.109398	0.340964	2.33712	0.382532	0.146331	0.798069	0.0655375	0.0917717	0.31543	0.762486	0.069983	4.70578	0.0396418	0.0892051	0.660944	0.0917827
30	2	1	0	0.396898	0.459366	0.957036	0.314304	0.144527	0.374025	0.0790852	0.805384	1.70401	0.45983	0.211444	0.725629	0.295238	0.390414	0.943383	0.523329	0.204549	0.763755	0.11668	0.430603	2.20675	0.390861	0.152772	0.805664	0.165047	0.214587	0.594292	0.619888	0.133117	1.63389	0.0753472	0.267582	1.30122	0.214744	0.0461151	0.914934	0.596855	0.726104	1.38579	0.138547	0.100704	0.100488	0.0530905	1.14173	2.8668	0.72686
30	3	1	0	0.894225	1.07025	3.30123	0.357874	0.383328	0.176313	0.202285	1.58157	4.5793	1.07112	1.14731	0.588126	1.20623	1.60163	3.59346	0.252025	0.40368	0.0837869	0.214963	1.66193	8.07187	1.60175	2.5656	0.535049	0.218519	0.292727	0.762288	0.556036	0.162859	1.06579	0.0914298	0.344549	1.94816	0.292892	0.0857859	0.884789	0.259837	0.344151	0.717873	0.302574	0.104155	0.470202	0.0557164	0.357752	1.83479	0.344231
30	4	1	0	0.0259348	0.0350394	0.16137	0.692625	0.0240657	11.8897	0.0143539	0.0387624	0.24291	0.0347456	0.00120725	0.925222	0.0567719	0.0830756	0.233906	1.08684	0.0904014	7.56541	0.0523425	0.069123	0.590095	0.0831785	0.00691866	0.56898	0.0270084	0.0388097	0.123158	0.885354	0.0344087	12.6475	0.0191032	0.0352989	0.286275	0.0388643	0.00151044	0.765258	0.0153761	0.0207971	0.0920842	1.03255	0.0215073	28.3489	0.0122995	0.0232478	0.179022	0.0208293
30	1	1	0	0.24041	0.327658	1.39109	0.571537	0.18747	0.967773	0.104124	0.294926	1.77389	0.328011	0.107591	0.738238	0.105786	0.144409	0.462536	0.949301	0.137227	3.80394	0.0794889	0.149954	0.9255	0.144556	0.0208964	0.982011	0.295132	0.443524	1.32215	0.522348	0.231703	0.651996	0.128289	0.346211	3.02318	0.44358	0.196763	0.751869	0.0716688	0.0967001	0.347638	0.909732	0.0880245	5.35691	0.0501527	0.0998477	0.675855	0.0967587
30	2	1	0	0.404101	0.499014	1.40742	0.315381	0.157242	0.349853	0.086967	0.675489	2.19562	0.498579	0.248581	0.69715	0.312588	0.417704	0.947808	0.604291	0.251821	0.80431	0.139674	0.384511	2.33041	0.416722	0.173657	0.781823	0.182782	0.232491	0.744757	0.707655	0.164466	1.68203	0.0908541	0.293908	1.29339	0.23241	0.0540145	0.873821	0.648539	0.784462	1.68828	0.147336	0.114975	0.100442	0.0611652	1.13619	3.47636	0.780357
30	3	1	0	0.768202	0.863153	1.85467	0.382282	0.33045	0.236571	0.176769	1.5613	3.06249	0.864414	0.747211	0.706784	1.07392	1.36799	2.85014	0.252943	0.346529	0.0996256	0.186985	1.81816	5.66922	1.36999	1.87687	0.627522	0.23558	0.314391	0.634939	0.468019	0.147331	0.837831	0.0830268	0.363876	1.94515	0.314797	0.0990973	0.828399	0.219123	0.299753	0.683834	0.366714	0.110055	0.669029	0.060257	0.255802	1.84458	0.300111
30	4	1	0	0.0219702	0.0365877	0.223582	0.525829	0.0190121	8.28517	0.0108311	0.0268491	0.297724	0.0361564	0.00130729	0.959507	0.0275065	0.0437962	0.258108	0.990125	0.0433971	13.2436	0.0254418	0.0366993	0.583049	0.0438299	0.00192106	0.910185	0.0215901	0.0323923	0.148833	0.778767	0.0251419	13.4104	0.0139773	0.028393	0.259037	0.0322842	0.00104227	0.934501	0.0109027	0.0143566	0.0627443	0.857121	0.0123175	33.2981	0.00687672	0.017644	0.116924	0.0143708
30	1	1	0	0.177669	0.243883	1.16171	0.632148	0.154378	1.42607	0.0850502	0.237621	1.51653	0.244212	0.0596396	0.833978	0.0796746	0.103205	0.280546	1.1777	0.121703	6.73942	0.0719714	0.126527	0.669978	0.10334	0.0106792	0.879353	0.246527	0.348017	1.04656	0.564802	0.196813	0.897146	0.108937	0.315353	2.54198	0.348463	0.121427	0.850176	0.0582618	0.0780871	0.232859	0.928725	0.0725274	6.70529	0.0408928	0.0882576	0.490338	0.0780934
30	2	1	0	0.297622	0.349379	0.811332	0.309745	0.10825	0.484545	0.0591807	0.587448	1.51568	0.34948	0.122137	0.769261	0.204368	0.273562	0.899152	0.650922	0.178161	1.33902	0.100313	0.287304	1.78555	0.273706	0.074915	0.923985	0.121846	0.153515	0.496062	0.624619	0.0959706	2.28898	0.0540366	0.201767	0.835886	0.153647	0.0236073	1.05988	0.501589	0.606331	1.28141	0.132218	0.0802354	0.1156	0.0425703	0.927772	2.54873	0.606841
30	3	1	0	0.737336	0.866715	3.06326	0.418179	0.362738	0.264832	0.199265	1.38517	4.21065	0.867423	0.752422	0.731589	0.998168	1.32765	3.41797	0.295946	0.39333	0.122959	0.217195	1.34275	7.5272	1.32906	1.7664	0.673594	0.174052	0.233568	0.726998	0.628203	0.14688	1.50006	0.0820041	0.248161	1.45204	0.23381	0.054667	0.896467	0.160618	0.207416	0.461462	0.41211	0.0855591	1.09543	0.047216	0.24074	1.24585	0.207612
30	4	1	0	0.0199698	0.0282425	0.123778	0.565652	0.015806	11.5596	0.00902591	0.0280901	0.178764	0.027943	0.000780813	0.971629	0.0245048	0.0347503	0.126403	1.09755	0.0381596	18.7628	0.0226808	0.0347878	0.277269	0.034768	0.00120882	0.912614	0.0173078	0.0242311	0.119077	0.919181	0.0222496	21.3718	0.0125222	0.0256155	0.212224	0.0242058	0.000585923	0.989252	0.00758555	0.00986073	0.0444381	1.04556	0.0103182	59.5801	0.00580245	0.0123094	0.0753349	0.00986858
32	1	1	0	0.201093	0.245158	0.904391	0.682707	0.167564	1.49965	0.0903407	0.345164	1.21185	0.245441	0.0602412	0.833544	0.14417	0.193285	0.546057	0.737991	0.142805	2.16845	0.0811962	0.198446	1.20859	0.193505	0.0374443	0.940969	0.23921	0.326952	1.14451	0.546845	0.178942	0.894156	0.095744	0.322632	2.01538	0.327227	0.107078	0.779871	0.0909839	0.120813	0.30318	0.679867	0.082217	3.17664	0.0464563	0.13744	0.725137	0.120931
32	2	1	0	0.457844	0.515533	1.43177	0.253685	0.130887	0.264304	0.070357	0.916788	2.11133	0.515943	0.266197	0.60985	0.251519	0.341064	0.980193	0.476881	0.162767	0.786068	0.0915736	0.330713	2.03114	0.341315	0.116496	0.880865	0.187931	0.262347	0.960943	0.425733	0.111668	0.877576	0.0603767	0.258702	1.8245	0.262296	0.0687994	0.757455	0.533162	0.705983	1.88338	0.177083	0.125121	0.133339	0.0665682	0.835291	3.32541	0.706569
32	3	1	0	0.405381	0.489786	1.42435	0.376134	0.18439	0.416642	0.100127	0.748291	2.17934	0.490223	0.240319	0.722965	0.447531	0.585461	1.5896	0.310659	0.182021	0.29088	0.0998589	0.746417	3.44052	0.585918	0.343299	0.619866	0.312776	0.413479	1.6768	0.273792	0.11328	0.356133	0.0609643	0.497116	2.67784	0.413744	0.171184	0.589567	0.0866661	0.11858	0.417753	0.449392	0.0533265	2.02416	0.0285024	0.126551	0.883214	0.118664
32	4	1	0	0.0224306	0.0394226	0.397351	0.461278	0.0181815	6.50179	0.0101011	0.0286602	0.571313	0.0394156	0.00155359	0.888113	0.0254936	0.0447806	0.308349	0.491743	0.0219862	6.18615	0.0123664	0.0306738	0.600283	0.0447108	0.00199905	0.859184	0.0250592	0.0388352	0.238328	0.612777	0.0237663	8.69862	0.0130848	0.0337048	0.331582	0.0387845	0.00150424	0.91546	0.0125885	0.0223346	0.0522728	0.482922	0.0107932	11.787	0.00588771	0.0183323	0.3122	0.0223497
32	1	1	0	0.189375	0.232235	0.843673	0.716425	0.166585	1.65568	0.089517	0.335064	1.20439	0.232522	0.0540667	0.81161	0.158739	0.212263	0.683458	0.720678	0.153148	1.89798	0.0857098	0.227664	1.38562	0.212505	0.0451585	0.931411	0.237828	0.313533	0.767298	0.549788	0.172532	0.914431	0.0900532	0.333951	1.78444	0.313815	0.09848	0.745589	0.101512	0.131519	0.358298	0.700786	0.0921793	2.95789	0.0511774	0.160878	0.806603	0.131537
32	2	1	0	0.540712	0.623088	1.74221	0.260388	0.162375	0.221076	0.0859681	1.07535	2.51529	0.623588	0.388862	0.550473	0.379234	0.538341	1.39875	0.377476	0.203344	0.388289	0.112678	0.4604	3.33145	0.538695	0.290192	0.757576	0.225652	0.314514	0.959217	0.399974	0.125773	0.678114	0.0670526	0.340072	2.29192	0.314453	0.098881	0.708466	0.558653	0.737587	2.23492	0.16943	0.125086	0.119185	0.0649618	0.866118	3.73845	0.738274
32	3	1	0	0.641719	0.747288	2.22893	0.364513	0.272601	0.260986	0.145965	1.20971	3.2567	0.747852	0.559282	0.715469	0.743181	0.949031	2.15587	0.296594	0.281747	0.168727	0.152257	1.30658	5.1046	0.94994	0.902387	0.643575	0.602218	0.783208	2.29092	0.229986	0.180292	0.15559	0.0956168	0.970758	3.95463	0.783928	0.614542	0.540994	0.145937	0.204616	0.620372	0.438318	0.0896337	1.14081	0.0477063	0.211725	1.42428	0.204495
32	4	1	0	0.0150593	0.019785	0.0530529	0.788351	0.0153174	22.8035	0.00860863	0.0225498	0.118003	0.0194297	0.000377514	0.959229	0.0183389	0.0263596	0.0917191	0.643133	0.0169438	14.21	0.00986308	0.0254495	0.185028	0.0263457	0.000694093	1.02012	0.0195801	0.0257436	0.0906827	0.760354	0.019329	16.64	0.0107533	0.030597	0.163369	0.0254211	0.000646231	0.92997	0.0119377	0.0150542	0.0334617	0.715442	0.0105192	26.2285	0.00567012	0.0194061	0.0783425	0.0147031
32	1	1	0	0.160064	0.220541	1.12628	0.678133	0.149697	1.6765	0.0816962	0.23532	1.49968	0.22075	0.0487303	0.880543	0.159984	0.21946	1.07539	0.666245	0.146221	1.7016	0.0819617	0.235948	1.81976	0.219471	0.0481674	0.971244	0.1909	0.268382	0.925268	0.61536	0.165306	1.23082	0.0888199	0.266167	2.0665	0.268633	0.0721635	0.792483	0.106461	0.135494	0.472687	0.66427	0.0900561	2.71191	0.0498439	0.180256	0.964336	0.135572
32	2	1	0	0.529475	0.63483	2.05219	0.30648	0.194746	0.255556	0.103185	1.01664	2.85607	0.635427	0.403768	0.591309	0.417863	0.610138	2.00571	0.437404	0.266941	0.393102	0.14641	0.526312	4.33394	0.610285	0.372448	0.784059	0.255025	0.37827	1.28641	0.40066	0.151515	0.564466	0.080723	0.312421	2.65665	0.378164	0.143008	0.636367	0.551783	0.712263	1.84062	0.200626	0.143036	0.148819	0.0756444	0.952762	3.25714	0.71295
32	3	1	0	0.683701	0.808207	2.0559	0.394288	0.319001	0.259869	0.170103	1.36213	3.28486	0.809056	0.654572	0.680422	0.810406	1.0245	2.79537	0.310162	0.318002	0.164357	0.17277	1.47941	5.17869	1.02527	1.05119	0.641441	0.696043	0.889956	2.33549	0.251041	0.223635	0.150721	0.119609	1.23328	4.45077	0.89083	0.793578	0.556823	0.188509	0.254324	1.13042	0.411197	0.10456	0.858118	0.0554855	0.296022	1.94745	0.254282
32	4	1	0	0.0141548	0.0187194	0.0800433	0.73365	0.0134945	22.4877	0.00760824	0.0210388	0.13969	0.0183937	0.000338329	0.964957	0.0180121	0.0270172	0.0688969	0.841716	0.022304	17.9445	0.0125999	0.0235352	0.213049	0.0264982	0.000702157	0.891351	0.0172661	0.024593	0.091334	0.763671	0.0185857	17.186	0.0101793	0.0240583	0.17366	0.0243373	0.000592303	0.805993	0.00951313	0.0126923	0.042458	0.589642	0.00745287	25.449	0.00406577	0.0141006	0.0809894	0.0126397
32	1	1	0	0.239015	0.307892	1.39061	0.592097	0.182511	1.04034	0.0988481	0.366893	1.72341	0.308246	0.0950154	0.731347	0.18757	0.274215	1.2028	0.616147	0.169134	1.26646	0.0954296	0.221628	1.99333	0.274502	0.0753515	0.863339	0.217584	0.325102	0.963982	0.564606	0.183766	0.931876	0.0987178	0.222105	2.25111	0.325476	0.105935	0.776499	0.115187	0.153352	0.56364	0.548544	0.0842144	1.99981	0.0471344	0.173232	0.952267	0.153524
32	2	1	0	0.593881	0.689026	2.13592	0.290471	0.200325	0.226861	0.107901	1.14444	2.96484	0.689656	0.475626	0.592223	0.465956	0.696567	2.17236	0.380601	0.265364	0.301999	0.146808	0.503081	4.99631	0.697223	0.48612	0.666054	0.268939	0.37909	1.22838	0.392271	0.148816	0.549324	0.0790601	0.399738	2.75217	0.379371	0.143922	0.628044	0.478193	0.656735	1.61401	0.193224	0.126979	0.155073	0.066969	0.557693	3.05317	0.657157
32	3	1	0	0.635419	0.732759	2.24082	0.33399	0.244939	0.245913	0.132261	1.26914	3.20101	0.733373	0.537835	0.681703	0.660217	0.872483	2.06553	0.294456	0.257121	0.184504	0.140682	1.04284	4.62261	0.873206	0.762489	0.650314	0.546293	0.733553	2.60266	0.228377	0.167656	0.166362	0.0896572	0.858198	4.43778	0.734118	0.53893	0.555484	0.154321	0.209681	0.636553	0.390516	0.0819524	0.999523	0.0440188	0.236961	1.27762	0.209857
32	4	1	0	0.0183308	0.0257247	0.0670928	0.589825	0.0151611	13.0756	0.00863931	0.0254014	0.174594	0.0257044	0.000660719	0.944833	0.0228322	0.0366095	0.292581	0.63304	0.0229181	10.0653	0.0131923	0.0300448	0.368143	0.0362033	0.00131068	0.976466	0.0223488	0.0337809	0.226942	0.67193	0.0224713	11.1979	0.012524	0.0312445	0.29073	0.0334429	0.00111843	0.913791	0.0098391	0.0127123	0.0303992	0.757554	0.00963696	32.231	0.00521588	0.0160773	0.0788391	0.0127212
32	1	1	0	0.203314	0.26497	1.11247	0.659224	0.174829	1.34522	0.0946134	0.288675	1.44922	0.265204	0.0703331	0.842347	0.160035	0.239212	1.21973	0.705188	0.168707	1.66523	0.0953078	0.192384	2.06829	0.239236	0.0572341	0.945638	0.208811	0.300138	0.846652	0.587494	0.176422	1.05369	0.0950197	0.247102	1.85811	0.300296	0.0901778	0.784152	0.0992221	0.132391	0.510242	0.565254	0.0748966	2.38841	0.041932	0.144293	0.960824	0.132501
32	2	1	0	0.593546	0.744317	3.26819	0.275287	0.205047	0.196137	0.108816	0.959146	4.09834	0.744848	0.554799	0.529608	0.43531	0.72611	1.95517	0.378563	0.275083	0.28406	0.14999	0.408095	5.41359	0.726651	0.528022	0.59871	0.249635	0.388542	1.33325	0.397646	0.154625	0.541758	0.0819162	0.2721	3.31478	0.38885	0.151204	0.649062	0.458557	0.640854	1.6338	0.204095	0.130881	0.169601	0.069746	0.601417	3.2595	0.641276
32	3	1	0	0.608515	0.743129	2.71473	0.385616	0.286803	0.284905	0.1576	1.12273	3.67249	0.743753	0.553169	0.682259	0.699619	0.915113	2.56765	0.297525	0.2725	0.179237	0.150354	1.16557	5.37455	0.91589	0.838854	0.655283	0.530063	0.703294	2.62424	0.251109	0.176729	0.195359	0.0967657	0.888113	4.62513	0.703792	0.495323	0.574696	0.132684	0.187339	0.597251	0.440995	0.0826208	1.27463	0.0447399	0.171472	1.25194	0.187351
32	4	1	0	0.0199417	0.0294581	0.0797829	0.549215	0.0161909	10.4797	0.00910769	0.0279927	0.212013	0.0294801	0.000869078	0.97031	0.0281183	0.0452152	0.237485	0.57075	0.0255422	7.37451	0.0147692	0.0322584	0.317626	0.044752	0.00200274	0.823991	0.025421	0.0371641	0.189866	0.656581	0.0243464	9.78625	0.0134558	0.0310946	0.295779	0.0370806	0.00137497	0.806958	0.0119723	0.0152807	0.0377707	0.72924	0.0111375	25.6998	0.00599468	0.020528	0.0951782	0.0152728
33	1	1	0	0.0712461	0.100302	0.645953	0.585289	0.0587534	3.31692	0.0334241	0.0947265	0.770543	0.100383	0.0100768	0.874335	0.0517487	0.0670756	0.218118	1.08404	0.0728009	9.20662	0.0415228	0.0855667	0.496717	0.0671573	0.0045101	0.98443	0.0778542	0.115299	0.332581	0.650995	0.0751367	3.23832	0.0431389	0.0931912	0.957561	0.115418	0.0133214	0.917793	0.0705777	0.0974136	0.431437	0.676863	0.0659365	3.96818	0.0376566	0.0984505	0.75583	0.0974148
33	2	1	0	0.197641	0.241488	1.11876	0.215219	0.051979	0.485179	0.0283006	0.343269	1.45707	0.241517	0.0583303	0.510983	0.0780941	0.123058	0.398908	0.483882	0.0594838	2.20066	0.0332561	0.0898803	1.08463	0.12293	0.0151119	0.833351	0.0634844	0.0945979	0.299493	0.452896	0.042891	2.62644	0.0235561	0.071216	0.864868	0.0947039	0.00896884	0.736013	0.225791	0.301726	1.17179	0.169391	0.0510437	0.305593	0.027749	0.335914	1.72949	0.301337
33	3	1	0	0.285105	0.338084	0.870983	0.442185	0.14954	0.694079	0.0793805	0.551578	1.5563	0.338184	0.114368	0.754554	0.429374	0.504508	1.01019	0.280271	0.141576	0.29499	0.0752715	0.809378	2.0688	0.50514	0.255166	0.674581	0.376985	0.452726	0.904882	0.211845	0.0960241	0.24003	0.049316	0.711754	1.97246	0.453274	0.205458	0.495029	0.1698	0.203169	0.423751	0.246433	0.0500809	0.646807	0.026713	0.306103	0.91977	0.203224
33	4	1	0	0.0187049	0.0254934	0.168724	0.534238	0.0135622	11.7056	0.00754373	0.0308299	0.230985	0.0253862	0.000644457	0.807615	0.0189582	0.0285542	0.195095	0.793491	0.0226279	15.769	0.0128236	0.0259686	0.295392	0.028517	0.000813217	0.894219	0.0145033	0.0204727	0.117335	0.726524	0.0148947	19.3562	0.00813546	0.021796	0.187153	0.0205013	0.000420302	0.843101	0.00892547	0.0116695	0.0638108	0.760506	0.00888734	37.7197	0.00515118	0.0146893	0.0874591	0.0116861
33	1	1	0	0.0481739	0.0614845	0.217061	0.709785	0.0435938	6.50045	0.024521	0.0730352	0.357192	0.0614183	0.00377221	0.898285	0.0442204	0.0570504	0.149211	1.00785	0.0573452	10.1801	0.0329577	0.0700517	0.323456	0.0568987	0.00323746	0.973895	0.0548933	0.0731845	0.239951	0.80044	0.0586161	6.13173	0.0328821	0.0820079	0.480682	0.0732298	0.00536261	0.916385	0.0673224	0.0850334	0.238068	0.678799	0.0574434	4.48924	0.0321492	0.111727	0.466157	0.0846251
33	2	1	0	0.139335	0.172997	0.600079	0.277178	0.0479931	0.892979	0.026772	0.235034	0.871531	0.173149	0.0299805	0.735408	0.0849603	0.1123	0.286634	0.750017	0.0842483	3.802	0.0479724	0.131602	0.781052	0.112329	0.0126177	1.02233	0.0512219	0.0695778	0.218677	0.59363	0.041347	4.77348	0.0231575	0.0667412	0.520403	0.0696511	0.00485128	0.93325	0.136585	0.188909	0.576863	0.239109	0.0451834	0.692357	0.0247227	0.167504	1.22987	0.188966
33	3	1	0	0.213886	0.268277	0.932429	0.327916	0.0880335	0.669894	0.0482812	0.373273	1.35119	0.268464	0.0720728	0.749933	0.23266	0.30706	1.0486	0.280794	0.0862256	0.509897	0.0480816	0.332672	1.78907	0.307078	0.0942967	0.722502	0.17449	0.236749	0.829568	0.209005	0.0494944	0.474153	0.0265899	0.249607	1.55363	0.23681	0.0560788	0.510305	0.077527	0.109216	0.342519	0.304274	0.0332485	1.55765	0.0185987	0.103688	0.709111	0.109271
33	4	1	0	0.0209726	0.0331394	0.249393	0.566566	0.0187667	9.89169	0.0108529	0.0282314	0.327879	0.0331236	0.00109717	0.956281	0.0298109	0.0489939	0.298861	0.782363	0.0383167	8.96186	0.021496	0.0374035	0.58005	0.0489757	0.00239861	0.838608	0.0235073	0.0382857	0.269225	0.687162	0.0263364	9.94055	0.0146017	0.029832	0.431711	0.0383263	0.0014689	0.786794	0.0142187	0.0218743	0.127614	0.771625	0.0168891	20.0675	0.00961376	0.0198887	0.219494	0.0218877
33	1	1	0	0.0348368	0.0486216	0.22532	0.639062	0.0310659	7.48478	0.0176873	0.0511287	0.364602	0.0486117	0.0023631	0.934497	0.038474	0.0478044	0.147571	1.14438	0.0545655	13.6848	0.0311123	0.0668706	0.320101	0.0476812	0.0022735	0.967586	0.0382557	0.0530685	0.17963	0.80167	0.0425804	8.52518	0.0240509	0.0538818	0.443153	0.0531146	0.00282116	0.899612	0.0467077	0.0622799	0.240483	0.700888	0.0434635	6.40666	0.0246368	0.0748527	0.473009	0.0620121
33	2	1	0	0.139601	0.16946	0.599526	0.324082	0.0549521	1.06181	0.0305286	0.244408	0.86305	0.169562	0.0287513	0.799118	0.0982441	0.143692	0.388162	0.572545	0.0823124	2.26121	0.046736	0.128124	1.11378	0.143766	0.0206686	0.990891	0.0668955	0.103545	0.331094	0.51312	0.0531708	2.81387	0.0302143	0.0855596	0.885032	0.103622	0.0107376	0.913471	0.150798	0.199471	0.563307	0.250822	0.0500743	0.691407	0.027557	0.224912	1.08466	0.199641
33	3	1	0	0.24172	0.302585	1.09041	0.3718	0.112626	0.684615	0.062821	0.401951	1.47814	0.302921	0.091761	0.754583	0.225393	0.3052	0.875372	0.390424	0.119167	0.720511	0.0671247	0.290341	1.89538	0.305225	0.0931626	0.750639	0.177571	0.248494	0.672552	0.221886	0.0551311	0.479373	0.0295941	0.243392	1.4387	0.248465	0.0617351	0.536802	0.0576826	0.0838342	0.266967	0.426145	0.035653	2.89435	0.0202594	0.0776777	0.644545	0.0836639
33	4	1	0	0.028952	0.0399058	0.0899376	0.486045	0.0190399	7.07568	0.0108579	0.0420003	0.233784	0.0391732	0.00153454	0.895154	0.0318525	0.0413874	0.124988	1.0763	0.0444722	14.8883	0.0254188	0.0486061	0.246552	0.0413195	0.0017073	0.88374	0.0224015	0.0290482	0.0928422	0.794444	0.0230559	15.1017	0.0127193	0.0345271	0.184245	0.0290214	0.000842241	0.892048	0.0168219	0.0214583	0.0679644	1.03435	0.0221763	27.6302	0.0127006	0.0282432	0.137337	0.0214398
33	1	1	0	0.044465	0.0622746	0.304095	0.603181	0.0376234	5.35719	0.0208429	0.0646934	0.453984	0.062375	0.00389064	0.881883	0.0459233	0.0585332	0.132598	1.07339	0.0628013	10.297	0.0352476	0.074532	0.303323	0.0585074	0.00342311	0.758319	0.0472156	0.0645717	0.232749	0.759639	0.0490764	6.5475	0.0273279	0.0699858	0.516565	0.0646049	0.00417379	0.938729	0.0590091	0.0782253	0.309543	0.628019	0.0489819	4.47112	0.0271982	0.0961631	0.548911	0.0779942
33	2	1	0	0.174546	0.21845	0.666903	0.266925	0.0583666	0.671743	0.0321183	0.275622	0.951947	0.218663	0.0478134	0.647412	0.0991527	0.126428	0.348998	0.771543	0.0972172	3.47594	0.055187	0.156471	0.788227	0.126004	0.0158769	0.936471	0.0642298	0.0876272	0.239397	0.628636	0.0548214	4.07919	0.0310224	0.0959168	0.610892	0.0872069	0.00760504	0.932994	0.198586	0.268429	0.601167	0.195877	0.052635	0.391601	0.0282765	0.231077	1.38475	0.268714
33	3	1	0	0.258446	0.332698	1.27992	0.346562	0.11542	0.577986	0.0641084	0.447136	1.86252	0.333042	0.110917	0.701048	0.327828	0.418365	0.810091	0.287528	0.120365	0.389995	0.0683438	0.554213	2.08255	0.41862	0.175243	0.670946	0.25032	0.337459	0.721002	0.182212	0.0614556	0.288189	0.0327827	0.381749	1.7675	0.337275	0.113754	0.428357	0.0852599	0.118476	0.251844	0.363882	0.0427757	1.76904	0.0244461	0.119421	0.707312	0.117554
33	4	1	0	0.02821	0.0361082	0.106246	0.648249	0.0234065	10.2626	0.0133796	0.0471646	0.212715	0.0361072	0.00130373	0.943864	0.0469309	0.0568157	0.137887	1.25966	0.0711166	12.5321	0.0399447	0.0815423	0.280356	0.056457	0.00318739	0.663798	0.0247473	0.0318505	0.101414	0.920331	0.0293531	16.2818	0.0165624	0.0404583	0.208176	0.0318941	0.00101723	0.810196	0.0253785	0.0312299	0.0771695	1.14067	0.0355221	20.8558	0.0202257	0.0457335	0.190391	0.0311414
33	1	1	0	0.0376177	0.0502659	0.179241	0.554066	0.0275601	6.32868	0.0156586	0.0519803	0.319254	0.0497416	0.00247423	0.88689	0.0340839	0.0435932	0.124525	1.07213	0.0465478	14.0728	0.0265269	0.0549419	0.285002	0.0434163	0.00188497	0.796537	0.0326281	0.0440061	0.140816	0.78585	0.0346278	10.0072	0.0194304	0.0462832	0.295062	0.0440641	0.00194164	0.850891	0.0513128	0.0659708	0.208374	0.629125	0.0411013	5.40107	0.0230524	0.0743895	0.388349	0.0653309
33	2	1	0	0.140079	0.163649	0.440509	0.261358	0.0426032	0.914799	0.0243073	0.243991	0.687756	0.163007	0.0265712	0.706819	0.0657031	0.0939899	0.371929	0.679766	0.0639585	4.09467	0.0362491	0.0870175	0.74096	0.0940891	0.00885275	0.93263	0.0375603	0.0513658	0.137278	0.787394	0.0404775	8.5568	0.0226128	0.0526958	0.343139	0.0514069	0.00264267	0.915211	0.108189	0.153808	0.453215	0.280137	0.0430766	1.01874	0.0240882	0.145427	0.96082	0.15377
33	3	1	0	0.210374	0.264466	0.987338	0.380484	0.100674	0.787457	0.0551303	0.342412	1.40217	0.264595	0.0700105	0.766796	0.222549	0.297249	0.805622	0.371602	0.110381	0.696639	0.0614671	0.316389	1.79867	0.297042	0.0882339	0.823397	0.15972	0.2278	0.612943	0.237562	0.0540509	0.563852	0.0291889	0.200555	1.52449	0.227524	0.051767	0.541144	0.0689731	0.0968198	0.232601	0.332604	0.0319496	1.93515	0.0178563	0.0957932	0.667684	0.0960589
33	4	1	0	0.0397709	0.0494727	0.162144	0.471171	0.0230092	5.95187	0.0141938	0.0633088	0.272474	0.0488341	0.00238477	0.85129	0.0662677	0.0821869	0.253425	1.23719	0.101893	8.41032	0.0570461	0.112761	0.529352	0.0823581	0.00678286	0.516817	0.022688	0.0299464	0.131383	0.914893	0.0263496	17.2916	0.0143431	0.0349218	0.248924	0.0288007	0.000829483	0.781444	0.0239584	0.0300421	0.074531	1.1898	0.0354695	22.7447	0.0202135	0.040114	0.168606	0.0298113
34	1	1	0	0.117108	0.144778	0.572846	0.894244	0.129615	3.81261	0.0800977	0.199817	0.874938	0.144944	0.0210086	1.10352	0.222386	0.277682	0.749683	1.08077	0.300517	2.12893	0.164602	0.379661	1.43279	0.278058	0.0773165	0.691783	0.168812	0.215638	0.573156	0.997417	0.215373	2.47871	0.115573	0.274607	1.26375	0.215931	0.0466261	0.626923	0.159336	0.201614	0.501659	1.00848	0.203445	2.67327	0.108794	0.275205	1.28116	0.201735
34	2	1	0	0.278005	0.361925	1.21342	0.531517	0.192584	0.876049	0.115009	0.436671	1.86297	0.362328	0.131282	0.927151	0.406344	0.535847	1.86381	0.940708	0.504596	0.967874	0.278482	0.576723	3.25123	0.536401	0.287726	0.768543	0.205983	0.264619	0.700844	0.951568	0.251845	2.01378	0.141058	0.311196	1.61417	0.264663	0.0700463	0.87624	0.388578	0.49227	0.900183	0.736394	0.362948	0.822997	0.199924	0.637749	2.48184	0.492871
34	3	1	0	0.489477	0.680358	3.06382	0.659695	0.449394	0.535501	0.248502	0.651104	3.89812	0.681215	0.464054	0.835863	0.65302	0.924111	3.81866	0.612218	0.566395	0.374699	0.320707	0.911574	7.28467	0.925152	0.855905	0.852307	0.246907	0.302329	0.899898	0.913876	0.276596	1.62456	0.148818	0.414591	1.64965	0.302663	0.0916047	0.745489	0.422225	0.558393	1.7307	0.648755	0.362783	0.630615	0.197196	0.650108	3.54573	0.559199
34	4	1	0	0.0915855	0.113865	0.327497	1.00824	0.114552	5.30074	0.068424	0.1601	0.577038	0.113615	0.0129084	0.907468	0.130844	0.168216	0.473713	1.17831	0.198514	3.9977	0.113468	0.204145	0.975483	0.168474	0.0283833	0.831444	0.17609	0.211623	0.417747	1.03128	0.218544	2.62152	0.117728	0.333248	1.04833	0.211915	0.0449081	0.678166	0.10562	0.132131	0.336389	1.04554	0.138256	4.33518	0.0758046	0.18887	0.678932	0.132234
34	1	1	0	0.115713	0.144927	0.480949	1.05494	0.153088	4.53818	0.095568	0.202688	0.76098	0.145116	0.0210586	1.0204	0.218879	0.26552	0.662062	1.12148	0.298196	2.32464	0.164351	0.412719	1.37543	0.265894	0.0706997	0.720138	0.150634	0.194681	0.482033	1.04686	0.20397	2.92393	0.111	0.251232	1.21805	0.19484	0.0379627	0.719984	0.169906	0.210519	0.609175	1.05395	0.222187	2.72073	0.120916	0.293402	1.16808	0.210814
34	2	1	0	0.31482	0.395635	1.43581	0.548616	0.217231	0.827767	0.129782	0.534375	2.11231	0.395961	0.156785	1.02169	0.469406	0.614443	2.22093	0.929193	0.571514	0.835669	0.316137	0.684942	4.05601	0.615065	0.378305	0.760432	0.246426	0.324951	0.668918	0.790336	0.256931	1.36486	0.144244	0.362439	1.9764	0.325091	0.105684	1.02716	0.435823	0.568066	1.15778	0.755055	0.429299	0.726419	0.234828	0.68226	3.03579	0.568566
34	3	1	0	0.492852	0.653188	3.29234	0.857835	0.561301	0.73418	0.314331	0.751063	4.19742	0.654323	0.428139	0.872083	0.726624	0.960134	2.32615	0.813879	0.782188	0.489406	0.452035	1.07232	6.28573	0.961062	0.92364	0.821124	0.274912	0.338086	0.863163	0.915755	0.310238	1.45881	0.167428	0.502839	1.77737	0.338778	0.11477	0.689463	0.541616	0.676012	1.48661	0.664924	0.450038	0.52823	0.241978	0.88518	3.44912	0.676826
34	4	1	0	0.0844906	0.105421	0.373769	1.02952	0.108675	5.88368	0.0655604	0.144686	0.594112	0.105559	0.0111428	1.02527	0.0894201	0.117163	0.375961	1.15844	0.135882	5.67743	0.0781141	0.147328	0.85919	0.117298	0.0137587	0.925627	0.163497	0.19992	0.353134	0.989842	0.198106	2.6657	0.106776	0.305417	0.947463	0.200139	0.0400556	0.6783	0.117615	0.145454	0.385062	1.07256	0.156204	4.01534	0.0851645	0.20872	0.868561	0.145636
34	1	1	0	0.134854	0.165741	0.548806	0.920337	0.152647	3.45553	0.0950605	0.234849	0.902005	0.16586	0.0275097	1.0972	0.158405	0.20238	0.695698	1.05563	0.213891	2.88749	0.118545	0.25416	1.26591	0.20262	0.0410547	0.827219	0.26458	0.328821	0.870565	1.01547	0.334288	1.65896	0.179781	0.443862	1.79332	0.329196	0.10837	0.591953	0.160303	0.196869	0.556197	1.03733	0.204437	2.84175	0.110375	0.27615	1.12771	0.19708
34	2	1	0	0.353047	0.457149	1.43554	0.476428	0.217989	0.616592	0.129084	0.526562	2.16435	0.457549	0.209351	0.922029	0.502094	0.665007	2.44728	0.976634	0.650169	0.819174	0.363048	0.742107	4.06221	0.665724	0.443188	0.840595	0.257861	0.331609	0.734863	0.744832	0.246847	1.29265	0.141977	0.377621	1.86913	0.331413	0.109835	1.05342	0.473867	0.625235	1.46611	0.756971	0.473393	0.667461	0.261043	0.730311	3.61042	0.625379
34	3	1	0	0.5358	0.702565	3.54111	0.800378	0.563043	0.642299	0.317856	0.861207	4.57732	0.703472	0.494872	0.913168	0.722681	0.975371	2.80613	0.748874	0.731437	0.436506	0.416415	1.00454	6.93797	0.976716	0.953974	0.949488	0.340447	0.418689	1.18572	0.838263	0.351486	1.07273	0.188603	0.599925	2.30621	0.419303	0.175815	0.755279	0.54729	0.708917	1.76829	0.606061	0.430121	0.461994	0.232694	0.874122	4.2048	0.709699
34	4	1	0	0.0942785	0.114486	0.403938	0.970909	0.111278	5.12964	0.0673821	0.161409	0.639905	0.114612	0.0131358	1.09332	0.130406	0.167806	0.571444	1.11985	0.188098	3.88861	0.109709	0.199873	1.05931	0.167967	0.0282128	0.985978	0.171913	0.215635	0.425543	0.958209	0.206845	2.4226	0.112889	0.292794	1.02897	0.215866	0.0465983	0.80529	0.170434	0.205177	0.460429	1.11665	0.229362	2.9307	0.123646	0.312523	1.01372	0.205402
34	1	1	0	0.10776	0.132803	0.373723	0.830602	0.11025	3.73034	0.0657229	0.180822	0.776519	0.132735	0.0176185	1.07412	0.148546	0.192658	0.55556	1.06523	0.205418	3.08881	0.114864	0.241976	1.12649	0.19284	0.0371873	0.858182	0.174918	0.215452	0.596849	1.0005	0.215825	2.4943	0.116069	0.295743	1.21751	0.215717	0.0465337	0.64337	0.14239	0.177669	0.434436	1.01375	0.18026	3.0849	0.0975382	0.243144	0.948899	0.177814
34	2	1	0	0.338803	0.441093	1.7125	0.49052	0.216612	0.659815	0.128669	0.552566	2.57799	0.441597	0.195008	0.886177	0.524541	0.687195	2.42962	0.928907	0.639024	0.753138	0.356423	0.804439	4.34722	0.687932	0.47325	0.825714	0.243296	0.315414	0.684732	0.75884	0.239601	1.36196	0.135782	0.385312	1.94991	0.315747	0.0996962	1.0629	0.484659	0.626775	1.27813	0.714542	0.448371	0.629445	0.247843	0.738163	3.55519	0.627495
34	3	1	0	0.648146	0.779894	2.44467	0.762375	0.595314	0.542892	0.33103	1.20125	3.64894	0.780868	0.609754	0.957676	0.854012	1.09093	2.67258	0.676597	0.738696	0.350788	0.418135	1.37644	6.00749	1.09178	1.19199	1.02668	0.311183	0.385961	1.173	0.744029	0.287327	1.05273	0.156996	0.548508	2.25039	0.386177	0.149132	0.951209	0.726511	0.901447	1.81936	0.471425	0.425398	0.282948	0.230395	1.27285	3.99579	0.902367
34	4	1	0	0.111649	0.135971	0.385801	0.942916	0.127657	4.24852	0.0778723	0.193951	0.724317	0.135386	0.0183293	1.15578	0.121713	0.156046	0.46037	1.13115	0.176615	4.20941	0.102621	0.196793	0.891483	0.156137	0.0243788	0.97797	0.219952	0.263938	0.576291	0.974592	0.257429	1.96184	0.136878	0.395749	1.34087	0.26414	0.06977	0.723474	0.144536	0.181616	0.477814	1.04345	0.189641	3.11163	0.10278	0.250936	1.14665	0.181744
34	1	1	0	0.109288	0.139778	0.467202	0.937989	0.131231	4.08793	0.0800172	0.163649	0.73327	0.139907	0.019574	0.979726	0.166405	0.21432	0.641199	1.07562	0.230881	2.78381	0.128262	0.260185	1.25837	0.214649	0.0460744	0.817699	0.161256	0.200909	0.455963	1.02892	0.207036	2.79659	0.11323	0.275836	1.13088	0.201217	0.0404884	0.733248	0.158016	0.202086	0.621994	0.994408	0.201234	2.66916	0.109307	0.263382	1.17083	0.202366
34	2	1	0	0.348389	0.448692	1.60205	0.482896	0.216787	0.624247	0.12581	0.567873	2.34545	0.448931	0.201539	0.983538	0.529261	0.702926	2.69869	0.968113	0.68119	0.769865	0.381153	0.750749	4.24412	0.703626	0.49509	0.824882	0.236513	0.295399	0.675884	0.906597	0.268067	1.73529	0.151716	0.388598	1.70659	0.295685	0.0874298	1.0383	0.488164	0.630113	1.38911	0.749675	0.472852	0.658552	0.261996	0.747243	3.48719	0.630742
34	3	1	0	0.622027	0.792195	2.8872	0.782884	0.620756	0.544393	0.342263	1.01242	4.02589	0.792909	0.628705	0.987335	0.810439	1.07694	3.58296	0.699395	0.753915	0.361095	0.419586	1.20399	6.94476	1.07795	1.16198	1.05064	0.29635	0.368691	1.00344	0.730225	0.269459	1.06862	0.145511	0.511858	2.05258	0.369009	0.136168	0.989631	0.675089	0.849271	2.35238	0.539862	0.458921	0.339201	0.245114	1.09502	4.57447	0.850071
34	4	1	0	0.142154	0.178943	0.653261	0.998357	0.178554	3.54638	0.113436	0.244595	1.01433	0.178848	0.0319865	1.00688	0.158469	0.210935	0.567014	1.1193	0.236409	3.00356	0.133989	0.252827	1.44966	0.211211	0.0446101	0.854032	0.157568	0.206039	0.579798	1.01018	0.208395	2.66282	0.113324	0.23513	1.24481	0.206295	0.0425577	0.678067	0.289468	0.340203	0.688415	1.16568	0.397107	1.84552	0.214178	0.531886	1.55085	0.340665
35	1	1	0	0.0261485	0.0343133	0.12987	0.829748	0.028506	13.8258	0.0163181	0.0413356	0.198006	0.034355	0.00118026	0.963245	0.03156	0.0435526	0.186097	0.908827	0.0396283	12.3084	0.0234019	0.0443507	0.353093	0.0436038	0.00190129	0.992947	0.0323367	0.0443643	0.236393	0.767136	0.0340573	9.77854	0.019273	0.0482836	0.345095	0.0443953	0.00197094	1.01856	0.024054	0.0318869	0.0942378	0.550578	0.0175523	9.7201	0.00987873	0.034888	0.179759	0.0318798
35	2	1	0	0.252512	0.301915	0.742763	0.1853	0.0559944	0.314452	0.0287139	0.459128	1.23694	0.302182	0.0913141	0.516416	0.0770507	0.115968	0.697951	0.776311	0.0901237	3.82724	0.0515814	0.10398	1.25981	0.116092	0.0134774	0.966653	0.180938	0.226107	0.485862	0.129023	0.0292042	0.299336	0.0153361	0.286911	1.11804	0.226348	0.0512335	0.391767	0.385831	0.469748	0.901472	0.109652	0.0515633	0.119394	0.0264015	0.671576	1.92023	0.470243
35	3	1	0	0.187258	0.235184	0.723767	0.4466	0.105112	1.04408	0.057836	0.307053	1.12953	0.23536	0.0553944	0.766396	0.380671	0.444934	1.09412	0.244058	0.108684	0.300328	0.0595583	0.743352	2.11934	0.445321	0.198311	0.581356	0.0355972	0.0441068	0.13254	0.301255	0.0132941	3.73003	0.00726374	0.0637132	0.266367	0.044129	0.00194737	0.733309	0.138442	0.161132	0.410562	0.171921	0.0277148	0.5583	0.0145089	0.281477	0.706409	0.161207
35	4	1	0	0.00818776	0.0124427	0.0158765	0.224292	0.00275808	10.5103	0.00158928	0.0107809	0.061543	0.0122968	0.000151212	0.681762	0.00935136	0.0129419	0.0264306	0.43746	0.00566936	20.0072	0.0033603	0.0140034	0.0737857	0.0129597	0.000167954	0.942007	0.00688283	0.0107151	0.0397143	0.249496	0.00258175	13.9573	0.00149451	0.00905002	0.0498108	0.0103478	0.000107078	0.711718	0.00305507	0.00418595	0.00800062	0.527068	0.00219114	70.7257	0.00122231	0.00443782	0.0232862	0.00415722
35	1	1	0	0.0245394	0.0309922	0.115459	0.757932	0.0235149	14.1093	0.013581	0.0422739	0.175942	0.0310251	0.000962559	0.981133	0.0257412	0.0350145	0.144236	0.938105	0.0328689	15.2965	0.0187784	0.0365179	0.264255	0.0350375	0.00122763	1.01132	0.02626	0.0344893	0.14209	0.682205	0.0235504	10.9524	0.0130519	0.040709	0.244912	0.0345209	0.0011917	0.900155	0.0126455	0.0168245	0.060769	0.626835	0.0105455	20.5718	0.00582241	0.0197095	0.10981	0.0168235
35	2	1	0	0.270499	0.317451	0.83375	0.181082	0.0575409	0.29756	0.0300452	0.541634	1.31508	0.317761	0.100972	0.505296	0.0839335	0.129158	0.625624	0.771329	0.099715	3.37895	0.0564708	0.100042	1.25956	0.129277	0.0167125	0.87476	0.169693	0.211071	0.4281	0.127021	0.0268321	0.32401	0.0144583	0.294837	1.08793	0.211242	0.044623	0.388444	0.398844	0.482801	0.923711	0.107874	0.0521303	0.115861	0.0270573	0.777543	1.98873	0.483251
35	3	1	0	0.142081	0.179527	0.53638	0.363048	0.0652216	1.12531	0.0363185	0.25161	0.876454	0.17965	0.0322741	0.678084	0.25772	0.314817	0.578096	0.225552	0.0711466	0.398047	0.0396049	0.468437	1.41399	0.315433	0.0994979	0.539779	0.0149906	0.0194982	0.050916	0.368184	0.0071905	10.7224	0.00408959	0.0237709	0.0937033	0.0195296	0.000381407	0.793036	0.0803847	0.0950003	0.179299	0.149895	0.014261	0.814234	0.00737011	0.170293	0.354706	0.0951398
35	4	1	0	0.00963975	0.0190998	0.109114	0.259391	0.00491065	8.02865	0.00287748	0.00847607	0.148764	0.0189315	0.000358402	0.486675	0.0142774	0.0303864	0.163082	0.249045	0.00742657	4.91207	0.00436804	0.0123618	0.200902	0.0298202	0.000889245	0.531925	0.0054928	0.00793941	0.0233303	0.366623	0.00289352	27.1554	0.00169149	0.00730576	0.0505056	0.00789236	6.22893e-05	0.861486	0.00440372	0.00764488	0.039659	0.322203	0.0024391	23.573	0.00135088	0.00488324	0.0549745	0.00757009
35	1	1	0	0.0241556	0.0303731	0.0933645	0.638673	0.0192954	12.2679	0.0111975	0.041958	0.164332	0.0302117	0.000912746	0.948409	0.0250561	0.0352206	0.123887	0.858372	0.0302339	14.1055	0.0174996	0.0359085	0.271577	0.0352224	0.00124062	0.908493	0.0288125	0.0376384	0.115084	0.744654	0.0280666	11.1334	0.0158161	0.0444738	0.246654	0.0376907	0.00142059	0.852124	0.0175581	0.023387	0.0576271	0.499976	0.0116733	12.5309	0.00683083	0.0265716	0.144087	0.0233478
35	2	1	0	0.246937	0.290049	0.706457	0.185279	0.0537365	0.330588	0.0278084	0.446688	1.24186	0.290031	0.084118	0.561667	0.0632843	0.0886409	0.302042	0.833727	0.0739609	5.43533	0.0427742	0.0891008	0.765695	0.0887111	0.00786966	0.95399	0.168484	0.220512	0.505422	0.124912	0.0275674	0.297462	0.0144882	0.282647	1.1483	0.220695	0.0487061	0.369375	0.373101	0.459299	0.875098	0.108004	0.0496444	0.120439	0.0254467	0.679939	1.96581	0.459655
35	3	1	0	0.218748	0.326977	1.34421	0.453303	0.148376	0.768028	0.0822859	0.200315	2.12261	0.327321	0.107139	0.604358	0.38124	0.579771	1.78093	0.288834	0.167633	0.275481	0.0927924	0.384598	3.8864	0.580378	0.336838	0.587205	0.0245882	0.039852	0.158917	0.495692	0.0197731	7.06102	0.0112355	0.0238524	0.363684	0.0398899	0.00159121	0.735393	0.0930373	0.154706	0.63319	0.228314	0.0353494	0.777049	0.0186272	0.0672373	1.09017	0.154828
35	4	1	0	0.00943978	0.0139494	0.0355002	0.279712	0.00371818	12.1474	0.00214646	0.0145766	0.0809905	0.0132929	0.000176701	0.718699	0.0105362	0.0162233	0.0307196	0.395867	0.00616565	14.7279	0.00357274	0.0115508	0.0899989	0.0155751	0.000242583	0.754861	0.00959498	0.0137411	0.0437446	0.243758	0.00320976	10.7371	0.00186172	0.0139121	0.0755849	0.0131678	0.000173391	0.639287	0.00492704	0.00765082	0.0285965	0.327342	0.00250169	23.8762	0.00139453	0.00607466	0.0556987	0.00764242
35	1	1	0	0.0169137	0.0222509	0.0894223	0.6686	0.0148803	17.281	0.00855971	0.0272397	0.148827	0.0222559	0.000495324	0.982967	0.0177856	0.0260769	0.104189	0.840788	0.0219119	18.7378	0.0127264	0.0252175	0.24139	0.0260611	0.000679181	0.967724	0.0191909	0.0259528	0.098025	0.670854	0.0173727	14.5467	0.00975537	0.0277042	0.19119	0.0258964	0.000670622	0.847072	0.0123687	0.0160774	0.0592357	0.622155	0.00984433	22.3024	0.00558377	0.0186958	0.109759	0.0158229
35	2	1	0	0.212303	0.256172	0.648008	0.218777	0.0560552	0.4487	0.0294568	0.390412	1.21212	0.256221	0.0656492	0.604752	0.0755499	0.117193	0.514499	0.766134	0.0898403	3.75854	0.0516836	0.0984102	1.29202	0.117265	0.013751	0.900453	0.153643	0.193148	0.399755	0.138149	0.0267037	0.379642	0.0141847	0.261109	0.940649	0.193296	0.0373633	0.447632	0.361006	0.439547	0.918731	0.117399	0.0516419	0.138284	0.0267577	0.665364	2.0408	0.439884
35	3	1	0	0.119649	0.164174	0.876397	0.393661	0.0646391	1.31815	0.0355394	0.185097	1.19884	0.1642	0.0269616	0.823283	0.227792	0.293149	0.829981	0.237148	0.0695036	0.44425	0.0381596	0.389948	2.03331	0.293081	0.0858966	0.602095	0.0214187	0.0290331	0.115182	0.325794	0.00945351	6.33788	0.00533636	0.0319738	0.186964	0.0290169	0.000841979	0.754849	0.0861971	0.105653	0.313874	0.173876	0.0183715	0.865564	0.00966297	0.167678	0.650772	0.105659
35	4	1	0	0.00689837	0.0086316	0.0209847	0.424923	0.00361567	28.6071	0.00207124	0.0116014	0.05237	0.008509	7.24032e-05	0.938989	0.00768934	0.011221	0.0241366	0.569521	0.00635894	30.0262	0.00374326	0.0100019	0.0776642	0.0111654	0.000124667	1.00314	0.00501405	0.00636364	0.0216699	0.49246	0.0031316	44.6579	0.00180588	0.00834638	0.0342358	0.00635909	4.0438e-05	1.04565	0.00297519	0.0037134	0.0111157	0.70598	0.00262349	108.133	0.00149325	0.00540767	0.0211044	0.0037161
35	1	1	0	0.0203221	0.0253597	0.0654065	0.612667	0.0154932	13.9031	0.00889095	0.0341745	0.129814	0.0252882	0.000639493	0.986346	0.0219531	0.0300602	0.0787618	0.64031	0.0192225	12.2371	0.0110285	0.0319166	0.219103	0.0300206	0.000901239	0.976844	0.0220096	0.0281248	0.0746626	0.592314	0.016639	11.7522	0.00927405	0.0369414	0.154949	0.0280915	0.000789135	0.876066	0.0108875	0.0145143	0.057282	0.597734	0.0086488	23.7445	0.00497117	0.0172565	0.099214	0.0144693
35	2	1	0	0.251067	0.296231	0.654181	0.228694	0.0677976	0.395543	0.0347626	0.471856	1.24021	0.296455	0.0878857	0.56343	0.074677	0.105359	0.336765	0.752101	0.0792969	4.0856	0.0454167	0.108282	0.965035	0.105434	0.0111163	1.06045	0.168838	0.201301	0.387181	0.148226	0.0298525	0.389251	0.0157885	0.318024	0.871393	0.201398	0.0405612	0.454851	0.458991	0.539223	0.883423	0.120785	0.0651674	0.114017	0.03319	0.897505	1.96665	0.539533
35	3	1	0	0.142093	0.175427	0.662838	0.472251	0.0829154	1.52748	0.0470869	0.251125	1.00551	0.175575	0.0308265	0.989508	0.285269	0.336324	0.875135	0.26056	0.0877081	0.436166	0.0494215	0.526144	1.84322	0.336614	0.113309	0.666743	0.034937	0.0424286	0.0927764	0.303974	0.0128867	4.05116	0.00728105	0.0651081	0.216708	0.0423943	0.00179728	0.825556	0.084342	0.0986841	0.2455	0.169594	0.0167503	0.935631	0.00912695	0.159838	0.507562	0.0987666
35	4	1	0	0.00678901	0.0116109	0.0389886	0.230712	0.00266435	11.4742	0.00153025	0.00858127	0.0949617	0.0115483	0.000133364	0.584226	0.00489998	0.00844533	0.0221956	0.507671	0.0042848	35.0079	0.0024938	0.00639131	0.0916528	0.0084401	7.12354e-05	0.938452	0.00877592	0.0149754	0.04126	0.150417	0.00224269	5.69447	0.00126589	0.00889038	0.110382	0.0149098	0.000222302	0.443657	0.00265095	0.00440998	0.0233963	0.366365	0.00161706	46.3684	0.000903336	0.00311531	0.0396912	0.00441381
36	1	1	0	0.0920334	0.11667	0.579395	0.782846	0.0914314	3.90375	0.0532501	0.146769	0.823081	0.116794	0.0136408	0.860738	0.0945117	0.134699	0.629899	0.645055	0.0870159	2.82467	0.051401	0.123345	1.09093	0.134897	0.0181972	0.830789	0.0741461	0.104376	0.431692	0.791271	0.0826729	4.28541	0.0467808	0.104781	0.717533	0.104481	0.0109163	0.829537	0.0530561	0.0700094	0.218084	1.0856	0.0759997	8.8176	0.043215	0.0753557	0.42158	0.0700071
36	2	1	0	0.213385	0.240035	0.616877	0.133847	0.0321461	0.289585	0.0167038	0.42282	0.9565	0.240171	0.0576821	0.399411	0.051294	0.0876235	0.451286	0.659701	0.0578615	4.20655	0.0323601	0.0517296	0.756244	0.0877086	0.0076928	0.73761	0.059437	0.0822781	0.225936	0.301543	0.0248326	1.98598	0.0134685	0.0765216	0.571217	0.0823516	0.00678179	0.617353	0.144582	0.196224	0.548144	0.124415	0.024435	0.330169	0.0127355	0.180535	0.995691	0.196399
36	3	1	0	0.278458	0.336052	1.14484	0.33385	0.11228	0.522957	0.0591517	0.480329	1.83217	0.336319	0.11311	0.677364	0.407138	0.528434	1.5523	0.214938	0.113667	0.213103	0.0595986	0.686622	3.12093	0.528838	0.27967	0.557321	0.195496	0.253862	0.653665	0.20362	0.0517351	0.417195	0.026932	0.340839	1.54064	0.254076	0.0645548	0.54365	0.105695	0.139137	0.279098	0.192379	0.0267881	0.720688	0.0139739	0.16597	0.707938	0.139247
36	4	1	0	0.0115435	0.0143795	0.0443858	0.591048	0.00807237	24.3247	0.00453737	0.0208115	0.0660627	0.0136577	0.000186533	0.943716	0.0101489	0.0125999	0.0371335	0.983029	0.0121511	45.1099	0.00689238	0.0172985	0.0706869	0.0123609	0.000152791	0.824563	0.00893005	0.0109249	0.0248175	0.904987	0.00966972	47.6485	0.00543992	0.0158713	0.0563525	0.0106849	0.000114168	0.831055	0.00450757	0.00564484	0.0136274	0.766651	0.00418951	77.6548	0.00231899	0.00763631	0.0321777	0.00546469
36	1	1	0	0.0481241	0.0639481	0.234878	0.634254	0.0406266	5.49965	0.0225647	0.0721956	0.347048	0.0640541	0.00410293	0.778354	0.0475218	0.0690547	0.249262	0.800145	0.0553427	6.67171	0.0319168	0.0661275	0.596055	0.0691658	0.0047839	0.766597	0.0419369	0.0588273	0.175898	0.636383	0.0374733	5.85614	0.0203057	0.0517629	0.378888	0.0588848	0.00346742	0.784344	0.0421601	0.0580571	0.228141	0.832298	0.0483005	8.17003	0.027515	0.0600309	0.446987	0.0580327
36	2	1	0	0.207576	0.240505	0.809921	0.148243	0.0356853	0.323655	0.0187548	0.41789	1.1155	0.240722	0.0579469	0.408563	0.043628	0.0680687	0.457526	0.731492	0.0498154	6.00651	0.0278566	0.0536807	0.768745	0.068101	0.00463775	0.834622	0.0561059	0.0794834	0.154408	0.299595	0.0238227	2.0413	0.0129068	0.0658694	0.51528	0.0795162	0.00632282	0.606628	0.184612	0.260082	0.744733	0.126652	0.0329553	0.255593	0.0173053	0.208063	1.2585	0.260205
36	3	1	0	0.180546	0.230004	0.964939	0.274266	0.0631038	0.62739	0.0332126	0.329114	1.30046	0.230082	0.0529378	0.606057	0.245565	0.309692	0.620551	0.198692	0.0615959	0.338532	0.0325342	0.432527	1.70418	0.310006	0.0961038	0.52666	0.132217	0.165516	0.373251	0.163549	0.0270997	0.51845	0.0142345	0.220491	0.734049	0.165698	0.0274558	0.476069	0.0506468	0.0700166	0.140671	0.192139	0.0134575	1.46422	0.00718297	0.0700217	0.427619	0.0700405
36	4	1	0	0.0102483	0.0127459	0.0340527	0.818622	0.00989348	37.9362	0.00554096	0.0184744	0.0548539	0.0120855	0.00014606	0.902654	0.00828356	0.0101929	0.0216129	1.04104	0.0103739	59.264	0.00588489	0.0148179	0.0550501	0.00996492	9.92996e-05	0.891955	0.0101212	0.0131429	0.0387155	0.828586	0.0105902	36.263	0.00592379	0.0153751	0.0784841	0.0127811	0.000163356	0.963316	0.00413481	0.00541607	0.0139081	0.853476	0.00455133	88.9776	0.00253031	0.0064464	0.031007	0.0053327
36	1	1	0	0.0423077	0.0604253	0.375154	0.675224	0.040788	6.33541	0.0231177	0.056257	0.471918	0.0604066	0.00364896	0.871104	0.0556625	0.0785466	0.268289	0.722658	0.0568465	5.13915	0.0318003	0.0844767	0.654226	0.078663	0.00618786	0.869316	0.0394681	0.0527826	0.19685	0.553746	0.0292598	5.76078	0.0160843	0.0658619	0.44098	0.0528397	0.00279203	0.792662	0.0374726	0.051579	0.147598	0.669741	0.0345335	7.30718	0.0194275	0.0567635	0.462619	0.0515625
36	2	1	0	0.211896	0.243628	0.610953	0.143372	0.0349632	0.313593	0.0186493	0.418167	0.899453	0.243864	0.0594696	0.388213	0.0457266	0.0769585	0.367163	0.835599	0.0643078	6.21512	0.0368113	0.0478431	0.661496	0.0769601	0.00592286	0.63932	0.0448788	0.0706815	0.111541	0.414834	0.0293432	3.22389	0.0161305	0.0468142	0.462642	0.0707348	0.00500342	0.641267	0.15372	0.216438	0.628428	0.143618	0.031098	0.355209	0.0166544	0.167117	1.00631	0.216532
36	3	1	0	0.274668	0.367335	1.31646	0.236233	0.086855	0.331758	0.0448467	0.352573	1.95259	0.367667	0.135179	0.518576	0.316459	0.476269	1.81652	0.177977	0.0848292	0.197708	0.0449147	0.354182	3.57558	0.476631	0.227177	0.418028	0.170375	0.248973	0.879165	0.156951	0.0390981	0.321668	0.0199614	0.195677	1.67735	0.24911	0.0620559	0.348232	0.0907876	0.139816	0.522536	0.180863	0.0253108	0.662936	0.0129833	0.0915636	1.101	0.139945
36	4	1	0	0.0154522	0.0206428	0.0557278	0.442777	0.00866324	12.6989	0.00486136	0.0231553	0.0847934	0.0195657	0.000382817	0.866261	0.0104863	0.0130937	0.0317267	0.716468	0.00931137	31.2138	0.00527204	0.0184165	0.0742448	0.0129962	0.000168901	0.942691	0.00960972	0.012786	0.0213212	0.757146	0.00943667	34.1518	0.00530508	0.0144191	0.0680308	0.0124635	0.000155338	0.920012	0.00543229	0.00673292	0.0182058	0.705089	0.00471545	58.4922	0.00261611	0.00975237	0.0368514	0.00668774
36	1	1	0	0.041963	0.0634871	0.433009	0.56529	0.0359259	5.1095	0.0206372	0.0538023	0.527205	0.063553	0.00403899	0.875847	0.0495559	0.0773672	0.473237	0.528127	0.0408825	3.99634	0.0239475	0.0617412	0.736501	0.0774104	0.00599236	0.761566	0.0271834	0.0351363	0.0926619	0.750789	0.0263683	11.6724	0.0143974	0.0424092	0.211935	0.0351207	0.00123346	1.00187	0.0277565	0.0448918	0.301538	0.720851	0.0323824	9.25671	0.0186803	0.0345616	0.493803	0.0449225
36	2	1	0	0.204049	0.236502	0.598525	0.170117	0.0402746	0.373344	0.0209257	0.384258	0.936282	0.236747	0.0560493	0.484071	0.0482189	0.0707774	0.356693	0.844377	0.059827	6.71642	0.0337178	0.0635259	0.6281	0.0708534	0.00502021	0.845934	0.063173	0.0844979	0.147562	0.331138	0.0280047	2.16793	0.0155056	0.0868038	0.439661	0.0845711	0.00715228	0.612153	0.252389	0.331772	0.878359	0.118607	0.0393802	0.186171	0.0205232	0.348085	1.53748	0.332022
36	3	1	0	0.414469	0.496842	1.49936	0.265233	0.131902	0.276467	0.0683742	0.74954	2.10659	0.497307	0.247314	0.550824	0.446444	0.617121	1.69075	0.2082	0.128493	0.177591	0.0676417	0.626043	3.37779	0.617159	0.380886	0.453134	0.257579	0.358536	0.824472	0.174213	0.0625037	0.251509	0.0323747	0.314866	2.02153	0.358778	0.128722	0.4044	0.121068	0.177819	0.456918	0.196842	0.035005	0.572691	0.0181111	0.113203	0.950336	0.177833
36	4	1	0	0.0087076	0.01106	0.0269891	0.919033	0.0101552	47.204	0.00576357	0.0153162	0.0718476	0.0110499	0.000122099	0.913861	0.00893126	0.0116675	0.0514384	1.03622	0.0120528	51.0073	0.00690084	0.0142706	0.0894854	0.0116315	0.000135291	0.937198	0.0116651	0.0157146	0.0400463	0.787128	0.0122227	28.7719	0.00693763	0.0181405	0.0968536	0.0155282	0.000241125	0.939693	0.00625289	0.00821016	0.0145169	0.644979	0.00525525	43.3084	0.00287519	0.0101851	0.0414444	0.00814793
36	1	1	0	0.0505051	0.0743456	0.372133	0.594304	0.0442412	4.52751	0.0250898	0.0564011	0.470056	0.0744421	0.00554162	0.804122	0.0607972	0.0919957	0.436012	0.661151	0.0608088	4.13919	0.0350144	0.0771718	0.664342	0.0919742	0.00845925	0.769148	0.0356234	0.049081	0.207489	0.626903	0.0307498	7.04654	0.0169535	0.0531196	0.417609	0.0490503	0.00240593	0.783658	0.0350031	0.0488305	0.183225	0.815339	0.0398432	9.26897	0.0221342	0.0501014	0.419471	0.048867
36	2	1	0	0.192279	0.218036	0.469135	0.176783	0.0385535	0.423599	0.0201464	0.381305	0.799609	0.218083	0.0475602	0.530962	0.0529095	0.0791088	0.381531	0.796175	0.0630325	5.67486	0.0355687	0.0625193	0.6176	0.0791692	0.00626776	0.769321	0.0629227	0.085034	0.213088	0.33553	0.0285564	2.17533	0.0157568	0.0856752	0.51777	0.0851083	0.00724342	0.683742	0.220323	0.290058	0.649958	0.120219	0.0349039	0.215213	0.0181414	0.326562	1.23971	0.290336
36	3	1	0	0.30013	0.374859	1.4867	0.287799	0.107963	0.400498	0.0563602	0.517202	2.15208	0.375134	0.140725	0.596996	0.404519	0.526898	1.20346	0.207995	0.109684	0.20676	0.0574973	0.707511	3.05976	0.527339	0.278087	0.490852	0.230603	0.30468	0.619922	0.166075	0.0506449	0.278044	0.025857	0.37143	1.70241	0.304953	0.0929962	0.416862	0.108444	0.150945	0.3675	0.192395	0.0290577	0.65523	0.0149461	0.146239	0.936298	0.151032
36	4	1	0	0.015269	0.0203822	0.0695405	0.415598	0.00841475	11.5991	0.00475508	0.0217367	0.133874	0.0202473	0.000409954	0.910647	0.0122477	0.0175478	0.0779867	0.527353	0.00926536	17.4803	0.00539598	0.0163858	0.121621	0.0175696	0.00030869	0.954829	0.010976	0.0141904	0.0463965	0.567699	0.00804342	22.8832	0.00459369	0.0182341	0.0849598	0.0141685	0.000200745	0.995362	0.00562131	0.00768141	0.0374993	0.684083	0.00524852	49.7344	0.0029276	0.00855396	0.0547281	0.00767233
37	1	1	0	0.0631001	0.0840167	0.333867	0.751975	0.0632504	5.06198	0.0358129	0.0896655	0.499265	0.0841123	0.00707489	0.932246	0.0593852	0.0772695	0.32297	0.899842	0.0696082	6.49582	0.0388707	0.0911519	0.515115	0.0773561	0.00598396	0.922611	0.0646022	0.0862634	0.285882	0.741956	0.0640395	4.78094	0.0356167	0.0968794	0.582799	0.0863118	0.00744972	0.935471	0.0723002	0.0962084	0.342344	0.888	0.0854954	5.14873	0.0477264	0.111403	0.680199	0.0962785
37	2	1	0	0.260727	0.312979	0.693128	0.292328	0.0915536	0.507832	0.0498115	0.45219	1.2176	0.313188	0.0980865	0.67991	0.164083	0.21966	0.684462	0.666505	0.146658	1.68742	0.0817015	0.237886	1.22491	0.220041	0.0484179	0.802143	0.298846	0.371765	0.619181	0.17875	0.0665734	0.261756	0.0363083	0.441942	1.63146	0.372438	0.13871	0.477151	0.321245	0.396264	0.731433	0.203283	0.0806979	0.284164	0.0447808	0.56575	1.62841	0.396973
37	3	1	0	0.424245	0.515207	2.16308	0.524948	0.27042	0.560043	0.148616	0.768901	2.8411	0.515136	0.265365	0.879757	0.65214	0.823319	1.90734	0.347867	0.286196	0.232993	0.157704	1.11508	4.60733	0.822716	0.676862	0.746737	0.088628	0.114179	0.30891	0.802796	0.0917625	4.01117	0.0524073	0.135411	0.743131	0.114304	0.0130653	0.932701	0.106054	0.143423	0.532952	0.823778	0.11812	3.15713	0.0649114	0.149462	1.00526	0.143389
37	4	1	0	0.0325988	0.0477135	0.180309	0.96461	0.0460858	12.1871	0.0278183	0.0385286	0.334022	0.0477766	0.0022826	0.635187	0.0354656	0.0473003	0.164483	1.02207	0.0483929	12.0644	0.027046	0.0543687	0.285426	0.0473477	0.00224181	0.853805	0.0600251	0.0982743	0.279012	0.73181	0.0720014	3.9744	0.0384731	0.046156	0.613961	0.0983881	0.00968022	0.394778	0.030514	0.0455252	0.140842	0.792162	0.0361112	9.34525	0.0194199	0.0365036	0.281619	0.0455856
37	1	1	0	0.0584021	0.0806646	0.32674	0.606528	0.0489522	4.25795	0.027736	0.0780921	0.439724	0.0807089	0.00651393	0.859272	0.047488	0.0620221	0.258812	0.831971	0.0516717	7.65236	0.0295178	0.0696494	0.420204	0.0621075	0.00385734	0.931385	0.0620542	0.0794308	0.206449	0.641063	0.0507237	4.49191	0.0281223	0.0904622	0.503603	0.0791243	0.00626066	0.888971	0.0654606	0.0892929	0.34378	0.643975	0.05758	3.9406	0.0315041	0.0908133	0.570447	0.0894134
37	2	1	0	0.239361	0.270391	0.663873	0.304788	0.0823929	0.617632	0.0451351	0.491705	1.09983	0.270329	0.0730776	0.810742	0.137018	0.184784	0.627507	0.825854	0.152729	2.51142	0.085892	0.199144	1.352	0.184934	0.0342006	1.0103	0.257545	0.326511	0.653738	0.219663	0.0717842	0.362851	0.0387502	0.430992	1.53762	0.326793	0.106793	0.594588	0.229676	0.284637	0.578054	0.257812	0.0734492	0.495914	0.0402506	0.42754	1.32605	0.284894
37	3	1	0	0.401083	0.509456	1.99061	0.651353	0.332099	0.718979	0.186905	0.674663	2.69102	0.509861	0.259958	0.991196	0.594481	0.770374	2.1847	0.485553	0.374173	0.353608	0.209988	0.887406	4.8126	0.770613	0.593845	0.901792	0.122583	0.157625	0.51398	0.835435	0.131761	3.03111	0.0753962	0.19545	0.924913	0.157715	0.0248741	1.03211	0.144433	0.189591	0.599285	0.944284	0.179216	2.7802	0.100144	0.219153	1.11546	0.189791
37	4	1	0	0.0702833	0.0860059	0.247316	1.32565	0.114177	9.66067	0.071665	0.126026	0.41335	0.0861291	0.00741822	0.809831	0.0750542	0.0901428	0.227811	1.18646	0.107092	7.45249	0.0607178	0.140787	0.421724	0.0902625	0.00814732	0.865392	0.174845	0.196671	0.319515	1.06957	0.210661	2.88733	0.112008	0.364546	0.706227	0.196959	0.0387929	0.468934	0.106904	0.121236	0.198173	1.05292	0.12781	4.63938	0.0683591	0.222109	0.477672	0.121386
37	1	1	0	0.0510828	0.0678671	0.280238	0.800891	0.0544177	6.71053	0.0309807	0.0755031	0.43285	0.0679465	0.00461672	0.932087	0.0479136	0.0613059	0.269788	0.987753	0.0606307	8.98672	0.0338602	0.0817538	0.400008	0.0613825	0.00376781	0.931008	0.0542655	0.0717506	0.222272	0.754841	0.0541547	5.82229	0.0299678	0.0841194	0.48924	0.0717431	0.00514708	0.933867	0.0670177	0.0889398	0.313141	0.755068	0.0669431	4.73547	0.0372222	0.105249	0.591782	0.0886583
37	2	1	0	0.231301	0.270159	0.723272	0.331198	0.0894346	0.665311	0.0485132	0.457213	1.18081	0.270033	0.072918	0.777348	0.148822	0.197385	0.912036	0.753289	0.148823	2.1326	0.0832383	0.224224	1.43168	0.197564	0.0390315	1.00366	0.311394	0.365238	0.72515	0.182352	0.0666554	0.264538	0.0353457	0.656563	1.49699	0.365531	0.133613	0.486462	0.28115	0.331242	0.621566	0.24721	0.0819509	0.398367	0.0437783	0.546455	1.46792	0.331503
37	3	1	0	0.45548	0.546817	1.58805	0.689785	0.377578	0.708077	0.212161	0.824513	2.45527	0.547385	0.29963	0.946832	0.809228	1.00038	2.3325	0.432183	0.432167	0.241702	0.241684	1.33874	4.80851	0.999964	0.999928	0.849982	0.127952	0.164342	0.398919	0.967938	0.159293	3.32972	0.0901786	0.19768	0.833471	0.164569	0.027083	0.8976	0.177215	0.230774	0.678609	0.900832	0.208045	2.15857	0.115131	0.264211	1.39346	0.230947
37	4	1	0	0.0494476	0.0683009	0.251019	1.10676	0.075365	9.756	0.0452382	0.0648146	0.410259	0.0680953	0.00463697	0.806861	0.0571486	0.0731354	0.209715	1.09312	0.0800683	8.65375	0.0464294	0.0928127	0.385746	0.0732477	0.00536523	0.769861	0.103021	0.141468	0.365701	0.940827	0.133306	3.57727	0.0718177	0.12609	0.790376	0.14169	0.0200761	0.435757	0.0732959	0.10168	0.258017	0.915006	0.0931537	4.83058	0.0500669	0.0910435	0.537766	0.101807
37	1	1	0	0.0550838	0.0814953	0.444109	0.711791	0.0580704	4.96805	0.0330666	0.075292	0.556627	0.0815835	0.00665586	0.962616	0.0497682	0.0653313	0.334362	0.869144	0.0568593	7.63395	0.0326715	0.0862736	0.479929	0.0654199	0.00427976	0.891197	0.0620578	0.0796945	0.235576	0.82534	0.0657311	5.69848	0.0361438	0.101098	0.529491	0.0796411	0.00634271	0.806818	0.0705315	0.0967044	0.376548	0.757209	0.0733126	4.27399	0.0400644	0.0908045	0.615473	0.0968195
37	2	1	0	0.242294	0.288417	0.802817	0.407217	0.117552	0.772706	0.0643912	0.462448	1.37405	0.288673	0.083332	0.844929	0.166145	0.220623	0.839402	0.866742	0.191129	2.24719	0.109273	0.252884	1.52449	0.220514	0.0486266	1.08426	0.349655	0.419077	0.802319	0.220664	0.0925524	0.280277	0.0493062	0.6243	1.83124	0.419428	0.17592	0.593414	0.305269	0.366511	0.732198	0.317681	0.116527	0.470212	0.0632651	0.560066	1.62427	0.366805
37	3	1	0	0.349833	0.438313	1.85695	0.749773	0.328858	0.959766	0.184639	0.583503	2.61929	0.43861	0.192379	1.0576	0.617152	0.766177	1.85995	0.515447	0.39528	0.372048	0.218797	1.00447	4.43647	0.766869	0.588088	0.975569	0.12424	0.158263	0.479193	1.0042	0.159018	3.57753	0.0897086	0.203345	0.978343	0.158353	0.0250756	1.05061	0.146576	0.187362	0.707873	1.0292	0.193002	3.06825	0.107899	0.239376	1.28004	0.187526
37	4	1	0	0.0796998	0.0963897	0.320336	1.38879	0.134069	8.97508	0.0836424	0.144037	0.504896	0.0965371	0.0093194	0.735976	0.0868781	0.103915	0.213406	0.964262	0.0997106	5.11519	0.0546958	0.153094	0.503535	0.103406	0.0106928	0.813965	0.188243	0.211406	0.331173	1.09454	0.231768	2.78241	0.124757	0.403824	0.811054	0.211749	0.0448377	0.478926	0.114441	0.130361	0.256229	1.0765	0.140564	4.44014	0.0757039	0.239816	0.575477	0.130575
37	1	1	0	0.0472386	0.0694114	0.457801	0.679624	0.0472226	5.5182	0.0266416	0.0663497	0.583884	0.0694834	0.00482795	1.00056	0.0599344	0.0805324	0.423188	0.872735	0.0703351	6.06773	0.03941	0.096303	0.712748	0.0805916	0.006495	1.04114	0.0403013	0.0572234	0.165629	0.655841	0.0375711	6.24367	0.0204904	0.0604364	0.457651	0.0572869	0.00328179	0.886568	0.0592446	0.0839891	0.503765	0.720789	0.0606045	4.75007	0.033581	0.0885577	0.718764	0.0840808
37	2	1	0	0.210249	0.242242	0.589978	0.375194	0.0909542	0.849179	0.0499038	0.418253	1.05516	0.242419	0.0587671	0.906093	0.149842	0.197832	0.5183	0.974569	0.192842	2.72173	0.106567	0.221736	1.22605	0.197874	0.0391541	0.942458	0.313887	0.369006	0.659475	0.187729	0.0693231	0.270765	0.0369219	0.608498	1.46611	0.369271	0.136361	0.549758	0.248564	0.300294	0.612965	0.261994	0.0787152	0.474958	0.0428735	0.431691	1.29969	0.300446
37	3	1	0	0.42589	0.519242	1.57658	0.609775	0.316925	0.6577	0.177665	0.75961	2.60309	0.519741	0.270131	1.02113	0.756071	0.943855	2.20607	0.408843	0.385824	0.241132	0.214744	1.31622	4.79012	0.943697	0.890565	0.957129	0.117691	0.154732	0.472719	0.93204	0.144125	3.40163	0.0813382	0.184112	1.00349	0.154634	0.0239115	0.975451	0.171843	0.230215	1.14481	0.881607	0.203179	2.11603	0.112391	0.268801	1.83645	0.230465
37	4	1	0	0.0707693	0.0924995	0.250962	1.18961	0.110037	7.78503	0.0666082	0.10766	0.476274	0.0924983	0.00855593	0.892509	0.0562552	0.0734994	0.207396	1.1765	0.086601	9.5468	0.0517277	0.0852855	0.419817	0.0736093	0.00541833	0.778676	0.16882	0.203993	0.363363	1.03539	0.211525	2.71412	0.113277	0.282425	0.8306	0.204295	0.0417363	0.470412	0.0984797	0.119388	0.232318	1.0324	0.123448	4.63408	0.0662583	0.180506	0.53507	0.119574
38	1	1	0	0.130784	0.16068	0.584549	0.727769	0.117091	2.5976	0.0672407	0.219448	0.799087	0.16089	0.0258857	0.825982	0.124214	0.186273	0.61807	0.753772	0.140596	2.27623	0.0791924	0.147014	1.25368	0.186523	0.034791	0.858776	0.10378	0.153031	0.608062	0.665982	0.102043	2.42827	0.0570085	0.11276	1.17601	0.153222	0.023477	0.750664	0.0805631	0.10563	0.31569	0.882889	0.0933738	4.77634	0.0534236	0.130911	0.690254	0.105759
38	2	1	0	0.374115	0.436524	1.18303	0.483564	0.211153	0.616126	0.117477	0.715567	2.02655	0.436659	0.190671	0.899542	0.235985	0.32484	0.963644	0.844544	0.274534	1.54514	0.163273	0.356689	2.40285	0.325068	0.105669	1.04007	0.268529	0.320895	0.708876	0.323606	0.103943	0.550957	0.0568435	0.478402	1.41567	0.321204	0.103172	0.809191	0.69899	0.818254	1.80287	0.265208	0.217235	0.179111	0.120173	1.4256	3.26093	0.819111
38	3	1	0	0.69055	0.811263	2.45865	0.554337	0.450247	0.387158	0.255413	1.36977	3.72432	0.812227	0.659713	0.947892	1.13239	1.39312	3.33444	0.364451	0.508346	0.148403	0.288723	2.08006	7.0905	1.39483	1.94554	0.867919	0.248584	0.327076	0.778322	0.351651	0.115139	0.58775	0.0630109	0.345928	1.71502	0.327425	0.107207	0.758557	0.202057	0.274512	0.76796	0.602206	0.165515	1.27057	0.0959805	0.272616	1.67894	0.274848
38	4	1	0	0.0166154	0.0228785	0.0850414	0.432643	0.00984296	10.9274	0.00565597	0.0225403	0.132007	0.0227507	0.000517596	0.942675	0.0195304	0.0266325	0.12366	1.0757	0.0284908	23.8884	0.0167577	0.0289629	0.213078	0.0264859	0.000701501	0.985358	0.00849753	0.0110701	0.0363244	0.812983	0.00899452	42.7662	0.00523472	0.013571	0.0766345	0.0110636	0.000122403	1.0456	0.0133008	0.0170965	0.0446126	0.969813	0.0165457	32.7509	0.00953271	0.0214927	0.106666	0.0170607
38	1	1	0	0.144729	0.185418	0.804467	0.868654	0.16123	2.63005	0.0906065	0.252387	1.10558	0.185608	0.0344505	0.989147	0.156426	0.217953	0.6805	0.885715	0.193257	2.28614	0.108839	0.211141	1.46662	0.218193	0.0476083	0.986805	0.149833	0.199746	0.673109	0.653404	0.130658	1.80366	0.0721215	0.217703	1.148	0.199966	0.0399862	0.948924	0.138828	0.179319	0.552405	0.790633	0.141923	2.53221	0.0815936	0.220354	1.21098	0.179506
38	2	1	0	0.446871	0.517546	1.19149	0.439819	0.227853	0.462242	0.12406	0.903874	2.0447	0.518062	0.268388	0.837995	0.189176	0.245139	0.619105	0.944186	0.23117	2.23882	0.134205	0.306793	1.39619	0.244836	0.0599445	0.904147	0.238662	0.296518	0.603374	0.327687	0.0972435	0.611411	0.0538439	0.385688	1.31471	0.296758	0.0880651	0.837303	0.83238	0.977665	2.08691	0.244233	0.239059	0.136943	0.131203	1.74398	4.10633	0.978817
38	3	1	0	0.700639	0.827953	2.52465	0.562756	0.466404	0.384265	0.263946	1.29571	3.71391	0.828786	0.686886	0.997388	1.08787	1.3593	3.71325	0.374284	0.509315	0.155	0.287015	1.83547	7.03433	1.36077	1.8517	0.870481	0.283072	0.356654	0.780624	0.333243	0.118981	0.505484	0.064438	0.472821	1.9225	0.35704	0.127478	0.71593	0.270568	0.364183	0.988648	0.497631	0.181422	0.774662	0.102962	0.373925	2.01936	0.364572
38	4	1	0	0.0251522	0.0343997	0.0971977	0.340818	0.0115017	5.79603	0.00660095	0.0341966	0.159129	0.0337472	0.00113888	0.805499	0.0214216	0.0278371	0.0995838	1.03413	0.0288231	21.5869	0.0167695	0.0330616	0.184805	0.0278718	0.000776836	1.01576	0.00930607	0.0120199	0.0392077	0.893208	0.0107124	42.5397	0.00611871	0.0156465	0.0793257	0.0119931	0.000143835	1.02033	0.0121991	0.0154475	0.035423	1.09192	0.0168883	39.8666	0.00953672	0.020317	0.0877057	0.0154666
38	1	1	0	0.170354	0.219998	0.932543	0.77058	0.169647	1.99965	0.0969194	0.271153	1.33017	0.220155	0.0484683	1.0279	0.172889	0.240663	0.86204	0.797047	0.191916	1.88658	0.109378	0.226848	1.70155	0.240784	0.057977	0.994562	0.166594	0.229934	0.721745	0.63326	0.145732	1.5177	0.0803767	0.226817	1.62706	0.230129	0.0529595	0.954082	0.154828	0.208511	0.883446	0.784749	0.163575	2.17716	0.0945938	0.234068	1.43665	0.208442
38	2	1	0	0.52407	0.600074	1.45554	0.430157	0.258516	0.386752	0.139687	1.06045	2.38573	0.600982	0.361179	0.741655	0.145134	0.191113	0.861855	0.985087	0.188536	3.02056	0.110643	0.232421	1.30048	0.19139	0.03663	0.833839	0.197501	0.255379	0.4952	0.357044	0.0913201	0.772231	0.0505169	0.282631	1.33927	0.255767	0.0654168	0.697075	0.864192	1.05415	2.42268	0.249228	0.263132	0.127744	0.142395	1.59439	4.47451	1.05579
38	3	1	0	0.682763	0.810359	2.38175	0.643006	0.521399	0.451198	0.296673	1.35126	3.59371	0.810878	0.657524	1.07462	1.10647	1.36128	3.4415	0.42837	0.583735	0.178994	0.332377	1.96122	6.77297	1.36269	1.85692	0.973662	0.255082	0.334794	1.0359	0.393524	0.131886	0.642125	0.0721236	0.364079	2.12121	0.335142	0.11232	0.77131	0.29073	0.38437	0.969423	0.514901	0.198018	0.771747	0.11414	0.423225	2.20111	0.384575
38	4	1	0	0.0259788	0.0341237	0.105424	0.318288	0.0106561	5.50963	0.00617561	0.038275	0.165433	0.0334795	0.00112088	0.791852	0.0210224	0.028291	0.100188	1.09396	0.0309033	22.6975	0.0181126	0.0307131	0.20748	0.0282489	0.000797998	0.940368	0.00874454	0.0106798	0.0268297	0.859225	0.00918245	45.9402	0.00524683	0.0151046	0.0553506	0.0106869	0.00011421	0.968716	0.0126518	0.0163283	0.0491344	1.04726	0.0170353	37.0876	0.0098133	0.0213511	0.0996932	0.0162665
38	1	1	0	0.183791	0.245153	0.985202	0.798844	0.196114	1.84105	0.110958	0.273679	1.34525	0.245497	0.0602687	0.91962	0.180456	0.254464	0.984893	0.809534	0.206112	1.79975	0.116668	0.231524	1.67335	0.254606	0.0648244	0.955929	0.18033	0.241174	0.592067	0.605229	0.146143	1.38684	0.0808616	0.274464	1.42986	0.241467	0.0583062	0.927615	0.165911	0.22142	0.777765	0.805904	0.178689	2.09163	0.102829	0.240302	1.47835	0.221725
38	2	1	0	0.509858	0.591151	1.50687	0.428248	0.253449	0.388349	0.136023	1.06245	2.44486	0.591827	0.35026	0.732292	0.186442	0.245003	0.774857	0.989835	0.242801	2.33517	0.140506	0.295268	1.45211	0.245295	0.0601694	0.973514	0.233824	0.295217	0.703773	0.430312	0.127013	0.789157	0.0687536	0.382802	1.46363	0.295166	0.0871228	0.811303	0.951219	1.1207	2.38044	0.236701	0.265164	0.112934	0.141728	1.84231	4.55165	1.12025
38	3	1	0	0.705114	0.832048	2.70839	0.646525	0.538502	0.441211	0.306091	1.32161	4.11266	0.832918	0.693752	1.06217	1.17144	1.43646	3.71736	0.445076	0.639988	0.175322	0.362504	2.07932	7.67687	1.43793	2.06765	0.933713	0.277259	0.336022	0.817522	0.417347	0.140366	0.682516	0.0772042	0.51454	1.69456	0.336329	0.113117	0.812757	0.352303	0.44847	1.06206	0.527262	0.236687	0.680155	0.137058	0.567669	2.43873	0.448899
38	4	1	0	0.026768	0.0371652	0.126059	0.443874	0.0157296	7.27846	0.00914025	0.0381194	0.173062	0.0354372	0.00125579	0.898087	0.0268799	0.0335653	0.102096	1.22506	0.0411371	21.2826	0.0239981	0.0452108	0.192388	0.0335796	0.00112759	0.785894	0.0130513	0.0165433	0.048619	1.13275	0.0186884	40.3213	0.0109751	0.0210274	0.112473	0.0164982	0.000272192	0.965367	0.0143061	0.0182282	0.0478477	1.11679	0.0203848	35.1206	0.0117013	0.0251024	0.124222	0.0182531
38	1	1	0	0.213848	0.270903	1.24452	0.78406	0.212578	1.62104	0.11916	0.330898	1.80901	0.271124	0.0735084	0.969179	0.20367	0.281853	0.853158	0.802213	0.226223	1.58414	0.125975	0.26323	1.67415	0.281998	0.079523	0.945516	0.164253	0.222102	0.728288	0.668462	0.148605	1.67929	0.0829921	0.236322	1.55601	0.222308	0.049421	0.984294	0.217834	0.29222	1.13729	0.720597	0.210674	1.38416	0.11831	0.33505	2.30727	0.29236
38	2	1	0	0.549847	0.628879	1.67649	0.454042	0.285884	0.390473	0.154803	1.15499	2.68729	0.629642	0.396449	0.827867	0.227325	0.308463	1.27675	1.02541	0.316656	1.93131	0.184176	0.334219	2.2365	0.308809	0.0953631	0.903031	0.202981	0.267687	0.606388	0.440756	0.118126	0.881766	0.0633358	0.265105	1.38488	0.268008	0.0718284	0.815179	0.968684	1.1528	2.56118	0.266917	0.308073	0.123789	0.164906	1.89464	4.51245	1.15419
38	3	1	0	0.733803	0.875068	2.46007	0.707445	0.619714	0.457208	0.350842	1.34308	3.8131	0.87599	0.767358	1.03784	1.19055	1.47052	3.60632	0.491756	0.72388	0.18729	0.405834	2.11129	7.00029	1.47203	2.16687	0.958486	0.307191	0.380721	0.912798	0.415826	0.158474	0.594125	0.0862923	0.511654	2.03208	0.381107	0.145243	0.847385	0.329113	0.434121	1.38208	0.598713	0.260185	0.783145	0.1479	0.508366	2.58208	0.434574
38	4	1	0	0.0186026	0.0293172	0.11419	0.388606	0.0109253	7.95832	0.00629021	0.0215414	0.161425	0.028114	0.000790394	0.922873	0.0230021	0.0291692	0.098078	1.21038	0.0353204	24.6336	0.0209767	0.0384069	0.184062	0.0291813	0.000851546	0.94444	0.00969161	0.0119411	0.0335823	1.22997	0.0146849	60.4124	0.00861139	0.0168001	0.0734713	0.0119392	0.000142543	1.01341	0.0149702	0.0199508	0.0535231	1.1416	0.0227981	32.6077	0.0130045	0.0238535	0.151847	0.0199704
39	1	1	0	0.0728888	0.0958589	0.419905	0.787089	0.0754987	4.73543	0.0435703	0.111745	0.602559	0.0959214	0.00920092	0.944136	0.0723524	0.0975347	0.345749	0.639093	0.0623688	3.77009	0.0359053	0.106541	0.612736	0.0975896	0.00952373	0.774804	0.0760651	0.0973025	0.300059	0.692235	0.0674469	3.95782	0.0375727	0.117077	0.611313	0.0974335	0.00949328	0.857286	0.113111	0.147226	0.552925	0.604266	0.0888317	2.3237	0.050218	0.187791	0.975451	0.147008
39	2	1	0	0.278161	0.337468	1.0718	0.24269	0.0819607	0.400252	0.0456501	0.538963	1.56183	0.337718	0.114053	0.602607	0.140281	0.208488	0.538562	0.604413	0.12594	1.62729	0.0706519	0.169464	1.2888	0.208367	0.0434168	0.760581	0.0802799	0.110545	0.271914	0.466083	0.0514693	2.32262	0.0283236	0.123476	0.704493	0.11043	0.0121947	0.763292	0.23851	0.32756	1.18122	0.24721	0.0809236	0.426454	0.0456972	0.251679	1.83591	0.327347
39	3	1	0	0.422919	0.501055	1.53806	0.338171	0.169576	0.376769	0.0947389	0.820059	2.33428	0.501449	0.251451	0.775437	0.359578	0.474769	1.25414	0.340511	0.161817	0.402344	0.0908629	0.543689	2.9734	0.47522	0.225834	0.732621	0.144077	0.199883	0.879414	0.328079	0.0656286	0.904956	0.0362123	0.202767	1.44417	0.200039	0.0400155	0.615847	0.0688344	0.0963573	0.336792	0.537285	0.0517623	3.12578	0.029012	0.0899927	0.666981	0.0963406
39	4	1	0	0.00863372	0.0113324	0.0422745	0.535958	0.00597987	27.5506	0.00342966	0.0135003	0.0765204	0.0111573	0.000124486	0.935768	0.0149325	0.021421	0.037303	0.382392	0.00793859	10.4943	0.00452295	0.0186903	0.107761	0.0207604	0.000430993	0.794726	0.00643659	0.00826631	0.0216057	0.684383	0.00559361	47.6414	0.00318251	0.010622	0.0528044	0.00817321	6.68014e-05	1.02149	0.00746032	0.00994455	0.0315679	0.64117	0.00630659	36.1239	0.00349493	0.0110849	0.0586996	0.00983608
39	1	1	0	0.0497295	0.06405	0.231496	0.822809	0.0527779	7.37585	0.0303471	0.0749696	0.342952	0.0641435	0.00411439	0.974607	0.0460175	0.0622332	0.233672	0.664939	0.0413888	6.09177	0.0236018	0.069122	0.431875	0.0622444	0.00387437	0.890556	0.050485	0.0700769	0.215378	0.713034	0.0500402	5.65874	0.02787	0.0648262	0.453479	0.0701792	0.00492513	0.874225	0.0762284	0.0950487	0.241657	0.782338	0.0744547	4.67099	0.0423063	0.12801	0.542962	0.0951695
39	2	1	0	0.276972	0.328023	0.921423	0.242731	0.079642	0.402759	0.043359	0.578997	1.39665	0.328108	0.107655	0.601325	0.151233	0.22767	0.495035	0.630408	0.143654	1.54812	0.080389	0.165234	1.3907	0.227874	0.0519267	0.787019	0.0803718	0.107725	0.326183	0.462579	0.0498566	2.38123	0.0276615	0.118606	0.68974	0.10778	0.0116165	0.804918	0.280769	0.369454	1.17483	0.211812	0.0782929	0.316131	0.0431925	0.477471	1.91696	0.369633
39	3	1	0	0.425298	0.500265	1.40802	0.291983	0.146136	0.324133	0.0811938	0.826799	2.0792	0.500495	0.250495	0.686029	0.362577	0.493501	1.25043	0.283537	0.140065	0.32302	0.0788256	0.463833	2.77402	0.493991	0.244027	0.656417	0.151868	0.210706	0.795698	0.28114	0.0592905	0.73539	0.0327072	0.217305	1.57053	0.210893	0.044476	0.622214	0.0623861	0.0834697	0.254711	0.576203	0.0480816	3.98383	0.0277401	0.0931301	0.556142	0.0834456
39	4	1	0	0.0167163	0.0246664	0.15054	0.347685	0.00829992	8.21405	0.00468095	0.0243896	0.187952	0.023872	0.000569871	0.614272	0.0228485	0.0360745	0.0413879	0.32612	0.0112255	5.3806	0.00637516	0.0294924	0.227754	0.0344215	0.00118484	0.647123	0.00981207	0.0132042	0.0315952	0.551628	0.00711899	24.3415	0.00405408	0.0157378	0.0955061	0.0129054	0.00016655	0.854286	0.0079423	0.00984262	0.0271408	0.692878	0.0068156	38.3006	0.00370595	0.0138621	0.0513349	0.00983665
39	1	1	0	0.063702	0.0816807	0.309571	0.869187	0.0707975	6.12147	0.040613	0.108865	0.474465	0.0814526	0.00663452	0.996754	0.0566852	0.0729776	0.196522	0.756432	0.0551891	5.92397	0.0315341	0.0920843	0.479636	0.0729598	0.00532313	0.957143	0.0745352	0.0974834	0.310235	0.620832	0.0604684	3.56734	0.0338418	0.114475	0.61927	0.097399	0.00948656	0.921812	0.0915074	0.115793	0.377084	0.757789	0.0876293	3.75819	0.0502551	0.147454	0.688824	0.115638
39	2	1	0	0.265312	0.316348	0.898049	0.253406	0.0801903	0.429624	0.0430228	0.514783	1.40892	0.31645	0.100141	0.571534	0.154716	0.219352	0.404577	0.657252	0.144158	1.65176	0.0794623	0.164834	1.29683	0.219335	0.0481077	0.773908	0.0944899	0.118717	0.349931	0.454332	0.0540037	2.10376	0.0297232	0.151881	0.660498	0.118864	0.0141286	0.826611	0.360374	0.45311	1.29104	0.185361	0.0840901	0.220543	0.0453886	0.634159	2.11647	0.453656
39	3	1	0	0.40058	0.474466	1.38989	0.304449	0.144538	0.362739	0.0817572	0.767012	2.15774	0.474751	0.225388	0.737908	0.492282	0.626173	1.32868	0.220462	0.138147	0.199018	0.0781455	0.714341	3.19336	0.626622	0.392655	0.623271	0.137151	0.205141	0.753443	0.264784	0.0543598	0.721525	0.0304106	0.16568	1.41411	0.205299	0.0421476	0.593753	0.0736167	0.105921	0.255877	0.435964	0.0457762	2.34666	0.025872	0.0968407	0.739181	0.105
39	4	1	0	0.0174472	0.0221657	0.0742952	0.271949	0.00602246	7.00348	0.00343468	0.0270912	0.131015	0.0221455	0.000490425	0.686559	0.0200793	0.0266196	0.0808097	0.470534	0.0122237	10.5173	0.00709792	0.0291109	0.199406	0.0259785	0.000674881	0.828401	0.0104509	0.0146941	0.0475787	0.432529	0.00630427	16.734	0.00355501	0.0153132	0.0736848	0.0145754	0.000212442	0.816792	0.010734	0.0129466	0.0336397	0.635659	0.00819451	27.2103	0.004522	0.0198938	0.0641633	0.0128914
39	1	1	0	0.0343693	0.0447458	0.184905	0.905642	0.0405484	11.4874	0.023028	0.0513269	0.259154	0.0447731	0.00200463	0.987683	0.0309994	0.0428534	0.154813	0.837278	0.035875	11.2343	0.0206248	0.0437107	0.327313	0.0428471	0.00183588	0.97267	0.0428913	0.0555767	0.225296	0.870174	0.0483764	8.99698	0.0278068	0.0700557	0.361417	0.0555939	0.00309068	1.02103	0.0520263	0.0671325	0.238143	0.816867	0.0548554	6.86603	0.030963	0.0814858	0.457347	0.0671535
39	2	1	0	0.317689	0.364803	0.967895	0.205355	0.0749663	0.303754	0.0404801	0.668649	1.50138	0.365056	0.133266	0.522293	0.181529	0.267955	0.688649	0.533848	0.143003	1.1142	0.07995	0.19436	1.96432	0.267872	0.0717555	0.698176	0.100185	0.133096	0.418722	0.330513	0.0440423	1.36875	0.0243046	0.138762	0.760944	0.133254	0.0177567	0.671253	0.354274	0.45859	1.22029	0.166947	0.0766539	0.198952	0.0419429	0.580058	1.98464	0.459151
39	3	1	0	0.44495	0.520551	1.46346	0.293239	0.152765	0.307845	0.0835478	0.881069	2.18418	0.520957	0.271396	0.728988	0.505207	0.654437	1.24476	0.226514	0.14834	0.190485	0.0816932	0.721245	3.29243	0.654882	0.42887	0.621149	0.124575	0.18431	0.67258	0.251556	0.0463977	0.741701	0.0252322	0.142315	1.21735	0.184443	0.0340193	0.621699	0.0715502	0.107464	0.306533	0.453605	0.0484345	2.33183	0.0265858	0.0832429	0.809885	0.106777
39	4	1	0	0.012453	0.0171511	0.0586574	0.494672	0.0082108	17.0005	0.00468378	0.0188595	0.0887659	0.0165985	0.000275509	0.903394	0.0170268	0.0249291	0.0670083	0.582227	0.0140614	13.7404	0.00801435	0.0207941	0.156818	0.024151	0.000583271	0.832281	0.0101664	0.0139098	0.0503514	0.626108	0.00861905	25.0194	0.0047413	0.0155806	0.0931055	0.0137661	0.000189505	0.895626	0.0109523	0.0147509	0.0642798	0.674514	0.00995514	25.1363	0.00547537	0.0172602	0.136697	0.014759
39	1	1	0	0.0335019	0.0430051	0.168212	0.828351	0.0355606	10.8649	0.0200234	0.0561968	0.305111	0.0429294	0.00184293	1.14449	0.0357449	0.0460508	0.137564	0.878602	0.0403902	11.0274	0.0233046	0.0589587	0.299033	0.045971	0.00211334	1.19021	0.037225	0.0504329	0.193643	0.825284	0.0415888	9.23105	0.0234422	0.0508578	0.35354	0.0503933	0.00253949	1.0484	0.0488197	0.0643689	0.225132	0.79747	0.0513456	6.94625	0.0287957	0.0760662	0.466868	0.0643856
39	2	1	0	0.286823	0.330085	0.779372	0.223545	0.0738377	0.363698	0.0396796	0.624365	1.30562	0.330304	0.1091	0.584689	0.172919	0.24608	0.567856	0.564199	0.138839	1.27723	0.0773446	0.182463	1.66629	0.246082	0.0605563	0.735166	0.10454	0.142848	0.515427	0.355332	0.0507724	1.37384	0.0280494	0.150383	0.95079	0.142887	0.0204168	0.70673	0.298474	0.375441	0.98098	0.181903	0.068308	0.261384	0.0368589	0.553466	1.70708	0.375519
39	3	1	0	0.418155	0.505603	1.50039	0.315433	0.159594	0.347273	0.088898	0.759351	2.32271	0.505953	0.255988	0.770544	0.648788	0.800758	1.48904	0.198996	0.158983	0.13888	0.0886445	1.07834	3.77006	0.798926	0.638283	0.60053	0.147999	0.20964	0.644941	0.24441	0.0512726	0.636101	0.0279936	0.177959	1.18101	0.209781	0.0440081	0.606654	0.118193	0.159719	0.464678	0.298495	0.0477082	1.03997	0.0265665	0.176055	1.17349	0.159829
39	4	1	0	0.018679	0.0273033	0.0802411	0.24404	0.00666596	5.07096	0.00378351	0.0221682	0.155475	0.0273151	0.000746114	0.685167	0.0115594	0.0154666	0.0322504	0.716717	0.0105867	27.9535	0.006099	0.0194296	0.0919465	0.014771	0.000218183	0.999387	0.00917909	0.0128721	0.0551653	0.559587	0.0071955	24.5211	0.0040544	0.0124154	0.0847333	0.0128586	0.000165344	0.948423	0.011138	0.0134788	0.0306844	0.590294	0.00794276	23.7789	0.00430524	0.0200833	0.0642345	0.0134556
40	1	1	0	0.0646067	0.080805	0.322732	0.958451	0.0775514	6.6694	0.0436642	0.10834	0.448524	0.0809133	0.00654696	0.962829	0.0343105	0.0471436	0.15981	0.890991	0.0420249	11.0117	0.0244975	0.0494045	0.324892	0.0471664	0.00222467	0.95449	0.0920603	0.113812	0.384684	0.793548	0.0902927	3.80714	0.0492899	0.161362	0.647324	0.113784	0.0129467	0.938367	0.082062	0.103444	0.276208	0.789493	0.0816679	4.27277	0.045721	0.135686	0.651951	0.103443
40	2	1	0	0.29967	0.34248	0.839522	0.280032	0.0959694	0.443901	0.0521358	0.61635	1.3875	0.342708	0.117449	0.717019	0.134635	0.177294	0.596132	0.528533	0.0935327	1.66872	0.0522598	0.189109	1.15097	0.176967	0.0313173	0.939518	0.123993	0.167436	0.358784	0.221499	0.0371219	0.717402	0.0201503	0.169034	0.880241	0.167594	0.0280878	0.595284	0.4833	0.588472	1.28559	0.165506	0.0974854	0.15264	0.0529566	0.897176	2.42554	0.589014
40	3	1	0	0.407628	0.474451	1.05797	0.466612	0.221554	0.548416	0.123639	0.791885	1.97264	0.474814	0.225448	1.00277	0.761447	0.872299	1.62127	0.242418	0.211559	0.154304	0.11752	1.57391	3.37763	0.872705	0.761613	0.717746	0.440647	0.510721	0.991458	0.239225	0.122266	0.256091	0.0668952	0.858993	2.06774	0.511094	0.261217	0.709577	0.125037	0.167134	0.485102	0.489482	0.0818864	1.63541	0.0457695	0.187532	1.10777	0.167292
40	4	1	0	0.00871451	0.0128028	0.0398084	0.29891	0.00374258	13.5036	0.00211695	0.0110855	0.0858821	0.0125207	0.000156769	0.708626	0.00834638	0.0137046	0.0573213	0.364796	0.00487542	15.7813	0.00281881	0.00988415	0.110158	0.0133648	0.000178617	0.822783	0.00506479	0.00705979	0.0188199	0.545802	0.00370018	45.41	0.00208703	0.00751714	0.0514169	0.00677935	4.59596e-05	0.999729	0.00509747	0.00709335	0.0161646	0.435787	0.00307632	34.0872	0.00169866	0.00754481	0.0506732	0.00705923
40	1	1	0	0.0759469	0.111328	0.551366	0.804073	0.0896433	4.17296	0.0518668	0.104952	0.750454	0.111487	0.0124293	0.994778	0.0722209	0.0983769	0.422342	0.815909	0.0803614	4.73781	0.045961	0.116423	0.737827	0.0984931	0.0097009	0.86855	0.0937101	0.127416	0.562478	0.725312	0.092525	3.13458	0.051009	0.142231	0.981379	0.127566	0.016273	0.832147	0.0956356	0.129892	0.547587	0.76196	0.0990743	3.28417	0.0555242	0.155983	1.08412	0.130025
40	2	1	0	0.252734	0.293347	0.691487	0.234846	0.0687993	0.430975	0.0369873	0.480686	1.18663	0.292955	0.0858224	0.549909	0.106514	0.134491	0.392519	0.540151	0.0721571	2.25423	0.0402277	0.159783	0.726605	0.133587	0.0178454	0.765703	0.194564	0.233262	0.424992	0.168166	0.0393021	0.38704	0.0211402	0.397691	0.927307	0.23371	0.0546203	0.51702	0.472961	0.545604	1.02293	0.129098	0.0705705	0.126514	0.0378047	1.04722	1.87405	0.546644
40	3	1	0	0.332187	0.404674	1.41101	0.385041	0.155971	0.524968	0.0861406	0.587052	2.12716	0.405077	0.164087	0.803894	0.590906	0.70675	1.45421	0.209351	0.148105	0.161898	0.0810272	1.1118	3.51693	0.707448	0.500482	0.577956	0.251221	0.299784	0.789086	0.23292	0.0698871	0.425757	0.0383301	0.486212	1.50022	0.300047	0.0900283	0.629375	0.093225	0.137385	0.349211	0.388189	0.0533177	1.59228	0.0300384	0.111079	1.02013	0.13735
40	4	1	0	0.0177417	0.0240176	0.0572898	0.141365	0.00339534	3.31058	0.00190981	0.0254654	0.120524	0.0240183	0.000576879	0.457034	0.0108515	0.0150189	0.0523958	0.352356	0.0048784	14.9998	0.00287526	0.0192107	0.0951295	0.0138451	0.000191687	0.875286	0.00972818	0.0140489	0.0484981	0.259094	0.00361941	10.424	0.00203422	0.0134257	0.0721876	0.0139695	0.000195147	0.72153	0.00535327	0.00726797	0.0142414	0.412994	0.00290307	31.8758	0.00157502	0.00762792	0.0418079	0.00702932
40	1	1	0	0.0705744	0.0938345	0.413387	0.895814	0.0841931	5.40268	0.0477229	0.109504	0.608855	0.093985	0.00883318	0.919964	0.0501783	0.0690934	0.307973	0.835611	0.057828	6.95575	0.0333129	0.074892	0.548508	0.0692045	0.00478927	0.945933	0.0902366	0.11096	0.382075	0.723569	0.0803894	3.50888	0.0433118	0.159266	0.711441	0.111101	0.0123435	0.805994	0.0899211	0.117318	0.312109	0.747389	0.0877439	3.50012	0.0482419	0.144895	0.754287	0.117401
40	2	1	0	0.247381	0.278807	0.440408	0.288902	0.0806218	0.556863	0.0433661	0.529855	0.952498	0.279062	0.0778758	0.713521	0.114401	0.141786	0.405877	0.577182	0.0815294	2.26182	0.0451296	0.190038	0.717607	0.141254	0.0199528	0.928356	0.214639	0.260721	0.471714	0.179026	0.0464533	0.37224	0.0250624	0.41636	1.02096	0.259477	0.0673285	0.519249	0.450675	0.522942	0.98599	0.14929	0.0777076	0.153678	0.0416367	0.935449	1.88137	0.520515
40	3	1	0	0.363655	0.439003	1.31832	0.438994	0.192894	0.539622	0.104186	0.650821	2.23115	0.4394	0.193072	0.798585	0.754718	0.861814	1.552	0.220883	0.190442	0.137621	0.102303	1.4792	3.72879	0.862188	0.743369	0.601218	0.383322	0.438707	0.909281	0.207846	0.0912699	0.254174	0.049012	0.733469	1.86984	0.439122	0.192828	0.572657	0.136662	0.18037	0.343874	0.405236	0.0730991	1.21428	0.0395118	0.201767	0.936717	0.180386
40	4	1	0	0.016223	0.0200925	0.0499241	0.214473	0.00415233	6.25863	0.00234595	0.026067	0.104371	0.0193606	0.000374835	0.614443	0.01061	0.0145289	0.0219585	0.270113	0.00370871	11.3334	0.00213657	0.0184931	0.0627991	0.0137302	0.000188519	0.734049	0.00710845	0.00883926	0.0359254	0.476719	0.00415717	31.1879	0.00237169	0.0121819	0.0570466	0.00872038	7.60451e-05	0.922982	0.00435254	0.00577551	0.0137258	0.368725	0.00203584	36.5885	0.00111539	0.00720229	0.034129	0.00552129
40	1	1	0	0.0867324	0.11123	0.39311	0.832878	0.0926886	4.22132	0.0522803	0.138952	0.590092	0.111287	0.0123848	0.991198	0.081989	0.114543	0.404879	0.827688	0.0949072	4.10568	0.0539822	0.120533	0.800437	0.114665	0.0131482	0.94732	0.0931478	0.1162	0.315818	0.707306	0.0822357	3.29322	0.0445171	0.154055	0.58945	0.116266	0.0135178	0.947498	0.0931957	0.124517	0.378136	0.755029	0.09406	3.3569	0.0520981	0.141936	0.874181	0.124578
40	2	1	0	0.305681	0.358074	0.99625	0.299594	0.107371	0.448156	0.0575621	0.592253	1.66919	0.358388	0.128442	0.655906	0.152442	0.201564	1.01477	0.609795	0.123055	1.6579	0.0675134	0.260298	1.55412	0.201797	0.0407222	0.885472	0.149824	0.188045	0.332208	0.262263	0.0493803	0.759858	0.026938	0.267797	0.802406	0.188285	0.0354514	0.648924	0.538428	0.637198	1.38493	0.15317	0.09772	0.127027	0.0517033	1.13773	2.46773	0.637985
40	3	1	0	0.356349	0.428113	1.01577	0.390426	0.167143	0.497391	0.0911582	0.664683	1.83322	0.428104	0.183273	0.77567	0.703481	0.818242	1.50085	0.199174	0.163027	0.132769	0.08895	1.36499	3.29784	0.818512	0.669961	0.570195	0.306834	0.353806	0.812546	0.210408	0.0744697	0.32107	0.0402192	0.587842	1.5648	0.35393	0.125266	0.601856	0.0874172	0.120739	0.449431	0.490486	0.0592937	2.21104	0.0323118	0.123765	0.938091	0.120888
40	4	1	0	0.00764431	0.0122261	0.0181661	0.318152	0.00384775	14.7038	0.00215066	0.0102251	0.0823079	0.012094	0.000146266	0.777831	0.00835427	0.0125246	0.016221	0.341297	0.00413857	15.9924	0.00235152	0.0120209	0.0722763	0.012126	0.00014704	0.8087	0.00760628	0.0114929	0.0556165	0.328744	0.00378115	16.1395	0.00213511	0.0104725	0.0784145	0.0115018	0.000132291	0.765507	0.0051376	0.00661488	0.0193518	0.395036	0.00260019	32.7433	0.0014186	0.00762558	0.0383894	0.00658217
40	1	1	0	0.0775027	0.101715	0.455803	0.804145	0.0818446	4.41817	0.0457672	0.118851	0.628792	0.101778	0.0103588	1.12641	0.0664886	0.0919973	0.391666	0.726809	0.066879	4.54796	0.0385084	0.0939222	0.753648	0.0920172	0.00846717	1.09818	0.0841734	0.107448	0.37763	0.625163	0.0672199	3.14517	0.0363624	0.134456	0.685635	0.107524	0.0115614	0.947381	0.0873185	0.117989	0.499761	0.67691	0.0799244	3.19905	0.0445983	0.133545	0.959069	0.118072
40	2	1	0	0.261863	0.310149	0.725325	0.280889	0.0871767	0.484011	0.0466215	0.507141	1.29941	0.31036	0.0963231	0.649738	0.118164	0.146355	0.540803	0.637165	0.0933706	2.43814	0.0523571	0.213736	0.90138	0.146541	0.0214742	0.932658	0.0785462	0.104856	0.243308	0.378897	0.0396871	1.96632	0.021573	0.129033	0.741857	0.104744	0.0109713	0.726132	0.528532	0.614571	1.1958	0.140109	0.0860269	0.121027	0.0456265	1.13391	2.16204	0.613999
40	3	1	0	0.402018	0.486455	1.29125	0.437847	0.213107	0.485288	0.114961	0.732574	2.33837	0.486716	0.236893	0.878906	0.845981	0.972267	1.79532	0.212778	0.207082	0.117885	0.111658	1.60293	4.08032	0.973229	0.947174	0.597166	0.386874	0.440157	0.851848	0.227959	0.100437	0.28033	0.0544182	0.75346	1.77782	0.440593	0.194122	0.626032	0.0997326	0.125178	0.320847	0.507418	0.0631221	2.26859	0.0351066	0.175098	0.733248	0.124399
40	4	1	0	0.0150332	0.0234708	0.0630095	0.185302	0.00434614	4.40498	0.00242323	0.0172278	0.154274	0.0234544	0.000550111	0.564195	0.0106282	0.015248	0.0186284	0.278543	0.00402284	10.9906	0.00229246	0.0163517	0.0752456	0.0144424	0.000208584	0.814589	0.00755756	0.0120901	0.053909	0.370729	0.00441949	17.4667	0.00248223	0.00839671	0.0746947	0.0119211	0.000142112	0.846703	0.00507824	0.0063117	0.0147474	0.473875	0.00295609	41.1127	0.00159986	0.00885539	0.03358	0.00623811
41	1	1	0	0.143424	0.177922	0.533191	0.741904	0.132171	2.22201	0.0705218	0.239757	0.819263	0.178151	0.0317379	0.825657	0.100085	0.132855	0.369103	0.775102	0.103111	3.21472	0.0568894	0.138462	0.808425	0.133028	0.0176965	0.919688	0.202826	0.261206	0.597803	0.525314	0.137394	1.05846	0.0724061	0.304484	1.36275	0.261547	0.0684068	0.687992	0.120214	0.148676	0.374798	0.548812	0.081684	1.97965	0.0438546	0.199919	0.743043	0.148838
41	2	1	0	0.168313	0.227696	1.10965	0.293947	0.0669759	0.698289	0.0362522	0.258036	1.65032	0.22785	0.0519158	0.605166	0.184341	0.270759	0.500865	0.33702	0.0908552	0.688194	0.0500147	0.224711	2.01712	0.269584	0.0726753	0.682318	0.110306	0.155289	0.763373	0.304996	0.0473462	1.07777	0.0259722	0.173681	1.1989	0.155236	0.0240981	0.661306	0.231215	0.288362	0.728408	0.160927	0.0460617	0.300305	0.0246029	0.382283	1.27409	0.286228
41	3	1	0	0.582722	0.670538	1.93541	0.350812	0.235463	0.279808	0.126054	1.16155	2.89044	0.671193	0.4505	0.732231	0.777156	1.00421	2.8543	0.233309	0.234527	0.124843	0.12615	1.31993	5.13582	1.00522	1.01047	0.576636	0.193131	0.276059	0.842996	0.28798	0.0795803	0.576836	0.0440494	0.189763	1.74402	0.27634	0.0763637	0.64103	0.210718	0.283367	0.674078	0.233898	0.0663464	0.450002	0.0362072	0.330558	1.56656	0.283655
41	4	1	0	0.017077	0.0220906	0.0523677	0.397794	0.00874196	10.6542	0.00514544	0.0280046	0.129972	0.0219761	0.000482949	0.955593	0.0236211	0.0342348	0.149717	0.438808	0.0149892	7.79049	0.00909023	0.0346132	0.232886	0.034159	0.00116684	0.945003	0.0101189	0.0153886	0.0752912	0.489073	0.00751238	18.9924	0.00448114	0.0129975	0.11026	0.0153604	0.000235943	1.03206	0.00615818	0.00817023	0.02518	0.500879	0.00409153	34.5986	0.00230869	0.00959946	0.0508	0.00816871
41	1	1	0	0.150914	0.223085	1.39359	0.571785	0.1277	1.3624	0.0679548	0.223092	1.69532	0.223336	0.0498789	0.771376	0.134376	0.19055	0.325512	0.579415	0.110442	1.67334	0.0607956	0.202229	1.40302	0.190609	0.0363319	0.854583	0.188756	0.260068	0.466971	0.494355	0.128723	1.02039	0.069183	0.266048	1.84955	0.260386	0.0678008	0.756652	0.159321	0.194523	0.55496	0.447052	0.0870123	1.24586	0.047197	0.278964	0.944959	0.194636
41	2	1	0	0.267326	0.320979	0.85887	0.335804	0.107847	0.550567	0.0567873	0.472436	1.51713	0.321159	0.103143	0.642593	0.32026	0.419666	0.58053	0.307746	0.129309	0.39933	0.0705026	0.441876	1.92775	0.420181	0.176552	0.658594	0.223148	0.277038	0.770832	0.253929	0.0704238	0.497279	0.0382487	0.385841	1.30982	0.277337	0.0769159	0.577301	0.448531	0.519485	1.00779	0.145515	0.0754435	0.14853	0.039925	0.933979	1.82848	0.51846
41	3	1	0	0.672418	0.764086	1.64177	0.372434	0.284912	0.258049	0.151017	1.44544	2.8133	0.765	0.585226	0.740247	1.00111	1.22775	2.72803	0.235561	0.289428	0.102688	0.155022	1.88959	5.08414	1.22868	1.50964	0.62275	0.32393	0.435327	1.06051	0.259813	0.113162	0.320326	0.0607673	0.446855	2.22172	0.435551	0.189705	0.58562	0.247644	0.343081	0.780734	0.228031	0.0783195	0.349248	0.0411991	0.340722	1.92666	0.34346
41	4	1	0	0.0231206	0.0342005	0.103862	0.252747	0.00860136	4.41603	0.0051144	0.030331	0.258473	0.0340315	0.00115814	0.719837	0.0136451	0.0186307	0.0640307	0.775887	0.0144499	25.0506	0.00868856	0.0192911	0.12521	0.0186237	0.000346841	1.10746	0.010577	0.0144179	0.0761137	0.623895	0.00892423	26.2182	0.00536441	0.0160172	0.106637	0.0143041	0.000204606	1.10229	0.00645448	0.00847294	0.0275337	0.520976	0.00440454	34.4925	0.00246543	0.0101212	0.0475502	0.00845442
41	1	1	0	0.202241	0.25768	1.08259	0.77462	0.199764	1.62461	0.108045	0.3386	1.54497	0.257886	0.0665053	0.88565	0.189813	0.25517	0.58044	0.804305	0.205419	1.76308	0.115004	0.284376	1.41114	0.2554	0.0652291	0.986662	0.23859	0.319478	0.599575	0.634163	0.202763	1.05996	0.108359	0.303317	1.78959	0.319733	0.102229	0.833403	0.206962	0.240897	0.47566	0.484307	0.116774	1.08069	0.0628278	0.434015	0.942715	0.241116
41	2	1	0	0.27907	0.314468	0.59964	0.247052	0.077775	0.41092	0.0407249	0.558386	1.17562	0.314812	0.0991066	0.519679	0.131055	0.173936	0.629941	0.630236	0.109738	2.10493	0.0638185	0.193435	1.18974	0.174122	0.0303186	0.909716	0.40248	0.461032	0.850276	0.137898	0.0636356	0.157885	0.0336219	0.872118	1.60168	0.461467	0.212952	0.411897	0.357666	0.429589	1.1832	0.145743	0.0626824	0.17878	0.0330701	0.719329	1.99082	0.430089
41	3	1	0	0.643441	0.745921	1.9419	0.438059	0.327023	0.313473	0.174699	1.29872	3.10681	0.746526	0.557301	0.814138	1.02897	1.2453	2.76154	0.274637	0.342214	0.118029	0.18326	2.00174	5.39331	1.24606	1.55266	0.642867	0.345735	0.452882	1.00113	0.294604	0.133478	0.347296	0.0712922	0.478616	2.2643	0.453076	0.205278	0.643141	0.267973	0.347598	0.702974	0.259784	0.0903705	0.398044	0.0481681	0.422833	1.7897	0.347868
41	4	1	0	0.0206733	0.02994	0.103224	0.340816	0.00972949	6.93331	0.00565043	0.0260569	0.153381	0.0285476	0.000814968	0.934011	0.0112971	0.0156077	0.0819726	0.9437	0.0146356	36.3288	0.00873781	0.0169336	0.124175	0.0155087	0.00024052	1.06143	0.00955149	0.0123325	0.0566809	0.83773	0.0103404	39.6989	0.00604841	0.0157683	0.0883064	0.0123433	0.000152357	1.11011	0.00598216	0.00785597	0.0228184	0.634025	0.00496569	45.876	0.00281405	0.00856391	0.0503703	0.00783201
41	1	1	0	0.219118	0.287944	1.18025	0.651566	0.187783	1.23197	0.102328	0.332088	1.60857	0.288202	0.0830605	0.836669	0.214468	0.286995	0.615062	0.658903	0.189303	1.2435	0.10264	0.307815	1.57035	0.2873	0.0825411	0.775488	0.234579	0.322375	0.532639	0.563214	0.181743	0.933458	0.0971996	0.297174	1.72496	0.32269	0.104129	0.793514	0.225322	0.268576	0.670732	0.427491	0.114938	0.847761	0.0612842	0.431863	1.11179	0.268867
41	2	1	0	0.306315	0.351831	0.659522	0.269457	0.094872	0.403673	0.0500411	0.626041	1.33203	0.352086	0.123965	0.613762	0.215735	0.280233	0.453633	0.37224	0.104412	0.739566	0.0581873	0.309528	1.68142	0.280495	0.0786777	0.830298	0.375466	0.447049	0.989265	0.177134	0.0792043	0.208775	0.041742	0.661687	1.84875	0.447144	0.199938	0.543591	0.478486	0.563331	1.24521	0.137597	0.0775911	0.125264	0.0398318	0.967214	2.02555	0.5639
41	3	1	0	0.620224	0.72485	2.08182	0.43294	0.314069	0.320557	0.168694	1.23345	3.28896	0.725433	0.526253	0.850722	0.949248	1.15652	2.47455	0.283487	0.328084	0.131576	0.176231	1.7857	5.4132	1.15732	1.33938	0.703423	0.338034	0.436889	1.07812	0.284619	0.124428	0.351554	0.0671893	0.527148	2.41672	0.437173	0.191121	0.66235	0.357374	0.462955	0.958189	0.231245	0.107139	0.267241	0.0573661	0.626035	2.24875	0.463315
41	4	1	0	0.0166183	0.0218491	0.0677249	0.549755	0.0114669	15.5268	0.00675521	0.0266707	0.102117	0.0208583	0.000435068	1.06144	0.0166204	0.0223071	0.0840352	0.818283	0.0182299	21.4607	0.0106514	0.024492	0.163794	0.0222782	0.00049632	0.9961	0.0120388	0.0156751	0.0495689	0.842743	0.0130124	31.6766	0.00755198	0.0183415	0.0952835	0.0154405	0.000238409	1.05439	0.00732278	0.00951124	0.0332272	0.743889	0.00708078	43.5641	0.00394708	0.0122954	0.0664846	0.0095186
41	1	1	0	0.238718	0.307792	1.35241	0.722368	0.222468	1.29197	0.122538	0.39079	1.83501	0.307971	0.0948458	0.946963	0.187193	0.25454	0.66605	0.698965	0.178058	1.50863	0.0979029	0.26503	1.5346	0.254745	0.0648952	0.938212	0.271806	0.366103	0.679026	0.648007	0.237426	0.968686	0.13004	0.378368	2.09532	0.366394	0.134244	0.905567	0.269722	0.327108	0.824132	0.480201	0.15721	0.796281	0.085346	0.48382	1.56692	0.327385
41	2	1	0	0.305517	0.344862	0.647593	0.24612	0.0849226	0.370846	0.0441516	0.605956	1.30774	0.345045	0.119056	0.557298	0.203852	0.254464	0.573331	0.42711	0.108786	0.950584	0.0616677	0.323652	1.30548	0.254703	0.0648735	0.850001	0.388733	0.454968	0.938962	0.173837	0.0791621	0.201962	0.0418813	0.780741	1.74232	0.455382	0.207373	0.539247	0.445231	0.524481	1.15101	0.1538	0.0806745	0.155658	0.0428285	0.924936	1.97693	0.524542
41	3	1	0	0.481962	0.576714	1.27199	0.447139	0.257962	0.430734	0.143362	0.923395	2.31646	0.576917	0.332833	0.941911	0.854	1.01829	2.00067	0.269954	0.275109	0.147347	0.153027	1.64099	4.0475	1.01909	1.03855	0.706384	0.220159	0.295054	0.85982	0.322105	0.0951208	0.59846	0.0521905	0.316629	1.7033	0.29531	0.0872081	0.715245	0.233023	0.322107	0.724756	0.24243	0.0781554	0.410787	0.0426937	0.318207	1.6431	0.322384
41	4	1	0	0.0200782	0.0274077	0.103819	0.510003	0.0138478	10.9996	0.00810954	0.0284786	0.192033	0.0271525	0.000737256	1.05277	0.0208188	0.0278184	0.112366	0.968994	0.0268342	20.8951	0.0160243	0.0315043	0.184673	0.0276929	0.000766895	1.00904	0.0133053	0.0184345	0.0865613	0.852881	0.0155357	27.1233	0.00899966	0.0193398	0.123957	0.0182155	0.000331806	1.11019	0.00779056	0.00958768	0.024995	0.826999	0.00791559	48.9577	0.00448515	0.0132479	0.054662	0.00957146
42	1	0	0	0.0896277	0.111569	0.38939	0.550557	0.0614932	2.66148	0.0332027	0.15288	0.557963	0.111693	0.0124753	0.838471	0.0800289	0.101386	0.385985	0.58694	0.0595763	3.21657	0.03314	0.129831	0.63364	0.101503	0.0103029	0.940579	0.0691791	0.0886227	0.209784	0.497159	0.0441037	3.11178	0.0244889	0.107987	0.529398	0.0887115	0.00786974	0.868146	0.139026	0.174239	0.597981	0.381974	0.066616	1.18137	0.0359316	0.225726	1.00324	0.174399
42	2	0	0	0.341117	0.392072	0.743174	0.243117	0.0953963	0.316285	0.0486981	0.676327	1.48607	0.392389	0.153969	0.521656	0.126135	0.160946	0.412788	0.369481	0.0595052	1.31293	0.0340539	0.212928	0.890779	0.161051	0.0259374	0.926691	0.145551	0.180202	0.454766	0.249379	0.0449768	0.768402	0.0249945	0.259502	0.893118	0.180355	0.0325279	0.720965	0.657413	0.771992	1.5085	0.130926	0.101169	0.085945	0.051318	1.33476	2.9085	0.772724
42	3	0	0	0.569157	0.682674	2.06311	0.423187	0.289064	0.333461	0.155585	1.09029	3.30351	0.683064	0.466577	0.807697	1.03885	1.23944	2.72645	0.239816	0.297465	0.104311	0.160488	2.0369	5.60871	1.24039	1.53856	0.640804	0.163058	0.196521	0.541217	0.331832	0.0652497	0.894802	0.0345978	0.286235	0.978421	0.196635	0.0386653	0.728532	0.273866	0.358232	0.897101	0.228789	0.0819744	0.339164	0.0435407	0.4395	2.1902	0.358296
42	4	0	0	0.0137592	0.0198521	0.0760901	0.275126	0.00517518	8.51744	0.00301367	0.01863	0.0992063	0.0188102	0.000353824	0.714717	0.00961587	0.0133966	0.0466308	0.769793	0.0101605	35.2395	0.00613926	0.0141036	0.105426	0.0131991	0.000174215	1.02382	0.00485739	0.00605133	0.0181301	0.698708	0.0042331	67.2777	0.00246943	0.00833983	0.0323596	0.00605847	3.6705e-05	1.053	0.00506776	0.00644222	0.0232445	0.671198	0.00423429	59.6362	0.00237339	0.00907023	0.0425932	0.00630855
42	1	0	0	0.136237	0.160862	0.480535	0.541927	0.0872756	1.84309	0.0478025	0.264249	0.755033	0.161047	0.0259361	0.82063	0.126959	0.166354	0.53514	0.540861	0.0900947	1.80217	0.0500061	0.206955	0.887079	0.166576	0.0277477	0.806329	0.117225	0.146952	0.32476	0.353145	0.0519647	1.31052	0.0283763	0.199251	0.691592	0.147149	0.0216527	0.73226	0.185253	0.230573	0.657357	0.347879	0.0803186	0.806978	0.0430168	0.309184	1.14652	0.230881
42	2	0	0	0.37228	0.424174	0.81026	0.257293	0.10925	0.309699	0.0558374	0.779013	1.51867	0.424613	0.180296	0.483693	0.0974428	0.1186	0.241151	0.634852	0.0752282	3.05671	0.0429211	0.172785	0.635586	0.118497	0.0140416	1.06993	0.2409	0.289162	0.631225	0.189805	0.0549467	0.355163	0.0297644	0.432124	1.20162	0.289491	0.0838049	0.558695	0.719805	0.828687	1.57086	0.133781	0.110987	0.0816286	0.0561817	1.46836	3.08866	0.829614
42	3	0	0	0.501284	0.613063	2.2316	0.493062	0.302094	0.445738	0.167325	0.923001	3.31967	0.61269	0.375389	0.88768	0.962197	1.1364	2.47868	0.277962	0.316212	0.135147	0.1749	1.81807	5.51118	1.13761	1.29415	0.678937	0.158617	0.193148	0.453898	0.361346	0.0698135	1.00989	0.0376969	0.279712	0.810014	0.193204	0.0373279	0.771821	0.250606	0.319048	0.564724	0.244352	0.0779703	0.409947	0.0417403	0.378042	1.50473	0.31909
42	4	0	0	0.0136148	0.0209076	0.0646869	0.192049	0.00389501	5.4635	0.00224733	0.0146568	0.113861	0.0202814	0.000411334	0.564482	0.0110251	0.0161794	0.0684731	0.649736	0.0104434	24.6796	0.00637604	0.0140979	0.10474	0.0160734	0.000258353	1.05805	0.00367181	0.00476448	0.0164807	0.683139	0.00325817	82.9169	0.00188613	0.00589995	0.0303282	0.0047694	2.27472e-05	1.06125	0.00388351	0.00520771	0.0243854	0.682657	0.00354716	74.9813	0.00202447	0.00600698	0.0404718	0.00519612
42	1	0	0	0.127018	0.157288	0.489639	0.497366	0.0782957	1.70746	0.042313	0.239076	0.744362	0.157421	0.0247813	0.794224	0.113713	0.146667	0.496849	0.504528	0.0740749	1.89114	0.0407658	0.176822	0.859566	0.14682	0.0215562	0.842852	0.103572	0.129835	0.396214	0.395835	0.0513886	1.65915	0.0279634	0.180851	0.686611	0.129823	0.0168541	0.802248	0.196875	0.244109	0.716366	0.306823	0.0749134	0.662664	0.0395036	0.315027	1.23379	0.244158
42	2	0	0	0.37607	0.436592	1.0064	0.250203	0.109298	0.291378	0.0556029	0.773744	1.77925	0.436838	0.190828	0.498421	0.119829	0.159079	0.47869	0.474981	0.0756022	1.71861	0.0435405	0.173208	0.924042	0.159169	0.0253347	0.985346	0.137533	0.167044	0.387678	0.261831	0.043777	0.833908	0.0233114	0.256736	0.792962	0.167196	0.0279544	0.68975	0.739072	0.862976	1.53299	0.134201	0.115899	0.0786322	0.0586482	1.47145	3.40665	0.863629
42	3	0	0	0.64233	0.74333	2.39121	0.386707	0.287513	0.276608	0.152903	1.31401	3.58824	0.74349	0.552778	0.808857	1.07207	1.3034	2.65909	0.227526	0.29678	0.092634	0.157608	2.02984	5.76493	1.30438	1.70141	0.585347	0.162161	0.209893	0.666277	0.33771	0.0709295	0.854697	0.0377033	0.265693	1.10667	0.210031	0.044113	0.710081	0.231771	0.305105	0.725078	0.228049	0.0695805	0.390113	0.0363171	0.345274	1.72187	0.305113
42	4	0	0	0.0184261	0.0291024	0.099119	0.231599	0.00633052	5.11344	0.00382048	0.016135	0.134958	0.0273339	0.000747144	0.644144	0.0104187	0.0144393	0.0519765	0.900212	0.0129681	38.5617	0.00800242	0.0154637	0.0973931	0.0144056	0.000207522	0.945541	0.00434362	0.00591819	0.0264244	0.851938	0.00504803	86.3702	0.00303244	0.00709612	0.0490898	0.00592535	3.51098e-05	1.13662	0.00478904	0.00701881	0.0536619	0.74199	0.00521285	62.573	0.00308845	0.00687664	0.0776834	0.0070255
42	1	0	0	0.182758	0.223428	0.675343	0.449748	0.100462	1.0939	0.0545812	0.312987	1.14479	0.223374	0.0498962	0.701335	0.164174	0.209125	0.765746	0.429133	0.0898224	1.1569	0.0506852	0.251061	1.29439	0.209311	0.0438112	0.756854	0.152417	0.193132	0.547637	0.346837	0.0670499	0.998404	0.0373122	0.275378	0.968046	0.193318	0.0373719	0.704158	0.261135	0.325787	1.084	0.269467	0.0878074	0.443553	0.0470974	0.43035	1.88329	0.325856
42	2	0	0	0.381305	0.435414	0.775318	0.24508	0.106687	0.289855	0.0549276	0.782542	1.50646	0.435316	0.1895	0.478417	0.169405	0.233323	0.733283	0.490376	0.11461	1.22416	0.0668691	0.247407	1.52975	0.233719	0.0546244	0.762624	0.150573	0.185773	0.427071	0.256009	0.0475939	0.754728	0.0260844	0.278664	0.911223	0.185907	0.0345614	0.624019	0.75819	0.878676	1.49212	0.125842	0.110692	0.0726252	0.0561907	1.49279	2.95641	0.879607
42	3	0	0	0.608932	0.710863	1.73056	0.36991	0.26321	0.283049	0.143309	1.22339	2.95572	0.711552	0.506306	0.801136	0.986719	1.21842	2.7335	0.226647	0.276428	0.103001	0.153217	1.8375	5.45156	1.21964	1.48753	0.616805	0.187073	0.260939	0.960555	0.299932	0.0783429	0.610007	0.0416187	0.250659	1.60814	0.261202	0.0682267	0.616933	0.241191	0.30831	0.624269	0.225013	0.0694435	0.391456	0.0372849	0.406058	1.39457	0.308621
42	4	0	0	0.016149	0.0226098	0.05886	0.229159	0.00487878	6.40453	0.00290291	0.0236109	0.0900963	0.0212899	0.000453259	0.661661	0.013519	0.0196369	0.0832537	0.660444	0.0127291	21.3714	0.00793889	0.017825	0.125088	0.0192736	0.000371472	0.999781	0.00295024	0.00377675	0.0127645	1.00805	0.00379338	160.9	0.00227848	0.00462201	0.0224934	0.00376309	1.41608e-05	0.906632	0.00418075	0.00659583	0.0398256	0.508475	0.00335747	44.6999	0.00194891	0.00623776	0.0567434	0.00660302
42	1	0	0	0.17004	0.206603	0.585595	0.4851	0.100275	1.28125	0.0547466	0.315751	0.998867	0.20671	0.0427292	0.808831	0.164869	0.211576	0.600192	0.52342	0.110812	1.37441	0.0616007	0.252933	1.20292	0.211707	0.0448198	0.81657	0.175626	0.227019	0.77225	0.401943	0.0913416	0.990733	0.0511641	0.304717	1.39395	0.22725	0.0516426	0.727652	0.211048	0.255896	0.750034	0.312698	0.0800999	0.660586	0.0433454	0.393683	1.40178	0.256157
42	2	0	0	0.404408	0.468723	1.08713	0.252984	0.118667	0.27496	0.0604985	0.787353	1.84813	0.46907	0.220026	0.505526	0.140106	0.179097	0.482396	0.544036	0.0974678	1.69893	0.0545308	0.209236	0.987388	0.179157	0.0320972	0.966181	0.176897	0.21761	0.704786	0.24548	0.0534723	0.618763	0.0293595	0.333208	1.17009	0.217827	0.0474486	0.658067	0.761168	0.89328	1.69254	0.137834	0.123246	0.0783324	0.0626283	1.56918	3.55589	0.894159
42	3	0	0	0.509642	0.599982	1.59207	0.392971	0.23587	0.357336	0.128737	1.01529	2.63816	0.600224	0.360269	0.850681	0.924409	1.09557	2.13672	0.220043	0.241264	0.110038	0.132286	1.86724	4.35267	1.09644	1.20219	0.640687	0.156326	0.231558	1.11921	0.281147	0.0651499	0.648913	0.0348454	0.19168	1.64878	0.231729	0.0536981	0.629611	0.221603	0.277125	0.788919	0.227477	0.0630152	0.443841	0.0340598	0.379749	1.53853	0.277018
42	4	0	0	0.00714562	0.0119469	0.0565508	0.33724	0.00391645	17.2938	0.00233236	0.00750304	0.0789978	0.0116132	0.000134867	0.81985	0.0114718	0.0210384	0.169795	0.474182	0.00986678	13.7225	0.00594148	0.0119861	0.239933	0.020808	0.000432972	0.9334	0.00312166	0.00429418	0.019246	0.803355	0.00344816	109.812	0.00202306	0.00469525	0.0370614	0.0042922	1.8423e-05	1.14859	0.00428731	0.00652631	0.0598887	0.587768	0.00383863	50.7948	0.0021665	0.00640216	0.0796827	0.00653085
[truncated: 362 more columns]
