# Supplementary material for: On the Use of t-Distributed Stochastic Neighbor Embedding for Data Visualization and Classification of Individuals with Parkinson's Disease
Source: Comput Math Methods Med. 2018 Nov 4;2018:8019232. doi: 10.1155/2018/8019232 (PMC6247646; doi:10.1155/2018/8019232)
Supplement: Supplementary Materials — The attached supplementary material file includes three tables containing features estimated from signals of the executed tasks. Each table includes features extracted from filtered signals, instantaneous frequency, and instantaneous amplitude, respectively. [file 8019232.f1.zip › 8019232.f1/FeatMatrix_IA.xlsx]

## Sheet: Planilha1
Subject	Activity	Pathological	DBSuser	Gyro1MAV	Gyro1RMS	Gyro1PEAK	Gyro1MAVSDN	Gyro1MAVSD	Gyro1MAVFDN	Gyro1MAVFD	Gyro1INTERQRANGE	Gyro1RANGE	Gyro1STD	Gyro1VAR	Gyro1APPENTROPY	Gyro1XMAV	Gyro1XRMS	Gyro1XPEAK	Gyro1XMAVSDN	Gyro1XMAVSD	Gyro1XMAVFDN	Gyro1XMAVFD	Gyro1XINTERQRANGE	Gyro1XRANGE	Gyro1XSTD	Gyro1XVAR	Gyro1XAPPENTROPY	Gyro1YMAV	Gyro1YRMS	Gyro1YPEAK	Gyro1YMAVSDN	Gyro1YMAVSD	Gyro1YMAVFDN	Gyro1YMAVFD	Gyro1YINTERQRANGE	Gyro1YRANGE	Gyro1YSTD	Gyro1YVAR	Gyro1YAPPENTROPY	Gyro1ZMAV	Gyro1ZRMS	Gyro1ZPEAK	Gyro1ZMAVSDN	Gyro1ZMAVSD	Gyro1ZMAVFDN	Gyro1ZMAVFD	Gyro1ZINTERQRANGE	Gyro1ZRANGE	Gyro1ZSTD
4	1	1	1	0.113892	0.12608	0.268383	0.989178	0.0535504	10.5533	0.0309288	0.083163	0.263128	0.0541362	0.00293073	1.07285	0.249038	0.274288	0.520143	0.832011	0.0957419	3.90808	0.0517498	0.180561	0.50636	0.115073	0.0132418	0.872604	0.21024	0.228298	0.4077	0.821309	0.0731637	4.99066	0.0396038	0.140396	0.39382	0.0890818	0.00793558	0.836337	0.0887594	0.0998552	0.22838	0.489601	0.0224214	5.73964	0.0120373	0.0596784	0.228025	0.0457953
4	2	1	1	0.652896	0.705499	1.68877	0.47116	0.126107	0.961612	0.0688878	0.31758	1.65381	0.267652	0.0716378	0.751289	0.391615	0.491766	1.61485	0.504377	0.150214	0.906544	0.080408	0.263766	1.58436	0.297821	0.0886973	0.702036	1.03453	1.06904	2.05986	0.66409	0.179169	1.32671	0.0965716	0.332451	1.59969	0.269797	0.0727904	0.823595	0.902466	0.935417	1.96454	0.459305	0.113173	0.98837	0.0600075	0.316995	1.46446	0.246401
4	3	1	1	1.93705	2.23697	5.85503	0.616402	0.69045	0.3089	0.387575	1.15894	5.73297	1.12013	1.25469	0.861262	3.62345	3.91225	7.74526	0.651225	0.961791	0.230171	0.502055	1.84652	7.49096	1.4769	2.18122	0.675115	0.852547	0.948872	2.13856	0.425314	0.177366	0.541157	0.0941117	0.598026	2.0422	0.417023	0.173908	0.792718	1.07566	1.21204	2.91611	0.541909	0.303033	0.510252	0.159555	0.659681	2.87058	0.559195
4	4	1	1	0.69207	0.774663	1.54849	0.764897	0.266544	1.30254	0.158169	0.55589	1.49672	0.34847	0.121431	1.02392	1.77731	2.00036	3.39727	0.23834	0.219042	0.135564	0.114499	1.79424	3.3145	0.919029	0.844614	0.562203	0.578116	0.679637	1.34478	0.243316	0.0870498	0.351673	0.0450124	0.561109	1.32659	0.357764	0.127995	0.600857	0.154775	0.174133	0.403544	0.512339	0.0409312	3.43187	0.0219041	0.1136	0.398334	0.0798909
4	1	1	1	0.167396	0.185902	0.417087	0.914794	0.0740353	6.5865	0.0431406	0.115969	0.404572	0.0809312	0.00654986	1.09878	0.309498	0.337863	0.683406	0.788902	0.107001	3.15155	0.0579767	0.191792	0.679787	0.135633	0.0183962	0.802443	0.306689	0.339204	0.687933	0.849429	0.12321	3.12134	0.065672	0.235039	0.677527	0.145051	0.0210397	0.759582	0.124677	0.132513	0.255296	0.597234	0.0268361	7.10164	0.0143386	0.058343	0.240761	0.044934
4	2	1	1	0.67864	0.732452	1.67926	0.54685	0.150898	1.07823	0.0820998	0.36922	1.57688	0.275941	0.0761434	0.763465	0.41195	0.523499	1.89485	0.455238	0.147258	0.749426	0.078417	0.381096	1.88902	0.323475	0.104636	0.682757	1.06586	1.11969	2.67805	0.591275	0.203092	0.921165	0.108679	0.34123	2.22926	0.343482	0.11798	0.770053	0.939072	0.973134	2.25985	0.429969	0.109884	0.895362	0.058478	0.299754	1.75081	0.255562
4	3	1	1	2.05983	2.35851	6.46504	0.635498	0.730856	0.303355	0.401224	1.28396	6.23774	1.15005	1.32262	0.863689	3.79475	4.14008	8.33501	0.682585	1.13117	0.21978	0.603572	2.22642	8.18611	1.65718	2.74626	0.729296	0.959564	1.06701	2.27359	0.49523	0.231345	0.56703	0.123741	0.656156	2.27211	0.467147	0.218226	0.801555	1.04538	1.16115	2.4164	0.60679	0.307022	0.629751	0.161225	0.718532	2.37031	0.505977
4	4	1	1	0.322144	0.381164	0.98393	0.700991	0.14302	2.0943	0.0871777	0.311007	0.972602	0.204025	0.0416262	0.882187	0.867427	1.02368	2.12018	0.224567	0.122246	0.218249	0.0646737	0.947609	2.06731	0.544362	0.29633	0.545267	0.402319	0.461684	1.11165	0.377458	0.0856055	0.865706	0.0445283	0.325983	1.08142	0.226795	0.0514359	0.65751	0.119989	0.137086	0.352373	0.546269	0.0362667	4.54176	0.0200183	0.0758574	0.344227	0.0663899
4	1	1	1	0.201011	0.218618	0.51524	0.870364	0.0748876	5.8193	0.0430813	0.109898	0.496834	0.0860418	0.00740319	1.02875	0.383767	0.411868	0.881236	0.712276	0.106612	2.57154	0.0576112	0.179487	0.876254	0.149678	0.0224034	0.817098	0.349628	0.384373	0.726774	0.832696	0.133111	2.78362	0.0711315	0.260497	0.702639	0.159855	0.0255536	0.750434	0.17099	0.183424	0.423281	0.458727	0.0304826	3.66576	0.0161867	0.0878644	0.419669	0.0664504
4	2	1	1	0.595547	0.62718	1.11103	0.479008	0.0943028	1.36434	0.0528795	0.292808	0.990967	0.196871	0.0387583	0.919457	0.387595	0.448663	1.38139	0.473286	0.107064	1.10986	0.0567943	0.256631	1.36185	0.226214	0.0511727	0.736842	0.547575	0.578832	1.17916	0.785991	0.147634	2.27132	0.0801338	0.242274	1.11923	0.187831	0.0352807	0.793667	1.19812	1.22313	2.01725	0.378227	0.0931595	0.808334	0.0490388	0.328072	1.28963	0.246306
4	3	1	1	1.79954	2.06252	6.03783	0.645523	0.651242	0.358927	0.365315	0.871761	5.92994	1.00886	1.0178	0.909328	3.72762	3.99017	8.16652	0.609366	0.868351	0.225496	0.457903	1.70041	7.7597	1.42501	2.03065	0.732924	0.99909	1.11088	2.53624	0.389802	0.189514	0.427345	0.101012	0.675382	2.44075	0.48618	0.236371	0.72987	0.848535	0.933234	2.18795	0.550334	0.21402	0.739401	0.111824	0.385962	2.14439	0.38889
4	4	1	1	0.149824	0.171082	0.510736	0.878299	0.0726384	6.39855	0.0437652	0.11414	0.508563	0.0827035	0.00683987	0.963606	0.314329	0.342712	0.735711	0.574647	0.0785795	2.2016	0.0411675	0.201968	0.717176	0.136744	0.0186989	0.740788	0.28483	0.326576	0.723607	0.384584	0.0615236	1.27109	0.0325294	0.2683	0.722021	0.159974	0.0255918	0.665617	0.0778817	0.0879601	0.241042	0.486003	0.0198957	6.41791	0.0107556	0.0468779	0.232657	0.0409375
4	1	1	1	0.167386	0.192612	0.487113	0.901414	0.0860062	5.58948	0.0508841	0.133034	0.484358	0.0954125	0.00910355	1.01391	0.275489	0.307182	0.642914	0.721249	0.0981304	2.83208	0.0524254	0.196129	0.622299	0.136056	0.0185113	0.795806	0.292548	0.32723	0.655349	0.727637	0.106811	2.68837	0.0579283	0.237689	0.653544	0.146791	0.0215477	0.679122	0.176084	0.18954	0.358264	0.470923	0.0330717	3.52786	0.017399	0.0941099	0.345607	0.0702274
4	2	1	1	0.677751	0.748782	2.30192	0.385497	0.122845	0.654645	0.0664782	0.436999	2.23807	0.318667	0.101548	0.775105	0.462849	0.598987	2.53019	0.411463	0.15661	0.577766	0.0837012	0.365109	2.50602	0.380619	0.14487	0.685729	0.790302	0.859608	2.39009	0.47437	0.160585	0.747073	0.0856125	0.355612	2.34409	0.338522	0.114597	0.757197	1.03339	1.10097	2.21249	0.250874	0.0953809	0.348783	0.0504157	0.373272	2.20671	0.380194
4	3	1	1	2.07909	2.29602	5.16195	0.626565	0.611086	0.343623	0.326854	1.21734	5.05945	0.975295	0.951201	0.791991	3.74478	4.02946	7.20517	0.75122	1.11881	0.268478	0.595503	2.00585	7.13291	1.48932	2.21807	0.718191	0.654447	0.711749	1.30222	0.671014	0.187957	1.29571	0.101662	0.442797	1.26343	0.280108	0.0784608	0.898365	1.02344	1.11561	2.5933	0.619786	0.275512	0.743193	0.146858	0.575563	2.56849	0.444527
4	4	1	1	0.24387	0.267761	0.508427	0.986359	0.109206	5.21993	0.0639868	0.171497	0.49088	0.110717	0.0122582	0.94778	0.727824	0.775389	1.32567	0.354057	0.0948094	0.690714	0.0495284	0.429113	1.16871	0.26778	0.071706	0.666062	0.217163	0.25098	0.589488	0.37123	0.0467757	1.53184	0.0243203	0.155317	0.580495	0.126002	0.0158765	0.636735	0.119635	0.126242	0.245824	0.414611	0.0167349	5.31549	0.0086598	0.043299	0.215361	0.0403629
4	1	1	1	0.189065	0.218798	0.529841	0.816578	0.0900316	4.3514	0.0528961	0.128497	0.522418	0.110255	0.0121561	1.06068	0.348269	0.392152	0.831082	0.769918	0.138946	2.26877	0.0738915	0.270112	0.803994	0.180469	0.032569	0.713701	0.378349	0.414617	0.691914	0.82776	0.140543	2.66177	0.0767322	0.27331	0.689763	0.169787	0.0288275	0.643162	0.23714	0.252941	0.43118	0.431279	0.0379964	2.54678	0.0197679	0.12701	0.411237	0.0881017
4	2	1	1	0.649371	0.711171	1.6102	0.47362	0.1375	0.883523	0.074467	0.395728	1.53071	0.290317	0.0842842	0.82329	0.477075	0.572032	1.59177	0.526681	0.166434	0.892707	0.0891455	0.37473	1.57444	0.316006	0.0998598	0.76531	0.947332	0.98112	1.87776	0.711646	0.181874	1.51188	0.0987487	0.279434	1.70084	0.255568	0.065315	0.740246	1.07435	1.12167	2.51661	0.373283	0.120473	0.613114	0.0638618	0.365713	1.90061	0.322738
4	3	1	1	1.9745	2.22862	5.87997	0.719076	0.744101	0.387874	0.415341	1.27479	5.72531	1.0348	1.07081	0.905262	3.99966	4.26709	8.0704	0.629037	0.936491	0.225432	0.499656	1.92784	7.54935	1.48877	2.21643	0.69798	1.0462	1.15032	2.30638	0.490387	0.23482	0.53818	0.123402	0.723956	2.28067	0.478847	0.229295	0.766538	0.934532	1.04314	3.1252	0.531116	0.246465	0.597232	0.12861	0.553532	3.03505	0.46405
4	4	1	1	0.162387	0.185573	0.423104	0.825514	0.0742486	5.46286	0.0441925	0.122793	0.412747	0.0899423	0.00808963	0.898422	0.41728	0.446235	0.772364	0.833787	0.132021	2.81384	0.0705468	0.256964	0.693323	0.158339	0.0250714	0.717681	0.488096	0.534529	0.959525	0.540842	0.118012	1.30008	0.0618991	0.322118	0.912531	0.218201	0.0476119	0.670826	0.157311	0.167871	0.2931	0.55621	0.0326374	4.93979	0.0170083	0.0738994	0.279559	0.0586782
5	1	1	1	0.167141	0.198866	0.658561	0.668873	0.0721322	3.54687	0.0412492	0.13359	0.654351	0.107841	0.0116298	1.01068	0.185346	0.224101	0.63433	0.506394	0.0638391	2.15692	0.0342791	0.169381	0.627008	0.126066	0.0158926	0.788444	0.274528	0.336554	1.05935	0.58627	0.114227	1.68569	0.063991	0.250214	1.03875	0.194837	0.0379613	0.892303	0.147632	0.165373	0.380819	0.6021	0.0449026	4.3714	0.0243123	0.0992539	0.375803	0.0745766
5	2	1	1	0.351932	0.403387	1.24767	0.244367	0.0482289	0.658751	0.0256597	0.159211	1.17884	0.197363	0.038952	0.570632	0.303714	0.414256	1.59963	0.302866	0.0854186	0.584771	0.0465147	0.212348	1.59142	0.282034	0.0795434	0.612613	0.251606	0.282434	0.792345	0.426563	0.0547927	1.77805	0.0293375	0.146983	0.776585	0.128451	0.0164998	0.693495	0.655682	0.693233	1.18079	0.156006	0.0351503	0.365632	0.0185618	0.239465	1.15189	0.225314
5	3	1	1	1.10473	1.24088	2.79659	0.289914	0.164027	0.272241	0.0871454	0.801372	2.70704	0.565777	0.320104	0.695759	1.93807	2.11315	3.83032	0.236296	0.199239	0.149466	0.106262	1.38456	3.74828	0.843176	0.710946	0.604816	0.509045	0.541851	1.14244	0.481899	0.0895819	1.39492	0.0482034	0.256555	1.04751	0.185893	0.0345564	0.817892	0.821033	0.920133	2.19803	0.191736	0.0797391	0.241392	0.0417503	0.497815	1.99737	0.41588
5	4	1	1	0.0281325	0.0332815	0.10645	0.610187	0.0108659	19.6494	0.00623093	0.0200939	0.106344	0.0178074	0.000317105	0.902139	0.0323868	0.0357978	0.103122	0.777073	0.0118673	28.9578	0.00675381	0.020973	0.0999192	0.0152718	0.000233229	0.858581	0.0185469	0.0214739	0.0513706	0.715883	0.00775902	36.1761	0.00424964	0.0159945	0.0491538	0.0108384	0.000117471	0.843261	0.0363794	0.0400483	0.107969	0.570664	0.00956925	18.059	0.00507796	0.0225326	0.104834	0.0167686
5	1	1	1	0.323775	0.405708	1.86168	0.454517	0.111235	1.00478	0.0601797	0.223689	1.83921	0.244731	0.0598934	0.740725	0.20134	0.230938	0.606016	0.662852	0.0750561	3.28407	0.0421066	0.153472	0.604387	0.113232	0.0128215	0.996577	0.39468	0.497863	1.97593	0.53627	0.162912	0.956827	0.0883028	0.349438	1.95464	0.303788	0.0922871	0.825079	0.26403	0.306162	1.08693	0.530309	0.0822799	1.86504	0.0448972	0.162246	1.07432	0.155155
5	2	1	1	0.652427	0.70301	1.97834	0.303236	0.0794824	0.607126	0.0417119	0.302339	1.8033	0.262114	0.0687039	0.633522	0.605946	0.735317	2.33757	0.414258	0.172741	0.543643	0.0945284	0.382155	2.2786	0.416989	0.17388	0.755945	0.302919	0.328964	0.808646	0.466467	0.0599029	1.93728	0.0319483	0.181669	0.784	0.128418	0.0164913	0.805342	1.26097	1.28037	1.90914	0.310937	0.0691087	0.741439	0.0366267	0.248352	1.53252	0.22226
5	3	1	1	1.192	1.24044	2.28649	0.482652	0.165887	0.746622	0.0881979	0.46133	2.0037	0.343699	0.118129	0.774314	2.17811	2.20572	3.10898	0.569384	0.198335	0.873337	0.105967	0.459343	1.78438	0.348332	0.121335	0.840195	0.679898	0.707353	1.23249	0.413445	0.0807883	1.13469	0.0433249	0.266189	0.940493	0.195403	0.0381822	0.78243	0.893659	0.909879	1.43199	0.408279	0.0699187	1.25563	0.0368243	0.252178	0.88017	0.171252
5	4	1	1	0.124236	0.166121	0.568143	0.135722	0.0150046	0.702529	0.00858649	0.119706	0.563236	0.110554	0.0122223	0.349349	0.11088	0.156265	0.619367	0.232945	0.0257139	1.29258	0.0157501	0.0970849	0.61552	0.110386	0.0121851	0.515128	0.0529234	0.0728159	0.236973	0.235255	0.0117951	2.66019	0.00668711	0.0448511	0.236083	0.0501376	0.00251377	0.439764	0.0349557	0.0415552	0.123991	0.491072	0.0110623	11.9525	0.00606542	0.0208782	0.121828	0.0225269
5	1	1	1	0.175619	0.198532	0.472357	0.647982	0.0600768	3.88475	0.0333927	0.11908	0.462159	0.0927138	0.00859585	0.875513	0.158002	0.181695	0.443957	0.719766	0.0646593	4.43719	0.0358086	0.123446	0.431451	0.0898338	0.00807011	0.897334	0.416617	0.444753	1.01707	0.669751	0.104404	2.42119	0.0588354	0.195457	0.985816	0.155885	0.0243002	0.857198	0.286058	0.307895	0.572181	0.571422	0.0651633	2.69786	0.0350842	0.168224	0.517808	0.114037
5	2	1	1	0.609668	0.653079	1.49595	0.332173	0.0778864	0.752958	0.0413968	0.25854	1.40623	0.234476	0.0549788	0.61217	0.790859	0.837308	1.66279	0.644941	0.17762	1.29251	0.0980346	0.310006	1.63443	0.275406	0.0758483	0.828818	0.175988	0.206269	0.569388	0.439732	0.0473789	2.19905	0.0255288	0.118663	0.56519	0.107745	0.011609	0.716318	1.3279	1.36161	2.1895	0.203441	0.0613467	0.355072	0.0322865	0.362992	1.63729	0.301545
5	3	1	1	1.6766	1.74249	3.32995	0.459808	0.218531	0.525449	0.118687	0.599735	2.64646	0.475265	0.225877	0.825048	3.02446	3.06769	4.97492	0.536376	0.275648	0.565411	0.149326	0.676567	2.90612	0.513909	0.264102	0.856877	0.706788	0.73385	1.25682	0.440086	0.0870107	1.2297	0.0480696	0.302644	1.09836	0.197713	0.0390905	0.804004	1.11144	1.15237	1.9332	0.303855	0.0926229	0.534023	0.0496208	0.332899	1.58701	0.304826
5	4	1	1	0.0866092	0.151238	1.06518	0.10335	0.0128273	0.498004	0.00767153	0.0645875	1.06391	0.124115	0.0154046	0.229767	0.0554805	0.112246	0.897272	0.210481	0.0205598	1.28076	0.0122201	0.0303456	0.895342	0.0976798	0.00954135	0.374945	0.0304616	0.0602274	0.469094	0.152494	0.00793143	1.71604	0.00464219	0.0181443	0.469012	0.0520113	0.00270517	0.344591	0.0276651	0.0374909	0.227215	0.310964	0.00787647	7.14184	0.00458198	0.0241315	0.225875	0.0253292
5	1	1	1	0.156209	0.180558	0.624052	0.704373	0.0638615	4.49752	0.0369697	0.100699	0.621758	0.0906643	0.00822002	0.992001	0.157092	0.184512	0.475293	0.653977	0.0633706	3.69313	0.0346774	0.137605	0.469535	0.0969004	0.00938969	0.859183	0.26194	0.297523	0.762443	0.708332	0.100064	2.85907	0.0570566	0.202809	0.745219	0.141267	0.0199564	0.895527	0.123316	0.144399	0.385018	0.6017	0.0452603	4.38571	0.0248151	0.0797032	0.381649	0.0752208
5	2	1	1	0.508087	0.539568	1.1088	0.339842	0.0617827	0.995692	0.0329083	0.243319	1.07372	0.181799	0.0330507	0.690329	0.437682	0.498275	1.30672	0.56481	0.134648	1.31335	0.0746399	0.288827	1.28063	0.238394	0.0568319	0.837345	0.161124	0.186848	0.525993	0.441371	0.0418021	2.54826	0.0228578	0.109443	0.521335	0.0947098	0.00896995	0.779897	1.11527	1.14062	1.67527	0.218071	0.0521983	0.482513	0.0276456	0.344374	1.03933	0.239364
5	3	1	1	1.4433	1.50546	2.93823	0.461241	0.197678	0.580061	0.106546	0.503681	2.81508	0.428579	0.18368	0.77563	2.63282	2.67683	4.41161	0.484276	0.234353	0.543023	0.127166	0.639004	3.28704	0.483923	0.234182	0.872269	0.885722	0.915767	1.57917	0.348023	0.0810514	0.806323	0.0437336	0.333102	1.4743	0.232891	0.0542384	0.797968	0.833973	0.863559	1.51867	0.289969	0.0650517	0.689138	0.0346834	0.299221	1.17285	0.22434
5	4	1	1	0.116686	0.167809	0.568693	0.113063	0.0136526	0.539652	0.00786876	0.0803423	0.555206	0.120753	0.0145812	0.349786	0.04677	0.0628772	0.205738	0.438046	0.0184322	6.32192	0.0111934	0.039707	0.203329	0.0420782	0.00177058	0.780752	0.0167519	0.0241152	0.12319	0.433573	0.00753068	14.3007	0.00431421	0.010432	0.122588	0.0173689	0.000301679	0.730914	0.0349876	0.0549274	0.361699	0.174976	0.00741831	2.35253	0.00422849	0.0238326	0.359474	0.0423961
5	1	1	1	0.174788	0.196314	0.465307	0.614819	0.0550228	3.84971	0.0308332	0.134876	0.460122	0.0894943	0.00800923	0.941132	0.150038	0.18852	0.606231	0.556458	0.0635991	2.69343	0.0351838	0.11592	0.600446	0.114293	0.0130628	0.837426	0.234982	0.273602	0.861274	0.626808	0.0879609	2.4504	0.0482555	0.166823	0.842863	0.140331	0.0196929	0.828697	0.170245	0.185826	0.47567	0.809317	0.0603616	6.26449	0.0348474	0.0805526	0.461676	0.0745835
5	2	1	1	0.661344	0.689408	1.17286	0.349206	0.0680582	0.940274	0.0357151	0.282999	0.966672	0.194894	0.0379837	0.72696	0.725734	0.795344	1.9438	0.518231	0.168799	0.859196	0.0911556	0.393956	1.83275	0.325721	0.106094	0.828939	0.251387	0.285848	0.827161	0.372578	0.0507451	1.46655	0.0272052	0.14561	0.820799	0.1362	0.0185504	0.71912	1.35468	1.37013	1.94361	0.266115	0.0546636	0.681286	0.0287467	0.259486	1.07079	0.205414
5	3	1	1	1.62023	1.66328	2.56036	0.527244	0.198391	0.749433	0.106109	0.437601	2.31351	0.376279	0.141586	0.882099	3.03262	3.07328	4.51779	0.471428	0.235108	0.503815	0.125307	0.663429	2.67379	0.498715	0.248717	0.893749	1.01639	1.04744	1.8916	0.399605	0.101236	0.856908	0.0549969	0.354932	1.62257	0.253339	0.0641806	0.833726	0.831433	0.889118	1.76567	0.225387	0.0710686	0.376175	0.0374014	0.387778	1.72605	0.315318
5	4	1	1	0.0943807	0.148727	0.758513	0.158228	0.018204	0.76828	0.0101692	0.0980335	0.757451	0.115049	0.0132363	0.398768	0.0588131	0.0946695	0.383182	0.313983	0.023314	2.4935	0.0137478	0.0384735	0.382602	0.0742525	0.00551343	0.546116	0.0348148	0.0550752	0.21995	0.239847	0.010245	3.13262	0.00571561	0.0263773	0.218536	0.0427147	0.00182454	0.484526	0.1049	0.170058	0.831285	0.109425	0.0146598	0.439609	0.0078903	0.101839	0.828223	0.133972
6	1	1	1	0.105392	0.140388	0.562177	0.454245	0.0421683	2.73219	0.0235453	0.0722268	0.556461	0.0928317	0.00861773	0.750241	0.13339	0.168806	0.715582	0.537744	0.0556838	2.92603	0.0313752	0.103937	0.712758	0.103551	0.0107228	0.804753	0.120287	0.140703	0.412758	0.520878	0.038058	3.93595	0.021012	0.0804682	0.403641	0.073065	0.0053385	0.894703	0.128854	0.161722	0.651126	0.566665	0.055431	3.25649	0.0311604	0.0989238	0.648882	0.0978197
6	2	1	1	0.377491	0.396102	0.726551	0.467551	0.056163	2.09439	0.0302203	0.174838	0.666917	0.120121	0.0144292	0.866463	0.540899	0.571525	1.10701	0.74012	0.136763	2.22574	0.0759996	0.219217	1.07194	0.184786	0.0341457	0.847238	0.708887	0.731519	1.33485	0.379193	0.0685401	1.1107	0.0362884	0.222678	1.01753	0.180753	0.0326715	0.696331	0.284011	0.307955	0.692907	0.346967	0.0413535	1.55706	0.0221184	0.146127	0.656001	0.119186
6	3	1	1	0.313318	0.38179	1.36479	0.552694	0.120705	1.40866	0.0671867	0.228313	1.35099	0.218393	0.0476956	0.891972	0.45774	0.573591	1.99324	0.486732	0.168421	0.7807	0.0934751	0.390872	1.98564	0.346024	0.119732	0.768343	0.199142	0.249509	1.01369	0.460181	0.0692492	1.68191	0.0380867	0.15455	1.00669	0.150482	0.022645	0.773536	0.125184	0.144857	0.42805	0.693526	0.0506023	5.34941	0.0284788	0.0897942	0.425563	0.0729638
6	4	1	1	0.0260501	0.0296148	0.0687148	0.882354	0.0124446	35.3683	0.00703547	0.0188611	0.0682216	0.0141039	0.00019892	0.921461	0.0409783	0.0453128	0.0947164	0.725749	0.0140533	21.2265	0.0079591	0.0263051	0.0929584	0.0193639	0.000374961	0.849089	0.0213841	0.0252103	0.0939322	0.688599	0.00920565	29.0811	0.00519742	0.016313	0.0931805	0.0133687	0.000178721	0.951774	0.0256709	0.0291099	0.0803122	0.814387	0.0111918	33.0517	0.00624209	0.0185604	0.0783781	0.0137426
6	1	1	1	0.213311	0.265947	1.1642	0.467429	0.0743338	1.6459	0.0416243	0.157889	1.14733	0.159027	0.0252896	0.809592	0.244274	0.305346	1.01999	0.516244	0.0947006	1.55582	0.0523546	0.200795	1.00366	0.183442	0.0336508	0.733951	0.237344	0.275461	0.79088	0.605551	0.084768	2.35406	0.0461296	0.151147	0.783412	0.139985	0.0195958	0.792952	0.291306	0.363975	1.36866	0.598684	0.130807	1.51771	0.0724529	0.232602	1.35826	0.218491
6	2	1	1	0.462905	0.500443	0.986607	0.504578	0.0960588	1.45646	0.0527856	0.265597	0.955757	0.190375	0.0362425	0.879206	0.780166	0.83106	1.7535	0.687852	0.197193	1.33367	0.109607	0.403611	1.64154	0.286679	0.0821847	0.875373	1.01439	1.04726	2.30286	0.493427	0.128575	1.00052	0.0679353	0.230123	1.79334	0.260577	0.0679002	0.733608	0.302522	0.379804	1.27475	0.325338	0.0747917	0.759169	0.0401213	0.260026	1.26636	0.229889
6	3	1	1	0.673458	0.824392	2.47517	0.510451	0.242949	0.593196	0.134376	0.585242	2.44582	0.47595	0.226529	0.820496	1.0196	1.20416	3.57687	0.479852	0.307721	0.416947	0.171467	0.87482	3.55681	0.641284	0.411245	0.825477	0.517216	0.618566	1.80389	0.42752	0.145194	0.697545	0.0804561	0.491362	1.79036	0.33962	0.115342	0.835295	0.26937	0.31039	0.874503	0.620289	0.095752	2.24003	0.0533777	0.228835	0.861082	0.154367
6	4	1	1	0.0340082	0.040155	0.131852	0.727205	0.0155415	19.4391	0.00887864	0.0259826	0.13068	0.0213715	0.000456741	1.00615	0.0452375	0.0514634	0.139403	0.694656	0.0170608	15.7282	0.00948725	0.0274603	0.136988	0.0245601	0.0006032	0.962082	0.0189047	0.0238305	0.0965661	0.523973	0.00760946	19.7007	0.00415501	0.014285	0.0961649	0.0145226	0.000210906	0.837964	0.0270826	0.0300025	0.0673746	0.747838	0.00966414	31.8776	0.00532349	0.0183036	0.0659717	0.0129228
6	1	1	1	0.213188	0.260382	0.9235	0.576752	0.0863102	2.14874	0.0481206	0.173345	0.917529	0.149649	0.0223948	0.882719	0.257531	0.302184	0.988943	0.644957	0.102066	2.26648	0.0567611	0.184972	0.984581	0.158252	0.0250438	0.951653	0.187697	0.229706	0.64743	0.55008	0.0729145	2.32624	0.0408725	0.140547	0.646058	0.132553	0.0175702	0.845638	0.240684	0.314112	1.15861	0.48429	0.0978454	1.32209	0.0539675	0.20012	1.1525	0.202039
6	2	1	1	0.535341	0.566735	1.03869	0.51135	0.0952142	1.49468	0.051822	0.241483	0.966285	0.186202	0.034671	0.872618	0.886928	0.928038	1.9155	0.785695	0.214841	1.61876	0.121035	0.316248	1.83219	0.273441	0.07477	0.895943	1.08368	1.11749	2.14935	0.454867	0.124223	0.901134	0.0672086	0.386181	1.62337	0.273098	0.0745823	0.798586	0.215775	0.248836	0.890003	0.57777	0.071683	2.55234	0.0392881	0.12722	0.875616	0.124068
6	3	1	1	0.579206	0.705794	2.74629	0.529528	0.213793	0.723672	0.117964	0.469184	2.7149	0.403742	0.163008	0.838817	0.977381	1.1243	4.17593	0.56216	0.312709	0.554401	0.171547	0.731246	4.07452	0.556263	0.309428	0.978852	0.502071	0.571546	1.53696	0.532593	0.145611	1.07042	0.0800107	0.325146	1.51345	0.273399	0.0747472	0.859815	0.187175	0.212762	0.554348	0.667121	0.0675557	3.63537	0.037279	0.147733	0.527639	0.101265
6	4	1	1	0.033622	0.0390061	0.115012	0.771613	0.0152743	22.2026	0.00870012	0.0226228	0.112435	0.0197953	0.000391852	0.933111	0.0465911	0.0514263	0.126157	0.751466	0.0163764	19.7464	0.00937797	0.0261269	0.121422	0.0217927	0.00047492	0.931698	0.0267144	0.031019	0.0826555	0.656853	0.0103656	22.9455	0.00571419	0.020643	0.081988	0.0157808	0.000249033	0.914562	0.0262639	0.0294032	0.074634	0.775081	0.0102569	32.7401	0.00573345	0.0176251	0.0737313	0.0132333
6	1	1	1	0.296165	0.368855	1.77811	0.614219	0.135203	1.59901	0.0774783	0.22409	1.76219	0.220122	0.0484538	0.980221	0.306539	0.369789	1.20109	0.551927	0.114288	1.465	0.0628164	0.253377	1.18746	0.20707	0.0428781	0.855019	0.315038	0.371538	1.36861	0.671344	0.13238	1.88555	0.0733154	0.22299	1.36591	0.197187	0.0388827	0.880245	0.416032	0.503246	2.01342	0.604545	0.171378	1.15854	0.0931029	0.321893	1.9997	0.283482
6	2	1	1	0.59528	0.638389	1.33125	0.494407	0.114127	1.16313	0.0619779	0.341678	1.28867	0.230836	0.0532854	0.867538	0.992043	1.04417	2.11339	0.777611	0.253581	1.34497	0.143028	0.456159	2.08513	0.326103	0.106343	0.905693	1.24891	1.30373	2.97533	0.410571	0.15373	0.579436	0.081235	0.388454	2.45078	0.374429	0.140197	0.716907	0.363033	0.444128	1.38536	0.369858	0.094718	0.785249	0.0514994	0.323665	1.3777	0.256093
6	3	1	1	0.983831	1.15237	3.65825	0.513508	0.308454	0.462327	0.166815	0.722411	3.60707	0.600679	0.360815	0.80078	1.65742	1.83278	4.44671	0.506702	0.396843	0.349475	0.214363	1.04703	4.2407	0.783189	0.613385	0.868241	0.801186	0.881052	2.21957	0.485873	0.178287	0.707747	0.0952953	0.473817	2.07561	0.366942	0.134646	0.863449	0.293341	0.325319	0.873837	0.728218	0.102537	2.87529	0.0570063	0.184288	0.854604	0.140806
6	4	1	1	0.0673451	0.0870728	0.318958	0.50268	0.0277811	5.52933	0.0168884	0.0532967	0.317148	0.055266	0.00305433	0.842628	0.0726124	0.101034	0.364106	0.443099	0.0311697	3.64584	0.018041	0.0589994	0.360828	0.0703447	0.00494838	0.696126	0.0452212	0.070531	0.302833	0.353041	0.0191339	3.66781	0.0107737	0.0350983	0.301751	0.0541975	0.00293737	0.556786	0.0500617	0.083729	0.373861	0.326967	0.0219731	2.77763	0.0125444	0.0411649	0.371232	0.0672029
6	1	1	1	0.353068	0.396766	0.95831	0.814166	0.147537	2.51224	0.0824973	0.215667	0.923616	0.181213	0.0328381	0.918542	0.301754	0.351754	0.860609	0.578973	0.104772	1.73932	0.0569579	0.252991	0.844897	0.180962	0.0327472	0.869655	0.419506	0.466522	1.02036	0.703409	0.143724	1.89391	0.0790685	0.270812	0.998423	0.204325	0.0417489	0.878567	0.564379	0.626072	1.31974	0.812303	0.220378	1.65702	0.121963	0.374923	1.29563	0.2713
6	2	1	1	0.599658	0.645769	1.81416	0.49669	0.119149	1.128	0.0649109	0.350112	1.71637	0.239886	0.0575453	0.836196	0.980099	1.02986	2.29989	0.698067	0.220994	1.22284	0.122557	0.387295	2.14836	0.31658	0.100223	0.896435	1.1595	1.2096	3.09324	0.414466	0.142929	0.639817	0.076088	0.369702	2.47838	0.34485	0.118921	0.731451	0.29438	0.362191	1.03682	0.436736	0.092248	1.13268	0.0505337	0.288861	1.0338	0.211221
6	3	1	1	1.07322	1.23681	3.32782	0.458421	0.282112	0.400013	0.151492	0.754799	3.29067	0.615401	0.378718	0.810842	1.74772	1.95288	4.60578	0.414913	0.361919	0.256491	0.195156	1.2168	4.36497	0.872276	0.760866	0.790048	0.708229	0.80009	1.98388	0.349738	0.130323	0.505125	0.0701384	0.523941	1.90786	0.372631	0.138854	0.704437	0.430283	0.477378	1.17956	0.629981	0.13039	1.6644	0.0713009	0.273976	1.14018	0.206975
6	4	1	1	0.0387338	0.0543793	0.193748	0.341652	0.0130544	5.35888	0.00782379	0.0301358	0.192726	0.0382095	0.00145997	0.744026	0.0487127	0.0623507	0.243977	0.497526	0.0193842	7.35344	0.0111623	0.0326525	0.242203	0.0389612	0.00151797	0.823456	0.0233652	0.0300686	0.139336	0.542026	0.0102695	16.0033	0.00574465	0.0192333	0.138804	0.0189464	0.000358967	0.827806	0.0242762	0.0281424	0.0804498	0.716917	0.0102171	28.1333	0.00571396	0.0177891	0.0799361	0.0142514
7	1	1	1	0.523875	0.616261	2.10152	0.702933	0.228382	1.22478	0.129287	0.361989	2.06983	0.324898	0.105559	0.931876	0.967113	1.16424	2.87787	0.414745	0.269122	0.336928	0.141864	1.01149	2.85273	0.648884	0.42105	0.709701	0.778882	0.876576	2.06308	0.68076	0.274064	0.909734	0.147445	0.579709	2.01981	0.402585	0.162075	0.894149	0.974944	1.17593	2.4083	0.173132	0.113954	0.136637	0.0591932	1.22672	2.40603	0.65819
7	2	1	1	0.8052	0.923058	2.36074	0.752749	0.340169	0.93065	0.190054	0.610275	2.27779	0.451903	0.204216	0.915394	1.31131	1.53401	3.40711	0.613067	0.488641	0.427838	0.271796	1.14515	3.33766	0.797044	0.635278	0.749756	0.617613	0.760438	1.9652	0.400401	0.177866	0.486492	0.0959998	0.496152	1.95395	0.444219	0.197331	0.711525	1.05479	1.07903	1.72693	0.52482	0.119522	1.24254	0.0644445	0.326825	1.25733	0.227739
7	3	1	1	1.22339	1.43678	3.74465	0.55018	0.415112	0.422223	0.240361	0.833831	3.69799	0.754503	0.569274	0.956277	2.22183	2.5162	5.43117	0.548479	0.648676	0.255993	0.358066	1.59646	5.24369	1.18268	1.39874	0.770421	0.964196	1.17855	3.25698	0.288183	0.195587	0.224333	0.103333	0.87761	3.24531	0.678692	0.460622	0.64697	0.560248	0.641098	1.33866	0.328332	0.102472	0.548558	0.053433	0.442933	1.32964	0.3121
7	4	1	1	1.13443	1.27272	3.25752	0.896219	0.517816	0.926533	0.309303	0.784362	3.25525	0.577779	0.333828	0.945091	3.03031	3.39511	6.87702	0.389352	0.596952	0.133902	0.314761	2.27184	6.83252	1.53319	2.35068	0.646883	2.27888	2.47772	4.59122	0.409473	0.398796	0.221166	0.209782	1.48782	4.41201	0.973925	0.948531	0.685769	1.16774	1.36485	3.32889	0.427537	0.302508	0.324212	0.162313	0.917782	3.23546	0.707559
7	1	1	1	0.65508	0.734998	1.68226	0.841714	0.280812	1.44298	0.160606	0.461587	1.64755	0.333619	0.111302	1.04391	1.44232	1.59446	3.26326	0.518964	0.353083	0.400524	0.185399	0.968535	3.17392	0.68036	0.46289	0.784441	1.03201	1.17006	3.04486	0.588724	0.324905	0.577093	0.175766	0.704318	3.00012	0.551879	0.304571	0.914959	1.1037	1.31357	2.83805	0.195751	0.139559	0.142072	0.0722125	1.23884	2.76012	0.71294
7	2	1	1	1.04713	1.20582	3.34356	0.733335	0.439026	0.707635	0.253621	0.815875	3.31624	0.59867	0.358406	0.959872	1.76442	2.139	5.88284	0.363263	0.439784	0.162455	0.238106	1.57407	5.84351	1.21065	1.46568	0.729089	0.832831	0.999931	2.86743	0.318247	0.176333	0.305619	0.0938257	0.679467	2.84272	0.554078	0.307002	0.670895	1.01572	1.08749	2.22651	0.636219	0.247486	0.882478	0.133534	0.498599	2.12704	0.388995
7	3	1	1	1.67502	1.83986	4.76567	0.580382	0.442259	0.429834	0.24959	0.920636	4.61622	0.762015	0.580666	0.979164	3.12119	3.29929	6.58376	0.575608	0.616191	0.296292	0.339544	1.56532	5.73994	1.0705	1.14598	0.959218	0.930578	1.12714	2.51897	0.333027	0.212028	0.277788	0.1126	0.991891	2.51034	0.636668	0.405346	0.694642	0.579448	0.693519	1.66797	0.429769	0.163947	0.600327	0.0873622	0.554723	1.64436	0.381476
7	4	1	1	0.750891	0.933841	3.03002	0.591304	0.328468	0.616341	0.190189	0.900856	3.01185	0.555498	0.308578	0.969604	1.85067	2.2797	5.7476	0.307781	0.409948	0.121277	0.215155	2.22407	5.71847	1.33195	1.77408	0.586252	1.50371	1.86184	4.81867	0.266406	0.292645	0.12923	0.15594	1.82573	4.79849	1.09849	1.20668	0.643874	0.773531	1.00437	3.07771	0.277418	0.177827	0.228241	0.0937816	0.973043	3.06807	0.641006
7	1	1	1	0.581127	0.685037	2.04646	0.743881	0.2701	1.14179	0.150532	0.346219	2.03019	0.363095	0.131838	0.965887	0.523135	0.619804	1.59145	0.471219	0.156792	0.756863	0.0837959	0.398498	1.55461	0.332738	0.110715	0.798049	1.04087	1.19143	2.89978	0.585029	0.339511	0.533459	0.179661	0.788741	2.81273	0.580332	0.336785	0.806713	0.515556	0.565608	1.33719	0.419233	0.0976249	0.945054	0.0512468	0.300091	1.32159	0.232865
7	2	1	1	0.786523	0.882721	2.13439	0.693311	0.278145	0.964964	0.15531	0.5598	2.10312	0.401184	0.160948	0.970774	1.28905	1.43288	3.15644	0.747283	0.46811	0.664057	0.260574	0.849988	3.09913	0.626416	0.392398	0.879277	0.511385	0.587004	1.3308	0.469605	0.135496	0.877484	0.0730514	0.38746	1.32157	0.288532	0.083251	0.768359	1.00191	1.03463	1.77934	0.538465	0.139161	1.12982	0.0754622	0.30551	1.48438	0.25844
7	3	1	1	2.09835	2.27796	4.51609	0.617204	0.547859	0.380537	0.299832	1.24301	4.30351	0.887647	0.787918	0.874146	3.37597	3.61608	6.6884	0.602374	0.781445	0.248305	0.417879	2.15851	5.92546	1.29727	1.68292	0.893862	0.96622	1.17897	3.36699	0.407719	0.275772	0.318286	0.145611	0.850811	3.31139	0.676377	0.457486	0.703471	0.533177	0.676861	1.93114	0.411539	0.171806	0.525368	0.0915622	0.493887	1.92151	0.417471
7	4	1	1	1.30821	1.45512	3.12523	0.904333	0.576814	0.840894	0.342102	0.921056	3.07125	0.637833	0.406831	1.01056	2.85497	3.12735	6.17536	0.490987	0.627427	0.20232	0.330388	1.97168	6.0497	1.27789	1.633	0.696236	2.16573	2.3108	4.05946	0.439403	0.354475	0.286887	0.186705	1.16342	3.9499	0.806719	0.650796	0.766625	1.12435	1.23885	2.56321	0.418553	0.217956	0.418929	0.1136	0.733359	2.48539	0.520738
7	1	1	1	0.565944	0.642529	1.86028	0.709216	0.215987	1.31195	0.121678	0.369847	1.80995	0.304543	0.0927463	1.01131	0.70435	0.829034	2.06606	0.425287	0.186153	0.514335	0.0985416	0.664186	2.03581	0.43771	0.19159	0.753664	0.785944	0.911912	2.1722	0.67366	0.311873	0.777782	0.166698	0.699806	2.16108	0.462953	0.214325	0.926775	0.375314	0.438713	1.29964	0.393113	0.0893992	0.905333	0.046821	0.273926	1.27005	0.227413
7	2	1	1	0.909299	0.977341	2.06521	0.730346	0.261953	1.12925	0.145272	0.499146	1.98189	0.35867	0.128644	0.890209	1.47661	1.64111	3.83912	0.626488	0.449122	0.482191	0.247811	0.878192	3.73435	0.716888	0.513928	0.832216	0.519317	0.629157	2.18499	0.401601	0.14279	0.615781	0.0778455	0.357503	2.15528	0.355552	0.126417	0.764645	1.10589	1.1321	2.09863	0.615529	0.149219	1.35916	0.0798768	0.309447	1.63936	0.242424
7	3	1	1	1.84965	2.00099	4.56578	0.563811	0.430866	0.404988	0.236516	1.05417	4.46198	0.764204	0.584007	0.917719	3.25389	3.40689	6.38431	0.591546	0.5978	0.316586	0.323315	1.56687	6.01415	1.01057	1.02126	0.901393	0.675505	0.846915	3.09124	0.399228	0.204163	0.422356	0.110457	0.53939	3.07646	0.511395	0.261525	0.714353	0.329518	0.397114	1.43705	0.479911	0.106476	1.16022	0.0571112	0.273865	1.41957	0.221866
7	4	1	1	0.897332	0.996936	2.21454	0.921838	0.400889	1.27431	0.240998	0.621985	2.16784	0.43488	0.189121	1.03147	2.62093	2.75529	4.86283	0.503249	0.428232	0.312932	0.22659	1.20687	4.43958	0.850933	0.724088	0.787725	1.29221	1.39902	2.63685	0.269813	0.144827	0.263301	0.0758621	0.767142	2.55757	0.536767	0.288119	0.587337	0.748369	0.836582	1.59998	0.287278	0.107545	0.402156	0.0563595	0.653647	1.51989	0.374357
7	1	1	1	0.432941	0.510028	1.62333	0.640232	0.172812	1.29096	0.0940562	0.291956	1.61022	0.269921	0.0728575	0.825847	0.223314	0.263785	0.731043	0.588138	0.0826725	2.24893	0.0444366	0.206365	0.725537	0.140566	0.0197589	0.80847	0.684032	0.799206	2.4346	0.651448	0.269564	0.852508	0.145969	0.546198	2.37543	0.413792	0.171224	0.868793	0.1283	0.143979	0.328063	0.713172	0.0466505	6.09143	0.0260642	0.0924402	0.321616	0.0654128
7	2	1	1	0.804817	0.87542	2.56849	0.660819	0.227826	1.06975	0.127153	0.399909	2.47023	0.344763	0.118862	0.891923	1.16142	1.28955	3.46152	0.661551	0.371104	0.656731	0.206657	0.661043	3.41636	0.56096	0.314676	0.84916	0.560758	0.655918	2.33736	0.458734	0.156243	0.742643	0.0861512	0.327103	2.33036	0.340597	0.116006	0.785002	1.20057	1.23182	2.20263	0.461772	0.12743	0.908907	0.0692167	0.361563	1.65858	0.27596
7	3	1	1	2.48649	2.61649	5.83239	0.596195	0.486029	0.396247	0.263339	1.02034	5.54617	0.815219	0.664582	0.891219	3.94119	4.10551	8.0378	0.586848	0.675409	0.275804	0.365328	1.64512	7.1492	1.15091	1.32459	0.867682	0.575966	0.625512	1.34818	0.777838	0.189948	1.7696	0.105527	0.342543	1.32881	0.244199	0.0596333	1.03567	0.226802	0.257574	0.704622	0.585746	0.071575	2.60412	0.0388835	0.169128	0.697664	0.122195
7	4	1	1	0.870441	1.00521	2.45269	0.854034	0.429792	1.01058	0.255939	0.67589	2.43777	0.503249	0.25326	1.045	1.89832	2.04683	4.3397	0.493788	0.37833	0.33919	0.199115	0.86064	4.31421	0.766179	0.587031	0.689945	1.24215	1.44824	3.2629	0.305127	0.227424	0.213125	0.118398	1.19413	3.21097	0.745342	0.555534	0.606478	0.667441	0.733092	1.61065	0.327281	0.0993355	0.562072	0.0517796	0.398788	1.55543	0.303517
8	1	1	1	0.238338	0.29346	0.972907	0.530617	0.0909455	1.72025	0.050535	0.200936	0.948565	0.171396	0.0293765	0.87276	0.26677	0.346996	1.50107	0.468676	0.104111	1.14955	0.0567254	0.21335	1.49897	0.222139	0.0493459	0.787582	0.245027	0.306708	1.04466	0.555835	0.102648	1.63856	0.0558824	0.239142	1.03971	0.184674	0.0341045	0.802783	0.164636	0.202283	0.715679	0.552546	0.0650105	2.5512	0.0353163	0.143209	0.709898	0.117656
8	2	1	1	0.325862	0.374345	1.17941	0.538726	0.0993324	1.65769	0.056357	0.266455	1.16036	0.184384	0.0339974	1.04675	0.351357	0.418432	1.39479	0.477803	0.10865	1.13555	0.0587173	0.299049	1.37101	0.227395	0.0517084	0.843418	0.186252	0.224042	0.769496	0.466346	0.0581107	2.05341	0.031884	0.140787	0.761736	0.124609	0.0155273	0.888654	0.446685	0.530078	1.21227	0.369893	0.105645	0.708732	0.0578134	0.44561	1.18282	0.28561
8	3	1	1	1.45869	1.61958	4.65766	0.434857	0.306377	0.334078	0.165831	0.739328	4.31295	0.704545	0.496384	0.693564	2.13075	2.2971	5.87087	0.41831	0.359415	0.258722	0.190998	1.02025	4.85255	0.859206	0.738235	0.697972	0.331513	0.390178	1.17416	0.452569	0.0932285	1.19223	0.0505925	0.292572	1.13528	0.205998	0.0424353	0.770764	0.41598	0.502042	1.41581	0.416978	0.117339	0.802176	0.0635227	0.320522	1.38309	0.281404
8	4	1	1	0.135439	0.164912	0.484151	0.682884	0.0643405	4.33778	0.0385072	0.12793	0.477741	0.0942188	0.00887718	0.783778	0.215574	0.275406	0.703285	0.33637	0.0577329	1.03921	0.0306138	0.242861	0.700567	0.171635	0.0294586	0.481827	0.111458	0.131836	0.336896	0.376247	0.0265297	2.88955	0.0143665	0.116218	0.331246	0.0705115	0.00497187	0.647774	0.0953511	0.113367	0.285472	0.394089	0.0241999	3.4475	0.0129999	0.0928273	0.279793	0.0614071
8	1	1	1	0.297099	0.340551	1.16898	0.538357	0.0897519	1.78735	0.0496771	0.225351	1.15498	0.166714	0.0277937	0.800676	0.297481	0.330273	0.646288	0.814938	0.117106	3.24819	0.0670734	0.226507	0.638915	0.143699	0.0206495	0.860549	0.416584	0.478239	1.3787	0.558052	0.131282	1.25857	0.069653	0.298341	1.37326	0.235251	0.0553428	0.786607	0.21763	0.250009	0.71513	0.630305	0.0776805	2.75434	0.041835	0.163795	0.70774	0.123243
8	2	1	1	0.600146	0.678357	1.90146	0.369795	0.117029	0.63855	0.0639523	0.396513	1.85829	0.316469	0.100152	0.783607	0.369338	0.471228	1.72146	0.490197	0.143572	0.929407	0.0797265	0.307657	1.71416	0.292886	0.0857822	0.818837	0.776514	0.915795	2.18741	0.279026	0.135575	0.312445	0.0737632	0.708313	2.17688	0.485885	0.236084	0.714791	0.354765	0.433131	1.13131	0.341755	0.0849883	0.75207	0.0465099	0.330699	1.12139	0.248682
8	3	1	1	1.46385	1.58011	3.41528	0.42915	0.255551	0.393551	0.139553	0.701135	3.28887	0.595483	0.354599	0.772829	2.32806	2.48682	5.10692	0.359953	0.315018	0.221475	0.169631	1.06112	4.56067	0.875165	0.765914	0.718283	0.369948	0.426067	1.06613	0.447539	0.0946817	1.1485	0.0514043	0.317118	1.05703	0.211561	0.044758	0.806755	0.246534	0.304845	1.01262	0.429014	0.0770007	1.29842	0.0418273	0.214812	1.00934	0.179483
8	4	1	1	0.0360411	0.050374	0.258361	0.361955	0.0127612	5.7059	0.00709246	0.0239229	0.256795	0.0352563	0.001243	0.653947	0.0404164	0.0589985	0.306715	0.364766	0.0157058	4.70859	0.0087294	0.0253956	0.305438	0.0430573	0.00185393	0.570224	0.0320738	0.0460752	0.221318	0.3225	0.0106869	5.38263	0.00591066	0.0231659	0.219866	0.0331376	0.0010981	0.58922	0.0209709	0.0270138	0.122083	0.449628	0.00767014	14.7878	0.0043033	0.0132695	0.120516	0.0170588
8	1	1	1	0.417432	0.480956	1.75854	0.569897	0.136322	1.29492	0.0740943	0.234727	1.6959	0.239205	0.0572191	0.799075	0.375277	0.449539	1.58032	0.577829	0.143196	1.28325	0.0788086	0.2837	1.5579	0.247817	0.0614134	0.827021	0.496034	0.579172	1.37968	0.609625	0.182507	1.07518	0.0963645	0.461237	1.36669	0.299376	0.0896261	0.806835	0.212742	0.246417	0.540188	0.581338	0.0723832	2.50541	0.0388416	0.183113	0.530132	0.124511
8	2	1	1	0.745416	0.814938	2.09629	0.382422	0.12609	0.629908	0.0684785	0.405556	1.97353	0.329715	0.108712	0.747272	0.428997	0.503313	1.29722	0.629761	0.165945	1.31966	0.0916297	0.334088	1.27577	0.263504	0.0694344	0.827639	1.16934	1.23731	2.73469	0.339461	0.137447	0.449553	0.0737005	0.489263	2.27362	0.404897	0.163942	0.730815	0.340263	0.383483	0.837409	0.46732	0.0827407	1.4499	0.0454514	0.302434	0.829299	0.177054
8	3	1	1	1.36315	1.45474	3.28349	0.488791	0.248636	0.516059	0.133531	0.641344	2.82575	0.508677	0.258752	0.72124	2.06123	2.176	4.59536	0.461522	0.322262	0.355393	0.173278	1.08744	3.5486	0.69826	0.487567	0.737926	0.383143	0.483482	1.67476	0.393927	0.116313	0.726781	0.0633621	0.312807	1.66471	0.295266	0.0871818	0.682929	0.305401	0.39768	1.50767	0.360171	0.0918601	0.75748	0.0492729	0.251917	1.50004	0.255046
8	4	1	1	0.0338831	0.0469361	0.255242	0.396991	0.0129109	7.00809	0.00741228	0.0347481	0.254988	0.0325219	0.00105768	0.67932	0.0328281	0.0455742	0.23332	0.44044	0.0139413	7.87669	0.00789178	0.0220929	0.232198	0.0316531	0.00100192	0.744569	0.0200245	0.0300889	0.125449	0.389372	0.00875584	9.79146	0.00495125	0.0135761	0.125052	0.0224871	0.00050567	0.567312	0.0166798	0.020202	0.0598868	0.551998	0.00629959	26.7386	0.00348249	0.0131247	0.058671	0.0114124
8	1	1	1	0.490565	0.548225	1.4842	0.611678	0.14986	1.32992	0.0798266	0.299639	1.45224	0.244998	0.0600238	0.813065	0.344036	0.40529	1.18542	0.590694	0.126685	1.55506	0.0715277	0.307442	1.17289	0.214468	0.0459967	0.938432	0.535847	0.649301	1.63574	0.555345	0.203855	0.79557	0.1072	0.587723	1.61473	0.367078	0.134746	0.742336	0.224599	0.270353	0.692523	0.559195	0.0842405	1.9693	0.0446918	0.245535	0.686748	0.150646
8	2	1	1	0.906393	0.959634	2.03522	0.414174	0.130638	0.708555	0.0704934	0.346458	1.86173	0.315419	0.099489	0.819983	0.503362	0.607825	1.66541	0.515244	0.175668	0.835019	0.0970635	0.43192	1.65357	0.340942	0.116241	0.883521	1.41645	1.47704	2.81682	0.349685	0.146518	0.447224	0.0785152	0.46615	2.1884	0.419	0.175561	0.790968	0.401927	0.443397	1.16173	0.469972	0.0880556	1.37275	0.0481904	0.275259	1.14848	0.187363
8	3	1	1	1.45278	1.59378	3.93808	0.41272	0.270747	0.331973	0.142863	0.706024	3.62323	0.656007	0.430345	0.697689	2.19278	2.34922	5.23483	0.422605	0.356555	0.265623	0.189082	1.08755	4.38991	0.843706	0.711841	0.713538	0.305816	0.365153	1.06951	0.500602	0.0999766	1.33443	0.0532238	0.277687	1.06514	0.199713	0.0398852	0.778404	0.484177	0.56463	1.73067	0.434747	0.1264	0.788732	0.066673	0.371859	1.69424	0.290744
8	4	1	1	0.0740485	0.0995379	0.436277	0.524995	0.0349626	4.59543	0.0203809	0.0580924	0.433732	0.066596	0.00443503	0.781507	0.110056	0.14254	0.469983	0.32044	0.0290607	1.89372	0.0155753	0.110235	0.465705	0.0906901	0.00822469	0.614541	0.0755329	0.0894565	0.236715	0.310121	0.0148815	3.42624	0.00788946	0.0736447	0.235282	0.047986	0.00230266	0.691715	0.039499	0.0524749	0.197337	0.356278	0.0123225	5.59222	0.00668967	0.0280099	0.196868	0.0345868
8	1	1	1	0.481886	0.534582	1.3839	0.656606	0.152152	1.50922	0.0810393	0.248061	1.36559	0.231724	0.0536962	0.784683	0.401845	0.477799	1.43451	0.650526	0.168356	1.37438	0.092052	0.320458	1.41841	0.258799	0.0669771	0.895299	0.508834	0.599205	1.50645	0.718949	0.227784	1.19885	0.120341	0.503335	1.49533	0.316829	0.100381	0.764966	0.156998	0.179419	0.49058	0.686202	0.0596697	4.28104	0.0323708	0.116459	0.484821	0.0869564
8	2	1	1	0.758631	0.838166	2.23128	0.352472	0.125741	0.532739	0.0677977	0.41106	2.19608	0.356739	0.127262	0.722265	0.378881	0.447801	1.31839	0.559894	0.133781	1.29232	0.0737821	0.310029	1.29349	0.238941	0.0570926	0.866496	1.31643	1.39281	3.00144	0.365542	0.166457	0.429536	0.08907	0.630933	2.51164	0.455372	0.207363	0.762793	0.380876	0.409906	0.850285	0.534978	0.0811393	1.90881	0.0439089	0.222673	0.784511	0.151668
8	3	1	1	1.41715	1.50517	3.65482	0.503512	0.255719	0.529194	0.136497	0.632204	3.47496	0.507871	0.257933	0.701205	2.10262	2.22039	4.93251	0.498141	0.355932	0.367436	0.18759	1.07402	3.8989	0.714519	0.510538	0.692676	0.258476	0.302214	0.753147	0.577106	0.0905003	1.95459	0.0480669	0.245684	0.736188	0.156818	0.0245918	0.756397	0.388982	0.433701	0.944042	0.51598	0.0991051	1.44819	0.053426	0.244698	0.86253	0.192071
8	4	1	1	0.0541585	0.0692515	0.258918	0.403413	0.0174315	5.30988	0.0099142	0.0453846	0.256966	0.0432102	0.00186712	0.742714	0.0449223	0.0602128	0.241452	0.437515	0.0175631	6.00713	0.00968014	0.0334193	0.237458	0.0401428	0.00161144	0.652524	0.0299577	0.0405091	0.164092	0.439515	0.0119989	8.82077	0.00657422	0.0231597	0.163237	0.0273004	0.000745312	0.65086	0.0293069	0.038368	0.119824	0.429646	0.0106522	9.68791	0.00595503	0.0272751	0.119305	0.0247929
9	1	1	1	0.109371	0.121671	0.267802	0.947045	0.0506015	10.2563	0.0292804	0.0814317	0.260833	0.0534309	0.00285486	0.689315	0.30623	0.331412	0.523564	0.92324	0.117258	3.94965	0.0637112	0.21982	0.499135	0.127007	0.0161308	0.625811	0.0987159	0.111255	0.259157	0.772094	0.039708	8.07451	0.0213566	0.0697245	0.255158	0.051429	0.00264494	0.637601	0.361979	0.388889	0.683169	0.886306	0.126277	3.36419	0.0682904	0.217295	0.632916	0.142475
9	2	1	1	0.399677	0.419673	0.700227	0.552752	0.0708355	2.34883	0.0385738	0.19881	0.605888	0.128151	0.0164226	0.850135	0.269206	0.2982	0.891724	0.764351	0.0981522	3.3892	0.0558871	0.165661	0.876908	0.128412	0.0164898	0.899948	0.69001	0.698952	1.07027	0.445882	0.0497511	2.22371	0.027685	0.128314	0.694436	0.111579	0.0124499	0.756599	0.566023	0.577864	0.972965	0.606107	0.0706219	2.84463	0.0386194	0.167668	0.702806	0.116517
9	3	1	1	1.02657	1.08757	2.51591	0.540813	0.194428	0.841457	0.108756	0.465828	2.47321	0.35951	0.129247	0.877557	1.91275	1.97498	3.67278	0.456992	0.225033	0.51736	0.12545	0.651586	2.84131	0.492423	0.24248	0.873135	0.859975	0.876736	1.37633	0.43678	0.0746042	1.40614	0.0410234	0.238239	0.929129	0.170805	0.0291744	0.834447	0.215938	0.234083	0.544145	0.784594	0.070978	4.80889	0.0393552	0.116227	0.526671	0.0904646
9	4	1	1	0.126896	0.148546	0.425523	0.882128	0.0682223	6.72787	0.0402408	0.105065	0.420439	0.0773383	0.00598121	0.91061	0.313029	0.349795	0.715862	0.472451	0.0738622	1.59075	0.0388806	0.238328	0.70201	0.156338	0.0244417	0.730346	0.106133	0.117683	0.220725	0.344784	0.0175557	3.54581	0.00919304	0.0862462	0.202695	0.050918	0.00259265	0.657079	0.149195	0.169503	0.354596	0.651229	0.0524687	4.37008	0.0283676	0.125353	0.341501	0.0805688
9	1	1	1	0.106978	0.118808	0.260201	0.920964	0.0476673	10.2871	0.0275582	0.0672995	0.253779	0.0517581	0.0026789	0.962189	0.290275	0.31247	0.599205	0.862516	0.0999086	3.96643	0.0532195	0.190725	0.570376	0.115834	0.0134175	0.656171	0.0801892	0.0882149	0.189399	0.634322	0.0233547	9.39269	0.0127327	0.0481023	0.187725	0.0368184	0.00135559	0.791763	0.291191	0.314452	0.618799	0.828947	0.0985358	3.73651	0.0527959	0.186145	0.587271	0.118869
9	2	1	1	0.39979	0.430895	0.830249	0.468825	0.0754331	1.59274	0.0412332	0.221223	0.794043	0.160898	0.0258882	0.882587	0.323262	0.351714	0.877019	0.786695	0.109124	3.27921	0.0630949	0.172977	0.862882	0.138711	0.0192409	0.988581	0.647963	0.65498	0.964716	0.493683	0.0472496	2.83239	0.0259449	0.105038	0.524637	0.0957083	0.00916008	0.824715	0.580889	0.595147	1.03227	0.539334	0.0699071	2.28629	0.0384111	0.183709	0.780388	0.129617
9	3	1	1	0.641309	0.67707	1.2455	0.681084	0.148074	1.80901	0.0855062	0.294511	1.12831	0.217409	0.0472668	0.865016	1.31566	1.34146	2.08115	0.659112	0.172764	1.44532	0.0993002	0.343394	1.34407	0.262116	0.0687046	0.933782	0.443031	0.457252	0.781687	0.424736	0.0481198	2.07153	0.026589	0.173962	0.590271	0.113294	0.0128354	0.911435	0.140732	0.156762	0.387763	0.668762	0.0462417	5.54212	0.0264972	0.0977895	0.381696	0.0691452
9	4	1	1	0.0331582	0.0374363	0.109528	0.807516	0.01405	27.1607	0.00822234	0.0239647	0.108755	0.0173991	0.000302729	0.983524	0.0595091	0.0677411	0.1764	0.685465	0.0222118	11.8604	0.0124537	0.0426625	0.175033	0.032404	0.00105002	0.922496	0.0146443	0.0181207	0.0566761	0.542175	0.0057933	28.6515	0.0032713	0.0103955	0.0561775	0.0106853	0.000114175	0.791721	0.0315638	0.0339926	0.0742493	0.470929	0.00594945	19.8232	0.00316386	0.017698	0.0715634	0.0126334
9	1	1	1	0.124394	0.139191	0.319622	0.994464	0.0621787	9.47114	0.037026	0.085121	0.31088	0.0625248	0.00390935	1.00334	0.273584	0.291245	0.510213	0.762039	0.0761994	4.05168	0.0405119	0.155218	0.4726	0.0999941	0.00999881	0.782773	0.0758218	0.0834524	0.180304	0.612198	0.0213672	9.47429	0.0115414	0.0441876	0.171864	0.0349024	0.00121818	0.874905	0.192832	0.22593	0.568305	0.638759	0.0752886	2.95322	0.041028	0.166348	0.562913	0.117867
9	2	1	1	0.427442	0.461732	0.908514	0.419187	0.0732732	1.29586	0.0395945	0.301082	0.811501	0.174798	0.0305545	0.771957	0.384935	0.422616	1.06959	0.743737	0.129875	2.40597	0.0733675	0.197365	1.02048	0.174625	0.0304939	0.794457	0.758677	0.768391	1.12451	0.474547	0.0578579	2.14102	0.0318265	0.176543	0.584346	0.121922	0.0148651	0.752863	0.509574	0.525836	0.88436	0.475328	0.0617433	2.02147	0.0341083	0.173516	0.611665	0.129896
9	3	1	1	0.644729	0.681953	1.34171	0.606987	0.135013	1.54319	0.0763503	0.298547	1.30615	0.222431	0.0494757	0.997637	1.35926	1.39664	2.43588	0.466536	0.149886	0.808061	0.083406	0.369987	1.85255	0.321275	0.103217	0.939071	0.47941	0.499177	1.0087	0.370677	0.0516016	1.47947	0.0286709	0.165491	0.784622	0.139209	0.0193792	0.858836	0.250824	0.271393	0.891188	0.528807	0.0548574	2.80046	0.0301374	0.107593	0.81991	0.103738
9	4	1	1	0.028253	0.0350021	0.102926	0.545675	0.0112898	15.0173	0.00642826	0.0217521	0.100715	0.0206895	0.000428056	0.751814	0.0366874	0.0417771	0.113006	0.751383	0.0150357	21.3598	0.00855301	0.0253578	0.11208	0.0200106	0.000400426	0.833678	0.00972717	0.0111685	0.034057	0.701719	0.00385614	73.3423	0.0022148	0.00751032	0.0338207	0.00549528	3.01981e-05	0.956727	0.0153658	0.0172498	0.0425976	0.685745	0.00538262	48.361	0.0029796	0.0104659	0.0418745	0.00784931
9	1	1	1	0.0836395	0.0917325	0.209591	0.954659	0.0360096	14.831	0.0211014	0.0508967	0.205563	0.0377199	0.00142279	0.990361	0.200746	0.211093	0.370432	0.566251	0.0370105	4.70518	0.0201006	0.0801443	0.35074	0.0653606	0.004272	0.811837	0.0698595	0.0767416	0.153495	0.505573	0.0160787	8.71797	0.00881754	0.0477423	0.14761	0.0318029	0.00101142	0.837558	0.119744	0.142729	0.432116	0.581242	0.0452015	4.10745	0.0248407	0.106885	0.421668	0.0777671
9	2	1	1	0.361105	0.378213	0.60081	0.537577	0.0605216	2.57764	0.0326709	0.19741	0.465812	0.112582	0.0126747	0.860139	0.37988	0.405663	1.03013	0.724014	0.103145	2.8489	0.0578197	0.174529	0.921917	0.142462	0.0202954	0.903776	0.609694	0.615746	0.919349	0.534307	0.0460624	3.44828	0.025628	0.105476	0.529406	0.0862097	0.00743211	0.779882	0.341222	0.350111	0.586006	0.662078	0.0519557	4.66377	0.0287201	0.102737	0.446884	0.0784737
9	3	1	1	0.561262	0.584269	1.06079	0.794174	0.129076	2.73786	0.0723219	0.233749	0.935695	0.162528	0.0264155	0.957658	1.13131	1.14664	1.714	0.77315	0.144647	2.30908	0.0808223	0.254629	0.991322	0.187088	0.035002	0.98948	0.389957	0.394873	0.584879	0.703613	0.0437538	6.33336	0.0244906	0.0816278	0.354724	0.0621845	0.00386691	0.937729	0.215965	0.220188	0.334823	0.91155	0.039166	11.8487	0.021874	0.0567186	0.255486	0.0429663
9	4	1	1	0.0317782	0.03556	0.0833855	0.706799	0.0112925	25.0227	0.00638733	0.0187545	0.0799332	0.0159769	0.000255262	0.916789	0.0529136	0.0610894	0.139998	0.510664	0.0156089	9.09714	0.00849926	0.0375785	0.134761	0.030566	0.000934278	0.890658	0.0175693	0.0211131	0.0622351	0.46758	0.00548102	21.0428	0.00289144	0.0146877	0.0616212	0.0117221	0.000137408	0.72415	0.0233898	0.0275881	0.0976448	0.373513	0.00547076	13.55	0.00290686	0.0138759	0.096801	0.0146468
9	1	1	1	0.0953561	0.105362	0.289941	0.969951	0.0435153	12.5748	0.0253096	0.0584218	0.286777	0.0448634	0.00201272	1.02054	0.189064	0.195039	0.322604	0.644181	0.0308929	7.21403	0.0165913	0.0693308	0.275122	0.0479569	0.00229986	0.85915	0.0751976	0.0830878	0.183978	0.445773	0.0157703	6.80654	0.00851879	0.0537066	0.174423	0.0353774	0.00125156	0.761695	0.17763	0.204965	0.571301	0.662218	0.0677939	3.47673	0.0364376	0.130295	0.567702	0.102374
9	2	1	1	0.429837	0.439875	0.810856	0.601647	0.0562736	3.54187	0.0309854	0.131019	0.723721	0.0935324	0.00874832	0.88831	0.423758	0.456337	1.26356	0.719222	0.121912	2.38964	0.0686596	0.225233	1.20228	0.169506	0.0287322	0.980755	0.799325	0.802102	1.08292	0.69108	0.046131	5.69428	0.0253728	0.102348	0.504902	0.0667521	0.00445585	0.913302	0.290887	0.300092	0.607903	0.632328	0.0466878	4.80207	0.0261788	0.0843919	0.509649	0.0738348
9	3	1	1	0.635096	0.679164	1.46665	0.51486	0.124031	1.19508	0.0693547	0.314769	1.28979	0.240902	0.0580336	0.931438	1.24247	1.29599	2.56163	0.381313	0.140691	0.572226	0.0778994	0.531715	1.99479	0.368964	0.136134	0.819775	0.381802	0.395332	0.86588	0.360736	0.0370282	1.9564	0.0206131	0.125607	0.64431	0.102646	0.0105363	0.794556	0.193179	0.202433	0.416469	0.667482	0.0404283	6.0663	0.0222544	0.070902	0.382362	0.0605683
9	4	1	1	0.0260029	0.0341102	0.125441	0.442099	0.00977055	11.6403	0.0056854	0.0168348	0.124447	0.0221003	0.000488425	0.746157	0.0271548	0.0326344	0.110672	0.5587	0.0101237	17.6604	0.00579862	0.0158491	0.108472	0.0181202	0.000328341	0.841905	0.00851117	0.01059	0.0373969	0.530245	0.00334497	46.4487	0.00184844	0.00707224	0.0369201	0.00630835	3.97952e-05	0.836976	0.01351	0.0161014	0.0711049	0.545716	0.00478558	34.9302	0.00268619	0.0087563	0.0702972	0.00876936
10	1	1	1	0.102031	0.126189	0.513535	0.551608	0.0409736	4.24843	0.023441	0.0761973	0.510421	0.0742802	0.00551755	1.07203	0.124248	0.158764	0.650674	0.451243	0.0446159	2.51494	0.0245858	0.0961444	0.648531	0.0988732	0.0097759	0.898848	0.0898567	0.10923	0.570729	0.530224	0.0329417	4.72864	0.018252	0.060665	0.568228	0.062128	0.00385989	0.94759	0.154377	0.1813	0.548228	0.619265	0.0588933	3.58876	0.032458	0.127523	0.544725	0.0951019
10	2	1	1	0.670509	0.712007	1.53649	0.719521	0.172521	1.66168	0.0955309	0.306092	1.49315	0.239772	0.0574907	0.939472	0.55175	0.646613	1.89774	0.704117	0.237651	1.15366	0.131422	0.443354	1.86752	0.337516	0.113917	0.857974	1.41822	1.45456	2.18564	0.568372	0.183814	0.955211	0.099906	0.378173	1.93097	0.323405	0.104591	0.889513	0.446657	0.512941	1.31958	0.579312	0.146255	1.28445	0.0818675	0.317142	1.29827	0.252463
10	3	1	1	2.17104	2.42148	5.53597	0.502951	0.539985	0.247821	0.285661	1.48872	5.47402	1.07363	1.15269	0.785226	3.82206	4.03113	7.35762	0.595922	0.764451	0.247311	0.406971	1.879	6.19853	1.2828	1.64558	0.796502	0.318038	0.373662	1.08524	0.471641	0.0926154	1.30588	0.0503556	0.228486	1.06785	0.196368	0.0385605	0.839595	0.39018	0.452654	1.15516	0.587169	0.134887	1.36558	0.0720654	0.36164	1.15145	0.229724
10	4	1	1	0.045445	0.0594364	0.204595	0.353915	0.0135747	5.38448	0.00792154	0.0398029	0.201913	0.038356	0.00147118	0.764185	0.0469222	0.0542138	0.20983	0.613647	0.0166854	12.5547	0.00928195	0.0294636	0.206799	0.0271905	0.000739323	0.868962	0.0391061	0.0448	0.101457	0.441844	0.00966988	10.9876	0.00526268	0.0304129	0.101184	0.0218853	0.000478965	0.803365	0.0408111	0.0453457	0.125628	0.592526	0.0117266	16.4894	0.00645857	0.0245213	0.123694	0.0197909
10	1	1	1	0.175654	0.202359	0.551172	0.7165	0.0720688	4.12266	0.0417099	0.132536	0.540729	0.100584	0.0101172	1.05968	0.184714	0.205302	0.478602	0.753405	0.067586	4.63336	0.0372866	0.117177	0.471826	0.0897074	0.00804742	0.927738	0.124975	0.143738	0.437894	0.710584	0.0505119	5.48997	0.0277413	0.0877708	0.432999	0.0710851	0.00505308	0.878484	0.308922	0.346145	0.782643	0.735955	0.115048	2.54153	0.0621084	0.214767	0.776754	0.156325
10	2	1	1	1.16401	1.26593	2.65935	0.697374	0.347497	0.775326	0.19251	0.612785	2.52535	0.498293	0.248296	0.924222	1.44291	1.667	4.05659	0.651836	0.544843	0.4369	0.305244	1.08995	3.87999	0.835858	0.698658	0.820951	1.49015	1.54523	2.64696	0.614085	0.251418	0.816632	0.136887	0.590398	2.22178	0.409419	0.167624	0.909513	0.61615	0.714607	1.51354	0.490714	0.177848	0.738267	0.096974	0.540242	1.49654	0.362427
10	3	1	1	1.67196	1.84675	4.62248	0.637326	0.500494	0.433665	0.267442	0.949233	4.48413	0.785303	0.616702	0.820996	3.22994	3.38153	6.51003	0.650025	0.651627	0.348003	0.34972	1.24241	5.81135	1.00246	1.00493	0.816014	0.214868	0.245546	0.586014	0.643749	0.0766111	2.96533	0.0419975	0.170256	0.572135	0.119008	0.0141629	0.879034	0.231842	0.264342	0.663501	0.649252	0.0825587	2.80885	0.045418	0.153589	0.661097	0.12716
10	4	1	1	0.0331699	0.0386528	0.126787	0.721092	0.0143299	21.5414	0.0085071	0.0256682	0.126052	0.0198725	0.000394918	0.90766	0.0573855	0.0637774	0.177489	0.601062	0.0167508	11.7052	0.00909107	0.0388551	0.171194	0.0278687	0.000776667	0.821321	0.035079	0.038797	0.0777368	0.657565	0.0109135	21.5964	0.00594889	0.0244274	0.0762184	0.0165969	0.000275457	0.841547	0.0458825	0.0498481	0.11563	0.627047	0.0122348	17.8104	0.00678066	0.0241472	0.113133	0.0195119
10	1	1	1	0.133089	0.152692	0.464342	0.778961	0.0583794	6.08221	0.0341625	0.0949215	0.446842	0.0749452	0.00561679	0.9703	0.144146	0.159155	0.383951	0.76066	0.0513879	6.26359	0.0285867	0.0898874	0.37842	0.067557	0.00456395	0.927282	0.119714	0.141045	0.377998	0.592228	0.044226	4.31754	0.0240777	0.0773754	0.37299	0.0746773	0.0055767	0.77425	0.247242	0.279234	0.644527	0.685116	0.0890315	2.8551	0.0482149	0.169333	0.640664	0.129951
10	2	1	1	0.904208	0.96104	2.10015	0.74207	0.241894	1.28478	0.136517	0.458167	2.01875	0.325972	0.106258	0.951845	1.0767	1.19235	2.65217	0.875203	0.448882	0.956781	0.251686	0.659992	2.61402	0.512889	0.263055	0.829744	1.16617	1.22238	1.9883	0.485107	0.177957	0.721336	0.0970716	0.502611	1.91425	0.366841	0.134572	0.854752	0.994812	1.09854	2.4779	0.471816	0.220115	0.552853	0.120327	0.585945	2.41056	0.466527
10	3	1	1	1.43139	1.58722	3.24662	0.591591	0.406313	0.459214	0.216617	0.8618	3.1555	0.686814	0.471714	0.803087	2.57652	2.72423	4.86259	0.680805	0.603254	0.418435	0.328536	1.13608	4.63674	0.886089	0.785154	0.801362	0.189948	0.216758	0.563549	0.734647	0.0768187	3.84783	0.0420719	0.142516	0.555796	0.104565	0.0109339	0.835485	0.200054	0.225269	0.469358	0.684232	0.0709565	3.55794	0.0382627	0.14239	0.453505	0.103702
10	4	1	1	0.0522978	0.0693074	0.282113	0.309992	0.0141161	4.01499	0.00832557	0.0473655	0.28043	0.045537	0.00207362	0.804498	0.0560841	0.0622102	0.157003	0.540202	0.0145605	10.991	0.007985	0.0368408	0.152885	0.0269537	0.000726503	0.776101	0.0369764	0.0428302	0.111252	0.44255	0.00957735	10.9897	0.00514697	0.0307426	0.109019	0.0216413	0.000468345	0.789036	0.0441884	0.0484755	0.111749	0.539046	0.0107573	14.7805	0.00588627	0.030395	0.109325	0.0199561
10	1	1	1	0.124084	0.146706	0.443231	0.681224	0.0533704	5.03699	0.0309166	0.104175	0.440408	0.0783448	0.00613791	1.03206	0.115935	0.131123	0.292553	0.718479	0.044056	6.6238	0.0249051	0.0924411	0.28849	0.0613184	0.00375995	0.971314	0.112422	0.133604	0.438668	0.589908	0.042627	4.49535	0.0234727	0.0735014	0.433984	0.0722603	0.00522155	0.830584	0.190674	0.226563	0.764991	0.591041	0.072398	2.63019	0.0394645	0.139391	0.756873	0.122492
10	2	1	1	1.03541	1.1226	2.87629	0.755915	0.328269	0.963619	0.181727	0.491217	2.81882	0.434267	0.188588	0.893622	1.40084	1.5431	3.79904	0.835047	0.541023	0.715276	0.30025	0.786201	3.71253	0.647895	0.419768	0.87358	1.12002	1.17817	2.05966	0.523473	0.191593	0.783572	0.104967	0.613938	1.95433	0.366005	0.133959	0.890272	0.717443	0.792313	1.66866	0.467235	0.157266	0.760821	0.086195	0.487274	1.64043	0.336589
10	3	1	1	1.25761	1.46373	3.87567	0.532713	0.399454	0.392894	0.220913	0.860045	3.829	0.749848	0.562272	0.755428	2.28664	2.44631	5.2787	0.653736	0.568989	0.412733	0.31266	1.08249	5.01701	0.870364	0.757534	0.81548	0.171604	0.198752	0.606151	0.632701	0.0635178	3.48699	0.0351434	0.125666	0.600801	0.100391	0.0100784	0.824217	0.200067	0.231566	0.635006	0.62873	0.0733999	2.9397	0.040065	0.154568	0.629632	0.116743
10	4	1	1	0.0458035	0.0584953	0.222193	0.503259	0.0183315	8.35439	0.0110847	0.0386427	0.221242	0.0364255	0.00132682	0.888689	0.0664637	0.0755032	0.197385	0.504917	0.0181087	7.58965	0.00976241	0.0412686	0.192575	0.0358647	0.00128628	0.734644	0.0399056	0.0467209	0.14861	0.517495	0.0125886	11.6968	0.00692167	0.0262083	0.148172	0.0243261	0.000591758	0.832031	0.0425576	0.047517	0.124333	0.549498	0.0116275	14.1736	0.00634631	0.0268611	0.121095	0.0211602
10	1	1	1	0.150299	0.174499	0.543559	0.721859	0.0640666	4.71075	0.0371065	0.121868	0.538041	0.0887523	0.00787697	0.988755	0.147004	0.170938	0.519191	0.624711	0.054554	4.0295	0.0307288	0.111413	0.510255	0.0873268	0.00762597	0.926721	0.142261	0.15984	0.367756	0.601107	0.0438521	4.57025	0.0243231	0.106628	0.355739	0.0729523	0.00532204	0.894261	0.233239	0.269607	0.696869	0.658711	0.0891743	2.62495	0.0481072	0.190403	0.684437	0.135377
10	2	1	1	0.844515	0.907148	1.78112	0.743836	0.24668	1.21578	0.133712	0.436121	1.68146	0.331633	0.10998	0.924335	0.93829	1.09942	2.50639	0.658521	0.377796	0.634675	0.208895	0.767379	2.43598	0.573704	0.329136	0.863437	1.34111	1.37685	2.04041	0.644009	0.200945	1.12312	0.109344	0.393692	1.67087	0.312022	0.0973574	0.887289	0.910446	1.00373	1.89466	0.468565	0.198238	0.602338	0.107813	0.684891	1.82688	0.423074
10	3	1	1	1.4116	1.57263	3.89897	0.587979	0.408092	0.461631	0.222376	0.836001	3.87454	0.694058	0.481717	0.795834	2.61012	2.74863	5.35823	0.712599	0.614674	0.452626	0.336774	0.999573	5.08581	0.862581	0.744045	0.821225	0.177155	0.207961	0.704756	0.624011	0.0680501	3.11442	0.0370383	0.122715	0.693545	0.109053	0.0118925	0.862134	0.267062	0.301766	0.739848	0.701587	0.0986916	2.74479	0.0543134	0.174713	0.716807	0.140669
10	4	1	1	0.0389815	0.0497845	0.144038	0.416447	0.0129115	8.02892	0.00771779	0.0318386	0.142898	0.031004	0.000961249	0.856179	0.0504325	0.0557776	0.133601	0.669215	0.0159643	15.4169	0.00877336	0.0299456	0.131579	0.0238553	0.000569074	0.813609	0.0271529	0.0305137	0.0649466	0.712648	0.00993298	28.3897	0.00551531	0.0224915	0.0631722	0.0139381	0.000194272	0.937421	0.0328452	0.0358895	0.07123	0.696027	0.0100804	26.8805	0.00563816	0.0205162	0.0688161	0.0144827
11	1	1	1	0.129503	0.152286	0.468471	0.653389	0.0524058	4.50145	0.0289579	0.101836	0.46436	0.0802061	0.00643302	0.931127	0.161966	0.187859	0.592634	0.674451	0.0642546	3.99727	0.0362804	0.130378	0.584288	0.0952695	0.00907628	0.908059	0.11023	0.124686	0.287268	0.739498	0.0431384	6.9285	0.0235773	0.0846078	0.284527	0.0583348	0.00340295	0.952756	0.136568	0.157984	0.44835	0.739626	0.0588036	5.10041	0.0322395	0.105365	0.447006	0.0795045
11	2	1	1	0.499601	0.523375	1.00256	0.423602	0.0661341	1.44005	0.0351003	0.226132	0.878418	0.156123	0.0243744	0.733918	0.434498	0.489272	1.44115	0.58504	0.131748	1.43729	0.0728888	0.286629	1.42197	0.225195	0.0507126	0.883925	1.09044	1.10353	1.6129	0.280934	0.0476739	0.871103	0.0250855	0.196897	0.847788	0.169698	0.0287974	0.620325	0.505431	0.514063	0.76124	0.466053	0.0437713	2.67463	0.0235923	0.141845	0.454754	0.0939191
11	3	1	1	2.34579	2.45298	4.72447	0.437451	0.314069	0.312913	0.161293	1.02809	3.55259	0.717953	0.515457	0.612494	3.37516	3.5401	6.51696	0.438615	0.468934	0.209692	0.239683	1.6695	4.84342	1.06912	1.14303	0.622923	0.658727	0.711707	1.68429	0.31546	0.0850924	0.599261	0.0436022	0.307563	1.38445	0.269741	0.07276	0.554049	0.783528	0.837965	1.66224	0.394658	0.117378	0.675167	0.0597236	0.44195	1.34345	0.297418
11	4	1	1	0.0700674	0.0973298	0.339055	0.183267	0.0123944	1.56911	0.00717689	0.0624783	0.337476	0.0676303	0.00457386	0.550314	0.0451177	0.0564958	0.178542	0.524482	0.0178536	9.33785	0.0108202	0.0391385	0.177175	0.0340404	0.00115875	0.780847	0.0192007	0.0205247	0.0481267	0.61452	0.00446171	48.6607	0.00256513	0.00951142	0.0474995	0.00726048	5.27145e-05	1.0523	0.0193427	0.0213535	0.0431115	0.750968	0.00680099	48.7375	0.00399728	0.0125519	0.0425131	0.0090563
11	1	1	1	0.118205	0.134145	0.360485	0.6647	0.0421958	5.7735	0.0232663	0.0773884	0.358565	0.063481	0.00402984	0.96205	0.141185	0.161951	0.406004	0.71274	0.0566017	4.99374	0.0314936	0.0948661	0.39805	0.0794142	0.00630661	0.959899	0.0785466	0.0865801	0.200851	0.660394	0.0240752	9.71578	0.0129126	0.0546277	0.19636	0.0364559	0.00132903	0.95265	0.132843	0.152983	0.438886	0.589763	0.0447886	4.2439	0.0244763	0.100277	0.428854	0.0759435
11	2	1	1	0.60657	0.636536	1.38947	0.444431	0.0858649	1.23875	0.0462389	0.241173	1.14699	0.193202	0.037327	0.730064	0.460874	0.52361	1.58841	0.624374	0.155326	1.36766	0.0846406	0.27946	1.53546	0.248771	0.0618871	0.868736	1.31298	1.32577	1.89883	0.325739	0.0599003	0.94007	0.0317891	0.238885	0.980748	0.18389	0.0338157	0.642517	0.525939	0.537675	0.871773	0.457185	0.0511292	2.18415	0.0273172	0.147777	0.591781	0.111835
11	3	1	1	2.25211	2.35212	4.60545	0.44944	0.305328	0.341207	0.157474	0.867582	3.80764	0.679353	0.461521	0.618525	3.5208	3.64353	6.28766	0.489245	0.459307	0.268127	0.236316	1.39667	4.34011	0.938807	0.881359	0.652146	0.716461	0.757107	1.6702	0.354857	0.0869451	0.743324	0.0446232	0.264044	1.31408	0.245014	0.060032	0.533308	0.723802	0.764201	1.44393	0.435733	0.106956	0.905709	0.0545709	0.387411	1.18245	0.245463
11	4	1	1	0.0474513	0.0691876	0.228017	0.175842	0.00886335	2.01197	0.00511179	0.0414606	0.227119	0.0504052	0.00254069	0.569773	0.0169718	0.0189963	0.0510097	0.857524	0.00732517	59.1902	0.0043191	0.0109177	0.0500054	0.00854223	7.29698e-05	1.00202	0.0115748	0.0127965	0.0292907	0.707852	0.00386655	73.9302	0.00220589	0.00653313	0.0288431	0.00546237	2.98375e-05	1.02791	0.0155864	0.0173402	0.0355389	1.01786	0.00774307	76.4419	0.00442368	0.0109922	0.0351207	0.00760722
11	1	1	1	0.120684	0.139874	0.354553	0.573513	0.0405993	4.48738	0.0224876	0.107357	0.350916	0.0707905	0.0050113	0.907396	0.152536	0.169323	0.398997	0.857052	0.0630686	6.65984	0.0360642	0.0911416	0.392556	0.0735879	0.00541517	0.910923	0.0847646	0.0966895	0.247084	0.584445	0.0272168	6.72678	0.0145879	0.0587875	0.243343	0.0465686	0.00216863	0.803563	0.136901	0.157528	0.385386	0.56972	0.0444487	3.92032	0.0238626	0.0946174	0.379268	0.0780185
11	2	1	1	0.566114	0.599473	1.31899	0.428238	0.0845569	1.17757	0.0459108	0.266599	1.1166	0.197453	0.0389876	0.67693	0.430126	0.520878	1.81941	0.520664	0.153163	0.952504	0.082425	0.2886	1.77509	0.294168	0.086535	0.710444	1.25566	1.27239	1.85386	0.302055	0.0621959	0.772861	0.0327682	0.240395	0.96681	0.205909	0.0423986	0.590688	0.554666	0.568295	0.910687	0.448144	0.0555156	1.92507	0.0295421	0.177069	0.598434	0.123879
11	3	1	1	2.56294	2.646	4.43126	0.514761	0.338985	0.402225	0.174429	0.923227	3.64301	0.65853	0.433661	0.649494	4.23845	4.35329	7.02614	0.593169	0.589854	0.306606	0.303188	1.59098	4.63338	0.994411	0.988854	0.655796	0.897105	0.926442	1.57229	0.456128	0.10562	1.02207	0.0548018	0.274448	1.06344	0.231557	0.0536187	0.652871	0.779597	0.81192	1.32039	0.50705	0.115135	1.14698	0.0591385	0.339825	1.04356	0.227069
11	4	1	1	0.0656522	0.0941405	0.324401	0.189648	0.0128098	1.63402	0.00745498	0.059882	0.322378	0.0675451	0.00456234	0.533076	0.0348398	0.0445882	0.181822	0.53269	0.0148392	11.2499	0.0087301	0.0305736	0.180044	0.0278571	0.000776019	0.920995	0.0131386	0.0163785	0.0618927	0.38177	0.00373753	22.2791	0.00213533	0.00816898	0.061379	0.00979002	9.58445e-05	0.831605	0.0149382	0.0184379	0.0729622	0.590444	0.00638836	31.6869	0.00370938	0.0113906	0.0724227	0.0108196
11	1	1	1	0.0914743	0.108191	0.334692	0.605232	0.0350047	5.74658	0.0192229	0.0759922	0.332438	0.0578368	0.0033451	0.90224	0.121225	0.142699	0.479962	0.677898	0.0510891	5.0257	0.0285447	0.0829839	0.472512	0.0753641	0.00567974	0.914429	0.0644273	0.0753773	0.253264	0.66248	0.0259488	9.20151	0.0141172	0.0537213	0.249362	0.0391691	0.00153422	0.907208	0.110805	0.131768	0.387215	0.609093	0.0434821	4.5555	0.0232161	0.0740316	0.382629	0.0713882
11	2	1	1	0.488674	0.504543	0.83149	0.451871	0.0567944	1.95131	0.0308254	0.16364	0.766539	0.125687	0.0157973	0.804332	0.340181	0.390676	1.13123	0.617454	0.11875	1.7525	0.0648208	0.252749	1.11363	0.192322	0.0369877	0.861211	0.996724	1.0053	1.26539	0.259576	0.0340444	1.06305	0.0182859	0.219008	0.590969	0.131154	0.0172014	0.674134	0.48523	0.496489	0.789014	0.425934	0.0448298	2.16934	0.0240314	0.171736	0.533731	0.105251
11	3	1	1	1.82449	1.92753	3.68856	0.41185	0.25636	0.342018	0.132517	0.690876	2.864	0.62246	0.387456	0.662236	2.9669	3.07072	5.47076	0.451618	0.357953	0.294212	0.184829	0.947309	3.79009	0.792601	0.628216	0.664817	0.699783	0.739497	1.48323	0.285674	0.0683741	0.613218	0.0351283	0.285566	1.09083	0.239343	0.0572852	0.556178	0.569913	0.598088	1.09973	0.388347	0.0705257	1.09583	0.036141	0.235238	0.818804	0.181605
11	4	1	1	0.110902	0.122953	0.238009	0.229349	0.0122329	2.43574	0.00692945	0.07664	0.204375	0.0533376	0.0028449	0.512921	0.0540356	0.0652556	0.159302	0.702751	0.0258322	11.1222	0.0150284	0.0396622	0.148897	0.0367587	0.0013512	0.556062	0.0177026	0.0185475	0.0321202	0.947609	0.0052692	97.2277	0.00300622	0.0076897	0.0283808	0.00556052	3.09193e-05	0.520783	0.0180072	0.0199298	0.0394222	1.0149	0.00870884	68.7507	0.00506232	0.0127038	0.0370773	0.00858097
11	1	1	1	0.154668	0.189661	0.507342	0.436443	0.0479612	2.15201	0.0259877	0.137408	0.503306	0.109891	0.012076	0.757316	0.158813	0.204805	0.689192	0.516391	0.0668537	2.13193	0.0357327	0.121156	0.680639	0.129463	0.0167607	0.664944	0.102335	0.123877	0.339758	0.521085	0.0364159	3.96097	0.0193448	0.100916	0.3349	0.0698846	0.00488386	0.780304	0.182292	0.220116	0.643118	0.474014	0.0585451	2.04788	0.0312396	0.115447	0.627007	0.123509
11	2	1	1	0.596349	0.634284	1.40689	0.396249	0.0857118	0.960656	0.0449483	0.29193	1.18738	0.216308	0.0467892	0.712685	0.580088	0.65109	1.89655	0.557939	0.165149	1.00985	0.0884778	0.339493	1.85261	0.295998	0.0876151	0.761481	1.29767	1.31064	2.0492	0.32803	0.0604047	0.926503	0.0314167	0.237712	1.05973	0.184144	0.0339089	0.614887	0.672208	0.686399	1.08151	0.430221	0.0598066	1.62717	0.0314448	0.199072	0.732054	0.139014
11	3	1	1	2.24545	2.39703	4.61901	0.430759	0.361736	0.262906	0.185402	1.16419	3.72867	0.839764	0.705204	0.612541	3.22168	3.42661	6.26614	0.435416	0.508769	0.19243	0.262728	1.71996	5.25765	1.16847	1.36531	0.603731	0.568702	0.624251	1.36152	0.30751	0.0792447	0.617509	0.0410077	0.320437	1.17966	0.257698	0.0664082	0.55406	0.7259	0.779918	1.63226	0.404326	0.115439	0.72577	0.0591614	0.4456	1.37763	0.285509
11	4	1	1	0.0479617	0.0733127	0.29026	0.194542	0.0107988	2.01453	0.00620729	0.0437104	0.289159	0.0555091	0.00308126	0.518489	0.0322081	0.0394076	0.137441	0.518118	0.0117778	13.1586	0.00679958	0.0239034	0.135778	0.0227319	0.000516741	0.884987	0.0131751	0.0148544	0.0419759	0.725143	0.00498057	61.3793	0.00289556	0.00857222	0.0410474	0.0068684	4.71749e-05	1.04596	0.0181413	0.0204974	0.0668639	0.773015	0.00738384	46.3355	0.00422769	0.0126633	0.065817	0.00955201
12	1	1	1	0.267623	0.315262	0.892767	0.848138	0.141515	2.96679	0.0825964	0.212348	0.882114	0.166854	0.0278403	1.03294	0.437503	0.478241	0.969445	0.841094	0.162665	2.36358	0.0884042	0.254323	0.957883	0.193398	0.0374026	0.790283	0.754248	0.824433	1.50141	0.769345	0.256422	1.24148	0.137914	0.50528	1.48065	0.333299	0.111088	0.738495	0.157574	0.181288	0.483475	0.729705	0.0654967	4.40441	0.0354839	0.126009	0.4757	0.0897577
12	2	1	1	0.62843	0.679562	1.25337	0.435279	0.112703	0.920285	0.0616962	0.397567	1.24326	0.258921	0.0670403	0.805998	0.530862	0.626476	1.66823	0.547631	0.182388	0.919982	0.102046	0.485373	1.64618	0.333049	0.110922	0.890423	0.884517	0.934168	1.82427	0.440967	0.132667	0.808274	0.0731602	0.384493	1.74241	0.300856	0.0905141	0.799392	1.18289	1.21812	2.00269	0.315278	0.091799	0.568733	0.0482165	0.36219	1.36475	0.291168
12	3	1	1	2.49989	2.55254	4.06152	0.427003	0.220487	0.436339	0.116339	0.632751	2.66113	0.516359	0.266626	0.727797	4.56451	4.64265	6.91289	0.446866	0.379475	0.272586	0.196569	1.13234	4.34963	0.849192	0.721126	0.672444	0.361196	0.421859	1.02848	0.479246	0.104567	1.18751	0.0565343	0.314232	1.01989	0.218192	0.0476077	0.820994	0.658351	0.712114	1.26082	0.334576	0.0909183	0.64301	0.0474821	0.422192	1.22998	0.271742
12	4	1	1	0.0454809	0.0536459	0.100996	0.403396	0.0115262	8.2798	0.00675966	0.0466177	0.0990018	0.0285728	0.000816404	0.671841	0.0268482	0.0299694	0.0680054	0.970203	0.0129761	41.7329	0.00746522	0.0179906	0.0620783	0.0133746	0.000178881	0.46003	0.0245602	0.027147	0.0523385	0.893198	0.0103751	43.2677	0.00583779	0.0163861	0.0507297	0.0116156	0.000134923	0.483718	0.0167663	0.0203821	0.0698217	0.769445	0.00895631	38.756	0.005251	0.0101196	0.0683833	0.01164
12	1	1	1	0.264418	0.304921	0.785266	0.799587	0.121549	3.05003	0.070481	0.211791	0.769837	0.152014	0.0231083	1.05952	0.648398	0.696965	1.31572	0.887641	0.227133	1.8489	0.121059	0.39362	1.2761	0.255883	0.0654762	0.808043	0.561775	0.612997	1.22664	0.735279	0.180555	1.63695	0.0987072	0.367762	1.2078	0.24556	0.0602996	0.785491	0.315437	0.339372	0.732762	0.53011	0.0664343	2.25015	0.0353397	0.1446	0.647427	0.125322
12	2	1	1	0.650667	0.690993	1.44735	0.570743	0.132922	1.35136	0.0732966	0.31436	1.37897	0.232893	0.054239	0.798915	0.760845	0.868482	2.04242	0.50716	0.212653	0.667998	0.117443	0.60356	2.01101	0.419301	0.175814	0.791351	0.83442	0.88324	1.46876	0.53533	0.155214	1.01325	0.0851794	0.376843	1.40439	0.289941	0.0840658	0.850265	1.28863	1.32421	2.14759	0.311693	0.0951491	0.545206	0.0508062	0.497144	1.37061	0.305266
12	3	1	1	2.35163	2.39581	3.80335	0.453222	0.207804	0.517541	0.108801	0.574017	2.89792	0.458505	0.210226	0.724657	4.43466	4.48137	6.69241	0.493237	0.318676	0.398289	0.16626	0.861592	3.57342	0.646092	0.417435	0.76441	0.529271	0.605425	1.37001	0.461371	0.135782	0.845968	0.0732717	0.45773	1.33406	0.294301	0.0866129	0.800675	0.814815	0.878542	1.34227	0.27941	0.0918928	0.443151	0.0479324	0.526977	1.30068	0.328881
12	4	1	1	0.0535166	0.0683054	0.190621	0.337507	0.0143452	4.62943	0.00836323	0.0495306	0.188607	0.0425033	0.00180653	0.803277	0.039991	0.0454783	0.115949	0.925347	0.020067	25.5684	0.0120243	0.0311332	0.113736	0.0216859	0.000470277	0.961242	0.0295502	0.033249	0.0792968	0.819512	0.0125071	31.0878	0.00724094	0.0219545	0.0772733	0.0152617	0.000232919	0.962465	0.0227022	0.0258718	0.0614626	0.820249	0.0101916	40.1881	0.00620431	0.0164837	0.0605866	0.012425
12	1	1	1	0.242173	0.274607	0.682975	0.896235	0.116257	4.06056	0.0683255	0.146128	0.679755	0.129717	0.0168266	0.837445	0.65941	0.703759	1.17574	0.730244	0.179901	1.58339	0.0960992	0.323152	1.14573	0.246358	0.0606921	0.700166	0.439993	0.500944	1.16119	0.754492	0.18104	1.72368	0.0992424	0.315208	1.14745	0.23995	0.0575758	0.709359	0.256807	0.274264	0.569174	0.698727	0.0674086	3.89458	0.0362474	0.112272	0.554178	0.0964735
12	2	1	1	0.621204	0.679021	1.44424	0.475076	0.130404	0.931514	0.0701854	0.368795	1.41499	0.274491	0.0753455	0.806957	0.645623	0.773071	2.38267	0.521405	0.221962	0.684146	0.123981	0.506705	2.36918	0.4257	0.18122	0.888084	0.815345	0.860064	1.36894	0.546157	0.149664	1.09771	0.0824308	0.384016	1.33832	0.274031	0.0750932	0.913815	1.30199	1.34315	2.29597	0.316639	0.104596	0.498682	0.0544161	0.415743	1.67759	0.330333
12	3	1	1	2.17961	2.24106	3.34702	0.450257	0.234931	0.445426	0.121264	0.755134	2.44115	0.52177	0.272244	0.694316	4.49384	4.54373	6.241	0.417372	0.280565	0.326337	0.147464	0.932518	3.44162	0.672217	0.451876	0.756535	0.583952	0.653054	1.66368	0.44619	0.130589	0.827297	0.070866	0.366968	1.62304	0.292677	0.0856597	0.812799	0.619628	0.668583	1.35936	0.275714	0.0693115	0.572193	0.0361605	0.308202	1.29073	0.251389
12	4	1	1	0.0831109	0.0974487	0.246492	0.275365	0.0140299	3.20142	0.00831062	0.0647482	0.237079	0.0509501	0.00259592	0.812206	0.0522983	0.0609651	0.155551	0.754139	0.0236603	14.5847	0.014356	0.0366571	0.154292	0.0313739	0.000984325	0.933594	0.0385961	0.0413476	0.0851989	0.981444	0.0145759	37.9668	0.00837425	0.0216101	0.082034	0.0148515	0.000220568	0.913748	0.0227021	0.0260572	0.0643338	0.852832	0.010923	39.4617	0.0064734	0.0162895	0.0628097	0.0128079
12	1	1	1	0.210669	0.244585	0.741264	0.725039	0.0901964	3.42166	0.0529532	0.157745	0.735225	0.124402	0.0154759	1.00707	0.482362	0.52083	1.0408	0.839362	0.165077	2.3277	0.0900325	0.287183	1.01249	0.196669	0.0386787	0.813801	0.444731	0.498158	1.20756	0.704251	0.158246	1.71715	0.0866999	0.2969	1.18277	0.224701	0.0504905	0.810115	0.143989	0.162841	0.432004	0.505835	0.0385147	3.61949	0.0209837	0.104127	0.426769	0.0761408
12	2	1	1	0.635013	0.668574	1.30556	0.525331	0.110001	1.39234	0.0610482	0.305182	1.24367	0.209394	0.0438458	0.873603	0.435076	0.507748	1.53003	0.641223	0.168029	1.37891	0.0946868	0.338399	1.50418	0.262045	0.0686676	0.855849	1.03621	1.0783	1.9889	0.538716	0.160881	0.976796	0.0871153	0.458016	1.59087	0.298638	0.0891848	0.873814	1.23464	1.28272	2.36921	0.285818	0.0995409	0.42829	0.0519472	0.454211	1.66897	0.348267
12	3	1	1	2.35806	2.41472	3.5324	0.412015	0.214507	0.414317	0.112302	0.732796	2.76696	0.520628	0.271054	0.705707	4.40781	4.47416	6.19789	0.468607	0.360122	0.314787	0.185908	1.17761	3.85308	0.768495	0.590584	0.700466	0.663502	0.724605	1.6186	0.500964	0.146056	0.920846	0.0782732	0.389377	1.58277	0.29155	0.0850015	0.83334	0.956679	1.01945	1.93483	0.27051	0.095373	0.399057	0.0496041	0.434754	1.75594	0.352567
12	4	1	1	0.0481524	0.0592148	0.14819	0.36941	0.0127484	6.49318	0.00773304	0.0498608	0.147609	0.0345101	0.00119095	0.898561	0.0417893	0.0471908	0.123119	0.790616	0.0173562	21.2327	0.0102325	0.0282386	0.122361	0.0219528	0.000481924	0.90261	0.0325052	0.0359486	0.0819892	0.950396	0.0146111	36.0794	0.0085274	0.0229656	0.0796983	0.0153737	0.000236351	0.984888	0.021765	0.0246945	0.0717348	0.922172	0.0107728	46.5373	0.00635089	0.0156553	0.0702838	0.011682
12	1	1	1	0.21641	0.255967	0.907343	0.754223	0.103219	3.20024	0.0599378	0.169987	0.898743	0.136855	0.0187292	1.01163	0.481682	0.526182	1.01868	0.926768	0.196498	2.37731	0.106871	0.316398	0.98552	0.212025	0.0449545	0.8222	0.445055	0.528991	1.45146	0.65048	0.18621	1.23679	0.101353	0.414128	1.44309	0.286265	0.0819478	0.783656	0.192373	0.205879	0.407608	0.76419	0.0561098	5.6699	0.0305668	0.0979753	0.399346	0.0734239
12	2	1	1	0.570958	0.612782	1.53351	0.59121	0.131712	1.46694	0.0728083	0.287921	1.48465	0.222784	0.0496329	0.857383	0.623416	0.742331	2.47938	0.542555	0.218922	0.749378	0.122009	0.584363	2.46144	0.403502	0.162814	0.855079	0.876945	0.913269	1.49385	0.657029	0.167755	1.44395	0.0941308	0.364664	1.36946	0.255323	0.0651899	0.95077	1.08532	1.12374	1.7609	0.314974	0.0918758	0.57445	0.0488769	0.392201	1.23339	0.291693
12	3	1	1	2.19026	2.24756	3.33286	0.497172	0.251016	0.511298	0.130336	0.640165	2.57233	0.504888	0.254912	0.740669	4.45362	4.50239	5.97195	0.485954	0.321534	0.386396	0.16916	1.08421	3.0168	0.661656	0.437789	0.840154	0.436143	0.495774	1.31926	0.471629	0.111309	1.08703	0.0605483	0.282531	1.28912	0.23601	0.0557007	0.817463	0.886833	0.97698	1.95168	0.19632	0.0805646	0.245426	0.0413315	0.63215	1.88117	0.410374
12	4	1	1	0.0848385	0.11865	0.393273	0.1624	0.0134856	1.13344	0.00781568	0.0883846	0.39198	0.0830392	0.00689551	0.516651	0.0496238	0.0614246	0.208751	0.572162	0.0207354	9.48374	0.0124556	0.0394343	0.207201	0.0362404	0.00131336	0.935693	0.0366832	0.0401162	0.0904366	0.922563	0.0149966	33.3133	0.00880265	0.0223044	0.0888417	0.0162554	0.000264239	0.945932	0.0208914	0.0237177	0.0723501	0.824859	0.00927216	44.204	0.00558552	0.0142498	0.0715461	0.0112409
13	1	1	1	0.0988448	0.115019	0.386583	0.700433	0.0412186	6.65738	0.0230545	0.0694151	0.385639	0.0588472	0.003463	0.997478	0.128676	0.144803	0.467518	0.640811	0.0425814	5.30703	0.0234332	0.0773323	0.46052	0.0664492	0.0044155	0.953176	0.102386	0.115168	0.311491	0.68036	0.0358975	6.84605	0.0190586	0.0782026	0.309432	0.0527625	0.00278388	0.898256	0.0469594	0.0541421	0.150904	0.467978	0.0126182	9.453	0.00687248	0.027922	0.147205	0.0269632
13	2	1	1	0.305928	0.328461	0.888814	0.447786	0.0535681	2.05262	0.0293751	0.137651	0.872392	0.119629	0.014311	0.921777	0.20893	0.257678	1.11071	0.482095	0.0727507	1.74229	0.0396762	0.147883	1.10614	0.150905	0.0227724	0.85028	0.397447	0.424152	0.83985	0.31572	0.0467929	1.14473	0.0251454	0.226356	0.737272	0.14821	0.0219662	0.784561	0.307212	0.3306	0.660414	0.356776	0.043601	1.57528	0.0235266	0.189524	0.579259	0.122208
13	3	1	1	0.564215	0.65799	2.05412	0.617518	0.209185	1.02196	0.117273	0.394902	2.049	0.338751	0.114752	0.979908	0.98646	1.10042	2.8398	0.560663	0.273588	0.630179	0.150057	0.691928	2.77962	0.487973	0.238118	0.990633	0.0967534	0.107728	0.288846	0.738215	0.0349916	8.5692	0.0192532	0.0627223	0.283315	0.0474003	0.00224679	1.06381	0.0961039	0.115526	0.364274	0.475913	0.0305304	4.12854	0.0169905	0.0825787	0.362067	0.0641511
13	4	1	1	0.0323642	0.0411527	0.16713	0.603176	0.0153401	13.974	0.00903834	0.0264363	0.166043	0.0254322	0.000646798	0.987451	0.0636653	0.0842483	0.344231	0.355638	0.0196337	3.53447	0.0107723	0.0516082	0.342834	0.0552068	0.0030478	0.688901	0.0329112	0.0415229	0.133126	0.374062	0.00947567	8.12852	0.00521608	0.032239	0.132167	0.0253318	0.000641701	0.781981	0.0318112	0.0385297	0.110492	0.368934	0.00802464	9.1558	0.00433162	0.0246546	0.109983	0.0217509
13	1	1	1	0.110226	0.144027	0.683414	0.5357	0.049691	3.21379	0.0276523	0.0793895	0.678056	0.0927591	0.00860425	0.820876	0.164653	0.204546	0.721729	0.484474	0.0588315	2.1979	0.0324106	0.106767	0.718713	0.121434	0.0147462	0.764217	0.0908695	0.10921	0.365433	0.560983	0.0340027	5.01076	0.0184091	0.0762156	0.363523	0.0606128	0.00367391	0.883157	0.0562443	0.0673518	0.302137	0.47084	0.0174559	7.0087	0.00963336	0.0393159	0.300646	0.0370741
13	2	1	1	0.315684	0.336459	0.818372	0.514517	0.0599204	2.47065	0.033509	0.141092	0.78398	0.11646	0.0135628	1.04583	0.222714	0.260529	1.17773	0.557839	0.0754485	2.24392	0.0410479	0.147999	1.16841	0.135251	0.0182929	0.950578	0.491691	0.513241	0.908396	0.395478	0.0582285	1.45511	0.0315443	0.227485	0.726916	0.147236	0.0216784	0.86299	0.289675	0.303389	0.600706	0.463956	0.041863	2.79707	0.0227725	0.120515	0.517397	0.0902306
13	3	1	1	0.624107	0.712788	2.1799	0.705831	0.243174	1.146	0.136024	0.398158	2.14825	0.344521	0.118695	1.09958	1.13614	1.2643	3.2375	0.832484	0.461999	0.849033	0.26149	0.779989	3.19796	0.554964	0.307985	1.09714	0.162817	0.187408	0.591686	0.522684	0.0485344	3.04171	0.0262264	0.119935	0.585846	0.0928562	0.00862227	0.924506	0.165704	0.198286	0.789445	0.609885	0.0664561	3.09283	0.0367222	0.132285	0.782093	0.108965
13	4	1	1	0.0283254	0.0447731	0.392728	0.360531	0.0125089	6.13057	0.00737995	0.0175656	0.392604	0.0346958	0.0012038	0.737857	0.0555406	0.0891091	0.659649	0.324967	0.0226586	2.6189	0.0127323	0.0388162	0.657767	0.0697259	0.0048617	0.562456	0.0394318	0.0551497	0.210007	0.272489	0.0105128	3.82945	0.00570002	0.0412229	0.209181	0.0385807	0.00148847	0.647467	0.0245983	0.0315359	0.119201	0.384304	0.0075886	10.7419	0.00418845	0.0193363	0.118789	0.0197464
13	1	1	1	0.150391	0.196808	1.05446	0.539347	0.0685025	2.39802	0.0386838	0.116485	1.05126	0.12701	0.0161315	0.911825	0.220366	0.276356	1.11722	0.470211	0.0784545	1.57341	0.0438018	0.173312	1.11669	0.166849	0.0278388	0.813261	0.147646	0.178842	0.781702	0.53712	0.0542329	2.91935	0.0297625	0.103907	0.77721	0.10097	0.0101949	0.895589	0.109536	0.126286	0.341036	0.428357	0.0269348	3.68142	0.0145556	0.0900351	0.337617	0.0628792
13	2	1	1	0.235789	0.254345	0.591738	0.552828	0.0527499	3.24873	0.0295785	0.127658	0.584671	0.0954183	0.00910465	1.12643	0.184936	0.216253	0.718212	0.631077	0.0707743	3.08538	0.0388056	0.133954	0.712152	0.112148	0.0125772	1.01022	0.409129	0.427498	0.729438	0.482228	0.0598136	2.13383	0.0328289	0.174194	0.710818	0.124036	0.0153849	0.995111	0.171816	0.184903	0.393782	0.496307	0.0339285	3.99854	0.0186865	0.0913112	0.387514	0.0683618
13	3	1	1	0.751808	0.84234	2.43732	0.589225	0.223967	0.860288	0.124294	0.467607	2.40475	0.380105	0.14448	1.00523	1.37524	1.46961	3.378	0.581722	0.301566	0.615991	0.165543	0.696226	3.30565	0.518403	0.268742	1.0518	0.139574	0.157204	0.463245	0.657426	0.0475801	5.0554	0.0264797	0.0855409	0.455949	0.0723733	0.00523789	1.04214	0.0704605	0.0794848	0.221196	0.615504	0.0226537	9.37597	0.0127009	0.0455107	0.218406	0.0368052
13	4	1	1	0.0240448	0.0323128	0.152642	0.465099	0.0100456	12.3923	0.00578113	0.0156137	0.151662	0.0215989	0.000466511	0.78004	0.0437171	0.0561078	0.248728	0.398226	0.0140137	6.23014	0.00771514	0.0267083	0.248421	0.0351903	0.00123836	0.754363	0.0172567	0.0230986	0.0963545	0.445331	0.00684171	15.9936	0.00377495	0.0145886	0.0958918	0.0153632	0.000236029	0.782697	0.0176032	0.0208027	0.0713418	0.645837	0.00716338	32.8766	0.0040446	0.01329	0.070667	0.0110916
13	1	1	1	0.117415	0.145291	0.520341	0.652294	0.0558512	4.19166	0.0307302	0.0801681	0.515278	0.0856228	0.00733126	0.932253	0.18695	0.208841	0.606934	0.566672	0.0527758	3.27789	0.0284315	0.101879	0.585894	0.0931328	0.00867373	0.89107	0.107827	0.121848	0.29744	0.690854	0.0392259	6.44793	0.020787	0.0862682	0.2875	0.0567788	0.00322383	0.866478	0.0569022	0.0622275	0.165036	0.568388	0.014324	12.3024	0.00781316	0.031667	0.162402	0.025201
13	2	1	1	0.28221	0.308063	0.83933	0.417036	0.0515448	1.90106	0.0290415	0.159212	0.831694	0.123598	0.0152765	0.897941	0.205867	0.269406	1.20349	0.436959	0.075973	1.37508	0.0415688	0.158565	1.20066	0.173868	0.03023	0.785679	0.372482	0.398944	0.785012	0.300301	0.0429285	1.13647	0.0232239	0.22963	0.717409	0.142951	0.0204351	0.789767	0.281183	0.305802	0.609025	0.336247	0.0404422	1.51051	0.0218513	0.199627	0.597454	0.120275
13	3	1	1	0.5805	0.649596	1.75406	0.67314	0.196359	1.27899	0.108832	0.367224	1.74092	0.291707	0.0850927	0.986072	1.05342	1.12149	2.51747	0.640467	0.246568	0.92002	0.136357	0.511395	2.38348	0.384981	0.148211	1.0081	0.0865862	0.100843	0.26891	0.680651	0.0352056	7.35271	0.0196708	0.0685194	0.266765	0.0517235	0.00267532	1.03537	0.105937	0.121188	0.396847	0.575028	0.033863	5.51402	0.0191223	0.0655903	0.395558	0.0588893
13	4	1	1	0.0197421	0.0278132	0.231043	0.413271	0.00810132	12.0813	0.00464253	0.0105983	0.230197	0.0196029	0.000384274	0.76956	0.032778	0.0424917	0.256588	0.349467	0.00945505	7.11549	0.0052086	0.0179273	0.255375	0.0270557	0.000732008	0.695163	0.013629	0.0181144	0.0725331	0.439192	0.00524369	20.4303	0.00291232	0.00935698	0.072149	0.0119394	0.000142549	0.761704	0.0150812	0.0204797	0.107007	0.372468	0.00516378	14.6792	0.00282137	0.00970119	0.106218	0.0138637
13	1	1	1	0.092275	0.108267	0.378319	0.760053	0.0430662	7.7761	0.0249658	0.0614945	0.374992	0.056662	0.00321058	1.11025	0.154798	0.172716	0.49659	0.439032	0.0336515	3.07938	0.0180917	0.0933618	0.491863	0.0766492	0.00587511	0.840026	0.109391	0.126964	0.339448	0.633098	0.0408229	5.22239	0.0217138	0.0969254	0.337674	0.0644812	0.00415783	0.862185	0.0470693	0.0525922	0.112396	0.608918	0.0142937	14.1167	0.00777864	0.0324593	0.110365	0.0234739
13	2	1	1	0.290501	0.316632	1.17814	0.466563	0.0587975	2.06186	0.0327459	0.132846	1.16498	0.126023	0.0158817	0.943225	0.221439	0.290372	1.54442	0.492887	0.0926299	1.43596	0.0507166	0.179347	1.53913	0.187933	0.0353189	0.846258	0.39679	0.419716	0.785299	0.367026	0.0502426	1.46937	0.0275349	0.214048	0.721779	0.136891	0.0187392	0.897917	0.269774	0.290322	0.644558	0.407772	0.0437691	2.06836	0.0238302	0.152818	0.61348	0.107337
13	3	1	1	0.55683	0.630005	1.5383	0.736118	0.217051	1.40368	0.122039	0.389648	1.50152	0.29486	0.0869421	1.10354	1.03577	1.13186	2.36464	0.845474	0.386076	1.05367	0.21971	0.589996	2.2659	0.456638	0.208518	1.14788	0.142567	0.159391	0.385438	0.711771	0.0507589	5.50444	0.0279935	0.102186	0.381002	0.0713135	0.00508562	1.06965	0.112165	0.134306	0.401883	0.658764	0.0486907	5.07333	0.0277157	0.0951582	0.398768	0.0739122
13	4	1	1	0.0216264	0.0295704	0.223542	0.479409	0.00967456	13.4648	0.00548342	0.011882	0.222696	0.0201802	0.000407239	0.831661	0.0387251	0.0530474	0.31147	0.266721	0.00967612	3.94661	0.00519413	0.0220356	0.3101	0.0362781	0.0013161	0.593417	0.0126476	0.0185206	0.0890158	0.346495	0.00469101	14.125	0.00258898	0.00814446	0.0885543	0.0135385	0.00018329	0.650239	0.0165881	0.0215893	0.097246	0.389313	0.00538296	15.4311	0.00295014	0.0116404	0.0970072	0.0138268
14	1	1	1	0.331401	0.42785	1.77016	0.532908	0.144298	1.1001	0.0806581	0.279358	1.76153	0.270774	0.0733187	0.923353	0.30798	0.361239	1.48594	0.518976	0.0980371	1.47651	0.0526892	0.241596	1.47093	0.188905	0.035685	0.827533	0.63887	0.752467	2.39632	0.533226	0.212118	0.720231	0.113974	0.453786	2.37851	0.397801	0.158246	0.7851	0.161183	0.184644	0.449833	0.597198	0.0538254	3.62019	0.0294082	0.116659	0.444749	0.0901299
14	2	1	1	1.05068	1.23283	4.5852	0.725608	0.46822	0.682181	0.28405	0.714767	4.57875	0.64528	0.416386	1.22422	1.63469	1.88908	6.21499	0.401555	0.380396	0.23278	0.208894	1.00665	6.16217	0.947307	0.897391	0.817674	1.89063	2.15204	5.03156	0.294588	0.303001	0.151291	0.160055	1.41931	4.94806	1.02856	1.05793	0.671528	1.36619	1.55099	4.15883	0.527584	0.387571	0.388284	0.209541	0.902675	4.11021	0.734616
14	3	1	1	1.44358	1.60736	4.57953	0.588705	0.416373	0.457209	0.228709	0.868019	4.49029	0.707268	0.500229	1.04662	2.75315	2.93709	6.71224	0.563211	0.576508	0.298444	0.312702	1.33038	6.55952	1.02361	1.04777	0.94201	1.13948	1.27038	3.07647	0.61166	0.34372	0.592083	0.18697	0.839484	3.03239	0.561946	0.315784	1.0053	0.465907	0.552238	1.67741	0.508086	0.150714	0.927298	0.0815928	0.379445	1.66189	0.296631
14	4	1	1	0.682207	0.76475	2.29283	0.905725	0.313165	1.61554	0.193139	0.455436	2.25817	0.345762	0.119551	1.31535	0.660733	0.772654	2.89902	0.372057	0.149092	0.49006	0.0786939	0.422879	2.87907	0.400725	0.16058	0.745028	1.69789	1.86941	3.73716	0.260925	0.204199	0.175033	0.107201	1.16573	3.66709	0.782598	0.61246	0.627406	0.386473	0.426214	0.970399	0.414088	0.0744527	1.2127	0.0392039	0.259736	0.964283	0.179799
14	1	1	1	0.165854	0.185563	0.505046	0.945644	0.0787452	6.75916	0.046869	0.10773	0.500254	0.0832716	0.00693415	1.19615	0.162743	0.1783	0.415146	0.697446	0.0508311	5.21826	0.027718	0.103876	0.404979	0.0728817	0.00531174	1.08604	0.476679	0.505785	0.996839	0.510941	0.0864497	1.58978	0.0455115	0.224477	0.960608	0.169197	0.0286276	0.871221	0.150309	0.171374	0.410694	0.735018	0.0605398	4.94312	0.0335342	0.112622	0.406475	0.0823651
14	2	1	1	0.903948	1.0195	2.97811	0.449572	0.212057	0.543196	0.120854	0.509294	2.91255	0.471686	0.222488	0.97278	1.02881	1.15804	2.87867	0.54999	0.292536	0.573969	0.162381	0.7247	2.86014	0.531893	0.28291	0.986821	0.605178	0.714984	2.33564	0.41946	0.159789	0.590221	0.0856504	0.445539	2.31815	0.380941	0.145116	0.829009	1.14043	1.23443	2.72692	0.455122	0.215147	0.520532	0.116322	0.585178	2.56725	0.472724
14	3	1	1	0.723058	0.806358	1.94601	0.721501	0.257671	1.13575	0.144857	0.435536	1.92393	0.357132	0.127543	1.12925	1.41778	1.51899	2.85849	0.860071	0.469178	0.882864	0.262724	0.693249	2.8178	0.545511	0.297582	0.948134	0.506746	0.550067	1.2277	0.781112	0.167226	2.00093	0.0917092	0.309999	1.19222	0.214087	0.0458333	1.03716	0.201589	0.220151	0.487428	0.731525	0.0647593	4.47204	0.0350472	0.122928	0.484309	0.0885265
14	4	1	1	0.305528	0.333956	0.847198	1.14264	0.154147	5.33619	0.0971137	0.189792	0.838157	0.134904	0.0181991	1.30592	0.32017	0.358914	0.770919	0.336287	0.0545776	1.09853	0.0289347	0.265858	0.757154	0.162295	0.0263395	0.752616	0.791907	0.839646	1.48515	0.22792	0.0636443	0.427461	0.0333313	0.44735	1.23554	0.27924	0.0779751	0.617624	0.24883	0.260484	0.520423	0.38933	0.0300112	2.6416	0.0156963	0.0975221	0.496918	0.0770841
14	1	1	1	0.272352	0.314748	0.843098	0.609767	0.0962545	2.05126	0.0511134	0.226076	0.834847	0.157854	0.024918	0.878988	0.222163	0.25079	0.683483	0.819893	0.0954537	3.8439	0.0521007	0.168516	0.678809	0.116422	0.0135541	1.0284	0.516064	0.570979	1.17365	0.5881	0.143767	1.26882	0.0758263	0.368968	1.14485	0.244461	0.0597611	0.941688	0.18186	0.202489	0.451806	0.551389	0.0491252	3.23757	0.0256987	0.131002	0.444602	0.0890935
14	2	1	1	0.5076	0.53532	1.12624	0.320056	0.0544458	1.01933	0.029498	0.205043	1.03967	0.170113	0.0289385	0.757368	0.271679	0.332947	1.4374	0.406796	0.0783344	1.11539	0.0413598	0.207369	1.4198	0.192564	0.037081	0.724088	0.279742	0.322214	0.733829	0.313963	0.0502258	1.05302	0.0269484	0.254728	0.724077	0.159974	0.0255916	0.751291	0.906668	0.949448	1.98245	0.183477	0.0517273	0.338285	0.0268881	0.397151	1.63012	0.281928
14	3	1	1	0.937705	0.991441	2.06099	0.373264	0.120244	0.611204	0.0634283	0.433401	2.02314	0.322143	0.103776	0.702616	1.85628	1.89737	3.10305	0.378643	0.148775	0.498006	0.0768838	0.556115	2.16447	0.392917	0.154383	0.722676	0.269607	0.288601	0.67604	0.547374	0.056394	2.79323	0.0296486	0.149267	0.63587	0.103026	0.0106144	0.822252	0.15648	0.17405	0.395975	0.274703	0.0209455	1.8788	0.0109228	0.100211	0.386732	0.0762476
14	4	1	1	0.0481485	0.0589755	0.22703	0.644503	0.0219617	11.5365	0.0133955	0.0464385	0.226085	0.0340754	0.00116114	1.08112	0.0955222	0.113418	0.307168	0.217678	0.0133183	1.90612	0.00713543	0.111432	0.306246	0.0611836	0.00374343	0.589285	0.104128	0.132256	0.408367	0.104883	0.00855718	0.681621	0.0045373	0.152661	0.408144	0.0815882	0.00665663	0.304449	0.0794915	0.0974733	0.257666	0.122687	0.00692473	1.14289	0.00364093	0.109211	0.256726	0.0564422
14	1	1	1	0.218917	0.255846	0.707554	0.776858	0.10292	3.35197	0.0588325	0.180811	0.702675	0.132482	0.0175516	1.17164	0.21194	0.253232	0.851069	0.569218	0.0789326	2.27653	0.0437754	0.160211	0.83611	0.138669	0.019229	0.895295	0.555136	0.627833	1.37054	0.549815	0.161323	0.992033	0.0854053	0.428023	1.36603	0.293413	0.0860912	0.812659	0.160753	0.184401	0.450159	0.618552	0.0559129	3.73	0.0304777	0.116119	0.448955	0.0903933
14	2	1	1	1.05004	1.14824	3.26343	0.327343	0.152172	0.372473	0.0804934	0.446467	3.11606	0.464871	0.216105	0.647153	1.11517	1.24565	3.23891	0.356005	0.19769	0.340185	0.1049	0.671126	3.10732	0.555302	0.30836	0.761976	0.456068	0.532705	2.00209	0.334105	0.092019	0.652018	0.0494593	0.329349	1.9774	0.275419	0.0758558	0.68978	1.13786	1.19988	2.50913	0.282161	0.107496	0.385264	0.0559181	0.528458	2.13034	0.380975
14	3	1	1	1.03502	1.08828	2.19114	0.37472	0.126105	0.577238	0.0653746	0.429426	2.12727	0.336532	0.113254	0.689926	1.71057	1.77638	3.21813	0.336407	0.161269	0.364408	0.0837453	0.622502	3.07455	0.479387	0.229812	0.634062	0.315201	0.348901	0.708888	0.417949	0.0625724	1.45871	0.0326955	0.230678	0.700273	0.149713	0.022414	0.777251	0.240644	0.276808	0.727263	0.226639	0.0310265	0.863943	0.0161913	0.185711	0.707744	0.136898
14	4	1	1	0.051053	0.05927	0.268672	0.905399	0.0272771	18.6684	0.0169442	0.0329926	0.266227	0.0301271	0.000907644	1.27232	0.114131	0.123564	0.32906	0.386113	0.0182943	4.36193	0.0097922	0.0574912	0.323743	0.0473806	0.00224492	0.68661	0.094726	0.0999801	0.199878	0.328915	0.0105267	5.41375	0.00554515	0.0442637	0.194816	0.0320043	0.00102427	0.676664	0.0728887	0.0765437	0.152197	0.328811	0.00768922	7.35463	0.00402192	0.029446	0.14925	0.0233849
14	1	1	1	0.0618974	0.0757232	0.350852	0.596442	0.0260328	7.75193	0.0147678	0.0459192	0.350385	0.0436468	0.00190505	0.989861	0.111154	0.130898	0.324557	0.641053	0.0443434	5.04725	0.0241504	0.0999925	0.322494	0.0691728	0.00478487	0.911161	0.0977781	0.121862	0.428081	0.565731	0.0411717	4.31746	0.0228668	0.0743062	0.425971	0.072776	0.00529635	0.931145	0.0544583	0.0610042	0.145758	0.599395	0.0164887	11.8894	0.00899716	0.0378337	0.144695	0.0275089
14	2	1	1	0.591603	0.607852	1.00351	0.29697	0.0414819	1.12002	0.0218533	0.173446	0.748981	0.139684	0.0195115	0.716425	0.260033	0.289458	0.69481	0.516174	0.0656721	2.15907	0.0349491	0.178177	0.683713	0.127229	0.0161871	0.877699	0.514598	0.533847	0.910085	0.287933	0.0409276	1.0721	0.0216613	0.217742	0.741107	0.142143	0.0202045	0.736052	0.94504	0.967238	1.50587	0.205662	0.0423964	0.511188	0.0217236	0.265731	1.07466	0.206146
14	3	1	1	1.18442	1.24846	2.54938	0.299252	0.118192	0.392337	0.061202	0.527932	2.46551	0.39496	0.155993	0.650114	2.00801	2.07466	3.63404	0.288342	0.150505	0.284609	0.0775421	0.796617	2.54501	0.521969	0.272451	0.6269	0.308488	0.339882	0.799361	0.389179	0.055556	1.45045	0.0295574	0.198444	0.789726	0.142752	0.0203781	0.809978	0.278285	0.316403	0.774339	0.217524	0.0327691	0.753291	0.0170954	0.182908	0.76006	0.150646
14	4	1	1	0.021535	0.027037	0.0985152	0.43959	0.00719112	15.2126	0.00407102	0.0193113	0.0981921	0.0163587	0.000267608	0.899627	0.0224745	0.0299997	0.118061	0.399104	0.00793623	11.3347	0.00448196	0.0138738	0.117008	0.0198851	0.000395419	0.733561	0.0121342	0.016319	0.0600274	0.317912	0.00347139	16.3093	0.00194459	0.00714766	0.0599293	0.0109193	0.000119232	0.697662	0.0136679	0.0169674	0.0630088	0.491718	0.00494706	26.8818	0.00272094	0.0105622	0.0627771	0.0100608
15	1	1	1	0.399184	0.435904	1.2367	0.639581	0.112057	2.00882	0.0616634	0.195208	1.19982	0.175204	0.0306963	1.01751	0.231312	0.26349	1.39706	0.490008	0.0618623	2.11452	0.0337021	0.138177	1.38991	0.126248	0.0159384	0.890288	0.618573	0.679299	1.51726	0.525357	0.147567	0.980849	0.0773877	0.406815	1.5023	0.280889	0.0788987	0.770656	0.359225	0.392291	0.76492	0.521896	0.0823144	1.76588	0.0439283	0.25038	0.74377	0.157722
15	2	1	1	1.70416	1.99009	5.99963	0.564849	0.580821	0.303623	0.321036	1.11847	5.94634	1.02828	1.05735	0.981213	1.74562	2.14834	6.81684	0.49544	0.620725	0.217017	0.340651	1.53447	6.78706	1.25288	1.5697	0.926762	1.8077	2.23003	9.49339	0.375209	0.490206	0.153746	0.262431	1.61418	9.39952	1.30649	1.70691	0.776099	1.54634	1.79603	4.80562	0.438818	0.401067	0.25185	0.210381	1.21778	4.79761	0.913971
15	3	1	1	3.08156	3.26921	8.34731	0.405957	0.443366	0.196193	0.234017	1.2492	7.83266	1.09215	1.19279	0.757833	4.93117	5.15351	10.7752	0.402715	0.603295	0.140603	0.315545	2.06334	9.83312	1.49807	2.24422	0.736487	0.82728	0.948053	2.26184	0.433167	0.200664	0.500131	0.107328	0.585533	2.2395	0.463249	0.214599	0.844411	0.982289	1.23446	3.9071	0.288985	0.216157	0.200984	0.112447	0.949364	3.88939	0.747987
15	4	1	1	0.0660758	0.0915561	0.368606	0.294199	0.0186554	2.61116	0.0104994	0.0688325	0.36782	0.063411	0.00402096	0.593199	0.0393651	0.0544484	0.370998	0.39606	0.0149067	5.94862	0.00842673	0.025841	0.369596	0.0376376	0.00141659	0.836659	0.0529021	0.0766236	0.347903	0.186734	0.0103565	1.76233	0.00542085	0.0426838	0.346768	0.0554613	0.00307595	0.476714	0.0552436	0.0864931	0.405431	0.156972	0.0104526	1.23293	0.00546698	0.0351713	0.404938	0.0665892
15	1	1	1	0.601044	0.717143	3.04376	0.473753	0.185442	0.655169	0.100385	0.500857	3.02928	0.391433	0.15322	0.845756	0.639364	0.865601	4.2704	0.351227	0.205062	0.325825	0.111066	0.66754	4.25203	0.583846	0.340876	0.693907	0.852466	0.96615	2.39888	0.431916	0.196504	0.503929	0.104307	0.646622	2.36728	0.454959	0.206988	0.812965	0.415086	0.495217	1.45161	0.349955	0.0945708	0.695624	0.0508001	0.331813	1.44829	0.270237
15	2	1	1	1.41886	1.70994	6.84561	0.449985	0.429701	0.254806	0.232353	0.939265	6.81854	0.954924	0.91188	0.883979	1.30958	1.66061	6.98039	0.419818	0.42894	0.218754	0.228363	1.10424	6.9231	1.02173	1.04392	0.761054	1.08592	1.42802	4.36553	0.312107	0.289621	0.178239	0.153481	1.21088	4.33912	0.927953	0.861096	0.606737	1.1559	1.47786	5.00141	0.351997	0.32434	0.198652	0.168662	1.18731	4.9861	0.92143
15	3	1	1	3.29942	3.57894	10.4672	0.371203	0.514991	0.13945	0.268408	1.73181	10.3132	1.38736	1.92476	0.665355	5.01547	5.32617	12.9767	0.376977	0.676109	0.109016	0.350666	2.66484	10.8435	1.7935	3.21665	0.646542	0.683644	0.787816	1.9769	0.384045	0.150441	0.515966	0.0791756	0.447056	1.96512	0.391729	0.153451	0.752285	0.741718	0.936522	3.38547	0.308992	0.17677	0.285584	0.0934668	0.627356	3.36321	0.572087
15	4	1	1	0.124939	0.200381	1.10569	0.192892	0.0302365	0.692941	0.0170267	0.0718705	1.10494	0.156753	0.0245716	0.345618	0.0847793	0.160674	1.0101	0.167514	0.0228767	0.655434	0.012224	0.0660973	1.00804	0.136566	0.0186503	0.303995	0.094519	0.216334	1.20229	0.0909684	0.0177122	0.239712	0.00908771	0.047932	1.20176	0.194707	0.0379109	0.128938	0.0652399	0.135148	0.967898	0.111153	0.0131636	0.492195	0.00690305	0.0318502	0.967733	0.118427
15	1	1	1	0.323053	0.356971	0.931106	0.677565	0.102966	2.42404	0.0559793	0.161523	0.917109	0.151965	0.0230934	0.953023	0.224155	0.244507	0.703923	0.599259	0.0585612	3.29335	0.0314506	0.128429	0.701008	0.0977227	0.00954972	0.967162	0.54706	0.604418	1.35674	0.540347	0.138951	1.10232	0.0728929	0.33273	1.33419	0.257152	0.0661269	0.7722	0.325016	0.354601	0.665791	0.512896	0.0727712	1.92029	0.038657	0.227861	0.655425	0.141883
15	2	1	1	1.59258	1.87581	6.54326	0.521986	0.517638	0.291587	0.286749	1.05029	6.44289	0.99167	0.983409	0.964943	1.76269	2.08742	6.76775	0.553089	0.618775	0.271408	0.339701	1.30039	6.74525	1.11876	1.25163	0.987031	1.98145	2.34353	7.96537	0.431242	0.539947	0.183594	0.287818	1.51066	7.89825	1.25207	1.56769	0.794009	1.50719	1.70873	4.00439	0.504199	0.406135	0.328134	0.212906	1.16729	3.9611	0.805506
15	3	1	1	3.61883	3.86223	8.35585	0.401881	0.542575	0.153899	0.280516	1.66711	7.66317	1.35009	1.82273	0.65886	5.65197	5.91504	11.09	0.441211	0.770042	0.129996	0.395975	2.47383	8.62888	1.74529	3.04605	0.704554	0.99406	1.12731	2.68235	0.41883	0.222795	0.41624	0.117782	0.691529	2.60645	0.531946	0.282966	0.783465	1.21687	1.55245	5.87749	0.237586	0.229152	0.129553	0.120518	0.90905	5.8663	0.9645
15	4	1	1	0.0669506	0.0882572	0.35126	0.361156	0.0207819	3.56356	0.0117995	0.0597639	0.349371	0.0575427	0.00331117	0.691217	0.0680441	0.0982899	0.525689	0.232708	0.0165163	1.76477	0.00888972	0.0443697	0.52397	0.070974	0.00503731	0.521488	0.0572559	0.0810786	0.324714	0.226559	0.0130143	2.08259	0.00687192	0.046527	0.323791	0.057443	0.0032997	0.555967	0.053998	0.0784576	0.284113	0.170032	0.00968428	1.55592	0.00504731	0.0386323	0.283447	0.0569556
15	1	1	1	0.265137	0.300448	0.763673	0.595917	0.0842628	2.28174	0.045621	0.179305	0.754781	0.1414	0.019994	1.01608	0.133652	0.1531	0.402119	0.601277	0.0449272	4.42148	0.0246852	0.0986372	0.398894	0.0747196	0.00558302	1.02924	0.412696	0.475955	1.13084	0.527449	0.125127	1.17634	0.0662023	0.33795	1.11244	0.237231	0.0562784	0.836785	0.256969	0.28317	0.624827	0.658673	0.0784021	3.03738	0.0430342	0.160261	0.616881	0.11903
15	2	1	1	1.71781	1.95412	5.34128	0.612686	0.571024	0.366853	0.318658	1.14697	5.3215	0.932001	0.868625	1.0229	1.78534	2.12025	6.50701	0.541715	0.619876	0.261707	0.342675	1.48882	6.48543	1.14428	1.30939	0.980011	1.84486	2.23426	6.69547	0.362021	0.456499	0.154274	0.245305	1.99925	6.64669	1.26098	1.59006	0.771744	1.20812	1.39986	3.63907	0.492412	0.348398	0.365416	0.182928	0.962983	3.6053	0.707532
15	3	1	1	3.46499	3.68456	9.16422	0.413664	0.518772	0.171667	0.269989	1.62116	8.76331	1.25409	1.57275	0.675685	5.29731	5.58562	11.3312	0.397286	0.704396	0.11632	0.365664	2.59876	9.21303	1.77302	3.1436	0.662617	1.1626	1.29442	3.445	0.482536	0.274874	0.451194	0.14641	0.678343	3.40078	0.569645	0.324496	0.802545	0.832888	1.0304	3.05232	0.325931	0.197911	0.27997	0.103228	0.791953	3.04642	0.607216
15	4	1	1	0.0517322	0.0765175	0.330863	0.217382	0.0122629	2.14786	0.00683513	0.035353	0.330271	0.0564119	0.0031823	0.562359	0.0441459	0.0658405	0.418507	0.272869	0.0133366	3.17433	0.00758286	0.029349	0.416613	0.0488754	0.00238881	0.685305	0.0396322	0.0529353	0.23164	0.230785	0.00810328	3.50762	0.00432432	0.0373923	0.231165	0.0351117	0.00123283	0.568336	0.0409071	0.0506184	0.21273	0.278917	0.00832013	4.94275	0.00439826	0.029409	0.212152	0.0298302
15	1	1	1	0.695097	0.757185	1.72732	0.603741	0.181393	1.07177	0.0967487	0.355303	1.69908	0.300449	0.0902696	0.861814	0.668106	0.774688	1.85729	0.74656	0.292921	1.02474	0.157756	0.642412	1.84087	0.392361	0.153947	0.884831	1.00339	1.05576	2.05064	0.621442	0.204192	1.03254	0.111476	0.437236	1.94659	0.328578	0.107963	0.915968	0.297839	0.31734	0.755926	0.493857	0.0541219	2.48994	0.0299041	0.126802	0.722567	0.10959
15	2	1	1	1.54763	1.79504	4.97785	0.532857	0.484856	0.322012	0.26661	1.03143	4.93207	0.909918	0.827951	0.986217	1.81292	2.13752	8.32273	0.529075	0.599456	0.259057	0.332563	1.37803	8.26463	1.13303	1.28375	0.976486	1.74518	2.07595	5.97482	0.384316	0.432306	0.182359	0.230745	1.55552	5.96045	1.12487	1.26534	0.771238	1.24664	1.42011	3.50554	0.490062	0.333506	0.380651	0.176291	0.937848	3.47358	0.680538
15	3	1	1	4.08415	4.28843	8.69442	0.45819	0.599555	0.180573	0.309185	1.70375	6.95789	1.30853	1.71225	0.69582	6.17785	6.49923	12.2668	0.456326	0.921565	0.116125	0.473618	3.01939	10.4427	2.01953	4.07851	0.654052	0.852776	0.948348	3.55709	0.534068	0.221701	0.681443	0.117428	0.539541	3.52764	0.415117	0.172322	0.832954	1.31606	1.54776	4.89635	0.326736	0.266293	0.211725	0.140637	0.942503	4.85711	0.815011
15	4	1	1	0.0492963	0.0752801	0.352268	0.16304	0.00928138	1.61185	0.00522352	0.037055	0.351402	0.0569271	0.0032407	0.520247	0.0347534	0.0432151	0.183499	0.462506	0.0118865	10.5211	0.00694924	0.0226823	0.183078	0.0257003	0.000660503	0.995253	0.0280046	0.034408	0.106369	0.332947	0.00665984	9.00621	0.00360347	0.0229835	0.105693	0.0200027	0.00040011	0.76322	0.0300799	0.0356221	0.108369	0.335469	0.00640515	9.44723	0.00344395	0.0225491	0.107508	0.0190931
16	1	0	0	0.173678	0.194533	0.462423	0.532158	0.0466916	3.25516	0.0250593	0.120532	0.451943	0.0877402	0.00769834	0.728346	0.0830792	0.0966201	0.211698	0.624563	0.0308473	6.7389	0.0164389	0.0759169	0.20794	0.0493903	0.0024394	0.832542	0.240207	0.276937	0.609438	0.470575	0.0649364	1.77887	0.0338738	0.22266	0.603099	0.137994	0.0190422	0.694085	0.0326973	0.0409907	0.119215	0.434042	0.0107434	9.82798	0.00602121	0.0227065	0.117638	0.024752
16	2	0	0	0.704705	0.740658	1.29747	0.318037	0.072577	0.716693	0.0373229	0.368123	1.07723	0.228203	0.0520766	0.584952	0.362702	0.435155	1.11538	0.340375	0.0819247	0.742123	0.0429922	0.36209	1.11423	0.240689	0.0579314	0.668942	0.361981	0.411585	0.949993	0.328807	0.0644784	0.876123	0.033691	0.294577	0.942777	0.196098	0.0384546	0.639145	1.19461	1.21792	1.8311	0.303527	0.0720668	0.655283	0.0369407	0.302221	1.02199	0.237431
16	3	0	0	1.31646	1.37813	2.28119	0.403346	0.164599	0.508379	0.0846618	0.573157	1.8967	0.408084	0.166533	0.629022	2.30366	2.36332	3.54309	0.378492	0.199927	0.369671	0.103144	0.710544	2.3809	0.528221	0.279017	0.628581	0.544898	0.586866	1.16082	0.416408	0.0908503	0.993263	0.0472801	0.289676	1.07647	0.218176	0.0476008	0.680331	0.444215	0.472327	0.963439	0.274263	0.0440717	0.886452	0.0228898	0.170495	0.821862	0.160692
16	4	0	0	0.0543705	0.0768711	0.319262	0.08576	0.00466639	0.866712	0.00256606	0.0331717	0.308209	0.0544122	0.00296069	0.176582	0.0113189	0.0166403	0.0638603	0.31027	0.00378948	15.244	0.00227394	0.00662384	0.0635223	0.0122135	0.00014917	0.686472	0.0149689	0.0185842	0.050237	0.332834	0.00367054	17.4012	0.00211633	0.0138265	0.0501511	0.0110281	0.00012162	0.743538	0.037681	0.0618488	0.272361	0.0617993	0.00303488	0.680413	0.00164093	0.0313435	0.271483	0.0491087
16	1	0	0	0.19114	0.222463	0.557026	0.473729	0.0539877	2.23251	0.028995	0.13555	0.556922	0.113963	0.0129876	0.741844	0.118571	0.137348	0.361244	0.543115	0.0376957	4.26505	0.0205458	0.0959886	0.354207	0.0694064	0.00481725	0.892961	0.271012	0.319324	0.749203	0.386967	0.0654323	1.20179	0.0343611	0.26955	0.745647	0.16909	0.0285915	0.632494	0.0473757	0.0536813	0.131076	0.526413	0.0133049	11.2291	0.00717324	0.0375974	0.130224	0.0252747
16	2	0	0	0.680454	0.71489	1.59803	0.277828	0.0609625	0.660049	0.0317796	0.259848	1.37371	0.219425	0.0481474	0.626237	0.308839	0.376533	1.31458	0.316771	0.0683007	0.785666	0.0365255	0.295357	1.29607	0.215615	0.0464899	0.620452	0.282319	0.319855	0.698431	0.359903	0.0541645	1.26961	0.028756	0.192241	0.693652	0.150497	0.0226495	0.73607	1.27972	1.29952	1.98673	0.279135	0.0631371	0.638763	0.0326799	0.26672	1.0877	0.226188
16	3	0	0	1.38393	1.44762	2.50805	0.394985	0.167915	0.478095	0.0864042	0.518247	2.37134	0.425119	0.180726	0.60434	2.43227	2.49024	4.00301	0.401329	0.21462	0.38525	0.110175	0.698542	2.59034	0.534774	0.285983	0.62453	0.557271	0.596442	1.11382	0.46108	0.0981211	1.1284	0.0511017	0.264105	1.04709	0.212807	0.0452869	0.673556	0.521246	0.541111	0.926102	0.326639	0.0475009	1.15284	0.0243803	0.213063	0.688784	0.145423
16	4	0	0	0.0470849	0.0685264	0.332226	0.114815	0.0057231	1.28941	0.00320371	0.0381548	0.32626	0.0498461	0.00248464	0.267437	0.0152915	0.0226289	0.119646	0.336594	0.00562106	11.862	0.00330813	0.0122189	0.119453	0.0166998	0.000278884	0.713822	0.0163813	0.022359	0.101561	0.273517	0.00416713	9.97019	0.00231424	0.0128369	0.100646	0.0152354	0.000232116	0.641993	0.0354281	0.0624582	0.282006	0.0723163	0.00372412	0.746021	0.00197846	0.0361543	0.281403	0.0514977
16	1	0	0	0.230309	0.263864	0.653379	0.440551	0.0568047	1.83701	0.0305413	0.160539	0.637031	0.12894	0.0166255	0.74121	0.119059	0.139466	0.332195	0.54738	0.0398106	4.10725	0.0217256	0.103853	0.328026	0.0727294	0.00528956	0.896389	0.333223	0.382958	0.812067	0.40428	0.0764005	1.12229	0.0400803	0.304326	0.79195	0.188979	0.035713	0.680959	0.0394976	0.0463975	0.137847	0.534679	0.0130337	11.9001	0.00707135	0.0306592	0.137275	0.0243768
16	2	0	0	0.570378	0.612424	1.23639	0.230547	0.0514792	0.534291	0.0266394	0.308322	1.08154	0.223292	0.0498593	0.549185	0.259761	0.301873	0.759517	0.352965	0.0543523	1.21148	0.028727	0.223709	0.752595	0.153988	0.0237123	0.723588	0.30252	0.354555	0.910148	0.296521	0.0548992	0.834042	0.0285898	0.237832	0.900595	0.185145	0.0342786	0.62356	1.11525	1.1368	1.81176	0.236496	0.0521727	0.55136	0.0268332	0.220237	1.00315	0.220607
16	3	0	0	1.05814	1.1527	3.06823	0.409522	0.187442	0.468551	0.0981604	0.533743	3.01235	0.457709	0.209498	0.655883	1.96223	2.03999	4.07359	0.409095	0.228448	0.380492	0.118651	0.627936	3.6664	0.558423	0.311836	0.622207	0.438935	0.473842	1.05346	0.45245	0.0808473	1.32891	0.0424311	0.214155	1.01653	0.178688	0.0319293	0.698643	0.280006	0.315418	0.813922	0.24264	0.0352698	0.872112	0.0184269	0.193953	0.799574	0.145359
16	4	0	0	0.0393726	0.06212	0.213268	0.106643	0.00513023	1.24883	0.00289008	0.0275835	0.211932	0.0481065	0.00231424	0.247854	0.0160832	0.0245371	0.113014	0.232835	0.00431986	7.35234	0.00253085	0.0137009	0.112898	0.0185533	0.000344224	0.554443	0.018375	0.0305846	0.157785	0.181078	0.00443257	4.03081	0.00241531	0.0129579	0.156686	0.0244788	0.000599214	0.417109	0.0306848	0.0499027	0.176673	0.0762022	0.00300245	1.04359	0.00162011	0.0282588	0.176501	0.039401
16	1	0	0	0.242198	0.275105	0.737406	0.347005	0.045334	1.3885	0.0236986	0.132088	0.710049	0.130644	0.0170677	0.649396	0.0768506	0.095179	0.3299	0.497355	0.0279641	4.8568	0.0153539	0.0523376	0.326389	0.0562256	0.00316132	0.783112	0.383803	0.413614	0.912829	0.396469	0.0612088	1.32797	0.0316518	0.199814	0.760608	0.154385	0.0238347	0.607751	0.0388852	0.0456923	0.125345	0.455544	0.0109448	10.2305	0.00590546	0.0315014	0.124459	0.0240259
16	2	0	0	0.52267	0.561534	0.869001	0.214423	0.0441173	0.551615	0.0233513	0.342908	0.785578	0.205749	0.0423326	0.511863	0.221823	0.261859	0.616554	0.344775	0.0480894	1.31582	0.0255992	0.175033	0.606037	0.139481	0.0194549	0.614011	0.245772	0.285441	0.621959	0.296387	0.0431251	1.08594	0.0229904	0.204204	0.605777	0.145503	0.021171	0.573726	1.06111	1.08226	1.53846	0.228646	0.0487955	0.554501	0.0252543	0.267358	0.88737	0.213411
16	3	0	0	1.13495	1.19809	2.18129	0.383867	0.147475	0.52009	0.0767636	0.541508	2.11169	0.384183	0.147597	0.668037	2.05585	2.10979	3.54155	0.376684	0.17871	0.409716	0.09222	0.614558	2.8288	0.474429	0.225083	0.672783	0.449842	0.490727	1.0175	0.385027	0.0755736	1.02228	0.0393847	0.277082	0.967708	0.196281	0.0385263	0.700324	0.304986	0.322413	0.624938	0.286127	0.0299465	1.4268	0.0156291	0.147965	0.501357	0.104661
16	4	0	0	0.0306038	0.0383273	0.0892837	0.180491	0.00416923	4.4114	0.00235384	0.0345226	0.0891535	0.0230994	0.000533582	0.56863	0.00995715	0.0119902	0.0411861	0.573442	0.00383476	49.3172	0.00220544	0.00748936	0.0403051	0.00668726	4.47194e-05	0.974187	0.012865	0.0170037	0.067567	0.340713	0.00379241	16.7187	0.00207137	0.00943619	0.0674731	0.0111308	0.000123895	0.726796	0.0199042	0.0265373	0.0778003	0.147713	0.00259549	4.54469	0.00140315	0.0216613	0.077164	0.0175712
16	1	0	0	0.260824	0.30053	0.821277	0.372001	0.0555917	1.32876	0.0296742	0.152552	0.796979	0.14944	0.0223322	0.667242	0.0884325	0.103014	0.298344	0.613526	0.0324478	6.51331	0.0182182	0.0689819	0.29751	0.0528874	0.00279708	0.919057	0.391245	0.436651	0.989463	0.414159	0.0803776	1.11413	0.0419635	0.270383	0.945018	0.194074	0.0376648	0.671321	0.0437987	0.0485762	0.150114	0.602745	0.0126746	15.7756	0.00697568	0.0269022	0.14476	0.0210281
16	2	0	0	0.713519	0.757892	1.62164	0.250341	0.0640274	0.501982	0.0328364	0.310309	1.3991	0.25576	0.0654134	0.556531	0.334102	0.409769	1.20076	0.302366	0.0718026	0.671304	0.0378559	0.305859	1.19036	0.237469	0.0563916	0.6286	0.332118	0.379532	0.777546	0.321428	0.0590981	0.913522	0.0308815	0.277649	0.764544	0.183861	0.0338048	0.673453	1.29558	1.32201	2.17372	0.270509	0.071214	0.528181	0.0366057	0.284046	1.40134	0.263259
16	3	0	0	1.21519	1.25528	2.0731	0.424336	0.133681	0.704945	0.0699637	0.436794	1.67639	0.315035	0.0992471	0.653854	2.22491	2.26384	3.60063	0.416839	0.174447	0.517713	0.0906729	0.623487	2.29016	0.418499	0.175141	0.689264	0.333075	0.36906	0.874556	0.466394	0.0742167	1.53939	0.0389806	0.206855	0.856331	0.159129	0.025322	0.69651	0.24275	0.269264	0.603632	0.276917	0.0323003	1.26254	0.0171774	0.15224	0.588819	0.116642
16	4	0	0	0.0379787	0.0572694	0.313194	0.151801	0.00651468	1.97772	0.00364252	0.0334095	0.312271	0.042916	0.00184178	0.333761	0.01196	0.019766	0.0989455	0.290524	0.00457743	10.5069	0.00260827	0.00747313	0.0986774	0.0157558	0.000248244	0.569502	0.0171367	0.0303099	0.125281	0.181993	0.00455532	3.99974	0.00250588	0.00932164	0.125145	0.0250302	0.000626511	0.406658	0.0274214	0.039154	0.156287	0.138791	0.00388357	2.64166	0.00206832	0.0251824	0.155427	0.0279815
17	1	0	0	0.231174	0.263137	0.719527	0.71424	0.089887	3.17879	0.0503463	0.14819	0.713861	0.12585	0.0158382	0.978317	0.282592	0.32647	0.860338	0.721023	0.118013	2.37227	0.0635509	0.239873	0.846129	0.163674	0.0267891	0.846004	0.227625	0.267983	0.636589	0.6263	0.0886831	2.50551	0.0502358	0.215172	0.63189	0.141598	0.0200501	0.874041	0.101381	0.119129	0.386868	0.703467	0.0440617	6.2951	0.0246967	0.0731581	0.381684	0.0626351
17	2	0	0	0.440482	0.488239	1.02959	0.379058	0.0799236	0.969121	0.0430841	0.294921	0.995787	0.210848	0.0444568	0.765575	0.857322	0.873582	1.33842	0.487423	0.081867	1.61602	0.0455884	0.250481	0.919636	0.167959	0.0282102	0.969069	0.307906	0.331923	0.619655	0.544055	0.0675219	2.49353	0.0384076	0.170214	0.597023	0.124108	0.0154029	0.971468	1.03518	1.05707	1.72787	0.383697	0.0822154	0.982063	0.0450888	0.262737	1.38736	0.214272
17	3	0	0	0.94623	1.04587	2.21778	0.56925	0.253873	0.69439	0.138111	0.614859	2.17986	0.445978	0.198896	0.908063	0.751015	0.805015	1.58905	0.69302	0.201096	1.36814	0.115198	0.405555	1.54594	0.290173	0.0842005	1.00862	1.88395	1.96013	3.33663	0.624866	0.338495	0.643125	0.188724	0.719571	2.80505	0.541709	0.293449	0.944626	0.540565	0.617082	1.61569	0.471223	0.140393	0.871646	0.0773715	0.427573	1.58219	0.297934
17	4	0	0	0.0653468	0.0902145	0.338301	0.126497	0.00787771	1.17338	0.00455072	0.0430712	0.334529	0.0622759	0.00387829	0.400282	0.0187394	0.0255633	0.0993533	0.433034	0.00753887	14.9137	0.00452016	0.0151386	0.0986855	0.0174094	0.000303087	0.834456	0.021442	0.0251079	0.0714888	0.51631	0.00675323	23.1959	0.00396839	0.0141995	0.0713695	0.0130798	0.000171081	0.940038	0.0278777	0.0440348	0.173794	0.154829	0.0052843	2.6056	0.00303514	0.0234349	0.173491	0.03413
17	1	0	0	0.219451	0.251373	0.796907	0.587502	0.0721028	2.64688	0.0398676	0.13553	0.789966	0.122728	0.0150621	0.892108	0.263953	0.293696	0.793118	0.685709	0.0884062	2.95709	0.0491531	0.175301	0.783906	0.128927	0.0166221	0.96215	0.259131	0.304929	1.08164	0.620817	0.0998904	2.19371	0.0567937	0.197317	1.07906	0.160902	0.0258893	0.923829	0.100639	0.120667	0.411957	0.627014	0.0417895	5.2785	0.0234472	0.0728414	0.405537	0.0666484
17	2	0	0	0.563017	0.610174	1.2458	0.324612	0.0764384	0.732035	0.0405907	0.368368	1.18555	0.235476	0.0554491	0.712583	1.01494	1.03532	1.49223	0.412228	0.0843541	1.09331	0.0457805	0.268887	1.10698	0.20463	0.0418733	0.860749	0.320571	0.3593	1.2847	0.420471	0.0683063	1.41556	0.0373576	0.178843	1.27395	0.162452	0.0263906	0.799965	1.06601	1.09239	1.77251	0.313989	0.0750026	0.693605	0.0395764	0.269122	1.47334	0.23887
17	3	0	0	1.10473	1.22402	2.96328	0.464111	0.244827	0.479892	0.133542	0.659587	2.93261	0.527519	0.278276	0.883941	0.952352	1.01453	2.23444	0.667999	0.233818	1.0895	0.133484	0.444337	2.11956	0.350027	0.122519	1.08705	1.95356	2.07586	4.20125	0.431298	0.303037	0.332409	0.1641	1.07223	3.8617	0.702616	0.49367	0.86953	0.925594	1.02169	2.34783	0.48146	0.208449	0.607611	0.113895	0.620323	2.27401	0.432952
17	4	0	0	0.0698898	0.0916172	0.310833	0.149234	0.00885136	1.43515	0.00504874	0.0503152	0.302435	0.0593121	0.00351792	0.457013	0.0238553	0.032936	0.133577	0.421455	0.00958283	10.877	0.00562336	0.0194121	0.132574	0.0227375	0.000516995	0.840532	0.0203604	0.0239977	0.071618	0.594736	0.00756378	27.7231	0.00448406	0.0165455	0.070431	0.0127179	0.000161744	1.00934	0.0247716	0.0344725	0.130447	0.228924	0.00549492	5.52976	0.003186	0.0252558	0.130278	0.0240033
17	1	0	0	0.296708	0.349693	1.12415	0.611245	0.113226	1.83416	0.0629363	0.197383	1.11982	0.185239	0.0343135	0.993447	0.243579	0.283336	1.03226	0.580642	0.0841176	2.21888	0.0465683	0.17699	1.01461	0.14487	0.0209873	0.966196	0.437319	0.505641	1.53493	0.61469	0.156165	1.33835	0.0863825	0.335773	1.52371	0.254055	0.0645441	0.938718	0.110837	0.124765	0.397788	0.722674	0.0414361	7.19833	0.0236648	0.0686945	0.396049	0.0573371
17	2	0	0	0.658	0.720104	1.39976	0.463747	0.135807	0.854337	0.0732673	0.420047	1.35843	0.292847	0.0857592	0.848902	1.27991	1.30997	2.19523	0.463442	0.129445	0.921702	0.071907	0.344921	1.95632	0.279313	0.0780155	0.933874	0.495821	0.566366	1.59895	0.40968	0.112258	0.824275	0.0618896	0.337296	1.5781	0.274014	0.0750837	0.862809	1.44303	1.49146	2.59871	0.384541	0.14511	0.54033	0.0769424	0.41212	2.28194	0.377358
17	3	0	0	1.1982	1.28477	2.52646	0.46385	0.215258	0.553194	0.119135	0.578375	2.43164	0.464067	0.215358	0.883085	1.09422	1.16804	2.4981	0.598439	0.244776	0.820851	0.137329	0.519553	2.41633	0.409024	0.1673	0.997748	1.63963	1.73211	3.12111	0.464683	0.259727	0.450564	0.14076	0.827004	2.54781	0.558935	0.312408	0.902109	1.16387	1.24464	2.51585	0.3678	0.162372	0.440489	0.0858486	0.624839	2.3242	0.441468
17	4	0	0	0.0615019	0.0802468	0.227449	0.237696	0.0122661	2.61632	0.00696719	0.0612291	0.222881	0.051604	0.00266297	0.657624	0.0307534	0.0391518	0.121315	0.481636	0.011683	11.9624	0.00703861	0.0300833	0.120589	0.0242569	0.000588395	0.857044	0.0229976	0.0286406	0.113098	0.619893	0.0105935	20.7927	0.00607234	0.0182634	0.112081	0.0170892	0.000292042	0.884992	0.0192064	0.0249003	0.0764826	0.425192	0.00674567	15.4124	0.00387927	0.0186268	0.0763009	0.015865
17	1	0	0	0.201523	0.238691	0.992656	0.60524	0.0774798	2.7069	0.0443602	0.152388	0.985527	0.128015	0.0163878	0.989235	0.199042	0.227521	0.697366	0.649238	0.0716157	3.35582	0.0408326	0.139597	0.69311	0.110307	0.0121677	1.01781	0.3113	0.358138	1.20952	0.683987	0.121212	2.17994	0.0684607	0.233431	1.19594	0.177214	0.0314048	0.959127	0.105347	0.120636	0.311741	0.675025	0.0397097	6.59558	0.0228248	0.0774211	0.302477	0.058827
17	2	0	0	0.607696	0.644099	1.0727	0.370636	0.0792042	0.910325	0.0415717	0.342272	0.873528	0.213698	0.0456668	0.741778	0.879767	0.893185	1.28483	0.456442	0.0704757	1.63884	0.0390699	0.201046	0.856446	0.154402	0.02384	0.926847	0.312786	0.342397	0.790093	0.539198	0.0751833	2.15338	0.0418665	0.197996	0.781281	0.139435	0.0194422	0.983342	1.41133	1.42577	2.20564	0.34639	0.0701987	0.910545	0.0373963	0.275179	1.29642	0.202658
17	3	0	0	1.15789	1.23691	2.28592	0.490798	0.21373	0.611736	0.116008	0.626091	2.16814	0.435474	0.189637	0.855128	1.19506	1.27046	2.44993	0.558363	0.240998	0.724501	0.134969	0.628668	2.36097	0.431615	0.186292	0.915498	1.70257	1.78188	3.18751	0.447544	0.235517	0.457561	0.126714	0.753995	2.52842	0.526244	0.276933	0.842252	1.17688	1.26528	2.5585	0.357372	0.166216	0.40919	0.0885171	0.686551	2.40856	0.465105
17	4	0	0	0.0686587	0.112686	0.565986	0.108817	0.00973324	0.686976	0.00549616	0.0602695	0.565568	0.0894456	0.00800051	0.295529	0.0361206	0.0542424	0.316572	0.301605	0.0122175	4.29079	0.00704086	0.032309	0.314844	0.0405083	0.00164093	0.658067	0.0219613	0.0326859	0.190593	0.364387	0.00883047	8.77877	0.00515555	0.0176148	0.190086	0.0242337	0.000587274	0.636988	0.0374116	0.0654387	0.43303	0.146577	0.0078778	1.54585	0.00446524	0.0281728	0.431601	0.0537451
17	1	0	0	0.208365	0.246127	0.684419	0.615824	0.0807742	2.54962	0.0438639	0.152995	0.673837	0.131164	0.0172041	0.875224	0.189611	0.216857	0.544074	0.71182	0.0750006	3.79073	0.0420836	0.149793	0.538245	0.105365	0.0111017	0.972992	0.284075	0.32802	0.824244	0.715837	0.117546	2.43626	0.0656913	0.218302	0.806244	0.164207	0.026964	0.910655	0.0828976	0.0986005	0.263851	0.630153	0.0336822	6.84648	0.0195603	0.069883	0.258807	0.0534508
17	2	0	0	0.544363	0.577946	1.05799	0.405821	0.0788708	1.11325	0.0420492	0.263005	0.928745	0.194349	0.0377715	0.814725	0.600935	0.620481	1.08378	0.48208	0.0745666	1.71579	0.0410501	0.219899	0.905246	0.154677	0.023925	0.905691	0.349605	0.372341	0.739194	0.64392	0.0825867	2.90371	0.047765	0.194016	0.723231	0.128256	0.0164496	0.962152	1.27551	1.28813	1.75576	0.365545	0.0658215	1.08653	0.0352288	0.232213	1.00265	0.180064
17	3	0	0	1.14352	1.20876	2.23675	0.52884	0.207321	0.728672	0.111987	0.552632	2.21257	0.392029	0.153687	0.883908	1.06679	1.1324	2.5771	0.6412	0.243755	0.954735	0.137976	0.440004	2.54992	0.380155	0.144518	1.01645	1.82275	1.88931	3.39673	0.490828	0.244137	0.526248	0.130196	0.735969	2.68642	0.497398	0.247405	0.863073	1.1201	1.21436	2.25469	0.361715	0.169809	0.403867	0.0890074	0.74904	2.1314	0.469455
17	4	0	0	0.0477765	0.0721376	0.330021	0.16277	0.00880505	1.70821	0.0049987	0.0430316	0.328793	0.0540951	0.00292628	0.432694	0.0202492	0.0282294	0.15931	0.430898	0.00848268	12.6441	0.00490009	0.015481	0.15866	0.019686	0.00038754	0.788329	0.0200543	0.0316162	0.249509	0.3029	0.00740987	7.11262	0.00425649	0.0194003	0.2492	0.0244631	0.000598442	0.664355	0.0256452	0.0382872	0.175212	0.198718	0.00565431	3.97711	0.00321997	0.0236213	0.174397	0.0284539
18	1	0	0	0.170664	0.211983	0.769811	0.54912	0.0691302	2.37711	0.0376748	0.140693	0.767389	0.125893	0.015849	0.806802	0.149164	0.177187	0.565669	0.673595	0.0644951	3.89828	0.0357378	0.1334	0.561583	0.0957475	0.00916759	0.923942	0.17671	0.201692	0.599128	0.752825	0.0732851	4.28406	0.0405975	0.115115	0.589092	0.0973468	0.0094764	0.923878	0.166078	0.190073	0.560892	0.696605	0.0644749	4.12689	0.0353534	0.118993	0.547769	0.0925559
18	2	0	0	0.465504	0.492566	0.783555	0.501246	0.080841	1.72791	0.0449453	0.272287	0.663993	0.16128	0.0260113	0.809275	0.26057	0.287034	0.648231	0.606838	0.0731713	2.78393	0.0404757	0.179315	0.637111	0.120578	0.0145391	0.856424	0.236223	0.269219	0.626741	0.771959	0.0998531	3.41952	0.0572138	0.170569	0.605872	0.12935	0.0167315	0.879262	1.16861	1.18456	1.67887	0.436728	0.0847569	1.23863	0.0466521	0.295255	1.00153	0.194073
18	3	0	0	1.35404	1.40976	2.45093	0.418086	0.164248	0.565072	0.0872113	0.515999	2.08216	0.392857	0.154336	0.755702	1.2839	1.31988	2.21682	0.687477	0.210658	1.22761	0.115266	0.361716	1.85225	0.306422	0.0938945	0.837863	1.702	1.79124	3.32736	0.38721	0.216445	0.366199	0.114425	0.720215	2.81115	0.558986	0.312466	0.687533	1.39433	1.46439	2.73429	0.34118	0.152866	0.38904	0.0780998	0.711934	2.0972	0.448052
18	4	0	0	0.0442532	0.058783	0.235355	0.255498	0.00989835	3.83044	0.00574908	0.0329546	0.234268	0.0387414	0.00150089	0.663062	0.0231528	0.0303325	0.116865	0.388666	0.00762598	11.6208	0.00447377	0.0193393	0.115902	0.0196209	0.00038498	0.805747	0.0163202	0.019456	0.0720254	0.662094	0.00702173	35.5585	0.00399938	0.0133273	0.071565	0.0106053	0.000112473	0.881117	0.0347077	0.0499572	0.195685	0.133826	0.00481471	2.08088	0.00269343	0.0235163	0.195306	0.0359774
18	1	0	0	0.219475	0.263907	0.823042	0.484605	0.0711008	1.77485	0.0382064	0.144446	0.80434	0.146719	0.0215265	0.788248	0.209989	0.239764	0.762069	0.649731	0.0752727	3.06243	0.041103	0.140759	0.749114	0.115852	0.0134217	0.951595	0.238014	0.276715	0.80672	0.650385	0.0919004	2.50347	0.0499847	0.180963	0.798347	0.141302	0.0199661	0.91811	0.115985	0.133323	0.465527	0.629411	0.0414284	5.23694	0.0226885	0.0797961	0.458325	0.0658209
18	2	0	0	0.450147	0.483787	1.00115	0.491965	0.087284	1.53334	0.0482656	0.23256	0.968968	0.177419	0.0314776	0.946461	0.395119	0.443457	1.23559	0.492922	0.099336	1.38868	0.0563976	0.300819	1.22395	0.201525	0.0406122	0.989799	0.259847	0.301508	0.763106	0.694952	0.106378	2.56705	0.0601494	0.200441	0.755186	0.153073	0.0234314	1.01358	1.10794	1.12789	1.74123	0.345817	0.0730956	0.896428	0.0400502	0.314645	1.05873	0.211371
18	3	0	0	1.31763	1.37871	2.4848	0.463009	0.188104	0.609046	0.100524	0.513173	2.26562	0.406265	0.165051	0.797309	1.14726	1.21827	2.27266	0.5843	0.23972	0.779955	0.131283	0.597664	2.08797	0.410269	0.168321	0.910241	1.80774	1.8974	3.33816	0.387285	0.22346	0.356297	0.118618	0.855735	3.2463	0.57699	0.332918	0.749339	0.925942	0.997659	1.91993	0.32677	0.121501	0.454386	0.0628208	0.5514	1.77844	0.371825
18	4	0	0	0.0486239	0.0616269	0.192343	0.254314	0.00964196	3.85303	0.0055385	0.0392978	0.189725	0.0379136	0.00143744	0.653798	0.0252335	0.0304424	0.0946867	0.541673	0.00923681	19.2977	0.00561145	0.0228872	0.0943053	0.0170524	0.000290783	0.984535	0.0177632	0.0203769	0.0493534	0.704478	0.00704315	41.3278	0.00413088	0.0136017	0.0491236	0.00999769	9.99538e-05	0.959201	0.0374744	0.0453095	0.140236	0.242634	0.00618769	5.25221	0.00341581	0.0288227	0.137239	0.0255021
18	1	0	0	0.258675	0.314505	1.08315	0.535709	0.0959354	1.65896	0.053203	0.205931	1.07857	0.179081	0.0320701	0.827061	0.275819	0.306603	0.747491	0.72051	0.0965819	3.03074	0.0544579	0.171276	0.725924	0.134047	0.0179685	0.997205	0.301733	0.362026	1.03106	0.649966	0.130166	1.79499	0.0719912	0.24557	1.02086	0.200266	0.0401067	0.884795	0.163195	0.19249	0.628892	0.57357	0.0586126	3.06622	0.0320194	0.123797	0.619821	0.102189
18	2	0	0	0.501544	0.53376	0.937775	0.499986	0.0914053	1.49354	0.0499165	0.229307	0.879448	0.182816	0.0334216	0.905244	0.432732	0.467051	0.953403	0.670426	0.117933	2.11113	0.0653254	0.244532	0.936898	0.175907	0.0309433	1.02401	0.317639	0.365573	1.16737	0.659505	0.119471	2.05412	0.0674086	0.217712	1.15017	0.181153	0.0328163	0.941214	1.33661	1.34882	1.78464	0.422688	0.076623	1.26461	0.0415564	0.266977	0.948991	0.181276
18	3	0	0	1.53288	1.58534	2.69212	0.475264	0.192406	0.627739	0.102884	0.522706	2.25584	0.404841	0.163896	0.853792	1.34912	1.4239	2.60732	0.586255	0.267215	0.711822	0.147883	0.652899	2.36892	0.4558	0.207753	0.894189	1.984	2.06098	3.17819	0.450933	0.251866	0.421042	0.131353	0.879676	2.32346	0.558544	0.311971	0.769052	1.13165	1.21921	2.75526	0.342849	0.155691	0.390586	0.0805455	0.63524	2.52733	0.454111
18	4	0	0	0.0484067	0.0610325	0.187423	0.358817	0.0133528	5.50529	0.00762387	0.0402949	0.186676	0.0372132	0.00138483	0.80096	0.0264476	0.0314876	0.0902584	0.626096	0.0107104	21.532	0.00630109	0.0200555	0.0884065	0.0171067	0.000292639	0.975261	0.036417	0.0451664	0.147281	0.47204	0.0126256	10.1252	0.00724358	0.0251739	0.146306	0.0267469	0.000715398	0.867012	0.0218929	0.0279627	0.1049	0.382288	0.00665758	12.0487	0.0036542	0.0215536	0.10404	0.0174151
18	1	0	0	0.30407	0.351958	1.21738	0.556873	0.0988171	1.6919	0.0532754	0.200482	1.2057	0.17745	0.0314885	0.80933	0.303907	0.340058	0.898015	0.580943	0.0887415	2.11622	0.0493795	0.16968	0.881202	0.152754	0.0233338	0.865645	0.322174	0.379751	1.06377	0.619799	0.124744	1.67565	0.0678772	0.258845	1.05714	0.201266	0.040508	0.879943	0.205852	0.238778	0.606239	0.528451	0.0640128	2.34586	0.0344213	0.17459	0.597763	0.121133
18	2	0	0	0.463125	0.496261	0.885193	0.489881	0.0874149	1.50575	0.0479448	0.263046	0.867338	0.178441	0.0318412	0.944418	0.491057	0.513333	0.96768	0.693978	0.103887	2.65005	0.0593859	0.194323	0.886108	0.149698	0.0224094	1.07767	0.281351	0.33119	1.00015	0.633868	0.110841	2.05869	0.0629499	0.226433	0.998399	0.174865	0.0305777	0.978641	1.06697	1.08216	1.61475	0.445627	0.0805909	1.36333	0.0445892	0.22321	1.17879	0.180848
18	3	0	0	1.584	1.65549	3.30591	0.454991	0.21916	0.498907	0.115755	0.534566	2.89201	0.481681	0.232016	0.782832	1.41835	1.5159	3.23813	0.675976	0.361991	0.694342	0.199115	0.730289	3.09456	0.535508	0.286769	0.914454	1.83343	1.94765	3.75682	0.452344	0.297527	0.360712	0.156054	0.921984	3.23352	0.657745	0.432629	0.762792	1.31904	1.42401	2.86228	0.390593	0.209787	0.37298	0.107595	0.790893	2.58938	0.537098
18	4	0	0	0.0440558	0.0604057	0.213148	0.265213	0.0109746	3.66754	0.00628001	0.0347831	0.211207	0.0413802	0.00171232	0.700913	0.0222345	0.0272688	0.0793723	0.569554	0.00900286	20.9535	0.00523539	0.0174632	0.078225	0.0158069	0.000249857	0.973223	0.0232326	0.0279909	0.07734	0.607852	0.00950201	22.0823	0.00539609	0.0183936	0.0764985	0.0156321	0.000244363	0.855471	0.0265142	0.0365921	0.139593	0.250224	0.00631839	5.6452	0.00359943	0.0195517	0.138394	0.0252509
18	1	0	0	0.253027	0.305779	0.932781	0.567874	0.0976224	1.83177	0.0541336	0.173193	0.928585	0.171909	0.0295526	0.863253	0.247683	0.286066	0.708562	0.630916	0.090419	2.46553	0.0506392	0.179648	0.691437	0.143314	0.0205389	0.92401	0.264236	0.297834	0.706113	0.719263	0.0989661	2.87904	0.0545061	0.189241	0.689826	0.137594	0.0189321	0.90763	0.169846	0.197801	0.458935	0.645737	0.0655462	3.4983	0.0360447	0.1399	0.452933	0.101506
18	2	0	0	0.474406	0.512909	1.02997	0.456385	0.0890761	1.26391	0.0481476	0.295257	0.982404	0.195177	0.0380942	0.891143	0.427438	0.458367	0.885754	0.582135	0.0964548	1.97461	0.0542104	0.243054	0.822276	0.165691	0.0274537	0.978216	0.309679	0.359545	1.11936	0.657515	0.120238	2.05157	0.0686058	0.215434	1.11238	0.182868	0.0334406	0.926604	1.14863	1.16152	1.60494	0.431814	0.0745827	1.36918	0.0408456	0.217181	1.09909	0.17272
18	3	0	0	1.26102	1.35826	3.02396	0.411629	0.20792	0.432112	0.11025	0.663481	2.88134	0.505116	0.255142	0.799726	1.20437	1.29877	2.66309	0.480294	0.233662	0.542033	0.128288	0.562993	2.50362	0.486498	0.23668	0.839998	1.72657	1.84717	3.96139	0.342629	0.225129	0.276251	0.119266	0.966209	3.49662	0.657063	0.431732	0.761145	0.948821	1.06972	2.66054	0.270804	0.133891	0.285569	0.0698076	0.722513	2.4274	0.49442
18	4	0	0	0.0383487	0.0546191	0.205824	0.261307	0.0101741	3.84956	0.00583585	0.0335779	0.205107	0.0389356	0.00151598	0.666833	0.0232757	0.0289455	0.100504	0.567716	0.00977956	19.9536	0.00592105	0.0178936	0.0996422	0.0172261	0.00029674	0.983767	0.0217057	0.025673	0.0731783	0.725666	0.00995992	30.5045	0.00574649	0.0187391	0.0725754	0.0137252	0.000188382	0.998787	0.0251122	0.0383299	0.155648	0.196705	0.00570247	3.95411	0.00332311	0.0139653	0.155114	0.02899
19	1	0	0	0.107717	0.125482	0.301875	0.643002	0.0414537	5.65341	0.023497	0.0974298	0.290946	0.064469	0.00415626	0.84396	0.090581	0.108526	0.39576	0.640442	0.0383449	6.11945	0.0219365	0.0562579	0.389502	0.0598726	0.00358472	0.791952	0.115556	0.137445	0.349962	0.707469	0.0527342	5.43618	0.030204	0.100236	0.344877	0.0745393	0.0055561	0.869268	0.0629058	0.0752151	0.191144	0.665858	0.0275002	9.01814	0.0153825	0.0518865	0.188526	0.0413004
19	2	0	0	0.647015	0.687231	1.42955	0.336592	0.0780556	0.786139	0.0422765	0.295215	1.4023	0.2319	0.0537774	0.7757	0.56144	0.604266	1.22021	0.643328	0.143902	1.64082	0.0820969	0.329485	1.18927	0.223683	0.0500341	0.987066	0.240295	0.277646	0.949873	0.753518	0.104924	3.07781	0.0596762	0.179604	0.929419	0.139245	0.0193891	0.968267	1.28253	1.31144	2.14814	0.298668	0.0818825	0.581861	0.0437343	0.38684	1.43801	0.274158
19	3	0	0	1.43093	1.5398	3.08692	0.413209	0.235253	0.395488	0.128193	0.75286	2.96943	0.569331	0.324138	0.846471	1.4001	1.47665	2.50018	0.466708	0.219259	0.555354	0.122573	0.666533	2.09382	0.469798	0.22071	0.952418	2.11282	2.19373	3.98204	0.396909	0.234556	0.363433	0.126922	0.740983	2.79933	0.590958	0.349231	0.770137	0.41091	0.45673	0.973719	0.486119	0.0970346	1.32752	0.0528945	0.284703	0.936205	0.199611
19	4	0	0	0.0507403	0.0809825	0.352322	0.11792	0.00745076	1.11054	0.00443364	0.0478419	0.352047	0.0631848	0.00399232	0.36798	0.0197372	0.0270765	0.165233	0.370118	0.00686797	11.8809	0.00409095	0.0132369	0.164489	0.0185562	0.000344332	0.785164	0.0141823	0.0179062	0.0857119	0.578526	0.00633102	31.7568	0.00380309	0.0120289	0.0851138	0.0109434	0.000119757	0.954413	0.0332281	0.0567223	0.260989	0.122304	0.00562856	1.51562	0.00321	0.0244313	0.260503	0.0460211
19	1	0	0	0.0942719	0.120198	0.475472	0.406082	0.0303135	3.07407	0.01713	0.0913743	0.470816	0.0746486	0.00557241	0.829468	0.0778718	0.0926631	0.326176	0.560849	0.0281982	6.35906	0.0160748	0.0565086	0.323146	0.0502778	0.00252786	0.850609	0.0974689	0.114537	0.374309	0.637332	0.0383797	6.02703	0.0218562	0.0808565	0.371061	0.0602193	0.00362637	0.983114	0.0528997	0.0641974	0.238413	0.560019	0.020391	8.56438	0.0113544	0.0433878	0.234322	0.0364112
19	2	0	0	0.667208	0.695706	1.39277	0.454175	0.0895938	1.25805	0.048956	0.241502	1.18338	0.197267	0.0389143	0.873349	0.39333	0.451502	1.00237	0.552126	0.122515	1.40317	0.0690898	0.336566	0.972874	0.221897	0.0492383	1.00458	0.242059	0.279284	0.69459	0.765362	0.106723	3.10443	0.0603615	0.168104	0.690974	0.139441	0.0194437	1.00266	1.36231	1.38729	2.24559	0.34076	0.0893892	0.705578	0.0485532	0.352729	1.3992	0.262323
19	3	0	0	1.53691	1.61433	3.09396	0.475712	0.235192	0.521862	0.127559	0.590762	3.01725	0.4944	0.244431	0.835492	1.47866	1.55014	2.92922	0.485784	0.226255	0.569267	0.123488	0.64541	2.51919	0.465752	0.216925	0.907871	1.92618	2.01781	3.56058	0.39561	0.238055	0.350363	0.126865	0.923426	2.70221	0.601743	0.362094	0.761539	0.558869	0.659047	1.89763	0.401555	0.140399	0.610901	0.0746807	0.369063	1.87931	0.349638
19	4	0	0	0.0611407	0.0740768	0.249394	0.224343	0.00939572	3.11866	0.0054702	0.0439529	0.231855	0.0418811	0.00175402	0.578141	0.0177803	0.0252114	0.142265	0.42741	0.00764999	14.3032	0.00458212	0.0105269	0.14167	0.0178985	0.000320356	0.76758	0.0158279	0.0218948	0.115244	0.470194	0.00712295	18.5166	0.00424939	0.0103509	0.114987	0.015149	0.000229491	0.77509	0.0424238	0.0560163	0.264081	0.152662	0.00559199	2.35368	0.00315802	0.0321985	0.259663	0.0366297
19	1	0	0	0.0977555	0.120177	0.361089	0.400638	0.0280352	3.28712	0.016096	0.0737256	0.359162	0.0699764	0.00489669	0.811137	0.0626321	0.0732773	0.218213	0.567634	0.0216138	8.35353	0.0121114	0.0472478	0.214005	0.038077	0.00144986	0.896118	0.095854	0.117435	0.400687	0.497108	0.0337628	4.16724	0.0192231	0.0743781	0.399564	0.0679183	0.0046129	0.903871	0.0436022	0.0529442	0.18946	0.586336	0.0176277	11.0944	0.0100277	0.0323178	0.188798	0.0300642
19	2	0	0	0.616125	0.647249	1.3448	0.378996	0.0752199	1.02501	0.0403762	0.255521	1.1889	0.198472	0.0393911	0.841582	0.365527	0.413118	1.18162	0.560018	0.107899	1.6389	0.0608391	0.232923	1.15959	0.19267	0.0371218	1.03477	0.215298	0.244046	0.592384	0.74861	0.0861014	3.70892	0.0490632	0.166453	0.584907	0.115015	0.0132284	1.0352	1.31166	1.34157	2.03976	0.294688	0.0830878	0.558332	0.0443858	0.409071	1.43508	0.281952
19	3	0	0	1.13508	1.24008	2.56428	0.413246	0.206611	0.458945	0.114722	0.662635	2.51804	0.49997	0.24997	0.752499	1.24786	1.346	2.91621	0.405911	0.20504	0.446402	0.113905	0.622908	2.60372	0.505136	0.255162	0.863099	1.52841	1.62046	3.10528	0.340397	0.183479	0.339008	0.0984948	0.719666	2.48344	0.539016	0.290538	0.701127	0.52436	0.60532	1.8526	0.338255	0.102417	0.605756	0.0555331	0.385658	1.84648	0.30278
19	4	0	0	0.0398714	0.0588539	0.212967	0.191037	0.0082796	2.60641	0.00489581	0.0341324	0.211946	0.0433402	0.00187837	0.53384	0.0149852	0.0219069	0.115094	0.371239	0.00593918	13.6191	0.00348575	0.0128772	0.114691	0.0159983	0.000255945	0.698876	0.0122281	0.0149607	0.0584972	0.714074	0.00616208	48.1881	0.00358846	0.00902437	0.0578519	0.00862947	7.44678e-05	0.944621	0.0277323	0.0453049	0.180576	0.128423	0.00460608	2.03189	0.00261386	0.0253191	0.179998	0.0358666
19	1	0	0	0.130683	0.159263	0.468712	0.509426	0.0464196	3.08502	0.0256153	0.113634	0.461063	0.0911215	0.00830313	0.869251	0.116817	0.1393	0.512252	0.568364	0.0431724	4.11485	0.0237418	0.0907526	0.511088	0.0759591	0.00576979	0.925623	0.144336	0.170372	0.439313	0.654721	0.0593241	3.95645	0.0324829	0.131833	0.436471	0.0906097	0.00821011	0.936656	0.0640513	0.0782227	0.26497	0.587989	0.0264285	7.32159	0.0147915	0.0577536	0.263329	0.0449472
19	2	0	0	0.458921	0.497775	0.924763	0.348699	0.0672905	0.990434	0.0368835	0.300727	0.89086	0.192976	0.0372397	0.834534	0.431057	0.480955	1.01792	0.538233	0.114924	1.42021	0.0647486	0.326988	0.979718	0.213521	0.045591	1.02324	0.199417	0.222508	0.559549	0.831049	0.0821035	4.78711	0.0467245	0.142849	0.552831	0.0987951	0.00976047	1.02326	1.03575	1.05688	1.8555	0.281215	0.0591834	0.716	0.0317128	0.292505	1.2024	0.210456
19	3	0	0	1.25792	1.36738	2.9221	0.419661	0.225169	0.419727	0.120834	0.716544	2.75579	0.536551	0.287886	0.785893	1.39987	1.51951	3.13854	0.338794	0.200414	0.319735	0.111886	0.853617	3.05136	0.591551	0.349932	0.783467	1.63294	1.73654	3.16315	0.337628	0.19967	0.305821	0.106959	0.950457	2.56626	0.591392	0.349745	0.732557	0.497059	0.555267	1.32889	0.444203	0.110042	0.975505	0.0598668	0.326906	1.30145	0.24773
19	4	0	0	0.0263907	0.0376102	0.128587	0.247271	0.00663379	5.26185	0.00378719	0.0180796	0.128273	0.026828	0.000719744	0.625537	0.0162448	0.0255871	0.111986	0.303407	0.00600503	8.93174	0.00349878	0.0111907	0.111481	0.019792	0.000391724	0.548933	0.0135526	0.0168351	0.0475708	0.546067	0.00546017	31.4913	0.00314855	0.0100794	0.0466062	0.00999908	9.99817e-05	0.804459	0.0243881	0.0390244	0.148577	0.113669	0.003467	2.17847	0.00202664	0.0224478	0.148416	0.0305009
19	1	0	0	0.0666224	0.0826621	0.233996	0.534823	0.0262042	6.23534	0.0149686	0.0583617	0.233111	0.0489961	0.00240061	0.826539	0.0664173	0.0746697	0.25647	0.59906	0.0204673	9.96161	0.0116282	0.0337764	0.252466	0.0341658	0.0011673	0.866158	0.0931457	0.111292	0.321466	0.602246	0.0367281	5.59598	0.0208126	0.0697884	0.315603	0.0609852	0.0037192	0.762887	0.0433088	0.0504637	0.133908	0.719129	0.018651	15.3642	0.0103347	0.0368212	0.131078	0.0259355
19	2	0	0	0.657415	0.694689	1.51965	0.370095	0.0831606	0.899307	0.0454063	0.2255	1.35514	0.224701	0.0504904	0.74165	0.422431	0.47689	1.03794	0.522439	0.115724	1.31024	0.0642871	0.341256	1.02881	0.221506	0.049065	0.954554	0.246672	0.278087	0.840716	0.647854	0.0832577	2.83861	0.0468814	0.191005	0.825492	0.128513	0.0165156	1.005	1.31335	1.34194	2.43984	0.307491	0.0847885	0.593029	0.0450905	0.401395	1.69199	0.275743
19	3	0	0	0.957456	1.02425	1.94933	0.620767	0.226125	0.944344	0.125306	0.484988	1.83317	0.364267	0.132691	0.944615	1.17189	1.22343	2.13586	0.607661	0.213776	0.972549	0.120367	0.45607	1.86005	0.351802	0.123764	0.967616	1.38013	1.44232	2.58692	0.481127	0.201814	0.629345	0.110732	0.652599	2.06188	0.419462	0.175948	0.836571	0.490947	0.552446	1.35222	0.400024	0.101453	0.859363	0.0552758	0.350528	1.33076	0.253617
19	4	0	0	0.036109	0.0568321	0.244647	0.141814	0.00622935	1.91871	0.00370215	0.0267676	0.243651	0.0439261	0.0019295	0.443219	0.0129473	0.0196596	0.133435	0.307058	0.00454676	12.2004	0.00267507	0.00974078	0.133244	0.0148075	0.000219262	0.669728	0.0107262	0.0132512	0.0668178	0.637873	0.00496772	48.4263	0.00293716	0.00695533	0.0664999	0.00778795	6.06522e-05	1.01791	0.0293705	0.0486847	0.237768	0.096138	0.00373615	1.43339	0.00216482	0.0231729	0.236848	0.0388624
20	1	0	0	0.26717	0.297415	0.726842	0.664941	0.0869978	2.75933	0.0472339	0.155647	0.714537	0.130835	0.0171179	0.82912	0.345389	0.366201	0.681772	0.743582	0.0906007	3.41316	0.0506713	0.171901	0.662979	0.121844	0.0148459	0.935621	0.20899	0.246247	0.659022	0.61511	0.0802056	2.51607	0.0427786	0.141089	0.650457	0.130392	0.0170021	0.777768	0.244294	0.269618	0.581583	0.746122	0.0852239	3.62033	0.0472337	0.119524	0.56955	0.114223
20	2	0	0	0.597125	0.62126	1.07942	0.476323	0.0817815	1.5342	0.0452261	0.250812	0.863205	0.171693	0.0294786	0.934616	0.183461	0.202719	0.404465	0.717517	0.0619535	4.69468	0.0350004	0.127139	0.400818	0.0863443	0.00745534	0.980286	0.463876	0.505014	1.11051	0.549227	0.109787	1.52948	0.0611142	0.24383	1.0856	0.199894	0.0399574	0.923009	1.48481	1.49164	1.9398	0.555525	0.0792933	2.22348	0.0453001	0.176613	0.761258	0.142736
20	3	0	0	1.20964	1.28815	2.7762	0.466016	0.206618	0.565933	0.11125	0.498503	2.64298	0.44337	0.196577	0.686977	0.280046	0.316938	0.735755	0.650548	0.0966584	2.44912	0.0540668	0.195068	0.72216	0.14858	0.022076	0.941984	1.92155	2.04765	3.92443	0.39459	0.279492	0.293521	0.14726	1.12341	3.21464	0.70831	0.501703	0.702269	0.304595	0.330815	0.630975	0.469533	0.0606762	2.00546	0.0334903	0.178082	0.5969	0.129227
20	4	0	0	0.045671	0.0561989	0.180355	0.378659	0.0124155	6.71779	0.00722197	0.0382957	0.177613	0.032788	0.00107505	0.873519	0.0114516	0.0134348	0.0438321	0.782237	0.00550199	64.6098	0.0031964	0.00873937	0.0437283	0.00703366	4.94724e-05	0.979985	0.0304503	0.0365584	0.113897	0.591785	0.0119869	17.1806	0.00704889	0.0249856	0.113089	0.0202554	0.000410283	1.02269	0.0131422	0.0164947	0.052365	0.425104	0.00424246	24.3577	0.00242595	0.0105938	0.0520724	0.00997982
20	1	0	0	0.23861	0.25538	0.62585	0.665622	0.0606468	3.95388	0.0328235	0.105559	0.598943	0.091113	0.00830157	0.835678	0.318632	0.348254	0.815342	0.632425	0.08898	2.45581	0.0486141	0.191251	0.790347	0.140697	0.0197955	0.877597	0.13432	0.168251	0.498449	0.648596	0.0657871	3.5366	0.0363847	0.117698	0.494166	0.10143	0.010288	0.853179	0.155439	0.170278	0.445734	0.760616	0.0529346	6.07684	0.0294324	0.086839	0.427591	0.0695943
20	2	0	0	0.647988	0.680746	1.45251	0.482284	0.100757	1.27288	0.055556	0.30419	1.30688	0.208916	0.0436458	0.858728	0.197713	0.240606	0.912226	0.573125	0.0786916	2.38706	0.0450009	0.139507	0.901104	0.137303	0.018852	0.901324	0.977626	1.01983	1.69723	0.417999	0.121533	0.793271	0.0670592	0.427239	1.32263	0.290749	0.084535	0.768202	1.24784	1.26343	2.2875	0.500037	0.0990588	1.42568	0.0559506	0.213334	2.01411	0.198103
20	3	0	0	1.33555	1.44945	3.04381	0.454461	0.256298	0.424855	0.135126	0.700643	3.01598	0.56396	0.318051	0.663476	0.563117	0.598184	1.2756	0.653961	0.132143	1.84753	0.0754358	0.271494	1.25129	0.202066	0.0408306	0.900696	1.99563	2.15293	4.18498	0.439283	0.355323	0.283925	0.185764	1.29068	3.6831	0.80887	0.654271	0.703521	0.611244	0.648431	1.19166	0.478596	0.10372	1.16899	0.0549035	0.237412	1.09304	0.216718
20	4	0	0	0.0811169	0.111655	0.479448	0.245908	0.0188882	1.84497	0.0108849	0.0531044	0.477613	0.0768101	0.00589979	0.6194	0.0192998	0.0348004	0.244729	0.285	0.00826226	5.63332	0.00473447	0.0120798	0.244047	0.0289903	0.00084044	0.562453	0.0422998	0.0693579	0.459132	0.312559	0.017199	3.26954	0.0098999	0.0312673	0.455821	0.0550265	0.00302792	0.678627	0.0158499	0.0196047	0.0585448	0.473555	0.00546992	23.857	0.00318301	0.0139497	0.057635	0.0115508
20	1	0	0	0.341708	0.363287	0.729918	0.654482	0.080818	2.86023	0.0436136	0.186358	0.617222	0.123484	0.0152483	0.798161	0.409682	0.443861	0.903191	0.656205	0.112211	2.01651	0.0589645	0.274616	0.809765	0.170999	0.0292408	0.786789	0.181712	0.22348	0.791002	0.568471	0.074039	2.33979	0.03969	0.167496	0.790019	0.130242	0.016963	0.811308	0.19923	0.227722	0.581799	0.692592	0.0764763	3.50551	0.0427415	0.138441	0.574696	0.11042
20	2	0	0	0.679543	0.699696	1.08083	0.49667	0.0829096	1.61748	0.0450725	0.246638	0.776223	0.166931	0.0278659	0.871147	0.23158	0.261887	0.587459	0.552094	0.0676026	2.4855	0.0372663	0.173526	0.575756	0.122448	0.0149935	0.90513	0.535737	0.577641	1.06186	0.475441	0.102824	1.18445	0.0554003	0.277317	1.0406	0.21627	0.0467728	0.848704	1.44032	1.45365	2.10703	0.42777	0.084123	1.18696	0.0459034	0.210782	1.29999	0.196655
20	3	0	0	1.26215	1.34157	2.75034	0.4925	0.224238	0.569451	0.118049	0.602613	2.65181	0.455305	0.207303	0.72299	0.373821	0.419131	1.00049	0.512737	0.0973098	1.44268	0.051963	0.279753	0.984336	0.189785	0.0360183	0.82606	2.04352	2.18942	4.36323	0.388971	0.306063	0.259202	0.160481	1.31319	3.81827	0.786853	0.619137	0.692891	0.665393	0.696149	1.36887	0.506699	0.103817	1.31132	0.055049	0.266576	1.14137	0.20489
20	4	0	0	0.0464297	0.0613711	0.189037	0.336552	0.013521	5.02575	0.00811169	0.0499026	0.188364	0.0401749	0.00161403	0.795534	0.0160226	0.0190564	0.0647854	0.661334	0.00682939	37.0071	0.00394645	0.0122102	0.0637317	0.0103267	0.00010664	1.01203	0.0303131	0.0393632	0.156183	0.428653	0.0107751	10.2512	0.0064775	0.0273003	0.155216	0.0251372	0.000631879	0.921958	0.0133333	0.0172621	0.062085	0.413693	0.00454031	21.4429	0.00258284	0.0105538	0.0617732	0.0109751
20	1	0	0	0.281436	0.314892	0.74189	0.521183	0.0737239	2.00846	0.0401883	0.170489	0.728024	0.141455	0.0200095	0.690838	0.34783	0.380335	0.901307	0.600053	0.0924526	2.0546	0.0487739	0.211919	0.834699	0.154074	0.0237388	0.764962	0.166481	0.199532	0.564598	0.56936	0.0627147	2.7738	0.0336543	0.155103	0.559466	0.11015	0.0121329	0.797599	0.184254	0.209494	0.587766	0.786938	0.078566	4.42782	0.0441345	0.105796	0.580818	0.0998377
20	2	0	0	0.728384	0.759743	1.25195	0.471857	0.102052	1.21701	0.0569266	0.305043	1.21614	0.216277	0.0467757	0.913874	0.217836	0.253985	0.673875	0.610462	0.0798188	2.60883	0.0446004	0.15519	0.667708	0.130751	0.0170959	0.87914	1.10365	1.13782	2.01766	0.453541	0.125679	0.901258	0.0692055	0.359932	1.57579	0.277106	0.0767877	0.897753	1.31068	1.32587	1.84597	0.5117	0.102538	1.44056	0.0578462	0.259539	1.23358	0.200388
20	3	0	0	1.12429	1.24762	3.02851	0.440455	0.238496	0.44049	0.12915	0.654529	2.98292	0.541475	0.293195	0.727796	0.621444	0.657702	1.49159	0.675704	0.145679	1.76472	0.0820265	0.279839	1.37093	0.215595	0.0464814	0.983748	1.87097	2.04425	4.18547	0.362341	0.298781	0.231576	0.157458	1.21049	3.65053	0.824585	0.679941	0.722853	0.548617	0.569351	1.11371	0.55993	0.0853442	1.97507	0.0458841	0.194004	0.896866	0.152419
20	4	0	0	0.0368228	0.0484837	0.167213	0.296459	0.00935955	5.50206	0.00548411	0.0355794	0.166189	0.0315712	0.000996739	0.770522	0.0120235	0.0148263	0.0657064	0.591303	0.00513468	38.9217	0.00293493	0.00868799	0.0645812	0.00868366	7.5406e-05	0.878556	0.0347519	0.0452226	0.14597	0.355692	0.0103032	7.10104	0.00595827	0.029526	0.145538	0.0289667	0.000839069	0.832	0.0115587	0.0155973	0.0696055	0.356413	0.00373621	19.569	0.00215042	0.0086923	0.0689667	0.0104828
20	1	0	0	0.335682	0.361987	0.875722	0.547947	0.0743166	2.17469	0.040003	0.15775	0.836586	0.135627	0.0183948	0.724085	0.398118	0.433339	0.921285	0.611549	0.104774	1.86975	0.0548814	0.262001	0.828386	0.171325	0.0293523	0.839538	0.227	0.262512	0.77264	0.607304	0.0801645	2.48833	0.043357	0.171681	0.757441	0.132001	0.0174242	0.908042	0.189586	0.211426	0.541266	0.865424	0.0810842	5.26639	0.0462304	0.132565	0.535428	0.093693
20	2	0	0	0.720885	0.762167	1.11376	0.530547	0.131664	1.17608	0.0724307	0.345734	1.02082	0.248166	0.0615864	0.617749	0.332908	0.372909	0.79666	0.549646	0.092629	1.75689	0.0498967	0.238271	0.727453	0.168525	0.0284006	0.6102	1.16504	1.22136	2.14046	0.489565	0.180017	0.738749	0.0998861	0.461915	1.97646	0.367709	0.13521	0.701214	1.271	1.28611	1.72212	0.674088	0.132898	1.9643	0.0763501	0.272123	1.01073	0.197152
20	3	0	0	1.13853	1.20762	2.23471	0.526325	0.212196	0.700406	0.113846	0.488944	2.15903	0.403165	0.162542	0.741695	0.601531	0.640884	1.30681	0.645502	0.142934	1.62435	0.0796443	0.322795	1.22628	0.221431	0.0490316	0.869596	1.76751	1.92495	3.61177	0.346686	0.264712	0.238749	0.139192	1.34541	3.29068	0.763548	0.583006	0.677192	0.622403	0.662199	1.37805	0.375976	0.0851298	0.905842	0.0464402	0.317061	1.32575	0.226423
20	4	0	0	0.042284	0.0559056	0.190304	0.363679	0.0133148	5.85687	0.00785046	0.0403236	0.188865	0.0366113	0.00134038	0.850476	0.0131945	0.0207114	0.138	0.36516	0.0058359	12.8722	0.00328779	0.00882609	0.137646	0.0159818	0.000255418	0.707008	0.0367449	0.051028	0.278215	0.379124	0.0134382	6.18546	0.00777123	0.0321952	0.277913	0.0354453	0.00125637	0.821475	0.012464	0.0141863	0.0347022	0.595397	0.00403814	50.0852	0.00230387	0.00911964	0.0336298	0.00678226
21	1	0	0	0.402571	0.442292	1.01449	0.722665	0.132576	2.14935	0.0723374	0.246874	0.963467	0.183454	0.0336555	0.848696	0.458647	0.524349	1.25711	0.695097	0.176903	1.49731	0.0969815	0.381596	1.21012	0.254501	0.0647707	0.799271	0.312186	0.378922	0.868745	0.597797	0.128567	1.54721	0.0715652	0.316621	0.855257	0.215068	0.0462542	0.89447	0.134766	0.157967	0.4771	0.665113	0.0548914	4.47173	0.0304574	0.107119	0.471951	0.0825294
21	2	0	0	0.812235	0.855112	1.50501	0.470363	0.125917	0.940271	0.067384	0.350643	1.45072	0.267702	0.0716644	0.757575	0.805512	0.854241	1.91138	0.551246	0.156958	1.05399	0.0854499	0.356694	1.85781	0.284733	0.0810731	0.835385	0.361341	0.426788	1.42247	0.50662	0.1152	1.22044	0.0631031	0.262714	1.40726	0.227388	0.0517054	0.82541	1.33657	1.37786	2.29515	0.420978	0.141101	0.676025	0.075946	0.479372	1.79518	0.335175
21	3	0	0	1.14811	1.29501	3.89082	0.296281	0.177711	0.268974	0.096768	0.703075	3.87364	0.599807	0.359768	0.678283	1.47223	1.6099	4.06001	0.350851	0.228826	0.295233	0.125583	0.889247	3.79713	0.652203	0.425369	0.685725	1.07794	1.19372	3.10635	0.332537	0.170752	0.351696	0.0927293	0.687925	2.98808	0.513482	0.263663	0.715649	0.304325	0.387365	1.77813	0.397121	0.0952913	0.902154	0.0519448	0.239284	1.77538	0.239955
21	4	0	0	0.0566783	0.0693853	0.211911	0.359588	0.0144097	5.14703	0.00826518	0.042217	0.209397	0.0400727	0.00160582	0.797634	0.0282776	0.0334448	0.100182	0.58922	0.0105356	18.9015	0.00604315	0.020295	0.098445	0.0178806	0.000319717	0.951224	0.0372083	0.0428706	0.0976032	0.665277	0.0141836	17.7199	0.00805432	0.0303071	0.09609	0.0213198	0.000454536	0.919541	0.0225417	0.0268393	0.0840653	0.633517	0.00924017	25.5915	0.00544427	0.0180965	0.0831744	0.0145855
21	1	0	0	0.348661	0.385224	1.03797	0.645977	0.105945	2.14885	0.0578	0.212394	1.02634	0.164007	0.0268982	0.861766	0.397252	0.455322	1.15628	0.607524	0.135341	1.5161	0.0752422	0.312611	1.14643	0.222775	0.0496289	0.837273	0.286838	0.353199	1.03366	0.591915	0.122136	1.60562	0.0683619	0.301038	1.02261	0.206341	0.0425767	0.864277	0.145986	0.175662	0.507863	0.556843	0.0544693	3.10861	0.0297443	0.157673	0.500116	0.097818
21	2	0	0	0.75519	0.807776	1.72874	0.46018	0.132067	0.875233	0.0720871	0.39655	1.69964	0.28699	0.0823634	0.815437	0.724944	0.78885	1.60815	0.572148	0.178143	0.999217	0.096868	0.42596	1.55058	0.311358	0.0969438	0.841581	0.468323	0.54053	1.52079	0.57352	0.154956	1.1746	0.0857443	0.355328	1.50362	0.270183	0.072999	0.860518	1.28642	1.33109	2.37636	0.333598	0.114187	0.522497	0.061217	0.425879	1.94939	0.34229
21	3	0	0	1.00645	1.11551	2.99481	0.37035	0.178329	0.417649	0.0968354	0.354403	2.92789	0.481516	0.231858	0.699256	1.08059	1.15529	2.67734	0.478567	0.19577	0.643947	0.10776	0.48733	2.36569	0.409077	0.167344	0.848114	1.02652	1.16003	3.3717	0.350017	0.189295	0.356268	0.104202	0.659839	3.26303	0.540817	0.292484	0.770829	0.370978	0.466788	1.64842	0.359542	0.10196	0.695324	0.0559179	0.282381	1.64491	0.283584
21	4	0	0	0.0398419	0.0478726	0.162548	0.506392	0.0134544	11.2213	0.00792134	0.0313233	0.161206	0.0265691	0.000705917	0.9058	0.0251161	0.0317448	0.123825	0.562853	0.0109391	16.9389	0.00639826	0.0204596	0.12296	0.0194351	0.000377725	0.90045	0.0331435	0.0377705	0.112243	0.752941	0.0136534	24.2316	0.00796791	0.0243922	0.109443	0.0181335	0.000328823	1.03509	0.0198912	0.0231226	0.0554282	0.608758	0.00718471	28.8704	0.00402146	0.0168012	0.0549234	0.0118023
21	1	0	0	0.373628	0.427612	1.0643	0.575344	0.119815	1.49217	0.0647123	0.235376	1.04115	0.20825	0.043368	0.714777	0.43856	0.500676	1.18047	0.480086	0.116112	1.06817	0.062482	0.3823	1.14886	0.241856	0.0584944	0.755578	0.315227	0.396021	1.09574	0.464621	0.111524	1.05445	0.0607523	0.314259	1.09042	0.240031	0.057615	0.712089	0.135469	0.166503	0.474903	0.475511	0.0460926	2.60277	0.0244555	0.136858	0.46941	0.0969327
21	2	0	0	0.713965	0.764838	1.45117	0.391854	0.10759	0.772193	0.0582128	0.403447	1.39387	0.274566	0.0753864	0.863904	0.854374	0.90132	1.87774	0.464845	0.133592	0.893718	0.0738148	0.327163	1.70665	0.28739	0.0825929	0.829628	0.587132	0.645865	1.54352	0.470401	0.126718	0.939987	0.0682118	0.347111	1.531	0.269382	0.0725668	0.840107	1.16561	1.19226	2.00136	0.3196	0.0801985	0.682248	0.0429598	0.314289	1.44164	0.250934
21	3	0	0	0.910746	1.02013	3.19308	0.400577	0.184302	0.474307	0.100404	0.398983	3.12174	0.460092	0.211685	0.776984	1.15168	1.23898	3.27762	0.444265	0.203178	0.53929	0.112795	0.511215	3.06601	0.457334	0.209155	0.85085	0.930202	1.0453	2.75239	0.415613	0.198404	0.470662	0.107259	0.710231	2.55284	0.477378	0.227889	0.765325	0.382136	0.463026	1.53875	0.378723	0.0991335	0.768596	0.0526618	0.265891	1.52508	0.261757
21	4	0	0	0.0568117	0.0679973	0.167346	0.378558	0.0141599	5.60622	0.00784384	0.0510328	0.165583	0.0374049	0.00139913	0.786211	0.0303762	0.036391	0.130956	0.570799	0.0114512	16.3786	0.00659195	0.02358	0.130676	0.0200618	0.000402474	0.996087	0.0444174	0.0509972	0.151595	0.615723	0.0154446	13.7899	0.00867644	0.0278737	0.150477	0.0250836	0.000629187	1.01643	0.0158718	0.017972	0.0428557	0.59234	0.00499942	38.9476	0.00277445	0.0121563	0.0427301	0.00844011
21	1	0	0	0.294631	0.345122	1.05699	0.5153	0.0927419	1.55557	0.0503871	0.185696	1.05	0.179976	0.0323915	0.800107	0.357191	0.403396	0.992006	0.436155	0.0818769	1.25993	0.0444005	0.263035	0.985056	0.187725	0.0352405	0.779254	0.299396	0.353209	1.05012	0.529344	0.0993373	1.52222	0.0536074	0.244812	1.02121	0.187661	0.0352167	0.800851	0.122863	0.149888	0.479242	0.47931	0.0412083	3.07357	0.0227186	0.110585	0.468008	0.0859743
21	2	0	0	0.824332	0.86062	1.74667	0.437491	0.108282	0.953743	0.0584259	0.324655	1.6391	0.247507	0.0612596	0.810059	0.891308	0.928579	1.59463	0.525185	0.136908	1.10213	0.074897	0.35855	1.46813	0.260685	0.0679568	0.888165	0.847277	0.909146	2.25045	0.462592	0.152636	0.754607	0.0821557	0.369429	2.21788	0.329958	0.108872	0.817196	1.13543	1.16078	1.70065	0.380842	0.0919828	0.843909	0.0492287	0.323773	1.35687	0.241525
21	3	0	0	0.697553	0.772039	1.54313	0.460771	0.15265	0.753651	0.0827169	0.500473	1.51252	0.331293	0.109755	0.774255	0.975106	1.04948	1.92539	0.493431	0.191732	0.691116	0.104349	0.587822	1.78737	0.388569	0.150986	0.831218	0.777211	0.859935	1.81425	0.41085	0.151399	0.601816	0.0817226	0.477433	1.72342	0.368501	0.135793	0.75813	0.291966	0.352878	1.372	0.351362	0.0697289	0.959505	0.0377889	0.208918	1.33983	0.198453
21	4	0	0	0.0392516	0.048829	0.190925	0.476442	0.0138529	9.34023	0.00789618	0.0292524	0.190155	0.0290757	0.000845394	0.895364	0.0257155	0.0324036	0.114402	0.496396	0.0097973	14.3092	0.00557407	0.0240029	0.112658	0.0197369	0.000389544	0.88085	0.0319862	0.0436891	0.260744	0.491554	0.0146441	9.47186	0.0084065	0.0260005	0.26026	0.0297913	0.000887524	0.8517	0.016507	0.0222826	0.123109	0.463366	0.00694299	17.3956	0.00390556	0.0125647	0.122674	0.0149838
21	1	0	0	0.278416	0.313481	0.843545	0.627548	0.0905027	2.43766	0.0506994	0.14516	0.82681	0.144216	0.0207984	0.826261	0.35536	0.409023	1.03199	0.594694	0.120571	1.66508	0.068444	0.276804	0.982713	0.202745	0.0411055	0.812232	0.189851	0.240511	0.645205	0.546221	0.0807374	2.08298	0.0455091	0.220349	0.642856	0.147811	0.0218481	0.871145	0.134766	0.16233	0.458491	0.593259	0.0537433	3.65298	0.0299783	0.137997	0.456908	0.0905899
21	2	0	0	0.733824	0.784205	1.52363	0.435652	0.120646	0.868861	0.0666348	0.406848	1.49929	0.276933	0.0766921	0.818956	1.0203	1.06569	2.00639	0.508293	0.156627	0.917302	0.0871	0.45137	1.7819	0.308143	0.0949524	0.846383	0.6115	0.66484	1.42652	0.487059	0.127261	1.03025	0.0703343	0.316781	1.37645	0.261284	0.0682693	0.868609	0.954137	0.982718	1.8715	0.399975	0.0942367	0.903032	0.0501277	0.230792	1.37579	0.235607
21	3	0	0	1.18367	1.29053	3.05269	0.442899	0.227937	0.465072	0.12318	0.541424	3.04367	0.514648	0.264863	0.791632	1.457	1.54953	3.1991	0.517073	0.272963	0.533557	0.148691	0.63306	2.97338	0.5279	0.278678	0.837694	1.10201	1.22335	3.25019	0.396397	0.210754	0.407235	0.115116	0.694835	3.07022	0.531675	0.282678	0.79186	0.454927	0.588995	2.30232	0.339123	0.126984	0.493452	0.0691871	0.383807	2.29931	0.374447
21	4	0	0	0.0528072	0.0668903	0.212904	0.344183	0.0141481	4.90896	0.00829479	0.0525905	0.210068	0.0411062	0.00168972	0.818657	0.0222519	0.0291652	0.13665	0.59512	0.0112335	17.8961	0.00637647	0.0170534	0.135391	0.018876	0.000356305	0.95681	0.0281065	0.0350661	0.134376	0.61693	0.0129511	17.0359	0.00750776	0.0206196	0.13371	0.0209929	0.000440702	0.932019	0.0188494	0.0224015	0.061417	0.566305	0.00686318	26.912	0.00395273	0.0156747	0.0609446	0.0121192
22	1	0	0	0.49998	0.56448	1.39773	0.532338	0.139648	1.07515	0.0739886	0.287904	1.34173	0.26233	0.068817	0.752579	0.427483	0.516393	1.4926	0.545052	0.158079	1.04081	0.0875481	0.37274	1.44653	0.290026	0.0841151	0.823089	0.44611	0.52318	1.271	0.583884	0.159772	1.1765	0.0880928	0.422636	1.2499	0.273637	0.074877	0.860884	0.153019	0.189038	0.726238	0.601831	0.0668796	2.95601	0.0365044	0.138212	0.720157	0.111127
22	2	0	0	0.671188	0.703463	1.2233	0.33637	0.0709288	0.855138	0.0380231	0.30196	0.99534	0.210865	0.0444642	0.735687	0.698157	0.756175	1.46319	0.364805	0.106085	0.690703	0.0584085	0.429011	1.41155	0.290798	0.0845637	0.804731	0.271196	0.302515	0.748794	0.694609	0.0932116	2.97153	0.0535104	0.194292	0.726934	0.134193	0.0180077	1.05962	1.46623	1.49681	2.40179	0.237981	0.0717112	0.425726	0.0386562	0.406133	1.57247	0.301331
22	3	0	0	1.95568	2.05928	4.47161	0.481047	0.310605	0.396226	0.16519	0.746095	3.86109	0.645684	0.416908	0.772401	1.98392	2.04557	3.519	0.539313	0.26911	0.602373	0.149983	0.645718	2.78347	0.498986	0.248987	0.883544	2.89865	2.99705	4.71862	0.477558	0.364153	0.334515	0.194505	1.09979	3.55374	0.762532	0.581455	0.825368	0.487601	0.550229	1.28264	0.551041	0.140647	1.13913	0.0742101	0.309508	1.27178	0.255238
22	4	0	0	0.0805397	0.10182	0.316475	0.170797	0.0106526	1.65728	0.0064469	0.0777975	0.315041	0.0623702	0.00389005	0.565287	0.0198544	0.0249627	0.103275	0.562248	0.00851766	21.5782	0.00495221	0.0180056	0.102498	0.0151493	0.0002295	0.908023	0.0294704	0.0355596	0.142811	0.538797	0.0107348	16.2578	0.00645352	0.0230011	0.141122	0.0199236	0.000396949	0.991129	0.0178012	0.020564	0.0546954	0.403985	0.0041642	22.5216	0.00239294	0.0115299	0.0540716	0.0103078
22	1	0	0	0.272231	0.30937	1.02829	0.557534	0.0820315	2.01728	0.0436702	0.159196	1.01327	0.147133	0.0216481	0.785405	0.226152	0.280825	1.12468	0.528797	0.0881361	1.7846	0.049576	0.19983	1.11889	0.166673	0.0277799	0.888624	0.284232	0.345577	1.18172	0.515975	0.101532	1.44514	0.0559579	0.309179	1.17444	0.196778	0.0387214	0.842402	0.108689	0.131715	0.395817	0.550989	0.0410395	4.04523	0.022442	0.103245	0.392778	0.0744834
22	2	0	0	0.61043	0.641546	1.07693	0.376626	0.0744072	1.03042	0.0402182	0.286002	0.94581	0.197563	0.039031	0.762095	0.611617	0.670241	1.61018	0.354595	0.0972996	0.710838	0.0535213	0.467635	1.5241	0.274396	0.0752932	0.771678	0.224174	0.260635	0.879508	0.621133	0.082661	2.65168	0.0469628	0.15757	0.87416	0.133081	0.0177106	1.02793	1.4975	1.51446	2.08407	0.281884	0.0637746	0.663929	0.0339841	0.315782	1.25968	0.226244
22	3	0	0	1.89863	2.07058	4.23063	0.387271	0.320277	0.245826	0.168131	1.02097	4.17353	0.82701	0.683946	0.719789	1.90487	2.02671	4.27103	0.380797	0.263827	0.298515	0.143291	0.875419	4.21896	0.69283	0.480013	0.761369	2.63678	2.84763	4.99226	0.37019	0.398508	0.180787	0.209504	1.65967	4.74215	1.0765	1.15884	0.712615	0.613694	0.74715	2.13171	0.421515	0.17982	0.532498	0.0969102	0.442077	2.11874	0.426605
22	4	0	0	0.0713765	0.0917662	0.30662	0.20737	0.0119736	2.14889	0.00716428	0.070351	0.304957	0.0577403	0.00333394	0.663259	0.0249124	0.0301377	0.100377	0.570954	0.0096945	20.3578	0.00586919	0.0193018	0.0999912	0.0169795	0.000288302	1.0301	0.0371109	0.0439351	0.146459	0.567354	0.0133578	14.4974	0.00803624	0.0291333	0.146148	0.0235441	0.000554324	1.06136	0.0184631	0.0224147	0.0644889	0.406388	0.00517081	18.321	0.00296609	0.0176919	0.0634692	0.0127238
22	1	0	0	0.320292	0.354846	0.845239	0.565053	0.086384	1.99628	0.0466561	0.209758	0.838631	0.152878	0.0233716	0.866475	0.303306	0.347278	0.934547	0.675951	0.114434	2.21085	0.0633634	0.202518	0.90993	0.169293	0.0286602	0.938932	0.399912	0.442186	1.09756	0.643741	0.12157	1.88992	0.0674021	0.21071	1.05848	0.188849	0.0356639	0.907312	0.167024	0.210473	0.692786	0.584253	0.0748934	2.59493	0.0426393	0.149124	0.685641	0.128187
22	2	0	0	0.660034	0.702562	1.35152	0.377803	0.0910436	0.855587	0.0496857	0.288688	1.30888	0.240981	0.058072	0.790892	0.712759	0.775257	1.9575	0.443277	0.135323	0.785471	0.0732024	0.367534	1.87428	0.30528	0.0931956	0.795993	0.289399	0.333581	0.874996	0.582756	0.0967839	1.95605	0.0539526	0.211408	0.86317	0.16608	0.0275824	0.883692	1.44145	1.47108	2.25517	0.301286	0.0886048	0.555104	0.0480099	0.379057	1.59941	0.294089
22	3	0	0	2.00464	2.1334	4.16311	0.394416	0.288252	0.28478	0.152106	0.96486	3.70991	0.730833	0.534117	0.723523	2.05564	2.162	3.78518	0.446351	0.299311	0.369843	0.166306	1.02406	3.14258	0.670572	0.449667	0.783951	2.63835	2.80757	4.47803	0.382068	0.367216	0.211451	0.195331	1.63755	3.74767	0.961127	0.923766	0.677264	0.655131	0.793313	2.33386	0.439026	0.196649	0.516302	0.103587	0.50803	2.31892	0.447921
22	4	0	0	0.0530252	0.0645899	0.177749	0.253146	0.00934679	4.19615	0.0057205	0.0546836	0.175326	0.0369225	0.00136327	0.79794	0.0205302	0.023671	0.0694053	0.689718	0.00813589	34.2669	0.00476805	0.014271	0.0679195	0.011796	0.000139145	1.04762	0.0238546	0.0267201	0.0660429	0.783409	0.00944168	38.5858	0.00560465	0.0172713	0.0654232	0.012052	0.000145251	1.13676	0.016797	0.0210246	0.0640409	0.372455	0.00471503	16.6608	0.00267004	0.0155952	0.0636058	0.0126593
22	1	0	0	0.518093	0.577867	1.55005	0.530817	0.136012	1.09716	0.0720334	0.240881	1.47464	0.256232	0.0656546	0.758466	0.535763	0.620072	1.65966	0.558163	0.174431	0.979207	0.095631	0.393217	1.64356	0.312509	0.0976618	0.858591	0.460522	0.53728	1.48073	0.644599	0.178587	1.29879	0.0996915	0.381271	1.47803	0.277051	0.0767572	0.895476	0.207134	0.26781	1.06178	0.572684	0.0973244	1.84394	0.053255	0.14134	1.05269	0.169944
22	2	0	0	0.704572	0.740641	1.46967	0.344666	0.0787611	0.823601	0.0430074	0.331487	1.24709	0.228514	0.0522188	0.784693	0.627364	0.700226	1.54287	0.345439	0.107531	0.598062	0.0579524	0.450653	1.51105	0.311288	0.0969004	0.770767	0.264737	0.329474	1.62323	0.492999	0.0967774	1.39422	0.0537263	0.173634	1.61226	0.196303	0.038535	0.868671	1.41988	1.44771	2.30846	0.294211	0.0831927	0.559247	0.0447154	0.33279	1.8931	0.282766
22	3	0	0	1.80889	1.98953	5.1682	0.370438	0.307196	0.238133	0.163765	0.868456	5.06562	0.82928	0.687705	0.716384	1.60769	1.75651	5.13682	0.383729	0.271819	0.300511	0.15079	0.798904	4.99403	0.708362	0.501777	0.741684	2.589	2.76796	5.77586	0.413675	0.405487	0.224799	0.215988	1.34119	5.58579	0.980207	0.960807	0.796071	0.448188	0.560444	2.17324	0.468097	0.157685	0.742822	0.084293	0.359111	2.16317	0.336863
22	4	0	0	0.0636293	0.0815388	0.238941	0.212446	0.0108449	2.52361	0.00657617	0.0646254	0.235774	0.0510476	0.00260586	0.673014	0.019523	0.0232582	0.0807186	0.695235	0.00879859	32.3582	0.00518259	0.0161739	0.0805216	0.0126556	0.000160163	1.00237	0.0219084	0.0249001	0.078048	0.809489	0.00959025	40.4936	0.00568361	0.0157774	0.0761696	0.0118473	0.000140358	1.05379	0.0137087	0.0160883	0.0436849	0.56022	0.00472278	38.4318	0.0027313	0.0111555	0.0431414	0.00843023
22	1	0	0	0.391743	0.45797	1.65172	0.470507	0.111734	1.07805	0.0607969	0.212973	1.63085	0.237476	0.0563951	0.775094	0.457893	0.52213	1.53737	0.645835	0.162218	1.43923	0.0907995	0.300708	1.49996	0.251176	0.0630891	0.95462	0.361747	0.421914	1.10623	0.693023	0.150646	1.80427	0.0852551	0.26519	1.09999	0.217375	0.0472519	0.921952	0.128474	0.167988	0.695155	0.524067	0.0567828	2.61419	0.0306899	0.0827345	0.689632	0.10835
22	2	0	0	0.689995	0.755742	2.37064	0.273486	0.0844045	0.477243	0.0454569	0.304678	2.10858	0.308624	0.0952489	0.664245	0.708121	0.77265	2.07867	0.406386	0.12575	0.714604	0.0684229	0.381312	2.00455	0.309434	0.0957495	0.790122	0.357456	0.511843	2.78291	0.296966	0.108904	0.444369	0.059761	0.216299	2.76949	0.366722	0.134485	0.637549	1.29162	1.33976	2.36676	0.196798	0.0701172	0.293011	0.0371955	0.553033	1.67953	0.35629
22	3	0	0	2.11888	2.22446	4.17346	0.462187	0.313335	0.361942	0.16635	0.832357	3.81558	0.677941	0.459604	0.751732	1.97677	2.07744	3.6746	0.478362	0.305936	0.406795	0.166388	0.932679	3.487	0.639549	0.409023	0.782545	2.82103	3.01875	5.26111	0.396684	0.426721	0.195028	0.225681	1.72093	5.13051	1.07572	1.15717	0.723413	0.547952	0.672757	2.63378	0.47568	0.185874	0.647918	0.09893	0.468088	2.62642	0.390755
22	4	0	0	0.0784015	0.107529	0.413806	0.212787	0.0156776	1.771	0.00961355	0.0543852	0.41038	0.0736771	0.00542832	0.609473	0.0261128	0.0334784	0.132087	0.554596	0.0116326	16.4025	0.00721622	0.0155794	0.130055	0.0209749	0.000439946	0.958553	0.0330936	0.0442966	0.196788	0.473944	0.0139714	9.84529	0.00855571	0.0210841	0.194422	0.0294791	0.000869016	0.989251	0.0213665	0.0267819	0.0915254	0.443092	0.00716313	15.6594	0.00409254	0.0148295	0.0911847	0.0161662
23	1	0	0	0.335861	0.365255	0.802559	0.595951	0.0856573	2.23432	0.0461587	0.170128	0.769204	0.143732	0.0206589	0.776481	0.378961	0.406898	0.848032	0.643448	0.0954562	2.3207	0.051074	0.179386	0.724625	0.148351	0.022008	0.85116	0.407083	0.442831	0.935552	0.781661	0.136415	2.58577	0.0787546	0.253648	0.915401	0.174519	0.0304569	0.974987	0.0950377	0.119524	0.525654	0.552258	0.0400777	4.15544	0.0218846	0.0700107	0.518346	0.0725706
23	2	0	0	0.447171	0.491665	1.18114	0.49482	0.101225	1.32552	0.055471	0.269436	1.15107	0.204569	0.0418483	0.920687	0.958043	0.986534	1.60074	0.471731	0.111137	1.0943	0.060739	0.274616	1.47949	0.235595	0.0555048	0.934167	0.183686	0.2235	1.07931	0.597157	0.0761025	2.69322	0.0437413	0.11927	1.07616	0.127441	0.0162413	0.996685	0.55726	0.580661	0.948064	0.504794	0.0824495	1.6615	0.0443249	0.20507	0.819034	0.163333
23	3	0	0	1.2538	1.32961	2.73139	0.502347	0.222539	0.610414	0.119792	0.608772	2.61616	0.442998	0.196247	0.874771	1.72493	1.76395	2.76107	0.559032	0.206465	0.843484	0.115053	0.489691	2.39495	0.369326	0.136402	0.96333	1.8314	1.90983	3.23426	0.387393	0.210064	0.387712	0.114001	0.823648	2.83339	0.54225	0.294035	0.802066	0.684347	0.78031	2.41642	0.45607	0.171156	0.661627	0.0931826	0.442776	2.26905	0.375284
23	4	0	0	0.0702107	0.0918381	0.280125	0.195524	0.0115894	2.0148	0.00707875	0.0551692	0.276402	0.0592738	0.00351338	0.599673	0.0363157	0.0518085	0.227549	0.31585	0.0116851	5.01833	0.00686846	0.0293902	0.226481	0.0369956	0.00136867	0.695904	0.025089	0.0351757	0.220078	0.375819	0.00927729	9.08641	0.00553703	0.0191515	0.219138	0.0246855	0.000609375	0.778563	0.0288243	0.0407442	0.191686	0.236785	0.00682704	4.75131	0.00394974	0.0207151	0.190156	0.0288322
23	1	0	0	0.357195	0.394132	0.985163	0.58418	0.0974382	1.91421	0.0532543	0.187336	0.967561	0.166795	0.0278205	0.771828	0.367942	0.397081	0.816296	0.715626	0.106979	2.65158	0.0592551	0.177572	0.803443	0.149489	0.0223471	0.870065	0.400161	0.448625	1.27134	0.652378	0.132477	1.8016	0.074292	0.235596	1.25638	0.203068	0.0412367	0.896504	0.0897851	0.108051	0.421937	0.61322	0.0369081	5.72258	0.0207302	0.0674329	0.420212	0.0601874
23	2	0	0	0.501072	0.542756	1.32089	0.579424	0.121	1.53528	0.0669525	0.261412	1.24681	0.208828	0.0436092	0.895737	1.05216	1.07624	2.01436	0.688403	0.156031	1.74308	0.0895482	0.256536	1.89654	0.226657	0.0513734	0.909507	0.221503	0.265701	0.889458	0.691965	0.101656	2.64836	0.0571581	0.181132	0.884749	0.14691	0.0215824	0.924835	0.71771	0.800115	1.95789	0.524296	0.185634	0.85023	0.106585	0.443565	1.91949	0.354063
23	3	0	0	1.04573	1.16933	3.09325	0.546212	0.286054	0.558624	0.153213	0.659564	3.01508	0.523706	0.274268	0.841458	1.18092	1.24239	2.48462	0.552905	0.213582	0.79778	0.119045	0.534919	2.31335	0.386291	0.149221	0.987391	1.67272	1.79841	3.31048	0.44596	0.294824	0.372707	0.162892	0.815021	3.27394	0.661099	0.437052	0.878118	0.705123	0.920898	3.78381	0.38152	0.226188	0.339825	0.119443	0.518521	3.75977	0.59286
23	4	0	0	0.0608916	0.0781567	0.232973	0.229396	0.0112505	2.84798	0.00685027	0.0608069	0.230911	0.0490439	0.0024053	0.773329	0.0273848	0.0356857	0.137643	0.359558	0.00823494	9.35707	0.00490822	0.0222276	0.137134	0.022903	0.000524547	0.857868	0.0238312	0.0297083	0.145392	0.578593	0.0102733	19.7816	0.0062364	0.0199218	0.143977	0.0177556	0.000315262	1.03298	0.0185353	0.0249158	0.108573	0.277709	0.00462846	9.71442	0.00269842	0.0149763	0.108265	0.0166666
23	1	0	0	0.334597	0.378614	1.07855	0.538291	0.0954347	1.61811	0.0508611	0.197811	1.06239	0.177292	0.0314324	0.836455	0.35282	0.393876	1.03737	0.689639	0.120823	2.16378	0.0664148	0.246586	1.01865	0.175197	0.0306939	0.981626	0.412227	0.460322	1.1925	0.717671	0.147108	1.91225	0.0803463	0.285573	1.18235	0.20498	0.0420167	0.994333	0.105773	0.121413	0.395299	0.644028	0.0384134	6.00511	0.0213637	0.0749504	0.389116	0.0596455
23	2	0	0	0.47959	0.530743	1.18546	0.50329	0.114525	1.22513	0.063437	0.316848	1.16229	0.227552	0.05178	0.949613	0.917778	0.948694	2.01779	0.61319	0.147438	1.45104	0.0838891	0.301517	1.79048	0.240444	0.0578131	0.969827	0.264723	0.324486	1.17974	0.589636	0.110751	1.81843	0.0641544	0.213276	1.17656	0.18783	0.0352801	1.02066	0.826589	0.898491	2.13684	0.552161	0.194649	0.899417	0.111772	0.453854	2.09479	0.352522
23	3	0	0	1.25804	1.34837	2.5233	0.598511	0.290739	0.669538	0.157993	0.676886	2.39923	0.48577	0.235972	0.834899	1.33903	1.39655	2.41998	0.576363	0.228904	0.808682	0.127553	0.53737	1.95759	0.397152	0.15773	0.914791	1.84466	1.93377	3.29299	0.524109	0.304459	0.489414	0.165154	1.00795	2.68958	0.580908	0.337454	0.839219	0.774141	0.938834	2.8068	0.42051	0.223611	0.428133	0.121064	0.541555	2.74968	0.531763
23	4	0	0	0.0559367	0.0710361	0.197843	0.251699	0.011034	3.43527	0.00660184	0.0556838	0.196208	0.0438381	0.00192178	0.749105	0.0236857	0.0285596	0.0789405	0.534274	0.00853578	20.0879	0.00512735	0.0202837	0.0776892	0.0159764	0.000255245	0.938565	0.0261031	0.0306378	0.0768723	0.634512	0.0101901	23.6054	0.00608823	0.0223435	0.0758915	0.0160598	0.000257917	0.981065	0.0188329	0.0229833	0.0582653	0.386339	0.00509563	16.8476	0.00293089	0.0187762	0.0571367	0.0131895
23	1	0	0	0.276639	0.319579	0.874274	0.503144	0.0805847	1.67374	0.0429346	0.164221	0.867569	0.160162	0.025652	0.760936	0.314816	0.344917	0.746498	0.652521	0.0920441	2.54023	0.0505448	0.181003	0.735271	0.141059	0.0198977	0.964255	0.350194	0.39866	1.11094	0.637593	0.121587	1.81953	0.066168	0.224397	1.09522	0.190697	0.0363654	0.939479	0.0753791	0.0869684	0.24156	0.678686	0.0294677	8.6232	0.0162563	0.0645624	0.23921	0.0434187
23	2	0	0	0.478459	0.521314	1.04002	0.488969	0.101312	1.30848	0.0561725	0.303358	1.01089	0.207195	0.0429297	0.846169	1.01235	1.03041	1.53694	0.596757	0.114725	1.73825	0.0642443	0.255055	1.13933	0.192248	0.0369591	0.965175	0.195999	0.241335	1.04145	0.64581	0.0910245	2.5909	0.0514706	0.139924	1.0379	0.140946	0.0198659	0.991155	0.768316	0.794532	1.62047	0.546946	0.110818	1.49744	0.0614731	0.263502	1.55746	0.202613
23	3	0	0	1.15412	1.24705	2.41706	0.451625	0.213519	0.512298	0.114509	0.730486	2.33158	0.472779	0.22352	0.868321	1.62719	1.66729	2.54756	0.559771	0.203643	0.847564	0.112173	0.462751	1.94877	0.363796	0.132348	0.915983	1.8886	1.94881	3.2086	0.524104	0.252147	0.587945	0.136085	0.715806	2.55374	0.481101	0.231458	0.890791	0.740065	0.859362	2.49683	0.397033	0.173576	0.481725	0.092071	0.568552	2.46867	0.437181
23	4	0	0	0.0739106	0.0978829	0.308608	0.192386	0.0123577	1.76985	0.00730238	0.0756748	0.307159	0.0642338	0.00412599	0.651705	0.038409	0.0480437	0.182234	0.409898	0.011841	8.30939	0.00693422	0.034842	0.179975	0.0288878	0.000834503	0.947654	0.0370198	0.045142	0.152576	0.499672	0.01292	11.6047	0.0077587	0.0258276	0.151088	0.025857	0.000668585	1.0301	0.0240922	0.0288739	0.0861423	0.419896	0.00668862	14.8656	0.00377201	0.021304	0.0856638	0.0159293
23	1	0	0	0.328824	0.388635	1.29267	0.469359	0.0973219	1.19137	0.0512222	0.217512	1.28765	0.207351	0.0429944	0.769331	0.329566	0.373389	1.20581	0.53756	0.0944409	1.67541	0.0517115	0.189686	1.19428	0.175684	0.030865	0.860209	0.443697	0.497657	1.25965	0.657645	0.148362	1.59398	0.0811235	0.271054	1.24646	0.225596	0.0508936	0.89548	0.10115	0.126192	0.410536	0.553535	0.0418055	3.98059	0.0227051	0.0853432	0.40715	0.0755246
23	2	0	0	0.584978	0.630521	1.34056	0.51325	0.120892	1.24679	0.0691719	0.310746	1.33804	0.235542	0.0554801	0.809638	1.05611	1.08187	1.66657	0.591179	0.1389	1.39814	0.0771822	0.321416	1.43381	0.234954	0.0552034	0.87079	0.247777	0.304022	1.03811	0.617845	0.108967	2.00345	0.0623169	0.160954	1.03473	0.176366	0.0311048	0.846803	0.813562	0.849647	1.40438	0.500228	0.122683	1.13	0.0679693	0.36783	1.31823	0.245255
23	3	0	0	1.31434	1.35729	2.32837	0.465145	0.158159	0.739023	0.0854412	0.344784	1.82879	0.34002	0.115614	0.586859	1.61047	1.62991	2.34262	0.681409	0.171658	1.47669	0.0937136	0.376102	1.23014	0.251917	0.063462	0.628995	1.99084	2.03336	2.75643	0.439107	0.182318	0.564069	0.0972412	0.635722	1.67675	0.415202	0.172392	0.57688	0.661155	0.715134	1.29647	0.437412	0.119662	0.884223	0.0661752	0.47308	1.18043	0.273569
23	4	0	0	0.058889	0.0806233	0.337577	0.175749	0.0096868	1.88974	0.00574088	0.0517062	0.335385	0.0551173	0.00303792	0.464787	0.0268441	0.0340206	0.111533	0.408141	0.00853804	11.4481	0.00500992	0.0258299	0.110447	0.0209193	0.000437619	0.895976	0.0218559	0.0283196	0.122501	0.417105	0.00751868	13.98	0.00454256	0.0217171	0.121816	0.0180259	0.000324932	0.940055	0.0178428	0.0331942	0.290789	0.204804	0.00573806	4.0619	0.00318847	0.0127044	0.290475	0.0280173
24	1	0	0	0.38473	0.445144	1.25911	0.543651	0.121847	1.29034	0.0648185	0.193193	1.16097	0.224128	0.0502335	0.706993	0.173671	0.185117	0.380728	0.768404	0.0492904	6.76051	0.0278179	0.0871479	0.366852	0.0641465	0.00411477	1.04178	0.530306	0.604956	1.57743	0.621099	0.180985	1.14793	0.0974723	0.345338	1.49594	0.291395	0.0849112	0.840245	0.0583549	0.0672041	0.200784	0.736799	0.0245835	12.876	0.0143341	0.0421281	0.198191	0.0333653
24	2	0	0	0.570416	0.588133	0.929731	0.310617	0.0445558	1.13426	0.0233384	0.214962	0.718597	0.143443	0.0205758	0.673003	0.577981	0.586637	0.826842	0.557526	0.0560443	3.11269	0.0314535	0.146222	0.446974	0.100523	0.0101049	1.00541	0.209454	0.226075	0.434296	0.65763	0.0560206	4.31771	0.0313319	0.12614	0.412666	0.0851857	0.0072566	0.879587	1.08791	1.09494	1.44406	0.370286	0.0459124	1.62742	0.02502	0.188679	0.611169	0.123992
24	3	0	0	1.0261	1.19579	3.15127	0.297436	0.182806	0.263605	0.0995743	0.710009	3.11465	0.614606	0.37774	0.680793	1.70151	1.88048	4.27245	0.265754	0.212986	0.181814	0.11678	0.969081	3.79059	0.801439	0.642305	0.665548	0.37431	0.429765	1.25553	0.314792	0.0665359	0.83049	0.0371021	0.226673	1.19347	0.211364	0.0446749	0.709793	0.551427	0.622577	1.46893	0.246409	0.0712839	0.464004	0.0388321	0.358894	1.43968	0.289291
24	4	0	0	0.0357526	0.0462165	0.15559	0.251238	0.00736656	5.26531	0.0045267	0.0353278	0.154474	0.029321	0.000859723	0.720651	0.0248655	0.0333211	0.116827	0.397981	0.00883798	11.3263	0.00558556	0.0202627	0.116507	0.022207	0.000493152	0.89134	0.0104613	0.011921	0.0356059	0.836153	0.00478495	88.4329	0.00289599	0.00724637	0.0351419	0.00572258	3.27479e-05	0.994107	0.0143571	0.0178905	0.051915	0.396444	0.00423676	22.0708	0.00252071	0.0126238	0.0509776	0.0106869
24	1	0	0	0.296315	0.339271	0.929097	0.527062	0.0871752	1.67445	0.0458073	0.163579	0.902187	0.165398	0.0273566	0.71836	0.162497	0.17959	0.43432	0.727419	0.0556789	5.24395	0.0307235	0.0997922	0.417593	0.0765431	0.00585884	0.973392	0.374154	0.434477	1.20624	0.612024	0.135304	1.47588	0.0721338	0.273897	1.17822	0.221077	0.0488749	0.828828	0.0546886	0.0625197	0.17165	0.708256	0.0214787	13.6536	0.0125569	0.0386732	0.169332	0.0303262
24	2	0	0	0.534657	0.569662	0.850339	0.229472	0.0451622	0.627675	0.0243123	0.311801	0.806815	0.196809	0.038734	0.628529	0.510354	0.532334	1.0388	0.397664	0.0602619	1.45958	0.0335182	0.208918	0.850326	0.15154	0.0229643	0.901528	0.300887	0.328499	0.759314	0.408456	0.0538999	1.72121	0.0299722	0.185367	0.743242	0.13196	0.0174134	0.822396	1.04852	1.06407	1.45338	0.270675	0.0491098	0.795982	0.0262025	0.300374	0.847691	0.181434
24	3	0	0	0.638968	0.727264	2.82876	0.32722	0.113765	0.518512	0.0626753	0.282831	2.78311	0.347671	0.120875	0.732789	1.03181	1.1059	3.39495	0.324157	0.12913	0.451621	0.0716668	0.417376	3.12373	0.398357	0.158688	0.750697	0.192737	0.219091	0.897914	0.422374	0.0440465	2.29079	0.0249123	0.112938	0.879248	0.104283	0.010875	0.939318	0.328228	0.348969	0.951158	0.367795	0.0436323	1.71517	0.0241386	0.11272	0.864498	0.118632
24	4	0	0	0.0371972	0.0462173	0.137827	0.342458	0.00940456	7.32097	0.00552116	0.0326814	0.136651	0.0274619	0.000754157	0.873979	0.0292886	0.0394102	0.166709	0.351979	0.00929226	8.16263	0.00568905	0.0266553	0.166521	0.0264001	0.000696964	0.843353	0.0114876	0.0132703	0.0406834	0.794764	0.00528623	70.6818	0.00312697	0.00956594	0.039917	0.00665132	4.42401e-05	0.941814	0.0156061	0.0199234	0.0606477	0.319756	0.0039648	15.0607	0.00231553	0.0135092	0.0599977	0.0123995
24	1	0	0	0.231918	0.275322	0.817674	0.45288	0.067277	1.61472	0.0356341	0.158756	0.778404	0.148554	0.0220682	0.722913	0.115515	0.128965	0.320614	0.665992	0.038235	6.66704	0.0219743	0.0791393	0.311478	0.0574105	0.00329597	1.01306	0.297457	0.348605	1.17559	0.517125	0.094115	1.55652	0.0515565	0.204825	1.15164	0.181997	0.0331228	0.848849	0.0554544	0.0661067	0.19798	0.52439	0.0188923	8.46718	0.0109901	0.0493551	0.193111	0.0360273
24	2	0	0	0.531101	0.566183	1.19326	0.245356	0.0481894	0.674988	0.026038	0.281155	1.10331	0.196406	0.0385755	0.625651	0.537079	0.565994	1.45476	0.420312	0.0751427	1.31858	0.042144	0.183844	1.22507	0.178778	0.0319617	0.868339	0.1934	0.212952	0.518814	0.60697	0.0541586	3.84717	0.0306296	0.122268	0.513308	0.0892277	0.00796159	0.957146	0.955124	0.973652	1.37831	0.280797	0.0531364	0.800039	0.0286492	0.291287	1.09938	0.189235
24	3	0	0	0.716074	0.77051	1.60937	0.445862	0.126943	0.864122	0.0700477	0.350797	1.59151	0.284714	0.0810623	0.899729	1.13124	1.18738	2.32499	0.408321	0.147448	0.617439	0.0805132	0.508711	1.87071	0.361107	0.130399	0.90349	0.173352	0.1901	0.452433	0.576045	0.0449812	4.21472	0.0256991	0.106453	0.434538	0.0780863	0.00609747	1.07512	0.297071	0.318451	0.654721	0.376368	0.0432127	1.80701	0.0238209	0.154763	0.626534	0.114815
24	4	0	0	0.039026	0.0487501	0.135416	0.306477	0.00896481	6.20598	0.00531002	0.0320703	0.134396	0.0292511	0.00085563	0.821935	0.0366012	0.0505365	0.190727	0.266788	0.00930797	4.76683	0.00580239	0.0311475	0.188194	0.034889	0.00121724	0.740336	0.0114025	0.0132624	0.0408035	0.831287	0.00563722	73.0856	0.00336092	0.00950563	0.04063	0.00678131	4.59861e-05	0.960213	0.0172139	0.0221189	0.0746967	0.361317	0.00502471	15.0735	0.00291514	0.0150722	0.0742602	0.0139066
24	1	0	0	0.214892	0.26684	0.873982	0.398838	0.0631617	1.33903	0.0335821	0.138432	0.850129	0.158365	0.0250793	0.612819	0.106726	0.124339	0.396215	0.650341	0.0415339	5.90308	0.0240769	0.0679243	0.395911	0.0638647	0.0040787	0.986138	0.29238	0.343313	1.16808	0.510449	0.0919488	1.53505	0.0498093	0.179997	1.1392	0.180133	0.032448	0.803454	0.058726	0.0647496	0.146674	0.626244	0.0170975	13.096	0.00976153	0.0366999	0.143445	0.0273017
24	2	0	0	0.568916	0.596691	1.50747	0.244361	0.0440127	0.722065	0.0234244	0.19756	1.31492	0.180114	0.0324409	0.601339	0.525114	0.558088	1.63826	0.373214	0.0706062	1.09468	0.0391796	0.186771	1.38863	0.189184	0.0357908	0.878212	0.232357	0.261436	0.585575	0.401822	0.0481995	1.87168	0.0269308	0.158351	0.575346	0.119952	0.0143886	0.854181	0.94584	0.964892	1.45263	0.235691	0.0450145	0.657659	0.0239894	0.297173	0.998138	0.190989
24	3	0	0	0.812379	0.879577	1.9483	0.345268	0.116532	0.548889	0.062526	0.374319	1.89985	0.337511	0.113914	0.758243	1.36555	1.41718	2.48367	0.37185	0.141074	0.520058	0.0748529	0.483941	2.10922	0.379384	0.143932	0.788157	0.207093	0.227078	0.532349	0.476862	0.0444624	2.89098	0.025133	0.128636	0.523939	0.0932395	0.0086936	0.967289	0.546346	0.57109	1.09783	0.342929	0.0570769	1.08771	0.0301318	0.202437	0.952013	0.166439
24	4	0	0	0.0243185	0.0335905	0.124185	0.319437	0.00740855	8.22577	0.00442459	0.02311	0.123806	0.0231925	0.000537893	0.789937	0.0172339	0.0223367	0.0933533	0.577598	0.0082149	24.7461	0.00500565	0.0146814	0.0927355	0.0142225	0.00020228	0.952626	0.0108723	0.0128859	0.0389541	0.631278	0.00437021	53.6587	0.00257161	0.00882999	0.0387293	0.0069228	4.79252e-05	1.00413	0.0114584	0.0165289	0.0627914	0.309798	0.00369379	15.1811	0.0021582	0.00901544	0.0626381	0.0119232
24	1	0	0	0.236505	0.294219	0.899761	0.439957	0.0770851	1.32671	0.0407282	0.139728	0.885787	0.17521	0.0306987	0.689381	0.121016	0.138399	0.378426	0.670769	0.0450949	5.68493	0.0256942	0.0891097	0.365164	0.0672287	0.0045197	1.0083	0.304865	0.366118	1.05307	0.552465	0.112127	1.48858	0.0613176	0.223471	1.0285	0.202958	0.0411921	0.817353	0.062974	0.0714155	0.201714	0.673939	0.0227248	11.1777	0.0127091	0.0406379	0.199384	0.0337194
24	2	0	0	0.594916	0.613812	0.911512	0.293605	0.0444009	1.05408	0.0241062	0.190793	0.760832	0.151227	0.0228695	0.748038	0.542193	0.56475	1.16326	0.620997	0.09819	2.24212	0.056055	0.212193	1.03912	0.158117	0.0250009	1.078	0.319414	0.351693	0.709872	0.381192	0.0561414	1.42262	0.0308579	0.199193	0.700544	0.147278	0.021691	0.924928	1.04544	1.05425	1.3408	0.393414	0.0535424	1.56308	0.0289519	0.164821	0.710173	0.136097
24	3	0	0	0.729498	0.790582	1.75656	0.368879	0.112516	0.654424	0.0608862	0.373218	1.64207	0.305021	0.0930378	0.806108	1.23379	1.29255	2.45262	0.368251	0.142017	0.522087	0.0776485	0.462911	2.14659	0.385652	0.148727	0.779698	0.164315	0.187082	0.469443	0.546488	0.0489289	3.59864	0.0288476	0.114943	0.462536	0.0895334	0.00801624	1.08259	0.370779	0.39018	0.697861	0.356429	0.043351	1.58883	0.0235034	0.15521	0.60875	0.121626
24	4	0	0	0.039398	0.051842	0.160472	0.282133	0.0095161	4.95523	0.00563735	0.0408589	0.159104	0.0337292	0.00113766	0.778146	0.0222859	0.0284075	0.110488	0.539207	0.00950819	18.9553	0.00589407	0.0167708	0.11011	0.0176337	0.000310946	0.943051	0.0133162	0.0154423	0.0392964	0.791332	0.00619396	58.436	0.00358013	0.010455	0.0387879	0.00782725	6.12659e-05	1.03767	0.0162936	0.0205904	0.0640403	0.401971	0.0050655	18.6666	0.0029643	0.0152071	0.0637777	0.0126017
25	1	1	0	0.0890542	0.106427	0.366535	0.635162	0.037039	6.07642	0.0206633	0.0587303	0.364617	0.0583143	0.00340056	0.973412	0.0569844	0.0675255	0.179392	0.635471	0.0230374	9.74549	0.0128079	0.0431766	0.177133	0.0362525	0.00131424	0.993288	0.143707	0.172998	0.556081	0.62924	0.0606458	3.62904	0.0337101	0.114889	0.549859	0.0963794	0.00928899	0.999337	0.0600751	0.0714683	0.177813	0.566997	0.021965	8.01205	0.0120239	0.0484911	0.174981	0.0387392
25	2	1	0	0.401941	0.426718	0.927382	0.677764	0.097189	2.66502	0.0547996	0.166567	0.914699	0.143396	0.0205625	0.981169	0.329468	0.366936	0.960241	0.87044	0.14071	3.12507	0.0816639	0.180535	0.93014	0.161653	0.0261318	1.00045	0.490613	0.529395	1.16049	0.765146	0.152295	2.15069	0.0852047	0.242683	1.10353	0.199041	0.0396173	0.993839	0.463743	0.493193	1.08785	0.864572	0.145246	2.93023	0.0827004	0.212946	1.04336	0.167998
25	3	1	0	0.59152	0.632214	1.29743	1.04357	0.233056	2.73704	0.136508	0.288109	1.23919	0.223326	0.0498744	1.11353	0.860222	0.910214	1.92693	1.01344	0.301727	1.99088	0.176473	0.397983	1.83975	0.297726	0.0886408	1.1436	0.642617	0.678534	1.43851	0.755888	0.164782	2.04398	0.0971363	0.278773	1.38172	0.217998	0.0475232	1.11441	0.503719	0.525731	1.01581	0.69014	0.103967	2.64707	0.060073	0.185881	0.88157	0.150646
25	4	1	0	0.021819	0.0252021	0.087565	0.591353	0.00746335	25.5374	0.00406772	0.0141784	0.0857242	0.0126208	0.000159285	0.936566	0.017408	0.0220676	0.0979104	0.400789	0.00543924	16.2964	0.00300149	0.0140183	0.0972569	0.0135713	0.000184181	0.760046	0.0262962	0.0323263	0.150233	0.398901	0.00750484	11.5151	0.00407589	0.0186174	0.149159	0.0188138	0.00035396	0.762457	0.0203215	0.0238401	0.0611604	0.368678	0.00459871	15.9099	0.0024754	0.0178337	0.0605977	0.0124735
25	1	1	0	0.125707	0.161776	0.954749	0.539127	0.054939	2.95033	0.0306372	0.0865054	0.94811	0.101903	0.0103843	0.888446	0.0659106	0.081488	0.485203	0.618269	0.0296475	7.20125	0.0165588	0.0469845	0.481869	0.0479524	0.00229944	0.932606	0.190096	0.235362	1.13293	0.588444	0.0817217	2.30931	0.0445397	0.140618	1.1277	0.138878	0.019287	0.881862	0.0850821	0.102048	0.377496	0.58577	0.0330293	5.60658	0.0178255	0.0643573	0.374548	0.0563861
25	2	1	0	0.406045	0.439246	1.1366	0.700197	0.117373	2.35258	0.0661055	0.204216	1.10412	0.167628	0.0280992	1.0503	0.39532	0.439384	1.16022	0.95267	0.182819	2.89443	0.106591	0.214697	1.14404	0.191902	0.0368262	1.02794	0.538374	0.575163	1.45023	0.855339	0.17323	2.40563	0.0986732	0.246815	1.43664	0.202528	0.0410175	1.01872	0.529214	0.550198	1.14657	1.03713	0.156184	3.94712	0.0895127	0.175747	1.11163	0.150592
25	3	1	0	0.494481	0.549369	1.346	0.942537	0.225741	2.28869	0.131284	0.322896	1.33838	0.239504	0.057362	1.16902	0.827681	0.887585	1.78179	1.05509	0.338408	1.90843	0.196326	0.449657	1.70817	0.320739	0.102874	1.18012	0.434189	0.458077	1.02204	0.891762	0.130269	3.47795	0.0742176	0.17045	0.959322	0.14608	0.0213394	1.19802	0.393766	0.40851	0.815405	0.783733	0.0852884	4.09165	0.0484554	0.149523	0.770079	0.108823
25	4	1	0	0.0303574	0.0334433	0.0771123	0.599667	0.00842001	23.5325	0.00463953	0.0205397	0.0754494	0.0140412	0.000197154	0.866921	0.0136914	0.0166684	0.0521934	0.497313	0.0047311	29.1505	0.00263822	0.0107765	0.0518063	0.00951333	9.05034e-05	0.825743	0.0337866	0.0374587	0.0793934	0.445068	0.00720364	14.747	0.00386328	0.0230138	0.0763917	0.0161855	0.00026197	0.801918	0.0187919	0.021542	0.0776883	0.410295	0.00432413	20.8381	0.00231453	0.0133647	0.0764091	0.0105391
25	1	1	0	0.140068	0.175525	0.652773	0.563145	0.059647	2.91147	0.0326626	0.0941755	0.644468	0.105918	0.0112186	0.831169	0.0745289	0.0893524	0.275036	0.776964	0.038344	8.76946	0.0213582	0.0633619	0.271505	0.049351	0.00243553	0.893553	0.220615	0.268951	0.926787	0.648294	0.0998549	2.30539	0.054694	0.164532	0.922971	0.154027	0.0237244	0.844147	0.0721144	0.0844686	0.212875	0.565295	0.0248949	6.98448	0.0135458	0.0632852	0.211523	0.0440388
25	2	1	0	0.329867	0.360708	0.81113	0.631824	0.0922569	2.45761	0.0523984	0.194047	0.800196	0.146017	0.0213209	1.12334	0.373017	0.410816	0.990545	0.959407	0.165229	3.2215	0.0955484	0.20192	0.976585	0.17222	0.0296596	1.11942	0.472342	0.50882	1.30205	0.855355	0.161909	2.57826	0.0923794	0.227546	1.27676	0.189289	0.0358302	1.15103	0.481627	0.508334	1.02471	0.921396	0.1499	3.19199	0.0844833	0.201492	0.970424	0.162688
25	3	1	0	0.42259	0.471247	1.21266	0.896829	0.187141	2.49771	0.108758	0.27723	1.2016	0.20867	0.0435431	1.15408	0.582833	0.631349	1.55003	1.05377	0.255908	2.54791	0.150264	0.304064	1.51774	0.242849	0.0589756	1.16675	0.634252	0.677984	1.51803	0.905212	0.216974	2.18901	0.125766	0.332346	1.48572	0.239694	0.0574533	1.24401	0.280183	0.301723	0.650085	1.0123	0.113398	5.34335	0.067051	0.155058	0.646757	0.11202
25	4	1	0	0.0246591	0.0272867	0.0688779	0.590305	0.00690092	27.4151	0.00374672	0.0154013	0.068627	0.0116904	0.000136666	0.966874	0.014144	0.0159056	0.036124	0.629554	0.00458329	47.5077	0.00251798	0.0107608	0.0349072	0.00728021	5.30015e-05	0.981735	0.0270962	0.0300693	0.0704012	0.511245	0.00666919	20.9394	0.00356331	0.0174452	0.068943	0.013045	0.000170172	0.918364	0.0162422	0.0181141	0.0420159	0.443853	0.00356173	29.2984	0.00188663	0.0119904	0.0411541	0.00802458
25	1	1	0	0.106469	0.122994	0.419374	0.740778	0.0456485	6.89847	0.0261957	0.0662271	0.412241	0.0616224	0.00379732	1.14272	0.0605668	0.0711392	0.350394	0.568887	0.0212433	8.39242	0.0117025	0.0490056	0.348384	0.0373418	0.00139441	0.944104	0.15835	0.186487	0.619131	0.586945	0.0578567	3.2128	0.0312174	0.120247	0.611148	0.0985727	0.00971657	0.893362	0.0964073	0.115476	0.371587	0.572682	0.036427	4.96693	0.020096	0.0808968	0.369339	0.0636078
25	2	1	0	0.324971	0.364994	1.10085	0.567048	0.0942868	1.92406	0.0531963	0.209478	1.06837	0.166277	0.0276479	1.0282	0.409876	0.44917	1.1907	0.918195	0.168797	2.90962	0.0983321	0.21625	1.16586	0.183836	0.0337955	1.06015	0.420402	0.455228	1.35914	0.805403	0.140729	2.61327	0.0797853	0.195215	1.29991	0.174731	0.0305309	1.05894	0.46112	0.489482	1.25218	0.968688	0.159151	3.38225	0.0912969	0.186119	1.20973	0.164295
25	3	1	0	0.368673	0.418179	1.17979	0.806305	0.159236	2.3322	0.0909597	0.231247	1.16121	0.197489	0.0390017	1.13774	0.506313	0.558201	1.39645	1.0125	0.238107	2.46974	0.136586	0.313561	1.36093	0.235167	0.0553037	1.09841	0.507285	0.542024	1.10583	0.993291	0.189761	3.00776	0.109775	0.26424	1.09691	0.191043	0.0364973	1.17526	0.198495	0.221131	0.541168	0.933139	0.0910018	5.51811	0.0524805	0.135431	0.527798	0.0975222
25	4	1	0	0.022401	0.0265438	0.0974696	0.504034	0.00718192	19.4535	0.00394966	0.0181861	0.0972861	0.0142489	0.000203031	0.798377	0.0104786	0.0125408	0.0531725	0.578479	0.00398826	47.5779	0.0022615	0.00749117	0.0529592	0.00689438	4.75325e-05	0.930307	0.0240985	0.0294819	0.100358	0.381737	0.00648744	12.1811	0.00351807	0.0199556	0.0992779	0.0169945	0.000288814	0.728154	0.0138429	0.0161741	0.0508729	0.351204	0.00293975	22.1276	0.00155038	0.010913	0.0506773	0.0083705
25	1	1	0	0.126908	0.148767	0.461182	0.691175	0.0536862	4.98982	0.0301047	0.0876404	0.4605	0.0776737	0.00603321	1.057	0.0676115	0.0830134	0.280305	0.579104	0.0279093	6.56676	0.0152523	0.0523512	0.278743	0.0481939	0.00232265	0.940593	0.182462	0.213897	0.693115	0.687666	0.0768047	3.35685	0.0418747	0.150565	0.684483	0.111689	0.0124744	0.999572	0.114124	0.136149	0.392459	0.591656	0.0439538	4.31268	0.0238014	0.0968546	0.38534	0.0742894
25	2	1	0	0.306095	0.334769	0.722816	0.651151	0.0883254	2.74495	0.0505059	0.200046	0.697055	0.135645	0.0183996	1.09002	0.42244	0.448242	0.969018	1.02838	0.154236	3.93046	0.088411	0.184689	0.921612	0.149979	0.0224938	1.10084	0.405984	0.439175	1.10853	0.830818	0.139238	2.824	0.0793178	0.214397	1.08221	0.167592	0.0280871	1.10565	0.452227	0.47605	1.04504	1.02047	0.151848	3.95075	0.0874773	0.169856	0.997792	0.148802
25	3	1	0	0.40862	0.459051	1.16738	0.822639	0.172162	2.22815	0.0975891	0.265075	1.15982	0.20928	0.0437983	1.18088	0.601631	0.656018	1.4949	1.00606	0.263243	2.20824	0.151185	0.344397	1.44719	0.261656	0.068464	1.13913	0.52616	0.572993	1.46613	0.863479	0.196001	2.2018	0.113446	0.276748	1.45887	0.22699	0.0515244	1.23186	0.259374	0.281019	0.645295	1.02201	0.110583	5.54238	0.0648882	0.1434	0.639461	0.108202
25	4	1	0	0.0285381	0.0330871	0.0939101	0.59023	0.00988952	19.3509	0.00543261	0.0213012	0.0931736	0.0167554	0.000280743	0.9022	0.0158449	0.0185228	0.0614093	0.634099	0.00608755	37.1501	0.00342398	0.01233	0.0611166	0.00960031	9.2166e-05	0.908842	0.0321973	0.0374466	0.0909973	0.404041	0.00773101	11.4965	0.00420907	0.0252362	0.0902161	0.0191342	0.000366117	0.796026	0.0225807	0.0257366	0.0566908	0.323631	0.00399929	13.994	0.002137	0.0203499	0.0562647	0.0123575
26	1	1	0	0.145934	0.179083	0.716963	0.629424	0.0653895	3.62951	0.0391721	0.109735	0.711159	0.103888	0.0107927	0.9378	0.134482	0.169382	0.648437	0.447831	0.0461575	2.40962	0.0255978	0.132801	0.646085	0.103069	0.0106232	0.835671	0.222114	0.281285	0.971328	0.42745	0.0738356	1.32731	0.0396034	0.175508	0.958221	0.172735	0.0298374	0.713467	0.0717553	0.0902441	0.328588	0.45639	0.0249988	4.53842	0.0136167	0.0501252	0.32765	0.0547752
26	2	1	0	0.309396	0.351513	0.865162	0.560078	0.0935044	1.96789	0.0548489	0.23841	0.853102	0.166949	0.0278719	1.00104	0.314267	0.358152	1.03312	0.862969	0.148337	2.97898	0.0880192	0.181089	1.01942	0.171892	0.0295468	1.02264	0.293402	0.362863	1.0507	0.524525	0.112062	1.37609	0.0628098	0.237392	1.04212	0.213644	0.0456437	0.923006	0.599044	0.632352	1.23369	0.692508	0.140339	1.96555	0.0807216	0.268145	1.14902	0.202653
26	3	1	0	0.569645	0.649077	2.03461	0.825837	0.257151	1.51614	0.147004	0.36189	2.02579	0.311382	0.0969589	1.13727	0.579595	0.652568	1.61445	0.788976	0.236769	1.46344	0.131794	0.429843	1.5852	0.300096	0.0900578	1.07052	1.05585	1.21843	3.40518	0.623871	0.379655	0.572882	0.212155	0.855564	3.39072	0.608547	0.37033	1.00597	0.515487	0.60708	1.70744	0.74344	0.238576	1.29921	0.133795	0.398217	1.69511	0.320908
26	4	1	0	0.583788	0.644318	2.04503	1.09882	0.299796	2.50483	0.186456	0.344146	1.9989	0.272835	0.0744389	1.23067	0.668823	0.693856	1.38119	0.582097	0.107583	1.66764	0.0569634	0.261826	1.27464	0.184819	0.0341582	0.801071	1.98531	2.0432	4.30818	0.462193	0.223364	0.507024	0.118415	0.479951	3.60245	0.48327	0.23355	0.762258	0.360696	0.42008	1.24229	0.717739	0.154655	1.82761	0.0848554	0.268384	1.2312	0.215476
26	1	1	0	0.12421	0.152205	0.816592	0.595501	0.0524186	3.80381	0.029473	0.0811281	0.806886	0.0880244	0.00774829	1.00845	0.106856	0.132368	0.648839	0.573924	0.0448653	4.04146	0.0246974	0.0780802	0.647946	0.078173	0.00611101	0.902522	0.190053	0.232991	0.958759	0.573928	0.0774029	2.3468	0.042685	0.144461	0.953893	0.134865	0.0181886	0.898829	0.057992	0.0683781	0.180768	0.57431	0.0208199	8.76864	0.0115238	0.0457345	0.18032	0.036252
26	2	1	0	0.313152	0.356696	0.874987	0.464359	0.0793533	1.57739	0.0460642	0.252831	0.864475	0.170888	0.0292027	0.977805	0.377787	0.429377	1.21991	0.808053	0.164992	2.28198	0.0951387	0.233878	1.18738	0.204184	0.0416913	0.988556	0.260947	0.322912	1.01358	0.49773	0.0947277	1.46492	0.0530615	0.212316	1.00901	0.19032	0.0362215	0.934349	0.549133	0.572046	1.17628	0.624625	0.100175	2.17553	0.0559556	0.189602	1.06736	0.160376
26	3	1	0	0.434506	0.514685	1.62557	0.683694	0.18872	1.38394	0.105446	0.296789	1.6128	0.27603	0.0761928	0.988893	0.369605	0.442756	1.35372	0.674686	0.164564	1.58917	0.0945453	0.274154	1.32742	0.243913	0.0594934	0.957125	0.616481	0.739722	2.56723	0.610566	0.249759	0.853535	0.142823	0.360497	2.53028	0.409062	0.167332	0.887684	0.510422	0.57533	1.79284	0.715582	0.190074	1.50105	0.105907	0.314791	1.73791	0.265622
26	4	1	0	0.652162	0.730524	2.8131	1.03792	0.34189	2.03348	0.22064	0.385037	2.80223	0.329399	0.108503	1.22868	0.548396	0.599325	1.35537	0.479819	0.116088	1.05899	0.0619885	0.372468	1.33544	0.241941	0.0585356	0.85367	1.8962	2.0834	4.59374	0.251452	0.217188	0.155284	0.115847	1.23245	4.57193	0.863735	0.746038	0.633007	0.570325	0.633657	1.3513	0.608024	0.168016	1.19697	0.0913993	0.412341	1.33383	0.276332
26	1	1	0	0.117229	0.141826	0.481995	0.664169	0.0530511	4.72532	0.0301483	0.0873452	0.476244	0.0798759	0.00638016	0.980129	0.0981604	0.116326	0.326114	0.581133	0.0362973	5.11925	0.0199711	0.0764636	0.324838	0.0624595	0.00390119	0.964996	0.183506	0.226275	0.696039	0.516664	0.0684424	2.10881	0.037006	0.157504	0.691293	0.13247	0.0175483	0.872115	0.0703676	0.0896359	0.321258	0.478419	0.0265809	4.79262	0.0147943	0.0644596	0.320735	0.0555599
26	2	1	0	0.326009	0.370508	0.918306	0.546256	0.0962273	1.76237	0.0546892	0.26015	0.910849	0.176158	0.0310316	1.06786	0.491061	0.531887	1.45398	0.837105	0.171173	2.34957	0.0982427	0.260567	1.41389	0.204482	0.0418129	1.08342	0.304189	0.386689	1.31974	0.411761	0.0983631	0.953407	0.0544068	0.249089	1.31197	0.238884	0.0570656	0.807624	0.699373	0.724416	1.33661	0.765386	0.144612	2.28066	0.0814153	0.236783	1.23917	0.188939
26	3	1	0	0.852395	0.964337	2.73623	0.94324	0.425665	1.24184	0.252905	0.570736	2.70672	0.45128	0.203653	1.20409	0.72317	0.826052	2.11861	0.593602	0.237151	0.819362	0.130778	0.541262	2.10254	0.399511	0.159609	1.00013	1.68568	1.87766	3.78782	0.471734	0.390439	0.308353	0.211231	1.28712	3.70025	0.827667	0.685032	0.932213	1.09989	1.20048	2.87831	0.717141	0.345203	0.808003	0.18722	0.636429	2.82875	0.48136
26	4	1	0	0.714915	0.794448	1.99535	1.20409	0.417576	2.26018	0.271828	0.466201	1.95819	0.346797	0.120268	1.08412	0.723655	0.756709	1.45479	0.634552	0.140497	1.53988	0.0754895	0.268938	1.35101	0.221411	0.0490229	0.836258	2.41788	2.48119	4.28713	0.493531	0.275114	0.471606	0.146547	0.707088	3.20743	0.55744	0.31074	0.826267	0.5625	0.625477	1.22523	0.656532	0.179745	1.2983	0.0973146	0.445131	1.22352	0.27378
26	1	1	0	0.122875	0.146209	0.537328	0.620101	0.0491663	4.38501	0.0275665	0.0851215	0.53385	0.0792876	0.00628653	0.973436	0.105858	0.127484	0.351569	0.580311	0.0412487	4.47977	0.0226337	0.0903573	0.343981	0.0710804	0.00505243	0.963673	0.200229	0.235548	0.712493	0.613535	0.0761625	2.69055	0.0414614	0.16373	0.702787	0.124137	0.01541	0.976604	0.0801954	0.0970846	0.379096	0.472604	0.0258761	4.74959	0.0142383	0.0580803	0.375816	0.0547522
26	2	1	0	0.31892	0.368334	0.83919	0.605009	0.111566	1.89959	0.0645952	0.272557	0.833483	0.184404	0.0340049	1.09551	0.489572	0.544698	1.28237	0.794955	0.189945	1.91116	0.109111	0.289264	1.25469	0.238938	0.0570914	0.979616	0.330224	0.41026	1.50229	0.517909	0.126165	1.17035	0.0694525	0.278638	1.49307	0.243605	0.0593435	0.895134	0.740566	0.761857	1.42556	0.749005	0.134052	2.33285	0.0747242	0.228792	1.39299	0.178973
26	3	1	0	0.88302	0.989651	2.68054	0.955475	0.42726	1.30594	0.261138	0.625328	2.64419	0.44717	0.199961	1.29169	0.963051	1.09823	2.72841	0.439076	0.231935	0.449166	0.125331	0.69913	2.71684	0.528234	0.279031	0.893556	2.08114	2.28808	4.53176	0.406945	0.387226	0.228587	0.206971	1.46527	4.4181	0.951544	0.905436	0.861864	1.13595	1.24485	2.35968	0.588972	0.300103	0.62529	0.162343	0.786882	2.34311	0.509538
26	4	1	0	0.649222	0.708935	1.68567	1.18318	0.337239	2.66719	0.216683	0.364572	1.66981	0.285027	0.0812402	1.16567	0.745317	0.775149	1.42397	0.682885	0.145563	1.70601	0.0775157	0.284987	1.28496	0.213159	0.0454368	0.837076	2.45916	2.49785	3.88656	0.659167	0.288952	0.79625	0.153006	0.608092	2.38439	0.438359	0.192158	0.913069	0.437582	0.491219	1.12075	0.70405	0.157279	1.71144	0.0854079	0.316444	1.1056	0.223392
26	1	1	0	0.151041	0.179001	0.645049	0.560011	0.0538496	3.22544	0.0298236	0.0993932	0.640973	0.0961581	0.00924638	0.896734	0.132199	0.156766	0.457431	0.602326	0.0507993	3.90875	0.0278029	0.107603	0.452709	0.0843386	0.00711299	0.914462	0.26896	0.319205	1.22642	0.563654	0.096993	1.78418	0.0528318	0.183637	1.21639	0.172079	0.0296112	0.876725	0.0951912	0.11275	0.298275	0.530245	0.0320717	4.8819	0.01786	0.0842309	0.295018	0.0604847
26	2	1	0	0.335093	0.382011	1.0107	0.58278	0.106956	1.81969	0.061291	0.294205	1.00916	0.183527	0.0336821	1.14498	0.556692	0.601917	1.48638	0.889182	0.203651	2.22473	0.1167	0.277637	1.46462	0.229032	0.0524558	1.07058	0.307854	0.38504	1.7403	0.457835	0.105937	1.07862	0.0577491	0.24644	1.72912	0.231386	0.0535397	0.835245	0.800979	0.817546	1.47578	0.701158	0.114881	2.34657	0.0629934	0.203415	1.23323	0.163844
26	3	1	0	0.73787	0.855815	2.77833	0.775792	0.336604	1.06578	0.200638	0.547052	2.75758	0.433884	0.188255	1.12729	0.913586	1.03306	2.25006	0.465772	0.224792	0.514917	0.119937	0.765025	2.21499	0.482623	0.232925	0.859757	1.54167	1.7324	4.4946	0.47314	0.374175	0.321829	0.201278	0.994455	4.45629	0.790834	0.625418	0.858797	0.787063	0.864397	2.25493	0.585227	0.209303	0.881831	0.112795	0.44621	2.19828	0.357644
26	4	1	0	0.759964	0.808316	1.90383	1.20268	0.33141	2.68576	0.203936	0.363493	1.87126	0.275559	0.0759325	1.25633	0.767021	0.817666	1.52003	0.852885	0.241784	1.62753	0.130798	0.426684	1.50498	0.283489	0.0803662	0.904474	2.85285	2.88014	4.53423	0.697358	0.276022	0.935223	0.146518	0.50458	2.66046	0.395811	0.156666	0.908653	0.893861	0.934086	1.52771	0.77094	0.209194	1.51785	0.11176	0.402222	1.31227	0.271349
27	1	1	0	0.261607	0.301313	0.817792	0.651237	0.0974436	2.43021	0.0544092	0.154777	0.802747	0.149629	0.0223887	0.937053	0.339389	0.395302	1.11241	0.562492	0.114101	1.47924	0.0608678	0.271154	1.10512	0.20285	0.0411481	0.79677	0.238912	0.283905	0.845574	0.499121	0.0766157	1.74962	0.0412258	0.200532	0.831497	0.153501	0.0235627	0.820478	0.175079	0.215737	0.573654	0.413054	0.0521113	1.75241	0.0278924	0.187537	0.570651	0.126161
27	2	1	0	0.406616	0.525396	2.89634	0.471554	0.156953	0.832818	0.092263	0.317728	2.89331	0.332842	0.110784	0.9389	0.323841	0.414727	2.08707	0.325134	0.0842677	0.663541	0.0445723	0.30776	2.08215	0.259178	0.0671733	0.682983	0.505387	0.670133	2.63793	0.259515	0.114246	0.31126	0.0603222	0.532704	2.62938	0.440227	0.1938	0.640236	0.417418	0.544562	2.81491	0.358418	0.125393	0.548184	0.067096	0.415834	2.80769	0.349853
27	3	1	0	1.02842	1.15823	3.0051	0.434173	0.231515	0.43403	0.123411	0.541784	2.89285	0.533233	0.284337	0.745415	1.25262	1.36162	3.14391	0.402342	0.214962	0.400921	0.114443	0.702018	2.87798	0.534276	0.285451	0.723758	0.942896	1.07817	2.84467	0.534746	0.279854	0.55986	0.153337	0.736884	2.78585	0.523339	0.273884	0.821197	0.387439	0.427346	1.05266	0.496428	0.0895948	1.5006	0.0488783	0.222532	1.02266	0.180479
27	4	1	0	0.25791	0.295681	0.828377	0.877515	0.127008	3.73875	0.0783214	0.218816	0.824026	0.144736	0.0209486	1.14428	0.178304	0.207605	0.477222	0.424743	0.0452078	2.20781	0.0250112	0.187316	0.466687	0.106436	0.0113285	0.734918	0.616032	0.710598	1.36914	0.193799	0.068707	0.287391	0.036122	0.613003	1.36638	0.354527	0.125689	0.528385	0.178802	0.197746	0.549263	0.316266	0.026737	1.96903	0.0140725	0.0982483	0.54085	0.0845395
27	1	1	0	0.347182	0.411492	1.13283	0.525633	0.116194	1.2953	0.063295	0.225102	1.11131	0.221055	0.0488651	0.856177	0.401323	0.477493	1.38895	0.48993	0.126855	1.01428	0.0679995	0.298317	1.36476	0.258924	0.0670419	0.802617	0.28718	0.360337	1.36506	0.526354	0.114647	1.32874	0.0630387	0.230576	1.35565	0.217813	0.0474423	0.869008	0.146566	0.179188	0.622571	0.50343	0.0519362	2.6253	0.0279409	0.136409	0.621346	0.103165
27	2	1	0	0.321644	0.383122	1.43717	0.549971	0.114541	1.51159	0.0655653	0.212025	1.43052	0.208267	0.0433751	0.964717	0.236417	0.279128	0.89553	0.441457	0.0655431	1.58999	0.0350486	0.180676	0.891939	0.14847	0.0220434	0.846388	0.416322	0.515042	1.82988	0.40337	0.122377	0.713105	0.0656368	0.334134	1.82231	0.303387	0.0920437	0.788008	0.521024	0.598734	1.70493	0.481503	0.142114	0.868551	0.0756605	0.449087	1.67844	0.295146
27	3	1	0	1.21713	1.37522	3.39337	0.399529	0.256006	0.327641	0.134525	0.606554	3.26569	0.64077	0.410586	0.675608	1.30686	1.44287	3.25246	0.376482	0.230449	0.326019	0.122153	0.769431	2.94329	0.612113	0.374682	0.684556	1.07374	1.25844	3.37982	0.430274	0.28266	0.350381	0.15121	0.846851	3.30367	0.65693	0.431557	0.669038	0.368098	0.451917	1.51573	0.434553	0.114033	0.888063	0.0611532	0.296348	1.48558	0.262415
27	4	1	0	0.07215	0.0905107	0.366526	0.682371	0.0373296	7.52362	0.0225161	0.0634186	0.36565	0.0547058	0.00299272	0.934605	0.0914599	0.107222	0.247606	0.357322	0.0200167	3.41604	0.0107198	0.0946801	0.244491	0.0560187	0.00313809	0.732457	0.112454	0.141091	0.474355	0.27824	0.0237335	1.75603	0.0127766	0.118253	0.472698	0.0852986	0.00727584	0.624798	0.0531784	0.0673741	0.249133	0.279992	0.0115947	3.59037	0.00615695	0.0466714	0.246966	0.0414108
27	1	1	0	0.280097	0.338691	1.15103	0.4819	0.0918408	1.38152	0.0501779	0.191494	1.14453	0.190581	0.0363209	0.806569	0.35268	0.418833	1.26793	0.503562	0.113863	1.18276	0.0604723	0.283721	1.24954	0.226116	0.0511283	0.792709	0.208608	0.254705	0.800592	0.556795	0.0814428	2.10511	0.0450391	0.176532	0.791356	0.146271	0.0213951	0.871604	0.127387	0.158332	0.636028	0.501243	0.0471733	2.88024	0.0255108	0.109636	0.630838	0.0941126
27	2	1	0	0.284499	0.322494	1.01723	0.665833	0.10119	2.54404	0.0587584	0.186897	0.997978	0.151975	0.0230965	1.05249	0.164584	0.190271	0.6305	0.534931	0.0511095	3.00761	0.0274555	0.111329	0.618848	0.0955441	0.00912868	0.883447	0.390159	0.471067	1.48536	0.399905	0.105641	0.809539	0.0564925	0.312825	1.47913	0.264166	0.0697836	0.741948	0.45099	0.513498	1.16529	0.386648	0.0950065	0.842836	0.0508884	0.385781	1.15897	0.245719
27	3	1	0	0.922592	1.01868	3.19405	0.384147	0.166036	0.475576	0.0888439	0.452991	3.10736	0.432219	0.186813	0.747774	1.2461	1.31734	2.81946	0.385788	0.16498	0.479409	0.0876741	0.600775	2.58893	0.427644	0.182879	0.757796	0.706998	0.805493	2.00729	0.436732	0.168695	0.606078	0.0904285	0.580396	1.93775	0.386268	0.149203	0.801006	0.382391	0.456798	1.78266	0.375189	0.0938261	0.809875	0.0506482	0.232798	1.77867	0.250077
27	4	1	0	0.143346	0.186551	0.619447	0.458921	0.0548881	2.13086	0.0304815	0.122133	0.614516	0.119603	0.0143048	0.779362	0.128855	0.172826	0.638807	0.344114	0.0397052	1.57275	0.0209387	0.126194	0.634391	0.115384	0.0133134	0.588206	0.163667	0.211151	0.674058	0.463875	0.0619975	1.8902	0.033764	0.147218	0.671853	0.133651	0.0178627	0.696399	0.0976349	0.13268	0.491858	0.411746	0.0370586	2.47585	0.0200559	0.0933563	0.486413	0.0900035
27	1	1	0	0.329271	0.380658	1.06717	0.585411	0.111929	1.68304	0.0615259	0.201509	1.05275	0.191197	0.0365564	0.840917	0.374622	0.442407	1.32956	0.535875	0.12624	1.21249	0.0672894	0.272528	1.31211	0.235577	0.0554967	0.779629	0.261866	0.315996	0.977037	0.553937	0.0980705	1.70375	0.0534026	0.197939	0.966419	0.177043	0.0313441	0.807223	0.158061	0.204244	0.612875	0.351136	0.0454674	1.45668	0.0244237	0.14623	0.607179	0.129487
27	2	1	0	0.30671	0.362791	1.42153	0.572124	0.110933	1.69652	0.0637824	0.203853	1.41176	0.193897	0.037596	0.949243	0.199932	0.234399	0.602121	0.485718	0.0594679	2.12987	0.0319263	0.16553	0.597547	0.122433	0.0149898	0.881541	0.423738	0.511693	1.56254	0.418947	0.120249	0.782525	0.0644674	0.312638	1.54611	0.287026	0.0823838	0.750325	0.533144	0.587897	1.61002	0.539003	0.133625	1.16057	0.0713293	0.309728	1.6016	0.247912
27	3	1	0	0.922342	1.03369	2.78544	0.470918	0.219938	0.546493	0.119206	0.579884	2.71251	0.467042	0.218128	0.816236	1.23625	1.31158	3.09894	0.475033	0.208267	0.574522	0.110434	0.592666	2.74266	0.438427	0.192218	0.772033	0.947705	1.07728	2.9999	0.443998	0.227605	0.469985	0.123506	0.66729	2.98175	0.512627	0.262786	0.755516	0.349613	0.397375	1.00362	0.521131	0.0985093	1.50115	0.0536394	0.2633	0.982412	0.18903
27	4	1	0	0.146515	0.183861	0.953854	0.640549	0.0712133	3.47933	0.0430044	0.10938	0.949414	0.111175	0.0123599	0.941006	0.157497	0.213692	0.822823	0.211763	0.0306109	0.772448	0.0161406	0.11343	0.820275	0.144552	0.0208954	0.529052	0.206122	0.253875	0.801564	0.266697	0.0395616	0.944894	0.020792	0.169268	0.795166	0.148339	0.0220046	0.583945	0.0837486	0.103421	0.317424	0.357961	0.0217399	3.14842	0.0116128	0.0613787	0.314559	0.0607326
27	1	1	0	0.250578	0.295648	1.36676	0.548199	0.0860778	1.91254	0.0471539	0.161432	1.36249	0.157019	0.0246551	0.878219	0.328209	0.389588	1.49784	0.501272	0.105294	1.25825	0.0555176	0.274997	1.48486	0.210054	0.0441227	0.835789	0.231928	0.282033	0.961684	0.533573	0.0856887	1.83998	0.0474539	0.200582	0.957475	0.160594	0.0257905	0.846992	0.132466	0.152545	0.57757	0.566497	0.042886	4.04797	0.0231992	0.0961635	0.575105	0.0757038
27	2	1	0	0.321432	0.376173	1.27548	0.615929	0.12045	1.85519	0.0709486	0.214549	1.25582	0.195559	0.0382432	0.888749	0.20972	0.25099	0.88461	0.560029	0.0772783	2.21438	0.0421645	0.164649	0.873649	0.13799	0.0190412	0.869544	0.430385	0.553255	1.83289	0.342535	0.11917	0.519714	0.0629052	0.423956	1.8138	0.347905	0.121038	0.672205	0.476977	0.52451	1.38304	0.499768	0.10912	1.21746	0.0580404	0.312097	1.30851	0.218342
27	3	1	0	0.839773	0.9419	2.39491	0.429789	0.183475	0.541107	0.0986115	0.523075	2.34437	0.426896	0.18224	0.747499	1.2473	1.30871	2.67084	0.479883	0.190275	0.645099	0.101419	0.490192	2.59778	0.396504	0.157215	0.797592	0.80794	0.895437	2.36193	0.529474	0.204567	0.737864	0.110143	0.57524	2.27544	0.386358	0.149273	0.842476	0.445309	0.527969	1.87477	0.410084	0.116407	0.770097	0.0620526	0.310627	1.8648	0.283862
27	4	1	0	0.0512362	0.0678672	0.260472	0.473603	0.0211009	5.96847	0.0118478	0.0334009	0.259141	0.0445541	0.00198507	0.672094	0.0339276	0.0469319	0.237828	0.384875	0.0124939	6.66636	0.00702493	0.0258648	0.236923	0.0324621	0.00105379	0.652301	0.0743516	0.112215	0.657657	0.269371	0.0226645	1.7121	0.0121205	0.0617134	0.65589	0.0841387	0.00707932	0.51278	0.0262878	0.0335706	0.150633	0.404405	0.00845271	10.6536	0.00465429	0.023799	0.150434	0.0209016
28	1	1	0	0.110077	0.126966	0.327292	0.603387	0.0382211	5.3921	0.0216359	0.0727672	0.325028	0.0633444	0.00401251	0.874396	0.0522165	0.0647606	0.245798	0.550119	0.021097	7.88728	0.0115999	0.0410936	0.244675	0.0383498	0.00147071	0.855849	0.166496	0.196182	0.513526	0.512086	0.0531951	2.61066	0.0281713	0.159263	0.504758	0.103879	0.0107909	0.814806	0.0634209	0.0735274	0.200146	0.643594	0.0239708	9.71318	0.0134742	0.0468869	0.196875	0.0372452
28	2	1	0	0.349269	0.389402	0.990465	0.388763	0.067013	1.22362	0.0363575	0.227102	0.972274	0.172375	0.0297132	0.787011	0.263295	0.312714	0.990866	0.451569	0.076275	1.47179	0.0419915	0.173765	0.979344	0.168911	0.0285309	0.817108	0.1906	0.225946	0.646418	0.447101	0.0543127	2.09403	0.0309011	0.145444	0.637507	0.121477	0.0147568	0.814551	0.628114	0.658032	1.38986	0.390325	0.0766536	1.07493	0.0414565	0.216159	1.23356	0.196384
28	3	1	0	1.15677	1.25177	3.3351	0.452872	0.216875	0.515711	0.11827	0.554188	3.29271	0.478888	0.229334	0.77538	1.43865	1.5157	3.66851	0.459189	0.219333	0.527901	0.120442	0.618726	3.56865	0.477653	0.228152	0.796925	1.32614	1.41357	2.75306	0.381722	0.187029	0.423508	0.101668	0.67824	2.56005	0.489962	0.240063	0.660715	0.397804	0.447151	1.46206	0.474941	0.0970878	1.26964	0.0530555	0.252606	1.42634	0.204421
28	4	1	0	0.0201165	0.0240156	0.0688127	0.42571	0.0055902	17.7294	0.00305717	0.0164176	0.0681715	0.0131315	0.000172435	0.738287	0.0138721	0.0182342	0.0654148	0.35434	0.00419778	16.8838	0.00236957	0.0121888	0.0646868	0.0118468	0.000140346	0.807651	0.0211116	0.0250178	0.0743498	0.422507	0.00567751	16.8421	0.0030412	0.0172245	0.0741598	0.0134377	0.000180571	0.772856	0.0113205	0.0128937	0.0376173	0.608385	0.00375891	53.3481	0.00203651	0.00809393	0.0364453	0.00617851
28	1	1	0	0.102889	0.116488	0.284876	0.639186	0.0349494	6.45766	0.0193064	0.0809932	0.283708	0.054678	0.00298968	0.926995	0.0645389	0.0759529	0.197516	0.60611	0.0242981	8.34995	0.0134191	0.0541576	0.196318	0.0400885	0.00160709	0.919436	0.142479	0.16668	0.403739	0.487594	0.0422216	3.00766	0.0225518	0.124187	0.395573	0.0865918	0.00749813	0.840796	0.0680222	0.0823722	0.246477	0.576299	0.0268019	6.73803	0.0145736	0.0597842	0.243381	0.0465069
28	2	1	0	0.276264	0.306753	0.755341	0.459582	0.0613468	1.89042	0.0336833	0.179105	0.752702	0.133484	0.0178179	0.907646	0.266209	0.300396	0.622776	0.433847	0.0604538	1.74038	0.0337923	0.203499	0.613245	0.139344	0.0194166	0.860522	0.156331	0.179601	0.453853	0.545605	0.0482965	3.40385	0.0266714	0.112127	0.448271	0.0885192	0.00783564	0.847565	0.532058	0.555654	1.18091	0.40198	0.0644771	1.34121	0.0345062	0.206302	0.997236	0.160399
28	3	1	0	0.901362	1.02997	3.13707	0.376397	0.18786	0.41483	0.103335	0.447102	3.10266	0.4991	0.249101	0.620902	1.14525	1.24345	3.26722	0.426573	0.206896	0.479071	0.112698	0.526581	3.04602	0.485019	0.235243	0.687825	1.02694	1.1255	2.81554	0.378413	0.174544	0.444956	0.0946664	0.623853	2.75747	0.461253	0.212754	0.670366	0.589624	0.65101	2.21904	0.334822	0.0925313	0.659131	0.050341	0.317254	2.11164	0.27636
28	4	1	0	0.0303095	0.0401954	0.14148	0.269203	0.00711533	5.5873	0.0039033	0.0228737	0.139385	0.0264311	0.000698603	0.601907	0.0279556	0.0434941	0.172808	0.191393	0.00638452	3.17363	0.00353152	0.0306096	0.17184	0.0333582	0.00111277	0.459518	0.0284128	0.0381835	0.136059	0.252969	0.00646031	5.37898	0.00350811	0.0228842	0.135055	0.025538	0.000652188	0.59137	0.0148803	0.0172518	0.0432969	0.463355	0.00404944	28.9793	0.00221335	0.00963059	0.0419241	0.0087394
28	1	1	0	0.118168	0.163247	1.04373	0.419577	0.0473024	2.03631	0.0258813	0.076429	1.03978	0.112738	0.0127099	0.731393	0.0922454	0.134123	0.994379	0.408724	0.0398328	2.33735	0.0221996	0.0771814	0.992182	0.0974565	0.00949776	0.682788	0.0935696	0.115749	0.387802	0.521899	0.0355942	4.26524	0.0198394	0.0887661	0.386773	0.0682013	0.00465142	0.823199	0.114939	0.160708	0.670391	0.371526	0.0417695	1.82869	0.0231142	0.0932706	0.668585	0.112427
28	2	1	0	0.300709	0.348407	1.14701	0.436231	0.0768377	1.37182	0.0425611	0.192871	1.13386	0.17614	0.0310252	0.796404	0.308759	0.357051	0.922607	0.420149	0.0754162	1.27825	0.0411849	0.216782	0.90811	0.179499	0.0322198	0.825723	0.375181	0.413352	1.03687	0.46321	0.0804453	1.49729	0.0451597	0.252447	1.01413	0.173669	0.030161	0.881656	0.445586	0.510297	1.41949	0.315457	0.0785377	0.69409	0.043022	0.358108	1.37261	0.248965
28	3	1	0	1.24182	1.37705	4.64156	0.396453	0.236176	0.35509	0.126016	0.6196	4.40565	0.595723	0.354886	0.743922	0.658221	0.874528	3.12776	0.287458	0.165689	0.271509	0.0902027	0.722083	3.11722	0.576392	0.332228	0.588924	1.83863	1.99485	5.29392	0.348241	0.269773	0.241361	0.144845	1.00755	4.90743	0.774673	0.600118	0.75154	0.239667	0.320276	1.09957	0.393718	0.0837328	1.01231	0.0457861	0.243666	1.09638	0.212672
28	4	1	0	0.0217075	0.0252675	0.0659132	0.600341	0.00777251	26.6273	0.00446327	0.0179709	0.0649856	0.0129468	0.00016762	0.957906	0.0155073	0.0192024	0.0770998	0.523995	0.00594115	25.9749	0.00333919	0.0116851	0.0768727	0.0113382	0.000128555	0.782582	0.0188059	0.0234679	0.0842519	0.498506	0.00700639	20.0825	0.00396703	0.0149845	0.0830783	0.0140548	0.000197536	0.850344	0.0170294	0.0212962	0.0868646	0.414915	0.00531201	17.9152	0.00293643	0.0143076	0.0862766	0.0128026
28	1	1	0	0.136233	0.199255	0.968137	0.264097	0.0384397	1.00526	0.0212966	0.109485	0.962498	0.145551	0.0211851	0.613436	0.109369	0.126437	0.386947	0.567768	0.036056	4.90152	0.0197671	0.0799857	0.379276	0.0635047	0.00403285	0.859866	0.114829	0.138362	0.477605	0.486821	0.0376157	3.43009	0.0204789	0.0921989	0.47128	0.0772681	0.00597037	0.84174	0.135073	0.20323	0.961898	0.238912	0.0363144	0.872089	0.0201486	0.0939674	0.957503	0.151999
28	2	1	0	0.477121	0.50764	1.01402	0.450259	0.0781432	1.42129	0.0428094	0.255219	0.962681	0.173552	0.0301202	0.890282	0.298041	0.333673	0.790115	0.555303	0.0834057	2.03486	0.0459055	0.206293	0.773444	0.150198	0.0225596	0.922812	0.508665	0.540842	1.18764	0.461468	0.0848955	1.39839	0.0473275	0.22007	1.01185	0.183968	0.0338443	0.926049	0.901627	0.930204	1.50878	0.32389	0.0741882	0.770301	0.0404143	0.30339	1.20767	0.229054
28	3	1	0	1.13279	1.18008	2.51806	0.462814	0.153258	0.747362	0.0819531	0.362915	2.10625	0.331144	0.109657	0.796898	1.90617	1.96415	3.4432	0.387539	0.183822	0.427724	0.0962334	0.690831	2.46757	0.474331	0.22499	0.707327	0.551072	0.601532	1.29233	0.406193	0.0980857	0.898906	0.0524156	0.292857	1.21859	0.241475	0.0583104	0.738105	0.338485	0.397306	0.980659	0.350172	0.0729433	0.896148	0.0388855	0.3295	0.974751	0.208307
28	4	1	0	0.0493225	0.061746	0.193458	0.217557	0.00808972	3.18855	0.00440873	0.0361883	0.189336	0.0371844	0.00138268	0.558509	0.0257297	0.0351618	0.141624	0.371772	0.00891873	8.56822	0.00493111	0.018633	0.139963	0.0239898	0.000575511	0.686229	0.0329223	0.0415315	0.152183	0.290578	0.0073643	6.25766	0.00401928	0.0257153	0.1509	0.0253436	0.000642299	0.650679	0.0174837	0.0204153	0.0655329	0.418107	0.00441159	21.6865	0.00241437	0.0134573	0.0644211	0.0105513
28	1	1	0	0.129458	0.143671	0.380143	0.610845	0.0380969	5.31097	0.0206581	0.0752406	0.364262	0.0623675	0.00388971	0.867279	0.163565	0.183565	0.433975	0.532189	0.0443874	3.40018	0.0236531	0.121326	0.425979	0.0834053	0.00695644	0.852716	0.110412	0.140244	0.437599	0.547815	0.0474185	3.38455	0.0253589	0.105435	0.433732	0.0865594	0.00749254	0.749998	0.0620247	0.0710049	0.188326	0.555361	0.0192143	8.64746	0.0103511	0.0466795	0.182387	0.0345979
28	2	1	0	0.353181	0.398348	0.848175	0.29762	0.0548836	0.853638	0.029029	0.29666	0.829391	0.184408	0.0340063	0.679063	0.221723	0.274467	0.829234	0.341012	0.055217	1.14293	0.0299658	0.193722	0.826457	0.161921	0.0262184	0.776918	0.40766	0.426766	0.850136	0.470267	0.059432	2.05068	0.0327529	0.161922	0.755672	0.126379	0.0159717	0.979623	0.738701	0.755481	1.23523	0.315236	0.0499618	1.07156	0.0269166	0.224752	0.770031	0.15849
28	3	1	0	1.00722	1.04811	1.98826	0.559883	0.162509	1.01783	0.0857498	0.396209	1.64243	0.290255	0.0842479	0.832402	1.89772	1.93061	2.97408	0.534577	0.189934	0.802717	0.101333	0.494381	1.82322	0.355298	0.126237	0.796891	0.397291	0.438368	0.900932	0.52596	0.0975684	1.50549	0.0518073	0.246129	0.895838	0.185505	0.0344122	0.840769	0.707711	0.732518	1.18563	0.475891	0.0900653	1.32282	0.0473807	0.282126	0.92166	0.189256
28	4	1	0	0.0206343	0.0250462	0.067327	0.405558	0.00576491	15.8247	0.00319753	0.0218603	0.0672002	0.0142148	0.00020206	0.787496	0.0216247	0.0291326	0.11021	0.334139	0.00653131	9.29354	0.0035508	0.0190523	0.109141	0.0195467	0.000382072	0.667068	0.0168045	0.0195349	0.052333	0.519587	0.00518227	29.0882	0.00289361	0.0130911	0.0509571	0.00997382	9.94771e-05	0.843138	0.0138038	0.0162096	0.0430656	0.464769	0.00395447	28.9617	0.00209664	0.00936378	0.0417303	0.00850844
29	1	1	0	0.306373	0.337082	0.807098	0.72528	0.102114	2.84223	0.0563406	0.153925	0.795527	0.140793	0.0198227	0.774832	0.150655	0.176582	0.46994	0.78271	0.0722107	4.90613	0.0417581	0.130125	0.465808	0.0922573	0.00851141	0.915888	0.488733	0.528103	1.14087	0.746071	0.149512	2.09845	0.084274	0.274931	1.04212	0.2004	0.0401601	0.861798	0.109263	0.128471	0.401101	0.736316	0.0498358	6.39216	0.0292822	0.0820517	0.39951	0.0676827
29	2	1	0	0.296014	0.313854	0.554267	0.464272	0.0484917	2.52753	0.0275732	0.146372	0.509732	0.104447	0.0109092	0.914211	0.302129	0.327701	0.73293	0.810712	0.103027	3.64656	0.0588911	0.169243	0.706535	0.127082	0.0161498	0.96553	0.211415	0.223134	0.514196	0.614663	0.0439225	4.82126	0.0246184	0.101999	0.469131	0.0714579	0.00510623	0.911488	0.495566	0.50395	0.679525	0.29688	0.0272133	1.84442	0.0154974	0.140272	0.412087	0.0916641
29	3	1	0	0.618837	0.682751	1.69883	0.585639	0.169137	1.18433	0.0987845	0.360117	1.60932	0.288807	0.0834095	0.902063	0.935385	1.00237	1.95348	0.483978	0.174599	0.791607	0.103024	0.391925	1.86029	0.360757	0.130146	0.861354	0.502741	0.545324	1.0869	0.443027	0.0937162	1.20143	0.0537611	0.309381	1.06528	0.211536	0.0447475	0.934934	0.413314	0.459728	1.06742	0.32521	0.0655512	0.934507	0.037968	0.201146	1.05522	0.201566
29	4	1	0	0.0287181	0.0333506	0.0758058	0.540892	0.00918334	18.4367	0.00531452	0.022654	0.0748371	0.0169781	0.000288257	1.03773	0.0287366	0.0366819	0.107526	0.384099	0.00876786	9.84758	0.00513135	0.0266553	0.105321	0.0228271	0.000521077	0.82275	0.0281441	0.0333874	0.110997	0.535998	0.00963969	17.4737	0.00565179	0.0218287	0.109964	0.0179846	0.000323445	0.927505	0.0169081	0.0189423	0.0496065	0.574616	0.00491331	37.7527	0.0027602	0.0117935	0.0471042	0.00855059
29	1	1	0	0.287596	0.329852	0.976779	0.584699	0.0945639	1.95685	0.0511851	0.17595	0.967016	0.161731	0.0261569	0.79789	0.164077	0.195901	0.555551	0.687257	0.0736516	3.55998	0.0408859	0.123369	0.551765	0.107167	0.0114849	0.930176	0.440979	0.499593	1.33016	0.652363	0.153368	1.50914	0.0834105	0.300235	1.31799	0.235096	0.0552701	0.873487	0.13551	0.162538	0.557488	0.711185	0.0639124	4.50291	0.0363662	0.105388	0.556069	0.0898675
29	2	1	0	0.39792	0.414486	0.729498	0.451694	0.0524596	2.14067	0.0288742	0.185088	0.561471	0.11614	0.0134884	0.942067	0.452388	0.473452	1.04028	0.815925	0.11407	3.38762	0.0662117	0.1693	0.986102	0.139804	0.0195452	0.977038	0.341889	0.358625	0.640911	0.510747	0.0553634	2.64035	0.0310238	0.162525	0.523346	0.108397	0.0117499	1.01862	0.721128	0.729097	0.946653	0.357992	0.0385283	1.82016	0.0210826	0.171834	0.458311	0.107623
29	3	1	0	0.795828	0.861537	1.8307	0.498191	0.164712	0.867471	0.094823	0.407948	1.67612	0.33062	0.10931	0.810319	1.33897	1.38919	2.40159	0.48941	0.181497	0.768995	0.105759	0.485199	1.77749	0.370849	0.137529	0.894326	0.78624	0.822574	1.39326	0.437361	0.105939	1.02655	0.0602303	0.382015	1.03326	0.242224	0.0586723	0.91863	0.600781	0.630676	1.30516	0.384255	0.0738651	1.12653	0.0416276	0.229305	1.00621	0.192229
29	4	1	0	0.0287799	0.0358054	0.168214	0.620962	0.013239	16.7903	0.00763204	0.0211854	0.167642	0.0213202	0.00045455	1.00341	0.0311657	0.0442949	0.186037	0.411249	0.0129559	7.51826	0.00746181	0.023905	0.185832	0.0315038	0.000992492	0.758358	0.0294956	0.0357904	0.142098	0.662559	0.0134434	18.8108	0.00774424	0.0218662	0.141576	0.0202902	0.000411691	0.95115	0.0187376	0.0241915	0.0885702	0.440501	0.00674625	16.8006	0.00394054	0.013515	0.0883649	0.0153149
29	1	1	0	0.26335	0.299204	1.085	0.671911	0.095534	2.62988	0.0531651	0.143982	1.06193	0.142182	0.0202158	0.897532	0.164345	0.203704	0.622427	0.710161	0.085572	3.28391	0.0476804	0.134583	0.619157	0.120497	0.0145194	0.92247	0.352654	0.413597	1.23788	0.603063	0.130469	1.54163	0.0721558	0.310511	1.21706	0.216344	0.0468048	0.910642	0.12256	0.147283	0.502234	0.780375	0.063813	5.45676	0.0364877	0.0846119	0.493295	0.0817723
29	2	1	0	0.421297	0.46175	1.0843	0.357448	0.0676358	1.03041	0.0368922	0.267068	1.04661	0.189218	0.0358036	0.733903	0.499894	0.539184	1.31348	0.645566	0.130588	1.83824	0.0752188	0.26399	1.29367	0.202284	0.0409189	0.887495	0.313937	0.34562	0.827868	0.501504	0.0725788	1.97109	0.0412836	0.204889	0.789681	0.144722	0.0209446	0.922479	0.808196	0.822694	1.52614	0.322888	0.0497061	1.1376	0.0269591	0.198366	1.06446	0.153942
29	3	1	0	0.951231	1.00788	1.95743	0.604619	0.201921	1.0428	0.116306	0.373623	1.59139	0.333965	0.111533	0.777951	1.29562	1.35307	2.53291	0.545706	0.2134	0.82842	0.126684	0.477256	1.96299	0.391052	0.152922	0.769662	0.737909	0.784995	1.44647	0.583256	0.156576	1.23655	0.0891135	0.397887	1.2489	0.268451	0.072066	0.84519	0.54782	0.580108	1.2876	0.435143	0.0832484	1.34338	0.0491683	0.203867	1.05348	0.191313
29	4	1	0	0.032789	0.0411661	0.133849	0.392091	0.00976934	8.99893	0.0055866	0.030449	0.133455	0.024916	0.000620807	0.81487	0.0332581	0.0488931	0.176706	0.242897	0.00871416	3.98225	0.00512549	0.0254603	0.176035	0.035876	0.00128709	0.605011	0.0302299	0.0377244	0.129563	0.452475	0.0102217	11.3772	0.0058062	0.0265422	0.129008	0.0225906	0.000510337	0.849705	0.0193116	0.027514	0.100961	0.268779	0.00527297	7.84607	0.00301977	0.0140977	0.100618	0.0196183
29	1	1	0	0.298074	0.334338	0.775919	0.627479	0.0951428	2.28843	0.0526129	0.152838	0.734288	0.151627	0.0229908	0.812165	0.141288	0.165852	0.57127	0.779464	0.0677892	5.18912	0.0392485	0.101815	0.561457	0.086969	0.00756361	0.973655	0.461812	0.51184	1.07074	0.633777	0.140052	1.60394	0.0783234	0.295932	1.00423	0.220979	0.0488318	0.889923	0.0905957	0.107331	0.376015	0.674113	0.0388458	6.71946	0.022313	0.0635989	0.365256	0.0576251
29	2	1	0	0.368983	0.391265	0.708873	0.578725	0.0754114	2.46532	0.0418604	0.200125	0.707079	0.130306	0.0169797	0.964922	0.459777	0.487623	1.02013	0.879459	0.143016	3.12376	0.0826066	0.212246	0.968651	0.162618	0.0264446	0.977712	0.303148	0.328461	0.655684	0.533221	0.0675025	2.39589	0.0383965	0.20661	0.63076	0.126594	0.016026	0.967143	0.728824	0.73615	1.00535	0.440252	0.0456621	2.37383	0.0255363	0.133866	0.589194	0.103718
29	3	1	0	0.649622	0.712375	1.781	0.45578	0.133691	0.96327	0.0828786	0.241516	1.73491	0.293324	0.0860388	0.651409	0.686691	0.820007	2.06833	0.313378	0.140918	0.428266	0.0865985	0.56921	2.0531	0.449675	0.202207	0.594436	0.359134	0.419268	0.919	0.346568	0.0752308	0.918929	0.0433009	0.281821	0.897155	0.217074	0.047121	0.676741	0.19478	0.222017	0.56122	0.524961	0.056119	2.97877	0.0340411	0.137573	0.556533	0.106901
29	4	1	0	0.0243223	0.0308106	0.120977	0.493578	0.00934464	15.1768	0.00543991	0.0195374	0.120735	0.0189324	0.000358437	0.852721	0.0249591	0.0337169	0.107838	0.382127	0.008671	9.89827	0.00509663	0.0276802	0.107229	0.0226914	0.0005149	0.783262	0.0271597	0.033785	0.128412	0.497667	0.0100103	14.2496	0.0057652	0.0225003	0.12719	0.0201144	0.000404588	0.846822	0.0131624	0.0149619	0.0406124	0.571206	0.0040676	45.3706	0.00230073	0.00933325	0.0398947	0.00712108
29	1	1	0	0.229975	0.258918	0.683035	0.708939	0.0844047	3.27075	0.0463621	0.14108	0.674349	0.119058	0.0141748	0.938961	0.139869	0.177121	0.549053	0.620409	0.0674766	3.16776	0.0374717	0.104147	0.546611	0.108762	0.0118291	0.863935	0.342443	0.378915	0.84152	0.702436	0.114034	2.40995	0.0635131	0.211549	0.820635	0.162341	0.0263545	1.05161	0.114794	0.137362	0.42381	0.736913	0.0556392	5.63322	0.0321134	0.077005	0.41839	0.075503
29	2	1	0	0.327746	0.355999	0.716046	0.392799	0.0546342	1.56816	0.0303375	0.209035	0.684194	0.139089	0.0193459	0.90506	0.412142	0.443472	0.946935	0.622142	0.101936	2.15593	0.0578782	0.218241	0.915041	0.163848	0.026846	1.08978	0.26191	0.280633	0.587395	0.551596	0.0556353	3.05585	0.0310878	0.136731	0.557672	0.100862	0.0101732	1.0287	0.633097	0.652155	1.01901	0.228542	0.0357951	0.793841	0.0194736	0.193676	0.805146	0.156623
29	3	1	0	0.530393	0.605671	1.41553	0.463086	0.135586	0.921856	0.0790262	0.379485	1.40392	0.292789	0.0857251	0.898785	0.667894	0.731663	1.87205	0.474414	0.141897	0.938042	0.0839184	0.36371	1.70097	0.299101	0.0894612	0.954501	0.363936	0.400353	0.814539	0.453166	0.0756936	1.54669	0.0431527	0.235389	0.785564	0.167033	0.0279	0.965036	0.280785	0.310357	0.742937	0.454791	0.0602028	1.99876	0.0350245	0.177681	0.695955	0.132375
29	4	1	0	0.0278833	0.0330444	0.13949	0.669647	0.0118885	21.8466	0.00688563	0.0180472	0.13757	0.0177533	0.000315181	1.0181	0.0274366	0.0353296	0.100287	0.437537	0.00974995	11.6638	0.00579181	0.029235	0.0995858	0.0222837	0.000496565	0.768282	0.0324293	0.0387734	0.148217	0.680938	0.0144892	18.4655	0.00836055	0.0218759	0.14668	0.0212783	0.000452767	1.02509	0.0189622	0.0219148	0.0477458	0.556107	0.00611645	28.9435	0.00350132	0.0166284	0.0468623	0.0109987
30	1	1	0	0.270104	0.326119	1.22853	0.546398	0.0999686	1.64115	0.0549359	0.1926	1.21541	0.182959	0.0334741	0.81876	0.183521	0.217021	0.702793	0.736312	0.0853908	3.70708	0.0498575	0.135705	0.697084	0.115971	0.0134493	0.961373	0.388147	0.445159	1.19987	0.716057	0.156254	1.81528	0.0864397	0.285128	1.17861	0.218215	0.0476177	0.931121	0.124585	0.147482	0.41624	0.713051	0.0563444	5.14711	0.0321383	0.0959725	0.411271	0.0790187
30	2	1	0	0.462476	0.497576	1.28399	0.397557	0.073056	1.19829	0.0404646	0.212294	1.10283	0.183763	0.0337687	0.760449	0.34304	0.385465	1.14046	0.742347	0.130644	2.44197	0.0756317	0.206278	1.13655	0.175988	0.0309716	0.921093	0.184462	0.216568	0.646222	0.592907	0.0673476	2.95037	0.0380669	0.141778	0.632684	0.113589	0.0129024	0.867117	0.629668	0.662005	1.26457	0.228495	0.0467469	0.611027	0.0255749	0.231911	0.946097	0.204586
30	3	1	0	1.2056	1.30658	3.35269	0.435694	0.219674	0.471605	0.119888	0.666041	3.22055	0.504194	0.254212	0.727647	1.85107	1.96953	4.01354	0.393208	0.264814	0.318656	0.144531	1.02104	3.37683	0.67347	0.453562	0.760615	0.2551	0.301357	0.989665	0.606342	0.0973824	2.0755	0.0535364	0.210467	0.973059	0.160606	0.0257944	0.907652	0.360019	0.410316	1.09053	0.417673	0.0823004	1.15043	0.0446676	0.231723	1.05238	0.197045
30	4	1	0	0.030791	0.0403484	0.14022	0.398069	0.0103905	8.73666	0.00595256	0.030283	0.139754	0.0261023	0.000681331	0.887073	0.0352309	0.0460422	0.203479	0.605717	0.0179737	12.2755	0.0108087	0.0330709	0.201213	0.0296734	0.000880511	0.870752	0.0213148	0.0265795	0.114736	0.597638	0.00949995	21.8032	0.00550918	0.0152476	0.113904	0.0158958	0.000252677	0.89595	0.0142235	0.0169407	0.0625306	0.63311	0.00583215	39.0507	0.00331381	0.00959167	0.062199	0.0092119
30	1	1	0	0.330281	0.415629	1.6219	0.497942	0.125779	1.07773	0.0687645	0.207096	1.58171	0.252597	0.0638052	0.794197	0.177333	0.207927	0.710735	0.809276	0.0879593	4.26059	0.0503315	0.131693	0.70364	0.108689	0.0118133	0.979687	0.525457	0.607253	1.82075	0.638358	0.194526	1.15231	0.107003	0.34166	1.78852	0.304729	0.0928597	0.937377	0.125521	0.146453	0.440884	0.695634	0.0525459	5.20724	0.0297113	0.101877	0.435968	0.0755366
30	2	1	0	0.519991	0.547051	1.27831	0.50638	0.0861157	1.65502	0.0478646	0.195946	1.18516	0.170061	0.0289208	0.93525	0.391726	0.438385	1.16104	0.711014	0.140045	2.06067	0.0799437	0.245668	1.14818	0.196965	0.038795	1.00308	0.23056	0.254372	0.613412	0.677509	0.0728624	3.52934	0.0408197	0.153942	0.605924	0.107545	0.0115658	1.05502	0.825602	0.847354	1.43957	0.286345	0.0546673	0.803766	0.0292958	0.243902	1.02518	0.190914
30	3	1	0	1.2791	1.35398	2.99914	0.477941	0.212478	0.579242	0.114483	0.580205	2.44628	0.44457	0.197642	0.794515	1.87488	1.98263	3.70799	0.399915	0.258149	0.334109	0.139217	1.01515	3.01907	0.645508	0.416681	0.779416	0.397916	0.443404	1.11851	0.616298	0.120713	1.77269	0.0680081	0.273004	1.07216	0.195868	0.0383644	0.923633	0.443401	0.487958	1.31047	0.414638	0.0845704	1.10701	0.046052	0.191714	1.26106	0.203962
30	4	1	0	0.0349766	0.0479809	0.177161	0.405671	0.0133396	7.11037	0.00768835	0.0233878	0.175941	0.0328829	0.00108129	0.711825	0.0434753	0.05911	0.256242	0.504931	0.020245	7.49182	0.0120437	0.02756	0.253505	0.0400946	0.00160758	0.758364	0.0273445	0.0334944	0.145694	0.653666	0.0126585	19.1137	0.00716794	0.0189068	0.144194	0.0193653	0.000375017	0.859236	0.01279	0.0155439	0.0615544	0.587373	0.00519452	37.4632	0.00293	0.00919543	0.0609373	0.00884365
30	1	1	0	0.340743	0.390895	1.09527	0.572343	0.109772	1.60447	0.0590197	0.214264	1.06337	0.191793	0.0367846	0.819277	0.17303	0.202896	0.618504	0.798541	0.0847187	4.37305	0.0492208	0.126864	0.613764	0.106092	0.0112555	0.90587	0.480052	0.540827	1.30253	0.620268	0.154694	1.35107	0.0840354	0.343642	1.27986	0.249398	0.0621993	0.899594	0.110129	0.130243	0.345536	0.717687	0.0499647	5.83273	0.0282702	0.0880945	0.342024	0.0696191
30	2	1	0	0.623453	0.650512	1.10973	0.585766	0.108889	1.75498	0.0606444	0.216184	0.99925	0.185892	0.0345557	0.863934	0.498889	0.553275	1.40472	0.718082	0.171981	1.74388	0.10003	0.28187	1.39527	0.239501	0.0573607	0.804828	0.265951	0.302306	0.71693	0.679419	0.0977706	2.63445	0.0545547	0.206184	0.695871	0.143903	0.0207082	0.901386	1.0156	1.03978	1.5841	0.31853	0.0710886	0.777006	0.0387011	0.298641	1.16857	0.223177
30	3	1	0	1.40528	1.50385	3.32875	0.403245	0.216167	0.406005	0.116674	0.606855	2.78716	0.536069	0.28737	0.759894	2.11286	2.24225	4.54473	0.37579	0.28241	0.269993	0.152483	1.01083	3.71595	0.751511	0.564769	0.781555	0.353049	0.41455	1.24141	0.580888	0.126352	1.47817	0.069936	0.2361	1.2282	0.217515	0.0473127	0.905116	0.437244	0.481698	1.1344	0.398311	0.0805945	1.06053	0.0434202	0.286703	1.07288	0.202341
30	4	1	0	0.0416112	0.0525125	0.17856	0.532056	0.0170714	9.95659	0.0102502	0.0327859	0.177373	0.0320857	0.00102949	0.846007	0.0887393	0.117281	0.373974	0.334066	0.0256598	2.40344	0.01418	0.111163	0.371781	0.0768106	0.00589987	0.643507	0.0427533	0.0546675	0.176434	0.517199	0.0176497	8.68522	0.0101144	0.0377393	0.173379	0.0341256	0.00116455	0.721337	0.0240184	0.0293543	0.0936864	0.429722	0.00726395	14.1901	0.00405469	0.0189149	0.092886	0.0169038
30	1	1	0	0.380837	0.462309	1.39419	0.472463	0.123966	0.966707	0.0665529	0.252807	1.37279	0.262383	0.0688449	0.732202	0.17232	0.2036	0.470124	0.789384	0.0856942	4.28579	0.0505076	0.141267	0.464333	0.108558	0.0117849	0.953374	0.532767	0.620344	1.70674	0.581721	0.185066	0.993832	0.100586	0.350102	1.69559	0.318135	0.10121	0.840555	0.116236	0.137439	0.34769	0.68835	0.0505391	5.1922	0.027989	0.0987775	0.340089	0.0734206
30	2	1	0	0.66019	0.707335	1.56491	0.489769	0.124573	1.08435	0.0701513	0.317167	1.42627	0.254351	0.0646942	0.867749	0.514493	0.584142	1.47637	0.752242	0.208445	1.58388	0.121616	0.311161	1.43083	0.277098	0.0767834	0.770097	0.286186	0.325574	0.833383	0.660105	0.102643	2.29341	0.0554515	0.182722	0.796073	0.155495	0.0241787	0.783095	1.05855	1.09831	1.81891	0.291273	0.0854423	0.540717	0.0465281	0.43675	1.28975	0.293341
30	3	1	0	1.16574	1.21968	2.54748	0.577813	0.20756	0.873967	0.112774	0.414982	2.2357	0.359216	0.129036	0.775899	1.86688	1.93639	3.14992	0.506783	0.260949	0.539641	0.143077	0.775397	2.33317	0.514912	0.265134	0.857532	0.384087	0.439157	1.34612	0.538392	0.114804	1.42689	0.0648792	0.289088	1.33977	0.213235	0.045469	0.95565	0.369596	0.42623	1.17198	0.420876	0.089483	1.08727	0.0491484	0.246307	1.12445	0.212611
30	4	1	0	0.0375127	0.0565032	0.226495	0.332582	0.0140668	4.49509	0.00804146	0.0258462	0.225833	0.0422959	0.00178894	0.640837	0.0434544	0.0627325	0.39812	0.394019	0.0178449	4.92119	0.010094	0.0309114	0.396417	0.0452894	0.00205113	0.711662	0.0338374	0.0458554	0.156206	0.476968	0.0147756	8.59456	0.00824774	0.0260884	0.154367	0.0309782	0.000959647	0.675188	0.0169478	0.020374	0.0984055	0.6118	0.00692512	29.8667	0.00382669	0.0120909	0.0975785	0.0113193
30	1	1	0	0.285422	0.344988	1.16317	0.514391	0.0998135	1.45277	0.0547002	0.19122	1.15007	0.194042	0.0376523	0.805794	0.126358	0.146796	0.435623	0.752546	0.0563041	5.83687	0.0326734	0.088258	0.431544	0.0748181	0.00559775	0.934131	0.425765	0.49056	1.49592	0.63584	0.155141	1.43766	0.0855884	0.295967	1.4639	0.243994	0.0595332	0.873046	0.0967995	0.112979	0.268902	0.716998	0.0418274	6.89623	0.0234692	0.0763814	0.263696	0.0583369
30	2	1	0	0.469711	0.495747	1.00546	0.536098	0.0850706	1.86621	0.0469928	0.193564	0.888929	0.158685	0.0251809	0.985084	0.332412	0.388888	0.990451	0.690318	0.139451	1.94894	0.0795322	0.24726	0.976841	0.20201	0.040808	0.918658	0.19229	0.21636	0.55777	0.700307	0.0695154	3.99247	0.0393394	0.125304	0.548998	0.0992642	0.00985339	1.01365	0.83309	0.8655	1.40667	0.246398	0.0578632	0.569666	0.0314159	0.362569	1.08041	0.234836
30	3	1	0	1.14886	1.23003	3.13316	0.536378	0.235957	0.673287	0.130294	0.452475	2.8947	0.439908	0.193519	0.859886	1.80667	1.90335	4.11575	0.510732	0.30622	0.47567	0.170997	0.846469	3.3759	0.599571	0.359486	0.891293	0.284506	0.329787	0.804653	0.639766	0.10682	2.13377	0.0594848	0.221925	0.792472	0.166967	0.0278779	0.952253	0.275271	0.304328	0.946919	0.553825	0.0719519	2.3884	0.0403132	0.151176	0.899345	0.129918
30	4	1	0	0.0321351	0.0422285	0.14706	0.440501	0.0120814	9.111	0.00685339	0.0281402	0.146612	0.0274265	0.000752211	0.808554	0.0386019	0.0492519	0.151873	0.537306	0.0164531	10.2203	0.00958331	0.0278792	0.150007	0.0306215	0.000937677	0.804841	0.0268424	0.0338563	0.127794	0.550574	0.0113725	15.14	0.00645961	0.0193162	0.126769	0.0206557	0.000426657	0.868191	0.01209	0.0139533	0.0469769	0.719606	0.00501827	58.3622	0.00283825	0.00923827	0.0468012	0.00697364
32	1	1	0	0.314486	0.345977	0.94433	0.59586	0.0860355	2.21853	0.0462522	0.165028	0.915045	0.144389	0.0208481	0.826024	0.232747	0.27185	0.704522	0.661912	0.0930885	2.62885	0.0519946	0.199423	0.693085	0.140636	0.0197785	0.939017	0.406044	0.460767	1.14609	0.52832	0.115203	1.30047	0.0618351	0.321526	1.12135	0.218056	0.0475484	0.825653	0.148117	0.170343	0.445102	0.604289	0.0509004	4.04771	0.0287185	0.117087	0.438099	0.0842318
32	2	1	0	0.693017	0.731079	1.59809	0.419248	0.0976954	0.985607	0.0535194	0.263369	1.36601	0.233026	0.0543009	0.846566	0.426669	0.479876	1.19902	0.651479	0.143207	1.67523	0.0809472	0.293201	1.1896	0.219818	0.0483201	0.985016	0.311251	0.371502	0.976655	0.420198	0.0853013	1.1273	0.046456	0.285414	0.962922	0.203002	0.04121	0.802853	0.934844	1.00175	1.99728	0.288966	0.104112	0.434161	0.0563585	0.473591	1.85518	0.360292
32	3	1	0	0.618496	0.68967	1.89491	0.480929	0.14688	0.872575	0.081389	0.392262	1.83437	0.305409	0.0932745	0.750909	0.754757	0.825078	1.97657	0.464153	0.154846	0.766044	0.0852575	0.391103	1.87299	0.33361	0.111296	0.812873	0.528148	0.58343	1.84851	0.421218	0.10451	0.916444	0.0564167	0.299772	1.67293	0.248114	0.0615604	0.778211	0.136124	0.168292	0.614918	0.347977	0.0344657	1.88768	0.0185184	0.111625	0.610587	0.0990459
32	4	1	0	0.0376269	0.0560915	0.41362	0.324079	0.013491	4.35268	0.00754293	0.025605	0.412124	0.0416286	0.00173294	0.739298	0.0404853	0.0603382	0.331498	0.334806	0.0149898	4.22792	0.00847485	0.0309384	0.330445	0.0447716	0.0020045	0.689286	0.0403525	0.0547778	0.243909	0.414118	0.0153517	6.23606	0.00856988	0.0313618	0.242477	0.0370708	0.00137425	0.760901	0.0211697	0.0320894	0.26825	0.29447	0.00710645	6.52896	0.00380249	0.0135489	0.267538	0.024133
32	1	1	0	0.299076	0.329568	0.893841	0.561989	0.077905	2.18926	0.0420699	0.165523	0.857944	0.138624	0.0192165	0.847145	0.255791	0.297489	0.751636	0.634771	0.0965363	2.32748	0.0538311	0.210127	0.743964	0.152081	0.0231285	0.892386	0.393481	0.441887	1.03119	0.496059	0.0998768	1.3024	0.0527968	0.318962	1.02603	0.20134	0.0405379	0.80617	0.165414	0.185231	0.457392	0.667554	0.0557162	4.47431	0.0311684	0.105076	0.44619	0.0834631
32	2	1	0	0.821323	0.876598	1.86512	0.348761	0.106946	0.625294	0.0587979	0.297822	1.55254	0.306647	0.0940324	0.737556	0.674147	0.75382	1.95077	0.524639	0.177128	0.874323	0.0996613	0.395185	1.90041	0.337619	0.113987	0.893908	0.372265	0.44497	1.35869	0.387381	0.0945163	0.859895	0.0511896	0.348367	1.33977	0.243988	0.0595301	0.767268	0.978449	1.03813	2.30533	0.274036	0.0951609	0.414501	0.0499834	0.433984	2.07945	0.347256
32	3	1	0	0.955784	1.05411	2.75241	0.474903	0.211317	0.57103	0.113062	0.431517	2.71696	0.444968	0.197997	0.760476	1.25133	1.33568	3.18675	0.51529	0.240949	0.605888	0.132477	0.503164	3.08636	0.467599	0.218649	0.784596	1.03485	1.10566	2.53774	0.402512	0.156857	0.552606	0.0839198	0.443827	2.36683	0.389695	0.151862	0.722804	0.235884	0.288743	0.835989	0.368476	0.0614205	1.18749	0.0329944	0.200872	0.829715	0.166688
32	4	1	0	0.0226179	0.0268889	0.0851369	0.606354	0.00882607	23.5386	0.00498727	0.0186203	0.0837824	0.014556	0.000211876	0.912789	0.0282553	0.0351717	0.103218	0.526035	0.0110289	14.4542	0.00635374	0.0234044	0.102707	0.0209661	0.000439579	0.875861	0.0293092	0.0349539	0.0923848	0.541773	0.0103291	15.8121	0.00574753	0.0259475	0.0907909	0.0190654	0.000363488	0.855348	0.0183505	0.0208201	0.0539278	0.592277	0.00583123	32.419	0.00314246	0.0125783	0.0519905	0.00984544
32	1	1	0	0.250567	0.309318	1.1859	0.483394	0.0877599	1.43712	0.0473679	0.163687	1.17455	0.181549	0.0329602	0.80354	0.253371	0.306386	1.09663	0.552093	0.0952034	1.78715	0.0531424	0.18627	1.09078	0.172441	0.0297358	0.854231	0.311651	0.378445	1.20618	0.451557	0.0970453	1.1231	0.0518729	0.255441	1.20435	0.214912	0.0461874	0.734056	0.16955	0.190027	0.511756	0.661698	0.0568372	4.35477	0.03213	0.11132	0.496827	0.0858959
32	2	1	0	0.820968	0.897491	2.20561	0.378508	0.137393	0.566736	0.0746718	0.34285	2.14957	0.362984	0.131758	0.675739	0.740561	0.857105	2.39912	0.525275	0.22688	0.674053	0.125752	0.433411	2.37417	0.431927	0.186561	0.851271	0.440074	0.534066	1.38962	0.367588	0.111337	0.651857	0.0598006	0.382899	1.36927	0.302884	0.0917387	0.67813	0.949045	1.00693	1.94807	0.339802	0.114453	0.54028	0.0612942	0.455613	1.76855	0.336822
32	3	1	0	1.0555	1.14056	2.50332	0.553424	0.239481	0.684056	0.128091	0.514175	2.45077	0.432726	0.187252	0.75916	1.38537	1.45843	2.82314	0.581685	0.265471	0.702066	0.14623	0.589539	2.64558	0.456383	0.208285	0.799517	1.19119	1.25867	2.76194	0.470565	0.191573	0.616274	0.102142	0.493216	2.4233	0.407113	0.165741	0.738973	0.29137	0.356101	1.13649	0.356316	0.0730376	0.926513	0.0389289	0.224472	1.13421	0.20498
32	4	1	0	0.0233952	0.0287021	0.128319	0.571191	0.00950697	19.6494	0.0054434	0.0177071	0.127988	0.0166441	0.000277027	0.822133	0.0279881	0.0397752	0.200382	0.456314	0.0129092	9.03918	0.00723433	0.0260296	0.199688	0.0282901	0.00080033	0.732767	0.0277137	0.0366205	0.156766	0.420181	0.0100682	9.8045	0.00562932	0.0208518	0.156307	0.0239616	0.000574157	0.641203	0.0142573	0.0171941	0.057849	0.487609	0.00469095	28.1607	0.00260628	0.0103034	0.0571712	0.00962032
32	1	1	0	0.375278	0.435684	1.43152	0.474473	0.105136	1.15044	0.0564866	0.176289	1.42326	0.221585	0.0490999	0.707139	0.330433	0.387079	1.20438	0.612451	0.123615	1.6889	0.0688023	0.254901	1.17525	0.201837	0.040738	0.948023	0.389582	0.459845	1.31487	0.533296	0.130435	1.16296	0.069569	0.310202	1.29632	0.244583	0.0598207	0.807144	0.196177	0.217261	0.565494	0.631438	0.0590218	3.8527	0.0336611	0.11617	0.545672	0.093472
32	2	1	0	0.910656	0.972579	2.25534	0.422992	0.144584	0.675937	0.078974	0.337331	2.11293	0.341813	0.116836	0.722306	0.845875	0.971226	2.82398	0.473853	0.226364	0.543265	0.123976	0.551968	2.74782	0.477709	0.228206	0.804505	0.445036	0.542626	1.5717	0.339199	0.105407	0.584012	0.056397	0.408713	1.56815	0.310754	0.0965682	0.658948	0.871335	0.929002	1.62581	0.324905	0.104786	0.535423	0.0556921	0.525355	1.31509	0.322514
32	3	1	0	0.967316	1.03606	2.40473	0.505832	0.187872	0.735396	0.101446	0.38517	2.3846	0.371413	0.137947	0.824538	1.15978	1.23472	2.82343	0.524478	0.222363	0.674532	0.121247	0.587758	2.61534	0.42397	0.17975	0.880796	0.970241	1.04081	2.70186	0.375005	0.141389	0.53352	0.0758417	0.482204	2.37909	0.377032	0.142153	0.764069	0.246657	0.296872	0.880296	0.367936	0.0608365	1.20464	0.0329337	0.22869	0.872206	0.165346
32	4	1	0	0.0303138	0.0391888	0.132279	0.397241	0.00987581	9.19872	0.00568546	0.0222516	0.131766	0.024861	0.00061807	0.793449	0.0334733	0.0459498	0.293104	0.401176	0.0126412	7.44122	0.00738842	0.0273715	0.292643	0.0315104	0.000992904	0.795874	0.0333043	0.042733	0.229045	0.451818	0.0121098	9.25491	0.0066484	0.0272811	0.228163	0.0268023	0.000718364	0.783001	0.0153913	0.017805	0.0498569	0.526526	0.00471778	31.8133	0.00255414	0.0114433	0.0491941	0.0089602
32	1	1	0	0.323961	0.37509	1.12423	0.505937	0.0957398	1.41631	0.0507166	0.177923	1.08685	0.189232	0.0358089	0.749672	0.277265	0.341057	1.25087	0.6185	0.122953	1.72809	0.0682919	0.255873	1.24631	0.198793	0.0395187	0.932077	0.367499	0.426956	1.02128	0.55568	0.120885	1.36775	0.0647296	0.321691	1.00919	0.217545	0.0473256	0.853331	0.166638	0.18653	0.510243	0.632667	0.0530767	4.2557	0.0299522	0.107188	0.498	0.0838936
32	2	1	0	0.936679	1.05488	3.31454	0.30761	0.149368	0.337936	0.0796798	0.375941	3.26398	0.485575	0.235783	0.611609	0.837679	1.02972	3.5779	0.383316	0.229736	0.352836	0.126741	0.516004	3.55112	0.599338	0.359206	0.712698	0.417937	0.54859	2.04001	0.309446	0.110054	0.465225	0.0588441	0.391286	2.02683	0.355648	0.126485	0.652471	0.845756	0.909212	1.85218	0.330982	0.110542	0.523951	0.058443	0.526512	1.62969	0.33398
32	3	1	0	0.938619	1.04893	2.94034	0.487747	0.228578	0.569648	0.125108	0.515997	2.90743	0.46864	0.219624	0.780273	1.20599	1.29642	3.19385	0.509884	0.242761	0.587223	0.133112	0.582012	3.05848	0.47611	0.22668	0.859038	0.919077	0.994356	2.68856	0.415934	0.157993	0.589518	0.0850601	0.375313	2.35444	0.379852	0.144288	0.720687	0.213387	0.262772	0.761409	0.39795	0.0610767	1.42607	0.0335918	0.216125	0.759331	0.153478
32	4	1	0	0.0305589	0.0398848	0.134354	0.430292	0.0110403	9.74356	0.00641436	0.0239918	0.133626	0.0256577	0.000658318	0.815741	0.0416576	0.058336	0.242987	0.395102	0.0161519	5.51178	0.00921133	0.0411853	0.2424	0.0408804	0.00167121	0.663087	0.0385074	0.0501059	0.191928	0.421472	0.0135261	7.47201	0.00769559	0.0386732	0.19048	0.0320924	0.00102992	0.714086	0.0186675	0.021374	0.0643908	0.548118	0.00571193	28.9203	0.00314066	0.0130513	0.0641453	0.010421
33	1	1	0	0.111981	0.141659	0.645959	0.483792	0.042026	3.10071	0.0233981	0.0859708	0.642695	0.0868679	0.00754603	0.774085	0.0811527	0.094914	0.340881	0.692557	0.0341313	7.87721	0.0191323	0.0533554	0.33773	0.0492831	0.00242882	0.889418	0.136859	0.163252	0.626135	0.634912	0.0565755	4.03089	0.032006	0.101272	0.622249	0.0891076	0.00794017	0.870535	0.116549	0.137077	0.479148	0.681767	0.0492539	5.41871	0.0282817	0.0792273	0.465359	0.0722444
33	2	1	0	0.31106	0.341924	1.17967	0.274368	0.0389937	1.07772	0.0217685	0.104505	1.16678	0.142122	0.0201987	0.613354	0.135463	0.175531	0.697528	0.449195	0.0501998	2.28487	0.0285362	0.0995224	0.694671	0.111755	0.0124892	0.802879	0.102312	0.134339	0.573402	0.352712	0.0307411	2.26079	0.0171735	0.0821995	0.568374	0.0871564	0.00759624	0.73313	0.396364	0.432074	1.18945	0.243566	0.0419401	0.777435	0.023051	0.17211	1.17723	0.172192
33	3	1	0	0.44755	0.476679	0.929308	0.51924	0.0853216	1.74479	0.0471112	0.22892	0.917265	0.16432	0.0270011	0.825894	0.682944	0.713431	1.1393	0.485591	0.100338	1.29749	0.0553981	0.319918	0.925266	0.206631	0.0426962	0.854235	0.607139	0.638264	1.08611	0.265605	0.0523701	0.720279	0.0280025	0.294043	0.87418	0.197173	0.0388773	0.641437	0.269728	0.287577	0.5282	0.312914	0.0312548	1.75265	0.0174855	0.129442	0.510685	0.0998829
33	4	1	0	0.0283766	0.0357183	0.169889	0.443192	0.00962764	11.4183	0.00538837	0.015813	0.168743	0.0217234	0.000471905	0.722667	0.0295021	0.0401748	0.204405	0.449986	0.0122885	9.12076	0.00680191	0.0211739	0.203196	0.0273086	0.000745762	0.737352	0.0228636	0.0289586	0.12109	0.453481	0.00807092	13.9431	0.00441659	0.0196193	0.120078	0.0177977	0.000316758	0.756939	0.0141549	0.0166026	0.0641397	0.609143	0.00529289	40.3272	0.0030447	0.0089113	0.0630285	0.00868907
33	1	1	0	0.0732656	0.0839815	0.243931	0.631991	0.0259753	8.65705	0.0146241	0.0592327	0.240356	0.0411008	0.00168927	0.917415	0.0688916	0.07891	0.183144	0.768764	0.0296194	11.299	0.0167727	0.0519805	0.179239	0.0385285	0.00148445	0.922678	0.0910773	0.103513	0.253103	0.811979	0.0399927	9.21959	0.0223657	0.0690052	0.248237	0.0492533	0.00242589	0.92268	0.103798	0.116697	0.245756	0.776193	0.0414464	8.28376	0.0236191	0.0787583	0.243419	0.0533971
33	2	1	0	0.220022	0.244423	0.607301	0.365592	0.0389608	1.9678	0.0223483	0.117479	0.600847	0.106569	0.011357	0.794001	0.135283	0.158278	0.538732	0.725909	0.059705	5.08731	0.0344148	0.113718	0.535108	0.0822486	0.00676483	0.977464	0.0843024	0.0984859	0.302844	0.582581	0.029695	6.53757	0.0169852	0.0635624	0.299401	0.0509715	0.00259809	0.899761	0.228225	0.2668	0.653155	0.282829	0.0391247	1.14443	0.0218999	0.177982	0.642665	0.138333
33	3	1	0	0.328696	0.375489	1.04834	0.378159	0.0687118	1.16085	0.0383257	0.20507	1.01444	0.181701	0.0330152	0.819891	0.383481	0.431433	1.12499	0.372541	0.0737156	1.04554	0.0409365	0.271061	1.09431	0.197873	0.0391536	0.8812	0.2952	0.332045	0.867746	0.268853	0.0409115	0.955901	0.0221347	0.19903	0.832909	0.15217	0.0231558	0.640301	0.131217	0.152935	0.420198	0.369742	0.0290743	2.60623	0.0161151	0.102812	0.410335	0.0786339
33	4	1	0	0.033943	0.0481258	0.286395	0.409983	0.0140049	7.09335	0.00827709	0.0253231	0.285701	0.0341596	0.00116688	0.729772	0.0471946	0.0702961	0.34679	0.345125	0.0180028	3.78378	0.0102956	0.0311132	0.345095	0.0521632	0.00272099	0.635335	0.0375892	0.0547071	0.26959	0.312924	0.0124537	4.34439	0.00688093	0.0253401	0.267669	0.0397978	0.00158387	0.614377	0.0237627	0.0320059	0.131021	0.451111	0.00968425	11.9433	0.00550416	0.0164194	0.130113	0.0214676
33	1	1	0	0.0549681	0.0669143	0.232784	0.570622	0.021802	8.40777	0.0122737	0.0422682	0.228069	0.0382074	0.00145981	0.925941	0.0593151	0.0671829	0.193243	0.696873	0.0220133	12.391	0.0123643	0.0418284	0.187893	0.0315887	0.000997848	0.997292	0.0614952	0.0752396	0.291793	0.605325	0.0262757	7.74523	0.0145937	0.0509438	0.28942	0.0434076	0.00188422	0.805882	0.0719734	0.0841834	0.24064	0.656693	0.0287121	8.60786	0.0164551	0.045858	0.236805	0.0437222
33	2	1	0	0.220017	0.240903	0.613831	0.466356	0.0457962	2.67027	0.0257501	0.1104	0.60277	0.0982001	0.00964326	0.901588	0.164927	0.199126	0.749687	0.587446	0.065604	3.02504	0.0377274	0.123096	0.741096	0.111677	0.0124717	0.977031	0.111436	0.143356	0.555142	0.4421	0.0399043	2.77765	0.0226295	0.0911453	0.548859	0.0902607	0.00814699	0.833646	0.259329	0.284792	0.583885	0.374327	0.0440983	1.77162	0.0245874	0.145396	0.567349	0.117807
33	3	1	0	0.367876	0.423764	1.16156	0.462137	0.0973137	1.21951	0.0540747	0.238529	1.12968	0.210573	0.0443412	0.818617	0.367997	0.426428	1.04924	0.484879	0.104583	1.27039	0.059101	0.288214	1.01772	0.21569	0.0465221	0.767838	0.294674	0.345746	0.778957	0.268314	0.048579	0.799391	0.0262042	0.298152	0.776039	0.181053	0.0327802	0.637468	0.0976325	0.116811	0.377865	0.471305	0.0302583	4.18866	0.0172647	0.0716266	0.374323	0.0642011
33	4	1	0	0.043272	0.0515303	0.165275	0.56383	0.0157974	11.4807	0.00901253	0.0378459	0.163932	0.0280181	0.000785013	0.928374	0.0516402	0.0599853	0.15099	0.693841	0.0212053	12.948	0.0120941	0.044606	0.148853	0.0305623	0.000934052	0.820292	0.0364496	0.0424097	0.114277	0.632696	0.0137352	16.2831	0.00767392	0.0285535	0.111448	0.021709	0.000471282	0.8038	0.027049	0.0310575	0.0776422	0.751652	0.0114871	27.7436	0.0064796	0.0206106	0.0766335	0.0152825
33	1	1	0	0.0726826	0.0871724	0.313031	0.561644	0.0270741	6.38428	0.0148354	0.0496726	0.307989	0.0482052	0.00232374	0.904102	0.0716365	0.0822236	0.191276	0.767661	0.0310327	10.5857	0.017299	0.0596797	0.185726	0.040425	0.00163418	0.832494	0.0769411	0.0915776	0.283923	0.719375	0.0357847	8.10154	0.0200471	0.0621783	0.280319	0.0497441	0.00247448	0.828538	0.0925543	0.108227	0.328577	0.606926	0.0341014	6.02357	0.0190164	0.0679057	0.326232	0.0561871
33	2	1	0	0.274654	0.3111	0.700622	0.301263	0.0440705	1.16261	0.0248794	0.198524	0.685863	0.146286	0.0213995	0.748855	0.158404	0.177986	0.478654	0.76446	0.0621195	5.49152	0.0362609	0.103123	0.475509	0.0812593	0.00660307	0.928269	0.0992873	0.119839	0.395849	0.567172	0.0381077	4.67702	0.0211137	0.0742743	0.394329	0.0671889	0.00451435	0.846139	0.335749	0.379657	0.795808	0.248848	0.0441577	0.769021	0.0242149	0.254257	0.73666	0.177449
33	3	1	0	0.41338	0.472384	1.3375	0.405117	0.0927416	0.990779	0.0519237	0.269382	1.2977	0.228926	0.0524069	0.729518	0.533149	0.589704	1.31193	0.421369	0.10633	0.950783	0.0605434	0.311563	1.27477	0.252344	0.0636774	0.781915	0.423127	0.477445	1.0597	0.220411	0.0488155	0.536789	0.02633	0.305006	1.01248	0.221475	0.0490511	0.573047	0.149418	0.167918	0.482511	0.504766	0.0387288	3.8113	0.0224368	0.0951213	0.466224	0.0767262
33	4	1	0	0.042434	0.0494635	0.128035	0.704939	0.0179469	15.9488	0.0103372	0.0351602	0.125087	0.0254587	0.000648148	0.900859	0.0747144	0.0813005	0.187246	0.633144	0.0203293	10.7241	0.011056	0.0473912	0.179434	0.0321085	0.00103095	0.843614	0.037325	0.0442741	0.161335	0.627243	0.0149612	14.5851	0.00829791	0.0233562	0.159649	0.0238523	0.00056893	0.750789	0.0395139	0.0437038	0.116544	0.767295	0.0143515	23.2618	0.00813795	0.0186384	0.109585	0.0187041
33	1	1	0	0.0557233	0.0663122	0.190953	0.553525	0.0199289	8.81585	0.0114276	0.0498179	0.186844	0.0360035	0.00129625	0.811255	0.0516031	0.0595814	0.165531	0.698644	0.0208407	13.3587	0.0118871	0.0360536	0.161413	0.0298301	0.000889838	0.780092	0.0530037	0.0623888	0.161222	0.72631	0.0239391	12.3794	0.0134484	0.0459243	0.159448	0.0329599	0.00108635	0.857791	0.0785375	0.0898456	0.227158	0.698671	0.0305347	9.0408	0.0172683	0.0575211	0.222195	0.043704
33	2	1	0	0.216572	0.236299	0.630257	0.388373	0.0367475	2.32891	0.0208502	0.116022	0.611958	0.0946191	0.00895278	0.83299	0.117012	0.140658	0.513232	0.62892	0.0491433	4.63676	0.0283108	0.102359	0.505899	0.0781392	0.00610573	0.897489	0.0641931	0.0761753	0.273115	0.634816	0.0260623	8.64028	0.0145632	0.0476316	0.270104	0.0410549	0.0016855	0.888773	0.18619	0.218289	0.515646	0.328288	0.0374461	1.60968	0.0209433	0.156956	0.504442	0.114065
33	3	1	0	0.323519	0.376973	1.10732	0.43294	0.0838689	1.22459	0.0459557	0.221289	1.09557	0.19372	0.0375273	0.833959	0.373017	0.434058	1.1002	0.431248	0.0958248	1.10561	0.0545888	0.299085	1.08678	0.222204	0.0493745	0.915892	0.280214	0.334423	0.9145	0.249158	0.0455308	0.737022	0.0246117	0.24995	0.903341	0.182739	0.0333934	0.606313	0.117581	0.139294	0.450797	0.372441	0.0278459	2.77949	0.0155372	0.0805415	0.446115	0.074766
33	4	1	0	0.0608285	0.0691841	0.189511	0.600554	0.019837	11.2274	0.0122497	0.0396342	0.186851	0.0330311	0.00109106	0.863401	0.103939	0.116762	0.303305	0.410332	0.0218764	4.1562	0.0118135	0.0625886	0.299686	0.0533141	0.00284239	0.666921	0.0363316	0.0437583	0.151366	0.529426	0.0129401	12.147	0.00725653	0.0229501	0.149249	0.0244417	0.000597395	0.727143	0.0378163	0.0420229	0.100542	0.773025	0.0141973	23.7145	0.00799907	0.0235878	0.099348	0.0183659
34	1	1	0	0.182039	0.204449	0.642737	0.966811	0.0900975	6.39164	0.055508	0.135793	0.624674	0.0931905	0.00868446	1.03678	0.350724	0.393364	0.799881	0.422583	0.075374	1.24421	0.0395832	0.273168	0.787699	0.178365	0.031814	0.733135	0.263796	0.30439	0.694214	0.341167	0.051884	1.19267	0.0275838	0.188098	0.682138	0.152078	0.0231277	0.696462	0.251114	0.286197	0.836458	0.312444	0.0429564	1.19856	0.0226553	0.144394	0.810022	0.137485
34	2	1	0	0.439994	0.509706	1.45254	0.629641	0.162216	1.48546	0.0985965	0.342179	1.43218	0.257633	0.0663746	0.920942	0.639065	0.758677	2.02197	0.609461	0.249516	0.830927	0.139274	0.499602	1.99676	0.409405	0.167612	0.850555	0.327641	0.377278	1.03246	0.771787	0.14455	2.35374	0.0825659	0.212106	1.01599	0.187293	0.0350786	0.901308	0.614844	0.693862	1.58337	0.780849	0.251422	1.34939	0.139898	0.431451	1.56564	0.321985
34	3	1	0	0.79206	0.960328	3.12125	0.566028	0.307854	0.565096	0.167162	0.417752	3.06052	0.543885	0.295811	0.782917	1.11672	1.30129	3.8312	0.681043	0.455695	0.56602	0.253414	0.733157	3.81444	0.669113	0.447713	0.824815	0.384648	0.424704	0.91554	0.587053	0.105869	1.80191	0.0586026	0.26548	0.907651	0.18034	0.0325225	0.865253	0.69738	0.786663	1.85243	0.682652	0.248884	1.01672	0.135144	0.483234	1.78879	0.364584
34	4	1	0	0.146516	0.162218	0.345004	0.984077	0.0686227	8.27766	0.0402518	0.100892	0.325709	0.0697331	0.00486271	0.910173	0.206032	0.23673	0.527429	0.628514	0.0733883	2.92897	0.0399336	0.155566	0.52248	0.116765	0.013634	0.836709	0.275636	0.299021	0.631045	0.457665	0.0531355	2.08387	0.0280895	0.153028	0.604935	0.116101	0.0134795	0.666194	0.165468	0.185566	0.371689	0.5081	0.0427441	3.22615	0.0228317	0.114731	0.364245	0.0841254
34	1	1	0	0.180642	0.203121	0.48268	0.985576	0.0916766	6.37835	0.0551881	0.119593	0.468412	0.0930183	0.00865241	0.934259	0.344056	0.375494	0.756435	0.524022	0.0789332	1.88486	0.042766	0.201517	0.737121	0.15063	0.0226893	0.781551	0.237031	0.274717	0.75061	0.480798	0.0668694	1.84632	0.0357139	0.164045	0.748349	0.13908	0.0193433	0.752658	0.267583	0.297703	0.64645	0.433492	0.0566486	1.74998	0.0298848	0.182339	0.636971	0.13068
34	2	1	0	0.488358	0.55722	1.43854	0.64898	0.174332	1.44754	0.104453	0.355874	1.42178	0.268624	0.0721591	0.984283	0.737287	0.86848	2.33599	0.617495	0.283731	0.740718	0.156387	0.59094	2.29205	0.459487	0.211128	0.861245	0.397135	0.456785	1.36857	0.845591	0.191051	2.12729	0.108594	0.283683	1.35289	0.225938	0.051048	0.885895	0.712177	0.802272	1.94842	0.74679	0.276153	1.11594	0.152596	0.504322	1.9241	0.369787
34	3	1	0	0.768299	0.919327	3.31817	0.613596	0.310416	0.673398	0.172343	0.449665	3.27157	0.505896	0.255931	0.877977	1.19593	1.36518	3.96786	0.853686	0.563207	0.75015	0.326504	0.799141	3.95274	0.659735	0.435251	0.72731	0.430538	0.478624	0.929751	0.593774	0.124407	1.54071	0.0676339	0.317411	0.919728	0.209519	0.043898	0.799693	0.869156	0.958659	1.98809	0.776155	0.314578	1.04762	0.172094	0.575493	1.95321	0.405304
34	4	1	0	0.132925	0.149451	0.402702	0.880483	0.0602266	7.74079	0.0362177	0.0879502	0.396713	0.0684018	0.0046788	1.05866	0.141859	0.165495	0.51132	0.583817	0.0498267	3.73117	0.0271779	0.105874	0.507529	0.0853464	0.00728401	0.889862	0.254603	0.282094	0.616594	0.438005	0.053273	1.90555	0.0281888	0.157828	0.614292	0.121627	0.014793	0.678357	0.185096	0.205778	0.511926	0.40813	0.0367444	2.36157	0.019142	0.126942	0.49907	0.0900311
34	1	1	0	0.209044	0.234382	0.634092	0.981246	0.104134	5.58523	0.0629029	0.148461	0.625392	0.106124	0.0112624	1.08339	0.248058	0.285842	0.698724	0.515602	0.0733188	1.95166	0.0394645	0.20456	0.688905	0.1422	0.0202209	0.801779	0.415277	0.466349	1.04328	0.341923	0.0726404	0.849318	0.0383327	0.296289	1.03055	0.212447	0.0451335	0.690504	0.251087	0.278338	0.587624	0.417646	0.0502248	1.8122	0.0262076	0.18125	0.568523	0.120257
34	2	1	0	0.554659	0.646685	1.65077	0.523765	0.174354	0.946561	0.104892	0.450161	1.63687	0.332887	0.110814	0.951051	0.798281	0.940978	2.59729	0.652244	0.325315	0.724235	0.180164	0.575911	2.52212	0.498763	0.248764	0.860911	0.413951	0.467518	1.2381	0.912134	0.198434	2.40875	0.114	0.263405	1.21098	0.217549	0.0473276	0.896484	0.768417	0.878115	2.24475	0.75906	0.322974	0.992984	0.179773	0.551485	2.16759	0.425492
34	3	1	0	0.838704	0.991373	3.54144	0.618577	0.32747	0.649621	0.18206	0.443413	3.50588	0.529392	0.280256	0.78511	1.22395	1.38902	4.1341	0.873129	0.574306	0.743527	0.321682	0.780232	4.10398	0.657756	0.432643	0.879704	0.537085	0.592792	1.18989	0.675568	0.169748	1.4283	0.090176	0.370516	1.15038	0.251267	0.0631352	0.773115	0.905675	1.0058	2.4492	0.779927	0.341733	0.967561	0.185757	0.659042	2.39952	0.438161
34	4	1	0	0.145217	0.162463	0.413829	0.912136	0.0665161	7.49298	0.0398464	0.10093	0.399029	0.0729234	0.00531783	1.0582	0.202728	0.236115	0.619479	0.644812	0.078137	2.892	0.0424665	0.162596	0.612456	0.121178	0.0146841	0.914592	0.268546	0.304894	0.616791	0.459915	0.0664732	1.69708	0.035452	0.231163	0.609748	0.144534	0.02089	0.727944	0.268142	0.29024	0.606835	0.439383	0.048861	2.06577	0.0255458	0.152298	0.60059	0.111204
34	1	1	0	0.165034	0.184438	0.419428	0.927767	0.0764951	6.81617	0.0463371	0.103319	0.409234	0.0824507	0.00679812	1.00202	0.234307	0.27198	0.693964	0.574775	0.079479	2.23112	0.0426611	0.205917	0.689289	0.138278	0.0191209	0.799233	0.273876	0.304614	0.631478	0.396357	0.0529192	1.55295	0.0276828	0.18976	0.616764	0.133514	0.017826	0.67422	0.22412	0.250886	0.522441	0.453337	0.051181	2.12279	0.0270572	0.163898	0.519641	0.112898
34	2	1	0	0.542188	0.624637	1.77679	0.552838	0.17167	1.04308	0.100579	0.344654	1.77054	0.310524	0.0964255	0.914153	0.830112	0.973689	2.50268	0.647283	0.329784	0.706098	0.183289	0.545848	2.48928	0.50949	0.25958	0.842746	0.396647	0.445631	1.284	0.895153	0.182034	2.54408	0.105207	0.24527	1.27168	0.203356	0.0413535	0.930214	0.784893	0.889255	2.39829	0.761098	0.3185	1.00222	0.175509	0.530832	2.34752	0.418474
34	3	1	0	0.991883	1.10102	2.49868	0.713034	0.3412	0.825024	0.188914	0.587172	2.45501	0.478518	0.22898	0.91136	1.38822	1.53371	3.48936	0.900635	0.587947	0.797458	0.33985	0.843155	3.47258	0.652814	0.426166	0.924375	0.491831	0.544162	1.1791	0.788235	0.183763	1.88524	0.102464	0.301332	1.15199	0.233132	0.0543506	0.897169	1.20282	1.27849	2.27062	0.789184	0.342395	0.971521	0.182873	0.645194	2.12605	0.433859
34	4	1	0	0.172068	0.190495	0.409951	0.974405	0.0797263	7.30709	0.0489179	0.108271	0.407791	0.0818204	0.00669459	1.05645	0.19119	0.220343	0.512961	0.612709	0.0671803	3.06699	0.0368713	0.159649	0.504833	0.109645	0.012022	0.924967	0.343736	0.373243	0.808288	0.446248	0.0649733	1.61023	0.0341353	0.213932	0.785684	0.145599	0.021199	0.756982	0.226303	0.256229	0.70952	0.352452	0.0423962	1.55746	0.0225357	0.149734	0.707506	0.120289
34	1	1	0	0.172683	0.197471	0.548882	0.885963	0.0849965	5.63519	0.0518657	0.123925	0.539928	0.0959369	0.0092039	0.901265	0.262456	0.303331	0.66634	0.478542	0.0728867	1.71378	0.0397568	0.208052	0.642566	0.15231	0.0231984	0.802759	0.251991	0.283798	0.704986	0.506833	0.0662675	2.0692	0.0353732	0.170002	0.698597	0.130748	0.0170951	0.719518	0.247829	0.286492	0.628719	0.352	0.0506723	1.28913	0.0267149	0.198876	0.621166	0.143955
34	2	1	0	0.553742	0.634623	1.69363	0.546558	0.169616	1.04087	0.100244	0.372487	1.67712	0.310335	0.0963077	1.02411	0.83331	0.994325	2.9096	0.615977	0.334485	0.630671	0.185963	0.682888	2.85618	0.543015	0.294865	0.908357	0.371981	0.416624	1.07357	0.897464	0.168562	2.73265	0.096398	0.245871	1.05201	0.18782	0.0352764	1.01591	0.783178	0.890576	2.18517	0.781105	0.331503	1.03162	0.185813	0.545828	2.12743	0.424403
34	3	1	0	0.973723	1.11843	2.89572	0.639076	0.351967	0.630177	0.191145	0.615471	2.85972	0.550744	0.303319	0.895086	1.35906	1.52135	3.59959	0.834671	0.57122	0.678444	0.317754	0.89736	3.54045	0.684366	0.468356	1.01576	0.471271	0.52121	1.12097	0.757829	0.168872	1.85487	0.0921056	0.300677	1.09809	0.222837	0.0496562	0.948168	1.1083	1.20147	2.3557	0.752876	0.349583	0.870675	0.18772	0.658205	2.31085	0.46433
34	4	1	0	0.226807	0.255942	0.673224	1.04453	0.124058	5.50822	0.0777	0.162676	0.663034	0.11877	0.0141062	0.938189	0.25099	0.298326	0.960798	0.633816	0.102355	2.16204	0.056384	0.190564	0.956479	0.16149	0.0260791	0.835614	0.249527	0.291475	0.74665	0.369592	0.055759	1.285	0.0292474	0.192059	0.728223	0.150866	0.0227606	0.653223	0.453717	0.480976	0.875951	0.377952	0.0604178	1.24074	0.0317057	0.249471	0.813106	0.159856
35	1	1	0	0.0410051	0.0486725	0.14477	0.708441	0.0185998	15.6685	0.0108004	0.0283674	0.141486	0.0262546	0.000689305	0.936129	0.0503789	0.0616173	0.205801	0.678594	0.0241048	10.8197	0.0136522	0.0417338	0.204536	0.0355218	0.0012618	0.8549	0.0516102	0.0623718	0.238191	0.646206	0.0226604	10.9022	0.0134063	0.0398305	0.236522	0.0350669	0.00122969	0.983241	0.0389712	0.0447746	0.100164	0.553792	0.0122239	14.0979	0.00686879	0.0332497	0.0995202	0.0220731
35	2	1	0	0.388401	0.424427	0.78224	0.159786	0.0273726	0.507865	0.0149041	0.289758	0.703734	0.171308	0.0293465	0.477228	0.121982	0.16375	0.736091	0.489429	0.0535252	2.56452	0.0306721	0.0916187	0.732982	0.109363	0.0119602	0.779766	0.290216	0.318005	0.697741	0.154137	0.0200607	0.64368	0.010903	0.196156	0.59256	0.130148	0.0169386	0.455971	0.616858	0.659946	1.18876	0.116677	0.0273965	0.264235	0.0145682	0.367516	0.991513	0.234805
35	3	1	0	0.290266	0.329003	0.836052	0.469607	0.0728367	1.66029	0.0399409	0.198157	0.829502	0.155102	0.0240565	0.791847	0.59234	0.620725	1.24454	0.441063	0.0819599	1.32461	0.0457394	0.214773	0.955312	0.185824	0.0345305	0.788703	0.0574164	0.0627965	0.146158	0.401187	0.0102173	8.87522	0.00575648	0.0353025	0.144183	0.0254677	0.000648602	0.880243	0.215412	0.223532	0.418195	0.254061	0.0151893	2.32892	0.00832438	0.0524599	0.307394	0.0597859
35	4	1	0	0.0123623	0.0156094	0.05354	0.259433	0.00247622	15.7436	0.00143427	0.00851179	0.0530087	0.00954472	9.11017e-05	0.765107	0.0139666	0.016941	0.0504441	0.534448	0.00513212	33.5725	0.00309574	0.0103267	0.0499658	0.00960264	9.22107e-05	0.904291	0.00974822	0.0129175	0.0468429	0.258868	0.00219734	17.6324	0.00127043	0.00640393	0.0456742	0.00848826	7.20506e-05	0.73315	0.00480524	0.00582275	0.0180602	0.45635	0.00150296	77.4423	0.000839997	0.00456123	0.0177588	0.00329344
35	1	1	0	0.0381001	0.043373	0.117636	0.729143	0.0151288	20.1373	0.00866936	0.0255553	0.116792	0.0207488	0.000430513	0.940266	0.0413978	0.0493816	0.146153	0.63807	0.0171961	13.553	0.00984367	0.0313174	0.144487	0.0269501	0.000726309	0.88999	0.0414427	0.0487174	0.162079	0.542348	0.0139045	11.5506	0.00759205	0.032364	0.15968	0.0256376	0.000657284	0.890404	0.0195673	0.0236645	0.0749368	0.507456	0.00676093	21.4805	0.00381295	0.0155373	0.0747086	0.0133232
35	2	1	0	0.420317	0.44695	0.888819	0.214239	0.0325923	0.76337	0.0176672	0.226522	0.809952	0.152131	0.0231438	0.589473	0.136972	0.182423	0.75937	0.47707	0.0575364	2.18608	0.0317971	0.114727	0.756004	0.120604	0.0145453	0.791185	0.276281	0.294344	0.659965	0.204452	0.0207776	1.10427	0.0114047	0.113345	0.55786	0.101626	0.0103279	0.53662	0.644026	0.673839	1.1424	0.155563	0.0308657	0.424806	0.0167236	0.285993	0.90018	0.198413
35	3	1	0	0.225456	0.251392	0.548003	0.429297	0.0478351	2.18805	0.0271665	0.140303	0.531919	0.111426	0.0124159	0.684128	0.40957	0.430996	0.835917	0.433922	0.0583465	1.80779	0.0326853	0.164067	0.629621	0.134463	0.0180803	0.710082	0.023422	0.0274144	0.0661936	0.428874	0.00612184	17.115	0.00348725	0.0184305	0.0657741	0.0142742	0.000203753	0.745107	0.127136	0.130621	0.179316	0.264346	0.00793816	4.84129	0.0043657	0.0377634	0.133618	0.0300294
35	4	1	0	0.0157261	0.0277999	0.12549	0.175531	0.00402908	4.49336	0.00236742	0.0125594	0.125318	0.0229536	0.000526869	0.320477	0.0216978	0.0399684	0.171599	0.184588	0.00620382	3.23978	0.00365954	0.00977875	0.171089	0.033609	0.00112956	0.338062	0.00881318	0.0112845	0.0323551	0.334027	0.00235707	27.9373	0.00139113	0.0091496	0.0323027	0.00705653	4.97946e-05	0.765703	0.00662251	0.0100843	0.0422954	0.226544	0.00172507	16.9737	0.000984201	0.00447153	0.0420511	0.00761472
35	1	1	0	0.0388541	0.0447868	0.111589	0.663589	0.0148032	17.2223	0.00857047	0.0272893	0.109305	0.0223078	0.000497638	0.924126	0.0400917	0.0495891	0.149025	0.61587	0.0179995	11.94	0.0101988	0.029985	0.147392	0.0292262	0.000854171	0.881814	0.0462259	0.0537507	0.148962	0.625662	0.0171853	12.7422	0.00961341	0.0334041	0.148097	0.0274673	0.000754453	0.851051	0.0274674	0.0323169	0.0887186	0.464295	0.0079169	15.8173	0.00459893	0.0193594	0.0874894	0.0170515
35	2	1	0	0.380926	0.406127	0.744822	0.171765	0.0242102	0.665762	0.0132266	0.226834	0.587857	0.14095	0.0198669	0.516654	0.0991988	0.125666	0.481794	0.549026	0.0423899	4.05154	0.0241524	0.080608	0.474472	0.0772093	0.00596127	0.900627	0.272789	0.309532	0.708096	0.12114	0.0177344	0.463396	0.00993145	0.195063	0.688337	0.146396	0.0214319	0.400907	0.599605	0.644882	1.16044	0.106166	0.0252218	0.241179	0.0136121	0.289537	1.07351	0.23757
35	3	1	0	0.333946	0.461325	1.48671	0.277791	0.0885078	0.511283	0.0519024	0.475903	1.48033	0.318613	0.101514	0.618974	0.618738	0.81706	2.14414	0.218257	0.116589	0.234749	0.0669857	0.874041	2.14209	0.534181	0.28535	0.536671	0.0403329	0.0564385	0.221039	0.366142	0.01447	5.44274	0.00850073	0.0505531	0.220069	0.0395202	0.00156185	0.661246	0.149136	0.215594	0.647715	0.12558	0.0195721	0.449978	0.01093	0.250013	0.644265	0.155853
35	4	1	0	0.0156967	0.0218422	0.0689725	0.206888	0.00314742	7.99944	0.00185138	0.0139344	0.0688951	0.0152131	0.000231439	0.608437	0.0181954	0.0266088	0.0860155	0.246161	0.00478703	7.41697	0.00280491	0.0179631	0.0858888	0.0194467	0.000378174	0.591086	0.0158475	0.0214334	0.0696053	0.198198	0.00286476	8.0641	0.00168475	0.0120875	0.0692973	0.014454	0.000208919	0.610056	0.00774661	0.0104334	0.0298604	0.286596	0.00200626	23.3052	0.00114205	0.0072919	0.0295462	0.0070003
35	1	1	0	0.0261176	0.030899	0.0982683	0.607929	0.0100501	20.9953	0.00573795	0.021347	0.0965989	0.0165317	0.000273296	0.933878	0.0281812	0.0366727	0.138701	0.552285	0.0129767	13.6471	0.00753435	0.0208848	0.138268	0.0234965	0.000552085	0.885357	0.0309502	0.0371675	0.0987435	0.51855	0.0106847	14.1015	0.00598703	0.022097	0.0975065	0.020605	0.000424567	0.851986	0.0197877	0.0229007	0.0612136	0.609209	0.0070316	30.1552	0.00401734	0.0137219	0.0601814	0.0115422
35	2	1	0	0.330318	0.361628	0.836388	0.204408	0.0301101	0.756963	0.0164249	0.214145	0.781551	0.147304	0.0216983	0.606695	0.118642	0.165463	0.869325	0.463652	0.0535162	2.27251	0.0302755	0.106316	0.866924	0.115423	0.0133225	0.752098	0.245974	0.272211	0.594368	0.149172	0.0174071	0.733048	0.00998183	0.186256	0.559771	0.116691	0.0136169	0.470944	0.569666	0.619461	1.38394	0.107646	0.0262144	0.240561	0.0142661	0.35542	1.2939	0.243523
35	3	1	0	0.188147	0.231829	1.0428	0.340837	0.0462001	1.39933	0.0257105	0.113022	1.03806	0.135549	0.0183735	0.7314	0.359587	0.410556	1.31425	0.269252	0.0533868	0.767257	0.0301641	0.191292	1.26691	0.198278	0.0393142	0.680788	0.0333959	0.040502	0.132649	0.34342	0.00787577	8.64854	0.00454859	0.0198531	0.1298	0.0229333	0.000525938	0.780198	0.137442	0.148908	0.358962	0.192537	0.0110409	1.85775	0.00610901	0.0615353	0.336861	0.0573445
35	4	1	0	0.0116679	0.0136001	0.0361836	0.437944	0.00306381	36.4342	0.00178319	0.00841529	0.035871	0.00699591	4.89428e-05	0.922382	0.011501	0.0144547	0.0535291	0.533219	0.00467467	36.037	0.00276974	0.0096447	0.053161	0.00876688	7.68582e-05	0.864896	0.007867	0.00929634	0.0261714	0.46726	0.00231724	55.0839	0.00135471	0.0063019	0.026027	0.0049592	2.45936e-05	0.96727	0.00483651	0.0055056	0.014769	0.657662	0.00173218	141.538	0.000981868	0.00386888	0.0144558	0.00263384
35	1	1	0	0.0318087	0.0357078	0.0949185	0.7055	0.0114607	24.6019	0.0064923	0.0223327	0.0939073	0.0162448	0.000263895	0.990226	0.0357403	0.0426736	0.140808	0.636506	0.0148592	15.6196	0.00851251	0.028803	0.139837	0.023345	0.000544989	0.955542	0.0372061	0.0414546	0.0988387	0.623279	0.0114079	19.2876	0.0064614	0.0267034	0.0979657	0.0183031	0.000335002	0.946383	0.0190486	0.022651	0.0595992	0.493278	0.00605309	22.9586	0.00345714	0.0162699	0.0591427	0.0122712
35	2	1	0	0.39668	0.420111	0.704688	0.197721	0.0273757	0.794032	0.0152217	0.254025	0.549607	0.138456	0.0191702	0.576143	0.117422	0.148864	0.674147	0.566574	0.0518851	3.52948	0.0295994	0.089608	0.667662	0.091577	0.00838634	0.875065	0.274529	0.284675	0.4871	0.242254	0.0182625	1.80832	0.0102767	0.116532	0.374315	0.0753858	0.00568302	0.709193	0.740042	0.763222	1.16392	0.150016	0.0280271	0.435285	0.0151934	0.272099	0.864075	0.186827
35	3	1	0	0.219696	0.248028	0.779549	0.568528	0.0655052	2.85761	0.0379359	0.13758	0.773748	0.115219	0.0132754	1.05314	0.448329	0.474884	1.07936	0.485585	0.0760991	1.76113	0.0432533	0.145509	1.01401	0.156716	0.02456	0.938873	0.0566646	0.0608568	0.124015	0.514303	0.0114258	13.4161	0.00662159	0.0302416	0.120469	0.0222161	0.000493554	1.05664	0.13284	0.139168	0.307011	0.29548	0.0122703	3.95939	0.0068278	0.0584235	0.262006	0.0415266
35	4	1	0	0.01053	0.0149048	0.0576864	0.222251	0.0023466	12.2791	0.00136887	0.00827702	0.0576034	0.0105584	0.000111479	0.518693	0.00836171	0.0123441	0.0695647	0.336523	0.0030587	21.6518	0.0017887	0.00752734	0.0694951	0.00908912	8.26122e-05	0.702632	0.0131362	0.0183484	0.0713741	0.159043	0.00203928	7.04927	0.00115896	0.012065	0.0706104	0.0128222	0.000164408	0.454776	0.00405463	0.00577495	0.0233974	0.279024	0.00114846	37.8517	0.000641259	0.00339055	0.0233101	0.00411599
36	1	1	0	0.141505	0.165859	0.583022	0.643476	0.0557628	4.07492	0.0306015	0.103708	0.571665	0.0866586	0.00750971	0.840576	0.166405	0.191546	0.64109	0.728852	0.0692522	4.33762	0.0391598	0.113057	0.609866	0.0950155	0.00902794	0.857955	0.121336	0.147065	0.439321	0.615717	0.051249	4.05581	0.0280987	0.0939433	0.435004	0.0832347	0.00692802	0.791548	0.0847473	0.0989167	0.225148	0.71865	0.0367199	7.89646	0.0206159	0.0749937	0.221329	0.0510958
36	2	1	0	0.332398	0.342766	0.657724	0.231752	0.0194091	1.50935	0.0105865	0.097026	0.451272	0.0837495	0.00701398	0.573519	0.0835764	0.123876	0.529082	0.355768	0.0325619	2.15191	0.0180264	0.0576398	0.525862	0.0915256	0.00837694	0.625721	0.0985205	0.11748	0.350587	0.347743	0.0222756	2.98717	0.0122575	0.074382	0.346734	0.0640577	0.00410339	0.655683	0.24684	0.278535	0.590483	0.160764	0.0207657	0.654524	0.0109204	0.194237	0.590174	0.129169
36	3	1	0	0.430088	0.474885	1.17544	0.361057	0.0727594	0.958578	0.0389272	0.266794	1.13983	0.201518	0.0406093	0.716732	0.688394	0.749057	1.62305	0.29069	0.0859126	0.524615	0.045824	0.390451	1.41654	0.295547	0.087348	0.674659	0.330642	0.358834	0.892522	0.269858	0.037655	1.02981	0.0200508	0.173631	0.806	0.139536	0.0194704	0.651338	0.18108	0.19621	0.496967	0.257219	0.0194509	1.81508	0.0103793	0.0788599	0.486989	0.0756199
36	4	1	0	0.016921	0.0187651	0.045385	0.79874	0.00649081	54.8914	0.00362486	0.0111133	0.0445971	0.00812631	6.60369e-05	0.881306	0.0160548	0.0183358	0.0518385	0.851561	0.00755538	54.9878	0.0043286	0.0111146	0.0506654	0.00887239	7.87194e-05	0.856857	0.0138066	0.0156058	0.0351674	0.773863	0.00563916	60.0858	0.0031906	0.0105993	0.0347906	0.00728703	5.31008e-05	0.814095	0.00716908	0.00804192	0.0206958	0.76683	0.00279899	118.634	0.00158056	0.00541113	0.0202362	0.00365007
36	1	1	0	0.0754628	0.0909452	0.242733	0.550503	0.0279891	6.01423	0.0155467	0.062435	0.23929	0.0508427	0.00258498	0.755119	0.0769003	0.0976055	0.346796	0.602494	0.0362761	5.64567	0.0204669	0.0476924	0.343178	0.0602099	0.00362524	0.778882	0.0688146	0.083445	0.221447	0.553775	0.0261804	6.38774	0.0142768	0.0648492	0.219796	0.0472762	0.00223504	0.679869	0.0689502	0.0849342	0.272834	0.656383	0.0326077	7.33313	0.0180973	0.0603514	0.270336	0.0496778
36	2	1	0	0.321671	0.340321	0.854375	0.196397	0.0218417	0.966057	0.0119483	0.115271	0.681844	0.111212	0.0123681	0.524976	0.0694412	0.0959543	0.553157	0.462451	0.0306516	4.00554	0.0175968	0.0531986	0.551666	0.0662806	0.00439312	0.746001	0.0959583	0.111622	0.372783	0.38102	0.0217461	3.63201	0.0118308	0.0630112	0.370417	0.0570733	0.00325736	0.762107	0.327973	0.365643	0.824244	0.160785	0.0260133	0.529148	0.0138508	0.244782	0.814401	0.161789
36	3	1	0	0.280127	0.314435	0.984052	0.32313	0.0462054	1.1991	0.0245181	0.162182	0.957051	0.142993	0.020447	0.680536	0.408283	0.429417	1.08851	0.3919	0.0522066	1.57447	0.0279406	0.150207	0.945811	0.133214	0.017746	0.692648	0.220826	0.231486	0.430483	0.318564	0.022146	2.42155	0.0117028	0.104695	0.338965	0.0695182	0.00483279	0.670346	0.0847085	0.0956315	0.297629	0.251048	0.0111555	3.09096	0.00610319	0.0406499	0.283182	0.0444357
36	4	1	0	0.0162651	0.0181431	0.0383085	0.909403	0.00732185	64.7175	0.00419518	0.0113858	0.0377267	0.00805127	6.4823e-05	0.84322	0.0128249	0.0144757	0.0354228	0.790224	0.00531339	69.5539	0.0031446	0.0085711	0.0345882	0.00672391	4.52109e-05	0.948257	0.0173774	0.0201976	0.0517889	0.728049	0.00750647	40.4411	0.00429905	0.0120781	0.0505477	0.0103104	0.000106304	0.795994	0.00709291	0.00808742	0.0173914	0.711539	0.00276906	100.913	0.00152832	0.00554103	0.016937	0.00389164
36	1	1	0	0.0681769	0.0846821	0.377922	0.538787	0.0271051	5.93359	0.015017	0.0508882	0.374477	0.0503076	0.00253085	0.773277	0.08992	0.110809	0.449312	0.59781	0.0387704	5.26679	0.0221524	0.0569353	0.443402	0.0648541	0.00420605	0.836991	0.0620169	0.0727453	0.270091	0.572325	0.0217958	8.32376	0.0120721	0.0300241	0.268503	0.038083	0.00145031	0.765336	0.0616813	0.0757676	0.322526	0.500001	0.0220352	6.33225	0.0122985	0.048398	0.31958	0.0440703
36	2	1	0	0.325317	0.344966	0.702287	0.211404	0.0242918	0.999906	0.0132023	0.102333	0.515195	0.114907	0.0132036	0.5042	0.0727375	0.108849	0.406655	0.390898	0.0316946	2.69677	0.0177291	0.0639694	0.404882	0.0810815	0.00657421	0.582155	0.0775782	0.100065	0.351325	0.412581	0.0261101	3.64167	0.0145847	0.0514554	0.350759	0.0632847	0.00400495	0.627245	0.269043	0.30797	0.717348	0.177808	0.0266822	0.636899	0.0143421	0.195828	0.704443	0.150062
36	3	1	0	0.42887	0.519765	1.3735	0.177212	0.0520856	0.321463	0.0277701	0.433019	1.33205	0.293916	0.0863867	0.493056	0.560626	0.674707	1.90032	0.169249	0.0635957	0.241114	0.0340426	0.523611	1.81923	0.375751	0.141189	0.462985	0.303046	0.352951	0.885092	0.145655	0.0263785	0.416081	0.0136467	0.261465	0.827613	0.181103	0.0327982	0.404423	0.164357	0.197485	0.581464	0.166996	0.0183005	0.790356	0.00949149	0.121453	0.550282	0.109586
36	4	1	0	0.0235216	0.0281853	0.073465	0.473563	0.00736534	17.3949	0.00420776	0.0206431	0.0721778	0.015553	0.000241896	0.832524	0.016397	0.0188854	0.0445519	0.730467	0.0068552	45.286	0.00398844	0.0129977	0.0441593	0.00938468	8.80722e-05	0.904027	0.0157526	0.0186099	0.0489841	0.715068	0.0070965	41.4127	0.00407875	0.0136403	0.0488094	0.00992423	9.84904e-05	0.832697	0.00863553	0.00970274	0.0232581	0.750032	0.00332324	95.788	0.00188051	0.00658726	0.0227032	0.0044308
36	1	1	0	0.0675663	0.0899383	0.445182	0.440541	0.0261781	4.13852	0.0146133	0.0524003	0.443594	0.0594226	0.00353105	0.786168	0.0874054	0.109689	0.481642	0.519825	0.034486	4.46226	0.0196393	0.0558492	0.480068	0.0663416	0.00440121	0.814959	0.0435451	0.0500166	0.134428	0.698038	0.0171942	15.6994	0.00952552	0.0289	0.133639	0.0246322	0.000606745	0.904555	0.0449953	0.0644125	0.319098	0.451726	0.0208423	5.46365	0.0116311	0.0341018	0.317522	0.0461391
36	2	1	0	0.315303	0.33495	0.726081	0.210911	0.0238646	1.01176	0.0129536	0.145952	0.56931	0.11315	0.012803	0.556151	0.0756123	0.0998249	0.425814	0.488632	0.0318808	4.20298	0.0178917	0.0639054	0.424486	0.065245	0.00425691	0.795732	0.105884	0.118844	0.321798	0.471624	0.0254795	4.80472	0.0140235	0.056668	0.313008	0.054025	0.0029187	0.743635	0.42711	0.466532	0.977132	0.150869	0.0283478	0.429844	0.0151757	0.318006	0.878491	0.187897
36	3	1	0	0.647968	0.701783	1.64063	0.31314	0.084482	0.614358	0.044717	0.31683	1.49389	0.26979	0.0727867	0.634986	0.816041	0.876439	1.75992	0.308792	0.0988299	0.512622	0.0525099	0.41345	1.49014	0.320053	0.102434	0.625005	0.471602	0.507336	1.19841	0.237399	0.0444474	0.660739	0.0231614	0.253749	0.976731	0.187226	0.0350538	0.552256	0.224524	0.250486	0.499105	0.22664	0.0251943	1.0621	0.0131249	0.159191	0.491743	0.111164
36	4	1	0	0.0141861	0.0166034	0.0514331	0.668914	0.00577835	44.4454	0.0033166	0.00989779	0.0507474	0.0086384	7.4622e-05	0.878486	0.0138531	0.0161806	0.0567553	0.711383	0.00595549	48.8328	0.00342248	0.0108284	0.0559912	0.00837171	7.00855e-05	0.891456	0.0177271	0.0210716	0.0584504	0.655849	0.00748081	33.3847	0.00434347	0.0127286	0.057866	0.0114063	0.000130104	0.845808	0.00956403	0.0110665	0.029353	0.583297	0.0032518	58.3687	0.00181405	0.00632581	0.0289165	0.00557487
36	1	1	0	0.0828045	0.106213	0.422568	0.466935	0.0310995	3.88182	0.0172199	0.0545493	0.418316	0.0666036	0.00443604	0.721803	0.105453	0.12917	0.462156	0.599528	0.0447807	4.504	0.0251282	0.0622502	0.4544	0.0746933	0.00557908	0.796528	0.0574659	0.0692568	0.267139	0.529955	0.0205117	7.42363	0.011121	0.0399825	0.263432	0.0387046	0.00149805	0.760184	0.0543779	0.069009	0.284547	0.558778	0.0237725	7.40261	0.0133985	0.0433821	0.281836	0.0425438
36	2	1	0	0.297027	0.309959	0.555354	0.262343	0.0232655	1.61366	0.012691	0.0836308	0.457079	0.0886833	0.00786473	0.602117	0.0852908	0.111276	0.392962	0.498418	0.0356563	3.93748	0.0201514	0.0839625	0.392316	0.071539	0.00511783	0.759183	0.106373	0.120108	0.32241	0.450342	0.0251414	4.54192	0.0141558	0.082003	0.319292	0.0558274	0.0031167	0.801723	0.375157	0.411003	0.712557	0.145287	0.024413	0.459465	0.012973	0.271065	0.707877	0.168033
36	3	1	0	0.464869	0.528361	1.55077	0.273596	0.0687833	0.576171	0.0364164	0.285041	1.49462	0.251404	0.0632042	0.590345	0.691521	0.747424	1.90894	0.290853	0.0825853	0.545058	0.0439443	0.352662	1.68703	0.283942	0.0806231	0.601308	0.401502	0.432601	1.11539	0.212796	0.034311	0.691802	0.0179855	0.160811	0.914869	0.161239	0.025998	0.520998	0.189979	0.212069	0.581579	0.211885	0.0199908	1.18044	0.0105076	0.103453	0.566739	0.0943473
36	4	1	0	0.0272228	0.0326943	0.0992706	0.40664	0.0073726	12.9084	0.00424318	0.0246367	0.0976387	0.0181305	0.000328716	0.825601	0.0190165	0.0247798	0.0838846	0.354782	0.00564407	12.7544	0.00322791	0.0125545	0.0824733	0.0159085	0.000253081	0.759124	0.0174787	0.0199122	0.0508453	0.637178	0.00608598	38.3619	0.00349977	0.0132514	0.0502317	0.00955146	9.12304e-05	0.943391	0.00902107	0.0107821	0.0379094	0.610749	0.00361152	57.8998	0.00202457	0.00797046	0.0375063	0.00591327
37	1	1	0	0.100432	0.119445	0.354964	0.618293	0.0400295	5.3304	0.0223425	0.0797413	0.351106	0.064742	0.00419153	0.903893	0.0938562	0.108942	0.332996	0.67959	0.0376382	6.70237	0.0205585	0.0689276	0.326108	0.0553836	0.00306735	0.830327	0.101112	0.120462	0.348685	0.672694	0.0441046	5.71717	0.0245762	0.0765423	0.344304	0.0655641	0.00429866	0.8052	0.114547	0.135768	0.391423	0.597101	0.0435744	4.47245	0.0238184	0.0849725	0.388341	0.0729766
37	2	1	0	0.403297	0.441109	0.844353	0.39784	0.0712178	1.22835	0.0393626	0.280575	0.771273	0.179011	0.032045	0.780223	0.273169	0.312024	0.705643	0.717355	0.108367	2.7492	0.0627379	0.224498	0.688758	0.151064	0.0228205	0.820672	0.484244	0.531213	1.06737	0.257342	0.0563041	0.64062	0.0306662	0.376729	0.920537	0.218791	0.0478696	0.584913	0.53149	0.567992	0.922223	0.349149	0.0700733	0.959957	0.0386666	0.365955	0.76358	0.200698
37	3	1	0	0.651442	0.725558	2.44494	0.703008	0.22485	1.22119	0.124924	0.334656	2.39137	0.319839	0.102297	0.858028	1.07265	1.15051	2.8815	0.614158	0.255806	0.824941	0.143115	0.552222	2.6879	0.416515	0.173485	0.95614	0.142059	0.162335	0.442744	0.690579	0.0543168	4.87341	0.0301491	0.111474	0.440797	0.0786539	0.00618644	0.923287	0.173517	0.204917	0.586409	0.671154	0.073247	3.41979	0.0407318	0.120578	0.581696	0.109136
37	4	1	0	0.0498849	0.067281	0.230172	0.469385	0.0212194	6.02641	0.0123159	0.0493261	0.227717	0.0452068	0.00204366	0.573607	0.0556941	0.0668114	0.173762	0.531846	0.0196535	7.83646	0.0107011	0.0452887	0.171624	0.0369534	0.00136555	0.730013	0.0945997	0.139341	0.37095	0.157107	0.0160946	0.825087	0.00865904	0.167976	0.370569	0.102444	0.0104947	0.349462	0.0486169	0.0645323	0.172897	0.209987	0.00892286	2.66063	0.00480405	0.0656995	0.172499	0.0424925
37	1	1	0	0.0941356	0.114613	0.353441	0.55609	0.0364079	4.69607	0.0201296	0.0627378	0.345316	0.0654712	0.00428648	0.808857	0.0748317	0.087759	0.293292	0.666902	0.0306175	8.32826	0.0175538	0.0536088	0.290149	0.0459101	0.00210773	0.89253	0.097344	0.112467	0.329627	0.627254	0.0353816	6.20772	0.0197515	0.0767728	0.325418	0.0564071	0.00318176	0.889	0.109207	0.128173	0.355842	0.577726	0.038819	4.72634	0.0213387	0.0925838	0.352663	0.0671927
37	2	1	0	0.363702	0.379845	0.700439	0.586746	0.0643406	3.05577	0.0367443	0.14437	0.674007	0.109657	0.0120246	0.998468	0.215404	0.259053	0.724925	0.709032	0.102128	2.7498	0.0570508	0.203336	0.713099	0.144039	0.0207472	0.916509	0.417582	0.456976	0.979526	0.332528	0.0617774	0.970607	0.0335002	0.227374	0.963463	0.185781	0.0345147	0.728666	0.369926	0.398271	0.750946	0.434015	0.0641021	1.62357	0.0354164	0.180998	0.741818	0.147696
37	3	1	0	0.628974	0.72037	2.06254	0.727362	0.25571	1.17762	0.145546	0.423962	1.98588	0.351558	0.123593	0.963005	0.993955	1.10151	2.70026	0.703352	0.334269	0.839547	0.189623	0.630362	2.65184	0.475251	0.225864	0.891024	0.193492	0.224317	0.643847	0.674412	0.0766197	3.34273	0.043145	0.14347	0.635744	0.11361	0.0129071	0.895268	0.22948	0.268059	0.615675	0.599513	0.0831499	2.39588	0.0460883	0.207723	0.608753	0.138696
37	4	1	0	0.109933	0.121656	0.258165	1.06408	0.0555245	11.4536	0.0311861	0.0810829	0.256008	0.0521807	0.00272282	0.785042	0.118555	0.12752	0.247141	0.968844	0.0455722	11.3103	0.0250245	0.0691383	0.239469	0.0470377	0.00221254	0.697737	0.272892	0.277756	0.405165	0.615168	0.0318817	6.21715	0.0166989	0.0786867	0.287661	0.051826	0.00268593	0.761421	0.166868	0.171011	0.287369	0.729487	0.0273322	10.2054	0.0143266	0.0566509	0.200154	0.0374677
37	1	1	0	0.082203	0.096561	0.280389	0.701057	0.0355616	7.75847	0.0199633	0.0510121	0.275789	0.0507257	0.0025731	0.909228	0.0750228	0.0867005	0.271247	0.726657	0.0316181	9.17068	0.0173626	0.0557001	0.267314	0.0435117	0.00189327	0.929427	0.0868898	0.100395	0.279712	0.632096	0.0318294	6.97239	0.0176796	0.0604648	0.273	0.0503553	0.00253566	0.875495	0.109024	0.127803	0.356579	0.62975	0.0420502	5.14419	0.0229359	0.0835042	0.352225	0.0667729
37	2	1	0	0.351184	0.376332	0.7329	0.471563	0.0638416	1.91029	0.0350128	0.190654	0.653667	0.135383	0.0183286	0.93108	0.241541	0.279176	0.920574	0.750174	0.105112	3.01905	0.0592719	0.15689	0.917128	0.140117	0.0196326	0.968554	0.485621	0.512477	0.93035	0.293642	0.0481196	0.970567	0.0260636	0.267029	0.758189	0.163872	0.026854	0.723832	0.443181	0.465747	0.942156	0.465018	0.0666586	1.74947	0.0359485	0.199822	0.862367	0.143346
37	3	1	0	0.688278	0.767745	1.69581	0.752573	0.256353	1.25093	0.145149	0.36562	1.64907	0.340635	0.116032	0.895561	1.33182	1.41602	2.60739	0.791968	0.38148	0.937343	0.217484	0.625363	2.50211	0.481686	0.232022	0.892259	0.20751	0.232844	0.45258	0.788241	0.0833726	4.14924	0.0464191	0.165761	0.448988	0.10577	0.0111874	0.910052	0.277776	0.325106	0.83828	0.68143	0.115271	2.24157	0.0641426	0.234193	0.824752	0.16916
37	4	1	0	0.0789937	0.0976478	0.271475	0.685056	0.0393865	6.83374	0.0225892	0.0745954	0.266523	0.0574939	0.00330555	0.725064	0.0890744	0.103265	0.229265	0.653396	0.0341897	6.64511	0.0181945	0.0727334	0.224518	0.0523262	0.00273803	0.733132	0.162762	0.200117	0.442957	0.223784	0.0260957	1.0067	0.0136892	0.208358	0.439538	0.116611	0.0135982	0.518005	0.114344	0.143437	0.337988	0.276138	0.0239518	1.69696	0.0127671	0.144915	0.334547	0.0867382
37	1	1	0	0.0888956	0.115569	0.450593	0.549717	0.0406536	4.31128	0.0235791	0.0569985	0.447125	0.0739537	0.00546915	0.825811	0.0781534	0.0926493	0.352863	0.665617	0.0331669	7.38367	0.018333	0.0524756	0.350636	0.0498288	0.00248291	0.880275	0.0978968	0.113747	0.302534	0.594689	0.0344919	5.62092	0.0189086	0.076345	0.295053	0.0579998	0.00336398	0.831417	0.114229	0.13772	0.376613	0.542909	0.0418256	3.86122	0.0229169	0.0895397	0.373427	0.0770399
37	2	1	0	0.37422	0.408061	0.970332	0.519367	0.0845811	1.74058	0.0461627	0.212517	0.946809	0.162854	0.0265215	0.909342	0.263191	0.311404	0.907138	0.734451	0.122355	2.54147	0.0705344	0.213002	0.901677	0.166594	0.0277534	1.03669	0.547843	0.59219	1.29782	0.317417	0.071435	0.764259	0.0387083	0.324265	1.25731	0.225051	0.0506481	0.722246	0.485803	0.518318	1.08259	0.556923	0.100721	1.67195	0.0546859	0.235463	1.05027	0.180853
37	3	1	0	0.53797	0.617663	2.01346	0.777122	0.23605	1.47031	0.135656	0.380963	2.00543	0.303749	0.0922634	1.0286	0.996599	1.07544	2.70267	0.857811	0.347024	1.19681	0.195868	0.545143	2.58456	0.404546	0.163658	1.04796	0.199736	0.224368	0.508169	0.840036	0.0859366	4.63422	0.0484995	0.140528	0.505059	0.102301	0.0104655	0.940788	0.230708	0.264809	0.750306	0.618469	0.0804682	2.62014	0.0443544	0.166335	0.732889	0.130109
37	4	1	0	0.124782	0.136048	0.321045	1.09226	0.059309	11.5282	0.0339901	0.0808589	0.314579	0.0542995	0.00294844	0.807949	0.132905	0.141792	0.299451	0.916449	0.0453577	9.96883	0.0244191	0.0748996	0.269885	0.0494929	0.00244955	0.763501	0.294166	0.298653	0.481357	0.78043	0.0403162	8.02397	0.0214132	0.0751231	0.2896	0.051659	0.00266865	0.700754	0.179021	0.18415	0.321481	0.636194	0.0275014	7.7574	0.0144959	0.0651448	0.232801	0.043228
37	1	1	0	0.0743906	0.0978324	0.48914	0.466926	0.029701	4.06492	0.0164474	0.0497963	0.483646	0.0636097	0.00404619	0.811849	0.0946173	0.11388	0.439604	0.641365	0.0406905	5.64993	0.0227415	0.0638506	0.437984	0.0634436	0.00402509	0.918164	0.0666375	0.0814598	0.325465	0.564343	0.0264701	6.56431	0.0144415	0.0477085	0.320815	0.0469043	0.00220001	0.78649	0.0964575	0.118558	0.504606	0.509691	0.035174	4.01819	0.0191364	0.0700101	0.499905	0.0690105
37	2	1	0	0.317924	0.340824	0.655982	0.541338	0.0665479	2.48874	0.0376106	0.168813	0.629664	0.122932	0.0151123	1.00489	0.232996	0.277716	0.734418	0.592092	0.0895595	2.117	0.0484357	0.204213	0.724488	0.151259	0.0228794	0.847381	0.49189	0.520418	0.940445	0.31341	0.0533076	1.00211	0.0289911	0.277853	0.802126	0.170089	0.0289301	0.751768	0.396343	0.422074	0.770211	0.461979	0.0670985	1.73959	0.0366967	0.21034	0.724282	0.145242
37	3	1	0	0.661035	0.73626	1.85726	0.76542	0.248426	1.36221	0.143496	0.418718	1.80617	0.324562	0.10534	1.01368	1.25884	1.34471	3.04323	0.726812	0.344026	0.87644	0.196363	0.626221	2.8525	0.473336	0.224047	1.01768	0.18741	0.218048	0.556248	0.656149	0.0732118	3.31885	0.0413186	0.117359	0.553082	0.111578	0.0124497	0.814988	0.270514	0.327566	1.1593	0.539982	0.0998542	1.59321	0.0544815	0.202632	1.15525	0.184921
37	4	1	0	0.113195	0.131199	0.276974	0.861626	0.0572425	7.36331	0.0324992	0.0985086	0.275357	0.0664354	0.00441367	0.851773	0.0890541	0.103879	0.233301	0.770374	0.0412654	7.96858	0.0228639	0.0816941	0.230279	0.0535654	0.00286925	0.71586	0.265387	0.289124	0.492485	0.364839	0.0419218	1.67812	0.0221564	0.202366	0.454375	0.114905	0.0132031	0.565469	0.155064	0.169369	0.313925	0.439976	0.0300194	3.4289	0.0159625	0.106095	0.303954	0.0682298
38	1	1	0	0.199013	0.226322	0.625512	0.682393	0.0736435	3.50356	0.0408046	0.124116	0.594509	0.107919	0.0116466	0.86808	0.218926	0.263809	0.643434	0.705346	0.103964	2.66308	0.0578557	0.230522	0.637223	0.147394	0.0217251	0.862749	0.166228	0.216242	0.693599	0.491451	0.0680624	1.94785	0.0373603	0.189775	0.689767	0.138493	0.0191803	0.763595	0.124818	0.149734	0.423359	0.689099	0.0570714	4.71704	0.0323552	0.0937789	0.421527	0.0828204
38	2	1	0	0.585171	0.615892	1.22897	0.743221	0.142913	2.23874	0.0827768	0.227349	1.18003	0.192288	0.0369746	0.90193	0.383039	0.456869	1.4473	0.676827	0.16872	1.5899	0.0987974	0.311499	1.43757	0.24928	0.0621406	1.03518	0.431838	0.454867	0.741232	0.553249	0.0791412	2.20751	0.0451716	0.204114	0.719461	0.143048	0.0204627	0.985965	1.13604	1.16001	1.85231	0.697366	0.163799	1.70681	0.0941642	0.283966	1.39857	0.234882
38	3	1	0	1.07459	1.14188	2.50415	0.792842	0.306562	1.18619	0.177343	0.449587	2.39197	0.386662	0.149507	0.93541	1.89655	1.96118	3.84176	0.824585	0.412262	0.94195	0.235453	0.675908	3.16292	0.499963	0.249963	1.04208	0.414221	0.462794	0.979281	0.428068	0.08846	1.1596	0.0495195	0.322579	0.947646	0.206649	0.042704	0.884269	0.335211	0.385433	0.912841	0.683799	0.130248	2.07422	0.0752553	0.286156	0.905343	0.190476
38	4	1	0	0.0252505	0.0324406	0.101283	0.398965	0.00813449	11.3732	0.00472797	0.0220112	0.100549	0.020389	0.000415712	0.827345	0.0310156	0.0404198	0.199724	0.562594	0.0145979	12.6287	0.00850245	0.0245312	0.198282	0.0259474	0.000673267	0.851821	0.0132095	0.0160518	0.0633004	0.6323	0.00577276	39.4515	0.0032884	0.01064	0.0623205	0.00912978	8.33529e-05	0.935307	0.020202	0.0234045	0.0689776	0.701531	0.00829926	33.7055	0.00471722	0.0144069	0.0668919	0.0118302
38	1	1	0	0.228678	0.262904	0.813677	0.662173	0.0859882	2.78591	0.0469789	0.14082	0.80406	0.129858	0.016863	0.911732	0.260808	0.308611	0.80597	0.755249	0.124747	2.51295	0.0685594	0.221194	0.790104	0.165174	0.0272824	0.857468	0.244095	0.28526	0.740411	0.586565	0.0866865	2.22289	0.0485499	0.185965	0.728458	0.147787	0.0218409	0.907881	0.22368	0.257151	0.709052	0.734162	0.0932436	3.23034	0.0521078	0.169889	0.699103	0.127007
38	2	1	0	0.708164	0.734014	1.23053	0.713708	0.137973	2.08879	0.0780621	0.263686	1.12713	0.193318	0.0373719	0.952935	0.296885	0.341469	0.811229	0.779185	0.131613	2.7008	0.0770563	0.240153	0.797699	0.168911	0.0285309	1.007	0.394294	0.418199	0.727509	0.56564	0.0789274	2.28837	0.0445556	0.186344	0.675489	0.139536	0.0194704	1.01862	1.36173	1.38454	2.09061	0.693002	0.17366	1.57061	0.0986279	0.354361	1.48815	0.250591
38	3	1	0	1.09854	1.17593	2.52631	0.769648	0.32326	1.03289	0.18221	0.520586	2.45247	0.42001	0.176408	0.991668	1.8399	1.92132	3.72436	0.738731	0.409259	0.753093	0.231138	0.667042	3.26317	0.554002	0.306919	1.03895	0.455622	0.503078	1.15148	0.420793	0.0898521	1.09825	0.0500751	0.293489	1.12477	0.21353	0.0455952	0.87596	0.459356	0.515086	1.12765	0.63971	0.149237	1.56106	0.0849582	0.36172	1.10418	0.233289
38	4	1	0	0.0411323	0.0539702	0.176629	0.290599	0.0101667	4.91524	0.0060161	0.0339597	0.175534	0.0349852	0.00122397	0.7159	0.0333428	0.039502	0.126711	0.692093	0.0146781	18.7747	0.00844467	0.0247205	0.125391	0.0212083	0.00044979	0.895045	0.0145031	0.016531	0.0405246	0.843626	0.00670091	59.9488	0.00378223	0.00990372	0.0399153	0.00794298	6.3091e-05	0.953428	0.0192854	0.0219544	0.0588965	0.716992	0.00753157	37.8885	0.0041807	0.0140325	0.0583076	0.0105044
38	1	1	0	0.268408	0.314513	0.967784	0.586532	0.0962456	1.9635	0.0528701	0.169174	0.947223	0.164093	0.0269264	0.9459	0.291329	0.342555	0.887877	0.736286	0.132804	2.26734	0.0737645	0.260567	0.882707	0.18037	0.0325334	0.934879	0.280314	0.326459	0.907215	0.589403	0.0987197	1.93599	0.0543107	0.221722	0.884659	0.167491	0.0280533	0.926918	0.25793	0.297391	0.892156	0.735493	0.108981	2.85285	0.0626358	0.192417	0.888194	0.148174
38	2	1	0	0.831938	0.851128	1.52653	0.858617	0.15455	2.7169	0.0880262	0.199215	1.28811	0.179999	0.0323995	0.745048	0.226958	0.269373	0.864004	0.674465	0.0980134	2.68819	0.0567692	0.183051	0.854325	0.14532	0.021118	0.891295	0.335191	0.361888	0.853501	0.516904	0.0706248	2.08842	0.0389864	0.169924	0.798308	0.13663	0.0186679	0.844659	1.47737	1.50272	2.46088	0.673446	0.185406	1.36907	0.103769	0.356099	1.66695	0.275309
38	3	1	0	1.05494	1.14148	2.57479	0.845168	0.368866	1.08745	0.207138	0.497883	2.50269	0.436441	0.190481	0.959526	1.84622	1.91974	3.80052	0.907836	0.478175	0.999695	0.277349	0.645933	3.45017	0.526719	0.277433	1.00654	0.418534	0.474771	1.08553	0.453003	0.101642	1.10134	0.0554458	0.305262	1.05821	0.224374	0.0503439	0.87712	0.491347	0.543598	1.32218	0.704903	0.164095	1.75562	0.0951397	0.294362	1.31406	0.232791
38	4	1	0	0.0377353	0.0445151	0.133929	0.424203	0.0100315	10.4639	0.00585163	0.0230843	0.13206	0.0236478	0.000559219	0.844366	0.0335294	0.0407045	0.133014	0.650736	0.0150394	16.1739	0.00863904	0.0261949	0.131539	0.0231113	0.000534134	0.880287	0.013434	0.0149328	0.0348032	0.815026	0.00532187	71.319	0.00304082	0.00907066	0.0334267	0.0065297	4.26369e-05	0.882337	0.0200383	0.0231615	0.0588735	0.758157	0.00881889	37.3532	0.00505404	0.0159471	0.0583831	0.011632
38	1	1	0	0.293197	0.346576	0.998434	0.589656	0.109125	1.78449	0.0611179	0.191172	0.98967	0.185066	0.0342494	0.839532	0.300496	0.356621	1.01414	0.732604	0.140895	2.11609	0.0782689	0.229956	0.99533	0.192321	0.0369875	0.871356	0.300659	0.338841	0.862719	0.638099	0.0998547	2.21536	0.0542506	0.193352	0.836046	0.156488	0.0244884	0.815658	0.266275	0.314773	0.864944	0.683729	0.114941	2.30988	0.0652791	0.236561	0.845694	0.16811
38	2	1	0	0.813806	0.836319	1.52059	0.703712	0.135797	2.04279	0.0760702	0.244095	1.27131	0.192973	0.0372384	0.957879	0.298788	0.345379	0.886819	0.742636	0.128808	2.44053	0.0734201	0.249239	0.880103	0.173446	0.0300837	0.95264	0.387402	0.416357	0.761169	0.597331	0.0912348	2.19756	0.0512663	0.217107	0.718546	0.152737	0.0233287	0.904124	1.56568	1.58696	2.38942	0.622516	0.161416	1.34532	0.0904513	0.33966	1.40264	0.259296
38	3	1	0	1.09303	1.17566	2.7458	0.768512	0.333109	1.00133	0.188127	0.539413	2.59619	0.433447	0.187876	0.958743	1.95565	2.04052	4.15656	0.838277	0.488723	0.814566	0.27687	0.695352	3.81391	0.583009	0.339899	1.02298	0.452932	0.480978	0.950798	0.669038	0.108396	2.27628	0.0597518	0.214286	0.79779	0.162018	0.0262497	0.901707	0.582029	0.634844	1.45634	0.737645	0.187209	1.6959	0.109234	0.371057	1.3828	0.253792
38	4	1	0	0.0396681	0.0476102	0.136975	0.507043	0.0133694	11.3917	0.00792003	0.0315738	0.13511	0.0263675	0.000695243	0.890097	0.0423396	0.0482048	0.114601	0.786007	0.0181402	19.0551	0.0101495	0.0328464	0.113472	0.023079	0.000532639	0.847549	0.0201441	0.0233391	0.0649446	0.788776	0.00931097	38.2423	0.00532875	0.0149415	0.0633871	0.0118043	0.000139342	0.927468	0.0222733	0.0254827	0.0792546	0.758145	0.00939991	35.2126	0.00541304	0.0154936	0.0783986	0.0123986
38	1	1	0	0.333119	0.386831	1.25846	0.587463	0.115635	1.61014	0.062385	0.224848	1.22754	0.196838	0.0387451	0.862142	0.340383	0.394769	0.887512	0.774032	0.154922	2.08335	0.0834584	0.296535	0.878652	0.200149	0.0400597	0.871566	0.274523	0.317711	0.829823	0.625776	0.100177	2.1734	0.0556973	0.19344	0.80934	0.160084	0.0256268	0.926785	0.35898	0.419736	1.37935	0.628552	0.13685	1.6036	0.076016	0.248987	1.36221	0.217723
38	2	1	0	0.85926	0.887526	1.7486	0.751253	0.167143	1.90375	0.0942355	0.270534	1.54533	0.222486	0.0494999	0.888748	0.358298	0.433473	1.37156	0.609548	0.148899	1.406	0.0838987	0.290915	1.36134	0.244278	0.0596718	0.865886	0.341439	0.378863	0.820284	0.506097	0.0831981	1.69279	0.045747	0.235017	0.786722	0.164392	0.0270246	0.899131	1.60071	1.62999	2.60331	0.666435	0.205211	1.20985	0.114714	0.388295	1.89722	0.307924
38	3	1	0	1.139	1.23954	2.6981	0.794247	0.388829	0.92854	0.222539	0.611796	2.66478	0.489557	0.239666	0.990594	1.98995	2.08682	3.9414	0.875227	0.550596	0.795877	0.314971	0.846171	3.80862	0.629089	0.395753	1.01017	0.500827	0.542193	1.13093	0.528748	0.109947	1.41771	0.061299	0.303075	1.06411	0.207938	0.043238	1.01015	0.556495	0.612012	1.4716	0.786396	0.200507	1.76213	0.114555	0.37637	1.45643	0.254969
38	4	1	0	0.0289347	0.0417412	0.15343	0.266971	0.0080397	5.09861	0.00462386	0.0257905	0.15281	0.0301145	0.000906885	0.658616	0.0354935	0.0411557	0.120295	0.646701	0.0134857	17.4407	0.00758416	0.0278476	0.118607	0.0208531	0.000434853	0.94142	0.0151037	0.0169803	0.0431513	0.69049	0.00536301	49.8006	0.00300425	0.0103151	0.0420373	0.00776696	6.03256e-05	1.01602	0.023654	0.0281476	0.102949	0.599396	0.00915399	22.1559	0.00516752	0.0188177	0.102469	0.015272
39	1	1	0	0.114437	0.134308	0.419934	0.725205	0.0510666	5.81219	0.0288198	0.0861996	0.416849	0.0704167	0.00495851	0.868373	0.11631	0.138062	0.36107	0.579467	0.0431725	4.45673	0.0247385	0.100693	0.353573	0.0745038	0.00555082	0.798233	0.115657	0.137751	0.417722	0.60206	0.0451214	4.43962	0.0249363	0.109907	0.416183	0.0749451	0.00561677	0.791151	0.177669	0.20702	0.59218	0.626673	0.0666954	3.44496	0.0390206	0.148582	0.580766	0.106428
39	2	1	0	0.446522	0.476613	1.09822	0.411133	0.0686071	1.37388	0.038258	0.175126	1.08816	0.166873	0.0278467	0.717982	0.224564	0.289687	0.89424	0.485452	0.0889489	1.49578	0.0502177	0.250855	0.887093	0.183229	0.0335729	0.726008	0.132404	0.156761	0.531279	0.467502	0.0392835	3.13655	0.0221465	0.094442	0.528348	0.0840284	0.00706078	0.820899	0.398938	0.459278	1.20084	0.32762	0.0746465	0.791144	0.0410708	0.257853	1.14778	0.227845
39	3	1	0	0.654032	0.704016	1.56095	0.549825	0.143387	1.19373	0.0811857	0.315974	1.52053	0.260787	0.0680101	0.911583	0.585737	0.661983	1.72375	0.472169	0.145773	0.871423	0.083059	0.438914	1.68391	0.30873	0.0953142	0.862981	0.234487	0.281867	0.937141	0.375766	0.0588303	1.3461	0.0329948	0.224652	0.927317	0.156561	0.0245113	0.700934	0.11438	0.137028	0.369081	0.504196	0.0380822	3.76386	0.0214723	0.0882019	0.36423	0.0755305
39	4	1	0	0.0148679	0.018677	0.0670928	0.435688	0.00493056	22.5884	0.00289285	0.0120335	0.0668596	0.0113167	0.000128068	0.818684	0.0242686	0.0324112	0.100899	0.31546	0.00678479	8.47105	0.00391851	0.024612	0.100268	0.0215076	0.000462577	0.667506	0.0104197	0.0123295	0.0420397	0.619643	0.00408897	54.399	0.00236885	0.0074786	0.0418136	0.00659892	4.35457e-05	0.975407	0.011381	0.0135672	0.0376887	0.560047	0.00414078	42.4885	0.00232267	0.00881071	0.0371833	0.00739364
39	1	1	0	0.0787075	0.0907207	0.235497	0.73815	0.0333503	9.26694	0.0189168	0.059983	0.229873	0.045181	0.00204132	1.03228	0.0749624	0.0879323	0.268057	0.652167	0.0300203	8.33356	0.017658	0.0636378	0.266094	0.0460316	0.00211891	0.824822	0.0828904	0.0990813	0.241825	0.59017	0.032081	6.09465	0.018009	0.0690359	0.239083	0.0543589	0.00295489	0.8221	0.118748	0.13358	0.314318	0.893365	0.0547319	8.30463	0.0311705	0.0841594	0.311613	0.0612649
39	2	1	0	0.447201	0.466948	0.950134	0.483286	0.0649962	2.00178	0.0362063	0.101744	0.771124	0.134488	0.0180871	0.797853	0.257815	0.322746	1.07401	0.522577	0.101561	1.51269	0.0571353	0.216603	1.06754	0.194347	0.0377708	0.810173	0.137341	0.155088	0.368447	0.577219	0.0416234	4.48731	0.0233334	0.0885158	0.356381	0.0721102	0.00519988	0.801736	0.494082	0.528018	1.24783	0.384342	0.0716506	1.12607	0.0391355	0.222504	1.07511	0.186424
39	3	1	0	0.654734	0.697747	1.45151	0.521643	0.125941	1.19113	0.0694301	0.296295	1.42992	0.241431	0.058289	0.815767	0.601954	0.668403	1.60281	0.450724	0.131084	0.87986	0.07442	0.400208	1.58273	0.290829	0.0845816	0.845645	0.256511	0.296764	0.804156	0.346829	0.0518108	1.29846	0.028976	0.213859	0.78304	0.149384	0.0223156	0.705439	0.100989	0.117574	0.324827	0.627738	0.0378313	5.90902	0.0214616	0.0814612	0.32014	0.0602661
39	4	1	0	0.0241615	0.0329061	0.156575	0.312627	0.00699407	7.81697	0.00391242	0.0169004	0.155677	0.0223719	0.000500504	0.616635	0.0327281	0.0462381	0.189682	0.276767	0.00905315	4.78479	0.00511958	0.0343189	0.188382	0.0327104	0.00106997	0.574845	0.0143645	0.0178564	0.0697842	0.508132	0.00539776	27.2116	0.00307064	0.0107563	0.0691667	0.0106228	0.000112843	0.78229	0.0121499	0.013963	0.0390825	0.630698	0.00434611	50.1503	0.0023814	0.00919592	0.0388008	0.00689095
39	1	1	0	0.0990071	0.114954	0.327051	0.71051	0.041555	7.08802	0.0242455	0.0682174	0.324904	0.0584862	0.00342063	0.933495	0.088532	0.101829	0.287263	0.710802	0.0358061	8.06287	0.02046	0.0715441	0.282439	0.0503742	0.00253756	0.988944	0.117493	0.137668	0.319003	0.575982	0.0413782	4.48143	0.0231282	0.101537	0.313649	0.0718395	0.00516091	0.943822	0.142358	0.164273	0.396855	0.793794	0.0651543	5.70112	0.0384088	0.109881	0.38171	0.0820796
39	2	1	0	0.431435	0.451472	0.902017	0.462266	0.0615631	1.92063	0.0340643	0.126473	0.734588	0.133177	0.017736	0.705967	0.26153	0.314165	0.979748	0.594464	0.103614	1.92089	0.0583564	0.188135	0.977957	0.174298	0.0303798	0.779009	0.156308	0.168901	0.365477	0.69155	0.0443127	6.05572	0.0248642	0.0799174	0.363843	0.0640774	0.00410591	0.785287	0.621571	0.645899	1.31268	0.414947	0.0729574	1.30196	0.0402486	0.195214	0.970875	0.175824
39	3	1	0	0.613283	0.669598	1.48588	0.449829	0.121	0.940938	0.0680824	0.3474	1.46647	0.26899	0.0723559	0.889992	0.827751	0.883191	1.92329	0.414084	0.12763	0.750156	0.0712657	0.368769	1.76101	0.308223	0.0950012	0.865086	0.238363	0.291023	0.787448	0.282679	0.0472338	0.955739	0.0266845	0.239775	0.778977	0.167094	0.0279203	0.610944	0.121153	0.152401	0.513901	0.416321	0.0385207	2.53798	0.0217281	0.116389	0.510697	0.0925266
39	4	1	0	0.0251776	0.0285741	0.0789792	0.400254	0.00541699	16.458	0.00301456	0.0167542	0.0784691	0.0135339	0.000183166	0.79047	0.0346675	0.0437734	0.140743	0.359903	0.00963445	7.71174	0.00552631	0.0340552	0.138509	0.0267696	0.00071661	0.738004	0.0157189	0.0187709	0.0491051	0.470472	0.00483482	25.8511	0.00273006	0.0111978	0.0473536	0.0102765	0.000105607	0.807793	0.0160752	0.017967	0.0453272	0.674575	0.00542239	46.309	0.00299217	0.0103661	0.0440967	0.00803823
39	1	1	0	0.0547519	0.0638938	0.186988	0.651643	0.0214867	10.9784	0.011936	0.040305	0.183929	0.0329732	0.00108723	0.865523	0.0485813	0.0599894	0.18336	0.639853	0.0225455	10.3049	0.0127939	0.0416925	0.18301	0.0352355	0.00124154	0.835957	0.0674686	0.0781083	0.227097	0.750624	0.0295767	10.8052	0.0167759	0.0529439	0.221637	0.0394028	0.00155258	0.952552	0.0826499	0.093847	0.240264	0.809109	0.0360117	10.3623	0.0205272	0.0551376	0.233366	0.0445079
39	2	1	0	0.504008	0.521377	1.00092	0.408685	0.054608	1.69583	0.0302774	0.147479	0.722197	0.133619	0.017854	0.73935	0.313642	0.381427	1.33472	0.541219	0.117622	1.4132	0.0667474	0.23656	1.32336	0.217328	0.0472315	0.730473	0.173143	0.189936	0.445448	0.498982	0.0390114	3.53208	0.0215896	0.0925396	0.433269	0.078182	0.00611243	0.765541	0.622274	0.649008	1.23102	0.361169	0.0666643	1.07718	0.0366989	0.191724	0.981342	0.184579
39	3	1	0	0.684767	0.732759	1.56642	0.454122	0.11854	0.98364	0.0670229	0.297609	1.47558	0.261032	0.0681376	0.854611	0.859728	0.921965	2.06091	0.400684	0.133532	0.667583	0.074143	0.460426	1.96919	0.333259	0.111062	0.830804	0.217655	0.260484	0.698642	0.272164	0.0389776	1.05084	0.021553	0.21175	0.696038	0.143214	0.0205102	0.67841	0.113441	0.149915	0.521416	0.38045	0.0373169	2.17068	0.020884	0.10764	0.517219	0.0980864
39	4	1	0	0.0190421	0.0234958	0.0591368	0.463525	0.00638804	19.0518	0.00361847	0.0194813	0.0583745	0.0137814	0.000189928	0.83877	0.0280191	0.0372717	0.113247	0.408604	0.0100555	9.42278	0.00570661	0.0258044	0.111944	0.0246093	0.000605618	0.755953	0.0162747	0.019928	0.0596883	0.505478	0.00582047	24.8344	0.0032928	0.0164016	0.0593463	0.0115148	0.00013259	0.798757	0.0171597	0.0208461	0.086352	0.570001	0.00675525	26.7165	0.0037524	0.0129988	0.0856159	0.0118513
39	1	1	0	0.0528174	0.0618914	0.186461	0.629472	0.0203235	10.8155	0.0112743	0.0404345	0.184348	0.0322865	0.00104242	0.987911	0.0558332	0.0646462	0.172882	0.738819	0.0240923	12.6647	0.0134672	0.0439695	0.17042	0.0326092	0.00106336	1.05314	0.0607498	0.0715034	0.198636	0.709217	0.0267659	10.6156	0.0151199	0.0489209	0.19508	0.0377401	0.00142432	0.989671	0.0777046	0.0908654	0.241968	0.674915	0.031813	8.06433	0.0179176	0.0628636	0.241407	0.0471364
39	2	1	0	0.457017	0.471744	0.97461	0.469096	0.0549001	2.2014	0.0301525	0.116582	0.731973	0.117034	0.013697	0.82071	0.289656	0.347332	1.1193	0.538258	0.103242	1.59262	0.0585929	0.221811	1.10891	0.191808	0.0367902	0.830357	0.183926	0.202195	0.524188	0.530768	0.0446099	3.45768	0.0244252	0.101045	0.515256	0.0840478	0.00706404	0.853352	0.511514	0.531462	1.08476	0.412703	0.0595706	1.55442	0.0323859	0.169741	0.851511	0.144343
39	3	1	0	0.648775	0.714356	1.5965	0.421184	0.126027	0.792245	0.0709318	0.405665	1.54886	0.29922	0.0895326	0.866161	1.07699	1.1346	2.36136	0.385879	0.137841	0.607381	0.0775027	0.418441	1.96315	0.357213	0.127601	0.894952	0.255034	0.296346	0.65889	0.284158	0.0429195	1.02699	0.0234292	0.234052	0.642911	0.151041	0.0228135	0.716119	0.19904	0.232123	0.708935	0.355457	0.0424861	1.64661	0.0235239	0.145561	0.699373	0.119525
39	4	1	0	0.026258	0.0335342	0.0969694	0.27335	0.00570852	7.44694	0.00324778	0.0293989	0.0946591	0.0208836	0.000436123	0.683039	0.0180939	0.0218617	0.0679479	0.616241	0.00757029	28.488	0.00429919	0.0121236	0.0674403	0.0122846	0.000150912	0.85964	0.0135413	0.0162654	0.0616724	0.538383	0.00485724	33.679	0.0027413	0.0111417	0.0613916	0.00902191	8.13949e-05	0.845921	0.0165523	0.0181441	0.043323	0.660171	0.0049121	50.0625	0.00277162	0.00940322	0.0428618	0.00744065
40	1	1	0	0.101158	0.114511	0.343436	0.693829	0.0372861	7.06048	0.0203903	0.0631879	0.340993	0.0537396	0.00288795	0.875186	0.054944	0.0663363	0.168411	0.69845	0.0259982	10.5985	0.0146845	0.0499796	0.167187	0.0372227	0.00138553	0.907419	0.143371	0.159994	0.403153	0.632769	0.044997	4.8597	0.0245745	0.105018	0.401025	0.0711112	0.0050568	0.77484	0.127294	0.144933	0.393532	0.685734	0.0475845	5.53344	0.026645	0.0982375	0.385983	0.0693922
40	2	1	0	0.459216	0.478504	0.947443	0.530252	0.07138	2.18944	0.0396754	0.159571	0.889018	0.134615	0.0181212	0.892847	0.219257	0.256525	0.642881	0.51525	0.0686752	2.1986	0.039058	0.181736	0.63269	0.133285	0.017765	0.939871	0.211312	0.234298	0.532753	0.307857	0.0311873	1.6698	0.0171364	0.142685	0.527028	0.101304	0.0102626	0.763691	0.795409	0.8284	1.39651	0.343431	0.0795648	0.822773	0.0441614	0.348499	1.18316	0.231676
40	3	1	0	0.628299	0.67494	1.33839	0.701097	0.173044	1.61935	0.0986503	0.34408	1.27197	0.246819	0.0609195	1.07189	1.20564	1.24431	2.25962	0.599417	0.184717	1.10242	0.104689	0.404798	1.7855	0.308161	0.0949635	1.08428	0.708992	0.726854	1.11887	0.644709	0.103364	2.26422	0.0582005	0.2234	0.817311	0.160326	0.0257045	0.962017	0.197304	0.235962	0.787905	0.46613	0.060393	2.00015	0.0335754	0.144597	0.783493	0.129562
40	4	1	0	0.0147812	0.0210128	0.0780833	0.207188	0.00309714	7.94963	0.0017764	0.0121211	0.0777989	0.0149485	0.000223457	0.549939	0.0134388	0.0198825	0.0816869	0.271217	0.00397778	10.6997	0.00230154	0.00889803	0.0814056	0.0146664	0.000215103	0.639343	0.0080756	0.0105327	0.0466875	0.421453	0.00285242	35.4584	0.00162423	0.00597463	0.0464791	0.00676805	4.58065e-05	0.812171	0.00776338	0.00965114	0.0350648	0.399025	0.00228994	39.2357	0.0012922	0.0058149	0.0347957	0.00573883
40	1	1	0	0.11858	0.157622	0.61384	0.495762	0.0515553	2.68182	0.0290022	0.0889669	0.607845	0.103992	0.0108144	0.756939	0.114195	0.13928	0.426058	0.576415	0.0460283	3.98877	0.0254342	0.0946281	0.421246	0.0798527	0.00637645	0.817976	0.154721	0.181575	0.600097	0.565492	0.0538161	3.19728	0.0289568	0.11069	0.591721	0.0951667	0.00905671	0.758452	0.154019	0.184618	0.555835	0.537801	0.0548228	2.93652	0.0305148	0.112028	0.549772	0.101939
40	2	1	0	0.384417	0.407265	0.785535	0.36096	0.0486397	1.4869	0.026999	0.142155	0.734859	0.134751	0.0181579	0.713372	0.173801	0.194989	0.486322	0.554084	0.0490735	3.49791	0.0274379	0.13458	0.459521	0.0885668	0.00784408	0.811284	0.313178	0.32543	0.513916	0.361276	0.0320186	2.22988	0.0175149	0.136912	0.382284	0.0886263	0.00785463	0.715458	0.735475	0.756754	1.19805	0.317124	0.0566176	0.967032	0.0308237	0.269363	0.825529	0.178534
40	3	1	0	0.516329	0.572386	1.49419	0.497303	0.122982	1.12194	0.0686139	0.329344	1.41969	0.247298	0.0611565	0.910179	0.940819	1.00666	2.18885	0.343877	0.123264	0.532047	0.0683627	0.41496	1.8845	0.358455	0.12849	0.811194	0.412709	0.429599	0.841309	0.509711	0.060859	2.39774	0.0341825	0.159849	0.719042	0.119399	0.0142561	0.929094	0.156944	0.191997	0.673785	0.389315	0.0431015	1.98783	0.0243647	0.139787	0.661686	0.110711
40	4	1	0	0.0274957	0.033136	0.0828171	0.171897	0.00318281	5.10006	0.00174848	0.0227488	0.0812851	0.0185158	0.000342835	0.499157	0.0167029	0.0223299	0.0785494	0.265156	0.00393456	10.7185	0.00236008	0.0146925	0.0781472	0.0148387	0.000220186	0.663063	0.0148412	0.0186302	0.0663481	0.284126	0.00320372	14.6205	0.00185887	0.0116994	0.0658996	0.0112757	0.000127141	0.653319	0.0083905	0.0103572	0.0302139	0.335708	0.00204105	30.5041	0.00112756	0.00724032	0.0298112	0.00607982
40	1	1	0	0.110576	0.133422	0.476143	0.633312	0.0473609	4.66246	0.0260747	0.0763921	0.469766	0.0747828	0.00559247	0.774006	0.078141	0.0976163	0.311472	0.677317	0.0396909	6.50324	0.022332	0.0610355	0.306726	0.0586001	0.00343398	0.813472	0.140375	0.157124	0.393088	0.602515	0.0426003	4.55906	0.0227911	0.0846505	0.385798	0.0707041	0.00499908	0.728269	0.145765	0.166888	0.455189	0.673635	0.054831	4.65036	0.0308098	0.0875955	0.448728	0.0813957
40	2	1	0	0.384899	0.39714	0.620388	0.58756	0.0575703	3.29551	0.0316384	0.154243	0.481224	0.097982	0.00960047	0.843089	0.177676	0.201621	0.483497	0.612444	0.0584507	3.59152	0.0327133	0.130465	0.45967	0.0954384	0.0091085	0.944884	0.365806	0.375313	0.560269	0.450891	0.0379012	2.95721	0.0208951	0.103763	0.425678	0.0840584	0.00706581	0.865438	0.73591	0.746458	1.09279	0.493763	0.0618317	2.1218	0.0332729	0.158455	0.754746	0.125226
40	3	1	0	0.564677	0.621364	1.34166	0.519057	0.134735	1.11387	0.0750525	0.344821	1.30949	0.259577	0.06738	0.864554	1.17357	1.22995	2.43661	0.404371	0.149017	0.613008	0.0832489	0.481674	2.04102	0.368516	0.135804	0.835685	0.60424	0.623088	1.0004	0.456319	0.0694787	1.64664	0.0381738	0.235842	0.7372	0.152259	0.0231828	0.878236	0.22102	0.253803	0.621938	0.444071	0.0554647	1.96647	0.0306772	0.172786	0.609908	0.1249
40	4	1	0	0.0263596	0.0305245	0.07735	0.251751	0.00388038	9.13533	0.00217034	0.0185548	0.0705915	0.0154135	0.000237577	0.639236	0.0162548	0.0199769	0.0469465	0.269094	0.00312928	13.5573	0.00183338	0.0146469	0.0465012	0.0116289	0.000135232	0.757168	0.011814	0.0135325	0.0401557	0.574211	0.00379491	49.7872	0.0021746	0.00916333	0.0398051	0.00660892	4.36778e-05	0.917414	0.00657601	0.00785276	0.0222418	0.39167	0.00168341	50.0822	0.00092517	0.00557838	0.0218187	0.00429803
40	1	1	0	0.135384	0.156424	0.419084	0.637668	0.0500179	4.60892	0.0283571	0.091579	0.412394	0.0784388	0.00615265	0.949123	0.13283	0.161287	0.495131	0.590657	0.0540954	3.64185	0.0305472	0.107933	0.493382	0.0915852	0.00838785	0.880688	0.147683	0.164836	0.352457	0.607816	0.0445499	4.49065	0.0241245	0.100899	0.338185	0.073295	0.00537216	0.879793	0.153095	0.176367	0.496556	0.618442	0.0542102	3.87827	0.0297991	0.121267	0.488437	0.0876562
40	2	1	0	0.487018	0.511228	1.06928	0.495433	0.0771182	1.73213	0.0419688	0.205641	0.949274	0.155658	0.0242295	0.76667	0.241861	0.283978	1.03438	0.517441	0.077103	1.93266	0.0429118	0.167685	1.023	0.149008	0.0222035	0.853497	0.258027	0.269821	0.541114	0.552211	0.0436248	3.80368	0.023739	0.104147	0.453475	0.0790004	0.00624106	0.880662	0.889127	0.908805	1.42327	0.406219	0.0765042	1.17404	0.0416422	0.267251	0.912186	0.188332
40	3	1	0	0.54192	0.601722	1.29125	0.44431	0.116346	0.965733	0.0662197	0.32602	1.27983	0.261857	0.0685693	0.834064	1.07977	1.14319	2.214	0.342392	0.128726	0.512378	0.072423	0.498873	1.92017	0.375961	0.141347	0.779669	0.476318	0.494521	0.917525	0.466902	0.0621493	1.90517	0.0337565	0.178163	0.81305	0.13311	0.0177183	0.816013	0.142862	0.171299	0.503527	0.448044	0.0424034	2.6163	0.0234341	0.104076	0.49378	0.0946411
40	4	1	0	0.0119209	0.016102	0.0642574	0.258122	0.00279753	13.2752	0.00155934	0.00872428	0.063973	0.010838	0.000117463	0.662203	0.0126143	0.0159407	0.0561189	0.350336	0.00341871	20.3753	0.00194026	0.00898027	0.0557656	0.00975837	9.52258e-05	0.751007	0.01146	0.0145702	0.0557511	0.351169	0.00316372	22.0772	0.00179188	0.00798999	0.0551931	0.00900911	8.11641e-05	0.749301	0.00807249	0.00928538	0.0201173	0.384939	0.00176848	45.9978	0.000970849	0.00728064	0.0197862	0.00459417
40	1	1	0	0.121228	0.143514	0.462182	0.596608	0.0458594	4.25632	0.0251486	0.0814047	0.456339	0.0768669	0.00590852	0.982068	0.108644	0.12897	0.391932	0.639173	0.0444513	5.19381	0.0251199	0.0851409	0.386853	0.069545	0.00483651	1.05387	0.135446	0.151639	0.380351	0.552637	0.0377069	4.4204	0.020579	0.0941341	0.376238	0.0682309	0.00465546	0.874821	0.14359	0.166282	0.499772	0.599227	0.0502833	3.96382	0.0279111	0.0906779	0.492166	0.0839135
40	2	1	0	0.424233	0.442221	0.831512	0.476091	0.0595157	2.08109	0.0325217	0.154349	0.722506	0.125009	0.0156272	0.813364	0.184585	0.207222	0.559491	0.723122	0.068191	4.28039	0.038064	0.133693	0.54379	0.0943008	0.00889264	0.892925	0.134938	0.151165	0.499945	0.487184	0.0332393	3.87197	0.0180239	0.068336	0.486495	0.0682274	0.00465498	0.794157	0.868699	0.888605	1.27747	0.33093	0.0619765	0.958147	0.0336058	0.29754	0.744151	0.18728
40	3	1	0	0.628016	0.687038	1.35372	0.531598	0.148249	1.05153	0.0817781	0.393149	1.30714	0.278874	0.0777705	0.925296	1.31972	1.37345	2.45544	0.412999	0.157257	0.599327	0.0868933	0.601189	2.00832	0.380769	0.144985	0.888405	0.601761	0.62167	1.06934	0.508873	0.0794986	1.77384	0.0432926	0.188905	0.844331	0.156225	0.0244062	0.86434	0.153918	0.17619	0.482032	0.545507	0.0468206	3.59396	0.0264757	0.0977754	0.477709	0.0858295
40	4	1	0	0.0209299	0.0283798	0.119681	0.199574	0.00382906	5.9415	0.00218711	0.0199295	0.118916	0.0191861	0.000368108	0.576759	0.0159112	0.0204023	0.0903933	0.275187	0.00351792	12.2473	0.00200149	0.0125508	0.0896022	0.0127837	0.000163424	0.754449	0.0109705	0.0155276	0.0776103	0.302143	0.00332362	15.566	0.00188354	0.00790827	0.0768833	0.0110002	0.000121004	0.759095	0.00758833	0.00869411	0.0219087	0.511867	0.00217419	66.9118	0.00120721	0.0062291	0.0217143	0.00424756
41	1	1	0	0.226843	0.251698	0.548305	0.542924	0.0592892	2.64116	0.0314969	0.141339	0.541816	0.109203	0.0119254	0.79811	0.155218	0.187245	0.545051	0.622967	0.0653272	3.2337	0.0355596	0.12593	0.538682	0.104865	0.0109966	0.884088	0.337483	0.369875	0.792748	0.490856	0.0743982	1.74061	0.039987	0.214079	0.750774	0.151568	0.0229729	0.797928	0.195038	0.210307	0.393584	0.591314	0.0465808	4.0687	0.0252484	0.114418	0.37034	0.0787752
41	2	1	0	0.261889	0.320098	1.1152	0.260903	0.0480766	0.78967	0.0268136	0.212046	1.11111	0.18427	0.0339554	0.590223	0.296812	0.378521	1.52493	0.333178	0.0783559	0.793056	0.0438627	0.24099	1.51396	0.235177	0.0553084	0.672643	0.179534	0.217413	0.778456	0.295988	0.0363366	1.33875	0.0201762	0.0987281	0.767873	0.122764	0.015071	0.698693	0.384343	0.413069	0.731671	0.255951	0.038783	0.917659	0.0210693	0.229365	0.661692	0.151525
41	3	1	0	0.890399	0.950755	1.96254	0.461778	0.154093	0.772704	0.0860418	0.37148	1.89822	0.333694	0.111352	0.843666	1.33624	1.42202	2.86221	0.404862	0.197141	0.454798	0.107835	0.622432	2.74143	0.486934	0.237105	0.830493	0.337405	0.388318	0.907028	0.335612	0.0645772	0.97817	0.0362157	0.299296	0.887405	0.192416	0.037024	0.773922	0.374318	0.402925	0.919147	0.386557	0.0576996	1.41003	0.0314158	0.22001	0.813451	0.149265
41	4	1	0	0.0300419	0.0356281	0.110893	0.393855	0.00755316	12.318	0.00453029	0.0243306	0.109919	0.0191775	0.000367778	0.952105	0.0361065	0.045357	0.150615	0.445912	0.0122565	9.85358	0.00744436	0.0313042	0.148898	0.0274863	0.000755498	0.898434	0.0158824	0.0206592	0.0774394	0.464628	0.00614639	20.7769	0.00363589	0.0128204	0.0770638	0.0132286	0.000174996	0.873484	0.00993227	0.0122177	0.0399428	0.435079	0.00309951	35.051	0.00177889	0.00636402	0.0398071	0.00712401
41	1	1	0	0.248069	0.316555	1.42113	0.376624	0.0741518	1.01873	0.03949	0.150135	1.40188	0.196885	0.0387638	0.682139	0.221494	0.268216	1.07839	0.533363	0.0807762	1.8988	0.0435511	0.132496	1.07025	0.151447	0.0229361	0.836112	0.313373	0.367943	1.38529	0.442078	0.0853454	1.23066	0.0458672	0.16515	1.36875	0.193055	0.0372703	0.730409	0.256393	0.273993	0.582366	0.583747	0.056468	3.36629	0.0314998	0.121698	0.575573	0.0967337
41	2	1	0	0.410982	0.451212	1.02631	0.364194	0.0679138	1.05591	0.0367178	0.272949	0.991939	0.186477	0.0347737	0.709394	0.512966	0.586675	1.46209	0.376421	0.107302	0.726301	0.0590177	0.352489	1.44339	0.285058	0.0812579	0.780512	0.35363	0.392491	0.818012	0.275164	0.0469135	0.882368	0.0256485	0.254794	0.80615	0.170493	0.0290678	0.649852	0.720043	0.729461	1.02145	0.42478	0.0496929	1.99694	0.0273292	0.164547	0.578493	0.116985
41	3	1	0	1.03699	1.08596	2.04899	0.540247	0.174404	0.935319	0.0974741	0.312411	1.99276	0.322823	0.104215	0.766853	1.68325	1.73937	2.76763	0.499966	0.219387	0.637571	0.122764	0.681982	2.26177	0.438804	0.192549	0.797683	0.570186	0.615227	1.22043	0.380734	0.0880848	0.898071	0.0480693	0.313508	1.15101	0.231355	0.0535251	0.733052	0.445055	0.489981	1.21228	0.287277	0.058953	0.739381	0.0311372	0.248371	1.18046	0.205213
41	4	1	0	0.0406493	0.0568153	0.204324	0.190091	0.00755414	2.87365	0.00453816	0.0345933	0.203386	0.0397396	0.00157923	0.571322	0.021056	0.0251901	0.0657376	0.697868	0.00966046	30.0698	0.00576208	0.0165387	0.0648914	0.0138428	0.000191624	0.999028	0.0155579	0.0191037	0.0776244	0.569304	0.0063186	30.8733	0.00380309	0.0116551	0.0771356	0.0110988	0.000123184	0.927563	0.009928	0.0116121	0.0315242	0.526741	0.00317612	49.2708	0.00179139	0.00673123	0.0311699	0.00602977
41	1	1	0	0.320464	0.364201	1.11329	0.546596	0.0946724	1.68311	0.0504923	0.181339	1.10154	0.173204	0.0299995	0.8103	0.306112	0.360793	0.952759	0.676636	0.12933	1.94418	0.0710273	0.230963	0.944905	0.191137	0.0365334	0.914834	0.39302	0.452113	1.20895	0.53002	0.118554	1.26636	0.063358	0.309419	1.19957	0.223678	0.0500317	0.834704	0.328571	0.340021	0.559096	0.755915	0.0662004	4.79399	0.0367681	0.11575	0.499574	0.0875764
41	2	1	0	0.426753	0.444248	0.772797	0.345818	0.0427382	1.52791	0.0233364	0.199945	0.600565	0.123586	0.0152735	0.767678	0.206656	0.252058	0.704317	0.543993	0.0785969	2.1829	0.0455678	0.178292	0.701098	0.144481	0.0208749	0.843824	0.645248	0.655406	0.962431	0.366501	0.0421762	1.73419	0.0229659	0.149974	0.733878	0.115078	0.013243	0.799298	0.587946	0.60651	1.23468	0.278978	0.0415914	1.0198	0.0226663	0.184231	0.960601	0.149085
41	3	1	0	1.00011	1.04811	1.94955	0.569221	0.178616	1.00821	0.099273	0.347324	1.84995	0.31379	0.0984643	0.919914	1.71818	1.76347	2.79043	0.617468	0.245399	0.849622	0.134197	0.570293	2.22902	0.397428	0.157949	0.953759	0.589461	0.643521	1.36445	0.386038	0.0997473	0.824976	0.0550788	0.384673	1.33052	0.258387	0.0667641	0.791661	0.456716	0.489328	1.12445	0.374879	0.0659007	1.15414	0.0356662	0.204339	1.04498	0.175792
41	4	1	0	0.0358215	0.0503562	0.169558	0.225192	0.00797884	3.84078	0.00482164	0.0320521	0.168674	0.0354314	0.00125538	0.661474	0.0183606	0.022311	0.0850819	0.737708	0.00936132	35.2105	0.00566993	0.0146553	0.0845786	0.0126897	0.00016103	0.961189	0.0151113	0.0177043	0.0613799	0.712831	0.00658286	45.5081	0.00388101	0.0103445	0.0605962	0.00923482	8.52818e-05	0.994591	0.00952173	0.0112269	0.0297208	0.550229	0.00327645	52.0986	0.00184734	0.00839836	0.0295542	0.00595471
41	1	1	0	0.352026	0.41047	1.20578	0.527106	0.111393	1.34211	0.0599383	0.251095	1.17633	0.211329	0.0446598	0.778384	0.33917	0.406699	1.07079	0.493307	0.110832	1.17862	0.0594933	0.262268	1.05001	0.224671	0.050477	0.748102	0.38925	0.45693	1.22829	0.472319	0.113154	1.05834	0.0607431	0.314132	1.20962	0.239571	0.0573944	0.750419	0.366392	0.381697	0.710458	0.611351	0.0654877	3.12935	0.0359082	0.149552	0.630706	0.10712
41	2	1	0	0.47005	0.496371	0.892463	0.336069	0.0536542	1.13796	0.0290054	0.212748	0.851669	0.159652	0.0254889	0.739573	0.336126	0.389737	1.22796	0.424175	0.0837599	1.19764	0.0466993	0.252988	1.21079	0.197466	0.0389927	0.866294	0.597052	0.627268	1.05639	0.27685	0.0533033	0.780301	0.0289254	0.293683	1.00324	0.192535	0.0370696	0.682469	0.776227	0.790872	1.3059	0.285168	0.0432442	1.01403	0.0233187	0.192389	0.769245	0.151645
41	3	1	0	0.974266	1.03073	2.16743	0.550086	0.185249	0.920323	0.104374	0.371259	2.1182	0.336764	0.11341	0.914918	1.58158	1.64618	3.08127	0.534125	0.244101	0.65525	0.136855	0.499092	2.85968	0.457011	0.208859	0.846625	0.572445	0.623576	1.41941	0.377407	0.0934101	0.845922	0.05182	0.294485	1.37088	0.247505	0.0612587	0.810664	0.62525	0.656156	1.32536	0.405509	0.0807672	1.11177	0.0441047	0.250085	1.16923	0.199175
41	4	1	0	0.0261436	0.0315968	0.082528	0.522794	0.00928782	17.3017	0.0054608	0.0213072	0.0815928	0.0177657	0.000315622	0.93982	0.0288053	0.0345265	0.100856	0.681071	0.0129797	21.0133	0.00763202	0.0217994	0.0992241	0.0190578	0.0003632	0.939683	0.0195975	0.0227586	0.0525097	0.762319	0.00883142	37.9607	0.00509474	0.0164195	0.0520854	0.0115849	0.000134211	1.00551	0.011563	0.0135946	0.0444633	0.601137	0.00430267	47.0516	0.00241048	0.00737603	0.0442933	0.00715755
41	1	1	0	0.37573	0.434703	1.37416	0.556201	0.121699	1.36371	0.0652877	0.217663	1.36387	0.218803	0.0478749	0.844829	0.313378	0.360115	0.911473	0.675958	0.120029	2.04608	0.0645138	0.193819	0.883575	0.177568	0.0315304	0.90565	0.446817	0.518944	1.43121	0.603047	0.159296	1.22558	0.0855163	0.306673	1.39449	0.264152	0.0697761	0.855526	0.441938	0.462406	0.85466	0.672273	0.0915439	2.7538	0.0510624	0.176851	0.810911	0.136171
41	2	1	0	0.470685	0.484975	0.765661	0.378972	0.0443291	1.75578	0.0240233	0.178409	0.547251	0.116972	0.0136824	0.854672	0.313452	0.361747	1.06884	0.489751	0.0885217	1.57083	0.0513191	0.208651	1.06049	0.180749	0.03267	0.911153	0.623411	0.641084	1.00162	0.356355	0.0533226	1.31064	0.0293453	0.17192	0.895256	0.149633	0.0223901	0.783128	0.718407	0.732221	1.1825	0.368793	0.0522553	1.43369	0.028784	0.179828	0.79396	0.141693
41	3	1	0	0.752673	0.815379	1.73382	0.551319	0.173027	1.00004	0.0985013	0.384522	1.69272	0.313843	0.0984972	0.973004	1.36092	1.43219	2.38442	0.49348	0.220375	0.628827	0.125406	0.659986	2.19051	0.446573	0.199428	0.918058	0.371047	0.41591	0.957344	0.41859	0.0787202	1.22716	0.0434005	0.239836	0.944608	0.18806	0.0353667	0.815557	0.410014	0.453796	0.960715	0.326398	0.0635303	0.924872	0.0350386	0.287001	0.940581	0.19464
41	4	1	0	0.0344235	0.0454743	0.152043	0.379359	0.0112849	7.49176	0.00662942	0.0281499	0.150395	0.0297472	0.000884894	0.825483	0.0314863	0.0374338	0.114479	0.736063	0.014919	21.425	0.00880178	0.0256935	0.111843	0.0202686	0.000410818	0.976395	0.0201684	0.0240522	0.088291	0.708653	0.00929722	31.2614	0.00538079	0.0151224	0.0879088	0.0131196	0.000172123	1.00064	0.0121067	0.013507	0.0318268	0.720117	0.00431757	66.9965	0.00240838	0.00740981	0.0317443	0.00599566
42	1	0	0	0.139799	0.159453	0.459469	0.495879	0.0380743	3.53337	0.0208305	0.0867126	0.455024	0.0767813	0.00589537	0.804915	0.126893	0.143814	0.443663	0.563384	0.038175	4.60277	0.0211334	0.0852116	0.432273	0.0677603	0.00459146	0.945901	0.114683	0.126673	0.333947	0.628397	0.0338442	6.54292	0.0189789	0.068466	0.3288	0.053858	0.00290068	0.928526	0.231145	0.250877	0.664827	0.494671	0.0482998	2.74689	0.0261879	0.136377	0.617136	0.0976403
42	2	0	0	0.526953	0.553259	0.98587	0.255482	0.0431079	0.802014	0.0228337	0.229235	0.897957	0.168732	0.0284704	0.640148	0.206719	0.227865	0.499539	0.53319	0.0511621	3.229	0.0297304	0.128811	0.486915	0.0959548	0.00920731	1.0909	0.230415	0.254667	0.517197	0.331871	0.0360303	1.72696	0.0203555	0.156096	0.506922	0.108567	0.0117869	0.837016	1.06095	1.08946	1.51837	0.215933	0.0535178	0.456294	0.0280287	0.324717	1.20152	0.247844
42	3	0	0	0.881569	0.963507	2.37944	0.47839	0.186151	0.672633	0.101846	0.488983	2.32848	0.389119	0.151414	0.855554	1.688	1.74979	3.21384	0.483865	0.22318	0.57984	0.123359	0.578217	2.87372	0.461245	0.212747	0.944603	0.254274	0.278197	0.571012	0.352491	0.0398135	1.68398	0.0214833	0.168988	0.54276	0.112949	0.0127575	0.794684	0.460822	0.509594	1.29516	0.288495	0.0628115	0.717535	0.0340129	0.248704	1.20412	0.217721
42	4	0	0	0.0224158	0.0286123	0.0807365	0.258212	0.00459736	8.49616	0.0026933	0.0198621	0.0799	0.0178046	0.000317002	0.661817	0.0170658	0.021932	0.0701842	0.546529	0.00753844	23.6348	0.00449663	0.0145768	0.0700459	0.0137933	0.000190255	0.925983	0.00775398	0.00870239	0.0216447	0.729751	0.00288664	109.362	0.00171121	0.0057108	0.0211764	0.00395565	1.56472e-05	1.05407	0.00812128	0.00940487	0.0370059	0.632039	0.00300161	76.1712	0.00171795	0.00561904	0.0369399	0.00474908
42	1	0	0	0.204214	0.22659	0.556989	0.553511	0.0544175	3.15272	0.0304726	0.11023	0.535435	0.0983134	0.00966552	0.818673	0.200414	0.234429	0.556977	0.535965	0.0652713	2.45491	0.0364089	0.197991	0.545221	0.121783	0.014831	0.877632	0.18262	0.20809	0.470482	0.383588	0.0383173	2.14209	0.0213747	0.149357	0.456366	0.0998919	0.00997839	0.826844	0.303089	0.325696	0.729546	0.493057	0.0588634	2.25794	0.0321818	0.174863	0.68279	0.119385
42	2	0	0	0.590575	0.603358	0.954399	0.348531	0.0431052	1.52445	0.023318	0.166633	0.713134	0.123677	0.015296	0.78695	0.15199	0.167688	0.402549	0.760103	0.0539059	6.12365	0.0307991	0.0952771	0.389433	0.0709192	0.00502953	1.05678	0.39371	0.409195	0.640246	0.363331	0.0405583	1.79301	0.0223428	0.180794	0.504759	0.111629	0.0124611	0.874862	1.16167	1.17812	1.5811	0.249433	0.0489926	0.681648	0.0262975	0.306158	0.828862	0.196416
42	3	0	0	0.77845	0.864948	2.31477	0.553332	0.208845	0.820312	0.116857	0.473636	2.22827	0.377432	0.142455	0.887066	1.53577	1.60171	3.23132	0.551727	0.251226	0.679125	0.140809	0.560639	2.85232	0.455344	0.207338	0.927093	0.249631	0.273261	0.519647	0.407596	0.0453554	2.04133	0.0252761	0.166667	0.511016	0.111275	0.0123822	0.840167	0.410794	0.449673	1.01638	0.325927	0.0596767	0.967982	0.0324516	0.274379	0.953732	0.183098
42	4	0	0	0.024573	0.0367767	0.132749	0.126532	0.00346585	2.70432	0.00202897	0.0249044	0.132535	0.027391	0.000750269	0.385871	0.0167988	0.0219124	0.0719611	0.559195	0.00787592	24.6348	0.0048868	0.0139513	0.0716758	0.0140844	0.00019837	0.914879	0.00592598	0.00697809	0.0190332	0.581146	0.00214356	91.6665	0.00124713	0.00464928	0.0188481	0.0036885	1.3605e-05	0.958405	0.0065787	0.00798276	0.0254822	0.515769	0.00233457	66.3413	0.00135921	0.00508006	0.0253666	0.00452638
42	1	0	0	0.19441	0.222549	0.552554	0.456798	0.0495303	2.28168	0.0268256	0.135665	0.542059	0.10843	0.011757	0.808486	0.177927	0.207575	0.533254	0.502737	0.0538027	2.60647	0.0298525	0.151588	0.529926	0.10702	0.0114532	0.880257	0.1619	0.184132	0.463849	0.421657	0.0370222	2.67344	0.0206099	0.1267	0.461647	0.0878017	0.00770914	0.881605	0.321433	0.345717	0.772328	0.434761	0.0553957	1.83234	0.0297479	0.158697	0.714434	0.127417
42	2	0	0	0.60138	0.617822	1.02137	0.300205	0.0425431	1.13486	0.022791	0.201285	0.733645	0.141714	0.0200827	0.725505	0.197379	0.225539	0.486683	0.549241	0.0599942	2.91631	0.0347957	0.171808	0.484195	0.109231	0.0119314	1.09219	0.219485	0.237321	0.424762	0.37492	0.0338728	2.25811	0.018432	0.140091	0.423014	0.0903469	0.00816257	0.870197	1.21036	1.2279	1.88833	0.240541	0.0497954	0.623709	0.026729	0.316269	1.11941	0.207014
42	3	0	0	0.990203	1.04287	2.51075	0.552004	0.180779	0.924355	0.0991403	0.381025	2.48343	0.327496	0.107253	0.92319	1.78856	1.83965	3.38639	0.495221	0.213371	0.627449	0.11648	0.642128	2.59923	0.43086	0.18564	0.950821	0.251965	0.296529	0.670487	0.286337	0.0448025	0.98987	0.0242341	0.23107	0.664856	0.156468	0.0244821	0.687547	0.385046	0.439147	1.00778	0.233969	0.0494449	0.587782	0.0262508	0.263005	1.00197	0.211331
42	4	0	0	0.0277069	0.0404182	0.161295	0.194722	0.00573719	3.89644	0.00338249	0.0289602	0.160258	0.0294635	0.000868096	0.506711	0.0168934	0.0205463	0.0542998	0.66396	0.00777426	34.1281	0.00467892	0.0141931	0.0540848	0.0117089	0.000137099	0.945549	0.00711698	0.00854251	0.0293582	0.678889	0.00321153	85.4609	0.00191246	0.0045869	0.0292904	0.00473057	2.23782e-05	1.00183	0.00773932	0.00998876	0.0537479	0.50271	0.00317849	46.6591	0.00186527	0.00555998	0.0534714	0.00632271
42	1	0	0	0.275703	0.314919	0.78887	0.452217	0.068893	1.61964	0.0375903	0.213254	0.781638	0.152345	0.023209	0.808847	0.261822	0.295756	0.775032	0.494453	0.0680826	2.00679	0.0380474	0.17791	0.72912	0.137693	0.0189594	0.849833	0.246137	0.274282	0.554409	0.425624	0.0515646	2.0082	0.0294752	0.184202	0.5285	0.12115	0.0146774	0.837293	0.423695	0.457296	1.09477	0.39186	0.0674898	1.22571	0.036358	0.211538	0.996022	0.172229
42	2	0	0	0.602436	0.616935	0.98113	0.347047	0.0462265	1.41021	0.02502	0.204231	0.678879	0.133199	0.0177421	0.675955	0.2782	0.32894	0.811553	0.51387	0.090351	1.67616	0.0518172	0.256697	0.801278	0.175825	0.0309143	0.828704	0.241547	0.262128	0.540927	0.373581	0.0381029	2.03055	0.0211231	0.136221	0.50651	0.101994	0.0104027	0.728529	1.20512	1.21811	1.56225	0.299002	0.0531316	0.89155	0.0281516	0.320863	0.677929	0.177696
42	3	0	0	0.948485	1.00354	2.18999	0.565075	0.185436	0.972601	0.104739	0.394885	2.0564	0.328162	0.10769	0.982998	1.66266	1.72132	3.11421	0.497664	0.221939	0.63133	0.12556	0.64837	2.39858	0.445962	0.198882	1.05158	0.310566	0.369438	0.963917	0.260025	0.0520793	0.695952	0.0279176	0.291186	0.951264	0.200286	0.0401143	0.608249	0.403534	0.436144	0.85284	0.32923	0.0545343	1.07232	0.0294216	0.213705	0.776477	0.165642
42	4	0	0	0.0283197	0.03815	0.123653	0.180108	0.00461135	4.15682	0.00272489	0.0306865	0.120136	0.0256032	0.000655524	0.516443	0.0201147	0.0259031	0.0926863	0.571693	0.0093455	22.1916	0.00593019	0.0163832	0.0917633	0.0163471	0.000267227	0.788898	0.00485953	0.00549583	0.0129661	0.946878	0.00243449	221.996	0.00146749	0.00369904	0.0126214	0.00257107	6.61042e-06	0.870933	0.00731234	0.0105783	0.0459942	0.327679	0.00250882	24.8821	0.00145858	0.00470819	0.0458892	0.00765633
42	1	0	0	0.258179	0.291552	0.757098	0.495808	0.0672241	2.00504	0.0368591	0.190122	0.755624	0.135585	0.0183833	0.841733	0.26242	0.298646	0.750078	0.554007	0.0790638	2.19419	0.0446888	0.186611	0.733607	0.142712	0.0203668	0.936706	0.289861	0.32148	0.773807	0.488367	0.0679683	1.96513	0.0380638	0.224882	0.766625	0.139175	0.0193696	0.857373	0.343352	0.363106	0.860921	0.507182	0.0599761	2.39704	0.03352	0.145779	0.829379	0.118254
42	2	0	0	0.639317	0.660315	1.08717	0.301719	0.0498967	0.967255	0.0264532	0.239539	0.94059	0.165375	0.0273487	0.691207	0.224814	0.252138	0.584614	0.586331	0.0670071	2.97609	0.0388689	0.159087	0.577726	0.114282	0.0130604	0.999603	0.288148	0.306597	0.706812	0.409127	0.0429025	2.15348	0.0236804	0.152914	0.672422	0.104863	0.0109963	0.838934	1.2383	1.25553	1.86936	0.301373	0.0625448	0.765057	0.0329509	0.27407	1.04448	0.207533
42	3	0	0	0.785885	0.844427	1.77061	0.515803	0.15948	0.920721	0.0880179	0.400921	1.72829	0.309187	0.0955967	0.961533	1.49383	1.54261	2.69764	0.507572	0.195507	0.736044	0.109202	0.482521	2.47798	0.385181	0.148364	0.982652	0.261565	0.327866	1.14173	0.230185	0.0455414	0.630205	0.0246684	0.246494	1.12572	0.197847	0.0391435	0.590282	0.361875	0.399352	0.944195	0.303806	0.0513556	0.976113	0.0278923	0.179105	0.911006	0.169041
42	4	0	0	0.0121293	0.0182937	0.0697156	0.239546	0.00328284	10.3713	0.00194785	0.0103751	0.0695011	0.0137044	0.00018781	0.627153	0.0167188	0.0262161	0.169874	0.354319	0.00716001	10.573	0.00431755	0.0103538	0.169625	0.0202078	0.000408356	0.688365	0.0049455	0.00607684	0.0198324	0.617745	0.00218301	102.002	0.0012738	0.00384581	0.019764	0.00353384	1.2488e-05	0.999422	0.00689018	0.00937878	0.0626301	0.391047	0.00249	34.8142	0.00141155	0.00470898	0.0623716	0.00636752
[truncated: 362 more columns]
