# Supplementary material for: On the Use of t-Distributed Stochastic Neighbor Embedding for Data Visualization and Classification of Individuals with Parkinson's Disease
Source: Comput Math Methods Med. 2018 Nov 4;2018:8019232. doi: 10.1155/2018/8019232 (PMC6247646; doi:10.1155/2018/8019232)
Supplement: Supplementary Materials — The attached supplementary material file includes three tables containing features estimated from signals of the executed tasks. Each table includes features extracted from filtered signals, instantaneous frequency, and instantaneous amplitude, respectively. [file 8019232.f1.zip › 8019232.f1/FeatMatrix_IF.xlsx]

## Sheet: Planilha1
Subject	Activity	Pathological	DBSuser	Gyro1MAV	Gyro1RMS	Gyro1PEAK	Gyro1MAVSDN	Gyro1MAVSD	Gyro1MAVFDN	Gyro1MAVFD	Gyro1INTERQRANGE	Gyro1RANGE	Gyro1STD	Gyro1VAR	Gyro1APPENTROPY	Gyro1XMAV	Gyro1XRMS	Gyro1XPEAK	Gyro1XMAVSDN	Gyro1XMAVSD	Gyro1XMAVFDN	Gyro1XMAVFD	Gyro1XINTERQRANGE	Gyro1XRANGE	Gyro1XSTD	Gyro1XVAR	Gyro1XAPPENTROPY	Gyro1YMAV	Gyro1YRMS	Gyro1YPEAK	Gyro1YMAVSDN	Gyro1YMAVSD	Gyro1YMAVFDN	Gyro1YMAVFD	Gyro1YINTERQRANGE	Gyro1YRANGE	Gyro1YSTD	Gyro1YVAR	Gyro1YAPPENTROPY	Gyro1ZMAV	Gyro1ZRMS	Gyro1ZPEAK	Gyro1ZMAVSDN	Gyro1ZMAVSD	Gyro1ZMAVFDN	Gyro1ZMAVFD	Gyro1ZINTERQRANGE	Gyro1ZRANGE	Gyro1ZSTD
4	1	1	1	7.91039	7.92795	8.83468	0.0827563	0.0436856	0.078535	0.0218846	0.826372	1.92399	0.527883	0.27866	0.260811	7.22721	7.24409	8.24025	0.0721737	0.0357151	0.0729639	0.0178671	0.825917	2.03136	0.49485	0.244876	0.225547	8.59309	8.60316	9.20181	0.0846803	0.0352862	0.101831	0.0176817	0.579196	2.04359	0.416699	0.173638	0.235205	6.83595	6.86027	8.4855	0.0686296	0.0396521	0.0594054	0.0198306	0.544998	2.57074	0.57777
4	2	1	1	4.61934	4.6693	6.44496	0.0572292	0.0390323	0.0420186	0.0195458	0.654406	2.60482	0.682034	0.46517	0.162348	6.73867	6.76845	7.58859	0.0709452	0.0450498	0.0559139	0.0225454	0.991989	2.62206	0.634994	0.403217	0.192765	4.52413	4.55379	5.45505	0.0778413	0.0404401	0.0747821	0.0201837	0.87961	1.82039	0.519519	0.2699	0.212501	4.31541	4.37168	5.70033	0.0449541	0.0314706	0.0320504	0.0157075	1.00431	2.36779	0.700061
4	3	1	1	7.43774	7.46611	8.6814	0.0503691	0.0327883	0.0387268	0.0164105	0.667357	3.34733	0.650961	0.42375	0.0964403	5.87215	5.91736	7.34812	0.0639294	0.046727	0.043696	0.023344	0.706419	3.38816	0.730916	0.534237	0.156135	6.46531	6.47383	7.39972	0.069425	0.0230844	0.104249	0.0115259	0.452381	1.6121	0.332508	0.110562	0.228011	5.46747	5.49012	6.52442	0.0756695	0.0377393	0.0760397	0.0189141	0.625994	2.417	0.498738
4	4	1	1	8.93672	9.00639	9.95368	0.0330712	0.0370209	0.0147872	0.0185302	2.10562	3.34882	1.11943	1.25313	0.0575069	6.43463	6.43937	7.63054	0.0596422	0.0147515	0.12095	0.00739891	0.241058	1.5223	0.247333	0.0611735	0.103554	6.61058	6.62526	7.67338	0.0552873	0.0244028	0.0629118	0.0122564	0.676113	1.65545	0.441382	0.194818	0.156008	6.85602	6.88455	7.99016	0.0766437	0.0480483	0.0610964	0.0240115	0.879416	2.21505	0.626905
4	1	1	1	7.6083	7.63024	9.02057	0.0722166	0.0417981	0.0624125	0.0209079	0.773482	2.70149	0.578788	0.334996	0.222558	7.65912	7.68612	9.18203	0.0938269	0.0604534	0.0728034	0.0302231	0.955894	2.84969	0.644308	0.415133	0.293653	7.97803	7.98941	8.89251	0.0566982	0.0241889	0.0663941	0.0120843	0.699744	1.60777	0.426625	0.182009	0.151181	6.67433	6.72241	9.14398	0.0578539	0.0464749	0.0360334	0.0232529	0.864035	3.70404	0.803315
4	2	1	1	4.9862	5.02443	6.53438	0.101842	0.0630934	0.0822377	0.0315636	0.679002	2.9034	0.619524	0.383809	0.325234	6.91482	6.9217	7.42536	0.0967599	0.0299039	0.156983	0.014994	0.543906	1.03246	0.309053	0.0955136	0.290649	4.24867	4.25661	4.71049	0.0971009	0.0252753	0.186468	0.0126343	0.313243	1.04237	0.260299	0.0677558	0.297268	4.24234	4.31415	6.328	0.0623468	0.0489362	0.0396759	0.0244432	0.716584	3.36594	0.784902
4	3	1	1	7.66472	7.70101	9.63971	0.0543403	0.0406226	0.03632	0.0202973	1.11762	2.90196	0.74756	0.558846	0.14278	5.8731	5.88156	6.72103	0.0816944	0.0257898	0.129391	0.0128949	0.55895	1.35857	0.315686	0.0996577	0.225823	6.46787	6.48474	7.6294	0.0824754	0.038595	0.0885336	0.0193875	0.628482	1.98609	0.467958	0.218984	0.269089	5.696	5.70659	6.46052	0.0608917	0.0211806	0.0876118	0.0106004	0.318863	1.73483	0.34784
4	4	1	1	8.74684	8.7816	10.0068	0.0460655	0.0360082	0.0294289	0.0179814	0.912848	2.65723	0.781673	0.611012	0.100819	6.60048	6.6482	8.95384	0.0514918	0.0410019	0.0323819	0.0205322	0.488593	3.0567	0.796281	0.634064	0.105036	6.33109	6.35855	7.59877	0.070172	0.0414792	0.0592684	0.0207089	0.862981	2.05743	0.591108	0.349408	0.19527	7.34951	7.40151	9.06829	0.0822914	0.0721682	0.0468868	0.0360606	1.43575	3.26144	0.876984
4	1	1	1	8.28914	8.32299	9.53879	0.0588697	0.0441921	0.0392757	0.0221325	1.16477	3.1326	0.750677	0.563515	0.155822	7.06958	7.10856	8.86926	0.0624431	0.0464676	0.0420094	0.0232638	0.943171	2.79951	0.74416	0.553774	0.185034	7.63269	7.66607	9.13467	0.0580584	0.0415355	0.0405638	0.020761	0.89135	2.76695	0.71541	0.511811	0.145283	6.37159	6.39031	7.41411	0.0662883	0.0324282	0.0678773	0.0162441	0.614713	1.8134	0.489199
4	2	1	1	4.89293	4.93473	6.11211	0.0705284	0.0452515	0.0549311	0.0226129	0.963608	2.28227	0.641606	0.411659	0.221201	7.03401	7.04986	8.01432	0.0404286	0.0191184	0.0427977	0.00957072	0.563088	1.89574	0.472892	0.223627	0.0891768	4.85832	4.90183	6.7499	0.0777972	0.0507445	0.0596884	0.0253945	0.666437	3.12594	0.652266	0.425451	0.243475	3.61254	3.68236	4.97935	0.0553101	0.0395152	0.0387394	0.019773	1.02323	2.82852	0.71443
4	3	1	1	7.91257	7.95215	9.94289	0.0478846	0.0379822	0.0302297	0.0190197	0.843145	3.54472	0.793204	0.629172	0.102067	5.86376	5.88916	6.78692	0.0648225	0.0354548	0.0592192	0.0177159	0.643793	2.353	0.546953	0.299157	0.19638	6.18202	6.19109	6.94725	0.0504052	0.0169027	0.0751791	0.00845393	0.463955	1.41988	0.335336	0.112451	0.124644	5.91051	5.94249	7.16601	0.0535367	0.0329972	0.0434619	0.0165105	1.07295	2.36363	0.616347
4	4	1	1	7.25582	7.28206	8.28928	0.079887	0.0494063	0.0647205	0.0247545	0.619422	2.41292	0.618452	0.382483	0.250169	6.47982	6.50625	7.95835	0.0680593	0.0399317	0.0579423	0.019946	0.792634	2.29629	0.586719	0.344239	0.183843	6.13392	6.14481	6.95707	0.0570358	0.0208821	0.0779175	0.0104445	0.459418	1.34514	0.366122	0.134045	0.148574	7.39595	7.4435	9.0311	0.04251	0.0357564	0.0252499	0.0178642	1.59401	2.72674	0.841127
4	1	1	1	8.34821	8.41129	9.70239	0.0641186	0.0660064	0.0311735	0.0330361	1.95915	3.215	1.02944	1.05975	0.175933	7.25883	7.26865	8.29524	0.0542845	0.0205288	0.0717178	0.0102566	0.424294	1.57202	0.37817	0.143013	0.135975	7.66077	7.68336	8.82807	0.075861	0.0447183	0.0643226	0.022351	0.869563	2.12781	0.589476	0.347483	0.218033	6.29162	6.31485	7.66572	0.083688	0.0453434	0.0771643	0.0226526	0.844731	2.16289	0.541815
4	2	1	1	4.83672	4.94073	7.56962	0.0725434	0.0732334	0.0360683	0.0367577	1.30238	4.41661	1.00951	1.01911	0.213535	6.7446	6.75917	7.54033	0.0913362	0.0405566	0.102998	0.0203079	0.766606	1.62864	0.444037	0.197169	0.289225	4.92656	5.02958	7.19558	0.0622487	0.0631089	0.0306677	0.0315211	1.17437	3.72599	1.01382	1.02783	0.180787	3.89251	3.98391	6.34004	0.0675996	0.0574192	0.0398437	0.0287465	0.930294	4.29751	0.8494
4	3	1	1	6.79925	6.8291	8.02437	0.0874791	0.0558662	0.0685653	0.0279637	1.04448	2.54031	0.638623	0.40784	0.281377	5.38735	5.39952	6.08897	0.0683628	0.0248016	0.094536	0.0124427	0.471571	1.66387	0.362793	0.131619	0.171825	6.17598	6.20854	7.3417	0.0588021	0.0373807	0.0461879	0.0186655	1.06776	2.44613	0.635704	0.40412	0.163153	5.36298	5.37339	6.20458	0.0865453	0.0289748	0.129598	0.0145262	0.513894	1.37697	0.334794
4	4	1	1	9.0567	9.07744	10.0343	0.0628121	0.0385755	0.0512319	0.0193232	0.693944	2.52051	0.614142	0.377171	0.155695	6.66484	6.68856	8.21305	0.0637193	0.035909	0.0564291	0.0179212	0.65427	2.06824	0.56355	0.317588	0.167882	6.5558	6.58019	7.82409	0.0590697	0.0334808	0.0521729	0.0167613	0.627258	1.91942	0.566801	0.321264	0.159963	6.36993	6.38298	7.16034	0.0830616	0.0339396	0.101782	0.0169937	0.546591	1.63311	0.408608
4	1	1	1	8.7611	8.78768	10.2159	0.0615016	0.0420521	0.0449448	0.0210127	0.796322	2.78633	0.683756	0.467522	0.175544	7.44631	7.47192	8.45363	0.0646361	0.0400004	0.0521386	0.0199681	0.834334	2.63976	0.618855	0.382981	0.158887	7.68283	7.69547	8.42798	0.0418053	0.0184481	0.0473664	0.00922388	0.844913	1.36122	0.441287	0.194735	0.0991477	5.9188	5.92281	6.31613	0.0661765	0.0144421	0.15191	0.00723504	0.264041	0.843834	0.218236
4	2	1	1	4.66743	4.69941	6.02609	0.109672	0.0601037	0.0999673	0.0300238	0.763503	2.40705	0.548029	0.300336	0.365727	6.5988	6.61911	7.50254	0.0890286	0.0461816	0.0860335	0.0231498	0.715173	1.95804	0.518728	0.269079	0.270037	4.68392	4.7583	6.9224	0.0365731	0.0306852	0.0218273	0.0153651	0.617167	3.07067	0.839011	0.703939	0.064901	4.08551	4.12217	5.57318	0.0738529	0.0405631	0.0673117	0.0203056	0.74381	2.54301	0.549241
4	3	1	1	7.20118	7.25398	8.63423	0.0293683	0.0256874	0.0167701	0.0128298	1.58801	2.84443	0.874664	0.765037	0.0581221	5.79843	5.8381	6.82968	0.073557	0.0500405	0.0540027	0.0249925	0.890849	2.54707	0.680295	0.462801	0.220686	6.62556	6.64398	7.3941	0.0835596	0.0413663	0.0843366	0.0206689	0.721733	1.84035	0.495052	0.245076	0.261286	5.99497	6.03943	7.4135	0.0684957	0.0501709	0.0467632	0.0250889	1.04708	2.84268	0.732468
4	4	1	1	8.33139	8.38573	10.0981	0.0644058	0.0614686	0.0337476	0.0307397	1.67483	3.2081	0.954395	0.910869	0.190004	7.66818	7.71707	8.50492	0.0275102	0.0238927	0.0158249	0.0119367	1.38132	2.52638	0.868504	0.754299	0.0439876	6.63511	6.64974	7.73697	0.0577112	0.0254829	0.0653271	0.0127371	0.51453	1.64753	0.441559	0.194974	0.147148	6.65786	6.66755	7.34049	0.0737098	0.0265293	0.102496	0.0132773	0.564296	1.24967	0.359916
5	1	1	1	6.83972	6.89344	8.25523	0.0589479	0.0506729	0.0342771	0.0253291	1.43804	2.96105	0.859623	0.738951	0.162888	6.8379	6.86471	7.96275	0.0598521	0.0363059	0.0493042	0.0181418	0.920411	2.50333	0.606594	0.367956	0.168934	6.97214	7.10865	9.62458	0.036954	0.0512725	0.01332	0.0256419	2.48828	4.91585	1.38747	1.92506	0.0885454	6.49369	6.57588	8.2003	0.0424925	0.0440735	0.0204987	0.0220525	2.0667	3.14337	1.03721
5	2	1	1	4.21279	4.27178	5.59103	0.0696717	0.0493474	0.0491833	0.0246736	0.95545	2.78669	0.708285	0.501667	0.201719	5.19313	5.2314	6.05685	0.0743643	0.0470232	0.0588506	0.0235313	1.10506	2.16192	0.632335	0.399848	0.217594	4.65955	4.73733	6.36192	0.0878471	0.0751854	0.0512837	0.0375657	1.35017	3.37905	0.855866	0.732507	0.278917	2.69726	2.75782	4.00114	0.060176	0.0346252	0.0522993	0.0173154	0.654933	2.29945	0.575399
5	3	1	1	4.80596	4.86505	6.16194	0.0865984	0.0655424	0.0572519	0.0327956	0.910904	3.20659	0.756855	0.57283	0.271764	3.81496	3.93326	6.41226	0.0603106	0.0578096	0.0315274	0.0289669	1.12406	3.82561	0.958532	0.918784	0.155604	5.06576	5.14379	7.43273	0.0799278	0.0714217	0.0447164	0.0357052	0.875719	3.49141	0.893578	0.798481	0.214802	3.22144	3.30203	4.4849	0.0703221	0.0510474	0.0484729	0.0255425	1.23287	2.42732	0.725909
5	4	1	1	6.58715	6.68313	8.77682	0.0491361	0.0555313	0.021768	0.027803	1.58506	3.83959	1.13015	1.27725	0.130018	7.30797	7.33566	8.10464	0.0691241	0.0440813	0.0543218	0.0220914	0.827093	2.34107	0.637712	0.406677	0.187767	7.24399	7.31145	9.77318	0.0694717	0.0689354	0.0350108	0.0344723	1.28708	3.79003	0.992279	0.984619	0.200814	5.71616	5.73987	6.34873	0.0648318	0.0338408	0.0621468	0.0169326	0.700863	1.95051	0.521978
5	1	1	1	6.18997	6.2194	7.80718	0.0600306	0.0363125	0.0496777	0.0181773	0.819766	2.43626	0.6049	0.365904	0.160823	7.0451	7.06813	7.95601	0.0916119	0.0522835	0.0803544	0.0261719	0.738538	2.2688	0.570706	0.325706	0.266847	6.5945	6.60983	7.33532	0.0755371	0.0340214	0.0839372	0.017027	0.580455	1.90382	0.450394	0.202854	0.217152	5.17434	5.2128	6.27634	0.0795013	0.0503046	0.0628539	0.0251651	0.986118	2.37302	0.632752
5	2	1	1	3.80574	3.83306	4.82462	0.0654547	0.0299326	0.0716218	0.014978	0.778584	1.59608	0.457303	0.209126	0.184857	5.59897	5.65075	6.81448	0.0762877	0.0582874	0.0499767	0.0291748	1.34724	2.73725	0.764047	0.583768	0.21676	5.20135	5.22857	6.64921	0.0715152	0.0381489	0.0671063	0.0190954	0.541609	2.44704	0.533437	0.284555	0.190336	2.86427	2.90343	4.31611	0.0571253	0.0271791	0.0603829	0.0136687	0.476846	2.54394	0.475781
5	3	1	1	4.55007	4.57512	5.36428	0.091778	0.0439291	0.095917	0.0219747	0.815584	1.67922	0.478645	0.229101	0.280761	3.62461	3.70775	5.19327	0.0692389	0.0541249	0.0443513	0.0271019	1.18477	2.58563	0.781712	0.611074	0.188199	4.47809	4.52239	5.76037	0.0615694	0.0389258	0.0487343	0.0194796	0.969564	2.17656	0.632226	0.399709	0.181672	3.4196	3.46449	4.42262	0.0706552	0.0393251	0.0634115	0.0196436	1.033	1.78526	0.556578
5	4	1	1	4.58909	4.85078	6.82809	0.0565163	0.0890502	0.0178938	0.0444248	2.62535	4.83843	1.57566	2.48269	0.109574	5.85818	5.91123	7.18769	0.0980439	0.0776657	0.0617408	0.0387426	1.14141	2.91289	0.792152	0.627504	0.265504	6.19652	6.24452	7.58544	0.07628	0.0590911	0.0490402	0.029429	1.35253	2.70177	0.77466	0.600099	0.171611	5.65327	5.69396	6.35579	0.0487129	0.033184	0.0356889	0.0165616	0.918043	2.08395	0.681217
5	1	1	1	6.30695	6.35426	7.24611	0.0497133	0.0385252	0.0320809	0.019266	1.48574	2.44763	0.774948	0.600545	0.139943	6.88114	6.90214	7.77476	0.0469593	0.0252973	0.0436999	0.0126819	0.702933	2.1452	0.538707	0.290205	0.108997	5.84988	5.86577	6.68455	0.104819	0.0452784	0.121841	0.022735	0.563819	1.73373	0.431967	0.186595	0.325028	4.97997	5.01873	6.49903	0.0654586	0.0408041	0.0525011	0.0204006	0.686451	2.44051	0.623357
5	2	1	1	4.3685	4.40513	5.21431	0.0498095	0.0282816	0.044022	0.0141923	1.01453	1.94301	0.567795	0.322391	0.121415	5.16443	5.21205	6.20687	0.0798081	0.0561796	0.0566021	0.0280476	1.18167	2.49956	0.703934	0.495523	0.237492	6.00034	6.02596	6.93725	0.0649826	0.0361233	0.0585217	0.0180841	0.841298	2.01569	0.555891	0.309015	0.162189	3.15781	3.19518	4.14306	0.0684063	0.0333802	0.0701786	0.0167105	0.525864	1.92538	0.487969
5	3	1	1	4.79731	4.85333	5.90327	0.0731148	0.0538319	0.049616	0.0268961	0.859401	2.9373	0.736265	0.542086	0.240437	3.89226	4.02764	5.41075	0.0560331	0.0580966	0.0270231	0.0290502	1.35305	3.91864	1.03683	1.07501	0.147132	4.71272	4.76501	6.12551	0.0574846	0.0405187	0.0408735	0.0203071	1.08781	2.7839	0.704861	0.496829	0.171852	3.01916	3.07787	4.29838	0.0763332	0.0457285	0.06373	0.0228713	0.797845	2.26382	0.599064
5	4	1	1	5.21064	5.30861	6.79736	0.0632064	0.064233	0.031174	0.0321949	1.46507	3.95228	1.01624	1.03275	0.17743	6.7739	6.84566	8.95064	0.0583948	0.057788	0.0295056	0.0288956	1.45887	3.88672	0.989609	0.979326	0.144007	6.68512	6.82832	9.06941	0.0535096	0.0745163	0.0192059	0.0372456	1.95093	5.26683	1.39258	1.93927	0.140609	5.7992	5.88821	7.79203	0.0804302	0.0821213	0.0394437	0.0411198	1.46024	4.13181	1.02103
5	1	1	1	6.74786	6.77643	7.76606	0.0756543	0.0470838	0.0609728	0.0236163	1.05523	2.19476	0.622355	0.387325	0.213771	6.27475	6.29355	7.1552	0.082145	0.0399741	0.0844303	0.0199937	0.582638	1.85013	0.486628	0.236807	0.248948	7.02798	7.09586	8.7854	0.0574459	0.0563179	0.0293653	0.0282233	1.18505	3.66603	0.980363	0.961112	0.144775	6.20948	6.264	7.49573	0.0434712	0.0358927	0.0264026	0.0179993	1.41974	2.73407	0.825665
5	2	1	1	3.85454	3.90012	4.96384	0.0892309	0.0531063	0.0748673	0.0265188	0.926928	2.15536	0.595156	0.35421	0.276998	5.49242	5.51612	6.27091	0.1045	0.0534369	0.102143	0.026709	0.935084	1.64954	0.511359	0.261488	0.309809	5.29768	5.36065	6.64824	0.068339	0.056042	0.041681	0.0280304	1.26958	3.15415	0.82006	0.672498	0.21062	2.71913	2.77828	3.73391	0.0769141	0.0439046	0.0674751	0.0219863	0.988643	2.10395	0.570826
5	3	1	1	4.22614	4.24275	5.2169	0.0773075	0.0290288	0.102885	0.0145067	0.598026	1.74282	0.375498	0.140998	0.228953	3.48954	3.53395	4.97748	0.0922625	0.0515862	0.0824582	0.0257781	0.803724	2.47759	0.559125	0.31262	0.28754	4.31084	4.35063	5.81042	0.078806	0.0463132	0.0671461	0.0231906	0.647402	2.96269	0.587687	0.345375	0.260774	3.23641	3.28708	4.75846	0.0881396	0.0507312	0.0767241	0.0254179	0.712706	2.52182	0.575577
5	4	1	1	5.06976	5.33665	7.3755	0.0513322	0.085656	0.0153981	0.042875	2.37378	6.13833	1.66866	2.78443	0.12258	6.79104	6.89852	8.67712	0.0652852	0.0792878	0.026875	0.0396398	2.38195	4.00003	1.21448	1.47497	0.194464	7.84154	7.88439	9.10842	0.0708171	0.0582039	0.0431387	0.0291403	0.938951	3.55003	0.82189	0.675503	0.190731	5.48146	5.55	7.08669	0.0836719	0.0728482	0.0481264	0.0364806	1.26938	3.13924	0.870641
5	1	1	1	6.0629	6.13738	7.62167	0.0630545	0.0601833	0.0331741	0.0302218	1.03016	4.07117	0.954465	0.911003	0.176845	7.38229	7.40755	8.36718	0.0596979	0.036539	0.0488529	0.0183015	0.627678	2.59903	0.612066	0.374624	0.145118	6.16596	6.21006	7.526	0.0971123	0.0718386	0.0657343	0.0359716	1.14982	3.03216	0.739748	0.547226	0.294218	5.60718	5.63602	6.43112	0.0850235	0.0484758	0.0748144	0.0243197	0.747327	2.18601	0.570146
5	2	1	1	3.65256	3.68542	4.47266	0.0697059	0.0342615	0.0709634	0.0171438	0.822708	1.75737	0.491515	0.241587	0.187823	4.74754	4.82821	6.43138	0.0910887	0.0801367	0.051811	0.0401011	1.59134	3.159	0.879766	0.773988	0.283076	5.0026	5.0444	6.10342	0.0559	0.0362605	0.043083	0.018128	1.21143	2.23881	0.648666	0.420768	0.144485	2.81289	2.87488	4.19793	0.0884439	0.052569	0.0745899	0.0263514	0.690634	2.80184	0.594377
5	3	1	1	4.44111	4.48133	6.21089	0.0587268	0.03521	0.0490003	0.017614	0.500633	3.22737	0.599557	0.359468	0.145776	3.33794	3.39991	4.63457	0.0638282	0.0412794	0.0494771	0.0206941	0.93243	2.82088	0.646727	0.418256	0.193173	4.26806	4.34035	5.80834	0.0786968	0.0621349	0.0498052	0.0310478	1.25436	3.08045	0.789547	0.623385	0.237199	2.92314	3.00537	4.55613	0.0688744	0.0481319	0.0493735	0.0241126	0.895127	3.25387	0.698835
5	4	1	1	5.85969	6.00075	8.00416	0.0668536	0.0865538	0.0258119	0.0432657	1.73149	5.24732	1.29468	1.67619	0.193628	7.37148	7.47744	9.55477	0.0512111	0.0642962	0.0204246	0.0321955	1.54931	5.66156	1.25551	1.57631	0.127627	6.55554	6.60803	7.62737	0.0496665	0.041322	0.029813	0.0206367	1.4407	2.99729	0.831989	0.692206	0.139608	5.04126	5.2241	8.00677	0.0581747	0.0797739	0.0212744	0.0400048	2.20095	5.42333	1.37128
6	1	1	1	7.23881	7.24998	8.07746	0.0697359	0.0280786	0.0866338	0.0140451	0.700039	1.54737	0.402642	0.16212	0.205414	6.88336	6.91646	8.63099	0.0558408	0.0377767	0.0413041	0.0189033	0.664431	3.43826	0.676507	0.457662	0.168263	5.8843	5.91815	7.41584	0.0460485	0.0291336	0.0363639	0.0145555	0.755119	2.77287	0.632672	0.400274	0.105265	7.2647	7.30178	8.48753	0.054493	0.0400838	0.0371217	0.0200856	1.27874	2.42441	0.735578
6	2	1	1	4.69439	4.71997	5.48494	0.0650438	0.0319576	0.0662144	0.0159841	0.73165	1.64736	0.491324	0.2414	0.165665	5.67328	5.74171	7.551	0.0650437	0.0575505	0.0367606	0.0287787	1.14406	3.67205	0.884798	0.782868	0.197933	3.67487	3.70997	4.38145	0.0332406	0.0169411	0.0326059	0.00846924	1.06972	1.37643	0.509652	0.259746	0.0767149	4.53456	4.57011	5.54011	0.0874469	0.049804	0.0766991	0.0248788	0.966911	2.0986	0.569534
6	3	1	1	6.90227	6.9688	8.35456	0.0663824	0.0638332	0.034521	0.0319205	1.39712	3.69237	0.961597	0.92467	0.190984	6.03059	6.08981	7.62149	0.0423634	0.0359274	0.0250348	0.0180059	1.64862	2.83027	0.848078	0.719236	0.104209	6.42232	6.45893	7.45057	0.044475	0.0305749	0.0323503	0.015289	1.15473	2.26399	0.687464	0.472607	0.104479	6.58736	6.63265	7.77357	0.0364465	0.0282291	0.0235539	0.0141301	1.32055	2.83219	0.774536
6	4	1	1	7.39457	7.43204	8.33806	0.0439752	0.0328186	0.0294888	0.0164242	1.11391	2.60226	0.746299	0.556962	0.091462	8.35279	8.38878	9.8213	0.0490213	0.0380982	0.0315716	0.0190694	0.984632	3.24928	0.777177	0.604004	0.10258	7.1141	7.12351	7.68912	0.0643136	0.0235684	0.0877694	0.0117868	0.492252	1.57686	0.366461	0.134293	0.136539	7.58639	7.63169	9.34783	0.050074	0.0416279	0.0301304	0.0208233	0.866801	3.67673	0.831328
6	1	1	1	7.99228	8.03471	9.76134	0.0607312	0.0501464	0.036804	0.0250929	1.43748	2.87826	0.82571	0.681797	0.152196	7.50253	7.51901	8.34418	0.0892377	0.0444514	0.0894407	0.0221926	0.739441	1.87891	0.498123	0.248126	0.276964	5.53972	5.58559	6.8149	0.0632204	0.0452172	0.0441359	0.022578	1.02762	2.75361	0.715231	0.511556	0.180847	7.01269	7.03463	8.04663	0.0639221	0.0355297	0.0576061	0.0177971	0.81002	2.34841	0.555828
6	2	1	1	5.55976	5.58736	6.51416	0.0606312	0.0336729	0.0546345	0.0168514	0.958741	1.79829	0.555373	0.308439	0.158252	5.53471	5.55021	6.34261	0.0556766	0.0231032	0.0670435	0.0115439	0.693787	1.64823	0.414953	0.172186	0.156875	4.62103	4.67952	6.71187	0.0627495	0.0463312	0.0425059	0.0231726	0.987685	3.01673	0.738351	0.545162	0.174539	5.259	5.33991	7.35015	0.072424	0.0671388	0.039136	0.0336324	1.39236	3.74314	0.927024
6	3	1	1	6.85029	6.86513	7.97674	0.0761281	0.0343792	0.0843908	0.0172106	0.450355	1.91054	0.451596	0.203939	0.21046	5.71042	5.73849	6.99254	0.0590384	0.0334996	0.0519881	0.0167384	0.608812	2.98588	0.567421	0.321966	0.161911	5.3302	5.37852	7.06362	0.0627637	0.0451929	0.0435654	0.0225874	0.995414	3.04999	0.720049	0.518471	0.184667	6.14466	6.21664	8.06212	0.0559747	0.0528499	0.0296268	0.0264112	1.56265	3.39492	0.944173
6	4	1	1	7.18275	7.22206	8.318	0.0537258	0.0404702	0.0356717	0.0202408	1.2819	2.47392	0.753273	0.56742	0.134945	7.73739	7.76756	8.62786	0.0561975	0.0384758	0.0410634	0.0192485	1.21945	2.56277	0.684653	0.468749	0.135452	7.13045	7.15442	8.31292	0.0616293	0.0361	0.0527319	0.0180931	0.807173	2.15496	0.58576	0.343115	0.172146	7.29119	7.31825	8.75243	0.0527251	0.0331836	0.0418993	0.0165966	0.920918	2.57849	0.629369
6	1	1	1	7.03668	7.06769	8.49323	0.0593707	0.0393036	0.0447967	0.0196321	0.815281	2.50607	0.662003	0.438249	0.175631	7.32259	7.33367	8.00714	0.07968	0.0321408	0.0987675	0.0160705	0.428378	1.98511	0.403374	0.16271	0.222787	6.40089	6.43278	7.81472	0.0442165	0.0283187	0.0345184	0.0141588	0.964336	2.32362	0.640455	0.410183	0.117416	7.44115	7.46039	8.42673	0.072996	0.0391283	0.0680363	0.019549	0.753814	1.87837	0.536034
6	2	1	1	5.41046	5.43526	6.38722	0.0728737	0.0378388	0.070231	0.0189348	0.890432	1.89872	0.519238	0.269608	0.21878	5.34433	5.36633	6.75007	0.0571855	0.0277911	0.0588364	0.0138958	0.711287	2.29071	0.485981	0.236178	0.136867	4.16093	4.21182	5.42581	0.0493049	0.0322167	0.0377607	0.0161221	0.919855	2.33777	0.653417	0.426954	0.130518	6.3494	6.37502	7.51899	0.0953344	0.0544953	0.0833905	0.0272481	0.755044	2.39958	0.571623
6	3	1	1	6.91725	6.93383	8.02931	0.0608629	0.0291982	0.0634073	0.014593	0.608265	1.75329	0.479737	0.230147	0.162026	5.22691	5.25941	6.17556	0.0593574	0.0346879	0.05075	0.0173318	0.966673	1.93031	0.584391	0.341513	0.152104	5.22735	5.26406	6.37798	0.0495902	0.0308064	0.0398693	0.0153861	1.04441	2.25931	0.62122	0.385914	0.135091	6.2154	6.25908	7.20781	0.0563772	0.0416579	0.0381397	0.020824	1.20331	2.72749	0.738913
6	4	1	1	7.31489	7.38666	8.7619	0.03797	0.0390413	0.0184552	0.0195113	1.70354	3.46596	1.02821	1.05723	0.0858445	7.97442	8.00497	9.35265	0.050733	0.0354842	0.0363778	0.0177961	0.596479	3.73639	0.699429	0.489201	0.114856	7.26406	7.29418	8.58066	0.0737311	0.0488801	0.0556789	0.0244711	1.11079	2.7476	0.662951	0.439504	0.203874	7.45098	7.46813	8.463	0.0850056	0.0430383	0.0838905	0.0215044	0.737899	2.10745	0.506299
6	1	1	1	7.57431	7.59407	8.62627	0.0536673	0.0294143	0.0489996	0.0147194	0.611097	2.16026	0.548087	0.300399	0.125682	8.00582	8.02961	8.97568	0.0529457	0.0327398	0.0429187	0.0164111	0.615296	2.82204	0.618366	0.382376	0.113793	7.0807	7.11025	8.41331	0.0509389	0.0330225	0.039258	0.0164987	0.920799	2.39085	0.648277	0.420263	0.125003	7.73195	7.75144	8.98678	0.0439668	0.024181	0.0400006	0.0120995	0.510006	1.99749	0.549984
6	2	1	1	5.55695	5.57017	6.03775	0.0607626	0.0233314	0.079252	0.0116847	0.517026	1.79627	0.383976	0.147437	0.148204	5.84594	5.874	7.27491	0.069382	0.0398248	0.0604941	0.0199309	0.844297	2.76313	0.573993	0.329468	0.192813	4.12282	4.17071	5.33001	0.0818473	0.0516315	0.0649913	0.0258628	0.877617	2.81466	0.630826	0.397942	0.235861	5.67697	5.72588	7.61124	0.0614625	0.0459443	0.0411288	0.022982	0.944371	3.1644	0.747517
6	3	1	1	6.33272	6.36049	7.2848	0.0707596	0.0420506	0.0596726	0.0210741	0.779213	2.31727	0.594274	0.353162	0.19319	5.08375	5.13401	6.31898	0.0634989	0.0455535	0.0442678	0.0227824	1.29395	2.53318	0.71739	0.514648	0.167582	4.59876	4.66075	6.38834	0.0537652	0.0407799	0.0354897	0.020417	0.893107	3.20144	0.758482	0.575295	0.132206	6.01189	6.0423	7.37049	0.057628	0.0349282	0.0475263	0.017459	0.897613	2.39372	0.606098
6	4	1	1	7.14794	7.24294	9.74323	0.0594344	0.0695849	0.0253694	0.0347748	1.55007	4.67339	1.17079	1.37074	0.147804	7.55312	7.61212	8.75317	0.0481115	0.0455696	0.0254925	0.02287	1.21059	4.06596	0.947168	0.897127	0.0991567	6.8304	6.84788	7.90493	0.0606169	0.0296785	0.0619795	0.0148575	0.627634	1.84057	0.489608	0.239716	0.163969	7.6026	7.63478	8.73056	0.0663847	0.0465509	0.0472679	0.0232427	1.3882	2.19942	0.701229
6	1	1	1	8.11575	8.14272	9.23303	0.0441359	0.0292612	0.0333505	0.0146589	0.826702	2.55857	0.662979	0.439541	0.108795	7.86824	7.89005	9.02955	0.0728023	0.0427233	0.0620336	0.0213632	0.929092	2.23868	0.58684	0.344381	0.224625	6.99382	7.01056	8.06746	0.0753025	0.0364974	0.07776	0.0182667	0.626848	2.1047	0.484677	0.234912	0.238148	7.09494	7.13116	8.94633	0.0407235	0.0292673	0.0283684	0.0146524	0.513586	2.71046	0.718682
6	2	1	1	5.42875	5.43742	5.95141	0.0748623	0.0230119	0.121705	0.0114997	0.481729	1.22644	0.30739	0.0944887	0.227636	5.70662	5.73063	6.80466	0.0450881	0.0236519	0.0430929	0.0118581	0.535187	2.1032	0.524571	0.275175	0.10975	4.07367	4.11973	5.23197	0.0500928	0.0308066	0.0407534	0.0154134	0.823304	2.29771	0.61499	0.378212	0.123897	5.68827	5.72776	6.99726	0.0572141	0.038452	0.0425211	0.019206	0.828194	2.94845	0.672073
6	3	1	1	6.20741	6.21966	7.19901	0.0472518	0.0184569	0.0606934	0.00926024	0.440036	1.55676	0.390607	0.152574	0.117797	4.75532	4.78757	5.73654	0.0694858	0.0385926	0.062682	0.0193356	0.902515	2.00607	0.555402	0.308472	0.200821	4.36411	4.40815	5.79052	0.0577524	0.0359349	0.0465737	0.0180315	0.880653	2.47485	0.622223	0.387161	0.173304	5.52609	5.54325	6.27959	0.0652448	0.0284712	0.0747675	0.0142375	0.723181	1.57185	0.436375
6	4	1	1	7.58683	7.6502	9.10087	0.0617971	0.0607943	0.0314017	0.0303907	1.82658	3.36594	0.983772	0.967807	0.175692	7.8558	7.93077	8.93714	0.0445301	0.0484987	0.0204471	0.0242541	0.785752	4.21285	1.08912	1.18619	0.116584	7.11045	7.15233	8.85404	0.0650124	0.0502974	0.042	0.025139	1.13598	3.4901	0.773658	0.598547	0.20613	7.28675	7.31479	8.45895	0.0427646	0.0273908	0.0334252	0.0137125	0.941385	2.47541	0.640503
7	1	1	1	7.6732	7.69293	8.61223	0.0304978	0.0168117	0.0276991	0.00841691	0.93395	2.23171	0.551243	0.303869	0.0465697	6.90032	6.94117	9.02875	0.0467989	0.0352273	0.0310831	0.0176121	0.500584	3.03366	0.752737	0.566613	0.122701	6.81104	6.83339	7.61139	0.0540794	0.0298966	0.0488855	0.0149403	0.817895	2.06707	0.552827	0.305618	0.145282	6.2662	6.27203	6.69084	0.0630459	0.0170625	0.116463	0.00853016	0.462503	0.922564	0.270636
7	2	1	1	6.13594	6.17057	7.28596	0.0877121	0.0573304	0.0671786	0.0287	1.00335	2.41211	0.65362	0.427219	0.279091	6.58038	6.6036	7.82155	0.0567319	0.0314324	0.0512022	0.0157177	0.661808	2.14122	0.554052	0.306974	0.147264	6.68741	6.70276	7.52237	0.0558384	0.0253422	0.0617126	0.0127114	0.644451	1.6328	0.453848	0.205978	0.153118	3.97846	3.99502	4.70859	0.0567937	0.0206619	0.0781791	0.0103474	0.399474	1.3985	0.363807
7	3	1	1	6.52601	6.59819	7.81652	0.0568566	0.0554153	0.0293487	0.0278796	0.844612	3.88638	0.974651	0.949944	0.132151	4.88603	5.09735	6.96573	0.0543842	0.0791048	0.0187185	0.0396033	1.63991	5.14596	1.45456	2.11573	0.131807	6.65283	6.66655	7.41305	0.111565	0.0477729	0.130448	0.0239193	0.672904	1.5888	0.428208	0.183362	0.347584	6.45054	6.47255	7.69957	0.0614144	0.0327985	0.057502	0.0164003	0.446025	2.12686	0.534053
7	4	1	1	7.82695	7.84362	9.14122	0.066151	0.0338584	0.0646745	0.0169431	0.659385	2.01477	0.511835	0.261975	0.190638	6.62703	6.64862	7.52051	0.0560803	0.030069	0.0525498	0.0151074	0.660966	2.10151	0.536178	0.287487	0.15185	6.31617	6.31965	6.83432	0.089521	0.0187891	0.214065	0.00942994	0.357568	0.83077	0.209885	0.0440517	0.257206	6.80046	6.81473	7.46372	0.0525949	0.0232174	0.0594713	0.011589	0.70104	1.53628	0.441437
7	1	1	1	8.1037	8.1561	9.64292	0.0621942	0.0574587	0.0336684	0.0287365	1.35904	4.1773	0.923859	0.853515	0.14973	6.83146	6.85286	8.81212	0.0573117	0.0310487	0.0529248	0.0155332	0.587542	2.79085	0.541752	0.293495	0.123889	6.59583	6.63267	7.9087	0.0672319	0.0469748	0.0481429	0.0235023	0.952089	2.69893	0.698697	0.488178	0.174272	6.13977	6.15799	7.32276	0.0630345	0.029861	0.0664712	0.0149171	0.428492	2.35148	0.473724
7	2	1	1	6.40539	6.42947	7.42123	0.0372471	0.0207326	0.0337196	0.0104474	0.956856	1.78039	0.556625	0.309831	0.0889548	6.31834	6.33026	6.98246	0.0545858	0.0212179	0.0702998	0.0106218	0.341691	1.55451	0.388707	0.151093	0.155099	6.38122	6.40023	7.12306	0.0726889	0.035867	0.0735632	0.0179108	0.66648	1.86357	0.493431	0.243474	0.210917	4.9161	4.96546	6.11689	0.0651817	0.0455769	0.0465554	0.0227618	0.974279	2.65573	0.699227
7	3	1	1	5.9146	5.94626	7.30536	0.0698396	0.0428475	0.0569155	0.0214229	0.98478	2.32434	0.613513	0.376399	0.210274	5.25064	5.27294	6.30287	0.0562222	0.0272628	0.0583161	0.0137124	0.562354	1.78323	0.484912	0.23514	0.149572	6.51174	6.52636	7.29845	0.0844681	0.0369094	0.0968714	0.0184963	0.568568	1.71645	0.436962	0.190936	0.257159	6.2733	6.28167	7.09593	0.0593449	0.0192617	0.0913678	0.00962534	0.396337	1.36079	0.324572
7	4	1	1	8.01443	8.03873	9.51438	0.0571057	0.0356884	0.0457639	0.0178738	0.737649	2.68626	0.624953	0.390566	0.160297	6.65733	6.67786	8.12783	0.0519985	0.027225	0.0497872	0.013648	0.666518	2.50546	0.523572	0.274128	0.151521	6.66839	6.69736	7.96683	0.0381873	0.0237737	0.0306687	0.0118864	1.05087	2.19163	0.622556	0.387576	0.0920362	6.68742	6.7099	7.82903	0.0542658	0.0297962	0.0494242	0.0149008	0.90515	1.98409	0.549079
7	1	1	1	7.43513	7.46031	8.73642	0.0512657	0.0314268	0.0419722	0.0157728	0.785186	2.37396	0.613018	0.375791	0.124441	7.7314	7.77003	8.96519	0.0408194	0.0316212	0.0263329	0.0158024	1.3849	2.61391	0.774662	0.600102	0.0996512	6.59114	6.60783	7.34488	0.065335	0.0306972	0.0694518	0.0153317	0.670658	1.75975	0.469843	0.220753	0.183825	6.31732	6.32617	7.08242	0.0729953	0.024444	0.109059	0.0122297	0.526092	1.41706	0.33487
7	2	1	1	6.2222	6.26981	7.89508	0.0771659	0.0595788	0.0500354	0.029827	1.37152	2.68736	0.772087	0.596118	0.22412	6.0052	6.03586	6.71076	0.0507053	0.0308455	0.0418991	0.0155053	0.42417	2.58523	0.608329	0.370064	0.115472	6.10586	6.11916	6.96519	0.0717191	0.0289613	0.089121	0.0145327	0.489515	1.84861	0.403816	0.163067	0.203455	4.33432	4.3784	5.51376	0.0662203	0.0410875	0.0534597	0.0205809	0.816611	2.40922	0.620467
7	3	1	1	5.9134	5.94892	7.05211	0.0664656	0.0431953	0.0513577	0.0216912	0.728747	2.82899	0.649889	0.422356	0.163068	5.72451	5.75399	6.4781	0.0512765	0.0298655	0.0440861	0.0149556	1.1477	1.68393	0.582441	0.339237	0.131458	6.68426	6.70899	7.59698	0.0412886	0.023789	0.0357824	0.0118785	1.15795	1.85718	0.576164	0.331965	0.105206	5.93619	5.95225	6.61988	0.0751058	0.0328554	0.0857711	0.0164137	0.565877	1.89366	0.437455
7	4	1	1	8.14204	8.17525	9.2106	0.0602055	0.0443669	0.0409096	0.0222163	0.981618	3.0506	0.736925	0.543058	0.166313	6.44635	6.45194	6.88748	0.0588463	0.0158243	0.109961	0.00795154	0.382099	1.37529	0.26891	0.0723123	0.12672	6.34308	6.35582	7.07531	0.05692	0.0229153	0.0706076	0.0114438	0.690491	1.30632	0.402587	0.162076	0.164841	6.63789	6.64316	7.13623	0.0761448	0.0201652	0.143922	0.0100937	0.341165	1.04363	0.264827
7	1	1	1	7.42913	7.44063	8.10293	0.0700471	0.0289927	0.0850944	0.014578	0.493892	1.74012	0.413903	0.171316	0.214662	6.88146	6.89789	7.79734	0.0619442	0.0295002	0.065014	0.0147453	0.853255	1.84282	0.476238	0.226803	0.192276	6.80198	6.82348	7.85569	0.0469709	0.0254521	0.043362	0.0127321	0.718134	2.0118	0.54187	0.293623	0.128661	6.31152	6.32292	7.01791	0.0697938	0.0265095	0.091749	0.0132364	0.55023	1.4921	0.379826
7	2	1	1	5.71398	5.80456	7.46168	0.0408065	0.041724	0.0199933	0.0209024	1.71138	3.56194	1.02248	1.04547	0.0914458	5.96238	5.98972	6.88748	0.057831	0.0330974	0.0505139	0.0165454	0.909451	2.11715	0.572313	0.327542	0.168117	6.32884	6.37562	7.49058	0.0702717	0.0542347	0.0455536	0.0271342	1.07233	2.78243	0.771786	0.595653	0.206643	4.36216	4.45293	6.16461	0.0454252	0.0406774	0.0254057	0.0203725	1.57019	2.89649	0.895481
7	3	1	1	5.52277	5.57563	7.13962	0.0758185	0.0581396	0.049465	0.0290865	1.23338	2.84081	0.766826	0.588022	0.22261	5.06696	5.10633	6.16009	0.0628911	0.0398412	0.0496734	0.0199347	0.876192	2.62738	0.633495	0.401316	0.186359	6.54877	6.56369	7.42434	0.0661801	0.0293051	0.0747622	0.0146593	0.544434	1.7416	0.442808	0.196079	0.190366	6.09106	6.12385	7.4169	0.0624889	0.0395913	0.0493532	0.0198111	1.00573	2.32952	0.633573
7	4	1	1	8.8273	8.87082	10.714	0.0544274	0.0478264	0.0309876	0.023927	0.999317	3.29213	0.878719	0.772147	0.145935	6.48356	6.48862	7.27601	0.0635416	0.0163083	0.123825	0.00815657	0.272811	1.12677	0.256655	0.0658718	0.180519	6.59227	6.59824	6.96216	0.0431038	0.0121136	0.0769303	0.00607588	0.438121	0.904917	0.281032	0.078979	0.0976972	6.33924	6.34522	6.82249	0.0502276	0.0138417	0.0913757	0.00693947	0.519235	0.872582	0.27558
7	1	1	1	7.31147	7.3345	8.75709	0.060236	0.0350167	0.0518299	0.0175154	0.813171	2.26172	0.581325	0.337939	0.16135	7.28368	7.30209	8.29061	0.0697128	0.0361679	0.0672216	0.0180938	0.873186	1.85753	0.518812	0.269166	0.185107	6.5069	6.5175	7.36476	0.0736507	0.0274062	0.0989068	0.0136952	0.57946	1.26639	0.37211	0.138466	0.212821	6.24019	6.25741	7.08269	0.0565662	0.0262686	0.0609939	0.0131536	0.613018	1.69328	0.464386
7	2	1	1	5.5461	5.59304	7.28898	0.0509096	0.0368474	0.0352003	0.01844	0.73695	2.95775	0.723781	0.523859	0.12243	5.51344	5.53048	6.4197	0.0581521	0.0252555	0.0670466	0.0126461	0.633535	1.50204	0.4343	0.188617	0.15389	6.51056	6.55414	7.73377	0.0648258	0.0489654	0.0429256	0.0244906	1.05991	2.82944	0.755338	0.570536	0.181036	4.15716	4.20693	4.97391	0.0653097	0.0421785	0.0506437	0.0211228	0.701702	2.52286	0.645822
7	3	1	1	5.64106	5.66829	7.30924	0.0529044	0.0293877	0.047601	0.014688	0.756618	2.68519	0.555487	0.308566	0.124205	5.00376	5.0624	6.67961	0.0444622	0.0341909	0.0289642	0.0171277	0.910653	3.17278	0.768988	0.591342	0.113432	6.33951	6.36794	8.30642	0.0574126	0.0345396	0.0478516	0.0173188	0.532458	3.05956	0.601604	0.361927	0.155839	6.32679	6.36058	7.722	0.065859	0.0431637	0.0503097	0.0216102	0.858269	2.58067	0.655395
7	4	1	1	8.00522	8.04503	9.46189	0.0599017	0.0479277	0.0374132	0.0239508	1.2975	2.85931	0.800106	0.64017	0.16053	6.7942	6.80501	7.61406	0.0726752	0.027893	0.0948361	0.0139699	0.569326	1.49	0.383804	0.147306	0.206496	6.52303	6.5638	8.18839	0.063762	0.0466204	0.0436051	0.0233112	0.621859	3.49068	0.731163	0.534599	0.180349	6.5922	6.60038	7.36915	0.0611539	0.020113	0.0929164	0.0100508	0.436808	1.25412	0.328892
8	1	1	1	7.0976	7.11826	8.15117	0.0901337	0.0488978	0.0832641	0.0245054	0.723331	2.09671	0.542503	0.294309	0.282558	7.7034	7.71301	8.42924	0.0752132	0.0289816	0.0978474	0.014528	0.483515	1.58781	0.385327	0.148477	0.241563	6.90966	6.93585	8.07663	0.0569447	0.0343259	0.0472374	0.0171642	0.840267	2.24968	0.602794	0.363361	0.160665	6.80605	6.82994	7.91094	0.0703757	0.0402065	0.0616803	0.0201323	0.838049	2.46828	0.571312
8	2	1	1	6.27209	6.35496	8.51886	0.0645233	0.0660509	0.0315126	0.0330224	1.71452	4.28667	1.02368	1.04791	0.191468	7.15947	7.20824	8.43213	0.0444097	0.0372028	0.0265056	0.0186009	1.40393	3.30766	0.837719	0.701773	0.115567	6.43894	6.48055	7.8539	0.0566811	0.0415889	0.038645	0.0208051	0.758404	3.36885	0.733734	0.538366	0.163686	5.31757	5.40823	7.27403	0.0628978	0.0620667	0.0318736	0.0310369	1.61416	3.87744	0.986787
8	3	1	1	5.11757	5.17556	6.8979	0.0631304	0.04883	0.0408038	0.0244117	1.01437	3.16302	0.773478	0.598269	0.187356	4.67934	4.69193	5.3022	0.0870803	0.02995	0.126735	0.0149917	0.44316	1.37633	0.343935	0.118292	0.272651	5.84506	5.86623	6.63381	0.0713749	0.0355772	0.0717765	0.0178334	0.892252	1.64582	0.498455	0.248458	0.189122	5.89969	5.92524	6.70912	0.0506965	0.0278953	0.0460007	0.0139274	0.690649	2.02103	0.55024
8	4	1	1	7.06003	7.1195	9.04287	0.0783948	0.0720925	0.0426524	0.0360702	1.30311	3.70226	0.919607	0.845677	0.201827	6.52718	6.55283	7.94547	0.063257	0.0366894	0.0545702	0.0183577	0.885436	2.16687	0.580005	0.336405	0.182846	5.96157	5.96967	6.63484	0.0939105	0.0292327	0.151049	0.0146361	0.413769	1.26408	0.311282	0.0968966	0.287553	5.91735	5.95093	6.9451	0.0650011	0.0410928	0.0514087	0.020546	0.653801	2.53563	0.632186
8	1	1	1	6.69417	6.71144	7.50645	0.0627988	0.0302645	0.0650696	0.0151127	0.477312	1.93299	0.481928	0.232254	0.170807	7.30171	7.32772	8.72967	0.0894476	0.0552609	0.0723505	0.0276147	0.681526	2.63707	0.617802	0.38168	0.271895	6.24814	6.30871	7.6922	0.0472733	0.0412936	0.0271339	0.0207035	1.61193	2.63365	0.873506	0.763014	0.100619	6.57547	6.60126	7.4239	0.0592177	0.0345747	0.0507697	0.0173069	1.1335	1.82247	0.583858
8	2	1	1	5.13672	5.178	6.47897	0.0720419	0.0470451	0.055137	0.0235127	0.996111	2.70807	0.653024	0.426441	0.225426	6.84437	6.86016	7.80318	0.067053	0.0312201	0.0719363	0.0155948	0.571594	1.9953	0.465604	0.216787	0.195853	5.06774	5.15492	6.91546	0.0651893	0.0615927	0.0345112	0.0308082	1.48587	3.75548	0.944829	0.892702	0.185773	5.51481	5.53539	6.46133	0.0881679	0.0420823	0.0924206	0.0210546	0.772102	2.30523	0.477297
8	3	1	1	5.53065	5.58379	7.29398	0.0547019	0.0420781	0.0356302	0.0210826	1.28603	2.79188	0.769225	0.591707	0.144102	4.18622	4.2045	4.90346	0.0660482	0.0258934	0.0841739	0.012937	0.403025	1.83884	0.392038	0.153694	0.200142	5.42826	5.47309	6.76264	0.0669361	0.0468401	0.0479553	0.0234829	0.962123	2.81932	0.699773	0.489682	0.215451	6.11216	6.14636	7.73957	0.0692674	0.0448968	0.0534619	0.0224604	0.741858	2.80497	0.648167
8	4	1	1	6.00016	6.04612	7.19364	0.0633376	0.0472133	0.0423715	0.0235439	1.2167	2.42866	0.745423	0.555655	0.151006	6.92571	6.94518	7.70637	0.0724532	0.0377133	0.0694832	0.0188258	0.939168	1.67489	0.520519	0.27094	0.198186	6.03159	6.06566	7.58401	0.0497388	0.0319862	0.0388162	0.0160527	0.409752	2.40393	0.643085	0.413558	0.0929728	6.42313	6.4419	7.16206	0.0629985	0.0310134	0.0638171	0.015466	0.642755	1.73944	0.492289
8	1	1	1	6.91172	6.95252	8.75379	0.0598394	0.0450665	0.0398113	0.0225808	0.78639	3.04927	0.753123	0.567195	0.161651	7.43882	7.45844	8.65031	0.0577245	0.0312508	0.0533088	0.0156243	0.655404	2.18325	0.541379	0.293091	0.148313	6.13991	6.15324	6.83876	0.0401499	0.0162749	0.0495274	0.00813792	0.733139	1.39466	0.405354	0.164312	0.0932889	6.49429	6.5231	7.45197	0.0638771	0.0391706	0.052089	0.0195873	1.1226	1.95389	0.613218
8	2	1	1	4.84871	4.91353	6.24633	0.048554	0.0386638	0.030507	0.0193445	1.14201	2.81387	0.796305	0.634102	0.112902	6.07279	6.09336	7.00835	0.0632593	0.0316771	0.0630931	0.0158206	0.779936	1.74555	0.50075	0.250751	0.174136	4.49944	4.57854	6.07103	0.0538182	0.045653	0.031701	0.0228116	1.45998	2.86203	0.848283	0.719584	0.15077	5.96695	6.00617	7.49315	0.0698294	0.0479064	0.0509048	0.0239591	0.90808	2.59071	0.68605
8	3	1	1	5.25918	5.32081	7.02132	0.0755423	0.0610789	0.046664	0.030506	0.679932	3.8128	0.80854	0.653737	0.207757	5.0193	5.08212	6.40653	0.0779585	0.0621798	0.0488769	0.0310938	1.15993	2.92473	0.7976	0.636167	0.229081	5.49632	5.54394	7.25193	0.0673977	0.0489299	0.0464959	0.024506	1.1012	2.70597	0.725987	0.527057	0.18798	5.77788	5.85848	7.27315	0.0779925	0.075629	0.0402028	0.0378032	1.80887	3.2243	0.969697
8	4	1	1	6.69356	6.786	8.85652	0.0460403	0.0514603	0.0205912	0.0257246	1.09451	4.33661	1.11772	1.2493	0.0956614	7.61683	7.633	8.42117	0.0653092	0.0324763	0.0658601	0.0162857	0.652471	2.31675	0.49727	0.247278	0.188488	6.88698	6.93228	8.39841	0.0588117	0.0465947	0.0372244	0.0233654	1.43169	2.92799	0.792269	0.627689	0.17392	6.77685	6.80353	7.46985	0.0522719	0.0315061	0.0433298	0.0157413	0.830551	2.71766	0.602735
8	1	1	1	6.02689	6.04661	6.94354	0.0580632	0.0283643	0.0595118	0.0142018	0.788843	1.71545	0.488507	0.238639	0.181795	7.46898	7.50479	8.7326	0.0591523	0.0433578	0.0403919	0.0217013	1.13125	2.79109	0.732986	0.537269	0.152294	6.08703	6.10938	7.02218	0.0634111	0.0331451	0.0606161	0.0165613	0.666911	2.02803	0.522702	0.273217	0.179013	6.30193	6.3173	6.9304	0.0595516	0.0262568	0.0677032	0.0131615	0.597087	1.8056	0.440908
8	2	1	1	4.88038	4.92284	5.93375	0.0699251	0.0451418	0.054218	0.0225962	0.937216	2.35501	0.645575	0.416766	0.212285	6.15422	6.17893	7.26582	0.0462699	0.025559	0.0418887	0.0127816	0.899712	2.09001	0.552389	0.305133	0.121648	4.38458	4.44322	5.85062	0.0376657	0.0271184	0.0262138	0.0135883	1.00762	3.06946	0.719976	0.518365	0.0825351	5.55993	5.61882	7.30984	0.073775	0.0598974	0.0454507	0.0299598	1.22693	3.31656	0.811894
8	3	1	1	5.09675	5.12269	6.49667	0.0550736	0.0283797	0.0533736	0.0141727	0.621224	2.24978	0.515304	0.265538	0.163322	4.37704	4.39918	5.11099	0.0720338	0.0317761	0.0817254	0.0159032	0.719145	1.75501	0.441127	0.194593	0.224598	5.8553	5.91776	7.70497	0.0641804	0.0550869	0.0373812	0.0275388	1.19215	3.51856	0.858314	0.736703	0.192312	5.75416	5.79658	6.84509	0.0441504	0.0309345	0.0315196	0.0154738	0.982413	2.62463	0.700662
8	4	1	1	6.85853	6.93032	8.82601	0.0524947	0.0522896	0.0263405	0.0261351	1.82643	3.90306	0.996093	0.992202	0.145516	6.43091	6.45855	7.42475	0.0513159	0.0306662	0.0430555	0.0153761	1.05508	2.13003	0.597597	0.357122	0.130711	6.32088	6.33619	6.82546	0.0557126	0.0245517	0.0632273	0.012279	0.689635	1.49685	0.440685	0.194204	0.141893	6.3027	6.3198	7.18689	0.0882735	0.0410498	0.0951433	0.020575	0.724929	2.11626	0.465029
8	1	1	1	7.1761	7.18616	7.88797	0.0834181	0.0317598	0.109728	0.0159057	0.707131	1.34478	0.38073	0.144955	0.252103	8.00048	8.0427	9.07752	0.0596423	0.0491469	0.036172	0.0245615	1.58719	2.51887	0.824028	0.679021	0.140637	6.75668	6.78585	8.09856	0.0826796	0.0520319	0.0656597	0.0260041	0.893469	2.33542	0.62932	0.396043	0.240234	7.18856	7.19824	8.44508	0.0874798	0.0326789	0.117	0.016327	0.473896	1.91744	0.37356
8	2	1	1	4.97843	4.99473	5.8007	0.0611938	0.0246961	0.0758842	0.0123593	0.524331	1.58351	0.403572	0.16287	0.167033	6.40545	6.42417	7.19328	0.0644494	0.0316188	0.0658436	0.0158477	0.782764	2.43106	0.490598	0.240686	0.174111	4.84854	4.88275	5.70019	0.0413275	0.0238677	0.0357948	0.0119389	0.887425	2.20833	0.577526	0.333536	0.0982782	4.96537	5.00891	6.10424	0.0711135	0.0469133	0.0539	0.0234573	0.887783	2.80334	0.659696
8	3	1	1	4.98603	5.0058	5.67005	0.0791685	0.0352309	0.0889241	0.0176101	0.498209	1.88341	0.445012	0.198035	0.231465	4.90988	4.99856	6.51309	0.0488584	0.0458611	0.0260156	0.0229215	1.40531	3.34794	0.938653	0.881069	0.129805	6.31993	6.38911	8.18319	0.0609562	0.0572364	0.0325776	0.0287229	1.57881	3.50408	0.938976	0.881676	0.153603	5.73457	5.75247	6.6893	0.084905	0.0385438	0.0934224	0.0192528	0.658333	1.7723	0.453964
8	4	1	1	6.22063	6.28064	8.31121	0.0432542	0.0375087	0.024969	0.0187763	1.27254	3.25566	0.86717	0.751983	0.0929295	7.66552	7.68564	8.68977	0.0463124	0.0257659	0.0416702	0.012898	0.980077	1.88046	0.556351	0.309526	0.0983781	6.64375	6.68264	7.99474	0.0621413	0.0447895	0.0430843	0.0223827	0.886321	2.79636	0.72077	0.519509	0.179154	6.83954	6.88488	8.17013	0.0516993	0.0408288	0.032683	0.0203839	1.18257	2.9534	0.789736
9	1	1	1	8.95213	8.95813	9.87264	0.068972	0.0226545	0.10501	0.011329	0.475911	1.43898	0.32846	0.107886	0.115696	7.9886	7.99369	8.53545	0.0824399	0.0235511	0.144266	0.0117737	0.456716	1.25252	0.285676	0.081611	0.176794	7.77558	7.80486	8.91926	0.0386712	0.0261786	0.0286213	0.0131162	1.28076	1.89883	0.676954	0.458267	0.0603485	9.73566	9.7595	10.5372	0.0583316	0.0398546	0.0426898	0.0199285	0.850796	2.54827	0.683242
9	2	1	1	5.23377	5.25409	6.07529	0.0548539	0.0253521	0.0594201	0.0126925	0.674933	1.70768	0.462175	0.213606	0.13772	6.08811	6.11662	7.16411	0.0645455	0.0381175	0.0546302	0.0190524	1.00788	2.09398	0.590552	0.348752	0.182108	4.38941	4.41675	5.48946	0.0558351	0.0274299	0.0569432	0.0137429	0.534942	1.92747	0.491267	0.241343	0.143352	4.60235	4.62305	5.43472	0.0779882	0.034122	0.0892987	0.0170945	0.760626	1.57199	0.437528
9	3	1	1	5.77609	5.78793	6.42499	0.0471179	0.0174563	0.0635404	0.00872134	0.487497	1.39585	0.370482	0.137257	0.110363	4.93691	4.97089	6.2482	0.0502853	0.0292086	0.0433593	0.0146293	1.06954	2.07129	0.580859	0.337397	0.121006	4.96321	4.99485	6.38794	0.072657	0.0408268	0.0646862	0.0204244	0.620368	2.54066	0.561912	0.315745	0.222611	5.79881	5.81759	6.69569	0.0572984	0.0267902	0.0616088	0.0134682	0.819096	1.54996	0.467556
9	4	1	1	8.30255	8.35899	9.71246	0.0473152	0.0459533	0.0243071	0.0229279	1.85456	3.07569	0.971217	0.943262	0.106704	7.24876	7.27352	8.42437	0.0413546	0.0248384	0.0345314	0.0124571	1.09295	2.22053	0.600622	0.360746	0.0736728	6.85625	6.87238	7.85256	0.0377592	0.017793	0.0401075	0.00890597	0.690891	1.50029	0.471224	0.222052	0.070181	7.83308	7.90023	9.88511	0.0474022	0.0487946	0.0229774	0.0243471	1.18138	3.68193	1.02937
9	1	1	1	8.43593	8.46226	10.0706	0.0465897	0.03112	0.0350198	0.0156247	0.781713	2.33009	0.667959	0.446169	0.120643	7.982	7.99871	8.86599	0.0435221	0.0225245	0.0420808	0.0112713	0.842787	2.00342	0.517542	0.26785	0.0825444	7.37876	7.43124	8.79963	0.052183	0.0460725	0.0294917	0.0229892	1.70852	2.66866	0.882902	0.779516	0.102263	9.47271	9.49788	10.7686	0.059347	0.0410731	0.0428087	0.0205045	1.07449	2.33624	0.692084
9	2	1	1	4.95461	4.9769	6.17958	0.0711109	0.0334889	0.075489	0.0167422	0.484478	2.47016	0.470939	0.221784	0.210212	6.20347	6.21952	7.38779	0.0432105	0.0193099	0.0483697	0.0096595	0.726504	1.87077	0.446879	0.199701	0.0848069	4.44594	4.63577	8.36108	0.0484654	0.0636963	0.0184452	0.0318602	1.0127	5.20407	1.31426	1.72729	0.129155	4.5494	4.59845	5.83358	0.0649051	0.0435185	0.048348	0.0217354	1.12052	2.39752	0.670494
9	3	1	1	5.84345	5.89233	7.36971	0.0785935	0.0595995	0.0518512	0.0298175	1.27004	2.84173	0.758327	0.575059	0.228724	5.33894	5.39062	7.16622	0.0524748	0.0391243	0.0352257	0.0195817	0.741556	3.36815	0.745582	0.555892	0.121623	5.1272	5.14031	5.71232	0.0761239	0.0279606	0.103994	0.01403	0.674934	1.44211	0.367303	0.134912	0.209193	6.18388	6.21195	7.57249	0.0318392	0.0188043	0.0269743	0.00940895	0.800576	2.32471	0.590602
9	4	1	1	7.99826	8.00513	8.54047	0.0662831	0.0220029	0.0997587	0.0109927	0.476457	1.28501	0.331953	0.110193	0.193149	8.10454	8.11405	8.92105	0.0556967	0.0219009	0.0707658	0.0109417	0.521887	1.50355	0.393216	0.154619	0.138051	7.70982	7.72664	8.56399	0.0640919	0.0326939	0.0629463	0.0163794	0.754728	2.2792	0.51011	0.260212	0.159247	6.84694	6.85033	7.23178	0.0556044	0.0120016	0.128759	0.0059984	0.32842	0.791276	0.215839
9	1	1	1	8.74317	8.75288	9.51655	0.0817376	0.0337408	0.0991451	0.0168942	0.747365	1.40019	0.412794	0.170399	0.234187	7.02869	7.06254	8.63862	0.0452906	0.0313139	0.0327199	0.0156412	0.845931	2.42498	0.6914	0.478033	0.111434	6.89589	6.90428	7.53598	0.064268	0.0218903	0.0945522	0.0109695	0.602017	1.21076	0.34061	0.116015	0.176092	8.29136	8.3312	9.83999	0.0537122	0.0437612	0.0329196	0.0218518	1.2678	2.83651	0.814735
9	2	1	1	5.10385	5.12452	5.6662	0.0437025	0.0201129	0.0476038	0.0100827	0.779067	1.48425	0.460222	0.211805	0.110864	6.1954	6.22145	7.3054	0.0703026	0.040029	0.0616927	0.0200005	0.760067	2.42487	0.569381	0.324195	0.194856	4.21097	4.32393	5.83949	0.0543649	0.053437	0.0276703	0.0267339	1.5293	3.66901	0.982933	0.966157	0.138952	4.74047	4.79134	5.9239	0.069921	0.0487373	0.0502765	0.0244271	1.24321	2.34234	0.697033
9	3	1	1	5.83109	5.87125	7.09572	0.0351417	0.0241118	0.0256264	0.0120643	1.22743	2.03512	0.686132	0.470777	0.0890836	5.06121	5.15243	7.16071	0.0380983	0.0368089	0.0197316	0.0184186	1.62202	3.4056	0.966156	0.933457	0.0911312	5.11918	5.14254	6.08798	0.0587372	0.0287809	0.0599006	0.0143818	0.726471	2.29548	0.489994	0.240094	0.145037	5.27974	5.29151	5.80765	0.0433679	0.0153122	0.0615491	0.00767287	0.555596	1.25902	0.353076
9	4	1	1	7.55923	7.62987	8.7538	0.038523	0.0399549	0.0185554	0.0199605	1.13312	3.84234	1.03717	1.07572	0.0703537	8.18803	8.21	9.03985	0.0737204	0.0443087	0.0614843	0.022211	1.06454	2.3515	0.601038	0.361246	0.191748	7.33978	7.38332	8.57	0.0336717	0.0269943	0.0209594	0.0134709	1.244	2.71624	0.801693	0.642712	0.0618086	8.06027	8.08091	9.02794	0.0752722	0.0435073	0.0651874	0.021778	0.828611	2.06214	0.577999
9	1	1	1	8.80735	8.82585	9.85115	0.0517793	0.0296154	0.0452841	0.0148139	0.85416	2.4815	0.571954	0.327132	0.112528	6.33641	6.34466	6.97433	0.0623414	0.0201955	0.0962881	0.0101048	0.550379	1.26081	0.32395	0.104944	0.194658	6.70999	6.72032	7.36098	0.0631471	0.023556	0.0848558	0.011808	0.613743	1.46492	0.373033	0.139154	0.169219	8.13199	8.15514	8.86011	0.023097	0.0142013	0.0187744	0.00709757	1.27034	1.76279	0.614854
9	2	1	1	5.37361	5.39463	6.42417	0.0710899	0.0338619	0.074612	0.0169284	0.645933	1.8212	0.476325	0.226885	0.204242	5.49409	5.54879	7.36372	0.0787972	0.0613021	0.050611	0.0306319	1.08216	3.17349	0.777973	0.605241	0.221973	4.09321	4.14521	5.07539	0.038674	0.0253383	0.029474	0.0126519	1.33124	2.09602	0.655178	0.429258	0.0880534	4.48356	4.56888	5.56432	0.04981	0.0438195	0.0283264	0.0219226	1.03623	3.40194	0.879732
9	3	1	1	5.72897	5.75171	7.03505	0.0584871	0.0299149	0.0572118	0.0149672	0.728775	1.94994	0.511478	0.26161	0.17162	4.9866	5.00101	6.04093	0.0462704	0.0175746	0.0609419	0.00879189	0.533887	1.71241	0.379825	0.144267	0.0955597	5.26715	5.28045	5.72856	0.0401355	0.015052	0.0535016	0.00752488	0.671667	1.25517	0.37503	0.140648	0.0926565	5.04887	5.08816	6.65798	0.0439396	0.0277634	0.0348094	0.0138973	0.599956	2.52427	0.631854
9	4	1	1	7.43063	7.45237	7.99986	0.0348052	0.0198237	0.0305327	0.0099048	0.246506	1.95552	0.569561	0.3244	0.0698833	7.30787	7.34963	8.37772	0.045617	0.0357325	0.0292009	0.0179173	1.35144	2.69679	0.783317	0.613586	0.0999938	6.52244	6.5539	7.48942	0.0446962	0.0287038	0.0348103	0.0143564	1.33524	2.10738	0.642197	0.412418	0.116358	6.95211	6.96138	7.63622	0.0508883	0.018302	0.0709159	0.00917287	0.433917	1.45598	0.359651
9	1	1	1	8.31386	8.32504	8.99755	0.044636	0.0192706	0.051929	0.00967901	0.652042	1.68837	0.431728	0.186389	0.10693	6.2559	6.27511	7.22481	0.0351413	0.0172573	0.0358844	0.00865394	0.831479	1.7126	0.491082	0.241162	0.0747467	6.42854	6.43924	7.13516	0.0432694	0.0160707	0.0584772	0.00806668	0.352298	1.49375	0.371411	0.137946	0.106378	7.92436	7.9708	9.46003	0.0322915	0.0277717	0.0187683	0.0138821	1.53323	2.80364	0.860031
9	2	1	1	4.66342	4.68336	5.25666	0.051501	0.0222542	0.0596345	0.011135	0.76446	1.42569	0.432112	0.186721	0.122285	5.72342	5.76826	6.9047	0.048442	0.03481	0.0336726	0.0173877	1.09694	2.61198	0.718592	0.516375	0.124038	4.03207	4.0775	4.77964	0.0569656	0.0346151	0.0468454	0.0172971	0.819654	2.25191	0.607649	0.369237	0.165428	5.25479	5.28427	6.35654	0.0575321	0.0321014	0.0515887	0.0160614	0.857617	1.95071	0.557974
9	3	1	1	5.27338	5.29498	6.31375	0.0808205	0.0386545	0.0845146	0.0193325	0.656463	1.982	0.478275	0.228747	0.26526	4.81676	4.85351	6.09109	0.0660253	0.0393992	0.0552952	0.0196898	0.647478	2.47027	0.596729	0.356086	0.19336	4.91264	4.94371	5.80422	0.0485741	0.0269082	0.0439138	0.013476	0.519842	2.38085	0.553962	0.306874	0.125379	5.18386	5.20357	5.93927	0.0960464	0.0435029	0.10606	0.0217584	0.640419	1.91381	0.452936
9	4	1	1	7.76279	7.81066	8.78101	0.0279476	0.0241547	0.0161566	0.0120688	0.647866	2.94201	0.864286	0.74699	0.0513945	7.92852	7.98672	8.79596	0.0254441	0.0245152	0.0132142	0.012267	1.27154	3.47535	0.963493	0.928319	0.0329649	7.17131	7.20196	8.28347	0.0586704	0.0389864	0.0441982	0.0195161	0.791273	2.92528	0.664498	0.441558	0.143665	7.79228	7.80038	8.42633	0.0693709	0.0246728	0.0974783	0.0123308	0.55379	1.37359	0.355665
10	1	1	1	6.95897	7.00967	8.47571	0.0494996	0.0416716	0.029407	0.0208416	1.56095	3.07363	0.841859	0.708727	0.137333	7.3154	7.35271	9.32211	0.0555646	0.0411194	0.0375523	0.0205653	0.995544	3.8746	0.740029	0.547642	0.17183	7.31051	7.34248	8.80891	0.0531093	0.0363679	0.0387883	0.0181885	1.02417	3.07224	0.684775	0.468916	0.154929	7.61934	7.64899	8.93706	0.0426851	0.0287336	0.0317206	0.0143738	0.980802	3.32391	0.673154
10	2	1	1	5.64542	5.67138	6.58991	0.0421388	0.0228613	0.0389576	0.0114664	0.69708	2.1502	0.542523	0.294331	0.122371	7.20405	7.21738	8.1949	0.0445458	0.0195577	0.0508223	0.00979663	0.616719	1.46254	0.439047	0.192763	0.109072	5.12845	5.15946	6.2805	0.0737108	0.0416788	0.0651415	0.0208269	0.818798	2.28086	0.565437	0.319719	0.196844	6.16178	6.20997	7.74884	0.0440161	0.0340231	0.0284622	0.0170057	0.760445	2.99099	0.772969
10	3	1	1	6.13915	6.15125	6.80443	0.0491154	0.0189613	0.0637507	0.00950131	0.562231	1.35983	0.386055	0.149039	0.114756	4.86078	4.90275	5.68591	0.0411649	0.0263812	0.0321184	0.0131913	1.19223	1.97799	0.640867	0.41071	0.0931805	6.28949	6.30853	7.10402	0.0747083	0.0366281	0.0763135	0.018344	0.787807	1.78796	0.490282	0.240377	0.211156	6.21005	6.24701	7.74007	0.0618804	0.0420396	0.0455241	0.0210113	0.639822	3.45086	0.679369
10	4	1	1	7.31845	7.40928	8.95832	0.0329721	0.0381848	0.0142559	0.0191197	2.27492	3.5433	1.15809	1.34118	0.0662808	7.97843	8.00868	8.81522	0.0532584	0.037079	0.0382582	0.0185441	0.563948	3.49169	0.696211	0.484709	0.0983135	7.87055	7.89583	8.79771	0.0377757	0.0238754	0.0298736	0.0119335	1.26784	1.90799	0.632032	0.399464	0.088014	7.6511	7.66137	8.16913	0.0477797	0.0189666	0.0603031	0.00950238	0.857502	1.17662	0.39696
10	1	1	1	7.55026	7.56539	8.25497	0.0739297	0.0353961	0.0776489	0.0177995	0.697726	2.39641	0.478781	0.229231	0.1883	6.8968	6.93188	7.84037	0.052574	0.0366625	0.0376956	0.0183313	0.888443	2.76548	0.697352	0.486299	0.122547	7.17939	7.18845	7.6826	0.0712094	0.0257136	0.098944	0.0129016	0.441911	2.12942	0.361099	0.130393	0.171443	7.33638	7.34792	8.13776	0.0392181	0.0161613	0.0477598	0.00811036	0.672582	1.38848	0.412087
10	2	1	1	6.04767	6.05499	6.47871	0.0677536	0.0201975	0.113736	0.0101071	0.299708	1.16193	0.298102	0.0888648	0.190828	6.48532	6.50331	7.4378	0.0610208	0.0295313	0.0632133	0.0148053	0.708868	1.76421	0.483954	0.234211	0.160498	5.77262	5.78978	6.7558	0.0613729	0.0273715	0.0689384	0.0137121	0.545791	1.76126	0.445986	0.198904	0.168834	6.39553	6.45966	7.76365	0.0595077	0.0540974	0.0327929	0.0271011	1.60903	2.90423	0.909083
10	3	1	1	6.11706	6.1527	7.59967	0.0584935	0.0387344	0.0440975	0.0193372	0.713629	2.47005	0.6622	0.438509	0.148945	4.71683	4.7296	5.29304	0.0723748	0.0251716	0.104109	0.0125931	0.604647	1.1169	0.347795	0.120961	0.195007	6.81725	6.82358	7.33732	0.0655223	0.0192792	0.111584	0.00966053	0.438706	1.15484	0.294238	0.086576	0.192138	6.22621	6.23996	7.20721	0.0572436	0.0237298	0.0691854	0.0118891	0.515497	1.57116	0.414541
10	4	1	1	6.8931	6.97052	9.17319	0.056189	0.0582985	0.0270329	0.0291008	1.4073	4.00176	1.03754	1.07649	0.139472	7.84344	7.85949	8.72425	0.0650931	0.0327306	0.0647084	0.0163605	0.988349	1.53109	0.502827	0.252835	0.18394	8.11603	8.1247	8.94425	0.0563981	0.0211984	0.0751555	0.0106178	0.47519	1.38849	0.37587	0.141278	0.143568	7.7163	7.71843	7.90798	0.0550475	0.0100001	0.152119	0.00502014	0.154802	0.854845	0.181663
10	1	1	1	7.59442	7.6055	8.45542	0.0649143	0.0266668	0.0796138	0.0134353	0.493834	2.19887	0.4108	0.168756	0.166646	7.36935	7.38577	8.09204	0.0454638	0.0224066	0.0463292	0.0112532	0.882448	1.70017	0.492846	0.242897	0.103686	7.36707	7.38737	8.43658	0.0494052	0.0270693	0.0452303	0.0135781	0.815433	2.09282	0.547905	0.3002	0.107835	7.73394	7.76681	8.50911	0.0664286	0.0474779	0.0466432	0.0238265	1.12723	2.24073	0.71472
10	2	1	1	5.65272	5.69355	7.17594	0.0638076	0.043484	0.0468043	0.021737	1.01925	2.60517	0.681486	0.464423	0.176223	6.84161	6.85635	7.74871	0.0810403	0.0364495	0.0901606	0.0182389	0.625592	1.75281	0.449771	0.202294	0.25666	5.22155	5.26408	6.4629	0.0701425	0.0468975	0.0524119	0.0234298	1.08502	2.32561	0.668604	0.447031	0.189197	5.79005	5.84113	7.15862	0.0555997	0.0429098	0.0360432	0.021468	1.29004	2.62818	0.771762
10	3	1	1	6.02666	6.03522	6.58989	0.0998715	0.0321373	0.155816	0.0161342	0.503256	1.17507	0.321787	0.103547	0.308236	4.98157	5.011	5.94017	0.0654181	0.0355199	0.0603184	0.0177827	0.612439	2.11204	0.542967	0.294813	0.164957	6.80021	6.84573	8.08734	0.0587678	0.0463836	0.0372933	0.0232318	1.24266	2.6849	0.78927	0.622947	0.137282	6.9815	7.00024	8.21444	0.0571406	0.029288	0.0557619	0.0146497	0.349837	2.14414	0.512561
10	4	1	1	7.14235	7.24439	9.44814	0.0300014	0.0363945	0.0123505	0.018175	1.70911	3.86835	1.21309	1.4716	0.0663294	8.10366	8.11104	8.85463	0.0599742	0.0207645	0.0865768	0.0103781	0.400792	1.54148	0.346225	0.119871	0.151605	8.10799	8.11397	8.71787	0.0725612	0.022623	0.116809	0.0113545	0.451422	1.25301	0.311778	0.0972058	0.2191	7.92212	7.93538	9.06335	0.0632481	0.0290388	0.0693155	0.0146114	0.329582	2.02626	0.459125
10	1	1	1	7.19491	7.22033	8.53674	0.0673947	0.0408413	0.0557516	0.0204741	0.624705	2.72136	0.606001	0.367238	0.210709	7.25563	7.26722	8.00868	0.0817392	0.0335659	0.099798	0.0168289	0.590184	2.29375	0.410646	0.16863	0.202555	6.74025	6.7818	8.73094	0.0603459	0.0452743	0.0403161	0.0226927	0.831857	3.03858	0.750246	0.562869	0.162581	7.39166	7.40442	8.17745	0.0764004	0.0332343	0.0879487	0.0166423	0.526261	1.72411	0.435002
10	2	1	1	5.66389	5.70568	7.83634	0.0484991	0.0334685	0.0351795	0.016753	0.540491	3.70301	0.690084	0.476216	0.0961602	6.39321	6.40849	7.23461	0.0816167	0.036143	0.0925341	0.0181464	0.731955	1.70309	0.442838	0.196105	0.262334	5.49036	5.50745	6.57659	0.0659449	0.0286191	0.076066	0.0143265	0.565564	1.72494	0.433985	0.188343	0.171436	5.47341	5.51037	6.63497	0.0742543	0.0473664	0.0582271	0.0236932	0.674113	2.76775	0.637895
10	3	1	1	6.76031	6.76959	7.14482	0.0499886	0.0177266	0.0704991	0.0088653	0.50939	1.63088	0.354613	0.125751	0.09663	4.93377	4.94848	5.52255	0.0654292	0.0249771	0.0860707	0.0125428	0.528589	1.52835	0.381742	0.145727	0.174897	6.67036	6.70336	7.91706	0.0631942	0.042032	0.0475112	0.0210185	1.14416	2.35587	0.665125	0.442391	0.16805	6.4913	6.5423	8.32577	0.0541996	0.0442406	0.0331574	0.0220918	1.17585	3.31194	0.816254
10	4	1	1	7.37425	7.41145	8.79382	0.0541766	0.0402289	0.0364332	0.0200886	1.15658	2.6996	0.74255	0.551381	0.131571	8.25998	8.27637	9.44314	0.041796	0.0217865	0.0402293	0.0109307	0.555461	2.08542	0.521258	0.27171	0.0823835	8.2257	8.24632	9.52523	0.0537056	0.0313357	0.0461602	0.0157147	0.538306	3.06221	0.583471	0.340438	0.120958	8.09315	8.1072	8.92999	0.0695778	0.0332341	0.0728749	0.0166266	0.772635	1.77733	0.477653
10	1	1	1	7.34213	7.37278	8.78789	0.0757273	0.0509155	0.0564147	0.0255028	1.02173	2.63706	0.672354	0.452059	0.227884	7.38062	7.39991	8.08988	0.0487362	0.0260497	0.0456592	0.0130446	0.915744	2.01343	0.534504	0.285694	0.10812	6.24661	6.25668	6.76688	0.0634379	0.0225401	0.0893233	0.0112766	0.522379	1.29989	0.355309	0.126245	0.174762	7.55036	7.56823	8.49363	0.0526585	0.0273985	0.0505618	0.013688	0.622378	2.0856	0.520306
10	2	1	1	5.59763	5.61695	6.62333	0.0720606	0.033584	0.0774077	0.0168133	0.649378	1.67958	0.466052	0.217205	0.195032	6.82396	6.86957	8.01913	0.050772	0.0401715	0.0320235	0.0200474	1.10734	2.94693	0.791214	0.62602	0.132883	4.70952	4.75401	5.74692	0.0562863	0.0365656	0.0433949	0.0183138	0.859668	2.40145	0.649635	0.422025	0.140952	5.9941	6.01505	6.76772	0.0597486	0.0300012	0.0595598	0.0150167	0.717084	1.92868	0.502124
10	3	1	1	6.62441	6.63903	7.49982	0.0535035	0.0235888	0.0608253	0.0118231	0.758233	1.49122	0.440883	0.194378	0.143412	4.83829	4.85732	6.15438	0.0688293	0.0295951	0.0800819	0.0148057	0.57409	1.98791	0.429978	0.184882	0.157927	6.59225	6.62628	8.14981	0.0478967	0.0321631	0.0357252	0.0161094	0.857804	2.4041	0.671509	0.450925	0.117388	6.27177	6.31868	7.50746	0.0551341	0.0424221	0.0358254	0.0212097	1.01634	2.99475	0.769435
10	4	1	1	7.24263	7.2805	8.58758	0.0499334	0.0370778	0.0338181	0.0186464	1.1767	2.62024	0.742545	0.551373	0.136199	8.06159	8.07051	8.72902	0.0749252	0.0284572	0.0990191	0.0142839	0.406579	2.11774	0.379808	0.144254	0.18761	8.11373	8.14775	9.3665	0.0558262	0.0415731	0.0375614	0.0208301	0.622886	3.03459	0.744688	0.554561	0.147294	7.5647	7.57683	8.18377	0.0544386	0.0233618	0.0637476	0.0117399	0.726495	1.9355	0.42914
11	1	1	1	6.54077	6.55598	7.24051	0.0762186	0.0340534	0.0859662	0.0171604	0.419935	2.87536	0.446787	0.199618	0.169401	7.21916	7.24675	8.36327	0.0715423	0.0452446	0.0565472	0.0226162	0.600391	2.95668	0.632417	0.399951	0.210383	6.37177	6.40706	7.50833	0.0431021	0.0289737	0.0321751	0.0145389	1.13297	3.35207	0.672211	0.451868	0.0910586	6.8143	6.84957	7.93408	0.0684393	0.0475608	0.0494662	0.0238889	1.23932	2.38246	0.694934
11	2	1	1	3.59296	3.66009	5.12299	0.0632825	0.0442049	0.0453256	0.0221165	1.21889	2.57828	0.698533	0.487948	0.190648	5.75096	5.76523	6.44224	0.0833452	0.0338207	0.102723	0.016915	0.447226	1.69866	0.405791	0.164666	0.253289	2.713	2.72402	3.28486	0.0872087	0.0213746	0.178739	0.0107373	0.237132	1.11843	0.245097	0.0600727	0.278941	3.52847	3.54871	4.40689	0.0674658	0.0255637	0.0891032	0.012793	0.558773	1.43187	0.378913
11	3	1	1	3.91354	3.92502	4.37489	0.0829594	0.0249165	0.138086	0.0124564	0.432912	1.08207	0.300346	0.0902077	0.25488	3.90675	4.0577	5.78686	0.0731129	0.0802495	0.0333149	0.040136	2.00415	3.92287	1.09761	1.20475	0.21914	3.27147	3.3538	4.86132	0.0687439	0.0508235	0.0464884	0.02541	0.847687	3.13148	0.739316	0.546588	0.201877	3.2234	3.2711	4.23149	0.0808506	0.0450489	0.0725719	0.0225305	0.729405	2.12206	0.557187
11	4	1	1	4.96571	5.17006	7.77906	0.0538977	0.0776551	0.0186947	0.0388076	1.84572	6.25571	1.44079	2.07586	0.12812	6.9798	7.07725	8.44256	0.060781	0.0712168	0.0259339	0.0356039	1.85559	3.8858	1.17169	1.37287	0.166484	5.38488	5.41529	6.54217	0.0758206	0.0435043	0.0664008	0.0218607	0.651703	2.20322	0.57378	0.329223	0.229988	5.83537	5.90847	7.13461	0.0498098	0.0462018	0.0268718	0.0231199	1.46862	3.39344	0.927564
11	1	1	1	6.65467	6.68536	7.49376	0.0588442	0.0376873	0.0460349	0.0188829	0.808407	3.46286	0.640459	0.410187	0.135129	7.09578	7.12108	8.35625	0.0732118	0.0439535	0.061049	0.0220041	0.941591	2.64594	0.600361	0.360433	0.216226	6.42788	6.4753	8.19523	0.053452	0.0418502	0.0341986	0.020964	1.1219	3.83219	0.782949	0.613008	0.123602	5.49022	5.54626	7.33861	0.0569803	0.0448547	0.0362195	0.0224444	1.19167	2.95089	0.787196
11	2	1	1	3.57967	3.62769	4.92112	0.0789852	0.0465117	0.0670883	0.0232637	0.949134	2.34674	0.588866	0.346763	0.235196	6.16007	6.1924	7.30204	0.0878531	0.0555772	0.069534	0.0278277	0.871374	2.73547	0.632615	0.400202	0.266835	2.69125	2.72433	3.64265	0.0633728	0.0268505	0.0749695	0.0134581	0.60092	1.65742	0.423691	0.179514	0.17248	3.45955	3.48179	4.39539	0.0897835	0.035312	0.114089	0.017648	0.525446	1.70986	0.393302
11	3	1	1	4.15625	4.17109	5.10177	0.0560437	0.0197301	0.079715	0.00987971	0.376239	1.35282	0.352048	0.123938	0.154581	3.42581	3.56632	6.15189	0.0595701	0.0591143	0.0299703	0.0295134	0.906572	4.01092	0.992348	0.984755	0.15666	2.94898	3.00561	4.42023	0.100958	0.0586954	0.0869306	0.0293833	0.761933	2.57248	0.581385	0.338009	0.333191	3.31625	3.33477	4.15362	0.0749978	0.0263555	0.106521	0.0131546	0.405309	1.49398	0.351417
11	4	1	1	5.63336	5.85133	7.61995	0.0400989	0.063512	0.0126556	0.0317491	1.93407	5.74528	1.58388	2.50869	0.0852587	7.75767	7.79442	9.04627	0.0708052	0.0535853	0.0468636	0.0268409	1.1946	2.99702	0.756799	0.572744	0.20203	5.17618	5.21269	6.87691	0.0607321	0.0374438	0.0492762	0.018731	0.699324	2.63784	0.616541	0.380122	0.173212	7.05817	7.11911	8.55555	0.0791837	0.0736784	0.0426029	0.0368849	1.41944	3.69484	0.930474
11	1	1	1	5.97127	6.03419	6.9998	0.0595947	0.0518545	0.0342333	0.0259183	0.835448	3.73635	0.870119	0.757108	0.156268	6.96359	6.98356	7.87697	0.0755306	0.0399	0.071543	0.0199649	0.810629	2.05703	0.528263	0.279061	0.235007	6.52083	6.58936	7.68657	0.0385284	0.0365605	0.0202821	0.0182631	0.836737	4.29403	0.948923	0.900454	0.0705772	5.58846	5.61973	6.53734	0.0813195	0.048192	0.0688348	0.0241751	0.629404	2.51523	0.592625
11	2	1	1	3.86532	3.88192	4.41366	0.0859479	0.0308583	0.119648	0.0154233	0.557245	1.25032	0.359034	0.128906	0.249418	6.0717	6.08041	6.70482	0.0844064	0.0275082	0.129505	0.013755	0.574486	1.20016	0.325902	0.106212	0.259806	2.92512	2.95217	3.91018	0.0939931	0.0375306	0.117962	0.0188072	0.479429	1.63115	0.399291	0.159434	0.288622	3.87839	3.91576	4.85317	0.0535533	0.0289406	0.0494814	0.0144506	0.898094	1.83744	0.540409
11	3	1	1	4.72223	4.73354	5.59315	0.0777844	0.025464	0.118842	0.0127362	0.374509	1.45807	0.327367	0.107169	0.214172	3.30787	3.38053	5.07154	0.0507235	0.0354008	0.0363533	0.0177072	0.85144	2.54176	0.697916	0.487087	0.127937	3.02464	3.0474	3.80665	0.0773548	0.028791	0.104001	0.014407	0.444556	1.39691	0.372194	0.138528	0.240857	3.51015	3.58768	4.77069	0.0510195	0.0378892	0.0343263	0.0189315	1.36126	2.43124	0.742642
11	4	1	1	5.9859	6.13372	8.39611	0.0412941	0.0553323	0.015411	0.0276701	2.41972	4.4944	1.33996	1.79548	0.101638	7.31708	7.46392	9.36759	0.0580837	0.085666	0.0196751	0.0427981	2.70535	5.69263	1.47487	2.17524	0.160616	6.44089	6.57487	8.35169	0.0341619	0.0451622	0.0129147	0.022571	2.01967	4.77736	1.32201	1.7477	0.0692693	7.07984	7.12801	8.14283	0.0816441	0.0676152	0.0493433	0.0338428	1.25791	3.8472	0.82817
11	1	1	1	6.41936	6.44231	7.20853	0.078579	0.0427417	0.0724298	0.0214292	0.649664	2.12047	0.543932	0.295862	0.230917	7.2929	7.32013	8.19875	0.0742287	0.0468728	0.058718	0.0234137	1.11894	2.43904	0.631466	0.398749	0.230263	6.83003	6.84746	7.64612	0.10555	0.051598	0.108193	0.0258553	0.768317	2.63916	0.48885	0.238975	0.300967	6.02423	6.09105	7.64679	0.0409315	0.0368672	0.0227301	0.0184403	1.51186	3.24556	0.900705
11	2	1	1	4.001	4.04475	5.10053	0.0749106	0.0444946	0.0630519	0.0222447	0.936652	2.32371	0.593969	0.3528	0.241377	5.77322	5.78794	6.69882	0.08764	0.0361921	0.106062	0.0180877	0.659753	1.53997	0.412963	0.170539	0.271135	2.76718	2.77899	3.19848	0.106064	0.0271661	0.207219	0.0135941	0.418755	0.947694	0.25613	0.0656026	0.326317	3.4931	3.51578	4.32956	0.0946149	0.0377669	0.118695	0.018912	0.653812	1.60818	0.399165
11	3	1	1	4.0905	4.11624	5.12542	0.059394	0.0273297	0.0646946	0.0136978	0.838591	1.70839	0.460142	0.211731	0.152872	3.10731	3.20736	4.50494	0.0712538	0.0567003	0.0447448	0.0283333	1.20685	2.93841	0.795752	0.633221	0.211936	2.69172	2.7403	3.76133	0.0859115	0.0441817	0.0834944	0.0220821	0.815486	2.00772	0.51427	0.264474	0.265712	3.35527	3.44388	4.9861	0.0601004	0.0467014	0.0386409	0.0233321	0.760544	3.43622	0.777056
11	4	1	1	3.2729	3.33623	4.23622	0.150984	0.0981436	0.116341	0.0491582	1.01438	2.4303	0.650026	0.422534	0.280957	6.54234	6.58022	7.56598	0.0813378	0.0576184	0.0573945	0.028801	1.47151	1.87381	0.708384	0.501808	0.162545	4.75613	5.05085	8.06087	0.0767871	0.131165	0.0223722	0.0652787	2.91319	5.18959	1.70817	2.91785	0.085635	5.77311	5.90013	8.2175	0.0625364	0.0765125	0.025405	0.0380293	2.04552	3.61672	1.22349
11	1	1	1	5.73115	5.7582	6.53274	0.0821361	0.0458352	0.0736304	0.0229292	0.672894	2.27981	0.55804	0.311409	0.217912	7.3345	7.34621	8.30933	0.082159	0.0340976	0.0990097	0.0170535	0.613879	1.7463	0.415019	0.172241	0.262562	6.40431	6.44843	7.46161	0.0646506	0.0487364	0.0430123	0.0244431	1.37253	3.35204	0.753844	0.56828	0.161057	6.01353	6.0483	7.18105	0.0917646	0.0594941	0.0707795	0.0297512	1.09405	2.28745	0.648334
11	2	1	1	3.44079	3.46578	4.22753	0.07722	0.0321116	0.0928189	0.016051	0.72401	1.47807	0.415846	0.172928	0.233698	5.76286	5.79691	6.80286	0.0699861	0.043957	0.0557109	0.0219772	0.862354	2.64522	0.628082	0.394487	0.203994	2.7607	2.78666	3.38569	0.080385	0.0305364	0.105925	0.0152857	0.571407	1.82913	0.379877	0.144307	0.208111	3.57868	3.61002	4.75707	0.0721801	0.0342989	0.076251	0.0172176	0.527755	1.86377	0.475186
11	3	1	1	4.23665	4.2538	5.37187	0.0769901	0.029407	0.100697	0.0146909	0.417194	1.66949	0.381958	0.145892	0.206269	3.69748	3.79433	5.34986	0.096487	0.0822783	0.0565091	0.0410914	1.34644	3.48384	0.852739	0.727165	0.314033	3.35016	3.44412	5.01766	0.0708501	0.056667	0.0443034	0.0283411	1.26703	3.15297	0.799816	0.639705	0.218756	3.50346	3.54356	4.50692	0.0848314	0.0451434	0.0800588	0.0226718	0.93302	1.82261	0.532155
11	4	1	1	5.77668	6.00235	8.2065	0.0388205	0.0633628	0.0119303	0.0317833	2.10801	6.18479	1.6322	2.66408	0.0883562	7.35316	7.4322	9.1649	0.054136	0.0585889	0.0250143	0.0292986	1.30955	4.76787	1.08225	1.17128	0.162089	6.2654	6.33595	7.89746	0.0435388	0.0410962	0.0230788	0.0205619	1.89098	2.97516	0.943898	0.890944	0.117959	6.48101	6.54579	8.10512	0.0426143	0.0391897	0.0231709	0.0195964	1.75156	3.2923	0.919636
12	1	1	1	8.72492	8.72597	9.02633	0.0664514	0.00900241	0.245382	0.00450352	0.189643	0.522216	0.135474	0.0183531	0.190542	8.63222	8.63906	9.18959	0.0546096	0.0187963	0.0796082	0.00943117	0.419151	1.62649	0.344194	0.11847	0.116783	8.03378	8.04409	8.65257	0.0658539	0.0268477	0.0808519	0.0134382	0.59915	2.02713	0.407685	0.166207	0.1337	7.71818	7.73799	8.74848	0.0342118	0.0189535	0.0309423	0.00949681	0.702663	1.92265	0.554003
12	2	1	1	5.79236	5.80305	6.56852	0.0471333	0.0166108	0.0670899	0.00833265	0.456316	1.30211	0.352422	0.124201	0.114713	6.77772	6.78622	7.44852	0.0583403	0.0198364	0.0859708	0.00993898	0.457833	1.29355	0.340013	0.115609	0.157679	5.89176	5.926	7.01965	0.0612872	0.0390341	0.0481027	0.0195127	1.0622	2.33101	0.636905	0.405647	0.164342	4.29471	4.32486	5.31185	0.0453127	0.0231268	0.0443121	0.0115429	0.752343	1.69047	0.510383
12	3	1	1	5.50562	5.51365	5.88476	0.0409817	0.012207	0.0687944	0.00610365	0.174959	1.47846	0.297864	0.0887231	0.0708531	3.44666	3.48483	4.42638	0.0467782	0.0240862	0.045396	0.0120356	0.540576	1.96526	0.514903	0.265125	0.117925	6.62983	6.64641	7.48946	0.0493134	0.0231615	0.0525228	0.0115865	0.838424	1.50622	0.469681	0.2206	0.121807	4.7549	4.81961	5.98577	0.0282002	0.0222218	0.0179453	0.0111431	1.15573	2.6785	0.788003
12	4	1	1	6.81264	6.84697	7.45302	0.0707492	0.0486605	0.0516187	0.0244184	1.00135	2.29663	0.687789	0.473054	0.0468359	8.3147	8.32278	8.96201	0.090304	0.0332566	0.122267	0.0165824	0.635419	1.12031	0.368273	0.135625	0.180286	8.87863	8.89944	10.0556	0.0539843	0.0329732	0.0440523	0.0164344	1.0882	1.78426	0.610792	0.373067	0.018891	7.37761	7.37986	7.69683	0.0759827	0.0138779	0.210006	0.00700567	0.189636	0.805038	0.182646
12	1	1	1	8.65974	8.67085	9.54343	0.0567224	0.0249156	0.0649576	0.0125332	0.743622	1.9748	0.439255	0.192945	0.145429	7.93988	7.94943	8.85826	0.0630794	0.0245898	0.0813706	0.0123652	0.580617	1.63931	0.389822	0.151961	0.207192	8.01885	8.02952	8.7067	0.0456653	0.0189179	0.0550937	0.00945523	0.498858	1.68628	0.414272	0.171621	0.118505	7.22371	7.2275	7.69311	0.0597842	0.0139947	0.128084	0.00701863	0.3837	0.83851	0.234087
12	2	1	1	5.70298	5.71418	6.4143	0.0452653	0.0162116	0.0634643	0.00814045	0.556018	1.16643	0.358145	0.128268	0.114478	6.85997	6.87421	7.73409	0.0589079	0.0260802	0.0666956	0.0130728	0.726365	1.43961	0.442728	0.196008	0.151209	5.80224	5.82367	6.66972	0.0706641	0.035316	0.0707487	0.0176711	0.882662	1.71128	0.499773	0.249773	0.178802	4.3661	4.39894	5.18177	0.0317041	0.0170323	0.0296017	0.00854342	0.236375	2.24043	0.537226
12	3	1	1	5.11552	5.13315	5.88262	0.0531543	0.0226188	0.06263	0.0113408	0.73429	1.47119	0.425531	0.181076	0.128416	3.28645	3.29806	3.63124	0.0599936	0.0166098	0.108399	0.00830892	0.340808	1.0149	0.27686	0.0766514	0.148381	5.96123	5.98861	7.42652	0.0477684	0.0273568	0.0417953	0.0137081	0.729787	2.16151	0.572696	0.327981	0.109811	4.43396	4.46253	5.38949	0.02847	0.0143688	0.0282976	0.00720798	0.219826	2.20892	0.504698
12	4	1	1	6.85965	6.94045	8.81871	0.0552591	0.0584339	0.0261445	0.029235	1.21511	4.68889	1.05745	1.11821	0.118695	7.92183	7.99779	9.51017	0.0392793	0.0432525	0.0178486	0.0216422	1.23081	4.58071	1.10115	1.21254	0.0691631	8.8673	8.88195	9.65319	0.0708812	0.0361908	0.0695752	0.018138	0.878199	1.99995	0.510585	0.260697	0.183365	7.32012	7.33471	8.04055	0.0612359	0.0283488	0.0664211	0.0142352	0.824553	2.00698	0.462944
12	1	1	1	9.45485	9.45667	9.70041	0.0438333	0.0081511	0.118532	0.00409881	0.365723	0.527283	0.185957	0.0345799	0.0851468	7.25146	7.25385	7.50482	0.046064	0.0085966	0.123512	0.00430168	0.376894	0.52911	0.186623	0.0348281	0.0974284	8.75624	8.76282	9.4201	0.0426289	0.0145054	0.0632071	0.00731843	0.264562	1.73822	0.340272	0.115785	0.0131949	7.35256	7.36093	7.94309	0.0446412	0.0157002	0.0639541	0.00791052	0.641784	1.0537	0.351697
12	2	1	1	5.79669	5.82348	6.97996	0.0416007	0.0232378	0.0372793	0.011632	0.881279	1.90769	0.558591	0.312024	0.0892303	6.58971	6.60657	7.33903	0.0413322	0.0195129	0.043787	0.00975911	0.845335	1.51092	0.472098	0.222877	0.0881503	5.94338	5.97723	6.93498	0.0391576	0.0249038	0.0307813	0.0124504	0.668164	2.28872	0.635987	0.40448	0.0905221	4.29258	4.31342	5.13604	0.0634394	0.0268983	0.0750681	0.0134954	0.551341	1.59749	0.424
12	3	1	1	5.62373	5.64908	6.43608	0.0265227	0.0141933	0.0249149	0.00713497	0.967765	1.6446	0.535139	0.286373	0.0518653	3.59958	3.63095	4.17929	0.0227797	0.0108614	0.0240557	0.00546881	0.956551	1.33958	0.476801	0.227339	0.0454086	5.91743	5.9502	7.16604	0.0477405	0.0298022	0.0382631	0.0149108	0.923036	2.16601	0.624253	0.389691	0.115737	4.85415	4.90375	6.12836	0.0370481	0.0258011	0.0265958	0.012899	1.15057	2.29592	0.696421
12	4	1	1	5.89991	5.9454	6.97062	0.0436415	0.0320789	0.0297877	0.0160944	0.809291	3.25082	0.735054	0.540305	0.0678203	8.37876	8.45308	9.68053	0.0272096	0.0304729	0.0121618	0.0152538	1.69309	3.41899	1.11993	1.25424	0.0410011	9.84903	9.85682	10.3713	0.0468376	0.0183756	0.0602597	0.00927516	0.557988	2.12721	0.392326	0.15392	0.0631725	8.18468	8.24101	9.63488	0.0402888	0.0388085	0.0209648	0.0194526	0.854101	3.89764	0.963258
12	1	1	1	8.2912	8.30595	9.11081	0.0406589	0.0201367	0.0411581	0.0100954	0.640132	1.75357	0.49526	0.245283	0.0898062	8.0653	8.07213	8.62523	0.072608	0.0241397	0.109647	0.0121197	0.439471	1.30126	0.332466	0.110534	0.214708	8.56907	8.57413	9.12223	0.0478853	0.0141172	0.0812913	0.00706544	0.419995	1.30725	0.294814	0.0869151	0.0942246	8.06871	8.07732	8.67869	0.0497252	0.0185661	0.0667113	0.00930008	0.69264	1.27203	0.373374
12	2	1	1	5.93834	5.94831	6.53623	0.0726561	0.02504	0.105585	0.0125408	0.618076	1.17548	0.344637	0.118775	0.201664	6.84928	6.86655	7.72992	0.0544514	0.0265328	0.0558209	0.0132539	0.740578	1.78599	0.487275	0.237437	0.132262	5.10879	5.12949	5.96973	0.0437511	0.0201665	0.0475912	0.0101113	0.680215	1.59854	0.460936	0.212462	0.105044	3.9516	3.96776	4.39747	0.034901	0.0124982	0.0487243	0.00624831	0.454859	1.21153	0.358103
12	3	1	1	5.67109	5.68744	6.31258	0.0388947	0.0167781	0.045076	0.00838785	0.742382	1.44558	0.431373	0.186082	0.0932896	3.63433	3.66762	4.64842	0.043421	0.0214311	0.0441554	0.0107566	0.750973	1.81008	0.493566	0.243607	0.099699	5.5608	5.58905	6.44768	0.0465936	0.0261785	0.0414824	0.0130949	0.652383	2.10705	0.561849	0.315674	0.117385	4.0647	4.10914	5.08345	0.0590147	0.0356053	0.0489057	0.017802	1.0185	2.18089	0.60333
12	4	1	1	7.02053	7.06473	8.17649	0.081276	0.0642215	0.0515881	0.0322097	1.26946	2.97582	0.790166	0.624363	0.215684	8.60523	8.66235	9.82576	0.0289067	0.028746	0.0145875	0.0144257	1.78656	3.10647	0.994441	0.988913	0.0493251	8.9913	9.02704	10.1842	0.046751	0.0375672	0.0291192	0.0188025	0.883949	3.80356	0.80356	0.645708	0.072522	8.49243	8.51044	9.33566	0.0490112	0.0271563	0.0444258	0.0136391	1.0647	2.13598	0.554084
12	1	1	1	8.45942	8.50034	9.79037	0.0360255	0.0300488	0.0215955	0.0150244	0.788366	3.57066	0.834096	0.695717	0.0614627	8.32896	8.33636	8.90024	0.0446061	0.0156804	0.0637333	0.00787577	0.574162	1.23973	0.351531	0.123574	0.103237	8.91992	8.9645	10.5228	0.0314625	0.0281258	0.0176066	0.0140701	1.08996	3.4015	0.893945	0.799138	0.0606026	7.67207	7.68206	8.32964	0.0320799	0.0125775	0.0409791	0.00629914	0.497471	1.72101	0.392066
12	2	1	1	5.7828	5.79143	6.34614	0.0531318	0.0168126	0.0840883	0.00841971	0.506566	1.12395	0.316432	0.100129	0.139094	6.69729	6.72193	7.8201	0.0466347	0.0268463	0.0404936	0.0134196	0.627344	2.04515	0.575673	0.331399	0.112167	6.07014	6.10256	7.14964	0.0387382	0.0243649	0.0308508	0.0122044	1.07215	2.0831	0.628962	0.395593	0.0825039	4.18644	4.20717	5.16009	0.0401048	0.0167486	0.0480702	0.00838383	0.475499	1.4019	0.417622
12	3	1	1	6.22307	6.25007	7.27934	0.0342797	0.0199163	0.029624	0.00999968	0.762657	1.99649	0.580993	0.337553	0.0701787	4.15127	4.17076	4.82144	0.0292042	0.0117776	0.0362989	0.00590358	0.790012	1.20486	0.403284	0.162638	0.0547413	6.46407	6.48865	7.48032	0.0423776	0.0239384	0.0374868	0.0119618	0.428041	2.19277	0.564883	0.319093	0.099349	4.31397	4.32307	4.81872	0.0502194	0.0140897	0.0898759	0.00707467	0.507358	0.916588	0.280564
12	4	1	1	6.40377	6.52813	8.8175	0.0306778	0.0389473	0.0120629	0.0194428	1.37187	5.10815	1.26956	1.61178	0.0545934	7.47968	7.52632	9.18263	0.038316	0.0320918	0.0228786	0.0160493	1.26982	2.89805	0.837556	0.7015	0.086727	9.27316	9.36719	10.7968	0.0401918	0.05327	0.0151667	0.0266429	1.55202	5.26602	1.3254	1.75667	0.0801913	8.15596	8.18824	9.30472	0.0441491	0.0321005	0.0304085	0.0160758	1.30511	2.54064	0.727092
13	1	1	1	8.2193	8.25045	9.27594	0.0378123	0.0270987	0.0263788	0.0135483	0.875739	3.2626	0.716663	0.513606	0.084906	7.25296	7.2678	8.0147	0.0366771	0.017031	0.0394899	0.0085148	0.568364	2.15564	0.464349	0.21562	0.0797279	7.38036	7.40107	8.63469	0.0371236	0.0205546	0.0335705	0.0102914	0.744351	2.37567	0.553681	0.306562	0.0889099	7.05518	7.07187	8.197	0.0356847	0.017338	0.0367173	0.00866769	0.551028	1.94506	0.485866
13	2	1	1	5.78177	5.80698	6.63614	0.0295372	0.015975	0.0273261	0.00799322	0.539117	2.14415	0.540844	0.292512	0.0722264	7.24578	7.26404	8.26136	0.0413419	0.0212955	0.0401377	0.0106499	0.7669	2.13875	0.515107	0.265335	0.109188	4.91703	4.96234	6.36241	0.0398833	0.0267009	0.0298067	0.0133593	1.04502	2.7687	0.669475	0.448196	0.0916857	5.52837	5.55735	6.41536	0.0357902	0.0202998	0.0315499	0.0101497	0.691142	2.41531	0.567188
13	3	1	1	6.97025	6.99469	8.03959	0.0388477	0.0227055	0.0332409	0.0113555	0.887112	2.21609	0.584477	0.341613	0.0917418	6.04278	6.0706	7.42206	0.0420841	0.0244456	0.0362339	0.0122259	0.739663	2.29208	0.580875	0.337416	0.106579	7.49178	7.50673	8.33703	0.0317088	0.015022	0.033464	0.00751063	0.737095	1.57287	0.47375	0.224439	0.0742037	6.74905	6.79195	8.10049	0.0330154	0.0251771	0.0216273	0.0125771	1.09445	3.00449	0.762586
13	4	1	1	8.27683	8.30984	9.14775	0.027071	0.0200423	0.0182915	0.0100262	0.492687	3.9245	0.740361	0.548135	0.0513887	8.52889	8.54056	9.33044	0.037855	0.0169049	0.0423977	0.00845514	0.679111	1.61707	0.446569	0.199424	0.0886139	7.48938	7.52989	8.42485	0.0296731	0.0231585	0.0189935	0.0115691	1.12809	3.19623	0.780453	0.609108	0.0629248	7.5969	7.63344	8.55407	0.023852	0.0178027	0.0159811	0.00890284	0.634904	3.47342	0.746382
13	1	1	1	8.19087	8.20059	8.89569	0.0496506	0.0198291	0.0621577	0.0099141	0.525693	1.65125	0.399373	0.159499	0.130135	6.9099	6.93117	7.88182	0.0409156	0.0222122	0.0377039	0.011112	0.788799	2.193	0.542878	0.294717	0.102907	7.79173	7.80023	8.53824	0.0470496	0.017138	0.0646798	0.00858172	0.530244	1.70948	0.364253	0.13268	0.118752	7.50012	7.53088	8.84702	0.022937	0.0156069	0.0168544	0.00780323	1.01366	2.68136	0.680426
13	2	1	1	5.94468	5.9798	7.12057	0.0323855	0.0209698	0.0250235	0.0104914	0.992694	2.2769	0.647504	0.419261	0.077846	7.91873	7.92316	8.6141	0.0398099	0.0105457	0.0753046	0.00528432	0.236152	1.52398	0.264901	0.0701726	0.0912446	5.97209	6.01527	7.7675	0.036658	0.0263878	0.0254621	0.0131935	0.994332	2.94329	0.719836	0.518164	0.0928888	5.50273	5.5262	6.85061	0.0373239	0.0189981	0.0367063	0.00951013	0.671246	2.02648	0.509006
13	3	1	1	7.97401	7.99183	9.15871	0.0332388	0.0177391	0.0311231	0.00886449	0.604271	2.20374	0.533686	0.284821	0.0810614	7.18752	7.19867	8.21077	0.0393464	0.0157658	0.0491269	0.00788759	0.592258	1.72059	0.400694	0.160556	0.105604	7.62181	7.64218	8.45226	0.0368346	0.0205496	0.0330885	0.0102985	0.68748	2.51539	0.557889	0.31124	0.104534	7.58788	7.60023	8.51047	0.0342234	0.014828	0.0394821	0.0074117	0.665451	1.6383	0.43327
13	4	1	1	8.5282	8.54806	9.41715	0.0372951	0.0217332	0.0320092	0.0108697	0.952102	2.03874	0.582737	0.339582	0.0855368	8.2296	8.2551	9.29156	0.0292861	0.0189998	0.0225786	0.0095033	1.21115	2.24358	0.648767	0.420899	0.0651253	8.19645	8.24695	9.78899	0.0333144	0.0303783	0.0182885	0.0152069	1.35936	3.27151	0.911867	0.831501	0.0766847	7.68205	7.68989	8.35169	0.0348271	0.0121021	0.0501136	0.00605126	0.527048	1.48556	0.347492
13	1	1	1	8.29666	8.31906	9.4243	0.0272147	0.0166115	0.0222936	0.00830591	0.874363	2.45071	0.610384	0.372569	0.0607026	7.65207	7.67595	8.92623	0.0299792	0.0181472	0.0247484	0.00906833	0.896035	2.34259	0.605327	0.366421	0.0715322	7.43815	7.45723	8.36341	0.0385513	0.0205616	0.0361708	0.0102895	0.854965	2.85441	0.533358	0.284471	0.0978321	7.11505	7.14149	8.6393	0.0311149	0.0191149	0.0253426	0.00956434	1.18703	2.44637	0.61433
13	2	1	1	6.21396	6.22651	6.90912	0.0373579	0.0147692	0.0473026	0.0073932	0.387753	1.62448	0.395342	0.156296	0.0948302	8.06182	8.08655	8.8535	0.0267565	0.0169179	0.0211809	0.00846792	0.722755	2.57092	0.632289	0.39979	0.0574431	6.33278	6.41125	8.37927	0.0280855	0.0281002	0.0140319	0.0140466	1.22166	3.87044	1.00052	1.00105	0.0643585	5.98105	5.99714	6.77564	0.0413831	0.018177	0.0471613	0.00909881	0.686713	1.70453	0.439238
13	3	1	1	6.81113	6.83687	7.96628	0.0212352	0.0125928	0.0178948	0.00629304	1.09029	1.9003	0.593016	0.351668	0.0484871	6.18389	6.21634	7.2634	0.0304247	0.0193098	0.0239613	0.0096519	0.887905	2.24797	0.634675	0.402813	0.0683034	6.95312	6.97687	7.93459	0.0355714	0.0204747	0.030924	0.0102454	1.07026	1.97154	0.575593	0.331308	0.0863336	7.17263	7.18905	8.31705	0.0383069	0.0186091	0.039457	0.00931152	0.84938	2.02602	0.48579
13	4	1	1	8.53565	8.55388	9.17366	0.0313345	0.0174955	0.0281079	0.00876262	0.662202	1.90409	0.558346	0.31175	0.0702227	8.87654	8.88226	9.38423	0.0340737	0.0108692	0.0533842	0.00543206	0.48247	1.17555	0.318989	0.101754	0.0729554	8.26534	8.28498	9.56541	0.0428113	0.0244259	0.0375196	0.0122136	0.817621	2.3873	0.570549	0.325526	0.11277	8.68245	8.70218	9.79347	0.040428	0.0236871	0.0344698	0.0118331	0.760987	2.66775	0.585909
13	1	1	1	8.63273	8.65893	9.67712	0.0269718	0.0181651	0.0200255	0.00908323	0.665296	3.57613	0.673486	0.453584	0.0494132	6.78111	6.79394	7.73342	0.0312399	0.013047	0.0374343	0.00652938	0.623286	1.61667	0.417639	0.174422	0.0773653	7.3259	7.33673	7.87986	0.0248619	0.00991494	0.031236	0.00496783	0.301658	2.23047	0.398801	0.159042	0.0384766	7.119	7.13614	8.20527	0.0380266	0.0188104	0.0384614	0.00941127	0.677356	2.00091	0.494665
13	2	1	1	5.78546	5.82366	6.93008	0.0384954	0.0256505	0.0288743	0.0128199	0.73864	3.01626	0.666326	0.443991	0.101517	8.17241	8.20301	9.4284	0.0323656	0.0229252	0.0228418	0.0114601	1.04838	3.21997	0.708319	0.501715	0.0678489	5.67385	5.75196	7.75982	0.0374223	0.0353713	0.0197872	0.0176777	0.699286	4.48292	0.945192	0.893388	0.0981555	5.40999	5.44432	6.896	0.0391373	0.0239029	0.0320356	0.0119495	0.902197	3.03529	0.610744
13	3	1	1	6.53919	6.55342	7.25327	0.0412249	0.0178072	0.047747	0.00890872	0.801794	1.3834	0.431951	0.186582	0.0954492	5.45287	5.4693	6.27415	0.021775	0.00922909	0.0256981	0.00461638	0.728956	1.44242	0.423838	0.179639	0.0478713	7.63584	7.65923	9.16985	0.0343501	0.0205571	0.0287132	0.0102837	0.73951	2.6005	0.598459	0.358153	0.0783147	6.52565	6.54324	7.63556	0.0282509	0.0135509	0.0294413	0.00677371	0.67738	1.83118	0.479662
13	4	1	1	8.72448	8.73727	9.53048	0.0341978	0.0161725	0.0361503	0.00808482	0.762769	1.70592	0.472911	0.223644	0.079463	8.93595	8.94459	9.91562	0.0381993	0.0150207	0.0486487	0.00752211	0.564792	1.67201	0.393219	0.154621	0.0876344	8.49491	8.5026	9.07447	0.0333298	0.012052	0.046118	0.00603011	0.454456	1.47903	0.361599	0.130754	0.0843957	8.3954	8.40893	9.29668	0.0304349	0.0145227	0.0319137	0.00726648	0.667967	2.29654	0.477171
13	1	1	1	8.33459	8.35125	9.42172	0.037023	0.0195269	0.0351613	0.00978117	0.717972	3.25154	0.527428	0.27818	0.0875148	6.95809	6.98174	8.12268	0.0243636	0.0139968	0.0212026	0.00699779	0.399676	3.05182	0.574495	0.330044	0.0452309	8.19823	8.21318	8.89885	0.025654	0.0127114	0.025906	0.00636026	0.742925	1.84991	0.495493	0.245513	0.056566	7.74156	7.75397	8.44898	0.0400862	0.0175843	0.0457649	0.0088063	0.557152	2.07677	0.438662
13	2	1	1	5.82889	5.87027	7.89456	0.0386511	0.0269058	0.0277978	0.0134703	0.703115	3.09219	0.69612	0.484582	0.0971289	8.14227	8.16009	8.92937	0.0424867	0.0229161	0.039359	0.0114503	0.624296	2.64948	0.53937	0.29092	0.0961612	6.02203	6.05826	7.46104	0.0406986	0.0269386	0.0307933	0.0134911	0.910309	3.09455	0.661905	0.438119	0.105567	5.80682	5.85361	7.91515	0.0350106	0.0258731	0.0236935	0.0129398	0.812235	3.29396	0.739009
13	3	1	1	7.85495	7.86327	8.45204	0.0493638	0.0178661	0.0682785	0.00894385	0.651299	1.1861	0.361926	0.130991	0.120454	7.06437	7.13262	8.3201	0.0177745	0.017506	0.00903364	0.00876276	1.88979	3.27085	0.984893	0.970014	0.0374984	8.04946	8.06718	8.91565	0.0173205	0.00925981	0.0162055	0.00463174	0.712841	1.88239	0.534615	0.285813	0.0336562	7.85298	7.87918	8.92445	0.02738	0.0175861	0.0213151	0.00879344	0.749715	3.15937	0.642297
13	4	1	1	8.74187	8.76099	9.53669	0.0224988	0.0130229	0.0194223	0.00650725	0.910919	2.0098	0.578827	0.335041	0.0474261	8.98443	9.00106	10.414	0.0362589	0.019843	0.0331177	0.00991848	0.728551	2.32824	0.547258	0.299492	0.093324	8.82966	8.86209	9.65735	0.0225895	0.0171216	0.0149192	0.00857079	0.888063	2.7688	0.757946	0.574482	0.0460183	8.53286	8.55029	9.35851	0.0295335	0.0161273	0.0270426	0.00806384	0.930761	2.18254	0.546069
14	1	1	1	8.88198	8.89574	9.79157	0.0211975	0.0104914	0.0214207	0.00524723	0.76373	1.8405	0.494935	0.24496	0.0407234	8.10022	8.112	8.68781	0.0373103	0.016313	0.0426687	0.00815681	0.478738	1.85727	0.437225	0.191166	0.0965027	7.71971	7.72814	8.31833	0.0315908	0.0114104	0.0437905	0.00571295	0.655516	1.23524	0.361194	0.130461	0.0776534	7.80078	7.84827	9.6896	0.0296896	0.0256098	0.0172085	0.0128041	1.23202	3.37565	0.862586
14	2	1	1	8.98513	9.04727	11.0083	0.0325942	0.0345221	0.0153819	0.0172553	1.4779	4.06217	1.05915	1.12179	0.0693696	7.8751	7.88427	8.74487	0.0431369	0.016409	0.0566588	0.00819854	0.523881	1.49101	0.380395	0.1447	0.109708	7.68034	7.68558	8.05793	0.0364988	0.0103565	0.0642912	0.00517628	0.365155	1.20568	0.283748	0.080513	0.09518	6.96191	6.98007	7.94479	0.0194145	0.00977433	0.0192686	0.00488394	0.732667	1.81763	0.503454
14	3	1	1	6.71126	6.75266	7.8947	0.0193827	0.01448	0.0129746	0.00724101	1.26918	2.53796	0.747055	0.558091	0.0416437	5.83344	5.92425	7.28313	0.0300536	0.0310709	0.0145371	0.0155379	0.990024	4.26576	1.03385	1.06884	0.0741158	7.07457	7.1262	8.1519	0.0280908	0.0240678	0.0163887	0.0120306	1.13776	3.19706	0.856785	0.73408	0.0642418	6.74204	6.77817	8.01364	0.0283192	0.0198034	0.0202539	0.00990432	0.916996	2.9373	0.699291
14	4	1	1	9.979	10.0169	11.2869	0.0220349	0.019202	0.0126506	0.00960683	1.17284	3.26585	0.871436	0.7594	0.0503384	7.86407	7.88326	8.82295	0.0364127	0.0200291	0.0331247	0.0100223	0.674534	2.29984	0.550058	0.302564	0.0890204	7.53506	7.53973	7.98901	0.0345308	0.00915979	0.0651005	0.0045808	0.439421	0.971916	0.265264	0.0703651	0.0792278	7.38978	7.40308	8.30538	0.0251736	0.0111734	0.0283659	0.00558831	0.577943	1.87579	0.443856
14	1	1	1	9.91723	9.92877	10.9067	0.0330609	0.0158336	0.0345118	0.00791586	0.711793	1.74629	0.478923	0.229367	0.0776085	8.61516	8.62482	9.50769	0.0335421	0.0136982	0.0410398	0.00684469	0.524361	1.65852	0.408389	0.166782	0.0797787	7.66378	7.67242	8.4609	0.0320181	0.0116621	0.0439665	0.00583289	0.542848	1.51806	0.364234	0.132667	0.0715781	9.72356	9.74075	10.7111	0.0260691	0.0150885	0.0225608	0.0075578	1.05225	1.89706	0.578789
14	2	1	1	6.79982	6.89317	9.23908	0.0221336	0.0250364	0.00978233	0.0125164	1.49212	4.76974	1.13115	1.2795	0.0474502	7.24315	7.28785	8.36769	0.0296577	0.0239169	0.0183956	0.0119632	0.886809	3.30037	0.80643	0.65033	0.0711514	7.24072	7.30497	8.8529	0.0280088	0.0270901	0.0144794	0.0135451	1.02181	4.04788	0.967201	0.935478	0.0593796	6.1854	6.26176	7.60465	0.0227995	0.0222407	0.0116907	0.0111247	1.01259	3.93936	0.97549
14	3	1	1	7.65081	7.68292	8.78948	0.0304936	0.0214087	0.0217622	0.0107267	0.969906	2.93464	0.702073	0.492906	0.0704723	6.67148	6.71375	7.50802	0.0268309	0.0201937	0.0178334	0.0101017	0.563338	3.39266	0.752628	0.566448	0.0476658	7.66906	7.69204	8.71148	0.0321757	0.0191256	0.0270901	0.00957161	0.505783	3.00022	0.594412	0.353325	0.0747488	7.40227	7.42402	8.15818	0.0164973	0.0093735	0.0145332	0.0046918	0.924546	2.44805	0.568185
14	4	1	1	10.3331	10.3418	11.3605	0.0448047	0.0189521	0.052956	0.00947509	0.585405	1.88415	0.422994	0.178924	0.117351	7.89027	7.92062	9.4942	0.018098	0.012544	0.0130469	0.00626784	1.02705	2.35777	0.693114	0.480408	0.0395218	7.57672	7.57998	7.93037	0.0327175	0.00726753	0.0735763	0.00363037	0.348283	0.817558	0.22213	0.0493416	0.0796994	7.5308	7.53329	7.85408	0.0344345	0.00666555	0.0889527	0.00333306	0.333911	0.663861	0.193572
14	1	1	1	7.8829	7.89281	8.50794	0.0393227	0.0155601	0.0497998	0.00779772	0.533925	1.85075	0.395704	0.156581	0.099114	8.19346	8.20601	9.17846	0.0307427	0.0139568	0.0339106	0.0069891	0.472129	2.37695	0.453987	0.206104	0.0634055	6.86994	6.88525	7.78649	0.0289154	0.0132767	0.0315441	0.00665026	0.657759	2.44106	0.459156	0.210824	0.0512277	6.83684	6.84805	7.48825	0.0365682	0.014335	0.0467813	0.00718884	0.526965	1.66524	0.392007
14	2	1	1	5.01988	5.08452	6.13974	0.023642	0.0191176	0.0146118	0.00955439	1.42692	2.74642	0.808629	0.653881	0.0572345	6.61276	6.62372	7.20397	0.0356722	0.0135939	0.0468211	0.00679936	0.355148	1.63564	0.381077	0.14522	0.0860593	5.95386	6.03558	7.31472	0.025984	0.0257314	0.0131299	0.0128759	1.59295	3.39536	0.99028	0.980654	0.0581612	4.22275	4.26689	5.499	0.0358517	0.0219562	0.0292794	0.0109814	0.88817	2.55299	0.612418
14	3	1	1	4.83916	4.87064	5.88766	0.0384673	0.0212786	0.0347811	0.0106426	0.886575	2.07605	0.55316	0.305987	0.0909727	3.94269	3.97604	4.76953	0.0319833	0.0164431	0.0311273	0.00822743	0.809833	1.81175	0.514117	0.264316	0.0723041	4.96041	4.98309	6.06345	0.0352006	0.0167231	0.0370776	0.00836849	0.496314	2.19627	0.475081	0.225702	0.0925805	5.15389	5.16361	6.19597	0.0319189	0.0101108	0.0503813	0.0050553	0.260765	1.46561	0.316766
14	4	1	1	9.57398	9.71766	11.7266	0.0097972	0.01632	0.0029409	0.00816053	3.42053	4.69694	1.66578	2.77484	0.0140047	8.08216	8.08948	8.82645	0.0280437	0.00965083	0.0408245	0.00483483	0.344968	1.69882	0.344136	0.11843	0.0579429	7.95973	7.97162	8.70563	0.0197783	0.00861237	0.0227318	0.00431024	0.547658	1.70151	0.435446	0.189613	0.0392742	8.27131	8.27466	8.58926	0.0359594	0.00846247	0.0767827	0.00425238	0.301945	1.51636	0.235334
14	1	1	1	9.05096	9.07758	10.4376	0.0259727	0.0180507	0.0186924	0.00902866	1.05924	2.69539	0.69499	0.483011	0.0581555	9.04251	9.06627	10.4636	0.0285105	0.0187095	0.0217403	0.00936229	0.910529	3.11794	0.656233	0.430642	0.0650619	8.18722	8.19895	8.89728	0.0361457	0.0158525	0.0412458	0.00793343	0.762204	1.52065	0.438572	0.192345	0.0847905	8.63107	8.64217	9.39134	0.0362828	0.0158962	0.0414567	0.00795755	0.545993	1.94346	0.438119
14	2	1	1	5.08866	5.11562	6.94793	0.0267144	0.0140192	0.0254884	0.00701934	0.654598	2.97598	0.524779	0.275393	0.048049	6.37493	6.43154	8.00431	0.0237214	0.0202082	0.0139234	0.0101046	1.47172	3.11319	0.851896	0.725727	0.0526235	5.76775	5.82268	8.05147	0.0266894	0.0213065	0.016737	0.0106665	0.674966	3.38352	0.798312	0.637302	0.0592594	4.80965	4.91152	6.79563	0.0250172	0.0249092	0.0125698	0.0124614	1.00509	4.04785	0.995682
14	3	1	1	4.61404	4.63281	5.57938	0.0312192	0.0130159	0.0374705	0.00651323	0.541045	1.53009	0.41692	0.173823	0.0706373	4.31003	4.42036	6.65617	0.0276469	0.0271529	0.0140951	0.0135959	1.26875	3.38577	0.982131	0.964581	0.0611754	5.38851	5.40751	6.1712	0.0346122	0.01569	0.0381629	0.007842	0.836674	1.55499	0.453307	0.205488	0.0810246	4.93732	4.96086	5.88113	0.038845	0.0187657	0.0402116	0.00938444	0.800983	1.74019	0.483091
14	4	1	1	9.53136	9.55928	10.6923	0.0282109	0.0206085	0.0193085	0.0103041	0.952009	2.85491	0.730517	0.533655	0.0670712	8.16643	8.17238	8.72741	0.0331671	0.0103486	0.0532653	0.00518555	0.460302	1.55065	0.312015	0.0973532	0.0721883	8.17588	8.17892	8.8546	0.0402328	0.008978	0.0901001	0.00448667	0.220886	1.11038	0.223151	0.0497964	0.0985789	8.22061	8.22529	8.70079	0.0474454	0.0131708	0.0854562	0.00658532	0.517934	0.955368	0.277598
14	1	1	1	8.47099	8.48219	9.31639	0.0363208	0.0158362	0.0417223	0.0079316	0.637826	2.16444	0.43601	0.190105	0.0868625	8.91548	8.93567	10.0423	0.0237305	0.0142524	0.0197644	0.00712932	0.815433	1.92494	0.600595	0.360715	0.0456881	8.41217	8.44861	9.85934	0.0332148	0.0260516	0.0211843	0.0130322	1.35974	3.03592	0.784337	0.615184	0.0761472	7.81885	7.83481	8.82472	0.0484968	0.0242492	0.0486157	0.0121547	0.704755	3.07928	0.500016
14	2	1	1	4.52804	4.55275	5.32329	0.0248371	0.0117701	0.0262421	0.00589331	1.0173	1.54003	0.473893	0.224575	0.0653896	6.34659	6.36065	7.18855	0.053932	0.0228071	0.0638348	0.0114158	0.676614	1.55773	0.422887	0.178833	0.148195	5.07832	5.12836	6.48753	0.0391618	0.0280022	0.0273769	0.0139973	1.05677	2.92483	0.715039	0.511281	0.100517	4.05506	4.16069	5.62557	0.0314792	0.0293421	0.0168834	0.0146688	1.72021	3.10303	0.932112
14	3	1	1	4.41118	4.42271	5.13831	0.0330432	0.0105489	0.0518363	0.005283	0.366141	1.36641	0.319245	0.101917	0.0817191	4.31774	4.35739	5.76624	0.0432559	0.0253832	0.0368753	0.0126981	0.756182	2.62378	0.586815	0.344351	0.117783	5.52914	5.53952	6.20381	0.0281985	0.00956488	0.0415904	0.00478521	0.576217	1.29864	0.339199	0.115056	0.0608448	4.8054	4.84378	5.7448	0.0302741	0.018435	0.0248513	0.00921497	0.745827	2.45505	0.608937
14	4	1	1	7.73091	7.80659	9.54028	0.0202196	0.0219406	0.00932939	0.0109851	1.67857	4.51409	1.08511	1.17747	0.0316657	7.98702	8.02783	8.95145	0.0238151	0.0192665	0.0147323	0.00964208	0.884942	3.42066	0.809003	0.654486	0.0404737	7.16741	7.2369	9.10751	0.0297679	0.029803	0.0148518	0.0148868	1.33536	4.38342	1.00118	1.00236	0.0630966	7.05974	7.1071	8.3821	0.0275351	0.0225696	0.0167875	0.0112787	1.21072	3.6067	0.819666
15	1	1	1	7.66944	7.68137	8.58934	0.0336126	0.0143946	0.0393524	0.00721711	0.484532	1.94814	0.428249	0.183397	0.0743449	7.63721	7.653	8.59257	0.0299754	0.0147332	0.0305549	0.0073815	0.576491	2.33928	0.49151	0.241582	0.0625871	6.45999	6.4682	7.00288	0.0365863	0.0119221	0.0561496	0.00596232	0.619197	1.03705	0.325862	0.106186	0.0820701	6.89185	6.90755	7.834	0.0304324	0.0141733	0.032759	0.00710561	0.616779	1.7612	0.465731
15	2	1	1	7.27889	7.31158	8.51366	0.0285039	0.0196969	0.0206277	0.00984999	1.03849	2.63791	0.691023	0.477513	0.0642757	7.29245	7.33479	8.4185	0.0297092	0.0233938	0.0188692	0.0116996	1.33892	2.96195	0.787425	0.620039	0.0710549	6.64624	6.65491	7.62961	0.0334032	0.011346	0.0491648	0.00567232	0.304219	1.56735	0.339667	0.115374	0.0862855	6.49517	6.50315	6.93747	0.0364562	0.0117481	0.0566009	0.00587786	0.422378	1.31091	0.322254
15	3	1	1	5.29512	5.30676	6.06558	0.0433658	0.01524	0.0616847	0.00761821	0.458332	1.62892	0.351429	0.123502	0.12634	4.99812	5.04113	6.26108	0.0367819	0.0241783	0.0279801	0.0120902	0.878433	2.67485	0.657343	0.4321	0.0998706	6.19061	6.21164	7.12678	0.0290191	0.0148245	0.0284282	0.0074189	0.71628	2.04692	0.510852	0.26097	0.0723592	6.31772	6.33488	7.14092	0.0402391	0.0187615	0.0431545	0.00938128	0.693218	1.6657	0.466249
15	4	1	1	7.11265	7.1428	8.14893	0.0333907	0.0219047	0.0254523	0.0109534	0.949176	3.43223	0.656012	0.430352	0.06616	8.05432	8.06927	8.94676	0.0269888	0.0132611	0.0275173	0.00664354	0.588746	1.98357	0.491357	0.241431	0.0636453	6.11105	6.11743	6.83523	0.0387552	0.0108298	0.069368	0.00541679	0.385075	1.41069	0.279442	0.0780877	0.0984786	5.9407	5.95951	6.82898	0.0402509	0.0190537	0.0425276	0.00952967	0.740065	1.73083	0.473373
15	1	1	1	7.87783	7.8842	8.42056	0.0344634	0.0109273	0.054378	0.0054668	0.425031	1.27849	0.31707	0.100533	0.0863728	7.47792	7.49552	8.58297	0.0287426	0.0147658	0.0280366	0.00739927	0.785545	2.23436	0.513727	0.263915	0.0628665	6.06415	6.08719	7.58505	0.0367106	0.0194341	0.0346738	0.00971731	0.819071	2.28401	0.529386	0.280249	0.078255	6.71098	6.72671	7.4219	0.0454719	0.0209181	0.0494242	0.0104592	0.743095	1.62058	0.460022
15	2	1	1	6.67077	6.69305	7.89016	0.0323351	0.0176527	0.0296242	0.00882917	0.678066	2.36119	0.54593	0.298039	0.0765139	7.04041	7.05829	8.20302	0.0303399	0.015244	0.0302532	0.00763733	0.666824	2.02763	0.502441	0.252447	0.0669157	6.33378	6.37435	8.37728	0.0431595	0.0310075	0.0300281	0.0154992	0.751999	3.24538	0.718439	0.516155	0.116865	6.33607	6.35028	7.23359	0.0338249	0.014369	0.0398271	0.00718714	0.449849	1.9075	0.424804
15	3	1	1	5.49436	5.51452	6.52834	0.0397088	0.0187168	0.0421301	0.00936015	0.573086	2.23976	0.471352	0.222173	0.100754	5.05106	5.10713	6.54543	0.0312478	0.0235945	0.0206888	0.0117956	1.0155	2.99574	0.755077	0.570141	0.0721605	6.0222	6.04295	6.84947	0.0320014	0.0160196	0.0319734	0.00801224	0.610277	2.01109	0.50059	0.250591	0.0784865	6.23999	6.27295	7.31639	0.0365737	0.0234979	0.0284654	0.01175	0.657018	3.02765	0.642482
15	4	1	1	5.74832	5.76132	6.52123	0.0355923	0.0137757	0.046064	0.00690043	0.409646	1.65745	0.387041	0.149801	0.0895561	7.16749	7.20181	7.95026	0.0236678	0.0166292	0.0168466	0.00831647	0.555842	3.37698	0.702608	0.493658	0.0406461	5.93561	5.99838	8.05718	0.0208984	0.0180981	0.0120734	0.0090547	0.645097	3.65804	0.866007	0.749968	0.0416459	6.4901	6.51366	8.11474	0.0297132	0.0164554	0.0268366	0.00823093	0.703358	2.23443	0.55381
15	1	1	1	7.75455	7.77021	8.64988	0.0271324	0.0133838	0.0275736	0.00670926	0.868226	1.73288	0.493277	0.243322	0.062596	7.3017	7.32286	8.51805	0.0253361	0.0141035	0.0228095	0.00706788	0.895164	2.20653	0.556656	0.309866	0.0517083	6.43373	6.4382	7.25274	0.0310494	0.00745638	0.0646158	0.00372638	0.27456	1.18897	0.240145	0.0576698	0.0591381	6.67096	6.68823	7.35824	0.0314351	0.0151087	0.0327156	0.0075575	0.624648	1.71224	0.480631
15	2	1	1	6.99474	7.00227	7.61065	0.0430143	0.0139728	0.0663016	0.00699628	0.459545	1.27311	0.324841	0.105522	0.10492	7.09492	7.10797	7.83971	0.0307105	0.0132289	0.0356908	0.00662264	0.722005	1.42387	0.430762	0.185556	0.0768872	6.69082	6.7036	7.39037	0.0309557	0.0128124	0.0374241	0.00641104	0.474732	1.75103	0.413894	0.171308	0.0643379	6.35719	6.38823	8.0631	0.0335957	0.0211423	0.0267075	0.0105773	0.824391	2.63569	0.629317
15	3	1	1	5.46158	5.48051	6.05586	0.0253585	0.0115478	0.027847	0.00577469	0.830112	1.37096	0.455381	0.207372	0.0598363	4.33831	4.37513	5.98831	0.033273	0.0188553	0.0293762	0.0094336	0.593707	2.76415	0.566684	0.321131	0.0760904	6.31044	6.32138	7.05989	0.0407097	0.0151439	0.0547141	0.00757144	0.458408	1.42646	0.371997	0.138382	0.109144	5.96999	6.01825	7.41781	0.0337664	0.025697	0.022183	0.0128474	0.97747	3.36991	0.761023
15	4	1	1	6.67021	6.73046	7.68453	0.0179126	0.0161064	0.00997071	0.00806127	1.32012	2.82645	0.899164	0.808495	0.0377357	6.91089	6.95963	7.74011	0.0184703	0.0151954	0.0112322	0.00760219	0.463594	3.08723	0.822693	0.676823	0.0291877	6.22172	6.2453	7.30237	0.0339559	0.0184226	0.0312882	0.00920984	0.650265	2.12649	0.542545	0.294355	0.0806002	6.4827	6.50699	7.34273	0.0294495	0.0165537	0.0261724	0.00826949	1.0323	1.82696	0.562105
15	1	1	1	7.47253	7.48447	8.48076	0.0311741	0.0131811	0.0368879	0.00659476	0.503519	1.77968	0.422822	0.178778	0.0724893	8.04482	8.05388	8.76129	0.026274	0.0100407	0.0344595	0.00503247	0.543181	1.49257	0.382152	0.14604	0.0592806	6.56741	6.57511	7.34072	0.0347274	0.011056	0.0545105	0.00552501	0.392389	1.28279	0.318366	0.101357	0.0834779	6.69212	6.70889	7.63551	0.0452841	0.0214827	0.0477547	0.0107473	0.648522	1.94906	0.474397
15	2	1	1	6.79346	6.80921	7.81006	0.0369411	0.0171078	0.039868	0.00855055	0.668791	1.80286	0.463111	0.214472	0.0882065	7.31506	7.34081	8.51261	0.0350096	0.0215194	0.0284728	0.0107577	0.855137	2.48087	0.614673	0.377822	0.0851765	6.96502	6.97632	7.79447	0.0246749	0.00979637	0.0311107	0.00490376	0.522161	1.59673	0.397018	0.157623	0.0589818	6.45316	6.46269	7.08582	0.028915	0.0101496	0.0412942	0.00508793	0.383934	1.52657	0.351015
15	3	1	1	5.37688	5.40509	6.20433	0.0371187	0.0204896	0.0335907	0.0102353	0.879134	1.86416	0.552001	0.304705	0.0795759	5.06698	5.07915	5.6742	0.0468659	0.0164808	0.0667301	0.00825204	0.662302	1.21329	0.351658	0.123663	0.100135	5.68731	5.70275	6.33302	0.0442164	0.0185628	0.0526454	0.0092786	0.824021	1.32594	0.419818	0.176247	0.0940812	6.48829	6.49718	7.07114	0.0288225	0.00980357	0.0424522	0.00491141	0.582928	1.06873	0.340136
15	4	1	1	6.76245	6.87568	8.49567	0.0195244	0.0242765	0.00785501	0.012144	0.936841	5.30014	1.24339	1.54602	0.0350012	7.53126	7.6048	8.92489	0.0170475	0.0179959	0.00807351	0.0089968	1.77376	3.46198	1.05563	1.11436	0.0347271	6.29741	6.32425	7.26869	0.0220058	0.0128159	0.0188903	0.00640713	0.960296	1.99254	0.582388	0.339176	0.0505434	5.95364	5.9789	7.11458	0.0334133	0.0183571	0.030386	0.00917155	0.598461	2.61223	0.549395
15	1	1	1	7.8433	7.85163	8.45641	0.0349194	0.0126327	0.0483233	0.00632432	0.35052	1.85016	0.361767	0.130875	0.0765453	7.75711	7.76576	8.29419	0.0473249	0.017342	0.0646968	0.00868763	0.626721	1.48165	0.366445	0.134282	0.106231	6.37798	6.38374	6.66036	0.0268981	0.00729479	0.0496573	0.00365229	0.395977	1.16604	0.271201	0.0735499	0.0554413	6.19456	6.20061	6.8618	0.0371193	0.0101679	0.0678607	0.00509188	0.320466	1.25716	0.273924
15	2	1	1	6.63472	6.64694	7.31311	0.022351	0.0090096	0.0277406	0.00450747	0.60458	1.4393	0.403096	0.162486	0.0527473	7.01557	7.0408	7.96555	0.0289331	0.0172409	0.0242759	0.00861995	1.11908	2.00897	0.595889	0.355083	0.0680061	6.59421	6.61266	7.61312	0.0368753	0.0182163	0.037315	0.0091061	0.67092	1.86034	0.493997	0.244033	0.0909422	6.41058	6.43411	7.73379	0.0375811	0.0206715	0.0341963	0.0103463	0.830054	2.21868	0.550051
15	3	1	1	5.49642	5.50408	5.92985	0.0324312	0.00941999	0.055946	0.00472002	0.454522	1.05834	0.290461	0.0843674	0.0784444	4.70568	4.7381	5.91503	0.0303441	0.0167995	0.0274302	0.0084076	0.721705	2.26098	0.553632	0.306509	0.0738699	6.5378	6.54806	7.38386	0.0331247	0.0121449	0.0451619	0.00607095	0.513802	1.42515	0.366642	0.134426	0.0819707	5.49958	5.51263	6.40072	0.0408884	0.0155121	0.0538765	0.00775427	0.57988	1.67969	0.379377
15	4	1	1	6.8341	6.89532	8.04049	0.0196688	0.0180428	0.0107276	0.00902727	1.10495	3.50584	0.917332	0.841499	0.0355379	7.88597	7.93155	8.8879	0.0272004	0.023109	0.016035	0.0115738	0.95399	4.29228	0.84958	0.721787	0.0496773	6.43826	6.4578	7.54213	0.0368844	0.0185264	0.0367244	0.00926515	0.487967	2.16529	0.502283	0.252289	0.0926352	6.10549	6.11422	6.916	0.043205	0.0141201	0.0660714	0.00705695	0.532691	1.38009	0.326815
16	1	0	0	5.63886	5.69378	6.70417	0.0784094	0.0619357	0.0497751	0.0310569	0.727309	3.61575	0.789902	0.623945	0.206774	6.14249	6.16454	7.72811	0.0895831	0.0467181	0.0860748	0.0234096	0.500597	2.89459	0.521506	0.271968	0.229925	5.57516	5.61367	6.78825	0.0584199	0.0383941	0.0445867	0.0192581	0.827306	3.00023	0.65721	0.431924	0.144132	6.10185	6.15964	7.33688	0.0768439	0.0647669	0.0457342	0.0324884	0.643735	4.02825	0.842837
16	2	0	0	3.00601	3.0456	4.04552	0.0909449	0.0445662	0.0927805	0.0222799	0.687737	2.21688	0.490036	0.240135	0.284107	4.75698	4.80273	5.97784	0.083133	0.0550426	0.0627885	0.0275253	0.857338	2.78769	0.662103	0.438381	0.249443	4.50017	4.56597	6.08859	0.0931829	0.072047	0.060387	0.0360996	1.21513	3.10765	0.773178	0.597805	0.297378	2.26797	2.42114	4.45874	0.0758948	0.0643897	0.0446915	0.0321688	1.19946	3.40113	0.848408
16	3	0	0	4.11762	4.14761	5.22628	0.0921056	0.0459061	0.092487	0.0229747	0.617289	2.01483	0.498407	0.24841	0.291509	2.96563	2.99136	3.69636	0.0743555	0.0291422	0.0948304	0.0145669	0.555634	1.50088	0.391931	0.15361	0.225633	3.92985	3.98097	5.10804	0.0824548	0.0524905	0.0648846	0.0262949	0.93117	2.58277	0.636598	0.405256	0.238485	3.11159	3.17836	4.5793	0.0804225	0.052174	0.0618961	0.0260505	1.053	2.56989	0.648749
16	4	0	0	3.37266	3.67972	5.80599	0.0725966	0.106969	0.0246484	0.0535149	2.36095	5.25622	1.47348	2.17113	0.192234	6.64771	6.69016	7.65031	0.0606805	0.0457204	0.0404249	0.0229493	1.17817	2.54545	0.753461	0.567703	0.158512	5.77098	5.82675	7.20405	0.0737082	0.0593552	0.0457934	0.0296954	1.38991	2.679	0.805273	0.648465	0.195449	3.89497	4.2097	6.51876	0.0688539	0.110109	0.0214946	0.0549695	2.50047	5.5362	1.59917
16	1	0	0	5.7903	5.8966	8.07324	0.0379499	0.0423514	0.0169887	0.0211581	1.50685	3.85538	1.11598	1.24542	0.0883325	5.79589	5.81754	6.70032	0.0626146	0.0314372	0.0622499	0.0156919	0.649928	1.9225	0.502075	0.252079	0.177103	5.43995	5.54866	7.23922	0.0712853	0.0780072	0.0325421	0.0389686	1.80253	3.89226	1.0943	1.19748	0.208524	5.30584	5.32732	6.40791	0.108572	0.0519542	0.113634	0.0260204	0.528227	2.32756	0.478524
16	2	0	0	3.17792	3.2131	4.22166	0.0678686	0.0322146	0.0715418	0.0161187	0.616104	2.04225	0.474662	0.225304	0.217838	4.76493	4.81071	6.26576	0.0997271	0.0660976	0.0751996	0.033034	0.844364	2.7925	0.662785	0.439284	0.326836	4.6448	4.69319	5.80988	0.078232	0.0526429	0.0580788	0.0262984	1.02508	2.55499	0.672908	0.452805	0.242824	2.46019	2.55575	3.90726	0.077616	0.0537905	0.0560277	0.0269099	1.16311	2.86235	0.693033
16	3	0	0	3.92586	3.94718	4.80034	0.072972	0.0299237	0.0890398	0.0149728	0.470209	1.8476	0.410072	0.168159	0.233112	2.72228	2.76736	4.08784	0.0872169	0.0434332	0.0879396	0.0218086	0.596254	2.39507	0.497991	0.247995	0.273681	4.11142	4.1547	5.40281	0.0850613	0.0509294	0.0710143	0.0254577	0.721357	2.4316	0.598737	0.358486	0.243457	3.49715	3.56113	4.90921	0.0996165	0.0670159	0.0741426	0.0335553	0.904664	2.49724	0.672739
16	4	0	0	3.80252	3.99908	5.63595	0.0680401	0.0843531	0.027458	0.0422028	1.83889	4.34341	1.23976	1.53699	0.194503	6.37664	6.42882	7.83	0.0780788	0.0638975	0.0477291	0.0319658	1.07882	3.70973	0.818372	0.669733	0.220073	5.94893	5.99278	7.84208	0.0746559	0.0540888	0.051449	0.0270062	1.00189	2.94501	0.724509	0.524913	0.222682	4.78711	5.0436	6.76469	0.0415797	0.0661015	0.0130933	0.0330908	2.52765	5.61445	1.58975
16	1	0	0	5.3033	5.32161	6.00506	0.0871015	0.0384656	0.0987762	0.019264	0.50646	1.76276	0.441618	0.195027	0.248123	6.33759	6.40056	7.37404	0.0649204	0.0582227	0.0363125	0.0292065	1.56069	2.91215	0.896833	0.804309	0.187758	5.54505	5.56922	6.34486	0.0582196	0.0302133	0.056333	0.0151712	0.949065	2.17545	0.518954	0.269313	0.151677	5.69439	5.71296	6.67118	0.0782189	0.0360456	0.0852656	0.0181073	0.699084	1.83248	0.460829
16	2	0	0	3.09325	3.16724	4.64228	0.0951564	0.0648461	0.0699601	0.0324895	0.563898	3.08275	0.681469	0.4644	0.282091	4.69271	4.72797	5.72858	0.0980748	0.0566031	0.0849621	0.0283002	0.883569	2.14344	0.577142	0.333092	0.291526	4.45376	4.49138	5.47267	0.0723594	0.0420292	0.0623326	0.0210295	0.874904	2.22945	0.58084	0.337375	0.202075	2.65608	2.73647	4.34833	0.0749346	0.0494008	0.057068	0.0248025	0.679317	2.78965	0.659252
16	3	0	0	4.20637	4.25208	5.68563	0.0892159	0.0555295	0.0716269	0.0277485	1.02725	2.45416	0.622417	0.387403	0.258631	2.97989	2.99697	3.61268	0.0523764	0.0167516	0.0818988	0.00837758	0.495542	1.34815	0.319831	0.102292	0.128289	3.92539	3.98294	5.24873	0.0872986	0.058954	0.0646492	0.0294833	1.06261	2.47359	0.675314	0.45605	0.274836	3.61816	3.6575	4.48717	0.0913678	0.0489374	0.0853573	0.024487	0.766163	2.13466	0.535609
16	4	0	0	4.6407	4.81223	6.9116	0.0640952	0.0817161	0.0251537	0.0408852	1.67385	4.92444	1.27492	1.62541	0.179178	6.35494	6.43329	7.79059	0.0644281	0.064569	0.0321962	0.0323372	1.88094	3.6523	1.00219	1.00438	0.193618	5.77728	5.87921	8.11653	0.0789311	0.0861412	0.0361542	0.0430611	1.8702	4.21945	1.09135	1.19104	0.239217	4.45589	4.66131	6.188	0.0318348	0.0436196	0.0116229	0.021821	2.55559	4.18743	1.37019
16	1	0	0	4.74463	4.79289	6.23145	0.0967571	0.0657352	0.0712074	0.0328666	0.768417	3.14127	0.679383	0.461562	0.316461	6.54025	6.55448	7.80224	0.0781482	0.0337784	0.0906723	0.0169401	0.38185	1.81738	0.432236	0.186828	0.213521	4.58128	4.65888	6.54707	0.0614378	0.0520919	0.0362886	0.0260879	1.21714	3.17086	0.847879	0.718899	0.160302	6.12963	6.16326	7.51534	0.0585205	0.0376806	0.0455207	0.0188724	1.08695	2.29765	0.643887
16	2	0	0	3.3185	3.32674	3.78618	0.132801	0.0311472	0.283162	0.0155765	0.355105	0.893444	0.23454	0.0550092	0.350097	4.81035	4.85916	5.81868	0.105771	0.0728334	0.0771	0.0365583	0.965724	2.66503	0.688598	0.474167	0.253737	4.13343	4.2167	5.35258	0.0606081	0.0506581	0.0362706	0.0253391	1.33749	2.69418	0.835831	0.698613	0.130815	2.69096	2.74925	3.78151	0.0964585	0.0544437	0.0854018	0.027207	0.561138	2.58072	0.564426
16	3	0	0	3.83481	3.88046	4.66686	0.067656	0.040191	0.05698	0.020108	0.81786	2.26298	0.59405	0.352896	0.189239	2.6229	2.69525	4.45864	0.0656063	0.0407321	0.0528774	0.0203823	0.74341	3.17999	0.620857	0.385464	0.190589	3.95226	3.9873	5.11326	0.0891412	0.0470618	0.0844534	0.0235394	0.745848	2.08783	0.527946	0.278727	0.287873	3.7814	3.83886	5.27986	0.0698365	0.0462549	0.0527855	0.0231562	1.05739	2.84768	0.662332
16	4	0	0	4.73224	4.91953	6.71792	0.0582783	0.078444	0.0216795	0.0392785	1.8237	5.26873	1.34602	1.81178	0.162964	6.33771	6.40223	7.87349	0.0665266	0.06038	0.0366987	0.0302305	1.22688	3.55311	0.907606	0.823748	0.168056	6.00552	6.05587	7.407	0.0603526	0.0470824	0.0387449	0.0235798	1.10756	3.1397	0.780122	0.608591	0.163919	4.82882	4.92097	6.91807	0.0503002	0.0477303	0.0265542	0.0239101	1.40301	3.95996	0.948907
16	1	0	0	5.03411	5.07224	6.28288	0.103478	0.0643005	0.083425	0.0322128	0.973243	2.68879	0.621393	0.386129	0.347286	6.40407	6.45118	7.55792	0.0636481	0.0495767	0.0409859	0.0248667	1.35625	2.77089	0.778919	0.606715	0.191276	4.98645	5.04449	6.47309	0.0782699	0.0597756	0.0512663	0.0299013	1.05262	2.98661	0.763711	0.583254	0.238538	5.52588	5.55622	6.94919	0.070579	0.0409659	0.0609664	0.0205392	0.543236	2.86778	0.580426
16	2	0	0	3.13707	3.1875	5.05848	0.0836726	0.0473009	0.0740229	0.0236558	0.471556	2.83138	0.565309	0.319574	0.227642	4.61684	4.66733	6.3333	0.0868512	0.0595175	0.0633394	0.0297449	0.880881	3.32884	0.685282	0.469611	0.287218	4.76609	4.84235	6.45712	0.0606853	0.0519949	0.0353685	0.025964	1.12499	3.91069	0.856795	0.734098	0.17165	2.95171	3.14885	6.91505	0.052739	0.0578898	0.0240502	0.0289775	0.937496	5.43803	1.09767
16	3	0	0	3.77871	3.79999	4.63113	0.0816317	0.0328173	0.101663	0.0164306	0.58165	1.54789	0.402017	0.161617	0.249771	3.16481	3.19134	4.46991	0.0743392	0.0305599	0.0904962	0.0152932	0.478108	1.93582	0.411088	0.168993	0.2024	4.57673	4.664	6.10047	0.0773377	0.069529	0.0430138	0.0347661	1.50435	3.20055	0.899031	0.808256	0.217925	4.5882	4.66635	5.79008	0.0544545	0.0463598	0.0321124	0.0232749	1.36169	2.77406	0.851348
16	4	0	0	4.60448	4.7758	7.81655	0.074855	0.0950061	0.0294866	0.0474991	1.67916	5.14743	1.2692	1.61087	0.225285	6.66937	6.7579	8.27032	0.0489527	0.0534351	0.0224168	0.02671	1.91074	3.71081	1.09157	1.19152	0.131806	6.29211	6.34357	7.60242	0.0824771	0.0665849	0.0510797	0.0332916	0.824005	3.77216	0.807315	0.651757	0.220055	4.66992	4.79453	6.85223	0.0701735	0.0762983	0.0323511	0.0382448	1.71544	4.23725	1.08728
17	1	0	0	7.02885	7.0686	8.6557	0.0908149	0.0680693	0.0605945	0.0340425	1.02214	3.70914	0.749539	0.561808	0.240205	6.34118	6.39329	7.64752	0.0694459	0.0566388	0.04262	0.0283497	1.53131	2.73357	0.815582	0.665174	0.192676	7.68056	7.70774	8.7744	0.0860765	0.0557324	0.0667226	0.0279717	0.702552	2.91647	0.647475	0.419224	0.247036	7.22712	7.30172	9.21355	0.0401743	0.0418759	0.0193259	0.0209977	1.99973	3.54587	1.04236
17	2	0	0	4.78921	4.82168	6.03579	0.0925273	0.0517511	0.0827326	0.0258808	0.889601	2.1961	0.559307	0.312824	0.29024	4.4115	4.46434	5.77064	0.0682649	0.0468052	0.0497969	0.0234097	1.14412	2.43111	0.685641	0.470103	0.186195	5.6377	5.70128	7.15886	0.0714764	0.0607613	0.0421168	0.0304358	1.44859	3.32499	0.85009	0.722653	0.22525	3.72911	3.81642	5.65782	0.0915614	0.0744035	0.0562966	0.0371744	1.21042	3.19516	0.812607
17	3	0	0	5.98488	6.01223	7.29583	0.0863951	0.0495371	0.0754434	0.024803	0.856023	2.39427	0.573379	0.328763	0.274484	5.42605	5.46839	6.52356	0.0633051	0.0430384	0.0465006	0.0214928	1.01086	2.38623	0.679856	0.462204	0.182302	5.44841	5.50714	6.83731	0.0542543	0.0435645	0.0338475	0.0218234	1.42593	2.63228	0.802968	0.644757	0.144773	5.34447	5.38594	6.45095	0.0781942	0.0522133	0.058555	0.0261081	1.04836	2.38356	0.667738
17	4	0	0	5.55521	5.62618	7.17171	0.0575541	0.0513362	0.0322506	0.0256586	1.27068	3.42632	0.891965	0.795602	0.148875	6.89743	6.94614	8.06282	0.0670385	0.0551213	0.040824	0.0275998	1.3791	3.78103	0.822233	0.676067	0.183353	6.38324	6.44079	7.49575	0.067076	0.0576995	0.0389453	0.028818	1.23139	3.07232	0.860211	0.739963	0.203658	5.88749	6.03673	8.04326	0.0631856	0.0843972	0.0236364	0.0421698	1.90705	5.20782	1.3357
17	1	0	0	6.37225	6.39805	7.5516	0.0676387	0.0388706	0.0589548	0.0194703	0.868095	2.49901	0.57468	0.330258	0.180638	6.19085	6.2203	7.97173	0.0943189	0.0570767	0.0779811	0.0285568	0.767597	2.91872	0.605146	0.366201	0.280465	7.20177	7.23624	8.70482	0.0613961	0.0433598	0.043421	0.0216567	1.32796	2.67783	0.70623	0.498761	0.180463	6.4542	6.49644	8.08372	0.0862957	0.0638981	0.0582798	0.0319534	0.899862	3.12188	0.740456
17	2	0	0	4.41711	4.48261	6.15332	0.0791275	0.0604817	0.0516965	0.0302033	1.08379	3.42151	0.764358	0.584242	0.270746	4.3644	4.49942	7.50078	0.0602755	0.0660149	0.0275108	0.0329994	0.69248	4.9281	1.09522	1.19951	0.159937	5.56387	5.60005	6.88372	0.0845645	0.0538049	0.0664248	0.0268904	0.989592	2.58154	0.636259	0.404825	0.254434	3.4337	3.59903	6.27222	0.0622518	0.0672011	0.0288893	0.0336657	1.44019	4.402	1.07951
17	3	0	0	5.65818	5.71087	7.22842	0.0873364	0.0676566	0.0564068	0.0338503	1.30839	2.6491	0.774667	0.60011	0.26825	5.6321	5.65626	6.64167	0.0849573	0.0444027	0.0814963	0.0222616	0.759403	2.03122	0.522648	0.273161	0.272117	5.10751	5.17632	6.87812	0.0799555	0.067321	0.0475497	0.0337094	0.945195	3.69525	0.84198	0.708931	0.258495	4.89849	4.98329	6.29653	0.0526004	0.0481909	0.0287297	0.0241147	1.02704	3.97482	0.91617
17	4	0	0	5.32882	5.46204	7.06544	0.0677895	0.0813809	0.0282093	0.0406549	1.64121	4.56864	1.20049	1.44119	0.198451	7.42214	7.54956	9.74551	0.0344536	0.047647	0.0124682	0.0238454	2.67465	4.35553	1.38293	1.9125	0.0819532	6.69375	6.72706	8.11583	0.0736329	0.0492951	0.0550129	0.0246563	0.92807	2.70554	0.669471	0.448192	0.216108	6.04347	6.2274	8.40346	0.0330515	0.0497156	0.0109703	0.0248211	3.17462	4.52659	1.50419
17	1	0	0	6.79552	6.83163	7.79168	0.0541526	0.0380272	0.0386776	0.0190725	0.832057	2.89773	0.702222	0.493116	0.159353	6.21159	6.28668	8.4796	0.0576798	0.0559268	0.0297339	0.027954	0.937588	4.42181	0.969607	0.940138	0.155758	6.48054	6.51975	7.80812	0.0718065	0.0513196	0.0503137	0.0256996	1.18347	2.65845	0.714694	0.510787	0.214351	6.32214	6.34405	7.23129	0.0797312	0.0420396	0.0755876	0.0210141	0.803624	1.93003	0.527266
17	2	0	0	5.24495	5.30745	7.42962	0.0781411	0.0635231	0.048135	0.03181	1.23098	3.42024	0.812927	0.660851	0.226814	4.35382	4.42154	6.46306	0.0686084	0.0529456	0.0444733	0.0264852	1.27524	3.38271	0.771707	0.595532	0.175417	5.49429	5.54838	7.19379	0.0948523	0.0733818	0.0613343	0.03671	1.03163	2.98877	0.773643	0.598523	0.292665	3.53126	3.55574	4.43643	0.0746165	0.0311098	0.0893986	0.0155401	0.533238	1.66121	0.416929
17	3	0	0	5.48806	5.5351	6.60434	0.0460933	0.0332244	0.0320679	0.0166612	1.27424	2.405	0.720806	0.519561	0.129556	4.96371	4.98471	5.97492	0.0973897	0.0445624	0.106883	0.022378	0.660638	1.74571	0.457568	0.209369	0.323044	5.23832	5.29708	7.08652	0.0535294	0.042157	0.0340556	0.0211223	1.20629	3.14376	0.787548	0.620231	0.153097	3.40183	3.56025	5.93269	0.0679019	0.071379	0.0323323	0.0357284	1.23287	4.15543	1.05121
17	4	0	0	5.7347	5.79914	7.06418	0.0689518	0.05951	0.0399408	0.0297512	1.11472	3.91309	0.863066	0.744883	0.174254	6.99294	7.05922	8.61613	0.0905509	0.087485	0.0469107	0.0437878	1.41373	3.66617	0.966141	0.933429	0.273823	7.02766	7.07038	8.60988	0.0598101	0.0464686	0.0386088	0.0233053	1.01636	3.11379	0.776935	0.603628	0.158954	6.32646	6.3733	8.17152	0.0735952	0.0568241	0.0477775	0.0284832	0.901882	3.36026	0.772117
17	1	0	0	6.59812	6.63314	7.80547	0.0646179	0.0440209	0.0473776	0.021988	1.00764	2.60212	0.681249	0.464101	0.19308	6.39897	6.4534	8.50687	0.0769325	0.0643977	0.0459923	0.032226	1.2278	4.00361	0.837067	0.700681	0.216607	6.80403	6.8464	9.01126	0.0649907	0.049465	0.0426491	0.024706	1.01762	3.25883	0.761108	0.579286	0.19689	6.18284	6.23924	8.49187	0.054398	0.0455701	0.032458	0.022778	0.80507	3.76218	0.837716
17	2	0	0	4.23226	4.26822	5.13522	0.0586019	0.0324374	0.0529365	0.0162191	0.868463	2.00663	0.553522	0.306387	0.168976	3.85007	3.99831	5.8387	0.0620049	0.0669524	0.0287557	0.0335277	1.66639	4.12746	1.07979	1.16595	0.171899	5.70227	5.7604	7.45933	0.078257	0.0639454	0.0478703	0.0319624	0.90527	3.61174	0.817122	0.667688	0.253813	2.70656	2.7261	3.96734	0.0631817	0.0206092	0.0972216	0.0103443	0.321335	1.82933	0.326189
17	3	0	0	5.06453	5.0981	6.09189	0.0721779	0.0422025	0.0616818	0.0210875	0.863441	2.14776	0.5847	0.341875	0.219717	4.6866	4.73182	5.72127	0.0725978	0.047425	0.0556614	0.0237531	1.22577	2.1273	0.653256	0.426743	0.188333	5.01712	5.11457	7.60794	0.0526657	0.0523856	0.0264518	0.0261712	1.14169	4.05637	0.994682	0.989392	0.138024	3.8784	3.93926	5.3623	0.0866039	0.0597994	0.0626376	0.0298643	0.900968	2.91285	0.690493
17	4	0	0	5.72468	5.88898	8.29096	0.0308634	0.0426772	0.0111741	0.0213657	2.15251	5.08883	1.38278	1.91208	0.0717732	6.33672	6.47151	8.82911	0.0488438	0.0642437	0.0185929	0.0321653	2.26517	4.74232	1.31529	1.72998	0.125584	7.03063	7.11466	8.55641	0.0285658	0.0311755	0.0130734	0.0155713	1.56602	3.82499	1.09136	1.19106	0.0679938	5.81491	6.05346	9.19584	0.0519545	0.087509	0.0154059	0.0437065	2.89059	6.30448	1.68434
17	1	0	0	6.83302	6.85334	7.69848	0.0774517	0.0408995	0.0735767	0.020517	0.870201	2.02427	0.528064	0.278852	0.241078	6.4319	6.4418	7.03106	0.0976511	0.0349173	0.136659	0.0174729	0.532579	1.38926	0.357572	0.127858	0.314222	6.57472	6.58573	7.17605	0.0576423	0.0219701	0.0754961	0.0109674	0.708548	1.24387	0.381145	0.145271	0.148274	6.9246	6.94574	7.70426	0.0658138	0.0356773	0.0606328	0.0178179	0.615211	2.25497	0.542094
17	2	0	0	4.43561	4.48815	6.3323	0.0646984	0.0443475	0.0473235	0.0222345	0.611929	3.16532	0.685449	0.46984	0.18431	4.40458	4.448	5.94453	0.0675042	0.0418964	0.0545051	0.0209956	0.730888	2.64979	0.620649	0.385205	0.202612	5.60617	5.64777	7.1553	0.0858744	0.058821	0.0626857	0.0294108	0.955323	2.88515	0.684966	0.469178	0.270127	2.74772	2.89033	5.38185	0.0732082	0.0657165	0.0407795	0.0328603	0.942463	4.38206	0.897666
17	3	0	0	5.08097	5.154	7.99457	0.0672832	0.0582132	0.0389105	0.029127	1.18984	4.18979	0.865197	0.748566	0.194317	5.18889	5.24795	6.70893	0.0627443	0.0493002	0.0399666	0.0246744	1.01144	3.39154	0.785732	0.617375	0.201179	4.45418	4.51611	6.36878	0.0776341	0.0579068	0.0520161	0.0289396	0.806383	3.53812	0.745894	0.556358	0.256197	4.15877	4.23345	5.75723	0.0957641	0.075866	0.0605295	0.0379889	1.17979	3.15115	0.792218
17	4	0	0	5.69717	5.77658	7.44609	0.0673301	0.0643217	0.0353006	0.0322165	1.15583	5.28678	0.955318	0.912633	0.175478	7.06109	7.1373	9.42058	0.0462661	0.0481691	0.0222233	0.0240891	1.38152	4.4648	1.04113	1.08395	0.111214	6.93345	6.96966	7.93548	0.088865	0.0631114	0.0627345	0.0316418	0.883125	2.74589	0.710194	0.504376	0.253169	5.4476	5.68758	8.91567	0.0367177	0.0600735	0.011231	0.0300632	2.04963	7.00142	1.63609
18	1	0	0	6.53645	6.57659	7.50005	0.0572945	0.0416171	0.0395811	0.0208836	1.24458	3.26267	0.726372	0.527616	0.121835	7.00858	7.03256	7.98943	0.0902329	0.0524265	0.0776097	0.0261992	0.890744	2.18097	0.581013	0.337576	0.287654	6.43838	6.45258	7.31731	0.0911628	0.0390494	0.106309	0.0195058	0.669788	1.64998	0.428349	0.183482	0.284788	6.48842	6.51937	7.7758	0.0737775	0.0468667	0.0581219	0.0234542	0.600037	2.87755	0.635243
18	2	0	0	4.33109	4.35806	5.06164	0.0676982	0.0328243	0.0697822	0.0164052	0.734131	1.74625	0.484862	0.235091	0.198642	6.14253	6.20227	7.21303	0.0535272	0.0460419	0.0312173	0.023097	0.453409	3.50721	0.86016	0.739876	0.126812	6.76979	6.80829	8.57149	0.11596	0.0839697	0.0801245	0.0420136	0.881282	2.84842	0.724123	0.524354	0.345823	3.79686	3.8443	4.9329	0.0892365	0.0538137	0.0739857	0.0269059	0.587945	2.45069	0.603045
18	3	0	0	4.31715	4.34331	5.27807	0.0843617	0.040202	0.0886939	0.0201418	0.444023	2.26151	0.476544	0.227094	0.268946	4.51956	4.57448	6.04776	0.0846795	0.0599097	0.0598294	0.0299469	1.02772	2.9746	0.707488	0.500539	0.278742	4.54137	4.58291	5.93732	0.0823324	0.0507444	0.066935	0.0254266	0.821649	2.29669	0.616335	0.379869	0.244678	3.15203	3.25549	4.75745	0.0784677	0.0639638	0.0482237	0.032044	1.15759	3.1157	0.815161
18	4	0	0	5.29867	5.36903	6.50499	0.0663456	0.0575536	0.0382838	0.0288095	0.83946	4.82341	0.867482	0.752525	0.147959	6.80891	6.94948	9.89091	0.0559709	0.0779357	0.0201356	0.0390403	1.74411	5.20461	1.39243	1.93887	0.145387	7.20565	7.2534	9.12955	0.122081	0.101563	0.0733001	0.050732	1.24036	3.65014	0.831934	0.692114	0.378382	5.23245	5.30934	7.29228	0.0547989	0.0493963	0.0303547	0.0246645	0.858647	4.1473	0.901412
18	1	0	0	5.89155	5.91767	6.72401	0.0855247	0.0475553	0.0772978	0.0238991	0.853812	2.82715	0.556042	0.309183	0.233484	6.08945	6.11164	6.87887	0.0814338	0.0424207	0.0783133	0.0212511	0.686255	2.24106	0.520923	0.27136	0.239178	6.1296	6.15702	7.48291	0.0651207	0.0378355	0.0560852	0.0189326	0.810765	2.46037	0.581007	0.337569	0.195326	6.1088	6.14233	7.52419	0.0892473	0.0572647	0.0695989	0.028654	1.12653	2.43126	0.64164
18	2	0	0	4.78854	4.83992	7.17626	0.0744179	0.0523907	0.0530053	0.0262707	0.716556	3.39181	0.704006	0.495625	0.20452	5.4316	5.48769	6.69676	0.060858	0.0476713	0.0388558	0.0238415	1.41303	2.61615	0.78332	0.61359	0.16082	7.13748	7.1747	9.05986	0.0768276	0.0561296	0.052567	0.0280584	0.868169	3.29925	0.730592	0.533764	0.236222	3.76926	3.7853	4.60954	0.0789667	0.0275147	0.113641	0.0137968	0.443696	1.6327	0.348435
18	3	0	0	4.43976	4.48328	5.92278	0.0836705	0.0521969	0.0671386	0.0261286	0.943827	2.58906	0.623839	0.389175	0.26548	5.05468	5.08492	6.31868	0.105207	0.0583264	0.0951031	0.0292304	0.817899	2.29431	0.554396	0.307355	0.348614	4.03124	4.12756	5.98345	0.0701603	0.0622653	0.0395606	0.0311582	1.19644	3.85256	0.887472	0.787607	0.216325	4.05267	4.11357	5.22675	0.066572	0.0470005	0.0472113	0.0235325	0.768286	3.20214	0.706011
18	4	0	0	5.14398	5.19748	6.57081	0.102164	0.0760932	0.0686194	0.0380667	1.1936	2.82449	0.744816	0.554751	0.301954	7.09686	7.21127	10.1883	0.0731453	0.0937129	0.0285223	0.0468177	1.69288	5.09713	1.28119	1.64144	0.225025	6.87116	6.91374	7.82102	0.068064	0.0522184	0.0444035	0.0261354	0.917239	2.81292	0.767196	0.58859	0.201437	5.00657	5.10652	6.74261	0.075057	0.0755631	0.0372476	0.0377516	1.1969	3.91537	1.00674
18	1	0	0	6.31403	6.33121	7.01109	0.0709642	0.033116	0.0760949	0.0165712	0.780963	1.66979	0.466658	0.21777	0.207261	6.51576	6.54491	7.67067	0.069248	0.0427766	0.0561422	0.0214234	1.01655	2.34305	0.617731	0.381592	0.196767	6.43416	6.48603	7.77427	0.0787074	0.0645003	0.047997	0.0322334	1.37378	2.98392	0.819495	0.671572	0.236283	6.11893	6.14793	7.51369	0.071043	0.0424159	0.0595209	0.021217	0.751288	2.66539	0.597045
18	2	0	0	4.54609	4.61074	6.21827	0.0799874	0.0616059	0.0518848	0.030778	1.12139	3.2079	0.770194	0.593199	0.254586	5.49712	5.55064	7.63142	0.0912714	0.0702561	0.0593441	0.0351622	1.02529	3.38281	0.769749	0.592514	0.301116	6.47288	6.4991	7.50957	0.0673877	0.039342	0.0579486	0.0197513	0.77922	2.48573	0.583816	0.340841	0.204265	3.55511	3.61132	5.22791	0.0730695	0.046425	0.0575774	0.0232425	0.853103	2.6851	0.635354
18	3	0	0	4.18802	4.21219	5.39782	0.0798397	0.0360091	0.0885444	0.0180115	0.675383	1.92353	0.451018	0.203417	0.25183	4.90678	4.92366	5.69776	0.062198	0.0253651	0.0762971	0.012689	0.645389	1.53564	0.407812	0.166311	0.194901	3.75353	3.87222	5.83104	0.0598094	0.0569516	0.0314133	0.0284831	1.33044	3.73301	0.952219	0.90672	0.166868	3.76067	3.85474	5.67222	0.0854917	0.0724227	0.0504522	0.0362061	1.40221	3.247	0.847131
18	4	0	0	6.09177	6.1838	7.47322	0.0523775	0.0557342	0.0247065	0.0279748	1.71428	4.25111	1.06409	1.13228	0.125539	6.81372	6.84276	8.57543	0.0992866	0.0625914	0.0787472	0.0312956	0.949619	2.62607	0.630411	0.397418	0.278198	6.97042	6.98915	8.25652	0.0601945	0.0308141	0.0589098	0.0154373	0.583858	2.13378	0.511909	0.262051	0.165955	6.09238	6.17091	8.23143	0.103266	0.101455	0.05251	0.0506843	1.57911	4.04013	0.982463
18	1	0	0	6.1175	6.1362	7.15624	0.0909591	0.0435841	0.0950762	0.0218291	0.535965	2.68313	0.479161	0.229595	0.256214	5.8752	5.91488	7.70379	0.0599559	0.0410545	0.0438115	0.0205422	0.895225	2.52802	0.684745	0.468876	0.165424	6.13137	6.17162	7.65759	0.0645982	0.0455089	0.045856	0.0227587	0.982501	2.69444	0.704492	0.496309	0.167927	5.83306	5.89951	7.75369	0.0582664	0.0515064	0.0329581	0.0257542	1.27441	3.63777	0.88398
18	2	0	0	4.66173	4.73938	7.02545	0.0859726	0.0735119	0.0502822	0.0367628	0.811054	3.99829	0.855062	0.731131	0.276935	5.43657	5.48268	6.72217	0.0632592	0.0449215	0.0445934	0.0224869	1.30542	2.3186	0.710117	0.504266	0.184691	6.71558	6.74349	7.78239	0.0770589	0.0472691	0.0629097	0.0236716	0.905712	2.49073	0.613416	0.376279	0.23528	3.91382	3.99569	5.6395	0.068359	0.0550514	0.0424446	0.0275275	1.0568	3.81116	0.805327
18	3	0	0	4.66742	4.69631	5.68807	0.0580286	0.0302091	0.0557218	0.0151014	0.820808	2.10737	0.52059	0.271014	0.162976	5.38039	5.41352	6.35254	0.0600516	0.0359467	0.0501604	0.0179734	0.83611	2.68968	0.598597	0.358318	0.170602	5.28498	5.31986	6.56791	0.0628233	0.0382424	0.0515507	0.0191022	0.829066	2.27144	0.608729	0.370551	0.182934	4.61448	4.66028	5.63885	0.0621939	0.0405686	0.047628	0.0202649	1.01984	2.27119	0.652291
18	4	0	0	5.97962	6.05103	7.44115	0.0486317	0.0451358	0.02625	0.0226116	1.7515	3.82252	0.928114	0.861395	0.101579	7.31595	7.44506	10.4338	0.055384	0.0765549	0.0200417	0.0382924	1.70114	5.54946	1.38226	1.91063	0.133281	7.27187	7.29316	7.96274	0.0713989	0.039808	0.0642744	0.01998	0.872119	1.83981	0.557543	0.310854	0.198128	6.50171	6.59853	8.47368	0.058881	0.0663987	0.026068	0.0331494	1.23252	4.40278	1.12768
18	1	0	0	6.77372	6.8001	7.46308	0.0742736	0.0445043	0.0621763	0.0223235	0.891197	2.75499	0.599195	0.359035	0.200191	6.59588	6.62124	7.82104	0.058244	0.0337681	0.0501367	0.0168526	0.966686	2.11273	0.57977	0.336133	0.161815	6.39712	6.41585	7.36656	0.0918687	0.045064	0.0937011	0.022546	0.814226	1.8015	0.490527	0.240616	0.283848	6.46419	6.51995	8.20428	0.0692724	0.059013	0.0406689	0.0295147	1.12612	3.39859	0.851898
18	2	0	0	4.68694	4.72968	5.8672	0.0852859	0.0541574	0.0671434	0.0270748	1.08277	2.33395	0.63501	0.403238	0.277364	5.32818	5.36313	6.47409	0.0798464	0.048858	0.0651671	0.0244	0.857122	2.44935	0.6119	0.374422	0.263728	6.53779	6.56131	7.55747	0.089483	0.04972	0.0806735	0.0249065	0.917882	2.07403	0.555636	0.308732	0.269859	3.5579	3.61881	5.05346	0.0959973	0.0635337	0.0724997	0.0317561	0.809605	2.93057	0.661829
18	3	0	0	4.57911	4.67206	7.58251	0.0828041	0.0768503	0.0446161	0.0384307	1.164	4.54284	0.928098	0.861366	0.23035	4.80707	4.8508	6.6566	0.0573135	0.0372778	0.0440672	0.0186424	0.695017	2.93334	0.650419	0.423045	0.166037	4.06284	4.11187	5.20831	0.0807261	0.0511515	0.0637645	0.0256016	0.808152	2.87493	0.633642	0.401503	0.255627	4.05819	4.1362	5.94139	0.0629427	0.0503645	0.0393817	0.0252146	1.06724	3.05303	0.800164
18	4	0	0	6.27971	6.34264	7.87376	0.0414713	0.0370032	0.0232974	0.0185478	1.35313	4.14692	0.892261	0.796129	0.091843	7.00195	7.05352	8.91703	0.0613822	0.0523209	0.0360232	0.0261726	1.31341	3.13904	0.852378	0.726548	0.167773	7.16693	7.19291	8.42856	0.0762765	0.0466405	0.0625592	0.0233903	1.01622	2.25391	0.611466	0.373891	0.234273	5.96996	6.02815	7.66936	0.0673757	0.0563601	0.0402641	0.0281744	1.10844	4.11248	0.836505
19	1	0	0	6.75957	6.85109	8.3828	0.0607179	0.067878	0.027205	0.0339996	2.20057	3.57588	1.11793	1.24976	0.161075	7.0498	7.06751	8.13076	0.0770453	0.0385948	0.0771548	0.019361	0.611001	2.03153	0.500936	0.250937	0.219741	7.08792	7.11912	8.40536	0.109013	0.0726988	0.0816879	0.0363294	1.14275	2.52784	0.666884	0.444734	0.321609	7.82141	7.84259	8.98713	0.0725608	0.0418594	0.0631424	0.0210137	0.7593	2.19935	0.576887
19	2	0	0	4.85773	4.88464	5.86231	0.0530825	0.0272111	0.051866	0.0136293	0.679824	2.15147	0.51262	0.262779	0.127146	5.94208	5.97611	7.09247	0.0976013	0.0622319	0.0766821	0.0311751	1.03758	2.44534	0.637613	0.40655	0.286409	7.13039	7.17355	8.39932	0.0625326	0.0491905	0.0396904	0.0245605	1.33473	2.73539	0.786639	0.618801	0.156596	3.61142	3.66099	5.1786	0.0933533	0.056117	0.0778248	0.0281221	0.700031	2.75648	0.601125
19	3	0	0	4.89526	4.91982	5.72273	0.069197	0.0340136	0.070395	0.0170087	0.822798	1.66614	0.491547	0.241619	0.191266	4.48199	4.51219	5.87179	0.081347	0.0424398	0.0782026	0.0212856	0.453572	2.50231	0.521714	0.272185	0.256446	4.33513	4.36942	5.2213	0.0900489	0.0492554	0.0825684	0.0247038	0.93266	2.00982	0.546985	0.299192	0.284429	5.40151	5.41994	6.41859	0.0787552	0.0352164	0.0881813	0.0176322	0.482936	1.85764	0.447162
19	4	0	0	6.31372	6.39599	8.20584	0.0751644	0.0769432	0.0367086	0.0384667	1.62991	3.81773	1.02367	1.04789	0.216288	6.55421	6.62324	8.50412	0.102427	0.0977927	0.0537226	0.0489716	1.50504	3.72256	0.954759	0.911565	0.308841	7.29579	7.40151	9.93006	0.0604714	0.0754602	0.0242024	0.0376872	1.72679	5.0867	1.24787	1.55717	0.167119	5.72761	5.87104	8.3898	0.035719	0.046121	0.0138355	0.0230672	1.43879	5.53466	1.29122
19	1	0	0	6.80293	6.86314	8.26123	0.0486964	0.0442183	0.0268188	0.0221131	1.68763	3.15592	0.90804	0.824537	0.126244	6.67961	6.73044	8.63267	0.0944853	0.0780909	0.0572204	0.0390862	1.1026	3.68876	0.826488	0.683083	0.312221	6.7871	6.83336	7.82305	0.0530021	0.0421183	0.0333359	0.0210508	0.920333	3.15314	0.794654	0.631475	0.113845	7.76581	7.78061	8.43493	0.0780904	0.0374958	0.081771	0.0188526	0.524947	2.03876	0.480159
19	2	0	0	4.93924	4.97628	6.1521	0.0762107	0.0462252	0.0628	0.0231039	0.885664	2.51654	0.606544	0.367896	0.239267	6.22006	6.26868	7.68018	0.0700701	0.0546534	0.0449334	0.0273362	1.51019	2.60817	0.779981	0.608371	0.220405	7.3862	7.43552	8.8683	0.0656723	0.0562029	0.0383816	0.028111	0.940031	4.14137	0.855809	0.732409	0.184172	3.33794	3.4119	4.40737	0.0626593	0.0443142	0.0443982	0.0222065	1.12222	2.91671	0.707224
19	3	0	0	4.91642	4.95451	6.37311	0.0865958	0.0531498	0.0705887	0.0265916	0.725458	2.40324	0.613769	0.376712	0.253994	4.83287	4.89665	6.45992	0.0613386	0.0483663	0.0389112	0.0241931	0.884212	2.99763	0.788513	0.621753	0.184392	4.98561	5.04382	6.67214	0.0876562	0.067041	0.0573584	0.0335515	0.966367	3.59858	0.764817	0.584945	0.271443	5.83548	5.88817	7.59142	0.0789237	0.0620912	0.0502073	0.0310751	1.13709	3.31047	0.786725
19	4	0	0	5.51858	5.59073	6.9382	0.0542179	0.048607	0.0302661	0.0243259	1.42569	3.24387	0.896513	0.803735	0.129073	6.79541	6.86772	8.42939	0.068707	0.068388	0.0344948	0.0341752	1.62592	3.45608	0.995356	0.990734	0.212991	7.12461	7.23006	9.01743	0.0473682	0.0583594	0.0192115	0.0291614	1.93021	4.19094	1.23204	1.51792	0.112949	5.04574	5.10759	6.68822	0.0722773	0.0573564	0.0456495	0.0287472	0.892584	4.32745	0.79356
19	1	0	0	6.03069	6.10224	7.33696	0.0367173	0.034246	0.0196861	0.0171254	1.61784	3.7203	0.932695	0.869921	0.0699282	6.64125	6.69246	7.87656	0.0753044	0.0622902	0.0455164	0.0311435	1.43351	2.90892	0.827179	0.684225	0.228318	6.96435	7.00247	7.92817	0.0731687	0.0534439	0.0500524	0.0267036	0.746333	3.89438	0.73042	0.533513	0.177907	7.1006	7.15722	8.25776	0.0518041	0.0465961	0.0287826	0.0232863	1.70138	3.56437	0.899467
19	2	0	0	4.55344	4.60349	6.03177	0.0694029	0.0470294	0.0511913	0.023506	0.894265	3.07445	0.677629	0.459181	0.213607	6.09585	6.16663	8.4671	0.074279	0.0692641	0.0398008	0.034608	1.23783	4.0334	0.932485	0.869529	0.229968	7.21631	7.29911	9.2911	0.0711784	0.0781022	0.0324567	0.0390782	1.76276	4.04602	1.09727	1.20401	0.194804	3.06376	3.13842	4.63636	0.0556907	0.0379301	0.0408656	0.0189566	1.19509	2.50798	0.681085
19	3	0	0	4.93681	5.02552	7.15191	0.073283	0.068972	0.0389383	0.0344918	1.52298	3.53441	0.941173	0.885807	0.216289	4.85842	4.93296	6.02933	0.0577783	0.0494195	0.0338766	0.0247838	1.16268	3.08448	0.855331	0.731591	0.159471	4.73076	4.78129	5.97079	0.0755764	0.0524602	0.054491	0.026255	0.882315	2.69371	0.694135	0.481823	0.234605	5.58853	5.65674	7.34299	0.0642403	0.0563263	0.0366155	0.0281496	1.37072	3.32298	0.876806
19	4	0	0	6.26302	6.36547	9.36039	0.0596147	0.067887	0.0261721	0.0339395	1.50425	4.65165	1.13876	1.29678	0.175172	7.16508	7.23769	9.64069	0.0694668	0.0711247	0.0339669	0.0356076	1.07219	4.66317	1.02387	1.0483	0.186755	7.70837	7.74519	9.21851	0.0984364	0.0743343	0.0653039	0.0372397	1.12648	3.74225	0.755151	0.570253	0.289728	5.87834	5.97828	7.33041	0.0399134	0.0434982	0.0183329	0.0217739	1.73629	4.38013	1.08981
19	1	0	0	6.38337	6.419	7.67187	0.0722753	0.0488674	0.0536528	0.0245274	0.665582	3.05194	0.676129	0.45715	0.207237	6.11352	6.15652	7.32408	0.0646209	0.0469848	0.0444716	0.0235099	1.24269	2.56956	0.727083	0.52865	0.176282	6.51785	6.55209	7.60153	0.0544327	0.03645	0.0406519	0.0182287	1.22183	2.18718	0.669634	0.44841	0.152663	7.3166	7.35254	8.91208	0.075858	0.0551299	0.0522082	0.0275746	1.16514	3.32808	0.726751
19	2	0	0	4.81667	4.86237	5.96672	0.0782056	0.0520591	0.0587548	0.0260352	1.01908	2.7739	0.665669	0.443115	0.244387	5.84494	5.886	7.09429	0.0882732	0.0613149	0.0635324	0.0306528	1.12427	2.77027	0.694604	0.482475	0.269672	6.93047	6.98995	8.69481	0.0725906	0.0661134	0.0398791	0.0330799	1.34497	3.50694	0.910771	0.829504	0.224414	3.37257	3.55332	6.29996	0.0492065	0.055106	0.0219984	0.0275894	1.46299	4.44245	1.11989
19	3	0	0	4.71507	4.84955	7.49676	0.0433189	0.0491768	0.0190689	0.024575	1.35709	4.30314	1.13523	1.28874	0.114804	4.41552	4.49941	6.29643	0.0594294	0.0514445	0.0343458	0.0257365	1.16338	3.17376	0.865641	0.749334	0.164484	4.80675	4.87594	6.52353	0.0649259	0.053193	0.0396406	0.0266081	1.1846	3.54653	0.819287	0.671232	0.201203	5.31776	5.38308	6.91529	0.0645686	0.0540315	0.0385307	0.026981	1.22968	3.2876	0.836807
19	4	0	0	6.21886	6.24431	7.64691	0.0829516	0.0467647	0.0737117	0.0234274	0.819429	2.35228	0.563759	0.317825	0.258167	6.69874	6.77166	8.16405	0.0335992	0.0333405	0.0169259	0.0166663	1.96399	3.40499	0.992303	0.984664	0.0611451	7.10509	7.1586	8.82572	0.0738608	0.0646033	0.042181	0.0322699	0.887359	3.62605	0.874663	0.765035	0.222005	6.06322	6.18939	8.13471	0.0724218	0.0901518	0.0290549	0.0450226	1.49908	5.15451	1.24482
19	1	0	0	6.56137	6.60761	7.64492	0.0483583	0.0377823	0.0310813	0.0189729	1.43205	2.54635	0.781299	0.610428	0.12488	6.4803	6.52791	7.43738	0.0661001	0.0520839	0.0418844	0.0260049	1.04591	2.77432	0.787955	0.620873	0.195407	6.78559	6.81954	7.89929	0.0660406	0.0449349	0.0484916	0.0224498	1.09309	2.60163	0.680413	0.462962	0.179947	7.71804	7.74326	8.67743	0.0667218	0.0417144	0.0534889	0.0209074	0.8483	3.03721	0.625199
19	2	0	0	4.6232	4.71686	6.72989	0.0545124	0.0510318	0.0291734	0.025567	0.687537	4.29748	0.936151	0.876379	0.138385	5.52117	5.56271	6.71121	0.0919833	0.0624711	0.0676805	0.0312179	1.13174	2.43659	0.679157	0.461254	0.288291	6.541	6.61628	8.53741	0.0467525	0.04657	0.0235283	0.0233449	1.60216	3.6554	0.996095	0.992205	0.117852	3.60681	3.70083	5.50677	0.072401	0.0600656	0.0435818	0.0299963	1.39649	3.14788	0.829624
19	3	0	0	5.86693	5.91823	7.36333	0.102163	0.0795314	0.0656501	0.0397856	1.33114	3.04127	0.778476	0.606025	0.311642	4.78517	4.80751	5.63038	0.09242	0.0428389	0.0995739	0.0213939	0.615879	1.9138	0.463524	0.214855	0.274144	4.48249	4.56562	5.88731	0.0683533	0.0593526	0.0392954	0.029628	1.03092	3.49474	0.868321	0.753982	0.21206	4.97415	5.05349	7.09847	0.0896764	0.0800851	0.0503139	0.0401269	1.25604	3.51794	0.893046
19	4	0	0	5.91679	5.99825	7.31766	0.0556605	0.0548855	0.0282597	0.0274781	1.06275	4.26528	0.986076	0.972345	0.134522	6.21461	6.25772	7.47468	0.0718067	0.0527014	0.0489389	0.0263614	1.1514	2.78735	0.733934	0.538659	0.209294	7.3569	7.41311	9.75294	0.0650309	0.0593047	0.0357198	0.0297062	1.2221	4.33402	0.911946	0.831646	0.176369	5.44105	5.66926	7.9471	0.0423579	0.0675083	0.0133136	0.0338176	1.87881	6.86559	1.59376
20	1	0	0	6.73098	6.76658	7.74792	0.0746373	0.0518014	0.0537912	0.0259109	1.20277	2.39166	0.694042	0.481694	0.225253	5.77138	5.80437	6.80411	0.0824307	0.0510018	0.0665729	0.0254853	0.916773	2.66497	0.618723	0.382818	0.249048	6.80937	6.82707	7.68076	0.0740378	0.0364218	0.0751915	0.0181963	0.755015	1.91304	0.491935	0.242	0.207667	6.08663	6.12263	7.74161	0.0992365	0.0658729	0.074758	0.0329404	0.87736	3.03709	0.663798
20	2	0	0	4.21577	4.2539	5.57505	0.0742589	0.0422541	0.0653107	0.0211459	0.771408	2.07388	0.569011	0.323774	0.216192	6.40693	6.43097	7.56148	0.0660314	0.0367242	0.0593119	0.0183462	0.901508	1.90388	0.556163	0.309317	0.181526	4.92399	4.94869	5.94287	0.0762845	0.0377163	0.0773705	0.018913	0.80731	1.9946	0.494416	0.244447	0.217346	3.45921	3.47437	4.0543	0.0748233	0.0242883	0.115229	0.0121418	0.421332	1.23142	0.324609
20	3	0	0	4.3658	4.41596	5.70282	0.0587645	0.0390445	0.0443499	0.0195786	0.722936	2.77279	0.664423	0.441458	0.158175	5.9825	6.00116	6.91026	0.0799844	0.0378618	0.0847617	0.0189929	0.645932	1.76145	0.473364	0.224074	0.251725	4.23265	4.28184	5.40218	0.0479283	0.0310556	0.0369833	0.0155274	1.13097	2.27167	0.647958	0.41985	0.125645	5.16342	5.21512	6.65671	0.0779267	0.0571479	0.0532037	0.0286134	0.666539	3.43099	0.733355
20	4	0	0	5.9849	6.13561	7.97339	0.0557077	0.0753821	0.0205592	0.0376454	2.29159	4.56293	1.35317	1.83108	0.148626	7.67317	7.72899	9.33903	0.0873415	0.0810798	0.0470558	0.0405505	1.20629	3.7747	0.928307	0.861754	0.292983	6.7472	6.85969	8.29652	0.0607397	0.0752393	0.024552	0.0376731	2.08659	3.90491	1.23872	1.53442	0.156628	6.41083	6.50056	8.07879	0.0521554	0.0562035	0.0242203	0.028126	1.91686	4.05675	1.07762
20	1	0	0	5.72303	5.76278	7.54483	0.07692	0.0520296	0.0569641	0.026063	0.789634	2.95414	0.676412	0.457533	0.227709	5.79334	5.81846	7.09445	0.0996343	0.0538594	0.0921569	0.0269298	0.805124	2.70716	0.540571	0.292217	0.3093	7.43142	7.44731	8.77368	0.0699917	0.0340732	0.071913	0.0170428	0.575279	2.13961	0.486818	0.236992	0.210753	5.92568	5.96202	6.94464	0.0897787	0.0590724	0.0681603	0.029509	0.904552	2.85691	0.657979
20	2	0	0	4.84923	4.89975	6.16819	0.0804375	0.0565267	0.0571526	0.0282244	1.30211	2.20804	0.70274	0.493843	0.221775	6.78531	6.83862	8.36551	0.0861523	0.0735211	0.0504472	0.036739	1.34577	3.18238	0.853385	0.728266	0.264196	4.64227	4.67887	6.31573	0.0851601	0.0498054	0.0730954	0.0250017	0.623067	2.4624	0.584844	0.342043	0.230638	3.88742	4.05609	6.0842	0.0674136	0.0781376	0.0290743	0.0390603	1.88701	4.05895	1.15908
20	3	0	0	4.55785	4.5934	5.5815	0.0689265	0.0393649	0.060364	0.019689	0.892579	2.06711	0.571114	0.326171	0.173332	5.56295	5.59087	6.43489	0.0890182	0.0497417	0.0797274	0.0248938	0.915001	1.89639	0.558781	0.312237	0.256709	4.14434	4.18942	5.55642	0.0793308	0.0486903	0.0646706	0.0243617	0.826185	2.91301	0.613763	0.376705	0.229526	4.60519	4.67994	6.78642	0.0637727	0.053198	0.0381805	0.0265682	1.10822	3.22514	0.834181
20	4	0	0	5.90239	5.98685	7.41774	0.0582426	0.0584301	0.0290453	0.0292327	1.30228	3.68906	1.00322	1.00645	0.163491	7.42311	7.50661	9.32259	0.0546688	0.0611072	0.0245204	0.0306361	1.58378	4.03405	1.11777	1.24941	0.157432	7.13323	7.21258	9.02988	0.0651339	0.0695688	0.0305822	0.0348887	1.72753	3.7485	1.06809	1.14082	0.180016	6.38759	6.48188	8.06807	0.055045	0.0607029	0.0249535	0.0303468	2.06619	3.33541	1.10279
20	1	0	0	6.25173	6.26964	7.10085	0.078605	0.0372591	0.0830177	0.0186524	0.711963	1.88982	0.474004	0.22468	0.229142	5.92303	5.95996	7.41122	0.0816209	0.0541342	0.0614954	0.027051	0.559255	2.89374	0.663239	0.439886	0.245216	7.02199	7.04512	7.917	0.0829494	0.0473727	0.0726979	0.0237111	0.930583	2.18985	0.571104	0.32616	0.236418	6.82169	6.85	8.56264	0.066935	0.0416903	0.0538005	0.0208713	0.777848	2.69889	0.622848
20	2	0	0	3.81241	3.8545	4.8594	0.0815698	0.0463992	0.0716869	0.0231954	0.778631	2.30027	0.568828	0.323566	0.253182	5.89776	5.94987	8.0939	0.0915621	0.0720291	0.0581472	0.0359843	0.99536	3.50224	0.78667	0.618849	0.274801	4.96004	5.01548	6.61902	0.0595888	0.04437	0.0400673	0.0222147	1.18367	2.49703	0.744603	0.554433	0.152535	3.36945	3.45991	5.2419	0.109547	0.0862126	0.0697349	0.0431911	1.17132	3.39075	0.786995
20	3	0	0	4.34416	4.40923	5.74175	0.0672461	0.0508138	0.0444568	0.0253844	1.15747	3.03736	0.755639	0.570991	0.183783	5.53324	5.56871	6.68307	0.0636093	0.0399668	0.0505922	0.0199728	0.830616	2.4848	0.628316	0.394781	0.170505	3.49213	3.57539	4.96858	0.0769293	0.0590885	0.0501726	0.0295998	1.23844	2.76994	0.768088	0.589959	0.216315	4.5597	4.62433	6.19528	0.0857143	0.066118	0.0555738	0.0330676	1.16191	2.84654	0.771376
20	4	0	0	6.74962	6.86718	9.96899	0.0418629	0.0530195	0.0165372	0.0265262	2.01883	5.34072	1.2665	1.60403	0.0876956	7.47593	7.53877	9.45017	0.077056	0.0749278	0.0396539	0.0374938	1.33772	4.08161	0.972381	0.945525	0.234834	7.49015	7.55239	9.09872	0.0440713	0.0426861	0.022798	0.0213874	1.48682	4.1788	0.968569	0.938127	0.0988895	6.71968	6.78707	8.7882	0.078218	0.074702	0.0409671	0.0373668	1.1752	4.52751	0.955048
20	1	0	0	6.15495	6.18951	7.19437	0.0590162	0.0386029	0.0451459	0.0193159	1.03033	2.06033	0.654106	0.427854	0.151273	5.92484	6.01577	8.15247	0.0798435	0.0833169	0.0383563	0.041766	1.60566	3.87775	1.0435	1.0889	0.222863	6.56071	6.5814	7.94947	0.0916965	0.047889	0.0878807	0.0239695	0.572126	2.0844	0.522255	0.272751	0.255532	6.74638	6.77335	8.19646	0.0548523	0.0331725	0.0455344	0.0166535	0.556589	2.2807	0.604761
20	2	0	0	4.23583	4.27801	5.61737	0.065046	0.0390297	0.0541477	0.0194953	0.708724	2.51525	0.600033	0.360039	0.206004	6.41501	6.44058	7.69269	0.0749947	0.0430479	0.0652814	0.0215096	0.879539	2.31978	0.574013	0.329491	0.235149	4.66654	4.74981	6.38198	0.066029	0.0585378	0.0372264	0.0292586	1.18811	3.47859	0.886546	0.785964	0.189659	3.94079	4.02581	5.31091	0.0555492	0.0457718	0.0336939	0.0228766	1.30927	3.06813	0.823987
20	3	0	0	4.88596	4.91106	6.33832	0.0972612	0.0482763	0.0982874	0.0242151	0.415378	2.40012	0.496357	0.246371	0.297091	5.4416	5.46417	6.15865	0.0588151	0.0292102	0.059508	0.014678	0.595185	1.77435	0.496644	0.246655	0.173111	3.89394	3.97846	5.76532	0.0730212	0.0596318	0.0447083	0.0298158	1.33683	3.12007	0.816638	0.666897	0.208045	4.77714	4.8694	7.66071	0.0577474	0.054537	0.0305869	0.0272806	0.730516	4.17508	0.944407
20	4	0	0	6.4877	6.58854	8.80685	0.0795541	0.0914441	0.0346079	0.0457257	1.89757	4.19679	1.14946	1.32125	0.243081	7.61782	7.67679	9.72458	0.0849765	0.0807819	0.0447607	0.0404508	1.25821	4.39191	0.950638	0.903712	0.284136	6.36276	6.40254	7.78564	0.0837986	0.059771	0.0588034	0.0299164	0.962452	2.71626	0.713269	0.508753	0.264545	7.01043	7.06504	8.57922	0.0512337	0.0449606	0.02921	0.0224949	0.774421	4.50454	0.877559
20	1	0	0	5.84592	5.85637	6.61972	0.043364	0.0151809	0.0621574	0.00761784	0.410771	1.33306	0.350082	0.122557	0.103968	5.95289	5.98805	6.77268	0.0509789	0.0330701	0.0393298	0.0165505	0.979862	2.39532	0.648701	0.420813	0.121045	6.7389	6.78871	7.93172	0.0671212	0.0551565	0.0408244	0.0275674	0.962107	3.42714	0.821746	0.675266	0.186656	7.01811	7.03784	8.18856	0.0685736	0.036153	0.0650045	0.0180683	0.851445	2.25521	0.527214
20	2	0	0	4.76805	4.79458	5.55355	0.0930786	0.0470164	0.0921182	0.0235042	1.00218	1.48019	0.505127	0.255153	0.23758	5.88827	5.90307	6.67464	0.0890235	0.0373084	0.106217	0.0186551	0.581504	1.67348	0.419085	0.175632	0.195649	4.84279	4.87297	5.59018	0.131224	0.0712688	0.12083	0.035641	1.00908	1.74664	0.543109	0.294968	0.310835	3.89074	3.89704	4.73665	0.102346	0.0227282	0.234254	0.0115525	0.276262	1.0972	0.222072
20	3	0	0	4.87897	4.91936	5.68955	0.100903	0.0635637	0.0802404	0.031842	0.791821	2.33605	0.629946	0.396832	0.291772	5.02292	5.05513	6.02653	0.0870386	0.049661	0.0761966	0.0248052	0.82796	2.27165	0.570563	0.325542	0.265317	4.09908	4.14972	5.19811	0.123065	0.0796579	0.0953692	0.0399573	1.02962	2.63855	0.647283	0.418975	0.357417	4.18118	4.25828	5.90183	0.105651	0.0853432	0.0654332	0.0426962	1.2061	3.26988	0.807784
20	4	0	0	5.9205	5.97275	7.80886	0.0659066	0.0520086	0.0417775	0.0260156	1.14521	3.69503	0.789125	0.622719	0.186004	7.46	7.5052	8.92977	0.0531598	0.0437679	0.0323297	0.0219152	1.2428	2.96457	0.823327	0.677867	0.148143	7.07517	7.1523	8.27029	0.046675	0.0489459	0.022241	0.0244577	1.55461	3.33585	1.04865	1.09967	0.131326	5.88799	5.97981	7.8287	0.0423835	0.0442912	0.0203631	0.0222374	1.28021	4.37532	1.04501
21	1	0	0	6.83619	6.89344	8.6065	0.061232	0.054366	0.0344752	0.0271772	1.42035	3.04537	0.88787	0.788313	0.166884	6.77514	6.82764	7.78774	0.112075	0.0948474	0.0662293	0.0474335	1.10547	3.17334	0.846287	0.716201	0.301432	7.39217	7.39916	7.93193	0.0744883	0.0239885	0.115721	0.0120016	0.53271	1.13154	0.322043	0.103712	0.209312	7.37159	7.39688	8.36885	0.0717108	0.0438881	0.0586434	0.0219656	0.975506	2.48141	0.612015
21	2	0	0	4.64993	4.71058	6.36977	0.0753681	0.0568557	0.0500136	0.0284617	0.85065	3.37691	0.754373	0.569079	0.250797	4.97289	5.02885	6.136	0.0643256	0.0481799	0.0429601	0.0241007	1.04122	2.74708	0.749001	0.561002	0.184362	6.24145	6.27477	7.36057	0.0622537	0.0402548	0.0481906	0.0201496	0.983086	2.40492	0.646625	0.418123	0.176406	3.62133	3.65398	4.65819	0.0642937	0.0313716	0.0660899	0.0157352	0.704775	1.87942	0.487942
21	3	0	0	4.53566	4.57379	6.06893	0.0660204	0.0389573	0.0560812	0.0195271	0.598198	2.61901	0.59008	0.348194	0.209787	5.30533	5.35887	7.13056	0.0857015	0.0648358	0.0565887	0.0323878	1.04589	2.87534	0.75653	0.572337	0.257657	5.08229	5.1463	6.30111	0.0756047	0.0612478	0.0466281	0.0306007	1.09112	3.10115	0.810106	0.656271	0.240119	5.66897	5.68765	6.46247	0.0976924	0.0450485	0.105913	0.022521	0.815644	1.66818	0.461126
21	4	0	0	5.73767	5.80831	7.26462	0.0634293	0.0573547	0.035064	0.0286695	1.71399	3.31846	0.904231	0.817633	0.192799	7.08029	7.12912	8.81665	0.0679258	0.0566485	0.040743	0.0283375	1.154	3.30404	0.833977	0.695517	0.186779	6.5738	6.6243	8.29828	0.0673007	0.0550081	0.0411057	0.027461	1.27699	2.82106	0.817349	0.668059	0.197816	7.3528	7.40508	8.78765	0.0790808	0.069544	0.0450521	0.0348411	1.40308	3.19237	0.879404
21	1	0	0	6.37535	6.40798	7.52406	0.0954295	0.0617082	0.0739159	0.0309071	1.00124	2.51831	0.646637	0.418139	0.290932	6.24546	6.2812	7.69516	0.084851	0.0568417	0.0633693	0.028438	1.01543	2.68044	0.6699	0.448766	0.268312	7.69276	7.73764	9.18751	0.048962	0.0407928	0.0293785	0.0203929	1.45704	2.86303	0.833153	0.694143	0.118863	6.63209	6.69202	8.07559	0.0629858	0.056354	0.0351887	0.0281687	1.27095	3.00318	0.894709
21	2	0	0	4.70242	4.71984	5.45658	0.0686517	0.0278417	0.0846679	0.0139254	0.469064	1.8591	0.40555	0.16447	0.190801	5.45069	5.50549	7.14423	0.106502	0.0826131	0.0687286	0.0413541	0.904723	3.69623	0.775694	0.601701	0.34442	5.78072	5.81423	6.86025	0.0542052	0.0338244	0.0436037	0.0169786	0.857912	2.39424	0.624006	0.389384	0.157626	3.64257	3.72443	5.54387	0.0640102	0.0497611	0.0411643	0.0248772	0.894848	3.23408	0.777393
21	3	0	0	5.10895	5.18125	6.56353	0.0665769	0.0574785	0.0385513	0.0287344	1.35768	3.13712	0.863339	0.745354	0.187329	5.62464	5.70543	7.57629	0.0711941	0.0681812	0.0371519	0.0340739	1.38272	3.55654	0.95768	0.91715	0.210335	5.86794	5.94068	7.94385	0.0862705	0.0800347	0.0464979	0.0400189	1.37161	4.04444	0.927718	0.860661	0.277882	5.5931	5.62261	7.61258	0.0740545	0.04264	0.0642919	0.0213151	0.771384	3.01661	0.575792
21	4	0	0	6.74613	6.8111	8.04374	0.0800897	0.0752462	0.0427986	0.0377785	1.39707	3.45379	0.939524	0.882705	0.242321	6.99966	7.04682	8.43246	0.0624839	0.0509076	0.0383133	0.0254318	1.15414	3.16465	0.814731	0.663786	0.170205	6.63091	6.7123	8.42172	0.0680962	0.0710365	0.0326202	0.035498	1.85483	3.50015	1.04318	1.08822	0.199898	6.51923	6.57219	8.39395	0.0511013	0.0425969	0.030628	0.0212819	1.19184	3.49279	0.833578
21	1	0	0	5.9465	5.96803	7.17734	0.0731687	0.0371044	0.0720911	0.0185388	0.490296	2.21752	0.507108	0.257159	0.206857	5.70668	5.72711	6.59967	0.0895161	0.0433252	0.0927626	0.0217296	0.74377	1.7329	0.483993	0.23425	0.277839	6.63853	6.65061	7.63547	0.0744982	0.0298806	0.0929198	0.0149484	0.539406	1.73786	0.401091	0.160874	0.222977	6.08303	6.13116	7.72168	0.0472971	0.0363106	0.0308016	0.0181539	0.856007	2.89197	0.767713
21	2	0	0	4.51728	4.54133	5.55793	0.0641572	0.0299761	0.0687171	0.0150012	0.672327	1.84767	0.46723	0.218303	0.187372	4.80188	4.84738	6.29469	0.083867	0.0556292	0.0631852	0.0277996	0.86954	2.66579	0.663303	0.43997	0.275804	4.87554	4.93768	6.40336	0.0793094	0.0619989	0.0507095	0.0309891	1.0092	3.27133	0.781735	0.611109	0.255613	3.19538	3.27162	4.66609	0.0673197	0.0473188	0.0478569	0.0236443	0.771199	2.69046	0.702896
21	3	0	0	4.70943	4.76433	6.28737	0.0872589	0.0629968	0.0604005	0.0314817	1.08696	3.04055	0.721953	0.521216	0.273914	4.72191	4.76058	5.91659	0.0519278	0.0314797	0.042791	0.0157258	0.85534	2.53505	0.60622	0.367502	0.141889	5.27558	5.32247	6.9957	0.0685023	0.0483463	0.0485588	0.0241871	0.904881	2.79623	0.705761	0.498099	0.203321	4.88362	4.93057	6.37333	0.082709	0.0562072	0.0607947	0.0280766	0.877691	2.74322	0.679578
21	4	0	0	6.03242	6.07759	7.3751	0.0931977	0.0690024	0.0630533	0.0345641	1.22163	2.60947	0.740387	0.548173	0.297754	6.62711	6.67178	8.56098	0.0662174	0.051094	0.0429294	0.0255594	1.07112	3.1665	0.77161	0.595382	0.194238	6.31257	6.35057	7.81604	0.0571577	0.0396902	0.0412425	0.0198867	0.913285	3.19751	0.694399	0.48219	0.140093	5.91865	5.97883	7.29413	0.0762981	0.0646321	0.0451248	0.0323806	1.32062	3.20648	0.8471
21	1	0	0	5.86249	5.88916	6.9661	0.0739511	0.0414557	0.0659155	0.0207141	0.890411	2.0619	0.560583	0.314253	0.231635	5.31316	5.35123	6.82297	0.0583491	0.0372331	0.0456909	0.0186045	0.94159	2.20825	0.638109	0.407183	0.16177	6.71264	6.75669	8.77836	0.0923472	0.0712364	0.0598336	0.0356042	0.979848	3.29413	0.771397	0.595053	0.26302	6.06619	6.12211	7.64222	0.0788487	0.0651874	0.0477676	0.0326491	1.29951	3.07225	0.82674
21	2	0	0	4.33915	4.36904	6.16954	0.0731181	0.0373341	0.0715923	0.018665	0.50102	2.814	0.5106	0.260713	0.207022	4.57633	4.6	5.42516	0.0804304	0.0375212	0.086205	0.0187605	0.676423	1.94034	0.466504	0.217626	0.256254	5.18182	5.24091	6.59334	0.0737703	0.0579483	0.0469268	0.028956	1.19495	2.85435	0.785522	0.617045	0.217749	3.35958	3.47091	5.15031	0.0437898	0.0382218	0.0250994	0.0191223	1.00291	3.23338	0.872849
21	3	0	0	4.91315	4.95691	6.9517	0.0654303	0.0430581	0.0498051	0.0215687	0.415214	3.41557	0.658076	0.433063	0.173934	5.11188	5.13561	5.84228	0.0735857	0.0363367	0.0746754	0.0182089	0.482464	3.01551	0.493802	0.24384	0.17928	5.96734	6.05307	7.68679	0.0962806	0.0978716	0.0472872	0.0488629	1.54263	3.63373	1.01652	1.03332	0.296924	5.35824	5.39558	6.43555	0.0804579	0.0510514	0.0633968	0.0255238	0.943365	2.5334	0.634511
21	4	0	0	6.53956	6.65235	8.85822	0.0495537	0.060509	0.0203391	0.0303264	1.86581	4.43341	1.22108	1.49104	0.13438	6.73607	6.77203	7.88102	0.0689388	0.0480972	0.0495699	0.0241284	0.80286	2.89311	0.697679	0.486756	0.201301	7.60829	7.67022	8.77425	0.05348	0.0520758	0.0274642	0.026041	1.34399	3.88174	0.973744	0.948177	0.133299	6.97649	7.05314	8.85602	0.0536487	0.055694	0.0258446	0.0278526	1.63437	4.11969	1.03812
21	1	0	0	6.19456	6.23812	7.77335	0.0747211	0.0550494	0.0506876	0.0275119	0.992355	3.23968	0.736732	0.542774	0.244575	6.50384	6.54051	8.12819	0.080654	0.0558412	0.0582328	0.0279142	1.05183	2.86375	0.692355	0.479355	0.250636	7.5857	7.61299	8.68938	0.0649994	0.0418984	0.0503797	0.020933	1.21569	2.07839	0.644597	0.415505	0.195895	6.57728	6.61197	7.60573	0.0708374	0.0479653	0.0522903	0.0239745	1.05708	2.62072	0.677117
21	2	0	0	4.40378	4.44312	5.68352	0.0914069	0.0539959	0.0774085	0.0270117	0.709788	2.23708	0.59072	0.348951	0.274705	4.81632	4.84056	5.75216	0.062966	0.0305056	0.0650607	0.0152709	0.56781	1.83616	0.484477	0.234718	0.154914	4.87008	4.94152	6.18578	0.0463546	0.038861	0.0276513	0.0194338	1.64538	2.7626	0.838342	0.702817	0.106031	4.08978	4.18493	5.68685	0.110663	0.0983297	0.0622757	0.0491685	1.35033	4.14955	0.888554
21	3	0	0	4.59632	4.64642	6.18253	0.0839867	0.0572058	0.0616238	0.0285895	0.950284	2.90761	0.681129	0.463936	0.260087	4.98249	5.05193	6.47231	0.0803479	0.0671315	0.0481221	0.0335929	1.29644	3.04274	0.83551	0.698076	0.242952	5.48757	5.5414	7.88589	0.0786525	0.0606547	0.051089	0.030383	1.0627	3.6126	0.771173	0.594707	0.221223	5.87919	5.92875	7.49162	0.0700684	0.05365	0.0458166	0.0268607	1.09696	3.0974	0.76568
21	4	0	0	6.29894	6.35013	7.8083	0.0800507	0.0644932	0.0498626	0.0323648	1.24306	3.08324	0.805655	0.649079	0.220912	7.89006	7.91777	8.99416	0.079865	0.0529213	0.0603477	0.0264977	1.00406	2.35521	0.662634	0.439083	0.241538	7.27431	7.35146	9.3514	0.0687565	0.0731219	0.0322862	0.0365161	1.56109	3.67275	1.06349	1.13101	0.190216	7.03065	7.08955	8.43802	0.0575201	0.0525167	0.0315243	0.0262785	1.26808	3.534	0.913015
22	1	0	0	6.20138	6.21298	7.58708	0.0845749	0.0321255	0.111626	0.0161057	0.434128	2.17256	0.379846	0.144283	0.219485	6.55007	6.57673	7.96715	0.0834353	0.0494169	0.0705214	0.0247385	0.741433	2.4898	0.592279	0.350794	0.268207	6.78074	6.84477	8.46489	0.0422865	0.0395413	0.0226581	0.0198117	1.62983	3.48294	0.935081	0.874376	0.0922108	6.74912	6.79471	8.35617	0.0749901	0.0589927	0.0476672	0.0294991	0.71123	3.51464	0.786673
22	2	0	0	4.07353	4.18318	6.69125	0.0566084	0.0539225	0.0296946	0.0269436	0.73441	3.95386	0.952553	0.907357	0.149834	5.31589	5.43503	8.37636	0.11861	0.134383	0.0523596	0.0672108	1.69415	4.96484	1.13298	1.28364	0.330556	6.56699	6.59029	7.78306	0.0765897	0.0424506	0.0691617	0.0212467	0.720554	2.54097	0.55426	0.307204	0.237991	2.91232	3.00695	5.01522	0.0734908	0.0550623	0.0490236	0.0275199	0.842567	3.37532	0.74924
22	3	0	0	4.8247	4.86359	5.60807	0.063408	0.0389627	0.0517907	0.0195551	0.408866	2.49687	0.614476	0.37758	0.178897	4.74033	4.75392	5.57967	0.101023	0.0363294	0.141351	0.01828	0.478328	1.58419	0.359615	0.129323	0.338477	4.4613	4.49557	5.93623	0.0768722	0.0426381	0.0693502	0.0213356	0.808604	2.46058	0.554662	0.30765	0.209192	5.24787	5.27619	6.22027	0.0747276	0.0408476	0.0682927	0.0204055	0.652325	2.25554	0.546621
22	4	0	0	5.51189	5.74147	8.92217	0.0585687	0.0942553	0.0181759	0.0470734	1.86139	6.76161	1.60931	2.58989	0.152985	6.94439	6.987	8.11494	0.0783311	0.0604205	0.0507051	0.0301683	1.10718	2.74482	0.771347	0.594976	0.225225	6.63532	6.66898	8.22738	0.0823372	0.0551625	0.0613609	0.0275414	1.11215	2.63811	0.669958	0.448843	0.247061	5.90654	5.95814	7.06236	0.0680954	0.0533463	0.0434186	0.026647	1.00221	3.22505	0.783404
22	1	0	0	6.36791	6.38544	7.45462	0.0770992	0.036497	0.0813905	0.0182385	0.403002	2.31701	0.473378	0.224086	0.223957	6.70598	6.75949	8.5355	0.0713698	0.0606501	0.0419194	0.0302726	0.978344	3.92736	0.849801	0.722162	0.23135	6.84971	6.89009	8.0788	0.0456696	0.0340553	0.0305733	0.0170003	1.18102	2.63641	0.745689	0.556053	0.117703	6.74982	6.79349	8.03724	0.050097	0.0385697	0.032513	0.019272	1.50925	2.39571	0.769901
22	2	0	0	4.00769	4.0549	5.34323	0.0768447	0.0474537	0.0622873	0.0237526	0.848661	2.81143	0.617527	0.38134	0.231068	5.3149	5.36885	6.796	0.0980429	0.0745084	0.064488	0.0372441	1.08	3.53957	0.759958	0.577536	0.304143	6.75616	6.79285	8.54584	0.0822589	0.0580527	0.0583386	0.029056	0.871229	2.8643	0.705732	0.498058	0.250304	2.80359	2.8332	3.76169	0.0701442	0.0286856	0.0861757	0.0144122	0.717917	1.83362	0.408952
22	3	0	0	4.74272	4.80709	6.45568	0.0694722	0.0545285	0.0442239	0.0272446	1.13127	2.95789	0.784896	0.616061	0.208325	4.17171	4.20859	5.7517	0.0798689	0.0444453	0.071994	0.0222942	0.708406	2.57321	0.556478	0.309668	0.234804	4.65997	4.72684	6.61116	0.0898062	0.0712211	0.056685	0.0356511	1.28133	3.31323	0.793054	0.628934	0.261583	5.40186	5.45384	6.71407	0.0652845	0.049091	0.0435143	0.0246045	1.27702	2.66996	0.751954
22	4	0	0	5.68477	5.80199	7.28938	0.0490648	0.0569986	0.0212098	0.0286237	0.925724	4.64217	1.1617	1.34955	0.106419	7.47447	7.58488	9.69967	0.0495296	0.0639389	0.0192107	0.0320142	1.86926	5.43403	1.29092	1.66648	0.121516	6.51464	6.63791	9.93608	0.0437947	0.055827	0.0171827	0.0279214	1.54858	5.16928	1.27474	1.62497	0.117236	6.44351	6.51787	8.36177	0.0762205	0.0749107	0.0387847	0.0374632	1.3968	3.66999	0.982816
22	1	0	0	6.00763	6.02311	6.98455	0.0556321	0.0240237	0.064364	0.0120025	0.535961	1.87548	0.431832	0.186479	0.145463	6.43856	6.4594	7.22337	0.0856159	0.0444227	0.0826428	0.0222488	0.798254	2.14364	0.518861	0.269217	0.256124	5.74354	5.78992	7.66159	0.0747132	0.0546983	0.0511349	0.0274076	0.847917	3.38001	0.732111	0.535986	0.229157	6.77739	6.81381	8.02106	0.0542711	0.038221	0.0385304	0.0191104	1.08935	2.67104	0.70426
22	2	0	0	4.13954	4.22822	6.39777	0.0666003	0.0574324	0.0387683	0.0288296	1.19136	3.43064	0.862344	0.743637	0.173563	5.44954	5.5203	7.82871	0.105319	0.0928904	0.0597253	0.0464607	0.974988	4.13614	0.88199	0.777907	0.351387	6.64994	6.70082	8.19746	0.069181	0.0570813	0.0419656	0.0285698	1.51435	3.37213	0.825101	0.680792	0.224838	4.16431	4.44549	8.70541	0.07335	0.114246	0.0235345	0.0570939	1.63367	6.65338	1.55755
22	3	0	0	4.54273	4.57581	6.06887	0.0745957	0.0410229	0.0680133	0.0205693	0.916434	2.31055	0.549937	0.302431	0.213591	4.79457	4.87659	6.16466	0.0734837	0.0655248	0.0412254	0.032779	1.48617	3.09691	0.891693	0.795116	0.198481	4.62724	4.65275	5.25449	0.0898198	0.0437589	0.0923964	0.0219302	0.767377	1.82759	0.487185	0.237349	0.266353	5.71817	5.75352	6.90876	0.062736	0.0399984	0.0492732	0.0200292	1.177	1.9666	0.637567
22	4	0	0	5.88171	6.08788	8.14134	0.043206	0.0679507	0.0137372	0.0339779	2.59686	5.67249	1.57271	2.47343	0.109716	7.52276	7.57673	8.94104	0.081044	0.0732415	0.0448391	0.0366209	1.46594	3.46385	0.903724	0.816718	0.21494	7.27809	7.32122	8.70484	0.0706133	0.056099	0.0446061	0.0281534	1.27286	2.98796	0.794453	0.631156	0.213902	6.29481	6.47035	7.77822	0.037238	0.0558055	0.0124327	0.0279221	1.71854	5.05469	1.49862
22	1	0	0	6.2497	6.27381	7.50951	0.0636422	0.0350094	0.0579376	0.0175323	0.79237	2.39298	0.550097	0.302607	0.201012	6.43118	6.48095	8.37022	0.088329	0.0708843	0.055071	0.0354664	0.964038	3.63023	0.802503	0.644011	0.283172	6.82638	6.88999	8.42041	0.0681929	0.0637699	0.0363998	0.0318311	1.49635	3.68808	0.93514	0.874486	0.203527	6.47831	6.52722	7.65312	0.0574489	0.0458694	0.0360021	0.0229515	1.46931	3.26101	0.798439
22	2	0	0	3.97775	4.0155	5.01379	0.0823564	0.0452791	0.0749314	0.0226498	0.833028	2.21469	0.549794	0.302273	0.272625	5.51627	5.56376	6.77487	0.0903143	0.0655697	0.0622677	0.0328213	0.910382	2.93536	0.726017	0.5271	0.295934	6.41304	6.44559	7.82579	0.0627665	0.0406443	0.0485163	0.0203438	0.670871	3.04803	0.647549	0.419319	0.165769	3.03516	3.09981	4.78143	0.08067	0.0508482	0.064204	0.0255087	0.494546	2.66454	0.630323
22	3	0	0	4.76193	4.81076	6.28818	0.0880651	0.0602796	0.0644516	0.0301972	1.11113	3.37898	0.684489	0.468525	0.271529	4.88464	4.94918	6.69334	0.0716487	0.0571434	0.0449401	0.0285858	1.11405	2.9671	0.79755	0.636086	0.214951	4.69383	4.71882	6.02768	0.0733419	0.0356122	0.0756054	0.0178256	0.656932	2.04777	0.485563	0.235772	0.214891	6.14735	6.16525	7.16865	0.11942	0.0561191	0.127451	0.0281457	0.707493	2.29612	0.469931
22	4	0	0	5.6699	5.83144	8.24331	0.055117	0.0752135	0.0202092	0.037633	0.964392	6.16764	1.36461	1.86217	0.143955	7.48878	7.59331	9.67885	0.0661626	0.083169	0.0263741	0.041675	2.04516	4.38575	1.25704	1.58015	0.180254	7.58252	7.63227	9.16598	0.0753521	0.0656318	0.0433433	0.0328822	1.31353	3.22244	0.871002	0.758644	0.224339	6.52139	6.56108	8.02257	0.0609734	0.0439883	0.0423063	0.022019	0.602709	3.07775	0.721434
22	1	0	0	6.32907	6.34506	7.72746	0.0966484	0.0435479	0.107557	0.0218366	0.813133	2.09425	0.450581	0.203023	0.272648	6.60542	6.65441	8.26495	0.0729039	0.0588255	0.0451839	0.029418	0.901608	3.87721	0.806891	0.651073	0.229046	7.7145	7.77048	9.52891	0.0597914	0.0557272	0.0321429	0.0279216	1.36355	3.51503	0.932026	0.868673	0.162864	7.2606	7.28301	8.65629	0.069489	0.0397163	0.0609169	0.0198996	0.664562	2.44306	0.571548
22	2	0	0	4.15642	4.20743	5.93124	0.0905028	0.0591726	0.0691934	0.029579	0.785871	2.9519	0.653821	0.427482	0.287082	5.14128	5.18207	6.30607	0.0738829	0.0479957	0.0569081	0.0240155	1.03917	2.49846	0.64962	0.422006	0.219893	6.22929	6.28417	8.2756	0.0733222	0.0608284	0.0441862	0.0304109	1.14518	3.18174	0.829604	0.688243	0.226377	2.80823	2.88248	4.59188	0.0703539	0.0457779	0.0541602	0.0229306	1.04732	2.72078	0.65068
22	3	0	0	4.91545	4.9613	6.3821	0.0604799	0.040744	0.0450203	0.0204321	1.07535	2.42458	0.673679	0.453843	0.169761	4.24844	4.297	5.8685	0.0649798	0.0419031	0.0504937	0.0209978	0.918958	2.8373	0.644864	0.41585	0.199304	5.05018	5.10968	6.51629	0.063508	0.0494304	0.0407723	0.0247	1.20925	3.39005	0.778334	0.605803	0.191388	5.54615	5.56241	6.43989	0.0978042	0.0416092	0.115382	0.0208835	0.637239	1.76972	0.425434
22	4	0	0	6.24739	6.40511	9.44503	0.0483239	0.0683452	0.0171125	0.0342299	1.55589	5.83151	1.41432	2.00029	0.118166	7.74237	7.80374	9.15966	0.0630798	0.0616845	0.0323155	0.0309016	1.6597	3.44472	0.97788	0.956249	0.181187	7.24968	7.2921	8.38496	0.0644139	0.0506532	0.0409214	0.025305	1.52312	2.49947	0.786371	0.618379	0.191644	6.25084	6.26732	6.8846	0.0821019	0.0373313	0.0902557	0.0186601	0.458935	1.92332	0.454694
23	1	0	0	6.2016	6.21856	6.85554	0.064476	0.0296261	0.0700837	0.0147969	0.797456	1.39684	0.459491	0.211132	0.163603	5.75487	5.81662	6.97111	0.067536	0.0571587	0.0398958	0.0285773	1.26256	3.03414	0.846344	0.716299	0.18867	7.09412	7.21076	10.1307	0.0675623	0.0873763	0.0261293	0.0437026	2.01578	5.37366	1.29327	1.67255	0.167318	6.9285	6.94226	7.73491	0.0918936	0.0401997	0.104956	0.0200854	0.693778	1.71607	0.437459
23	2	0	0	5.27643	5.28503	5.76133	0.0702994	0.0211976	0.116505	0.0105928	0.41181	1.28335	0.301533	0.090922	0.192164	5.2021	5.25415	6.27875	0.0605338	0.0446963	0.0410009	0.0223532	1.18929	2.74707	0.738369	0.545189	0.164141	7.45683	7.52143	8.91389	0.0514924	0.0506965	0.0261833	0.0253802	1.16282	3.83571	0.984543	0.969326	0.148078	5.18883	5.24331	6.87777	0.0607165	0.0458137	0.0402252	0.0229021	0.861531	3.61922	0.754551
23	3	0	0	4.75201	4.82871	6.35496	0.0599523	0.0514437	0.0349021	0.0256983	1.33782	3.05311	0.858077	0.736296	0.158278	4.30688	4.34195	5.72259	0.0711523	0.0392286	0.0645241	0.0196133	0.91485	2.36903	0.551334	0.303969	0.183536	4.41981	4.45824	5.58495	0.0478955	0.0280049	0.0410891	0.0140477	0.861422	2.15421	0.584709	0.341885	0.122175	5.67564	5.69848	6.72689	0.0803554	0.0410007	0.078727	0.0204963	0.944456	1.95691	0.510242
23	4	0	0	5.91104	5.99589	7.55707	0.05466	0.0550104	0.027188	0.0275376	1.30108	3.62783	1.00641	1.01286	0.133803	6.76316	6.88806	9.13796	0.0549694	0.0718668	0.0210547	0.0359885	2.04984	5.00652	1.3074	1.70928	0.140265	7.44466	7.52732	9.3794	0.0379764	0.0423001	0.0170742	0.0211834	1.26065	4.2087	1.11385	1.24066	0.0741282	6.56711	6.62143	8.10168	0.0598043	0.0506811	0.0352661	0.0253271	0.984428	3.62519	0.84745
23	1	0	0	6.2165	6.23251	7.21404	0.0668621	0.0298803	0.075125	0.0150036	0.54588	1.8929	0.446894	0.199715	0.209854	6.29485	6.33381	7.79724	0.0775192	0.0544429	0.0551737	0.0272142	0.770608	2.98889	0.702315	0.493246	0.246954	6.95736	7.01436	8.67875	0.0823661	0.0735954	0.0460754	0.0367852	1.30974	3.48969	0.893515	0.79837	0.248247	7.01293	7.05191	8.20858	0.0809036	0.0599824	0.0546106	0.0300185	1.43799	2.40444	0.741406
23	2	0	0	6.40841	6.44943	7.9022	0.0729556	0.0530433	0.0501612	0.0265163	1.0726	2.83984	0.727063	0.52862	0.220165	5.30754	5.36112	6.82563	0.0769609	0.0582546	0.0507567	0.0290813	1.20653	2.68029	0.756938	0.572955	0.220467	7.66678	7.69216	8.74432	0.0659172	0.0411951	0.0527153	0.0205888	0.922497	2.38222	0.624952	0.390565	0.19546	5.85911	5.88027	6.97699	0.0554622	0.0276723	0.0556356	0.01385	0.607409	1.89756	0.49894
23	3	0	0	5.94147	5.96537	7.46445	0.0670827	0.0358123	0.0628793	0.0179205	0.656502	2.45711	0.533853	0.284999	0.20342	5.21151	5.27394	7.23205	0.0728991	0.0590327	0.0449953	0.0295058	1.21366	3.40892	0.809786	0.655754	0.230265	5.2024	5.2657	7.54045	0.054799	0.0446474	0.0336178	0.022316	0.902919	3.7029	0.814747	0.663813	0.120729	5.63803	5.70344	7.80361	0.0679911	0.0586105	0.0394192	0.0292924	1.238	3.89904	0.862032
23	4	0	0	6.09036	6.17523	7.96072	0.034995	0.0357392	0.0171157	0.0178514	1.47372	4.0738	1.02127	1.04299	0.0773186	6.77938	6.90052	9.09853	0.0532649	0.0686361	0.0206704	0.0343219	1.93624	5.84573	1.28858	1.66044	0.123015	7.41466	7.48092	9.08419	0.0610626	0.0607205	0.0307293	0.0303859	1.48173	3.80327	0.994397	0.988826	0.164547	6.94465	7.05117	9.34832	0.0491176	0.0600291	0.0200719	0.0299804	1.77524	5.04667	1.22215
23	1	0	0	6.31712	6.35857	7.78489	0.0392933	0.0285002	0.0271143	0.0142645	0.96518	3.14204	0.72532	0.526089	0.102777	6.6255	6.647	7.5113	0.0608728	0.0325421	0.0569659	0.0162802	0.553082	2.45218	0.534591	0.285788	0.159833	6.28852	6.31634	7.41484	0.066352	0.0393172	0.0559926	0.0196602	0.717972	2.4948	0.592555	0.351121	0.19566	7.1549	7.19657	8.93678	0.055488	0.0429358	0.035835	0.0214559	1.14608	3.15721	0.773784
23	2	0	0	6.25976	6.28569	7.33904	0.0784921	0.0448093	0.0687335	0.0224002	0.701782	2.74495	0.570876	0.3259	0.245562	6.09795	6.142	7.37353	0.0704822	0.0518041	0.0480091	0.0259354	1.24252	2.6529	0.734996	0.540219	0.198907	7.21194	7.24656	8.77109	0.0641417	0.0454226	0.0453482	0.0227417	0.932068	3.0225	0.708161	0.501491	0.17904	6.08755	6.14759	7.66812	0.0722812	0.0620116	0.0421258	0.0310058	1.50829	2.92995	0.857921
23	3	0	0	5.62823	5.65006	6.7068	0.0756411	0.0375802	0.076097	0.0187832	0.694557	2.00055	0.496823	0.246833	0.205814	4.88656	4.92474	6.19206	0.0636313	0.0389922	0.051949	0.019507	0.684598	2.64112	0.612783	0.375503	0.183271	5.72905	5.76446	7.36843	0.0823341	0.0525835	0.0645478	0.0263282	0.8528	2.60182	0.63866	0.407887	0.243266	5.97383	5.99556	6.77732	0.0719684	0.0367487	0.0703456	0.0183416	0.826815	1.8603	0.510622
23	4	0	0	6.52907	6.59712	7.93676	0.0531529	0.0502961	0.0281293	0.0251867	1.54847	3.28478	0.946252	0.895393	0.145096	7.00367	7.04443	8.27032	0.0596515	0.0451915	0.0394899	0.0226651	1.32842	3.63986	0.757592	0.573946	0.157479	7.26468	7.32438	8.92539	0.0493067	0.0460673	0.0263455	0.0229974	1.74986	3.13517	0.9343	0.872917	0.121392	6.81187	6.87155	7.79283	0.0432527	0.0391305	0.024011	0.0196523	1.524	3.62175	0.904695
23	1	0	0	6.94188	6.96178	8.22626	0.0745572	0.0392537	0.0708601	0.0196419	0.746857	2.40737	0.526491	0.277193	0.215902	6.12503	6.18378	7.45336	0.063259	0.0538499	0.0372235	0.0269738	0.851795	3.36753	0.851261	0.724645	0.182149	6.47277	6.49594	7.50708	0.0610421	0.0334967	0.0558628	0.0168216	0.591153	2.60104	0.548747	0.301124	0.17553	7.27312	7.28731	7.95103	0.0667114	0.0303507	0.0733817	0.0151889	0.800846	1.89752	0.454955
23	2	0	0	5.50574	5.53609	7.056	0.060079	0.0348114	0.0518969	0.0174236	0.886318	2.44682	0.579427	0.335735	0.175852	5.34045	5.38748	6.89574	0.0574453	0.0408417	0.0403419	0.0203919	1.10974	2.73864	0.710968	0.505476	0.160284	7.50938	7.54677	9.19549	0.0571576	0.0429282	0.0380791	0.0214794	0.980444	2.8388	0.751049	0.564075	0.151974	5.32941	5.37792	6.79434	0.0385012	0.0277753	0.0267634	0.0139287	1.14302	2.50305	0.721415
23	3	0	0	5.06893	5.11594	6.1171	0.0606408	0.0419939	0.0437599	0.0209854	0.924822	2.78919	0.692502	0.479559	0.162638	4.40356	4.45927	6.03837	0.0425784	0.0299437	0.0302501	0.014961	0.990837	2.90455	0.70326	0.494575	0.106883	4.79574	4.86238	6.57043	0.0562116	0.0451346	0.0350148	0.0225745	1.21977	3.05347	0.80294	0.644713	0.150353	5.57895	5.62308	7.14444	0.0598971	0.0421504	0.0426565	0.021124	0.956016	2.99523	0.703713
23	4	0	0	6.06488	6.11484	7.32791	0.0457537	0.0357226	0.0292951	0.0178579	1.10085	3.67856	0.780759	0.609585	0.10392	6.80669	6.87173	8.21544	0.0362052	0.0341809	0.0191867	0.0171012	1.03787	4.07738	0.944091	0.891307	0.0824619	6.57786	6.6578	9.01063	0.0628043	0.0646616	0.0305024	0.0323331	1.25961	3.91541	1.02957	1.06002	0.182693	6.47429	6.50596	7.70683	0.0870547	0.0558677	0.0678517	0.0279446	1.01423	2.43668	0.641754
23	1	0	0	6.78548	6.80665	7.94108	0.0656624	0.0352566	0.0611496	0.0176296	0.915654	2.02272	0.536938	0.288303	0.211021	5.89857	5.94279	7.20529	0.0549429	0.0397955	0.0379096	0.0198881	0.879564	3.02283	0.724307	0.52462	0.149671	6.17504	6.22891	7.33891	0.0724395	0.0592739	0.0443191	0.0296734	1.53458	2.76239	0.818254	0.669539	0.221772	7.5907	7.60155	8.3897	0.0738113	0.0299862	0.0908453	0.0149934	0.505782	1.7954	0.406255
23	2	0	0	5.48951	5.50632	6.14257	0.0603705	0.0259815	0.0702706	0.0130152	0.439689	1.89901	0.430367	0.185216	0.153588	5.72601	5.91016	8.44648	0.0474811	0.0695821	0.0162158	0.0348251	2.54978	5.0786	1.46547	2.1476	0.131807	7.66068	7.66881	8.32625	0.0930657	0.0328819	0.131668	0.0164368	0.444269	1.55941	0.35332	0.124835	0.270497	4.93741	4.97727	5.93914	0.0596667	0.037554	0.0474906	0.0188129	0.788448	2.46903	0.629397
23	3	0	0	4.6562	4.6827	6.00128	0.10833	0.0540963	0.109012	0.0271839	0.81392	2.11204	0.499365	0.249365	0.226995	4.32469	4.34359	5.01081	0.0897002	0.0364406	0.110836	0.0182921	0.762783	1.18896	0.406249	0.165038	0.221589	4.10405	4.12532	5.09172	0.133118	0.0559041	0.159689	0.0281635	0.659311	1.68892	0.419958	0.176365	0.300859	6.0308	6.03945	6.45566	0.0881808	0.0285995	0.136365	0.014344	0.624994	0.938814	0.324328
23	4	0	0	5.81654	5.91467	7.74558	0.0485268	0.0521155	0.0225918	0.0260568	1.30794	4.43005	1.07395	1.15338	0.116035	6.88536	6.94862	8.64892	0.0421207	0.0394403	0.0225522	0.0197733	1.59434	3.68375	0.936365	0.87678	0.101449	6.93882	6.99294	8.8723	0.0561252	0.0487839	0.0322787	0.0243867	1.15224	3.15726	0.869197	0.755504	0.15463	6.75665	6.86414	9.25792	0.0586334	0.0710105	0.0242121	0.0355129	1.78718	4.60368	1.21109
24	1	0	0	6.37329	6.42294	7.76179	0.0686723	0.0547867	0.0430115	0.0273761	1.20151	3.07247	0.797799	0.636483	0.186013	5.91304	5.92764	6.76757	0.0780532	0.0324886	0.0936995	0.0162337	0.65309	1.74904	0.416236	0.173253	0.256966	6.2904	6.3316	8.46459	0.0510389	0.0368408	0.0353796	0.0184335	0.65382	3.28388	0.721818	0.521022	0.126572	7.03874	7.09625	8.49775	0.0531433	0.0479619	0.0294614	0.0239966	1.51493	3.61887	0.902502
24	2	0	0	3.16957	3.2272	4.38283	0.0496816	0.0302016	0.0408689	0.0151029	0.982706	2.16565	0.607903	0.369546	0.117091	4.91879	4.96643	5.93002	0.0670858	0.046092	0.0488579	0.0230634	0.965211	2.51904	0.68706	0.472051	0.170358	5.26567	5.29007	6.4789	0.0623158	0.0316595	0.0613961	0.0158472	0.656871	2.04347	0.50805	0.258115	0.176888	2.78353	2.8997	3.89351	0.0690755	0.0561965	0.0424186	0.0280755	1.13293	2.89932	0.813552
24	3	0	0	5.25043	5.33701	7.32876	0.0766295	0.0734357	0.0400728	0.0368021	1.18593	4.21155	0.958322	0.91838	0.24001	4.65689	4.75945	6.22352	0.0701688	0.0690212	0.0356671	0.0345101	1.50758	3.74884	0.983646	0.967559	0.197819	5.60326	5.64446	7.36525	0.0995058	0.0678025	0.0731046	0.0339422	1.1471	2.73734	0.681393	0.464296	0.304421	4.98561	5.03279	6.51483	0.0721421	0.0496458	0.0524872	0.0248565	0.921228	2.72489	0.688166
24	4	0	0	6.02415	6.11471	7.80758	0.0448223	0.0470508	0.0213957	0.0235762	1.21072	4.78314	1.04972	1.10191	0.0923309	7.35996	7.50704	10.4218	0.0495339	0.0733339	0.0167088	0.0366227	2.31068	5.46151	1.48048	2.19182	0.123802	7.9947	8.04058	9.16327	0.0619297	0.0531831	0.036096	0.0266201	1.15844	2.94738	0.858767	0.73748	0.167536	6.78792	6.84805	8.40489	0.0593929	0.0538392	0.0327448	0.0269073	1.64851	3.20162	0.906493
24	1	0	0	5.84634	5.86685	6.60645	0.0637643	0.0312883	0.0649391	0.0156356	0.535916	2.19407	0.490686	0.240773	0.182563	6.24724	6.3019	8.26839	0.0897131	0.0743743	0.0540607	0.0371548	1.24343	3.23224	0.829024	0.68728	0.281045	6.51906	6.54358	7.70138	0.0663346	0.0375787	0.0587229	0.0188457	0.692892	2.28909	0.566503	0.320926	0.196466	6.99103	7.04429	8.60368	0.0890056	0.0770303	0.0514998	0.038574	1.20314	3.36791	0.865455
24	2	0	0	3.85557	3.91001	5.11779	0.0836461	0.0544423	0.0643109	0.0272438	0.965006	2.60821	0.650866	0.423626	0.279512	5.39025	5.49284	8.37224	0.0790584	0.0836198	0.0373736	0.0418107	1.15667	4.93882	1.0577	1.11872	0.220474	5.09158	5.13888	6.27611	0.077558	0.0540037	0.0557134	0.0270118	1.13594	2.57126	0.696301	0.484835	0.248169	3.09113	3.20528	4.51529	0.0545437	0.0462873	0.0321867	0.0231799	1.30709	3.06075	0.848628
24	3	0	0	4.91644	4.95053	6.1798	0.0743591	0.0431652	0.0641656	0.0216223	0.788966	2.44662	0.580496	0.336976	0.230427	5.19589	5.26504	6.83112	0.0743033	0.0632594	0.0436762	0.0316578	0.915624	3.47813	0.851368	0.724828	0.222271	6.23515	6.31086	8.28596	0.0717202	0.0699691	0.036803	0.0350278	1.58187	3.6855	0.975583	0.951763	0.210431	5.42532	5.48374	6.73434	0.0408501	0.0326428	0.0255388	0.0163076	1.42418	2.94497	0.799089
24	4	0	0	6.01706	6.07632	7.46576	0.0746895	0.0633008	0.0440181	0.0316178	1.02349	3.48618	0.84752	0.718289	0.211443	6.75612	6.86867	8.773	0.0738661	0.0915773	0.0297513	0.045729	2.57503	3.90956	1.23978	1.53704	0.220063	8.10747	8.14538	9.31806	0.0838712	0.0659164	0.0534962	0.0330434	1.28609	3.73164	0.785924	0.617676	0.236931	6.16145	6.27413	8.28083	0.0494268	0.0585789	0.0208344	0.0292643	1.86358	4.28575	1.18516
24	1	0	0	5.87761	5.92691	7.39637	0.0575987	0.0439937	0.0377204	0.0220056	1.26914	2.57683	0.763798	0.583387	0.167831	6.15366	6.16958	7.24908	0.0637947	0.0282939	0.0720562	0.0141739	0.582094	1.87179	0.443515	0.196706	0.176711	6.27812	6.30279	7.45255	0.0855688	0.0477301	0.0768308	0.023905	0.682811	3.04197	0.557798	0.311138	0.230013	6.25771	6.30184	7.17082	0.0518271	0.0386286	0.0347744	0.019318	0.970296	2.58181	0.745335
24	2	0	0	4.09742	4.15934	5.80968	0.0749963	0.0536796	0.0524416	0.0268668	1.01922	2.93485	0.715763	0.512317	0.212197	5.03028	5.05162	6.48838	0.0938474	0.0435765	0.101056	0.0217884	0.617725	2.40568	0.464334	0.215606	0.300209	5.70944	5.77678	7.69405	0.0772792	0.0680358	0.0438858	0.0340152	1.31447	3.76615	0.880389	0.775084	0.213845	3.48196	3.57795	4.90831	0.0936537	0.0771755	0.0567801	0.0385572	1.18359	3.20569	0.824052
24	3	0	0	5.33822	5.39396	6.71368	0.0605989	0.0469094	0.0391566	0.0234636	1.34904	2.79626	0.774096	0.599225	0.162549	5.39452	5.4659	7.1216	0.0858368	0.0756398	0.0487461	0.0378524	1.30003	3.93546	0.881205	0.776522	0.276063	6.58632	6.64027	8.53232	0.0605789	0.0512157	0.0358384	0.0256161	1.21367	4.03602	0.845438	0.714766	0.165367	6.00553	6.11422	8.13675	0.0791566	0.0909298	0.0344701	0.0454864	1.69736	4.60291	1.14873
24	4	0	0	6.18573	6.23503	8.42721	0.0776595	0.0608475	0.0496243	0.0304643	0.711566	4.06895	0.783516	0.613898	0.195411	6.52816	6.60231	8.64096	0.0870118	0.0859586	0.0440883	0.0430275	1.51523	3.79289	0.987896	0.975938	0.264999	8.00834	8.08575	9.61365	0.0598011	0.0668289	0.0268333	0.0335107	1.78756	3.98777	1.11752	1.24885	0.166291	6.21827	6.33097	8.59377	0.0695892	0.0828583	0.0292201	0.0414258	2.07658	4.08615	1.19068
24	1	0	0	5.72712	5.73358	6.2201	0.104351	0.0284269	0.191837	0.0142364	0.422058	1.11443	0.272417	0.0742111	0.335258	6.93449	6.95679	7.98443	0.0620225	0.0345589	0.0558121	0.0173281	1.02729	1.84314	0.5572	0.310472	0.172033	6.36694	6.40259	7.41909	0.0663493	0.0448133	0.0491698	0.0224305	1.11395	2.46541	0.675415	0.456186	0.21992	6.08241	6.10938	7.50448	0.0787869	0.0452295	0.0686772	0.0226333	0.475055	2.72049	0.574074
24	2	0	0	3.27719	3.30309	3.87225	0.0576542	0.0238227	0.0697579	0.0119101	0.344094	1.73425	0.4132	0.170734	0.165794	5.40581	5.46574	6.70439	0.0820854	0.0663241	0.0508113	0.033172	1.25509	3.14577	0.807989	0.652846	0.222164	5.7972	5.92089	8.44548	0.0877248	0.105719	0.0364142	0.0528854	1.74456	4.68436	1.20513	1.45233	0.296474	3.49977	3.72698	5.387	0.0750945	0.0963244	0.0292874	0.0481878	2.12806	4.29036	1.28271
24	3	0	0	4.65871	4.71788	6.23247	0.0843163	0.0628611	0.0566027	0.0314614	1.16258	2.98596	0.745539	0.555829	0.260883	4.45475	4.53713	6.79394	0.0643605	0.0554476	0.037358	0.0277275	0.876029	3.75945	0.861517	0.742211	0.18665	6.50344	6.55736	8.32688	0.0831246	0.0698253	0.0495194	0.0349415	1.20108	3.34343	0.840007	0.705612	0.262303	4.58112	4.73506	7.99455	0.057629	0.0690788	0.0240314	0.0345293	1.29354	5.11004	1.19868
24	4	0	0	6.44829	6.51743	8.07371	0.0567224	0.0537566	0.0299216	0.0268745	1.64345	4.04873	0.947715	0.898164	0.149199	7.58967	7.70088	9.7809	0.049328	0.0643811	0.018886	0.0321713	2.10501	4.95369	1.30516	1.70345	0.126003	7.81124	7.86024	9.12877	0.0652245	0.0572031	0.0371716	0.028591	0.868159	4.44713	0.877019	0.769162	0.155657	6.80681	6.93931	8.71593	0.0551076	0.0744381	0.0203809	0.037187	2.13389	5.17339	1.35078
24	1	0	0	6.19685	6.21634	7.19927	0.0798367	0.0393078	0.0811393	0.019669	0.82627	1.8172	0.492352	0.242411	0.239822	6.38208	6.39576	7.49995	0.082396	0.0344823	0.0986278	0.0172735	0.486099	1.89015	0.418495	0.175138	0.234403	6.73421	6.7869	8.22095	0.0735353	0.0621414	0.0435371	0.0310906	1.12811	3.04161	0.845055	0.714119	0.216937	6.03973	6.07302	7.43044	0.0934527	0.0594119	0.0735974	0.0297458	0.854121	2.66624	0.635743
24	2	0	0	3.65065	3.71299	5.33975	0.082626	0.05602	0.0609351	0.0280105	0.849508	3.27288	0.677995	0.459678	0.273265	5.50677	5.579	7.4866	0.0575057	0.0514905	0.0321098	0.0257436	1.54131	3.66421	0.895398	0.801738	0.187113	5.1957	5.26255	7.06953	0.0557843	0.0466751	0.0333423	0.0233422	1.0794	3.51729	0.836706	0.700077	0.156205	3.27717	3.36216	4.84328	0.0834671	0.0627419	0.0555405	0.031383	1.18488	2.78098	0.751696
24	3	0	0	5.01249	5.08792	6.73235	0.0745376	0.0651257	0.0426418	0.0325529	1.36443	2.95494	0.873729	0.763403	0.207627	5.10001	5.15496	6.19978	0.0805024	0.060489	0.0535836	0.030253	1.0205	3.05788	0.751394	0.564593	0.234997	6.93517	6.98826	8.87706	0.0718053	0.0617967	0.0417341	0.0309107	0.875677	3.89389	0.860615	0.740659	0.204792	4.63882	4.68386	5.85459	0.0791424	0.0513321	0.0609975	0.0256608	0.815033	2.9369	0.648604
24	4	0	0	6.53191	6.61437	8.89492	0.0525844	0.0548023	0.0252399	0.0274139	1.35716	4.39338	1.04218	1.08614	0.127996	7.54767	7.68617	10.7014	0.057971	0.0842911	0.0199345	0.0421451	1.84356	5.85187	1.45402	2.11418	0.157584	7.97192	8.00965	9.27335	0.0681661	0.0529853	0.0439158	0.0265335	0.992192	3.25715	0.777297	0.604191	0.188227	6.51904	6.56734	7.97838	0.0533388	0.0424451	0.0335765	0.0212619	1.48596	3.03748	0.795763
25	1	1	0	7.45032	7.46922	8.55294	0.0489824	0.02603	0.0462151	0.0130512	0.919976	2.00254	0.531415	0.282402	0.135239	7.70723	7.71935	8.38483	0.049494	0.0214194	0.0574353	0.0107569	0.686304	1.65447	0.432767	0.187287	0.149907	7.61937	7.64302	8.68432	0.0454823	0.0273444	0.037917	0.0137052	1.06919	2.22692	0.60121	0.361454	0.131875	7.71294	7.73471	8.71785	0.0427632	0.0248162	0.0369426	0.0124411	1.09853	2.01725	0.580318
25	2	1	0	5.82825	5.8836	9.59719	0.0513644	0.0413842	0.0319639	0.0207493	0.764544	5.28364	0.805697	0.649148	0.125897	6.67571	6.69685	7.94423	0.0560113	0.0298008	0.0527153	0.0149225	0.643789	2.65372	0.53205	0.283077	0.139926	5.68805	5.71274	6.55072	0.0624484	0.0331565	0.0589411	0.0166155	0.786002	2.01161	0.530943	0.2819	0.16896	5.93043	5.96131	6.92866	0.0366747	0.0222409	0.0302927	0.0111406	1.21325	1.89005	0.606436
25	3	1	0	7.54593	7.5852	9.19136	0.0513308	0.0395974	0.0332448	0.0197834	0.918754	3.14211	0.771416	0.595083	0.132102	6.33407	6.35241	7.36718	0.0466	0.0224906	0.0482581	0.0112409	0.818612	1.6429	0.48263	0.232932	0.105719	5.56058	5.57793	6.47753	0.0555329	0.0244302	0.0632009	0.0122315	0.679426	1.78011	0.439924	0.193533	0.154038	5.88014	5.89461	6.84142	0.0381876	0.0157745	0.046281	0.0078971	0.569615	1.76019	0.413078
25	4	1	0	7.77544	7.79022	8.99156	0.050635	0.0243028	0.0528163	0.0121669	0.522306	2.50972	0.479961	0.230362	0.135377	7.61239	7.61911	8.63581	0.0326906	0.0104637	0.0510563	0.00523087	0.469838	1.50429	0.320083	0.102453	0.0658107	7.66576	7.67594	8.42623	0.0460714	0.0182183	0.0583814	0.00912908	0.559205	2.08802	0.395436	0.15637	0.109162	8.0541	8.0615	8.6352	0.0543655	0.0187892	0.0786325	0.00939234	0.434329	1.51768	0.345609
25	1	1	0	7.45454	7.46348	8.02771	0.0428916	0.0156712	0.0587788	0.00784661	0.604969	1.26073	0.365368	0.133494	0.114775	7.74283	7.75823	8.74093	0.0443357	0.021672	0.0454316	0.0108555	0.658155	1.99847	0.488816	0.238941	0.114673	7.72226	7.75487	9.64076	0.0506044	0.0359789	0.0356172	0.0180044	0.804746	3.35428	0.710984	0.505498	0.140115	7.73342	7.75186	8.4169	0.0360457	0.019275	0.0337241	0.00964325	0.838777	2.18908	0.534739
25	2	1	0	5.94904	5.98343	7.13405	0.0414772	0.0265863	0.0323859	0.0133061	1.00932	2.33828	0.640985	0.410862	0.104556	6.54376	6.56945	7.60106	0.0571614	0.0332004	0.0491954	0.0165961	1.0032	2.20667	0.580819	0.33735	0.155732	5.70675	5.72625	6.92542	0.0457617	0.0216192	0.0484759	0.0108193	0.578542	2.16392	0.47243	0.22319	0.116776	5.77788	5.78743	6.86725	0.0480661	0.0159909	0.0723166	0.00800397	0.426651	1.69331	0.332685
25	3	1	0	7.33637	7.35929	8.41962	0.0406684	0.0236146	0.0349944	0.011799	0.916809	2.11941	0.580663	0.337169	0.0993484	6.87341	6.88568	7.96622	0.0403794	0.0166028	0.049104	0.00830159	0.540799	1.80388	0.411171	0.169061	0.109475	5.91367	5.92489	6.68406	0.0463458	0.016899	0.0636588	0.00846368	0.412548	1.65913	0.364628	0.132954	0.124082	5.93275	5.9512	7.37237	0.0411978	0.0193057	0.0440021	0.00966262	0.718656	2.15453	0.468609
25	4	1	0	7.3429	7.34929	8.03158	0.0466515	0.0142959	0.0764866	0.00718255	0.311897	1.76796	0.306441	0.0939059	0.115507	7.81919	7.83015	8.75502	0.0506455	0.0209854	0.061117	0.0104934	0.62843	1.77255	0.414359	0.171693	0.130244	7.30729	7.3228	8.5315	0.0444813	0.0212033	0.0466466	0.0105992	0.717499	2.08486	0.476679	0.227223	0.093704	7.71453	7.72264	8.41449	0.0416319	0.014736	0.0587852	0.00736502	0.475303	1.38656	0.353959
25	1	1	0	7.94932	7.97861	8.87128	0.053111	0.0363247	0.0388431	0.0181697	0.884802	2.38947	0.683939	0.467773	0.131634	7.91224	7.91988	8.51714	0.053305	0.0185638	0.0765218	0.00928077	0.487009	1.5374	0.348257	0.121283	0.122897	7.24429	7.25707	7.8124	0.073017	0.0314653	0.0847963	0.0157468	0.732175	1.41979	0.430931	0.185702	0.201058	7.67636	7.69955	8.65966	0.0324896	0.019423	0.027129	0.00969566	1.16829	1.7151	0.597821
25	2	1	0	6.22593	6.2572	7.63837	0.0456564	0.0285407	0.0365423	0.0142798	0.921689	2.46026	0.62512	0.390775	0.11609	6.68979	6.71627	7.81733	0.0665633	0.039678	0.0558481	0.0198444	1.05744	2.26554	0.596095	0.355329	0.180699	6.2294	6.25467	7.34958	0.047714	0.0268139	0.0424268	0.0133989	0.830724	2.02601	0.561971	0.315811	0.136818	5.94329	5.95851	6.87565	0.0591296	0.0251777	0.0695455	0.0126093	0.560504	1.76807	0.425805
25	3	1	0	8.23847	8.26057	9.14277	0.0427911	0.0258544	0.0354369	0.0129365	1.1445	2.05333	0.6042	0.365058	0.117011	7.2149	7.23482	8.62496	0.0367873	0.0197465	0.0342691	0.00987388	0.912948	2.14231	0.536775	0.288128	0.0869092	5.87984	5.89343	7.14064	0.0404568	0.0161885	0.0506484	0.0081095	0.535633	2.11519	0.400142	0.160114	0.11033	6.85312	6.86662	8.01789	0.0522115	0.0224851	0.0606996	0.0112575	0.611786	1.98363	0.430654
25	4	1	0	7.46126	7.47216	8.11569	0.0673229	0.0271776	0.0835283	0.0136123	0.521138	2.35719	0.40369	0.162966	0.169644	7.69426	7.71577	8.87701	0.0356027	0.0205137	0.0308967	0.0102573	0.849758	2.94786	0.576183	0.331987	0.0740278	7.48264	7.48647	7.83714	0.0396854	0.00950741	0.0829125	0.00475864	0.349279	1.00817	0.239569	0.0573935	0.100674	7.66354	7.67126	8.31736	0.0442767	0.0152415	0.0643631	0.00762676	0.416401	1.58952	0.344232
25	1	1	0	7.51763	7.52942	8.34666	0.0456006	0.0192169	0.0541531	0.00961723	0.535891	1.68053	0.421418	0.177593	0.119528	7.83093	7.83475	8.31784	0.0379798	0.0092999	0.0777872	0.00466402	0.271794	1.12877	0.244865	0.0599587	0.0929032	7.34283	7.37019	8.42614	0.0346941	0.0220269	0.0273269	0.011015	0.710846	2.5908	0.634889	0.403084	0.080046	7.52972	7.55222	8.49359	0.0467779	0.0272694	0.0401153	0.0136326	0.957919	2.49016	0.582955
25	2	1	0	6.54211	6.57139	7.73663	0.0601837	0.0373202	0.0485103	0.0186537	0.897102	2.69626	0.620105	0.38453	0.17508	6.28674	6.31331	7.69707	0.0410129	0.023744	0.0354431	0.0118795	0.765022	2.49431	0.578939	0.33517	0.100565	6.06507	6.09331	7.17452	0.0520535	0.0305198	0.0444407	0.0152773	0.983891	2.31813	0.586317	0.343767	0.137416	6.02194	6.04697	7.62422	0.0496405	0.0272967	0.0451315	0.0136467	0.403656	2.4966	0.549887
25	3	1	0	7.93237	7.94345	8.69705	0.0506854	0.0212739	0.0604022	0.010641	0.724602	1.42306	0.419725	0.176169	0.130168	6.89142	6.90926	7.96681	0.0517459	0.0256956	0.0521091	0.0128493	0.77923	1.97997	0.496572	0.246584	0.152342	5.95015	5.9642	7.02177	0.0530006	0.0216978	0.0648442	0.0108677	0.511569	1.68992	0.409387	0.167598	0.152678	6.90719	6.93687	7.76806	0.0374581	0.0240264	0.0292131	0.0120189	1.03306	2.26061	0.64142
25	4	1	0	7.49309	7.50936	8.3706	0.0537278	0.0265618	0.0543635	0.013287	0.63433	2.68225	0.494378	0.24441	0.122929	7.83534	7.85953	9.13699	0.0289011	0.0178185	0.0234157	0.00890061	0.728091	2.57119	0.616533	0.380113	0.0645392	7.69476	7.70652	8.52011	0.0413864	0.0176233	0.0486778	0.00882658	0.624202	2.35244	0.425825	0.181327	0.0924098	8.00302	8.01717	8.95436	0.0498084	0.0237312	0.0522589	0.011863	0.539351	2.4981	0.476449
25	1	1	0	7.89722	7.91083	8.80877	0.0436239	0.0202496	0.0470194	0.0101312	0.463487	1.85668	0.464186	0.215469	0.114059	7.85793	7.86982	8.7681	0.0497481	0.0215231	0.0576081	0.0107831	0.742831	1.99238	0.432642	0.187179	0.123501	7.51739	7.52907	8.46212	0.043285	0.0181556	0.0516613	0.00908891	0.679216	1.55801	0.419443	0.175933	0.114004	7.20921	7.21772	7.85212	0.0664022	0.0232711	0.0948101	0.0116446	0.445089	1.38261	0.350457
25	2	1	0	6.32204	6.34486	7.28752	0.0575111	0.0309421	0.0534352	0.0154676	0.797659	2.00318	0.538019	0.289464	0.155199	6.02809	6.04436	6.85272	0.0464425	0.0205926	0.0523488	0.010292	0.615159	1.72619	0.4434	0.196604	0.124676	6.43971	6.45698	7.39416	0.0548363	0.0258949	0.0580774	0.0129509	0.474813	2.32675	0.472222	0.222994	0.162307	6.17043	6.18671	7.57747	0.0478866	0.0214951	0.0533841	0.0107564	0.400744	2.1596	0.448876
25	3	1	0	8.1797	8.19042	8.99524	0.0446591	0.0187104	0.0533243	0.00935988	0.583224	1.77409	0.41896	0.175528	0.11482	7.02378	7.0544	8.46073	0.0291361	0.0191363	0.0221719	0.00956434	0.916767	2.58765	0.65679	0.431373	0.0733428	5.94807	5.96639	7.24217	0.0444516	0.0207775	0.0475714	0.0103934	0.652626	2.19918	0.467419	0.21848	0.121517	6.60028	6.61103	7.36765	0.051085	0.0192626	0.06779	0.00963845	0.586064	1.51905	0.377069
25	4	1	0	7.30874	7.32219	8.12519	0.046495	0.0206391	0.0523551	0.0103164	0.668041	2.09915	0.443899	0.197046	0.119538	7.55571	7.57429	8.56953	0.045702	0.0242489	0.0431135	0.0121375	0.858732	2.33285	0.530588	0.281524	0.107339	7.35817	7.37168	8.05356	0.0571665	0.0255203	0.0640195	0.0127585	0.584932	2.10952	0.44642	0.199291	0.165901	7.63438	7.64493	8.33732	0.0501314	0.0201401	0.0624805	0.0100843	0.644686	1.45657	0.401746
26	1	1	0	7.54663	7.58356	8.61636	0.0471272	0.0352589	0.0314781	0.0176199	0.996272	2.98643	0.748165	0.559751	0.118119	7.39219	7.4017	7.92425	0.0282304	0.0105988	0.0376082	0.00530099	0.487431	1.48494	0.375438	0.140953	0.0560694	7.80591	7.81516	8.52387	0.0575503	0.0218904	0.0755911	0.0109366	0.618332	1.51075	0.38037	0.144681	0.173735	7.55381	7.56587	8.47885	0.0561185	0.0239865	0.0656232	0.0119889	0.628217	1.82948	0.427426
26	2	1	0	6.46662	6.49573	7.97145	0.0544075	0.0334422	0.0443598	0.0167595	0.916866	2.27287	0.614662	0.377809	0.150409	6.73636	6.762	8.19895	0.0514296	0.030276	0.0437349	0.0151564	0.855939	2.33051	0.588687	0.346553	0.141548	8.1153	8.13811	8.97804	0.0496621	0.0302607	0.040773	0.0151385	0.722651	2.67056	0.609333	0.371287	0.145963	5.68503	5.69744	6.49541	0.0502251	0.0188929	0.0669366	0.00947155	0.535253	1.75471	0.376165
26	3	1	0	8.07847	8.0977	9.37136	0.0539431	0.0301075	0.0483961	0.0150761	0.72708	2.22757	0.558134	0.311514	0.148252	7.97132	7.98508	8.91215	0.0356516	0.0167189	0.0380417	0.008366	0.699426	1.73797	0.468953	0.219917	0.0909166	7.99767	8.01528	9.22601	0.0446259	0.0237149	0.0419511	0.0118471	0.616268	2.24352	0.531416	0.282403	0.114353	7.36253	7.38783	8.65771	0.0408457	0.0249721	0.0334234	0.0124931	1.00415	2.23748	0.611378
26	4	1	0	9.64578	9.66664	10.3569	0.0374414	0.0237789	0.029497	0.0118975	0.613744	3.02552	0.635097	0.403348	0.0756743	7.46269	7.4712	8.42559	0.0420084	0.014991	0.0589677	0.00750935	0.417646	1.47473	0.356857	0.127347	0.113376	7.36746	7.37236	7.8173	0.0425848	0.0114507	0.079202	0.0057265	0.449749	0.952089	0.268891	0.0723025	0.109215	9.25634	9.27029	10.259	0.0561094	0.0285448	0.0552229	0.0142923	0.615768	2.42829	0.508735
26	1	1	0	7.77223	7.77682	8.37281	0.0605622	0.0161787	0.113375	0.00809101	0.365789	1.17839	0.267142	0.071365	0.164264	7.65579	7.66873	8.57997	0.0360611	0.0160724	0.0404563	0.00803657	0.520827	1.93305	0.4457	0.198648	0.0904429	7.31397	7.33086	8.17749	0.0439708	0.0218807	0.0441996	0.0109449	0.510395	2.34683	0.497618	0.247624	0.116468	7.24838	7.27149	8.26567	0.0494464	0.0286628	0.0426934	0.0143459	0.962128	1.94073	0.579674
26	2	1	0	6.27569	6.33053	7.889	0.039258	0.0326603	0.0236182	0.0163467	1.31538	3.12568	0.83194	0.692124	0.097917	6.3405	6.36156	7.31859	0.0539816	0.0279348	0.0521695	0.0139707	0.824751	2.06725	0.517489	0.267795	0.147932	7.93341	7.97964	9.32035	0.0364072	0.0312465	0.0212155	0.0156272	1.10576	3.46817	0.858251	0.736594	0.0967107	5.58422	5.62772	7.23981	0.0465248	0.0325098	0.0333325	0.0162752	1.03967	3.12828	0.698762
26	3	1	0	7.66031	7.68164	8.751	0.0433234	0.0247978	0.0378322	0.0123948	1.03127	2.15034	0.572387	0.327626	0.111375	7.76194	7.79278	9.36875	0.0535477	0.0371122	0.0386239	0.0185527	0.848143	2.93507	0.693068	0.480343	0.146516	7.39088	7.42041	8.56941	0.0461173	0.0305148	0.0348316	0.0152499	0.985964	2.37908	0.661678	0.437818	0.121588	6.3358	6.37392	8.44263	0.0367848	0.0256199	0.0264197	0.0128159	0.806207	3.31343	0.696482
26	4	1	0	8.97601	9.07013	11.3175	0.0339756	0.0443094	0.0130488	0.0221935	2.08971	5.03926	1.30415	1.70081	0.0872824	8.01876	8.03671	8.99146	0.0362879	0.0194923	0.033761	0.00974128	0.968194	1.71629	0.537156	0.288537	0.0812991	7.6367	7.64542	8.62019	0.054775	0.0200089	0.0749452	0.0100005	0.532851	1.54487	0.365292	0.133438	0.154273	7.56207	7.57768	8.58513	0.0344664	0.0167626	0.0354019	0.00837367	0.638581	2.02348	0.486345
26	1	1	0	7.54296	7.5554	8.20401	0.0393557	0.0170639	0.0455463	0.00856234	0.519672	1.69406	0.433581	0.187992	0.101399	7.89438	7.91164	9.06378	0.0529047	0.0276468	0.0506441	0.0138303	0.788313	2.48975	0.522578	0.273088	0.126918	7.35339	7.36367	8.21097	0.040284	0.0156766	0.0518316	0.00784938	0.488636	1.383	0.389153	0.15144	0.0970949	7.22957	7.2474	8.31689	0.0414802	0.0210908	0.0408767	0.0105677	0.647722	2.16193	0.508456
26	2	1	0	6.55093	6.59092	7.90878	0.0518475	0.0376093	0.0357432	0.0188073	1.01001	3.02418	0.725383	0.52618	0.154816	6.28765	6.32308	8.27876	0.0371202	0.0248261	0.0277765	0.0124243	0.508741	3.06624	0.668803	0.447297	0.102595	8.07693	8.08851	8.79599	0.0552064	0.0238991	0.0637333	0.011944	0.624928	1.72237	0.432904	0.187406	0.156893	5.37722	5.39032	6.30278	0.0596762	0.0224252	0.0794568	0.0112203	0.573619	1.6034	0.375782
26	3	1	0	8.39547	8.42416	9.66179	0.0397073	0.0276037	0.0285745	0.0138093	0.857367	3.08841	0.695178	0.483273	0.0999691	8.23997	8.25193	9.33899	0.0417025	0.0185326	0.0469535	0.00927296	0.564519	2.001	0.444401	0.197492	0.0882583	7.78525	7.79603	8.62745	0.0455424	0.0186753	0.0555471	0.00934038	0.680899	1.44449	0.410064	0.168152	0.111687	7.65593	7.67767	8.65317	0.0520033	0.0300416	0.0449995	0.0150173	0.838555	2.60476	0.577686
26	4	1	0	9.63016	9.64738	10.5925	0.0484919	0.0279683	0.0421994	0.0140378	0.79903	3.01085	0.576762	0.332655	0.102579	7.57348	7.57753	8.11498	0.0450269	0.0111571	0.0912202	0.00560079	0.393877	0.894968	0.247787	0.0613986	0.129592	7.35675	7.36035	7.77016	0.0638429	0.0147075	0.138806	0.00736654	0.367284	0.898166	0.230371	0.0530708	0.185345	8.18612	8.20677	9.23305	0.0468149	0.027262	0.0401484	0.013615	0.841338	2.21343	0.582337
26	1	1	0	7.44413	7.47229	8.63862	0.044251	0.0286928	0.0341158	0.0143435	0.893604	2.78678	0.648411	0.420437	0.122857	7.58715	7.5998	8.25748	0.047974	0.0210437	0.0546766	0.0105204	0.748964	1.45271	0.438647	0.192411	0.119013	7.23185	7.26052	8.59824	0.0533123	0.0343847	0.0413297	0.0171924	0.861611	2.79664	0.644967	0.415982	0.146803	6.80627	6.82937	7.85642	0.0531078	0.0298234	0.0472817	0.0149104	0.852576	2.21559	0.561563
26	2	1	0	6.74511	6.77987	8.45535	0.0537249	0.0368581	0.0391615	0.0184321	0.851508	2.99421	0.686053	0.470669	0.142887	6.36991	6.38892	7.63351	0.0535297	0.0263795	0.0544358	0.0132199	0.506702	2.52475	0.492802	0.242853	0.156044	7.64772	7.66475	8.59356	0.0524514	0.0268039	0.051295	0.0133954	0.642888	2.22456	0.511023	0.261144	0.131516	5.30987	5.35264	6.95173	0.0392915	0.0265505	0.0291064	0.0132904	0.983468	2.68657	0.675731
26	3	1	0	8.12037	8.13992	9.17411	0.0213719	0.0120588	0.018985	0.00604411	0.878163	2.03255	0.564236	0.318363	0.0425307	8.16401	8.16924	8.76547	0.0547241	0.0160168	0.0935002	0.00800956	0.449566	1.04969	0.292683	0.0856635	0.147416	7.9274	7.93297	8.54938	0.0407063	0.0121098	0.0684732	0.00605998	0.457256	1.105	0.297492	0.0885015	0.109222	7.71155	7.72386	8.45278	0.0390664	0.0170398	0.0447319	0.00851022	0.396177	2.23998	0.436176
26	4	1	0	10.0277	10.0515	11.1243	0.0522402	0.0361908	0.0378585	0.0181698	0.883757	2.64116	0.692777	0.479939	0.14668	7.57508	7.58835	8.21447	0.0490512	0.0220159	0.0545782	0.010995	0.762766	1.4614	0.448836	0.201454	0.120277	7.29982	7.30509	7.95143	0.0523313	0.014534	0.0942026	0.00726624	0.427986	1.13181	0.27773	0.0771341	0.12427	7.99643	8.01552	9.20924	0.035945	0.0198899	0.0325031	0.00995209	0.65446	2.0783	0.553343
26	1	1	0	7.60462	7.61785	8.46345	0.0768576	0.0345217	0.0855886	0.0172674	0.505156	1.87801	0.449164	0.201749	0.24282	7.67559	7.69226	8.88801	0.0488024	0.0247277	0.0481871	0.0123714	0.735223	2.00884	0.506691	0.256736	0.119731	7.55142	7.56798	8.25044	0.0383386	0.019203	0.0382934	0.0096071	1.0129	1.52094	0.500881	0.250881	0.0908629	6.89115	6.92016	7.46825	0.0269293	0.0170637	0.0213227	0.00856133	0.649179	2.24191	0.63365
26	2	1	0	6.81215	6.84506	8.16184	0.0379839	0.0254799	0.0282998	0.0127345	0.993741	2.57031	0.670809	0.449985	0.0947278	5.89475	5.91944	6.97716	0.056299	0.0304217	0.0521386	0.0152239	0.672688	2.27384	0.540359	0.291988	0.156433	7.974	7.98431	8.79878	0.0379575	0.0154023	0.0467975	0.00770544	0.638744	1.57209	0.405777	0.164655	0.0948751	5.21599	5.23898	6.03208	0.0422856	0.0207424	0.0431201	0.0103756	0.665227	1.81284	0.490532
26	3	1	0	8.04763	8.08589	9.59312	0.0259929	0.0204377	0.016516	0.0102108	1.3915	2.46721	0.786281	0.618238	0.0558757	7.35129	7.40518	8.39527	0.0155298	0.0138593	0.00872218	0.00694661	1.42299	2.7389	0.89243	0.796431	0.025205	7.29238	7.36341	8.46747	0.0125402	0.0128043	0.00614066	0.00640199	2.09165	3.01191	1.02106	1.04256	0.0171093	7.18072	7.26658	8.72668	0.0205707	0.0229282	0.00922958	0.0114664	2.05688	3.76776	1.11461
26	4	1	0	10.339	10.3673	11.5029	0.0408872	0.0313114	0.0266934	0.0156544	0.727143	3.4846	0.765801	0.586452	0.0982608	7.85209	7.86391	8.70099	0.0438867	0.018931	0.0508986	0.00947083	0.706627	1.57779	0.431361	0.186073	0.111727	7.23649	7.23899	7.77749	0.0312529	0.00593859	0.0828555	0.00299163	0.233328	0.992503	0.190017	0.0361066	0.0865765	7.18574	7.1944	7.91829	0.0526599	0.0185939	0.0746548	0.00930767	0.488867	1.37712	0.353095
27	1	1	0	6.83358	6.85023	7.95022	0.046321	0.0221309	0.0485056	0.0110723	0.652568	1.97732	0.477773	0.228267	0.112913	6.14093	6.17025	7.74773	0.0456049	0.0274239	0.0379704	0.0137303	0.684979	2.39603	0.601337	0.361606	0.112944	6.71894	6.73566	7.45516	0.0526261	0.0249801	0.0554119	0.012485	0.881081	1.62076	0.474671	0.225312	0.137438	6.73133	6.74729	7.81416	0.058116	0.0269704	0.0627583	0.0135162	0.70845	2.01463	0.464079
27	2	1	0	6.9785	7.03636	9.30099	0.0527545	0.047523	0.0292889	0.0237679	1.04276	4.28769	0.900832	0.811498	0.144378	6.62377	6.63705	7.56483	0.0560686	0.0235414	0.0668481	0.0117846	0.46839	2.12085	0.419867	0.176289	0.187293	6.65785	6.67225	7.59574	0.0506575	0.0221997	0.0578779	0.0111152	0.604068	2.25399	0.438231	0.192046	0.140979	6.02082	6.06657	7.52116	0.0488986	0.0363763	0.0328651	0.0181878	0.853909	3.80758	0.743912
27	3	1	0	5.62697	5.68689	7.12373	0.0489616	0.0403506	0.0296737	0.0201539	1.35457	3.08919	0.824127	0.679186	0.12228	4.7862	4.81941	6.23828	0.0646083	0.0365255	0.0572506	0.0182977	0.813223	2.70867	0.565338	0.319607	0.167768	6.00942	6.05314	7.34955	0.0521139	0.0378792	0.0358413	0.0189355	0.941633	2.80694	0.726853	0.528316	0.135869	5.19243	5.21452	6.11259	0.0512527	0.0245942	0.0534155	0.0122998	0.856704	1.6564	0.47986
27	4	1	0	8.8238	8.92868	10.8297	0.0421511	0.0575696	0.0154939	0.028902	1.7363	5.47573	1.36579	1.86538	0.0995295	7.34766	7.39241	8.86296	0.0494693	0.0402127	0.0304071	0.0200923	0.633229	4.02215	0.812882	0.660777	0.112827	7.12071	7.12368	7.55433	0.0441506	0.00909275	0.107143	0.00454445	0.274354	0.802859	0.205949	0.0424149	0.103882	6.82073	6.8626	7.66679	0.0321123	0.0243289	0.0212234	0.0121819	0.408194	3.2425	0.757619
27	1	1	0	6.79674	6.81931	7.90341	0.0656661	0.036426	0.0592714	0.0182383	0.933466	2.00375	0.554715	0.307708	0.1862	6.41504	6.44339	7.88928	0.0454486	0.0274632	0.0376611	0.0137516	0.926635	2.37701	0.604269	0.36514	0.120479	6.89999	6.90704	7.40948	0.0519546	0.0162235	0.0831149	0.00810441	0.300703	1.44025	0.312264	0.0975085	0.13765	6.7324	6.74699	7.69637	0.0409029	0.0181517	0.0461436	0.00908732	0.689329	1.67078	0.443774
27	2	1	0	6.56388	6.64416	8.87942	0.04929	0.0507813	0.0239315	0.0254015	1.55549	4.37135	1.03026	1.06143	0.126394	6.87673	6.93384	8.08259	0.0331987	0.0294986	0.018689	0.0147553	1.16741	3.03801	0.888547	0.789515	0.0804878	6.51687	6.52722	7.1924	0.0443705	0.0163099	0.060356	0.00815522	0.285013	1.64545	0.367585	0.135118	0.121482	5.30327	5.366	7.51352	0.0483636	0.0395898	0.0295456	0.0197981	1.01006	3.94952	0.818587
27	3	1	0	5.40141	5.43756	6.85369	0.0680723	0.0426512	0.0544623	0.0213805	0.963732	2.41522	0.626557	0.392574	0.202134	5.03963	5.09716	6.68283	0.0602803	0.0460782	0.0394178	0.023032	1.08427	2.99767	0.764398	0.584305	0.179735	6.04686	6.10415	7.68624	0.0527452	0.0440482	0.031629	0.0220585	1.52371	2.91223	0.835113	0.697414	0.138166	6.02771	6.06161	7.18746	0.0603538	0.0386741	0.0471777	0.0193717	0.990945	2.1688	0.64079
27	4	1	0	8.06152	8.12301	10.1388	0.030369	0.0303268	0.0152124	0.0151701	1.23067	3.90273	0.998608	0.997218	0.0592184	7.07647	7.08501	7.86405	0.048518	0.0168855	0.0697762	0.00845143	0.492579	1.30081	0.348026	0.121122	0.11394	6.75331	6.76047	7.27872	0.0496765	0.0154657	0.0798548	0.00773991	0.45338	1.17676	0.311327	0.0969248	0.117191	6.90419	6.91903	7.67603	0.0370244	0.016791	0.0409934	0.00843118	0.649451	1.92012	0.453511
27	1	1	0	6.90134	6.92888	7.98874	0.0603366	0.0372656	0.0488367	0.0186294	0.67389	2.50176	0.617628	0.381464	0.169891	6.21203	6.23005	7.27124	0.0420624	0.0199326	0.0444139	0.0099738	0.681826	2.01257	0.473883	0.224565	0.0900982	7.45143	7.46357	8.12939	0.0572091	0.0243628	0.0673418	0.0122127	0.72663	1.54104	0.425856	0.181354	0.14776	7.1661	7.18951	7.89705	0.0457823	0.0265639	0.0395359	0.01331	0.692008	2.06289	0.580222
27	2	1	0	6.9046	6.9624	8.03981	0.0324105	0.0290372	0.018112	0.014538	1.51155	2.97712	0.89592	0.802672	0.0788289	7.24581	7.26581	8.28188	0.0470873	0.0253865	0.0437343	0.0127122	0.815221	2.0897	0.539138	0.29067	0.11598	6.92791	6.9416	7.82685	0.0535791	0.0233713	0.0614067	0.011684	0.266601	2.10623	0.436201	0.190272	0.155518	5.40557	5.48484	7.64625	0.0573034	0.0532813	0.0308506	0.0266718	1.16553	4.05846	0.929811
27	3	1	0	5.39004	5.41329	6.39688	0.0580999	0.0291373	0.0580268	0.0145941	0.777228	1.79511	0.501504	0.251506	0.156434	4.91697	4.95917	6.26423	0.0638527	0.0412538	0.0494791	0.0206534	0.955402	2.45246	0.646078	0.417416	0.180997	5.73298	5.75421	6.83018	0.0745237	0.0368274	0.0753752	0.018407	0.699227	1.88387	0.49417	0.244204	0.219311	5.41817	5.45374	7.21007	0.0602541	0.0374983	0.0484597	0.0187686	0.814142	2.85044	0.622336
27	4	1	0	6.67933	6.71373	7.9464	0.0532178	0.0361852	0.0390856	0.0180702	0.872193	2.78764	0.679945	0.462325	0.104444	6.71828	6.75118	7.8237	0.0633518	0.0422493	0.0475406	0.0211439	1.20427	2.15239	0.666899	0.444755	0.149393	6.97661	7.04711	8.70315	0.0428211	0.042654	0.0215321	0.0213644	1.49172	3.2226	0.996099	0.992213	0.0759871	6.32267	6.32614	6.59689	0.0769409	0.016146	0.184193	0.00811123	0.378217	0.686954	0.209849
27	1	1	0	6.69084	6.73534	8.74847	0.0421048	0.0325793	0.0271916	0.01628	1.19179	3.23976	0.773767	0.598715	0.0819822	6.62008	6.6398	7.86246	0.0332206	0.0170073	0.0323896	0.00848911	0.713474	2.08231	0.511951	0.262093	0.0602292	6.84405	6.8619	7.89987	0.0476208	0.0235798	0.0481641	0.0118089	0.857493	2.01955	0.495158	0.245181	0.129091	6.97091	7.01243	8.50298	0.0341971	0.0260849	0.0224355	0.0130537	0.955554	2.60121	0.762779
27	2	1	0	6.6205	6.6506	8.05957	0.0752501	0.047587	0.0595909	0.023831	0.875943	2.72686	0.632385	0.39991	0.239385	7.39209	7.40912	8.68488	0.0585815	0.0294302	0.0582797	0.014709	0.632708	2.43002	0.50238	0.252386	0.158167	6.56764	6.58931	7.39459	0.0322979	0.01726	0.030258	0.00864122	0.79524	2.24535	0.534401	0.285584	0.0822167	5.24651	5.29947	6.85628	0.0707245	0.0528884	0.047271	0.0264347	1.05515	3.32948	0.747808
27	3	1	0	5.79452	5.82842	7.07064	0.0588256	0.0369513	0.0468872	0.0185004	0.785641	3.4921	0.62815	0.394573	0.178105	5.13365	5.19188	6.42852	0.0253353	0.0196602	0.0163194	0.00982716	1.43532	2.44774	0.776001	0.602178	0.0521476	5.25133	5.30272	6.90821	0.0545526	0.0402071	0.0371189	0.0201637	1.13093	2.80624	0.737034	0.543219	0.155996	5.3774	5.42718	6.51824	0.0457692	0.0335931	0.0311729	0.0167931	1.38438	2.65065	0.733968
27	4	1	0	7.57596	7.65845	9.52207	0.0287287	0.0322336	0.0128091	0.0161253	1.8446	3.90914	1.122	1.25889	0.0701212	6.77758	6.79471	7.48608	0.0367913	0.0177597	0.0381157	0.00888144	0.553545	1.94093	0.482714	0.233013	0.0745899	7.08098	7.08976	7.70318	0.0561485	0.0198319	0.0796342	0.00993464	0.511927	1.42087	0.353204	0.124753	0.152437	6.73201	6.74597	7.44364	0.0416474	0.0180796	0.0479785	0.00904167	0.520714	1.88059	0.434111
27	1	1	0	7.1048	7.1359	7.96228	0.0490895	0.0326927	0.0368972	0.0163651	0.744253	2.90982	0.665982	0.443532	0.128991	6.16301	6.19255	7.51519	0.0613632	0.0370986	0.0507849	0.0185623	0.938366	2.53705	0.604574	0.365509	0.182768	7.35433	7.37391	8.37468	0.059465	0.0319588	0.055296	0.0159717	0.885812	1.99367	0.537439	0.28884	0.170822	6.68266	6.69935	7.69466	0.0582754	0.0275632	0.0615764	0.0137754	0.646273	2.15216	0.472983
27	2	1	0	6.16857	6.19468	7.23865	0.0604456	0.0343663	0.0532153	0.0172018	0.791867	2.66981	0.568549	0.323248	0.184418	7.09674	7.12291	8.18309	0.0406086	0.0247882	0.0332523	0.0123901	0.773162	3.09772	0.610416	0.372608	0.083946	6.7554	6.77305	7.64341	0.0495586	0.0242374	0.0506279	0.0121094	0.736243	1.75011	0.489065	0.239185	0.127484	5.22503	5.27212	6.25151	0.0580165	0.0408222	0.0412133	0.0204045	0.892374	2.87238	0.703631
27	3	1	0	5.59555	5.64283	6.85924	0.0434376	0.0316912	0.0297647	0.0158434	1.16789	2.83712	0.72958	0.532287	0.113906	4.7131	4.72559	5.35766	0.0627028	0.0215461	0.0913805	0.0107899	0.561887	1.34688	0.343622	0.118076	0.157952	5.36758	5.37874	6.16052	0.0531621	0.0184243	0.0766358	0.00920465	0.380443	1.59544	0.346568	0.120109	0.134497	5.45515	5.51572	7.14681	0.0478173	0.0390113	0.0293124	0.0195102	1.04595	3.1432	0.81584
27	4	1	0	7.33983	7.34477	7.70512	0.0540448	0.0145848	0.100639	0.0073292	0.420534	1.07038	0.269864	0.0728266	0.135586	6.32369	6.35045	7.47243	0.0650047	0.0379027	0.0557178	0.0189428	0.96003	1.94609	0.583076	0.339978	0.170692	7.43758	7.45066	8.58542	0.0580861	0.025657	0.065707	0.0128197	0.509622	1.92321	0.441706	0.195104	0.144722	6.67581	6.71188	7.80887	0.0527553	0.0366996	0.037888	0.0183355	1.03873	2.59009	0.695657
28	1	1	0	6.74077	6.75874	7.63118	0.0588921	0.0290392	0.0598573	0.0145537	0.818967	1.94264	0.493092	0.243139	0.166497	7.01859	7.05036	8.04955	0.068298	0.0457121	0.0510034	0.0228478	1.07342	2.3232	0.669303	0.447967	0.170969	6.7658	6.79279	7.95695	0.06378	0.0386249	0.0526031	0.019292	0.782834	2.84569	0.605596	0.366747	0.167442	7.0232	7.05439	8.03645	0.060518	0.0401443	0.0457142	0.0201154	0.893058	3.19897	0.663344
28	2	1	0	5.25868	5.32989	6.96402	0.0572072	0.0497302	0.0328916	0.0248557	0.984629	3.62199	0.8693	0.755683	0.163505	6.18758	6.22975	7.5642	0.0501502	0.0363314	0.0346739	0.0181979	1.22637	2.49711	0.724453	0.524832	0.127126	6.4735	6.50713	7.40357	0.0446114	0.0295087	0.0337792	0.0147795	1.0191	2.30305	0.661462	0.437532	0.105097	4.38652	4.41936	5.46911	0.0752404	0.0405076	0.0700351	0.0202995	0.890177	1.84946	0.538375
28	3	1	0	4.68075	4.76558	6.4821	0.0496149	0.044461	0.0276581	0.0222104	1.1762	3.08894	0.896121	0.803033	0.129952	5.07387	5.15483	7.28267	0.0478794	0.0436197	0.026312	0.0218385	1.04111	3.47501	0.911032	0.82998	0.116473	4.62187	4.69634	6.97892	0.051875	0.043262	0.0311008	0.0216306	0.680794	3.6107	0.833966	0.695499	0.139556	5.9124	5.95189	7.7411	0.0439461	0.0301143	0.0321414	0.0150929	0.668256	2.62646	0.685257
28	4	1	0	6.10616	6.21477	7.99428	0.0393539	0.045573	0.0170185	0.0228224	1.17952	4.51764	1.15803	1.34104	0.0889334	7.20245	7.22397	8.20669	0.0774908	0.0432246	0.0696253	0.0216635	1.00068	1.79311	0.557804	0.311145	0.209216	6.3344	6.43096	8.3075	0.0366169	0.0406969	0.0164947	0.0203754	1.39713	4.39227	1.11143	1.23527	0.0729211	6.65995	6.70433	8.25524	0.0646259	0.0498216	0.0421184	0.0250319	0.866662	3.09668	0.770923
28	1	1	0	6.48961	6.51751	7.90314	0.0511033	0.0308202	0.0424114	0.0154261	0.67871	2.18214	0.603097	0.363726	0.137554	6.76813	6.78329	7.86675	0.0610655	0.0277118	0.0673149	0.0138627	0.571618	1.87217	0.453804	0.205939	0.162871	6.22405	6.24835	7.19574	0.0607093	0.0334621	0.0550832	0.0167346	0.842244	1.99532	0.551185	0.303805	0.169537	6.64148	6.66469	7.71773	0.0483877	0.0269184	0.0435399	0.0134746	0.887436	1.83446	0.556306
28	2	1	0	5.24769	5.3053	6.74369	0.0666546	0.0520361	0.0426845	0.0260147	1.12682	2.8167	0.780682	0.609464	0.182811	5.4963	5.54476	6.60486	0.0847356	0.0620528	0.0578665	0.0310326	1.24637	2.53244	0.732311	0.536279	0.262639	6.03745	6.07082	7.02551	0.0569556	0.036243	0.0448653	0.0181672	0.964051	2.19915	0.636339	0.404927	0.143569	4.87517	4.9529	6.82947	0.0760297	0.0665289	0.0433886	0.0332223	1.39248	3.54393	0.875038
28	3	1	0	5.00019	5.02617	6.07336	0.0728844	0.0372496	0.0713267	0.0186306	0.637721	1.94695	0.511078	0.261201	0.206554	4.94822	4.99751	6.13211	0.0682464	0.0478541	0.048794	0.0239909	1.099	2.47715	0.701196	0.491676	0.174832	4.55829	4.59789	5.75502	0.0595981	0.0359389	0.0494572	0.0179844	0.686464	2.30486	0.603022	0.363636	0.158282	4.90691	4.93383	5.67755	0.0590552	0.0304398	0.0574216	0.0152561	0.776862	2.04333	0.515447
28	4	1	0	5.2315	5.30837	6.60806	0.0473693	0.0426857	0.0262677	0.02133	1.5277	3.22423	0.901124	0.812025	0.120769	6.38833	6.48828	8.64472	0.0365127	0.0414686	0.0160829	0.020745	1.58969	4.6759	1.13573	1.28989	0.0688888	5.63723	5.70062	7.0088	0.0409668	0.0347722	0.0241459	0.0173958	1.22907	3.30419	0.84879	0.720445	0.0883257	5.88792	5.96478	7.8504	0.0688109	0.0657513	0.0360339	0.0329007	0.966336	4.61376	0.955536
28	1	1	0	6.24573	6.26099	7.24379	0.0905277	0.0395876	0.103855	0.0198602	0.564724	1.67583	0.437298	0.19123	0.283264	6.49172	6.527	8.2724	0.0532032	0.0360909	0.0392614	0.0180669	0.758735	2.64076	0.678359	0.460171	0.145414	6.69675	6.71225	7.53987	0.0576684	0.0263185	0.0630989	0.0131422	0.551281	1.89893	0.456377	0.20828	0.164135	6.42251	6.44589	7.46843	0.0615374	0.0337813	0.0562494	0.0169509	0.796804	2.26713	0.548956
28	2	1	0	5.75703	5.80198	7.20635	0.0889207	0.0641617	0.0616544	0.0321003	1.03754	2.99932	0.721561	0.52065	0.285073	5.61314	5.69463	7.97916	0.0710261	0.0682478	0.0369294	0.0340969	1.14874	4.12546	0.960885	0.923299	0.20545	5.31554	5.33294	6.1175	0.0709082	0.0305541	0.082185	0.0152594	0.603519	1.58033	0.430897	0.185672	0.207391	5.27489	5.31721	6.67778	0.0956993	0.0641392	0.0713443	0.0320471	0.993185	2.69476	0.670216
28	3	1	0	4.63116	4.65124	5.66461	0.0658279	0.028445	0.0761376	0.0142164	0.673234	1.66341	0.432111	0.18672	0.187316	6.2253	6.32732	7.60306	0.0351241	0.0397897	0.0154932	0.0198826	1.95482	3.56302	1.13283	1.28331	0.0783284	4.54607	4.63751	6.45737	0.0559243	0.0512993	0.0305058	0.0256687	0.985472	3.95443	0.917298	0.841436	0.144521	6.15068	6.17592	7.48911	0.0798294	0.044574	0.0716657	0.0223434	0.663134	2.88839	0.558366
28	4	1	0	6.51485	6.55049	7.38278	0.0478696	0.0327032	0.0350594	0.0163631	0.666089	2.44555	0.683172	0.466724	0.11747	6.7003	6.735	7.82473	0.0564399	0.0385813	0.0413757	0.0193342	0.718733	2.92298	0.683582	0.467284	0.136243	7.20202	7.21824	8.03354	0.0554943	0.0268717	0.0573451	0.0134459	0.476006	1.94139	0.484225	0.234473	0.149782	6.36231	6.44809	8.72348	0.042776	0.044891	0.0204179	0.022487	1.2175	3.99185	1.04945
28	1	1	0	6.10892	6.13611	7.55081	0.0706894	0.0408304	0.0611235	0.0203923	0.703498	2.37193	0.577602	0.333624	0.209303	5.89662	5.91761	6.95432	0.0751426	0.0374541	0.0754284	0.0187396	0.846514	2.00612	0.49844	0.248442	0.233695	6.51624	6.56735	7.6123	0.0381688	0.0312434	0.0233419	0.01564	1.60873	2.55474	0.818558	0.670038	0.0909355	6.14915	6.20169	8.19622	0.0510985	0.0412029	0.0317357	0.0206342	0.852869	3.65903	0.806343
28	2	1	0	4.83472	4.86876	5.76137	0.0858834	0.0494118	0.0745372	0.0246727	0.681174	2.31654	0.575336	0.331011	0.249934	5.81119	5.83493	6.70852	0.0816694	0.0429882	0.0776356	0.0215101	0.893818	2.06358	0.526369	0.277064	0.258766	5.25265	5.27099	5.92131	0.0740246	0.0325515	0.0843523	0.0163112	0.648238	1.52857	0.439738	0.19337	0.19728	4.40611	4.47975	6.25174	0.0890617	0.0721263	0.0550155	0.036082	1.169	3.40796	0.809846
28	3	1	0	4.35619	4.36424	4.82456	0.0667875	0.0177219	0.125865	0.00886209	0.418875	0.933874	0.265348	0.0704096	0.173378	4.2021	4.28641	5.82017	0.0541473	0.0458651	0.0319436	0.0229189	1.29605	2.82314	0.847042	0.71748	0.124808	5.12098	5.1565	6.42729	0.0641718	0.0388218	0.052949	0.0193786	0.87351	2.11874	0.604968	0.365986	0.180295	5.4006	5.44291	6.41498	0.0874177	0.0592942	0.0644457	0.0296497	1.01982	2.67272	0.678286
28	4	1	0	4.6508	4.74294	5.92718	0.0762608	0.071022	0.0409488	0.035516	1.56016	3.28786	0.931304	0.867328	0.215436	6.14568	6.20278	7.52997	0.0467637	0.0393065	0.0277941	0.0196365	0.856207	3.45911	0.840534	0.706498	0.119609	5.68651	5.77605	6.99314	0.0353392	0.0358391	0.0174115	0.0179076	1.68171	3.50963	1.01414	1.02849	0.0726838	5.17933	5.24112	6.61517	0.0408301	0.0327964	0.0254229	0.0164027	0.860559	3.27797	0.803241
28	1	1	0	6.17426	6.20523	7.47077	0.0725526	0.0449722	0.0586523	0.0225355	0.924711	2.74611	0.619857	0.384222	0.205643	5.73617	5.80405	7.29866	0.0431206	0.038201	0.024328	0.0190935	1.26806	3.40919	0.88591	0.784837	0.0929321	6.9444	6.97085	8.36655	0.063669	0.0386655	0.0525932	0.0193964	0.755774	2.47611	0.607289	0.3688	0.190579	6.23637	6.27325	7.69081	0.064538	0.0438774	0.0475375	0.0219728	0.718513	2.99845	0.679868
28	2	1	0	4.7494	4.78819	5.74294	0.0493942	0.030073	0.0405841	0.0150438	1.00841	2.12632	0.608836	0.370681	0.13149	5.91357	5.94538	6.99159	0.0760223	0.046741	0.0619258	0.0234092	1.11303	2.12746	0.614833	0.37802	0.216473	5.29572	5.33415	6.45111	0.0833491	0.0533238	0.0651515	0.0266665	1.139	2.30586	0.639765	0.409299	0.242214	4.67215	4.75775	6.58791	0.0661239	0.0594595	0.036768	0.0297301	1.22929	3.55547	0.899214
28	3	1	0	4.55121	4.59027	5.7946	0.0628903	0.0376258	0.0524994	0.0187913	0.752223	2.38178	0.598276	0.357934	0.163487	4.0217	4.04343	4.80373	0.0789788	0.0331035	0.0941081	0.0165331	0.710006	1.5519	0.419144	0.175682	0.231801	5.42589	5.44993	6.59931	0.0676285	0.0346216	0.0661176	0.0173281	0.626963	2.10123	0.511938	0.262081	0.21351	4.54085	4.55888	5.26496	0.0657031	0.0266503	0.0808989	0.01331	0.597386	1.54731	0.405618
28	4	1	0	5.62382	5.68312	7.00962	0.0593985	0.0487023	0.0362099	0.0243431	0.769484	3.17716	0.819925	0.672277	0.161098	5.67665	5.75556	7.0515	0.0478023	0.0454625	0.0250901	0.022694	1.2758	3.41593	0.951052	0.9045	0.12352	5.46686	5.49916	6.55919	0.053903	0.0321231	0.0454441	0.0161394	0.94346	2.05372	0.595943	0.355148	0.1599	5.57352	5.64404	6.8972	0.0498038	0.0443521	0.0280872	0.0222746	1.59089	3.04412	0.890536
29	1	1	0	6.57649	6.6169	8.07773	0.0780392	0.0570746	0.053292	0.0285051	1.11046	2.56868	0.731359	0.534886	0.214595	8.17224	8.18141	8.99267	0.0792531	0.030742	0.102197	0.0153769	0.440221	1.58767	0.387897	0.150464	0.23813	6.18882	6.21546	7.60068	0.0922081	0.0530958	0.0801057	0.0265611	0.626969	2.39654	0.575826	0.331576	0.277609	7.87816	7.90567	9.00455	0.0724125	0.0477934	0.0549153	0.0239222	1.07175	2.35893	0.660015
29	2	1	0	5.5557	5.58068	6.45955	0.0637889	0.0336876	0.0602986	0.0168173	0.766641	2.03191	0.528111	0.278901	0.181048	6.08877	6.10672	6.85932	0.0742001	0.0347625	0.0792093	0.0173856	0.814415	1.61313	0.468497	0.219489	0.225159	5.16408	5.19259	6.05563	0.0910759	0.0495626	0.0837965	0.0248157	0.801717	2.0649	0.54419	0.296142	0.288288	4.20296	4.32944	6.25673	0.0510394	0.0530946	0.0245564	0.0265739	1.42579	3.6269	1.04027
29	3	1	0	6.51794	6.57798	8.10366	0.0718503	0.0637953	0.0405624	0.0319774	1.28304	3.38452	0.887891	0.788351	0.195963	5.49197	5.51184	6.47593	0.0582672	0.0272838	0.0621755	0.0136327	0.57035	1.91402	0.468253	0.219261	0.168489	5.48654	5.53601	6.72181	0.0713576	0.0527607	0.0482935	0.0264015	1.08076	2.60385	0.739384	0.546689	0.183973	5.71761	5.75482	6.63105	0.0640135	0.0418768	0.0489487	0.0209481	1.05182	2.27837	0.654188
29	4	1	0	6.18839	6.24927	7.67119	0.0405665	0.0353438	0.0233671	0.0177377	1.55697	3.43378	0.871257	0.759088	0.0804046	6.54532	6.55754	7.35115	0.0814947	0.032644	0.10178	0.0163309	0.596398	1.50508	0.400566	0.160453	0.218608	6.78651	6.874	8.41291	0.0358503	0.0392423	0.0163607	0.0196031	2.02238	3.37116	1.09462	1.19818	0.0814923	5.87706	5.96367	7.11872	0.0455522	0.0461891	0.022474	0.0231068	1.78968	3.12395	1.01398
29	1	1	0	6.40079	6.44302	7.80355	0.0829163	0.0611438	0.0562282	0.0305759	1.24548	2.84319	0.737416	0.543782	0.24468	7.98983	8.00838	9.59471	0.0860761	0.0469441	0.0790095	0.0235004	0.543484	2.36985	0.545379	0.297438	0.23663	5.97662	5.99615	7.03795	0.0821323	0.0397596	0.0847554	0.019862	0.720438	1.83158	0.484092	0.234345	0.229352	7.23021	7.25834	8.40902	0.0875837	0.0559881	0.06859	0.0280289	1.00989	2.38359	0.639253
29	2	1	0	4.39927	4.45818	5.82958	0.0711593	0.0514617	0.0491753	0.0257189	0.941344	2.83303	0.72319	0.523004	0.192894	5.46966	5.50256	6.78871	0.0588014	0.0353672	0.048883	0.0176841	0.881972	2.41399	0.601469	0.361765	0.148411	5.06184	5.11231	6.23601	0.0681454	0.0488866	0.0474908	0.0244408	1.22431	2.50335	0.717387	0.514644	0.180423	3.63403	3.71878	5.31473	0.0843385	0.0666524	0.0534638	0.0333918	0.998601	3.0848	0.790297
29	3	1	0	5.67344	5.7079	6.6115	0.0897726	0.0563316	0.0715927	0.0281894	1.07567	2.5258	0.627493	0.393747	0.20598	5.44923	5.47	6.53834	0.0845736	0.0403558	0.0891275	0.0202933	0.688455	1.76406	0.477167	0.227689	0.249768	5.05856	5.08355	6.04161	0.0836573	0.0421938	0.0828092	0.0210653	0.902199	1.76032	0.504365	0.254384	0.263941	5.54892	5.5886	6.63183	0.0931185	0.0620205	0.0700114	0.0310575	1.15458	2.30306	0.666038
29	4	1	0	6.79204	6.85142	8.51634	0.0598743	0.0539363	0.0332497	0.0269817	1.2957	3.30674	0.900825	0.811486	0.164277	7.53697	7.62489	9.91581	0.0473483	0.0547164	0.0205135	0.0273947	1.66989	5.07501	1.15561	1.33544	0.121201	7.01027	7.07213	8.89297	0.0469429	0.043853	0.0251418	0.0219409	1.23009	3.78018	0.934178	0.872688	0.120079	6.64077	6.73267	8.83443	0.0449395	0.0498632	0.0202758	0.0249622	1.95727	3.97312	1.10956
29	1	1	0	6.84134	6.87495	8.10266	0.0792825	0.0538898	0.0584808	0.0270192	1.0089	2.67102	0.679719	0.462018	0.24371	7.64473	7.67857	9.29702	0.0844492	0.0608784	0.0585402	0.0304221	1.01597	3.11127	0.720888	0.519679	0.270694	6.68633	6.71295	7.89332	0.0650023	0.0388709	0.0543443	0.0194333	0.935589	2.22077	0.597993	0.357595	0.179028	8.30224	8.34256	10.0042	0.0474641	0.0389278	0.0289379	0.0194651	0.964852	3.10703	0.820152
29	2	1	0	4.61629	4.73464	6.87735	0.0542721	0.0571584	0.0257465	0.0285578	0.96663	4.55352	1.05318	1.10919	0.143204	5.42479	5.47304	6.64101	0.0606742	0.0440435	0.0417817	0.0220161	1.16259	2.4159	0.725902	0.526933	0.159051	5.51437	5.54981	6.79826	0.0772042	0.048401	0.0615325	0.0241842	1.07298	2.3861	0.626923	0.393032	0.232437	3.28726	3.34263	4.65767	0.0776964	0.0471285	0.0640711	0.0235737	0.772281	2.41435	0.606572
29	3	1	0	5.73612	5.78664	6.92025	0.0818234	0.0625862	0.0535916	0.0313545	1.06651	2.75233	0.764894	0.585063	0.215513	6.07277	6.09334	6.63028	0.0779383	0.0390876	0.0774347	0.0194766	0.721466	1.60631	0.50152	0.251522	0.189835	5.85338	5.86336	6.35137	0.114848	0.0393715	0.167163	0.0196452	0.628655	1.1003	0.342813	0.117521	0.332319	5.87789	5.95495	7.33644	0.083207	0.0796536	0.04337	0.0397448	1.3232	3.31994	0.957295
29	4	1	0	6.12564	6.23754	7.5247	0.0327259	0.0385309	0.0138908	0.0192559	1.84852	4.20025	1.17738	1.38623	0.0706994	6.72463	6.79591	8.56941	0.0570779	0.0560937	0.0290878	0.0280933	1.28754	4.02592	0.982756	0.96581	0.157786	6.26048	6.29841	7.34001	0.0490296	0.0338749	0.0355315	0.016961	1.01294	3.0122	0.690907	0.477352	0.119257	6.18385	6.23024	7.50595	0.0660078	0.0501414	0.043531	0.025119	1.14215	2.88683	0.759629
29	1	1	0	6.21685	6.22871	6.8504	0.0687906	0.026456	0.0895093	0.0132391	0.602768	1.40136	0.384587	0.147907	0.19183	7.74431	7.77525	9.44887	0.0577991	0.0400982	0.0417633	0.0201003	1.04383	2.67783	0.693751	0.481291	0.148325	6.03327	6.0809	7.62356	0.0415353	0.0315914	0.0272884	0.0157863	0.92405	2.75304	0.760592	0.5785	0.0956434	7.89427	7.91504	8.76805	0.0811531	0.0465704	0.0707828	0.0233097	0.837253	2.23613	0.573858
29	2	1	0	5.15604	5.18897	6.52116	0.0528257	0.0308672	0.0452836	0.0154613	1.01657	2.29105	0.584322	0.341432	0.127969	5.67905	5.69488	6.63785	0.0841912	0.0357653	0.0990626	0.0178772	0.546581	1.72257	0.42481	0.180464	0.247068	5.36328	5.37461	5.97732	0.0834902	0.0291573	0.119549	0.0145803	0.529388	1.30091	0.34923	0.121961	0.245921	4.15956	4.22879	6.62598	0.0416996	0.0318139	0.0273511	0.0159201	0.323251	3.92376	0.762931
29	3	1	0	5.78538	5.82766	6.94663	0.0928685	0.0652839	0.0660185	0.0326243	1.24889	2.24276	0.702971	0.494169	0.228841	6.26886	6.3123	7.1969	0.0576975	0.0427975	0.0389576	0.0214345	1.20022	2.50752	0.741756	0.550202	0.0539265	5.82616	5.83593	6.44705	0.122802	0.0415915	0.181867	0.0208619	0.538842	1.11901	0.338688	0.11471	0.311579	6.48773	6.53097	7.59892	0.0753431	0.0567197	0.0501832	0.0284407	0.954402	2.96631	0.752819
29	4	1	0	6.88047	6.90879	7.80897	0.0847481	0.0530102	0.0678011	0.0265275	1.06853	2.81653	0.625503	0.391254	0.23753	7.30987	7.39338	8.83267	0.0650665	0.072168	0.0293862	0.0361509	1.83215	4.13335	1.10914	1.2302	0.200686	6.48642	6.5579	8.53341	0.0660449	0.0638368	0.0341294	0.0318854	1.24599	4.01608	0.966566	0.934249	0.186993	5.90022	5.94851	7.08457	0.0511083	0.0386987	0.0337489	0.0193495	1.33966	2.65005	0.75719
29	1	1	0	6.60831	6.6409	7.91205	0.0832475	0.0547513	0.0632814	0.027373	0.948712	2.54005	0.657692	0.432559	0.273698	7.73847	7.75273	8.77532	0.0670765	0.0315544	0.0712949	0.0157775	0.65076	2.06417	0.470424	0.221299	0.206137	5.99253	6.01908	7.58418	0.0683279	0.0386176	0.0604803	0.0193191	0.781513	2.27266	0.56518	0.319429	0.199229	7.46367	7.48986	8.71998	0.0643451	0.0403033	0.0515027	0.020206	0.877059	3.07782	0.626362
29	2	1	0	4.50668	4.54382	5.50835	0.0502364	0.0291467	0.043278	0.0145683	0.935928	2.2365	0.580191	0.336622	0.135672	5.34725	5.38325	6.92739	0.0710005	0.0441668	0.0571616	0.0221194	1.02629	2.64996	0.622063	0.386962	0.213133	5.3745	5.39894	6.84062	0.0477666	0.0245304	0.0465745	0.0122832	0.713708	2.38052	0.513548	0.263731	0.126133	3.80466	3.8718	5.01656	0.0663518	0.0476717	0.0461904	0.0238433	1.14222	2.70831	0.718468
29	3	1	0	6.10334	6.18196	8.74556	0.0668262	0.065753	0.0339085	0.0328281	1.27956	4.6507	0.98394	0.968138	0.2012	5.49402	5.51164	7.14832	0.0701949	0.0309462	0.0800679	0.0155619	0.632539	2.29546	0.440861	0.194358	0.184709	5.26571	5.30327	7.25978	0.0457397	0.0288523	0.0362855	0.014438	0.570395	2.64241	0.630793	0.3979	0.0943286	5.70549	5.73528	7.0237	0.0517353	0.0302426	0.0442861	0.0151332	0.820329	2.09939	0.584564
29	4	1	0	7.08888	7.14551	8.30991	0.0600189	0.0539476	0.0333719	0.0269618	1.40541	2.81827	0.898843	0.807918	0.168185	7.40146	7.46209	8.71151	0.0624674	0.059372	0.0329435	0.0297595	1.57192	3.87303	0.950448	0.903351	0.138811	7.21206	7.24662	8.43439	0.0645854	0.0457095	0.0457007	0.0228911	1.0354	2.83301	0.707738	0.500893	0.175094	5.95021	6.01093	7.28466	0.0572016	0.0488053	0.0334981	0.0243858	1.41847	3.11026	0.853216
30	1	1	0	6.68845	6.71791	8.07338	0.0891606	0.0560966	0.0708361	0.0280403	1.02622	2.5665	0.629164	0.395847	0.285627	7.45534	7.47291	8.41621	0.0615699	0.0315681	0.0600292	0.0157805	0.925706	1.72063	0.512719	0.262881	0.178045	6.17	6.18962	7.00507	0.0525635	0.0259152	0.0534426	0.0129906	0.732524	1.75225	0.493027	0.243075	0.141748	7.29603	7.32564	8.94622	0.0875943	0.0576981	0.0663966	0.0288083	0.811665	2.9189	0.658697
30	2	1	0	4.75524	4.78801	5.82073	0.0588652	0.0329509	0.0525295	0.0164596	0.832924	2.06338	0.559768	0.31334	0.164993	6.79156	6.83673	8.40257	0.0794113	0.0623701	0.0505947	0.03121	0.942731	3.48909	0.785407	0.616864	0.249952	6.17933	6.22431	7.93848	0.072402	0.0541361	0.0484076	0.0270637	0.799018	3.37913	0.747716	0.559079	0.210142	4.36821	4.45768	5.61627	0.0563605	0.0501376	0.0316791	0.0250697	0.682379	3.85957	0.889587
30	3	1	0	4.95685	4.98247	6.03442	0.0801892	0.0405064	0.0794629	0.0202759	0.600336	1.89111	0.505135	0.255161	0.243036	4.50553	4.55412	5.98843	0.0833384	0.0553493	0.0628154	0.0277077	0.881862	3.02908	0.664151	0.441097	0.274906	5.68564	5.71162	6.95535	0.0974597	0.0530922	0.0894977	0.0265597	0.763322	2.73594	0.544761	0.296764	0.2864	5.19886	5.23344	6.49277	0.0864241	0.0519632	0.0719349	0.0260053	0.938929	2.34001	0.601258
30	4	1	0	6.76033	6.82533	8.49927	0.0423596	0.0398466	0.0225519	0.0199555	1.67509	3.68499	0.940674	0.884868	0.0988205	8.34336	8.41693	9.90495	0.0679241	0.0755041	0.0305338	0.0377288	1.46609	5.05934	1.1116	1.23564	0.189848	7.13329	7.18593	8.79316	0.0777351	0.06756	0.0446647	0.0337372	1.16463	4.11783	0.869105	0.755344	0.217066	7.23729	7.27175	8.35391	0.0760596	0.0538384	0.0538209	0.0269666	0.915436	3.23251	0.707844
30	1	1	0	6.96189	6.97751	7.71341	0.0594088	0.0277528	0.0638936	0.0139434	0.75219	1.84697	0.46715	0.218229	0.177136	7.57474	7.61578	9.08895	0.0678595	0.0536389	0.0429046	0.0268066	1.29446	3.32913	0.79044	0.624796	0.209777	6.05867	6.07985	7.2393	0.0993969	0.0504499	0.0981173	0.0252767	0.567045	2.22817	0.50756	0.257617	0.333024	6.97052	7.01312	8.70226	0.059336	0.0458503	0.0384553	0.0229617	0.829652	3.4523	0.772723
30	2	1	0	5.09872	5.12573	6.16956	0.0816911	0.0429681	0.0777729	0.0215164	0.754967	2.04074	0.525982	0.276657	0.240708	6.17448	6.27515	8.78116	0.0676306	0.0757748	0.0301486	0.0378469	1.75386	4.21689	1.12042	1.25535	0.203735	5.88033	5.93621	7.32147	0.0738931	0.060096	0.0453993	0.0300284	1.26853	3.44347	0.813283	0.661429	0.223162	4.4821	4.60022	6.3587	0.0594261	0.0616013	0.0286509	0.0307868	1.4174	4.32893	1.0366
30	3	1	0	5.04591	5.07215	5.63959	0.0831685	0.0429039	0.0807591	0.0214915	0.701952	1.97527	0.515867	0.266118	0.245772	4.77924	4.8289	6.32179	0.0908774	0.0628527	0.0656377	0.0313971	0.694747	3.03385	0.691621	0.47834	0.295678	5.54886	5.59584	7.44735	0.0801764	0.0580878	0.0552673	0.0290099	1.08753	2.92478	0.7245	0.524901	0.24124	4.91435	4.93122	5.69745	0.071063	0.0290004	0.0872629	0.0145329	0.652136	1.48204	0.408094
30	4	1	0	6.80236	6.87298	8.2664	0.0783013	0.0770404	0.0398077	0.038536	1.8255	3.37037	0.983896	0.968052	0.231524	8.36751	8.44183	10.0629	0.058137	0.0650525	0.0259825	0.0325315	1.67733	3.93522	1.11895	1.25205	0.144517	7.05625	7.0883	8.00267	0.0644134	0.0434177	0.0479681	0.0217938	0.655409	2.99956	0.674047	0.454339	0.171962	7.64505	7.66007	8.48813	0.0966437	0.0463858	0.100579	0.0231701	0.701705	1.8733	0.479967
30	1	1	0	6.32939	6.34621	7.5286	0.0654671	0.0302707	0.0711148	0.0152041	0.304005	2.4867	0.462381	0.213796	0.189064	7.40037	7.42867	8.41868	0.0869517	0.0563959	0.0670198	0.0281931	0.753321	2.69243	0.648589	0.420668	0.247474	6.15137	6.17435	7.20204	0.0896095	0.0477564	0.0840064	0.0238599	0.897727	1.984	0.53294	0.284025	0.275167	7.18579	7.20819	8.34232	0.0949	0.053961	0.08352	0.0270034	0.68534	2.39748	0.568609
30	2	1	0	5.46783	5.5144	7.42889	0.0620357	0.044421	0.0433796	0.0222423	0.737746	2.98836	0.716056	0.512736	0.174245	5.826	5.87437	6.95435	0.0496233	0.0373738	0.0329915	0.018714	1.48367	2.31869	0.75315	0.567235	0.126466	6.50255	6.5344	8.08854	0.0972257	0.062724	0.07527	0.0313276	0.929776	2.53517	0.645138	0.416203	0.292523	5.04532	5.20484	7.3453	0.0728788	0.0933037	0.0284906	0.0466979	1.92257	4.87431	1.28026
30	3	1	0	4.98859	5.01957	6.0357	0.0845268	0.0471142	0.075813	0.0235536	0.718318	2.35665	0.557387	0.310681	0.261466	4.91982	5.00573	6.75733	0.0656408	0.0606792	0.0355517	0.0303803	1.5672	3.04162	0.924413	0.854539	0.184732	6.06368	6.1019	7.66876	0.0833579	0.056901	0.0610689	0.0284554	0.975275	2.87512	0.68261	0.465956	0.246101	4.81491	4.84553	5.91703	0.0668861	0.0364162	0.0615256	0.0182379	0.756047	2.25746	0.544452
30	4	1	0	7.09809	7.13881	8.71117	0.0966601	0.0737214	0.0635015	0.0369383	1.09514	2.91126	0.762687	0.581692	0.301287	8.1678	8.18395	9.13101	0.0768965	0.039583	0.0746021	0.0197677	0.637647	1.98172	0.514757	0.264974	0.197177	7.20825	7.24399	8.53362	0.0775418	0.0558216	0.0539144	0.0279407	1.31626	2.19545	0.719891	0.518243	0.222322	7.94608	7.97104	9.09312	0.0828862	0.0523274	0.0657681	0.0262125	1.04646	2.66155	0.631316
30	1	1	0	6.22765	6.2463	7.57931	0.0686866	0.0331656	0.0712152	0.0166037	0.500615	2.05393	0.482854	0.233148	0.19106	7.30078	7.33148	8.88867	0.0556105	0.0373109	0.0414425	0.0186553	0.70336	3.33508	0.670932	0.450149	0.13653	5.81985	5.88032	8.03536	0.074493	0.0627283	0.0442919	0.0314066	0.95145	3.40712	0.84207	0.709082	0.211715	7.37466	7.39646	8.18601	0.0655969	0.0372694	0.0578491	0.0186739	0.683841	2.42303	0.568158
30	2	1	0	5.60677	5.6578	6.6822	0.0455172	0.0345695	0.0299757	0.0172904	1.65954	2.18507	0.759481	0.576812	0.099409	6.4093	6.45528	7.6925	0.0971077	0.074815	0.0629352	0.0373563	1.09957	3.0485	0.770434	0.593569	0.305693	6.74937	6.77461	8.25981	0.0758944	0.0444127	0.0647943	0.0221887	0.477993	2.40175	0.585191	0.342448	0.193689	4.17708	4.25964	5.68219	0.0632482	0.0528775	0.0378087	0.0264265	0.913503	3.1224	0.836033
30	3	1	0	5.14964	5.21469	7.13387	0.0802197	0.0659651	0.0487611	0.0329717	1.09717	3.02763	0.822306	0.676188	0.212911	5.40498	5.43635	6.7376	0.0713357	0.0416656	0.0609889	0.0208062	0.968413	2.37491	0.584078	0.341147	0.214026	6.20561	6.25851	7.84404	0.092253	0.0750238	0.0567047	0.0375022	0.986022	3.30013	0.81324	0.661359	0.267328	5.47543	5.59117	8.01761	0.0794043	0.0899954	0.0350515	0.0450255	1.27853	4.65869	1.13338
30	4	1	0	6.78704	6.82463	8.51682	0.0935841	0.0670075	0.0654587	0.0335591	1.05517	3.60167	0.716014	0.512676	0.301266	8.64891	8.68359	9.71063	0.0595274	0.0461969	0.0385437	0.0232137	1.15126	2.76061	0.776061	0.60227	0.166803	7.04227	7.07498	8.40392	0.0698277	0.047499	0.05136	0.0237651	0.841147	3.37427	0.680232	0.462715	0.18906	6.96481	7.00961	8.08135	0.0600588	0.0475656	0.0379745	0.0238191	1.1888	2.87379	0.791984
30	1	1	0	6.35163	6.38594	7.51235	0.0848863	0.0561854	0.0640682	0.0280682	1.16822	2.15617	0.66189	0.438099	0.25156	8.03671	8.06679	9.35782	0.0715449	0.0498577	0.0513801	0.0249518	0.788129	3.16114	0.696872	0.485631	0.205214	6.09226	6.10983	6.83651	0.0621237	0.0288039	0.0670639	0.0144171	0.722773	1.67659	0.463654	0.214975	0.179159	7.47231	7.50364	9.01679	0.0829516	0.0568987	0.0605191	0.0284739	1.10129	2.58635	0.685926
30	2	1	0	5.28981	5.32265	6.76769	0.0560507	0.0331172	0.0475184	0.0165885	0.831148	2.63044	0.590844	0.349096	0.152183	6.22531	6.28281	8.00678	0.0768496	0.0652287	0.045242	0.0325939	1.01071	3.64504	0.848784	0.720434	0.244122	6.53736	6.55747	7.65517	0.0890376	0.0457365	0.0866725	0.0228697	0.720168	2.00879	0.513676	0.263863	0.287767	4.18177	4.3016	5.74846	0.0672677	0.0678792	0.0332843	0.0338922	1.71211	3.64884	1.00909
30	3	1	0	5.8736	5.90518	7.10615	0.0681244	0.0415942	0.0558102	0.0208052	0.996703	2.05788	0.610562	0.372785	0.192117	5.83778	5.92563	8.10214	0.0693481	0.0705759	0.0340292	0.0352447	1.6963	3.87092	1.0177	1.03572	0.212554	6.34738	6.38098	7.51257	0.0706431	0.046246	0.0539436	0.0231179	0.889349	2.37035	0.654643	0.428557	0.199216	5.68698	5.70501	6.82116	0.072317	0.0328138	0.079667	0.0164025	0.7449	1.9784	0.453749
30	4	1	0	6.61855	6.73639	8.34906	0.0365776	0.0459369	0.0145597	0.022964	2.12045	3.85585	1.25588	1.57723	0.0948984	8.67215	8.70462	9.79086	0.060298	0.045343	0.0401907	0.0227269	1.13564	4.07817	0.751982	0.565477	0.132784	7.29556	7.34398	8.72534	0.0691851	0.0583127	0.0410642	0.0291719	0.893449	4.03546	0.84285	0.710396	0.18336	7.47244	7.4926	8.58947	0.0706461	0.0388401	0.064528	0.0195044	0.834851	2.4834	0.549784
32	1	1	0	6.24225	6.26251	7.29034	0.082779	0.0417072	0.0823176	0.0208966	0.703293	2.15903	0.503838	0.253853	0.258011	6.58507	6.64223	8.56904	0.0618297	0.0538258	0.0354815	0.0268899	1.06363	3.93487	0.870549	0.757856	0.190439	5.81078	5.85367	7.28552	0.0822525	0.0582499	0.0580486	0.0291128	0.864101	3.07197	0.708184	0.501524	0.266776	6.71855	6.74433	8.13649	0.0918008	0.054141	0.077897	0.0270944	0.900927	2.36433	0.589766
32	2	1	0	4.95728	5.03294	6.72469	0.0563266	0.0490153	0.0323642	0.0245076	1.2078	3.15248	0.870198	0.757245	0.162569	6.04758	6.09576	7.12408	0.079665	0.0609915	0.0521132	0.0305457	1.18624	2.6587	0.765599	0.586142	0.239623	5.65566	5.69559	6.93239	0.069128	0.046586	0.0513881	0.0233381	0.865128	2.81533	0.67391	0.454154	0.209546	4.76134	4.81375	5.94463	0.0741763	0.0525938	0.052314	0.0263001	0.9653	3.04394	0.709038
32	3	1	0	5.5031	5.54469	6.71338	0.0645867	0.0438205	0.0476703	0.021944	1.23038	2.24589	0.678476	0.460329	0.179524	5.12503	5.18316	7.07012	0.0537291	0.0416275	0.0346757	0.0208146	1.0223	3.02532	0.774766	0.600263	0.13931	4.65544	4.71878	6.12593	0.078245	0.060349	0.050744	0.0301865	1.22987	3.29508	0.771283	0.594877	0.227459	5.19653	5.2486	6.72603	0.0722375	0.0533184	0.0489672	0.0266768	1.0384	2.91809	0.738099
32	4	1	0	6.63854	6.70689	8.71022	0.0507236	0.0484811	0.0265183	0.0242253	1.56163	3.88658	0.955789	0.913532	0.146506	6.6253	6.68638	7.92646	0.0590803	0.0533107	0.032723	0.0266439	1.30398	3.71215	0.902344	0.814224	0.170284	6.49327	6.5676	8.50008	0.0583865	0.0575725	0.0296267	0.0288063	1.64004	3.84796	0.986058	0.972311	0.160069	6.50697	6.54286	7.58726	0.0556699	0.0381263	0.0406388	0.0190612	1.15426	2.65318	0.684863
32	1	1	0	6.24039	6.27173	7.76335	0.0593462	0.0372095	0.0472955	0.0185926	0.664753	2.38047	0.62699	0.393116	0.156189	6.3193	6.35613	8.09172	0.0585223	0.0400342	0.0427211	0.0199923	0.622886	2.95468	0.684085	0.467972	0.162834	5.35265	5.38891	6.28661	0.0493179	0.0308178	0.0393982	0.0153841	0.87024	2.18852	0.624881	0.390477	0.130845	6.32085	6.34095	7.04196	0.076584	0.0386805	0.0758569	0.019351	0.851935	1.69389	0.505073
32	2	1	0	4.9986	5.02986	6.29716	0.0600202	0.0336364	0.0536701	0.0168561	0.549246	2.37808	0.560418	0.314068	0.169801	5.93439	5.95904	6.86569	0.0672309	0.0364352	0.0620541	0.0182254	0.818104	1.99517	0.541942	0.293701	0.198967	5.36608	5.40256	6.42291	0.0782918	0.0491161	0.0623676	0.0245457	0.950724	2.52422	0.627347	0.393565	0.227022	4.57966	4.74755	7.69266	0.0641247	0.0803196	0.0256032	0.0401686	1.81149	5.15064	1.25255
32	3	1	0	5.39249	5.43873	6.52826	0.071946	0.0509611	0.0507828	0.0254789	1.19444	3.04313	0.708324	0.501723	0.186521	5.23398	5.28629	6.82456	0.0832007	0.0617786	0.0560657	0.0309115	1.00749	2.74278	0.742526	0.551344	0.263438	4.55017	4.59788	6.25324	0.058117	0.0384314	0.0439681	0.0192267	0.680816	2.80725	0.661278	0.437288	0.169326	5.16806	5.21097	6.24941	0.0776619	0.0518771	0.0581469	0.0259454	1.05327	2.41078	0.667986
32	4	1	0	6.76527	6.79115	7.65167	0.0439317	0.0260508	0.0370994	0.0130453	0.810744	2.16792	0.592984	0.35163	0.113777	7.06834	7.159	9.32849	0.0486743	0.0553347	0.0214032	0.0276614	1.80058	3.97312	1.13684	1.2924	0.14129	6.83863	6.87926	7.8162	0.0600966	0.0449104	0.0402311	0.0224676	1.02139	2.93194	0.747303	0.558463	0.152338	6.2671	6.34212	7.6982	0.0426856	0.0415567	0.0219457	0.0208003	1.24942	3.47239	0.973553
32	1	1	0	6.40596	6.43253	7.75639	0.0800101	0.0467825	0.0684916	0.0234161	0.931046	2.32896	0.584707	0.341882	0.237133	6.08083	6.11229	7.14813	0.0737621	0.0457308	0.0595731	0.0228983	0.925595	2.34774	0.619978	0.384372	0.242151	5.73159	5.76433	7.13168	0.0748051	0.0459399	0.060866	0.0229557	0.682953	2.62149	0.614127	0.377152	0.220372	5.75466	5.7787	6.55427	0.0754184	0.0397529	0.071559	0.0198814	0.818515	2.00133	0.527098
32	2	1	0	5.02385	5.08804	6.62793	0.0753293	0.0607469	0.0466823	0.030358	1.21161	3.45709	0.806418	0.65031	0.227759	5.9717	6.03056	7.9224	0.0730772	0.0614836	0.0434144	0.0307318	1.28139	3.65356	0.841352	0.707873	0.234692	5.29845	5.33935	6.52464	0.0854023	0.0563908	0.0647845	0.0282455	1.01124	2.51533	0.660296	0.435991	0.265572	4.92745	5.01734	6.68861	0.0596201	0.0564244	0.0314796	0.0281954	1.30792	3.66836	0.9464
32	3	1	0	5.53438	5.5654	6.49772	0.0535007	0.0314316	0.0455641	0.0157266	1.16988	1.88446	0.587498	0.345154	0.137986	4.77228	4.86246	6.2449	0.0607714	0.0567188	0.0325471	0.0283509	1.36196	2.97855	0.933313	0.871073	0.147371	4.72294	4.78756	6.04682	0.0938949	0.0737016	0.059827	0.036861	1.28807	3.21007	0.784938	0.616127	0.26294	5.25139	5.29144	6.46188	0.0865952	0.0563406	0.0665021	0.0281508	1.1191	2.27992	0.65062
32	4	1	0	6.63671	6.68952	8.33751	0.0456585	0.0383401	0.0272194	0.019193	1.3898	2.85374	0.839715	0.705122	0.108612	7.40501	7.47476	9.1219	0.0606001	0.0617947	0.0296883	0.0308703	1.31312	4.30511	1.01971	1.03981	0.164745	6.77433	6.83082	8.23761	0.0536557	0.0470887	0.0305452	0.0235259	1.1067	3.71701	0.877609	0.770198	0.157261	6.22702	6.27432	7.54414	0.0562821	0.0433253	0.0365965	0.0216861	1.18249	2.90895	0.769788
32	1	1	0	5.98538	6.00771	6.64615	0.0534589	0.0276955	0.051605	0.0138506	1.03007	1.52218	0.51807	0.268397	0.139289	6.20487	6.2283	7.37515	0.0702347	0.0379469	0.065118	0.0190087	0.767901	2.24181	0.540288	0.291911	0.180113	5.85919	5.87598	6.84022	0.0649736	0.0288736	0.0730329	0.0144227	0.714886	1.70749	0.444389	0.197482	0.193071	5.69544	5.7255	6.70261	0.0683628	0.0401019	0.0582821	0.0200551	1.11497	1.97957	0.586604
32	2	1	0	5.25838	5.34874	7.49253	0.0632967	0.062027	0.0323102	0.0310269	1.44323	4.1863	0.97994	0.960283	0.191093	5.86191	5.91784	7.51383	0.0763306	0.0620166	0.0469433	0.0309879	1.19327	3.14351	0.812474	0.660114	0.237001	5.17225	5.20109	6.2598	0.0793799	0.0434613	0.0724546	0.0217196	0.750777	2.37001	0.54751	0.299768	0.241829	4.66713	4.73753	6.01392	0.0675931	0.055051	0.0414849	0.027518	1.53237	2.73665	0.814448
32	3	1	0	5.25588	5.31882	6.96154	0.0825808	0.0674269	0.0505779	0.0337185	1.41553	2.97365	0.816495	0.666664	0.25196	5.01775	5.08572	7.72633	0.0678396	0.0562668	0.0408915	0.0281301	0.824585	4.22226	0.82941	0.68792	0.205107	5.14169	5.19353	6.33013	0.0855244	0.0626525	0.0584697	0.0313781	1.3227	2.45592	0.732569	0.536657	0.245892	5.20589	5.23666	6.35236	0.074934	0.0425178	0.0661264	0.0212891	0.619387	2.59878	0.567403
32	4	1	0	6.67716	6.74721	8.14756	0.0353636	0.0343294	0.0182017	0.0171527	1.47919	3.64248	0.970758	0.942371	0.0804571	7.53658	7.59844	9.63021	0.0509396	0.0493385	0.0262803	0.0246542	0.89513	4.45418	0.968569	0.938125	0.129778	6.92603	7.00155	7.92444	0.0438305	0.0449971	0.0213337	0.0224845	1.07538	4.42108	1.02662	1.05394	0.0910877	6.4394	6.47543	8.05237	0.07933	0.0541688	0.0580787	0.0270795	1.07361	2.8033	0.682829
32	1	1	0	6.15115	6.19883	7.56171	0.0572504	0.0439763	0.0372657	0.0219882	1.08125	2.78251	0.768139	0.590038	0.147781	6.6769	6.755	8.35375	0.0593482	0.0608421	0.0289486	0.0304243	1.54389	3.49609	1.02517	1.05098	0.161652	5.83485	5.87564	7.57979	0.0643669	0.0445324	0.0464882	0.022252	0.803975	2.94732	0.691852	0.47866	0.180804	5.89985	5.92895	7.0115	0.090289	0.0530152	0.0769357	0.0265253	0.914278	2.24071	0.587173
32	2	1	0	5.1269	5.21534	7.06638	0.0838923	0.0802993	0.0437967	0.0401255	1.40041	3.82491	0.957171	0.916176	0.254644	6.17451	6.23557	7.82154	0.0844822	0.073602	0.048464	0.0367848	1.45189	3.47715	0.871214	0.759013	0.264413	5.2364	5.2978	6.9086	0.0737234	0.0593361	0.0458434	0.0296964	1.15476	3.02684	0.804848	0.64778	0.215417	5.43152	5.51452	7.40682	0.0753637	0.0718941	0.0394526	0.0359036	1.1599	4.05292	0.953963
32	3	1	0	5.16986	5.22572	6.79999	0.0804106	0.0613309	0.052698	0.0306567	0.965768	3.11548	0.762721	0.581744	0.250667	5.00981	5.09434	7.31432	0.0586017	0.0542061	0.0316726	0.0270994	1.22237	4.02923	0.924991	0.855608	0.171836	4.62957	4.73271	7.28573	0.0536906	0.0528044	0.0272927	0.0263991	0.753755	4.57002	0.983494	0.96726	0.154918	5.82977	5.90169	8.15077	0.070109	0.0644572	0.0382042	0.0322928	1.05804	3.67605	0.919385
32	4	1	0	6.62969	6.68754	8.52206	0.0504816	0.0443572	0.0287085	0.0221652	1.23227	3.58446	0.878681	0.77208	0.1383	7.05343	7.12614	9.20052	0.0516196	0.0524694	0.0253591	0.026201	1.55924	4.45291	1.01646	1.0332	0.126461	6.94541	7.0054	8.47185	0.0642363	0.0588283	0.0351195	0.0294551	1.4355	3.88412	0.915811	0.838709	0.17158	6.52764	6.55625	7.92577	0.0627582	0.0384333	0.0512991	0.0192391	0.733152	2.9639	0.612403
33	1	1	0	6.49071	6.53519	7.70708	0.060417	0.0460448	0.0397634	0.0230955	1.23405	2.77406	0.762118	0.580823	0.165057	7.24854	7.2575	7.75349	0.0530887	0.0191532	0.0738786	0.0096161	0.517594	1.24376	0.360778	0.130161	0.12884	6.52164	6.57448	7.92035	0.0449541	0.0374419	0.0269577	0.0187007	0.679689	3.31579	0.832891	0.693708	0.130204	6.4224	6.46001	7.36227	0.0743314	0.0518037	0.053365	0.0259199	1.32549	2.65994	0.696929
33	2	1	0	4.49078	4.63993	6.7926	0.0494764	0.0578028	0.0212064	0.0289448	2.04609	4.08081	1.16829	1.36491	0.125945	6.54258	6.56902	7.99569	0.0905617	0.0533879	0.076954	0.026744	0.64816	2.6049	0.589519	0.347533	0.278092	5.66579	5.71964	7.05599	0.0787113	0.061697	0.0502647	0.0308828	1.0624	3.06612	0.783839	0.614404	0.251583	4.26141	4.30697	5.77889	0.0545114	0.0340964	0.0435316	0.0170313	0.838368	2.37598	0.625492
33	3	1	0	4.87378	4.91039	6.24045	0.0609064	0.0365026	0.0510225	0.0183267	0.963936	2.06229	0.599324	0.359189	0.169087	4.50211	4.58465	6.09956	0.068644	0.0595334	0.0395906	0.0297789	1.37094	3.08846	0.867279	0.752172	0.199981	3.56444	3.61164	5.24355	0.083335	0.0485738	0.0714918	0.0242888	0.782653	2.89532	0.582874	0.339742	0.233577	4.12054	4.25164	6.19539	0.0646609	0.0678403	0.0308068	0.0339109	1.79691	3.58995	1.04917
33	4	1	0	5.41037	5.44338	6.27411	0.0479874	0.0287658	0.0401454	0.0144255	0.877109	2.02679	0.599444	0.359333	0.119096	7.0774	7.10791	7.842	0.0700821	0.0461697	0.053285	0.0231263	0.97017	2.38518	0.658795	0.434011	0.186418	6.51472	6.55053	7.71084	0.0651323	0.0446153	0.0476054	0.0223374	0.75418	2.80331	0.684996	0.469219	0.195769	7.11852	7.14536	8.16383	0.0666352	0.0412907	0.0538413	0.0206734	1.02616	2.07326	0.619653
33	1	1	0	6.51338	6.5351	7.26792	0.0688966	0.0367277	0.064735	0.0183963	0.736372	1.93859	0.533084	0.284179	0.176726	7.67694	7.71361	8.5902	0.0493967	0.0371555	0.0327915	0.0185529	0.843374	2.9125	0.752186	0.565784	0.123373	6.88999	6.90163	7.46829	0.0886169	0.0355619	0.110584	0.0178085	0.649825	1.37975	0.401299	0.161041	0.270746	6.43606	6.48892	7.68244	0.0584733	0.0483939	0.0353055	0.0241829	1.38425	2.81284	0.827624
33	2	1	0	5.35119	5.394	6.74457	0.0900058	0.0611129	0.0663572	0.0305924	1.09218	2.71639	0.678989	0.461026	0.263373	6.91446	6.95282	8.2808	0.0925223	0.0675494	0.0633611	0.0337733	0.909688	2.88166	0.730088	0.533028	0.284361	6.46633	6.50942	8.44348	0.069552	0.0520627	0.0466737	0.026152	0.808198	2.94941	0.748543	0.560316	0.182175	5.17108	5.21417	6.62128	0.0729773	0.0488684	0.0544331	0.0244087	0.828786	2.81188	0.669639
33	3	1	0	5.47274	5.57811	6.98379	0.0704989	0.0761491	0.0326302	0.0380702	1.92147	3.70481	1.08015	1.16672	0.195885	4.9854	5.04161	6.4294	0.0681901	0.0512403	0.0454123	0.0256422	1.20329	2.61801	0.751434	0.564653	0.209484	4.98747	5.05079	6.56107	0.0608826	0.0485878	0.0381891	0.0243225	1.12072	3.1306	0.798058	0.636897	0.173492	5.66647	5.67824	6.30427	0.0715249	0.0261604	0.0981415	0.0131289	0.506074	1.35388	0.365752
33	4	1	0	6.67502	6.73631	8.81485	0.060113	0.0545683	0.0331294	0.0272997	0.876573	3.69956	0.907762	0.824032	0.148311	7.12456	7.16508	8.51027	0.0687523	0.0523847	0.0451404	0.026206	1.18917	3.26831	0.761934	0.580544	0.16787	6.68265	6.72923	8.17627	0.0562083	0.0444844	0.0355344	0.0222568	1.47623	2.62555	0.791421	0.626347	0.143292	6.93883	6.99189	8.40392	0.0590152	0.0508044	0.0342412	0.025376	1.23709	3.4725	0.86087
33	1	1	0	6.22323	6.30378	7.79352	0.048938	0.049225	0.0243746	0.0246613	0.930337	4.45799	1.00586	1.01176	0.100404	7.83964	7.89588	9.30047	0.0684991	0.0645236	0.0364284	0.0323227	1.21327	3.95029	0.941963	0.887294	0.180792	7.01751	7.04256	8.50962	0.0769287	0.0457142	0.0647934	0.02288	0.481153	2.75265	0.59424	0.353122	0.228588	6.65585	6.7353	7.83517	0.0649525	0.0670845	0.0314752	0.0335755	1.38209	4.10159	1.03282
33	2	1	0	5.16162	5.20491	6.58138	0.0632016	0.0423763	0.0471063	0.0211772	0.834477	2.50389	0.670494	0.449562	0.176582	6.58789	6.63284	8.00952	0.0666897	0.0514542	0.0431847	0.0257071	1.08729	3.12455	0.771546	0.595284	0.20142	6.65679	6.72036	8.0653	0.0530428	0.0489585	0.0287442	0.0244881	1.28836	3.94148	0.923001	0.851932	0.13991	5.29197	5.35485	7.56828	0.0721178	0.0590585	0.0440404	0.0295346	0.661911	4.3612	0.818917
33	3	1	0	5.24511	5.29183	8.28217	0.0659201	0.0463039	0.0470458	0.0232124	0.724424	4.19887	0.702425	0.4934	0.150729	5.78281	5.86215	8.40932	0.0699679	0.0673271	0.0364133	0.0337164	0.999162	4.21479	0.962256	0.925937	0.191654	4.97271	5.04617	6.94442	0.0660353	0.0567131	0.0384383	0.0283517	1.21888	3.52734	0.85883	0.737589	0.182783	5.85562	5.91627	7.22727	0.0679397	0.0574718	0.0401463	0.0287282	1.53893	2.78992	0.845924
33	4	1	0	6.11235	6.15467	7.14927	0.0635939	0.0458791	0.0440509	0.0229273	1.18034	3.09912	0.721439	0.520474	0.156606	7.65819	7.70062	9.20402	0.0663872	0.0536606	0.0411822	0.0269062	1.31056	2.85094	0.808298	0.653346	0.177448	6.54737	6.57697	7.75688	0.0659003	0.0411265	0.0529374	0.0206173	0.829501	3.04717	0.624071	0.389465	0.148319	7.45422	7.4786	8.59604	0.0731926	0.0442216	0.0607889	0.0221901	0.941335	2.78988	0.604181
33	1	1	0	6.35013	6.39012	7.62423	0.0558999	0.0399664	0.0390745	0.0199738	1.04404	2.39441	0.714964	0.511174	0.130845	7.60136	7.62465	8.44723	0.0870167	0.0519003	0.0730784	0.025997	0.743214	2.8651	0.59644	0.355741	0.203148	6.43701	6.46727	7.36183	0.0657654	0.0411618	0.052483	0.0205595	0.752542	2.24403	0.625888	0.391736	0.180059	6.32444	6.38723	8.25074	0.0530691	0.0474878	0.0296228	0.0237196	0.973159	3.37873	0.894831
33	2	1	0	5.03203	5.11092	7.35472	0.0879069	0.0787297	0.0490843	0.0393707	1.32226	3.68841	0.895603	0.802104	0.269942	6.74923	6.81282	8.13168	0.0643319	0.0598146	0.0345802	0.0298944	1.03221	3.91983	0.929782	0.864495	0.160194	6.24214	6.31707	7.47351	0.0505988	0.0491439	0.0260185	0.0245438	1.31715	3.23597	0.971248	0.943323	0.137011	4.91299	5.02927	6.99844	0.0781853	0.0841677	0.0362951	0.0420618	1.64777	3.90713	1.07652
33	3	1	0	5.30811	5.35888	6.59743	0.0751583	0.0553829	0.0509253	0.0276523	1.02796	2.82214	0.736884	0.542998	0.219603	5.67152	5.81031	8.98402	0.0654453	0.0827283	0.0259487	0.0414636	1.54069	5.34397	1.26408	1.5979	0.157337	4.78125	4.85609	6.50781	0.0867989	0.0738139	0.0509759	0.0368649	1.40477	3.09707	0.850402	0.723183	0.263207	5.60745	5.64798	6.8551	0.0763774	0.0516543	0.0565474	0.025864	1.03359	2.30646	0.676303
33	4	1	0	6.38488	6.43362	7.40476	0.0446051	0.0353165	0.0281374	0.0176388	1.2032	2.90267	0.791759	0.626883	0.0967593	8.11278	8.12302	8.89201	0.098674	0.0402954	0.12185	0.0203204	0.401968	1.63069	0.408369	0.166765	0.324889	7.02076	7.07393	8.50553	0.057496	0.0498588	0.0331519	0.0249297	1.43254	2.85245	0.86717	0.751984	0.156732	7.98634	8.0198	9.02617	0.0616253	0.0451728	0.0422011	0.0226756	1.04696	3.06265	0.733022
33	1	1	0	6.20196	6.30382	7.78566	0.0462468	0.0522781	0.0204628	0.0261481	1.14804	4.55034	1.13041	1.27784	0.0820175	7.76805	7.80924	8.67606	0.069554	0.0558046	0.0434217	0.0279514	0.728996	3.79267	0.802321	0.643719	0.135646	6.93541	6.95726	7.44669	0.0652096	0.0359809	0.0592826	0.0180488	0.515401	2.02905	0.551772	0.304453	0.167419	6.32986	6.38329	8.10379	0.0769674	0.0635307	0.0466577	0.031789	1.39401	3.33681	0.825423
33	2	1	0	5.2122	5.2534	6.2656	0.0696401	0.0457776	0.052903	0.0228595	0.8508	2.62989	0.657345	0.432103	0.203677	6.64625	6.69436	8.15768	0.0589241	0.047257	0.0368153	0.0236796	1.31109	2.8932	0.801998	0.6432	0.170395	6.77152	6.79841	7.86683	0.0825418	0.049916	0.0682947	0.0249758	1.05123	2.09207	0.604737	0.365706	0.238545	5.4827	5.54337	7.71447	0.0813164	0.0665763	0.0497849	0.0333718	1.13597	3.31238	0.818731
33	3	1	0	4.99818	5.02632	6.18525	0.0581391	0.0309104	0.0547013	0.0154622	0.791047	2.21949	0.531664	0.282666	0.159306	5.26033	5.43463	9.51012	0.0590421	0.0807014	0.0215671	0.0402931	0.767476	6.09349	1.36684	1.86826	0.144646	5.22562	5.3502	7.82704	0.074459	0.0855607	0.032376	0.0427501	1.75842	4.40836	1.1491	1.32042	0.223543	5.47873	5.53125	7.04673	0.0970096	0.0738552	0.0636992	0.0369204	1.17231	2.85632	0.761318
33	4	1	0	6.53167	6.61044	8.3218	0.0716543	0.0730618	0.0350517	0.0364423	0.864415	4.1622	1.01964	1.03967	0.169372	7.85449	7.8681	8.69343	0.0885114	0.0410378	0.0955763	0.0205457	0.660923	1.846	0.463644	0.214966	0.238566	6.38074	6.46354	7.62289	0.0382973	0.0395804	0.0185186	0.0197803	2.14522	2.84174	1.0335	1.06813	0.0628024	8.10253	8.11432	8.9209	0.0609685	0.0267243	0.0697003	0.0133917	0.656498	1.5119	0.438329
34	1	1	0	7.862	7.88202	9.06671	0.0769758	0.0432649	0.0685064	0.0216418	0.861522	2.09983	0.562059	0.31591	0.216642	7.20127	7.21197	8.00013	0.0929775	0.0365652	0.118002	0.0182503	0.692904	1.51082	0.393269	0.154661	0.280327	7.06823	7.08263	7.91905	0.0886911	0.0400835	0.0983919	0.020097	0.716334	1.74786	0.451945	0.204254	0.270904	6.85083	6.85765	7.51179	0.0653446	0.0200174	0.106549	0.00999875	0.527366	1.08688	0.306336
34	2	1	0	6.76578	6.86035	9.45031	0.061622	0.0700404	0.0270991	0.0350091	1.7246	4.28393	1.13661	1.29189	0.176726	6.68391	6.73627	8.28367	0.0831544	0.0697907	0.04956	0.0349105	0.872635	3.82081	0.839291	0.704409	0.231874	7.13092	7.15629	8.02983	0.0824663	0.0497094	0.0683454	0.0248333	0.991333	2.05261	0.602785	0.36335	0.238328	6.30708	6.32642	7.03856	0.0885598	0.0438217	0.089555	0.0219279	0.809993	1.87897	0.494827
34	3	1	0	6.27604	6.2844	7.1811	0.0823209	0.0267041	0.128148	0.0134848	0.2584	1.85864	0.32439	0.105229	0.134757	6.52399	6.56291	8.3011	0.0792067	0.0566162	0.0553983	0.0283044	0.769563	3.43045	0.71479	0.510925	0.215406	6.44823	6.46523	7.25505	0.0901837	0.0423228	0.0961303	0.0211716	0.732358	1.87737	0.469295	0.220238	0.275775	5.87179	5.88346	6.6393	0.0727008	0.0269672	0.0980945	0.013497	0.546071	1.37004	0.370934
34	4	1	0	7.31471	7.33942	8.1309	0.0537306	0.0323862	0.0448194	0.0162833	0.637896	2.34559	0.602751	0.363309	0.13022	7.89847	7.94118	9.75779	0.0860179	0.0708621	0.052186	0.0354164	1.16164	3.01739	0.823806	0.678657	0.258787	6.6745	6.70053	8.15073	0.0784446	0.0463609	0.0663337	0.0231692	0.899139	2.21244	0.591002	0.349283	0.230429	7.17718	7.19073	8.00945	0.0799033	0.035322	0.0908071	0.0177452	0.75742	1.46745	0.44206
34	1	1	0	8.32405	8.36311	10.2938	0.0724727	0.0585937	0.0448483	0.0293156	0.763881	3.47058	0.808493	0.653661	0.183503	7.01346	7.03309	7.84404	0.0614991	0.0323343	0.0584145	0.0161477	0.910288	1.80472	0.525769	0.276433	0.180388	7.12715	7.14554	7.78371	0.0777764	0.0399016	0.0758915	0.0199746	0.956055	1.75973	0.513029	0.263199	0.213094	7.16683	7.17756	8.052	0.0789534	0.0310114	0.100787	0.015549	0.563277	1.70487	0.392781
34	2	1	0	6.71187	6.76654	8.55496	0.0789454	0.0678375	0.0460187	0.0339798	1.21614	3.43007	0.859297	0.738391	0.231953	6.76748	6.80322	7.97733	0.0945995	0.0659522	0.0678364	0.0329719	0.944479	3.0651	0.697173	0.48605	0.288218	6.64543	6.67226	8.17387	0.0793443	0.0474774	0.0662775	0.0237305	0.823383	2.48894	0.598371	0.358048	0.226271	6.50669	6.53571	7.45465	0.0777526	0.04789	0.063224	0.0239851	0.934345	2.2653	0.615928
34	3	1	0	7.22003	7.22643	7.73813	0.0734376	0.0223724	0.120902	0.0112208	0.485679	1.01123	0.304646	0.092809	0.193834	6.57337	6.58726	7.28404	0.11375	0.0487236	0.132813	0.0243677	0.739013	1.47965	0.428339	0.183474	0.334102	6.5603	6.58598	7.77961	0.0706747	0.041151	0.0607799	0.0206059	0.830403	1.87053	0.582259	0.339026	0.199634	5.80259	5.81104	6.38411	0.0766498	0.0240555	0.122224	0.0120382	0.388902	1.26905	0.313836
34	4	1	0	8.05353	8.08599	9.25449	0.0888519	0.0643884	0.0613291	0.0322068	0.954694	2.79917	0.724671	0.525148	0.271516	7.84879	7.87958	9.24287	0.0804418	0.0560534	0.0578232	0.0280764	0.708051	3.09265	0.696819	0.485557	0.244926	6.5015	6.51329	7.61429	0.0721598	0.0283038	0.0921784	0.0141816	0.411121	1.68315	0.392237	0.15385	0.180921	7.2875	7.30051	8.40988	0.0631731	0.0275612	0.072403	0.0137812	0.59521	1.65796	0.43628
34	1	1	0	7.67756	7.74628	9.77856	0.0619471	0.0638516	0.0300032	0.0318764	1.52092	3.50284	1.03074	1.06243	0.197565	7.31634	7.34849	8.30638	0.0723283	0.0497169	0.0526215	0.024863	1.03486	2.79093	0.687378	0.472488	0.228084	6.58267	6.59265	7.42286	0.111263	0.0403878	0.153389	0.020211	0.527912	1.41647	0.362993	0.131764	0.334502	6.81882	6.83208	7.84406	0.0815788	0.0347471	0.0957894	0.0173781	0.549732	1.69967	0.425934
34	2	1	0	6.23118	6.27567	8.10684	0.07848	0.0586089	0.0525058	0.0292831	0.782944	3.58194	0.746801	0.557712	0.238005	7.01186	7.03923	8.36166	0.0982105	0.0609736	0.0791079	0.0304921	0.906432	2.57165	0.620846	0.38545	0.298473	6.5253	6.54373	7.89066	0.069188	0.0339892	0.0704557	0.0170034	0.450834	2.38727	0.491258	0.241334	0.202466	6.45448	6.48771	8.10097	0.0637794	0.0418792	0.0485874	0.0209488	0.65915	3.01928	0.656626
34	3	1	0	7.12059	7.13396	8.25112	0.0855361	0.0374055	0.0981001	0.0187604	0.583829	2.08032	0.437307	0.191238	0.239333	6.56878	6.58979	7.50573	0.0677218	0.0356614	0.0643204	0.0178357	0.813247	1.88728	0.526587	0.277294	0.174302	6.34986	6.35696	6.93899	0.0653557	0.0196612	0.108648	0.00983272	0.385766	1.29288	0.300834	0.0905009	0.177667	5.62265	5.66444	6.99682	0.0454004	0.03123	0.0329341	0.0155838	1.04562	2.38066	0.68788
34	4	1	0	7.7969	7.81537	9.21623	0.0774439	0.0416311	0.0719591	0.0207944	0.604842	2.76123	0.537565	0.288976	0.218218	7.9965	8.01337	9.07062	0.092575	0.0481666	0.0888789	0.0240604	0.857101	1.85848	0.520298	0.27071	0.283132	6.96853	6.99769	8.21809	0.0587685	0.0375414	0.0460882	0.018807	1.04255	2.05672	0.638801	0.408066	0.165797	7.00962	7.02264	7.75794	0.0656987	0.0281084	0.0768845	0.0140733	0.356256	1.93448	0.427838
34	1	1	0	7.26019	7.28478	8.16777	0.0675064	0.0404202	0.0564338	0.0202324	1.15933	1.90671	0.598761	0.358515	0.196548	7.36043	7.38725	8.957	0.0858827	0.0540898	0.0682044	0.027054	0.788161	2.71099	0.62981	0.396661	0.251484	6.62557	6.63532	7.42918	0.0725976	0.0261313	0.101145	0.0131046	0.546017	1.43814	0.359947	0.129562	0.19336	6.85331	6.86375	7.60692	0.101201	0.0383562	0.133754	0.0192135	0.507495	1.42466	0.379009
34	2	1	0	6.40844	6.45646	7.80234	0.0673564	0.0530026	0.042852	0.0265343	0.785341	3.53141	0.786898	0.619209	0.193985	6.35957	6.37452	7.11231	0.100104	0.0437249	0.114647	0.0218734	0.600147	1.77054	0.436793	0.190788	0.3183	6.65585	6.68474	7.84874	0.0715855	0.0444986	0.0575983	0.0222562	0.884903	2.58272	0.621614	0.386404	0.225149	6.32839	6.35179	7.19978	0.0482745	0.0263246	0.0443541	0.0131893	0.958452	1.94653	0.54531
34	3	1	0	6.71523	6.74207	7.63289	0.0830338	0.0499656	0.0689449	0.0249652	1.144	1.93308	0.60175	0.362103	0.252835	6.45364	6.50736	7.89221	0.0893008	0.0746051	0.0535744	0.0373925	0.905385	3.63154	0.835436	0.697954	0.269465	5.97215	6.0123	7.36208	0.0668584	0.046435	0.0482468	0.0232727	0.993607	2.60456	0.694527	0.482368	0.208727	5.33656	5.36457	6.86397	0.088572	0.0485592	0.0808834	0.0243114	0.646647	2.22954	0.548245
34	4	1	0	7.56822	7.62895	9.25098	0.0710129	0.0682911	0.036959	0.0341801	1.66133	3.76537	0.961671	0.924812	0.225102	7.97131	8.00849	9.58636	0.0688865	0.0531542	0.0447586	0.0266491	0.92565	3.08063	0.771619	0.595396	0.209212	6.26831	6.27913	7.05785	0.0561706	0.0207185	0.0763142	0.0103825	0.337367	1.52792	0.368849	0.13605	0.151374	7.17291	7.18868	8.16066	0.119707	0.0570175	0.12586	0.0285536	0.766772	1.87372	0.476307
34	1	1	0	7.66718	7.67704	8.40631	0.0823929	0.0320885	0.106263	0.0161176	0.606012	1.38433	0.389457	0.151677	0.223205	7.22417	7.23898	8.25392	0.0645077	0.0299012	0.0697923	0.0149955	0.600888	1.99563	0.463529	0.214859	0.167848	6.97475	6.98937	7.95604	0.100979	0.0456862	0.111583	0.0228403	0.584844	1.77869	0.452432	0.204695	0.295328	6.94835	6.96737	7.81764	0.0538009	0.0277237	0.0521573	0.0138497	0.943859	1.61637	0.515302
34	2	1	0	6.69271	6.75846	8.29721	0.066867	0.0629456	0.0355593	0.0315109	1.52664	3.31799	0.941356	0.88615	0.176847	6.6929	6.72846	8.10384	0.0849579	0.0587507	0.061342	0.0293344	0.797269	3.26362	0.691527	0.47821	0.295004	6.96099	6.97823	8.10855	0.093471	0.0458633	0.0951571	0.0229097	0.811164	2.01952	0.490669	0.240756	0.30754	6.25248	6.27173	7.18581	0.0717633	0.0352722	0.0729733	0.0176289	0.737299	1.9757	0.491508
34	3	1	0	6.63132	6.6616	7.53278	0.0460444	0.0292409	0.036219	0.0146072	0.778362	2.51195	0.635059	0.403301	0.0996965	6.14087	6.19064	7.5858	0.0697224	0.0546737	0.0444448	0.0273296	1.4319	2.65979	0.784163	0.614912	0.20511	5.89918	5.92637	7.0339	0.0851814	0.0483506	0.075092	0.024194	0.602176	2.77286	0.567619	0.322191	0.277293	5.25908	5.32286	7.0671	0.0529095	0.04351	0.0321914	0.0217696	1.12602	2.99805	0.822347
34	4	1	0	8.22039	8.27293	9.5608	0.0555135	0.0517523	0.0297555	0.02586	1.32825	3.21998	0.932247	0.869084	0.135293	7.36548	7.37617	8.43973	0.123676	0.0491732	0.155837	0.0246354	0.497636	1.78207	0.397598	0.158084	0.35295	6.7742	6.79925	7.48601	0.0701332	0.0409589	0.0600408	0.0204784	0.499309	2.13229	0.584016	0.341074	0.173269	7.34416	7.35632	8.21206	0.0746226	0.031594	0.0883629	0.0158394	0.54327	1.83496	0.423384
35	1	1	0	7.49593	7.5273	8.96024	0.0541933	0.0372509	0.0395198	0.0186722	0.457202	3.73728	0.68737	0.472477	0.100204	7.46657	7.48785	8.59397	0.0900133	0.050836	0.0795744	0.0253807	1.00714	2.05852	0.564761	0.318955	0.247429	7.24481	7.2866	8.24083	0.0379227	0.0295918	0.0243411	0.0148212	0.927289	3.17534	0.780318	0.608897	0.06299	6.46842	6.48294	7.33329	0.0754494	0.0327603	0.0868782	0.0163793	0.499491	2.26191	0.434202
35	2	1	0	3.30542	3.38533	4.95945	0.0604225	0.0442303	0.0412877	0.0221239	0.855108	2.83282	0.732016	0.535848	0.164226	7.11699	7.1356	8.01898	0.0621089	0.0320187	0.0602102	0.0160018	0.872798	1.78646	0.515525	0.265766	0.154231	4.77031	4.86259	7.22556	0.0424942	0.0401086	0.0225316	0.0200728	0.799209	3.90021	0.943862	0.890875	0.112271	2.92084	3.07039	4.68441	0.0672574	0.0637325	0.0355493	0.0319208	1.07661	4.05867	0.947592
35	3	1	0	5.70339	5.72474	6.9542	0.0576574	0.0285228	0.0583309	0.0142749	0.399668	1.7119	0.494695	0.244723	0.154929	4.87928	4.91314	5.84705	0.0547069	0.0315452	0.0475192	0.0157998	0.71753	2.2464	0.576622	0.332493	0.116624	5.70358	5.73042	6.80893	0.0475502	0.0263809	0.0428624	0.0131932	0.784625	2.01277	0.554801	0.307804	0.104826	3.73489	3.79684	4.99342	0.0546808	0.0374046	0.0401604	0.0187923	1.10684	2.41748	0.684054
35	4	1	0	5.90041	6.00809	7.36524	0.0553773	0.0628024	0.0243895	0.0313683	1.34531	4.24363	1.13408	1.28614	0.11815	6.74465	6.76445	7.38137	0.0827861	0.0428851	0.0801483	0.0215076	0.912263	1.59412	0.518023	0.268347	0.219754	6.43445	6.46097	7.57661	0.0822781	0.0481889	0.0704992	0.024183	0.97301	2.45023	0.585684	0.343025	0.224829	6.76147	6.78203	7.48656	0.0669049	0.0353581	0.0634654	0.0177255	0.7955	2.60298	0.528483
35	1	1	0	6.96895	6.98106	7.69833	0.077192	0.031769	0.0941718	0.0159509	0.613868	1.93916	0.411559	0.16938	0.246748	7.33992	7.36503	8.59319	0.0647778	0.0394073	0.0534301	0.0197736	0.962984	2.51321	0.608345	0.370084	0.193774	6.50457	6.53582	7.82984	0.0679364	0.0434127	0.0531431	0.0217008	0.980113	2.43308	0.63902	0.408346	0.191025	6.54865	6.57057	7.49868	0.0683421	0.0366872	0.0638224	0.0183918	0.843985	2.26017	0.536817
35	2	1	0	3.788	3.87428	5.39708	0.0594631	0.0483951	0.0365775	0.0242283	1.42457	2.98735	0.813869	0.662382	0.157116	7.12006	7.14683	8.25459	0.064989	0.0402054	0.0525163	0.0200994	0.91066	2.5458	0.618649	0.382727	0.193973	4.75716	4.81171	5.79923	0.0516367	0.0373432	0.0356884	0.0186653	1.11338	2.72966	0.723192	0.523007	0.137992	3.36822	3.47571	5.92749	0.0528221	0.045349	0.0307188	0.0226416	0.935363	3.37047	0.858523
35	3	1	0	5.85313	5.86369	6.53695	0.0901792	0.0317963	0.127898	0.0159003	0.548304	1.22684	0.352591	0.12432	0.255973	5.50481	5.55846	7.07502	0.0679975	0.0524908	0.0440455	0.0262472	0.921431	2.69199	0.771953	0.595911	0.186754	5.89471	5.91963	6.91708	0.0963501	0.0523801	0.088448	0.0261407	0.946303	1.82809	0.543644	0.295549	0.288544	3.91508	4.10155	6.85078	0.0818633	0.100285	0.0333873	0.050104	1.21977	4.33114	1.22503
35	4	1	0	6.4845	6.51626	7.62066	0.0699728	0.0450236	0.0546263	0.0226164	1.05122	2.82149	0.643445	0.414021	0.171262	7.22267	7.27067	9.29154	0.0700758	0.0585254	0.0419576	0.029266	0.854797	4.27871	0.835173	0.697513	0.194494	6.69136	6.72786	7.78409	0.0734398	0.0514642	0.0525202	0.0257913	1.02062	2.37461	0.700767	0.491074	0.200454	6.12455	6.18815	7.38356	0.0418467	0.0370779	0.0235728	0.0185062	0.97742	3.26177	0.88604
35	1	1	0	6.44878	6.48105	7.4813	0.061619	0.0398637	0.0477197	0.0199721	0.579714	3.28418	0.646939	0.41853	0.104919	7.26453	7.28658	7.99103	0.0506369	0.0287207	0.0446305	0.0143578	0.436537	2.09294	0.567189	0.321703	0.123273	6.87009	6.88905	7.51758	0.0623434	0.031894	0.0611401	0.0160016	0.380362	2.93054	0.511587	0.261721	0.114746	6.87884	6.92884	8.31244	0.0310499	0.0258363	0.0186841	0.0129364	1.27675	3.23122	0.832092
35	2	1	0	3.40157	3.42944	4.21728	0.0791944	0.034587	0.0908359	0.0173258	0.656332	1.88777	0.436735	0.190737	0.246973	7.30156	7.32756	8.77544	0.0776998	0.0479605	0.0629279	0.0239757	0.837722	2.91694	0.617254	0.381002	0.241766	4.49702	4.59768	6.30519	0.0536156	0.051341	0.0279663	0.0256437	1.55198	3.66857	0.957576	0.916951	0.151567	3.61171	3.83026	6.91573	0.0499829	0.0637978	0.0196096	0.0319476	1.56484	5.17936	1.27639
35	3	1	0	6.18958	6.25657	8.35678	0.0472611	0.043199	0.0258892	0.02163	1.36061	3.377	0.91405	0.835487	0.133804	5.91951	6.00712	8.21223	0.0681686	0.069755	0.0333258	0.0348949	1.4624	4.1209	1.02327	1.04708	0.200384	7.17615	7.26323	8.76894	0.0523268	0.0587385	0.0232982	0.0293575	1.53367	4.15414	1.12253	1.26007	0.151889	5.07043	5.1676	6.57859	0.052137	0.0520576	0.0260821	0.0260028	0.815205	4.12661	0.998478
35	4	1	0	6.24494	6.26447	6.91348	0.0522003	0.0258397	0.0526532	0.0129019	0.771243	2.05376	0.49501	0.245035	0.100743	7.16209	7.2747	8.49977	0.0303501	0.0387607	0.0118802	0.019377	1.5834	4.24561	1.27712	1.63103	0.0398027	6.00019	6.02881	7.23058	0.0552559	0.0324767	0.0469459	0.0162175	0.423498	2.39439	0.58775	0.345451	0.122619	6.06006	6.10421	7.22268	0.0557154	0.0408965	0.0379173	0.0204296	1.18422	2.5389	0.734026
35	1	1	0	6.71624	6.76599	8.43531	0.0472072	0.0387108	0.0287694	0.0193454	1.39736	2.69353	0.820018	0.672429	0.106147	7.59964	7.64002	9.41776	0.0459466	0.0360845	0.0292962	0.0180696	0.537167	3.17379	0.785358	0.616788	0.102	6.74561	6.76567	7.4948	0.0516808	0.0269384	0.0496216	0.013482	0.950396	1.85984	0.521245	0.271696	0.116621	6.84764	6.86145	7.54441	0.0692998	0.0301879	0.0795971	0.0151042	0.535729	1.74574	0.435613
35	2	1	0	3.79162	3.87081	6.32449	0.0523537	0.0408135	0.0336091	0.0204254	0.916345	3.97834	0.779573	0.607735	0.134187	7.17642	7.1994	8.32709	0.0393535	0.022638	0.0342524	0.0113344	0.804064	2.32231	0.575246	0.330908	0.0984686	4.79034	4.83388	6.27778	0.0689648	0.0446773	0.0532905	0.0223649	1.07457	2.67099	0.647827	0.419679	0.207593	3.61872	3.74058	5.81198	0.0824566	0.0781463	0.043501	0.039072	1.50354	3.90075	0.947726
35	3	1	0	5.56081	5.60397	7.21829	0.0635835	0.0441731	0.0457784	0.0220946	1.02013	2.6525	0.694726	0.482644	0.193286	4.81235	4.86146	6.8538	0.0465293	0.0320966	0.0337262	0.0160484	0.722823	2.99031	0.689814	0.475843	0.130529	5.83743	5.86558	6.73232	0.0732863	0.0420962	0.0638063	0.0210525	0.911358	2.01278	0.574407	0.329944	0.200576	4.43316	4.47749	6.34207	0.0685428	0.0431118	0.0545482	0.0215798	0.672354	2.88725	0.628976
35	4	1	0	6.41535	6.50479	8.16168	0.0419098	0.045107	0.0195278	0.022621	1.81581	3.78235	1.07629	1.1584	0.091421	7.43963	7.5862	9.96256	0.0578853	0.0860105	0.0194795	0.0430075	2.25167	4.99732	1.48588	2.20783	0.146347	6.78858	6.85987	8.23604	0.0371028	0.0366427	0.0187841	0.0183211	1.71136	3.10234	0.987598	0.975349	0.0817154	7.00162	7.04049	8.61191	0.0727052	0.05378	0.0492025	0.0269215	1.16851	2.85952	0.7397
35	1	1	0	6.50706	6.52361	7.44505	0.0513281	0.0238682	0.0553174	0.0119617	0.654375	1.81842	0.465013	0.216237	0.123401	7.02528	7.0474	8.24508	0.0760241	0.0424729	0.0682275	0.0212952	0.719318	2.3527	0.558677	0.31212	0.231677	6.70889	6.72251	8.02172	0.0707738	0.0303046	0.0830561	0.015228	0.375108	2.30308	0.42819	0.183346	0.194378	6.57277	6.64061	8.07485	0.0650167	0.0616345	0.0343011	0.0308252	1.46049	3.81582	0.94798
35	2	1	0	3.79689	3.84624	5.01395	0.0428938	0.026367	0.0349203	0.013195	0.909199	2.53688	0.614704	0.377861	0.117125	7.30378	7.32249	8.3781	0.059418	0.031117	0.0567484	0.0155637	0.583226	2.064	0.523697	0.274258	0.178037	5.20849	5.26588	7.03912	0.0495399	0.0384417	0.0319403	0.0192324	0.742694	3.50847	0.775974	0.602136	0.132973	3.3271	3.39473	5.50687	0.0645343	0.0435467	0.0478507	0.021788	0.945808	3.39099	0.674784
35	3	1	0	6.03884	6.06515	7.39469	0.0617098	0.0348552	0.0546151	0.0174237	0.422346	2.67159	0.564825	0.319027	0.188455	5.22048	5.25362	7.10794	0.05178	0.0305371	0.0438809	0.0152619	0.65901	2.89115	0.589747	0.347802	0.115306	5.85587	5.90471	7.95981	0.0653484	0.0495716	0.0430412	0.0247674	1.02393	3.38238	0.758574	0.575434	0.206424	4.61432	4.71282	5.87132	0.0496978	0.0476802	0.0260117	0.0239425	1.404	3.87883	0.959402
35	4	1	0	6.16296	6.24282	7.98045	0.0677724	0.0675213	0.0339933	0.0337419	1.66852	3.77925	0.996295	0.992603	0.191324	7.22006	7.28293	8.58969	0.0471462	0.0450611	0.0246473	0.0225154	1.28966	3.61833	0.955774	0.913504	0.123396	5.73363	5.80288	7.86947	0.0736887	0.0659259	0.0411621	0.0329465	1.38472	3.72904	0.894655	0.800408	0.21043	6.48557	6.51637	7.64556	0.0607623	0.0384896	0.0479412	0.0192365	0.994476	2.52097	0.633444
36	1	1	0	6.90715	6.9182	7.87842	0.0922512	0.0361191	0.117882	0.0180708	0.442429	1.79927	0.39153	0.153296	0.226967	6.51892	6.55164	7.40265	0.0922524	0.060433	0.0705076	0.0302572	1.15026	2.12494	0.655084	0.429135	0.258262	6.88546	6.91137	8.1267	0.0826987	0.0495174	0.0691194	0.024781	0.849553	2.43572	0.598769	0.358524	0.232071	7.61368	7.66494	8.96631	0.0511583	0.0453498	0.028874	0.0226896	1.4769	2.82221	0.88646
36	2	1	0	3.53146	3.58287	4.83194	0.0830586	0.05028	0.0686586	0.0251603	0.970988	2.3084	0.605355	0.366455	0.250701	6.81709	6.85954	8.33378	0.0803449	0.0612763	0.052745	0.0306796	1.16422	2.95951	0.762665	0.581658	0.24445	5.20915	5.25341	6.59299	0.0773222	0.0526723	0.056746	0.0263324	0.947811	2.80414	0.681205	0.464041	0.239526	4.20795	4.31541	6.54657	0.0850928	0.0815165	0.0443997	0.0407461	1.37938	3.78544	0.957972
36	3	1	0	4.53143	4.57496	5.54848	0.0616884	0.0388686	0.0489292	0.0194249	0.930717	2.41964	0.630079	0.397	0.172276	4.79931	4.88088	6.84582	0.0619266	0.0550727	0.0348018	0.0275245	1.1928	3.76044	0.889322	0.790893	0.181249	4.22639	4.24769	5.16583	0.0585584	0.0248973	0.0690032	0.0124737	0.608825	1.6688	0.425171	0.18077	0.173785	4.25135	4.31537	6.67869	0.0668834	0.0495743	0.0451405	0.0247995	0.615328	3.65927	0.741205
36	4	1	0	6.06412	6.15643	7.61708	0.0450266	0.0479062	0.0211343	0.023924	1.0495	3.51366	1.06395	1.132	0.0928259	7.2729	7.3608	8.55412	0.0595514	0.0676577	0.0262425	0.0338732	1.90497	3.67203	1.13612	1.29078	0.148718	7.24512	7.31894	8.48514	0.0696389	0.0723307	0.0335351	0.0361777	1.96515	3.14053	1.03865	1.0788	0.195101	6.75203	6.78945	8.03539	0.0848548	0.0605039	0.0595553	0.0302785	1.02376	2.63827	0.713028
36	1	1	0	6.38043	6.38879	7.18721	0.0360485	0.0118019	0.0550792	0.00590362	0.225264	1.4094	0.32739	0.107184	0.0298095	6.72568	6.77269	7.75287	0.0588178	0.0469302	0.0368521	0.0234612	1.09022	2.72858	0.797891	0.63663	0.156762	6.80295	6.81669	7.74651	0.0671027	0.0290716	0.0772868	0.0145065	0.683204	1.75686	0.43324	0.187697	0.189817	6.94946	7.03366	8.80132	0.0451126	0.0490325	0.0207913	0.0245615	1.77366	4.0525	1.08689
36	2	1	0	3.84127	3.88992	5.46981	0.100141	0.0614691	0.0817983	0.03082	0.90645	2.67949	0.613824	0.37678	0.307426	6.79966	6.85314	8.34237	0.0711634	0.0608659	0.0415835	0.0304198	1.05552	3.56127	0.855299	0.731536	0.215085	5.40131	5.4546	6.98764	0.0656246	0.0499582	0.0431552	0.02501	1.16536	3.16486	0.761273	0.579537	0.200021	4.06351	4.11804	5.3684	0.0749612	0.050118	0.0561518	0.0251002	0.764043	2.71032	0.668585
36	3	1	0	4.71035	4.80071	7.0242	0.0593042	0.0550451	0.0319267	0.0275057	1.00143	3.54388	0.928183	0.861525	0.155765	4.44734	4.49612	5.61623	0.0876481	0.0579614	0.0663682	0.0290237	1.06061	2.42159	0.661297	0.437314	0.26183	3.96363	3.97377	4.48429	0.068111	0.0193506	0.119827	0.00967179	0.493239	0.953597	0.284103	0.0807147	0.183085	4.72262	4.79277	5.63477	0.0485139	0.0396836	0.0296243	0.0198215	1.4345	2.55063	0.817984
36	4	1	0	6.62358	6.68829	8.49633	0.085095	0.0791064	0.0457159	0.0395078	1.47088	3.39423	0.929625	0.864203	0.261216	7.53452	7.54997	8.30258	0.0841704	0.0406903	0.0873659	0.0204176	0.831189	1.85209	0.483428	0.233702	0.229565	6.49158	6.57081	8.22839	0.060225	0.0613673	0.0295103	0.0306405	1.49505	3.60127	1.01897	1.0383	0.146269	7.2121	7.25733	8.70305	0.0547689	0.0443772	0.0338821	0.0222444	0.895898	3.11842	0.810262
36	1	1	0	7.001	7.03711	8.85746	0.0787319	0.0561441	0.0553276	0.0281351	0.709104	2.90755	0.713105	0.508519	0.200278	6.41891	6.42892	6.97395	0.111791	0.0401512	0.156256	0.0201567	0.546196	1.49777	0.359163	0.128998	0.32588	5.79396	5.81224	6.59081	0.0946074	0.0436457	0.102478	0.0218104	0.776609	1.71845	0.461334	0.212829	0.286509	6.30812	6.34191	7.18598	0.073267	0.0479745	0.056123	0.0240628	0.748172	2.51545	0.654791
36	2	1	0	3.64885	3.71926	4.94993	0.0562082	0.0405373	0.0390398	0.0203057	0.932487	2.85937	0.721198	0.520127	0.157725	7.60871	7.65042	8.90453	0.0677804	0.0541418	0.0424083	0.0270588	1.11044	3.06327	0.798782	0.638053	0.192255	5.73598	5.76515	6.76064	0.098756	0.0572683	0.0851606	0.0286379	0.964407	2.19217	0.579897	0.336281	0.307896	4.48136	4.50526	5.80837	0.0502773	0.0233297	0.0542523	0.0116813	0.687062	1.96955	0.46402
36	3	1	0	4.43589	4.50436	5.91748	0.0850966	0.0666428	0.0543268	0.0333194	0.898759	3.23546	0.783144	0.613314	0.266319	4.93512	4.9608	6.10957	0.0677077	0.0341579	0.0671907	0.0171007	0.677694	1.90946	0.50449	0.254511	0.18921	3.6164	3.70276	4.61896	0.0523023	0.0416215	0.0328337	0.0207929	1.05827	2.83565	0.795788	0.633279	0.14435	4.93062	5.01838	6.9463	0.0495276	0.046323	0.0264897	0.0231726	1.35543	3.23787	0.935296
36	4	1	0	6.04514	6.09683	7.18669	0.0814799	0.0646494	0.0514397	0.0323837	0.938778	3.03568	0.79344	0.629547	0.225198	6.87315	6.94791	8.51047	0.0492444	0.0501341	0.0241565	0.0250372	1.94301	3.26727	1.01807	1.03646	0.126375	6.50395	6.55872	8.17769	0.0522469	0.0442617	0.0308335	0.0221287	0.856819	3.16923	0.847163	0.717685	0.126627	6.54174	6.55383	7.09121	0.0699647	0.027874	0.0881677	0.0139942	0.44251	1.54485	0.3984
36	1	1	0	6.43114	6.45131	7.75467	0.0477557	0.0243705	0.0469149	0.0122176	0.499108	1.92644	0.510315	0.260421	0.120052	6.24544	6.30219	8.53819	0.0569062	0.0480722	0.0336694	0.0240272	1.12191	3.43403	0.844761	0.713621	0.157046	6.46469	6.4939	7.62843	0.0770171	0.0474338	0.062561	0.0237304	0.909453	2.91873	0.615887	0.379317	0.220168	6.99109	7.02715	8.29975	0.0571508	0.0406725	0.0402075	0.020364	0.801453	3.49666	0.71167
36	2	1	0	3.99069	4.02582	5.06102	0.0751566	0.0399295	0.0706964	0.0199549	0.823245	2.12284	0.531284	0.282262	0.204616	7.26793	7.3058	8.16824	0.0585896	0.043575	0.0394312	0.0218109	0.736327	3.80752	0.743732	0.553138	0.12495	5.05506	5.09504	5.78012	0.0848817	0.0541302	0.0667825	0.027159	1.09442	2.26482	0.637714	0.406679	0.258779	4.46378	4.50533	5.60397	0.0488303	0.0298419	0.0399357	0.0149153	0.539065	2.8699	0.611133
36	3	1	0	4.62315	4.68743	6.08434	0.0646208	0.0500456	0.0417295	0.0250283	1.12393	3.13987	0.774451	0.599775	0.187659	4.40235	4.4545	5.68093	0.059405	0.040414	0.0436411	0.0201982	1.21431	2.55444	0.680313	0.462826	0.183745	4.25567	4.31558	5.25112	0.0571404	0.0409884	0.039902	0.0205319	0.935036	2.7105	0.717327	0.514559	0.164564	4.96482	5.02109	6.60897	0.0682689	0.0512295	0.0454629	0.0256007	0.983516	3.11597	0.750408
36	4	1	0	7.0942	7.12359	8.40289	0.0655881	0.0424531	0.0508233	0.0212928	0.999615	2.53596	0.647268	0.418956	0.163137	7.77127	7.8098	8.52885	0.050899	0.039488	0.0328703	0.0197841	0.821639	3.44158	0.775812	0.601884	0.115809	7.27439	7.34145	8.38285	0.0514823	0.0510381	0.0259633	0.0255172	1.52453	4.06729	0.991373	0.98282	0.10328	6.65222	6.72047	7.51316	0.0428733	0.0410122	0.0224063	0.0205033	1.13039	3.34396	0.956591
36	1	1	0	7.09413	7.11824	7.94135	0.0517538	0.0303321	0.0442048	0.0151841	0.829619	2.27685	0.586083	0.343494	0.112868	6.61068	6.63738	7.8514	0.0513668	0.0305878	0.0431314	0.0152942	1.0116	2.15083	0.595479	0.354595	0.152768	5.79358	5.83657	6.87256	0.0580894	0.0411282	0.040946	0.0205257	0.952252	2.66221	0.708016	0.501286	0.152274	6.84962	6.89112	7.97391	0.0707628	0.053509	0.0467395	0.0267257	1.34885	2.43175	0.756175
36	2	1	0	3.82581	3.88608	5.22478	0.0621015	0.0423813	0.0455687	0.0212232	1.19478	2.4809	0.682453	0.465741	0.171708	7.05382	7.08504	8.25011	0.0714906	0.047542	0.0539561	0.0238615	0.920587	2.85228	0.665011	0.44224	0.219257	5.20004	5.23339	6.27163	0.093365	0.0551279	0.0790668	0.0275657	0.899869	2.41471	0.590456	0.348638	0.300717	4.2724	4.31174	5.12624	0.0662489	0.0385332	0.0570136	0.0192881	0.785737	2.55307	0.581642
36	3	1	0	4.7689	4.82668	6.3726	0.0665773	0.049629	0.0447505	0.0248666	1.06228	3.09359	0.745434	0.555673	0.173168	4.38132	4.42154	5.5489	0.059197	0.0352617	0.0496248	0.0176078	0.810296	2.4812	0.595666	0.354818	0.173299	3.83335	3.91355	5.1615	0.0631315	0.0498197	0.0399921	0.0249049	1.48921	2.58518	0.789142	0.622745	0.166867	4.461	4.59192	6.26934	0.0419051	0.045672	0.01924	0.0228545	1.91074	3.83429	1.08989
36	4	1	0	5.85733	5.89754	7.28935	0.084071	0.0578731	0.061293	0.0290451	1.04253	2.64139	0.688384	0.473872	0.243233	7.27275	7.38306	8.79249	0.0353735	0.0450364	0.0138824	0.0225027	1.94904	3.95414	1.27317	1.62095	0.0797284	6.58072	6.71689	8.77162	0.0439028	0.0591547	0.0162786	0.0295538	1.25159	4.98483	1.3474	1.81549	0.0908453	6.39539	6.45136	7.47992	0.0393346	0.0333966	0.0231998	0.016724	1.33556	2.85922	0.849038
37	1	1	0	6.83285	6.87967	8.3428	0.0774787	0.0621577	0.0483459	0.0311161	1.24673	2.91362	0.802256	0.643614	0.209086	7.01618	7.03957	8.02825	0.0522568	0.0300037	0.0455017	0.0150001	0.433531	2.37749	0.57416	0.32966	0.153376	6.57589	6.59444	7.54513	0.0832862	0.0412221	0.0842897	0.0206485	0.796388	1.85959	0.494946	0.244971	0.245474	6.76602	6.79059	7.95175	0.0811742	0.0469151	0.0703904	0.0235127	1.03478	2.14856	0.577956
37	2	1	0	5.23044	5.29416	7.30006	0.0617282	0.0506416	0.0376125	0.0253151	0.673337	2.85811	0.820396	0.673049	0.149197	6.25649	6.2857	7.91758	0.0677985	0.0411125	0.0557855	0.020513	0.75597	2.51251	0.606393	0.367712	0.169931	4.29334	4.35807	5.68228	0.0843493	0.0632369	0.0562543	0.031618	1.16347	2.65811	0.749702	0.562054	0.251018	4.77693	4.7991	5.66252	0.0956959	0.0441813	0.103645	0.0220921	0.748457	1.70902	0.461684
37	3	1	0	5.3538	5.41223	6.68333	0.0940425	0.0746739	0.0591726	0.0373086	1.45551	2.67629	0.794044	0.630506	0.271325	5.04863	5.06423	6.01533	0.0753866	0.0299722	0.0947961	0.0149845	0.414872	1.94641	0.397581	0.15807	0.217625	7.1083	7.15887	8.7117	0.0752469	0.0639861	0.0442537	0.0319996	1.34623	3.25756	0.850349	0.723093	0.201412	6.71426	6.75593	8.242	0.0732936	0.0549784	0.0488764	0.0275012	0.852686	3.34633	0.750112
37	4	1	0	7.98003	8.01603	9.23632	0.0332508	0.0252659	0.021915	0.0126534	1.52595	2.22698	0.759858	0.577384	0.0704934	7.45715	7.48502	8.65893	0.0592625	0.0382933	0.0459104	0.0191689	0.697242	2.53389	0.646165	0.417529	0.154581	6.31711	6.34339	7.6215	0.084287	0.0486748	0.0729011	0.024312	0.919631	2.31857	0.577489	0.333494	0.262169	6.84743	6.86193	7.73072	0.0865101	0.0386206	0.096874	0.0193069	0.689896	2.14997	0.446429
37	1	1	0	6.72603	6.76129	8.28493	0.0424438	0.0293096	0.0307541	0.0146654	1.13023	2.31583	0.690549	0.476858	0.112493	6.92492	6.96629	8.10449	0.0645468	0.048995	0.0425359	0.0245081	1.24309	2.65647	0.759061	0.576174	0.176523	6.01031	6.07851	8.0111	0.0662229	0.0602124	0.0364064	0.0300977	0.989061	3.81423	0.909238	0.826714	0.194119	5.99233	6.00936	6.53986	0.0630703	0.028554	0.0695598	0.0142575	0.747659	1.58111	0.452733
37	2	1	0	4.89744	4.93598	6.02954	0.0833211	0.0513415	0.0677847	0.025737	0.837756	2.81521	0.616188	0.379688	0.268582	6.75871	6.80689	8.34426	0.0776453	0.0628322	0.0479736	0.031415	1.37823	2.90585	0.809221	0.654838	0.240867	4.74214	4.78802	5.79515	0.0648266	0.0429061	0.0489964	0.0214633	1.17464	2.41059	0.66186	0.438059	0.193662	5.05801	5.13571	6.98123	0.058373	0.051995	0.0327756	0.0260046	1.46914	3.66642	0.890737
37	3	1	0	6.25062	6.30193	7.59265	0.0885212	0.0711203	0.0551535	0.0356013	1.09941	3.62755	0.803427	0.645496	0.268692	5.62874	5.65804	6.83775	0.0589311	0.0339228	0.0513253	0.0170069	0.905414	2.11489	0.575635	0.331355	0.168771	6.96699	7.01512	8.84472	0.0867002	0.0712004	0.0529564	0.0357144	1.10726	3.44144	0.821225	0.674411	0.291829	7.20057	7.23253	8.25866	0.0719948	0.0489577	0.0530673	0.0245396	1.13024	2.4237	0.680017
37	4	1	0	8.52689	8.53207	9.15935	0.0765231	0.0227955	0.128629	0.0114144	0.51338	1.01066	0.297891	0.0887388	0.234216	7.36743	7.38458	8.5427	0.0650328	0.0327578	0.0645112	0.0163682	0.677805	1.97806	0.503713	0.253727	0.185636	6.51462	6.51624	6.87343	0.0830046	0.0120599	0.287323	0.00606532	0.238098	0.552707	0.145292	0.0211097	0.247784	6.67662	6.68072	6.96251	0.0628132	0.0147235	0.135062	0.00742079	0.223765	0.923436	0.234401
37	1	1	0	6.6964	6.7249	7.55478	0.0510351	0.0316005	0.04121	0.0157998	1.06245	2.11649	0.619191	0.383398	0.129959	7.1656	7.18646	8.01066	0.054338	0.0297695	0.0495409	0.0148696	0.942039	1.8302	0.547857	0.300147	0.140978	6.6471	6.6668	7.61015	0.0722375	0.0370332	0.0705115	0.0185318	0.551763	2.0913	0.512659	0.262819	0.228976	6.72984	6.75976	8.18205	0.0548394	0.0348815	0.0432162	0.0174844	0.638623	2.66345	0.636067
37	2	1	0	4.81741	4.85249	6.12394	0.0929203	0.0541721	0.0797522	0.0271065	0.969029	2.35107	0.582996	0.339884	0.296019	6.3949	6.43272	7.77984	0.0850289	0.0592807	0.0610177	0.0296586	1.24175	2.74723	0.697184	0.486065	0.265172	4.26059	4.33464	5.75837	0.0750084	0.0598934	0.0469336	0.0299241	1.27241	2.76574	0.798489	0.637585	0.21622	4.53472	4.63316	6.59664	0.0724459	0.0688838	0.038071	0.0344192	1.488	3.61694	0.950831
37	3	1	0	6.60772	6.63027	7.43932	0.0541901	0.0296508	0.0496331	0.0148595	1.05596	1.60522	0.547162	0.299386	0.134199	5.48192	5.51777	6.6145	0.0578598	0.0363867	0.0459639	0.0181781	0.592722	2.4647	0.628878	0.395487	0.163581	7.42438	7.452	8.44695	0.0711533	0.0456751	0.0554391	0.0228446	0.733171	2.46145	0.641924	0.412067	0.203204	7.18432	7.25033	8.98538	0.0637833	0.0623482	0.0326652	0.0312119	1.45863	3.62178	0.977501
37	4	1	0	8.15157	8.1967	9.54834	0.0601551	0.0517569	0.0349529	0.0258748	1.30189	2.88831	0.860392	0.740275	0.149574	7.80113	7.80862	8.41985	0.0892	0.0305522	0.13024	0.0152791	0.505871	1.54902	0.342513	0.117315	0.234492	7.01092	7.01677	7.70286	0.0649859	0.0186514	0.113041	0.00931147	0.285674	1.12585	0.287006	0.0823727	0.168782	7.08245	7.0914	8.07772	0.0813998	0.0290292	0.114156	0.0145185	0.495497	1.61666	0.356625
37	1	1	0	7.10595	7.13068	8.20124	0.0782881	0.0465152	0.0661094	0.0233378	0.945891	2.24952	0.594153	0.353018	0.22074	7.45852	7.49027	9.11944	0.0421894	0.0291086	0.0306244	0.0145782	0.545233	2.69392	0.689951	0.476032	0.0818874	6.54331	6.56634	7.75367	0.088599	0.0487556	0.0808088	0.0244708	0.660188	2.41958	0.550295	0.302824	0.277562	6.34209	6.37852	7.9881	0.0796142	0.0542666	0.0584128	0.0271389	0.897819	2.72481	0.68162
37	2	1	0	5.4999	5.53061	6.83586	0.0641429	0.0373681	0.0551426	0.0187151	0.808695	2.36669	0.582575	0.339394	0.192311	7.08584	7.10884	8.62275	0.0649056	0.0371245	0.0568162	0.0185879	0.836099	3.10751	0.571977	0.327158	0.181589	4.41675	4.46293	5.39422	0.0760663	0.0487525	0.0595241	0.0244513	1.03706	2.27904	0.640921	0.41078	0.247193	4.94925	4.9829	6.41355	0.053532	0.0309784	0.0463369	0.0155174	0.59193	2.79995	0.57869
37	3	1	0	6.74876	6.78826	8.24301	0.0828691	0.0606515	0.0566428	0.0303419	1.27695	2.65993	0.731896	0.535671	0.250233	5.63419	5.66681	7.14151	0.0597839	0.0363267	0.0491532	0.0181483	0.858038	2.51522	0.607634	0.369219	0.166302	7.19944	7.23602	8.84795	0.0709617	0.0516124	0.0488021	0.0258166	0.969629	2.97542	0.727328	0.529007	0.19944	7.48721	7.50037	8.61313	0.0614769	0.0273175	0.0691554	0.0136547	0.678519	1.83052	0.444353
37	4	1	0	8.96496	8.98446	9.6422	0.0496667	0.0294329	0.0419125	0.014719	0.549594	2.49216	0.592608	0.351185	0.100126	7.02417	7.08265	8.29939	0.0458841	0.0417438	0.0252257	0.0208786	0.849539	3.74118	0.909766	0.827674	0.0793393	6.69311	6.69682	7.13399	0.0643194	0.0143488	0.144331	0.00718299	0.210349	0.850874	0.223086	0.0497674	0.154773	6.87424	6.88805	8.06936	0.0557713	0.0243525	0.0637521	0.0121552	0.65187	1.74964	0.43665
37	1	1	0	7.0823	7.09303	7.86	0.0961594	0.0375553	0.123313	0.018809	0.641979	1.79282	0.390552	0.152531	0.306373	6.76947	6.77702	7.61828	0.0892527	0.0285677	0.13962	0.014304	0.379229	1.33564	0.320077	0.102449	0.255855	5.88825	5.91396	6.62235	0.0712178	0.0392784	0.0645092	0.0196225	0.644583	2.22269	0.551526	0.304181	0.219457	6.56618	6.57309	6.98688	0.0672641	0.0202931	0.111524	0.0101508	0.51112	1.06508	0.301692
37	2	1	0	5.58634	5.64876	7.44921	0.0739596	0.0619894	0.0441021	0.0309816	1.14521	3.62452	0.838151	0.702497	0.225946	7.26741	7.29403	8.42215	0.0766892	0.0477904	0.0615606	0.0239065	1.07161	2.42422	0.62317	0.388341	0.232115	4.3533	4.42859	5.74629	0.0504401	0.04105	0.0310224	0.020547	0.951747	3.11057	0.813836	0.662329	0.129506	4.75406	4.79982	5.91025	0.0745286	0.049322	0.0563433	0.0246762	1.10472	2.3431	0.661786
37	3	1	0	6.14423	6.16251	7.24955	0.0671984	0.0319078	0.0708649	0.0159774	0.534443	1.95595	0.47483	0.225463	0.201741	5.46672	5.54212	7.30649	0.0610865	0.0557172	0.0335071	0.0278757	1.11542	3.61171	0.912104	0.831934	0.172911	7.27883	7.29519	8.06226	0.0395756	0.0193453	0.0406139	0.00970446	0.928528	1.6513	0.488819	0.238944	0.0951778	6.81877	6.83889	7.73778	0.0755703	0.0396561	0.0720883	0.019851	0.668765	2.36765	0.524758
37	4	1	0	8.28943	8.31753	9.04768	0.0598515	0.0409527	0.0438294	0.0205201	0.567653	2.61267	0.684238	0.468181	0.152726	7.84288	7.85478	8.72814	0.0857203	0.037104	0.0990319	0.0185545	0.661958	1.53703	0.43285	0.187359	0.256844	6.66739	6.67071	7.17908	0.0850214	0.0179415	0.202196	0.00900401	0.257588	0.916901	0.211024	0.044531	0.250665	6.93719	6.95365	8.20759	0.0395148	0.0189261	0.0414129	0.00950034	0.393779	1.7508	0.478963
38	1	1	0	7.12365	7.14076	8.55507	0.0712611	0.0352519	0.072323	0.0176985	0.620698	2.15312	0.494686	0.244714	0.201884	6.94725	6.96584	7.7633	0.0793142	0.0403895	0.0780725	0.0202457	0.658182	1.85471	0.509233	0.259319	0.225874	6.61704	6.62683	7.41036	0.0735934	0.0265295	0.102013	0.0132566	0.577944	1.36222	0.360487	0.129951	0.210438	7.02763	7.0468	7.93782	0.0697832	0.036294	0.0671515	0.0181645	0.888688	1.8432	0.520097
38	2	1	0	5.3577	5.38531	6.91459	0.082146	0.0447844	0.0755015	0.0224407	0.763693	2.47022	0.545181	0.297222	0.248295	7.34559	7.37651	8.95046	0.073261	0.049482	0.0543451	0.0247918	1.07923	2.74099	0.67542	0.456192	0.234119	5.41569	5.45823	6.93144	0.106263	0.0723559	0.078068	0.0361959	0.714755	2.81984	0.680916	0.463646	0.330178	5.15948	5.17095	5.77999	0.085475	0.0294519	0.124337	0.0147621	0.546923	1.52375	0.344567
38	3	1	0	6.31674	6.35825	7.83318	0.0662673	0.0481286	0.0455631	0.0240337	1.1403	3.05047	0.72628	0.527483	0.198658	5.76762	5.78292	6.62669	0.0955065	0.0401921	0.113704	0.0201368	0.539684	1.76398	0.420831	0.177099	0.295141	5.43007	5.47123	7.3438	0.079178	0.0531004	0.0590833	0.0265736	0.614521	3.06005	0.670646	0.449766	0.241225	6.72339	6.74227	7.62827	0.0907395	0.0458055	0.0898643	0.0228997	0.821843	2.0595	0.504802
38	4	1	0	6.51705	6.56334	7.95182	0.0604489	0.0470919	0.0388307	0.0235662	1.21133	2.54869	0.779035	0.606896	0.164991	7.82446	7.88039	9.53559	0.056372	0.0528907	0.0300354	0.0264403	1.44322	3.61902	0.938245	0.880303	0.172845	7.31353	7.38118	8.59056	0.0600012	0.0598894	0.0300385	0.0299267	1.33295	3.59675	0.998137	0.996277	0.165416	7.46767	7.51793	8.77865	0.0508066	0.0441399	0.0292378	0.0220682	1.40169	2.87914	0.868783
38	1	1	0	7.07585	7.1171	8.83502	0.0854469	0.0654501	0.0557378	0.0327023	1.04481	3.15257	0.765974	0.586716	0.264675	6.82769	6.85957	8.05899	0.0869068	0.0574683	0.0656366	0.0287009	0.883248	2.6162	0.661264	0.43727	0.274294	5.86803	5.89756	6.86247	0.0809291	0.0477554	0.068616	0.0238924	1.10479	1.97074	0.590089	0.348205	0.246532	6.60807	6.6715	8.69061	0.0559181	0.0513786	0.0304024	0.0256666	1.06245	3.81783	0.918819
38	2	1	0	4.92751	4.9488	5.91706	0.0834784	0.0383254	0.0908633	0.0191519	0.65894	1.89638	0.459105	0.210778	0.25984	6.96391	6.98112	7.76279	0.0960952	0.0471341	0.0980711	0.0235943	0.646118	2.09736	0.490493	0.240584	0.298254	5.34797	5.40159	7.00246	0.0696101	0.0529118	0.045815	0.0264709	1.03395	3.12302	0.760118	0.577779	0.214097	4.92566	5.02334	7.24186	0.062837	0.0620223	0.0317885	0.0309696	1.12281	4.07992	0.987035
38	3	1	0	6.14198	6.16172	7.04663	0.0982759	0.0484841	0.0994934	0.0242158	0.752586	1.84933	0.493347	0.243391	0.306673	5.53996	5.56798	6.58522	0.101196	0.0565181	0.090563	0.0282486	0.934482	2.26535	0.5585	0.311922	0.276651	5.45202	5.52085	7.17748	0.0731892	0.0636755	0.0421067	0.0318714	1.37064	3.29571	0.870012	0.756921	0.217418	6.12286	6.1641	7.77732	0.103932	0.0740634	0.0729563	0.0370483	1.08419	3.08772	0.712611
38	4	1	0	5.74618	5.77723	6.80786	0.0925954	0.0554652	0.0773067	0.0277383	0.935139	2.46402	0.599006	0.358808	0.283946	7.41446	7.46015	8.6378	0.0613386	0.0506317	0.0371609	0.02532	1.48747	2.82582	0.825446	0.681361	0.157198	7.23576	7.26351	8.1819	0.0596121	0.0378544	0.0471026	0.0189937	0.78505	2.47312	0.635012	0.40324	0.161573	7.70016	7.71973	8.83772	0.0948592	0.0521667	0.0865076	0.0261627	0.778056	2.3312	0.549938
38	1	1	0	7.17279	7.20755	8.55029	0.0749014	0.0530088	0.0528648	0.0264778	1.12297	2.64957	0.707714	0.50086	0.257015	6.66155	6.71303	8.1783	0.0652757	0.0542143	0.0392484	0.0270737	1.21578	3.27738	0.830543	0.689802	0.191788	6.25441	6.28245	7.52112	0.0823795	0.0488933	0.0695228	0.0244899	0.868125	2.4166	0.593512	0.352257	0.263946	6.57716	6.60154	7.57792	0.0469153	0.0266167	0.0414044	0.0133268	0.9967	1.97428	0.567335
38	2	1	0	4.91704	4.99959	6.64947	0.0965145	0.0874622	0.053309	0.043778	1.65081	2.82154	0.906208	0.821213	0.263469	7.35708	7.38659	8.53981	0.0956137	0.0631638	0.0725756	0.0316728	1.17316	2.12166	0.660615	0.436412	0.286736	5.57528	5.61241	6.66183	0.0947708	0.0611743	0.073546	0.0306442	1.05081	2.15887	0.645497	0.416667	0.276567	4.89239	4.97372	6.43353	0.0555822	0.0498669	0.031009	0.0249598	0.978912	3.3609	0.897174
38	3	1	0	6.35396	6.42191	8.18171	0.0786484	0.0733529	0.0421159	0.0366355	1.36116	3.68067	0.932669	0.869872	0.240147	5.86066	5.88501	6.71361	0.071758	0.0384219	0.0670334	0.0192181	0.911114	1.79427	0.535438	0.286694	0.220128	5.73653	5.80465	7.74359	0.0742592	0.0659176	0.0417896	0.0329284	1.21208	3.79308	0.887669	0.787957	0.243915	6.28965	6.30479	7.35394	0.0977266	0.0427143	0.111775	0.0213533	0.556467	1.8346	0.43708
38	4	1	0	6.00529	6.06248	7.76138	0.0901164	0.0749706	0.0540686	0.0374213	1.34063	3.58411	0.831931	0.692109	0.249511	7.59126	7.61645	8.83971	0.068726	0.0425963	0.0553709	0.0212708	0.875807	2.2435	0.619799	0.384151	0.189584	6.92702	6.98841	8.41475	0.0651554	0.0603058	0.0351507	0.0301128	1.03097	3.81572	0.925569	0.856677	0.158617	8.17133	8.19527	9.05063	0.0669217	0.0419487	0.0534503	0.0210017	0.752871	2.36614	0.626833
38	1	1	0	7.19686	7.22416	8.17191	0.0801642	0.0503747	0.0638519	0.0252138	1.08413	2.25377	0.628394	0.394879	0.214738	7.03167	7.05342	8.1373	0.0975508	0.0540672	0.0880072	0.0270349	0.816522	2.14912	0.554247	0.30719	0.291584	6.2696	6.30078	7.52113	0.109165	0.0684447	0.0871207	0.0342478	1.05648	2.33875	0.626983	0.393107	0.311522	6.89914	6.95221	8.72997	0.0777784	0.0667792	0.0453339	0.0334185	1.26792	3.5324	0.858582
38	2	1	0	4.99822	5.02371	5.9941	0.0628547	0.0318096	0.0622985	0.0159558	0.881888	1.90548	0.506082	0.256119	0.174519	7.3529	7.37111	8.21411	0.0971414	0.0503603	0.0938732	0.0252296	0.787319	2.08081	0.518423	0.268762	0.298139	5.627	5.65016	6.59489	0.0758413	0.038811	0.0741466	0.0194174	0.94958	1.8508	0.51174	0.261878	0.247417	5.31693	5.45048	7.50891	0.0612693	0.0735571	0.0254835	0.0367302	1.35392	4.59931	1.20055
38	3	1	0	6.27288	6.31902	7.89527	0.0939251	0.0716726	0.0616458	0.035896	1.13686	3.21725	0.763082	0.582294	0.314839	5.96505	6.02397	7.84902	0.0774737	0.0651876	0.0460017	0.0325683	1.07189	3.56703	0.841415	0.707979	0.256506	5.17995	5.19363	5.95943	0.117849	0.0444462	0.156606	0.0222754	0.558324	1.398	0.377145	0.142239	0.362531	6.28885	6.32157	7.88917	0.101039	0.0649699	0.0785686	0.032486	0.959508	2.80491	0.643018
38	4	1	0	6.34928	6.45207	8.43706	0.0632842	0.0727013	0.0276351	0.0364716	1.64218	4.11047	1.14881	1.31976	0.153038	8.52356	8.54388	9.63707	0.105867	0.062435	0.0900492	0.0313194	0.894932	2.19974	0.589749	0.347804	0.330652	7.70678	7.72283	8.53535	0.071804	0.035784	0.0724182	0.0179858	0.818641	1.66575	0.498357	0.24836	0.205412	7.46848	7.50424	8.66431	0.091235	0.0668619	0.0622104	0.0334116	0.877697	2.91389	0.732854
38	1	1	0	6.84767	6.88154	8.37019	0.0717322	0.0489627	0.052587	0.0245008	1.05688	2.92132	0.682576	0.46591	0.22622	6.73254	6.75922	8.07062	0.0797166	0.0478726	0.0665176	0.0239891	0.769192	2.51897	0.600535	0.360643	0.25722	6.43478	6.4533	7.51967	0.0760251	0.0371704	0.0779254	0.0186277	0.834846	1.97716	0.488922	0.239045	0.257281	6.55555	6.57511	7.37862	0.0812694	0.0412284	0.080134	0.0206232	0.666271	2.14324	0.507305
38	2	1	0	5.40553	5.45809	6.62391	0.106106	0.0802787	0.0701876	0.0401771	1.31106	2.60578	0.756587	0.572424	0.318976	7.54009	7.57102	8.46883	0.0625139	0.0427964	0.0457164	0.0214256	1.0604	2.37366	0.68459	0.468663	0.174468	5.66748	5.70271	6.88709	0.0654828	0.0415021	0.0516682	0.0207544	1.25342	2.26926	0.633787	0.401686	0.209907	4.99997	5.07637	6.7342	0.0776771	0.0682424	0.0442098	0.0341224	1.2644	3.17779	0.878539
38	3	1	0	6.40485	6.42922	7.60543	0.0776339	0.0434618	0.0693429	0.0217327	0.709308	2.19833	0.55983	0.313409	0.24876	5.95474	5.9913	7.73352	0.0669034	0.0442623	0.0506772	0.0221812	0.585608	3.21213	0.661586	0.437696	0.172706	5.40582	5.4208	6.01101	0.0958175	0.038639	0.118737	0.0193085	0.471808	1.7873	0.403256	0.162616	0.296486	6.47075	6.49542	7.80594	0.0787158	0.044565	0.0696923	0.0223382	0.765511	2.37579	0.566151
38	4	1	0	6.51923	6.59249	8.55682	0.0638507	0.0626419	0.0325414	0.031321	1.07516	4.00903	0.981069	0.962496	0.184088	8.26427	8.27918	9.10974	0.0608162	0.0302398	0.0614494	0.0151928	0.803764	1.98241	0.497233	0.247241	0.174696	8.16768	8.1959	9.2325	0.0839455	0.0571034	0.0617794	0.0285872	1.03347	2.5626	0.680243	0.462731	0.259421	8.07078	8.08364	9.11341	0.0591632	0.0269975	0.0650158	0.0135382	0.509307	1.90526	0.456322
39	1	1	0	7.00923	7.03852	8.40319	0.0810305	0.0520623	0.0629417	0.0259829	0.77829	2.59195	0.642503	0.41281	0.240771	6.60899	6.63756	7.96544	0.0724255	0.0446277	0.058719	0.0222949	0.723011	2.62656	0.616188	0.379688	0.186019	6.41551	6.45689	7.67733	0.0599533	0.0438271	0.0410165	0.0219189	1.11338	2.56767	0.731021	0.534392	0.149089	6.83172	6.87117	8.09471	0.067307	0.0495652	0.0456572	0.0247596	1.29666	2.67138	0.736405
39	2	1	0	4.85676	4.87442	5.51255	0.0571322	0.0237138	0.0687785	0.0118493	0.770188	1.29842	0.415068	0.172282	0.133071	6.62494	6.63786	7.21981	0.0596273	0.0247172	0.0720791	0.0123857	0.568143	1.7613	0.414529	0.171834	0.148915	5.73631	5.80507	7.53919	0.0846374	0.0754898	0.0474113	0.0377167	1.16772	3.42784	0.89192	0.795521	0.259556	5.17897	5.20568	6.04017	0.054716	0.0288527	0.0518054	0.0144053	0.919874	1.72328	0.527319
39	3	1	0	5.39679	5.43886	6.36792	0.0634115	0.0428522	0.0468729	0.0214058	1.03452	2.52169	0.67578	0.456679	0.184325	5.5359	5.59657	7.42321	0.0599468	0.0493145	0.0364063	0.0246373	1.05565	3.34263	0.822638	0.676733	0.158311	5.23335	5.32074	7.71764	0.0663289	0.0637586	0.0345997	0.0319701	1.08755	5.05813	0.961249	0.924	0.185019	6.40433	6.43801	7.57355	0.0614583	0.0404594	0.0467055	0.0202416	0.851151	2.93736	0.658323
39	4	1	0	6.43688	6.53494	7.99679	0.053954	0.0609212	0.023936	0.0305169	1.82558	3.77428	1.12913	1.27494	0.134207	6.22038	6.27395	7.37853	0.0559653	0.045836	0.0341504	0.0229072	1.02477	3.22681	0.819008	0.670774	0.156175	6.94239	6.98865	8.72229	0.0687355	0.0552431	0.0427545	0.0276169	0.953868	3.52477	0.803705	0.645941	0.204033	6.62773	6.67662	7.8918	0.0493666	0.0398626	0.0305319	0.0199076	1.53367	2.66928	0.807481
39	1	1	0	7.17016	7.19564	8.2349	0.0759343	0.046011	0.0627388	0.0230348	1.06344	2.04065	0.605932	0.367153	0.216677	7.20152	7.22043	7.82202	0.048238	0.025231	0.0461914	0.0126372	0.915318	1.63901	0.523052	0.273583	0.115307	7.10111	7.16015	8.68628	0.051683	0.0474916	0.0281128	0.0237379	1.41659	3.35025	0.918902	0.84438	0.134322	6.58702	6.60018	7.32142	0.0787912	0.0328721	0.0944506	0.0164401	0.66305	1.68961	0.417206
39	2	1	0	4.91972	4.97247	6.61997	0.0664779	0.0480654	0.0459426	0.0240174	1.17771	2.93625	0.723027	0.522769	0.184885	6.52762	6.55921	7.55133	0.0699918	0.0450439	0.0544778	0.022563	0.902427	2.42489	0.64356	0.414169	0.204226	5.83829	5.88315	7.24406	0.0642878	0.0466657	0.0442652	0.0233239	0.908054	2.87448	0.725888	0.526914	0.192838	5.13632	5.16202	6.13424	0.0921128	0.0474294	0.0894962	0.023728	0.928415	2.00087	0.514906
39	3	1	0	5.80052	5.85711	6.94559	0.0610507	0.0496385	0.0375777	0.0248419	1.42609	2.65106	0.81307	0.661082	0.156823	5.73606	5.8149	8.23778	0.0626022	0.0597999	0.0327503	0.0298839	1.23433	3.94679	0.955237	0.912477	0.187758	5.3089	5.39888	7.11591	0.0686751	0.0674796	0.0348952	0.0336909	1.67827	3.65198	0.982593	0.965489	0.184024	6.40305	6.45511	8.36898	0.0516105	0.0422691	0.0314866	0.0211201	0.936745	3.01798	0.819003
39	4	1	0	5.56297	5.64775	7.29073	0.0829084	0.0809513	0.0425666	0.0405807	1.36603	3.68255	0.976394	0.953346	0.240521	6.61149	6.69524	8.11096	0.0433982	0.04588	0.0205648	0.0229842	1.34482	3.75365	1.05719	1.11765	0.0988089	6.30148	6.32106	6.91097	0.0417731	0.0207951	0.0419317	0.0103913	0.469328	1.71398	0.49781	0.247814	0.0873585	6.02184	6.08715	7.81038	0.0592665	0.0527832	0.0333307	0.0264373	1.47425	3.17883	0.890608
39	1	1	0	7.18278	7.2011	8.05611	0.0897692	0.0461327	0.0874541	0.0230963	0.825592	2.36276	0.513903	0.264097	0.245494	6.94416	6.96031	7.99726	0.0789904	0.037477	0.0833497	0.0187623	0.636308	2.08553	0.47445	0.225103	0.232084	6.48895	6.50754	7.15819	0.0762969	0.0375453	0.0775998	0.0187914	0.849936	1.84452	0.492095	0.242158	0.228589	6.89835	6.91863	7.99604	0.0761223	0.0403492	0.0719411	0.0202127	0.661477	2.11436	0.530058
39	2	1	0	4.79555	4.89218	7.36543	0.0599726	0.0580993	0.030929	0.0290269	1.07114	3.63833	0.968763	0.938502	0.161514	6.52383	6.55979	7.56568	0.0705739	0.0484721	0.0514141	0.0242537	1.14984	2.37698	0.686829	0.471734	0.187724	5.55854	5.62518	7.49806	0.0774538	0.0669542	0.0447748	0.0334583	1.28814	3.34601	0.86444	0.747257	0.219845	3.96305	4.00176	4.7483	0.0600766	0.033402	0.053995	0.0166912	1.06412	1.734	0.55599
39	3	1	0	5.95096	6.00425	7.51432	0.0580655	0.0463827	0.0364031	0.0232281	1.12096	2.89063	0.7988	0.638081	0.165799	5.38755	5.43042	6.96314	0.0527604	0.0359577	0.0387007	0.0179757	0.566436	3.38507	0.681528	0.46448	0.142311	5.52519	5.64119	7.75125	0.0513862	0.05853	0.0225651	0.0292753	1.50473	4.60608	1.13902	1.29737	0.134148	6.20436	6.25921	7.92943	0.0571438	0.0472815	0.0345314	0.0236406	0.79356	3.88827	0.827413
39	4	1	0	5.42972	5.44271	6.14314	0.0534345	0.0201103	0.0715032	0.0101279	0.596017	1.24967	0.376355	0.141643	0.139825	6.06624	6.1142	7.61779	0.0567926	0.0434758	0.0372428	0.021825	0.88163	3.38841	0.765519	0.586019	0.12556	6.05565	6.10547	7.37084	0.0487789	0.0380304	0.031289	0.0190191	0.978474	2.74121	0.779649	0.607852	0.0988671	6.21739	6.22637	6.7601	0.0620174	0.020767	0.0930033	0.0104284	0.600473	1.07625	0.334857
39	1	1	0	7.34421	7.36478	8.45769	0.0736863	0.0405757	0.0668923	0.0202831	0.949582	2.21091	0.550654	0.30322	0.226309	7.34029	7.36234	8.47274	0.0571188	0.0325661	0.0501168	0.0162913	0.646807	2.50137	0.570147	0.325067	0.129848	7.08404	7.1117	8.33906	0.0749686	0.0470369	0.0597004	0.0235015	0.803226	2.34032	0.627421	0.393658	0.225431	6.92626	6.99932	9.07021	0.0497343	0.0502252	0.0246107	0.0250989	1.35709	3.87759	1.00987
39	2	1	0	4.63898	4.68036	5.55113	0.0662562	0.0411969	0.0533349	0.02062	0.853055	2.36988	0.621783	0.386614	0.185341	6.32284	6.40676	8.88572	0.0585535	0.0605957	0.028269	0.0302754	1.14165	3.98873	1.03488	1.07097	0.170174	5.37592	5.47958	8.22155	0.0453626	0.048181	0.0213828	0.0241224	0.997286	4.17806	1.06213	1.12812	0.102706	4.84033	4.88747	6.03026	0.0785879	0.0532837	0.0580408	0.0266816	1.19713	2.34877	0.678015
39	3	1	0	5.29694	5.32741	6.6844	0.051953	0.0295822	0.0456992	0.0148166	0.688824	2.2298	0.569404	0.324221	0.152208	5.31131	5.36049	7.2099	0.0682644	0.0494899	0.0471253	0.0247684	1.11433	3.06176	0.724973	0.525586	0.209676	5.10321	5.1439	6.30615	0.0643723	0.0415975	0.0498535	0.0208176	1.04346	2.33761	0.646201	0.417576	0.184999	6.30674	6.36964	7.88656	0.0562326	0.0502509	0.0314354	0.0251033	1.33074	3.83189	0.893627
39	4	1	0	6.48311	6.5347	8.19434	0.0502522	0.0412334	0.0305963	0.0205996	1.35897	3.00939	0.82053	0.673269	0.132891	6.89486	6.96416	8.50573	0.0546633	0.0536362	0.0278434	0.0268069	1.28616	3.71492	0.981211	0.962775	0.136909	6.58096	6.61045	7.35842	0.0741852	0.0463317	0.0594441	0.0231862	0.912666	2.96696	0.62454	0.390051	0.19958	6.25552	6.27124	7.08798	0.0652323	0.0289784	0.0734961	0.014504	0.890399	1.51756	0.444234
39	1	1	0	7.00817	7.04187	8.62566	0.0541072	0.0372612	0.03928	0.0186284	0.981017	2.71409	0.688656	0.474247	0.148348	7.34955	7.36692	8.20325	0.0582298	0.0294587	0.057595	0.0147408	0.675626	2.34062	0.505903	0.255938	0.157505	6.8938	6.94598	8.51695	0.0554503	0.0471568	0.032574	0.0235588	1.48703	2.93653	0.850434	0.723239	0.148057	6.91553	6.95807	8.56399	0.0544648	0.0418706	0.0354187	0.0209324	1.10649	3.33133	0.768764
39	2	1	0	5.13489	5.26761	7.09668	0.0449889	0.0528975	0.0191287	0.0264451	1.35066	4.74264	1.17579	1.38248	0.113447	5.76336	5.81946	7.05905	0.0563024	0.0454185	0.0348951	0.0227078	1.16853	3.44604	0.806688	0.650746	0.152948	5.41406	5.4715	7.1109	0.0633781	0.0501515	0.0400351	0.0250686	0.968442	3.26566	0.791305	0.626164	0.201805	4.2616	4.33863	5.82309	0.0479632	0.0390668	0.029474	0.0195542	0.993683	3.80293	0.814517
39	3	1	0	5.34368	5.37549	6.08334	0.0479209	0.0280005	0.0409839	0.0139926	0.60262	2.37979	0.584308	0.341416	0.127309	5.01571	5.05343	6.28076	0.0548033	0.0338027	0.0444574	0.0169135	0.917684	2.33936	0.6168	0.380442	0.154503	5.04973	5.09013	6.25269	0.0625115	0.0400446	0.0488185	0.0200333	1.01172	2.31009	0.640596	0.410363	0.169929	5.45879	5.54629	8.26521	0.0474145	0.046564	0.0241221	0.0232645	1.23079	4.54154	0.982062
39	4	1	0	5.76616	5.8318	7.49352	0.0506425	0.0442406	0.0290126	0.0221411	1.2891	3.39602	0.873588	0.763156	0.134228	6.69736	6.73763	8.19578	0.0500403	0.0368504	0.0339489	0.0184106	1.19559	2.46067	0.736413	0.542305	0.122793	7.12508	7.1678	8.64988	0.0668765	0.0523226	0.0427781	0.0261851	1.15306	3.41398	0.782377	0.612114	0.174677	5.87637	5.90073	6.99226	0.0560265	0.0300453	0.0522904	0.0150379	0.85709	1.87448	0.536269
40	1	1	0	7.18564	7.19175	7.83758	0.073763	0.0218798	0.124158	0.0109241	0.290956	1.13896	0.296623	0.0879854	0.229549	7.47222	7.49192	8.73197	0.0683198	0.037146	0.0629636	0.0186132	0.360828	2.45284	0.543707	0.295618	0.202505	6.32475	6.35947	7.62182	0.0653815	0.0434453	0.0492281	0.0217365	0.999549	2.52643	0.664489	0.441546	0.167648	6.85692	6.86864	7.55452	0.0728863	0.0292674	0.0908822	0.0146539	0.747621	1.3783	0.401548
40	2	1	0	4.84931	4.88638	6.12964	0.0668584	0.0402006	0.0556758	0.0201289	0.728051	2.5254	0.60128	0.361538	0.184822	6.03798	6.11819	7.8367	0.0766368	0.0757457	0.0387098	0.0378148	1.45482	4.04946	0.988372	0.976879	0.22129	5.49644	5.54199	6.79675	0.067315	0.0477776	0.0474856	0.0239213	1.21314	2.64338	0.709761	0.50376	0.190312	4.60777	4.68806	6.36208	0.0673941	0.0582779	0.0390032	0.0291651	1.29753	3.63243	0.864733
40	3	1	0	6.09583	6.11546	7.33806	0.0793591	0.0389027	0.080882	0.0194365	0.647922	2.02929	0.49021	0.240306	0.237369	4.96521	4.97375	5.75745	0.0430255	0.0125476	0.0739708	0.00629116	0.238878	1.27764	0.291632	0.0850493	0.0960188	5.03274	5.07317	6.09141	0.101277	0.0648039	0.0791568	0.0324095	0.921095	2.74326	0.63987	0.409434	0.293514	5.90516	5.93844	7.36404	0.0770239	0.0484087	0.061352	0.024234	1.0417	2.41856	0.628489
40	4	1	0	5.81462	5.89356	6.93486	0.0460735	0.0443359	0.0239944	0.0222187	1.53221	3.03608	0.962286	0.925994	0.124226	6.7633	6.82923	8.44805	0.0653238	0.0618986	0.0345106	0.0309865	1.45272	3.56856	0.947567	0.897883	0.18684	6.62042	6.68187	8.33431	0.0472015	0.0427145	0.0260657	0.0213456	1.55589	3.27495	0.90494	0.818917	0.130354	6.1582	6.2201	8.63641	0.0699479	0.0612855	0.0399438	0.0306631	1.13568	4.26739	0.876159
40	1	1	0	7.65139	7.68719	8.7151	0.0570433	0.0423355	0.0385299	0.0212226	1.26824	2.49836	0.742165	0.550809	0.137288	7.04325	7.0875	8.6023	0.0614346	0.0486472	0.0388592	0.024366	1.30477	2.92223	0.791854	0.627033	0.188338	6.69681	6.70563	7.21119	0.0682099	0.0234856	0.0991788	0.0117578	0.668793	1.04797	0.344314	0.118552	0.177932	6.58539	6.61793	7.64072	0.0667988	0.043841	0.0508809	0.0219168	0.976184	2.43377	0.656314
40	2	1	0	4.26583	4.3066	5.72565	0.0709337	0.042013	0.0599604	0.0210343	0.529028	2.01274	0.592286	0.350803	0.176215	5.86537	5.91653	6.95728	0.0888418	0.0691096	0.0570912	0.034547	1.4094	2.49735	0.777895	0.605121	0.239689	5.19411	5.27457	6.54418	0.0680924	0.0626153	0.0371614	0.0314235	0.924084	3.22982	0.919563	0.845597	0.177886	3.92537	4.07884	5.66529	0.0713422	0.0792231	0.0322212	0.0397332	1.48075	3.846	1.11047
40	3	1	0	5.30092	5.32023	6.03151	0.070223	0.0318385	0.0774277	0.0159163	0.599557	1.85913	0.453391	0.205564	0.217192	4.72912	4.76529	5.77549	0.0662142	0.0388467	0.0564514	0.0194303	0.874438	2.19113	0.586682	0.344196	0.193833	4.88609	4.92147	6.21161	0.0913652	0.0538775	0.0774817	0.0269434	0.866091	2.45947	0.589694	0.347739	0.305901	5.79821	5.82755	6.93522	0.0688707	0.0402662	0.0588772	0.0201261	0.921677	2.15275	0.584664
40	4	1	0	5.27888	5.36749	7.62407	0.0739425	0.0719072	0.0380331	0.0359681	1.53785	3.73083	0.972473	0.945705	0.2178	6.7286	6.78021	8.13484	0.0470691	0.0393507	0.0281932	0.019705	1.29344	2.80181	0.83602	0.698929	0.110369	5.77226	5.85319	7.49965	0.0503872	0.0489353	0.02592	0.0244477	1.80066	3.25599	0.971185	0.943199	0.129584	5.82326	5.86459	6.75985	0.040286	0.0280352	0.0289864	0.0140376	1.06162	2.48168	0.695905
40	1	1	0	7.264	7.27817	8.07387	0.0486199	0.0221069	0.0535743	0.011076	0.270314	1.66854	0.454688	0.206741	0.105593	7.19574	7.21116	7.89222	0.0835474	0.0394321	0.0885381	0.0197225	0.657648	1.8174	0.471972	0.222758	0.245014	6.25618	6.26718	7.02753	0.0678286	0.0252157	0.0913715	0.0126277	0.553023	1.47584	0.371756	0.138202	0.195306	5.99084	6.01676	7.07356	0.0689884	0.0385496	0.0618703	0.0193183	0.949177	2.01533	0.558784
40	2	1	0	5.02387	5.05933	6.23957	0.067893	0.040659	0.0568567	0.0203913	0.972476	2.16465	0.598869	0.358644	0.183562	6.33354	6.35976	7.59437	0.0819026	0.0473209	0.0707663	0.0236231	0.566115	2.42821	0.57777	0.333818	0.245446	5.10138	5.17796	6.71807	0.0772268	0.0686169	0.0434599	0.0343096	1.41224	3.24603	0.888512	0.789453	0.226627	4.38666	4.47256	6.06128	0.0814864	0.0711857	0.0466902	0.035632	1.36718	3.13396	0.873589
40	3	1	0	5.60606	5.64201	6.76774	0.0550538	0.035049	0.0432455	0.0175273	0.835193	2.49776	0.636631	0.405299	0.142079	4.33721	4.42198	5.8757	0.0466093	0.0402058	0.0270216	0.0201068	0.937922	3.52063	0.862614	0.744102	0.117526	3.96086	4.00221	4.75815	0.0680505	0.0390911	0.0591499	0.0195186	1.07445	1.75431	0.574443	0.329985	0.184661	5.6625	5.71018	7.55659	0.0728149	0.0536787	0.0494028	0.0268482	0.767813	3.41022	0.737194
40	4	1	0	4.71384	4.75951	5.5748	0.0776666	0.0511551	0.0590253	0.0256063	0.747166	3.30815	0.65865	0.43382	0.191428	6.16227	6.2148	7.80695	0.050085	0.0404426	0.0310259	0.0202295	0.853777	3.67941	0.807478	0.652021	0.0949159	5.97663	6.05799	8.23748	0.0806454	0.079911	0.0406233	0.0398868	1.73471	3.42722	0.990894	0.981871	0.237895	5.10379	5.14541	6.2475	0.0724777	0.0474035	0.0554112	0.0237034	1.16387	2.11917	0.654043
40	1	1	0	7.05514	7.08183	8.4295	0.0594765	0.0365785	0.0483422	0.0182847	0.757	2.57917	0.615008	0.378235	0.178655	6.94042	6.94707	7.61521	0.0651689	0.0198258	0.107261	0.00992714	0.410404	1.15768	0.304222	0.0925511	0.187399	6.17495	6.18599	7.09418	0.0798499	0.029537	0.108203	0.0148055	0.479757	1.60292	0.369907	0.136831	0.246767	6.573	6.61624	7.48864	0.0613826	0.0464048	0.0406303	0.0232213	0.874611	3.10132	0.755993
40	2	1	0	4.59115	4.64119	6.26354	0.0794152	0.0540486	0.0582821	0.0269958	0.747982	3.12637	0.680582	0.463192	0.231761	6.41458	6.45796	7.90685	0.052518	0.039293	0.0351442	0.0196729	0.87854	3.28535	0.748182	0.559777	0.106527	4.6182	4.6639	5.77546	0.0460199	0.0300092	0.035286	0.0150044	0.864824	2.47032	0.652091	0.425222	0.104597	3.78682	3.84518	5.04993	0.0639098	0.0427076	0.047917	0.0213976	1.08766	2.35024	0.668248
40	3	1	0	5.3196	5.43066	7.74269	0.0892279	0.0976221	0.0407728	0.0488052	1.79883	4.25645	1.09408	1.197	0.272321	4.34119	4.40053	5.30415	0.0615767	0.0444054	0.0426558	0.0221829	0.95327	2.79335	0.721141	0.520044	0.153911	4.79553	4.84958	6.33295	0.0588831	0.0425704	0.040804	0.0213273	0.902006	2.52751	0.722964	0.522677	0.148453	5.68397	5.76573	7.05334	0.0594147	0.0575611	0.0306814	0.0287969	1.08459	3.90127	0.968803
40	4	1	0	6.49898	6.54695	7.39729	0.0590645	0.0467809	0.0373113	0.0234058	0.805414	3.75708	0.79203	0.627312	0.133246	6.25791	6.3653	8.67357	0.0700831	0.0817015	0.0300976	0.0409039	1.51107	4.71712	1.16578	1.35904	0.180972	5.96184	6.01073	7.37954	0.0715585	0.0548166	0.0466978	0.0274029	1.23942	2.99296	0.766038	0.586814	0.182591	5.53328	5.58014	6.93183	0.0613566	0.044333	0.0424866	0.0221812	1.14464	2.74496	0.722547
40	1	1	0	6.80202	6.81931	7.80801	0.0833786	0.0404963	0.0860091	0.0202892	0.653907	2.34924	0.485691	0.235896	0.27694	6.9228	6.95366	8.26184	0.0841589	0.0551047	0.0643596	0.0275924	0.774704	2.92394	0.65477	0.428723	0.273722	6.04868	6.08079	7.36371	0.0550133	0.0343548	0.0440372	0.0171735	0.680712	3.14327	0.624482	0.389978	0.164612	6.19312	6.22246	7.32635	0.0552957	0.0333954	0.0458686	0.0167304	1.23001	2.02642	0.603943
40	2	1	0	4.70923	4.7514	5.77676	0.0538057	0.0340325	0.0426661	0.0170693	0.843731	2.45248	0.632508	0.400067	0.146845	6.04695	6.06836	7.1473	0.0838258	0.0427495	0.0823385	0.0214145	0.721342	1.97271	0.50998	0.260079	0.255361	5.41904	5.44997	6.37578	0.079275	0.046023	0.068238	0.0229987	0.954739	2.10949	0.580548	0.337036	0.226418	3.70373	3.75767	4.79828	0.0757836	0.0481408	0.0596574	0.0240736	0.919634	2.4557	0.635241
40	3	1	0	5.44939	5.50328	7.03065	0.0985174	0.0757639	0.0640752	0.0378956	1.05824	3.07238	0.769041	0.591424	0.315235	4.30489	4.34099	5.55294	0.0606042	0.0338909	0.0542626	0.0169693	0.736654	2.28558	0.559218	0.312725	0.158595	4.40036	4.45306	5.86136	0.0628139	0.0429487	0.0459186	0.0214673	0.846432	2.8178	0.683745	0.467507	0.18845	6.06843	6.11825	7.80064	0.086584	0.0675296	0.0555713	0.0338036	1.16333	3.13541	0.779932
40	4	1	0	5.59281	5.68407	7.51799	0.0402252	0.0408481	0.0198053	0.0204234	1.07537	4.95196	1.01548	1.03121	0.0775395	5.69111	5.80243	7.83732	0.0516711	0.058508	0.0228139	0.0292507	1.53014	4.86616	1.13232	1.28214	0.121372	6.41185	6.4757	8.03604	0.0509625	0.0462749	0.0280266	0.023108	1.24703	3.69105	0.90802	0.8245	0.128973	5.42571	5.47065	6.7189	0.0552662	0.0387149	0.0394717	0.0193697	0.892594	3.21346	0.700517
41	1	1	0	5.95214	5.99635	6.69785	0.0647811	0.0471455	0.0447542	0.0237038	1.23044	2.33065	0.727767	0.529645	0.174117	6.59516	6.62728	8.01061	0.0793781	0.0517952	0.0608935	0.0259268	0.997831	2.72854	0.652513	0.425773	0.226401	4.95999	5.00529	6.01401	0.0951084	0.063988	0.0707877	0.0320419	0.984299	2.3497	0.672791	0.452648	0.28943	5.61275	5.64387	6.56698	0.0496135	0.0294022	0.0420244	0.0147592	1.04148	1.74478	0.592626
41	2	1	0	5.93513	6.03409	7.52264	0.0616008	0.0671203	0.0282558	0.0335462	2.03603	3.69505	1.0896	1.18723	0.170856	6.0832	6.15238	8.04422	0.0634605	0.0584544	0.0344771	0.0292522	1.31063	3.57114	0.921115	0.848454	0.180407	5.32007	5.37785	7.16148	0.0620081	0.048808	0.0394103	0.0244173	0.79089	3.2282	0.787124	0.619565	0.168261	4.5937	4.66371	6.09338	0.0630421	0.0508086	0.0391882	0.0254547	1.01161	3.20702	0.805947
41	3	1	0	5.25351	5.36598	8.45753	0.0632076	0.069147	0.0289154	0.0346049	1.04444	4.73591	1.09397	1.19676	0.180514	5.23913	5.38491	8.48066	0.075374	0.093896	0.0302578	0.0469556	1.36215	5.52206	1.24573	1.55185	0.21802	5.92541	5.98338	7.5365	0.0537801	0.0447294	0.0323166	0.0223547	1.18695	3.09163	0.831709	0.691739	0.151495	5.09222	5.1545	6.30986	0.0527231	0.0421612	0.0330222	0.0211169	0.997428	3.31149	0.799673
41	4	1	0	6.10378	6.13791	7.15111	0.0513322	0.033224	0.0398335	0.0166868	0.982538	2.81606	0.647235	0.418913	0.12359	6.70098	6.73787	7.98338	0.076097	0.0536476	0.0540452	0.0268611	1.05142	2.97885	0.70499	0.497011	0.195351	6.74809	6.79924	8.81284	0.0530866	0.0442497	0.0317986	0.0220933	1.22077	3.71547	0.833539	0.694788	0.120231	6.24185	6.27156	7.17317	0.0597756	0.0364955	0.0490681	0.0182907	1.07724	1.92951	0.610542
41	1	1	0	5.67678	5.69516	6.62425	0.050559	0.0231439	0.0552524	0.0115778	0.681529	1.76632	0.45776	0.209545	0.127748	6.15076	6.16007	6.70776	0.0857153	0.0290429	0.126942	0.0145737	0.508892	1.92917	0.33883	0.114806	0.239887	5.8718	5.88527	6.62591	0.0539533	0.0214944	0.0679654	0.010787	0.381049	1.68542	0.398388	0.158713	0.14764	5.53872	5.58302	6.95519	0.0615297	0.0432426	0.0437527	0.0216103	0.934322	2.38903	0.702793
41	2	1	0	4.73588	4.79481	6.30485	0.0849705	0.063761	0.056638	0.0318921	0.744733	3.24343	0.75039	0.563085	0.252305	5.61351	5.68514	7.25986	0.0821997	0.074038	0.0456376	0.0370247	1.42337	3.1338	0.900709	0.811276	0.244618	5.59695	5.62158	7.01203	0.0709055	0.0373163	0.0672747	0.0186333	0.656463	2.40872	0.526282	0.276973	0.189986	3.74241	3.86816	5.91909	0.0710023	0.0695462	0.0362906	0.0348174	1.44966	3.68928	0.979492
41	3	1	0	4.87758	4.90562	6.21621	0.091311	0.0478821	0.0871056	0.0239522	0.681631	2.1039	0.524385	0.274979	0.273736	5.09057	5.15561	6.42678	0.0392412	0.0320755	0.0239929	0.0160304	1.48045	2.65148	0.817393	0.668132	0.0912269	5.20194	5.31354	7.1824	0.0619983	0.0672471	0.0285332	0.0335689	1.37173	4.02705	1.08466	1.17649	0.17133	5.12942	5.19344	7.37425	0.0977824	0.0795918	0.0601216	0.0398332	0.884064	3.87261	0.813969
41	4	1	0	6.13908	6.2598	8.87948	0.0602746	0.0738258	0.0246475	0.0369761	1.7188	6.08443	1.22482	1.50019	0.148953	7.46006	7.51086	9.22121	0.0682812	0.0596194	0.0391639	0.0298578	1.13679	3.97245	0.873145	0.762383	0.190126	7.33335	7.39379	8.91906	0.0679747	0.0642023	0.0359838	0.0321007	1.55447	3.90402	0.944503	0.892087	0.191724	6.20322	6.23351	7.49761	0.0812101	0.0498995	0.066222	0.025002	0.849888	2.89186	0.614449
41	1	1	0	6.18315	6.21154	7.36326	0.0569635	0.033822	0.0480931	0.0169546	0.708513	2.23588	0.593748	0.352537	0.1538	6.52717	6.5397	7.28947	0.0713057	0.0288759	0.0883029	0.014481	0.600435	1.97342	0.404959	0.163992	0.181735	5.94574	5.96757	7.17461	0.0668842	0.0341393	0.0656139	0.0170945	0.740234	2.1513	0.510423	0.260532	0.182997	5.41028	5.45156	7.44984	0.0837938	0.0561549	0.0626832	0.0281516	0.786996	2.96526	0.670156
41	2	1	0	4.66522	4.70863	6.30438	0.0800828	0.0511407	0.0626675	0.0255562	0.900361	2.58583	0.638597	0.407807	0.238112	6.5727	6.6154	8.29626	0.0954592	0.0717212	0.0636363	0.0359223	1.10616	3.12733	0.751328	0.564494	0.296677	3.34191	3.40826	4.64668	0.0837107	0.0560891	0.062622	0.028114	1.13722	2.47716	0.670035	0.448947	0.26011	3.80103	3.91993	5.95576	0.0657444	0.0630661	0.0344244	0.0316768	1.26977	3.78511	0.959262
41	3	1	0	5.275	5.29039	6.1313	0.0694994	0.0280533	0.086265	0.0140553	0.645427	1.66863	0.403648	0.162932	0.208494	4.59408	4.62671	5.92408	0.0827915	0.0454526	0.0756121	0.0227896	0.650682	2.56234	0.549	0.301401	0.26862	5.17971	5.20844	6.53756	0.0832363	0.0455116	0.0761669	0.0227711	0.768409	2.34267	0.546776	0.298964	0.267098	4.88866	4.95466	6.42212	0.0783633	0.0632155	0.0486458	0.0316568	1.03784	3.60675	0.806697
41	4	1	0	6.10834	6.21454	8.58306	0.048009	0.0549809	0.0209637	0.0274946	1.5602	4.18236	1.14522	1.31153	0.123534	7.81476	7.84115	8.77501	0.0618179	0.0397782	0.048138	0.019932	0.601549	2.81599	0.643475	0.41406	0.157988	7.08254	7.15054	8.68806	0.0464707	0.0457676	0.0235783	0.0228702	1.81147	3.09584	0.98487	0.969969	0.122326	6.30825	6.33898	7.61564	0.0537299	0.0335327	0.0430572	0.0167707	0.994378	2.28307	0.624098
41	1	1	0	6.00851	6.02287	6.88152	0.0757822	0.0315379	0.0911508	0.0157867	0.661972	1.44887	0.416165	0.173194	0.228597	6.13092	6.148	6.91026	0.0917582	0.0420734	0.100308	0.0210892	0.787587	1.59486	0.458525	0.210245	0.271047	5.85639	5.89657	7.6283	0.0637458	0.0438539	0.0464332	0.0219756	0.867476	3.09658	0.687949	0.473274	0.185706	5.15347	5.17414	6.48983	0.0947136	0.0438114	0.102635	0.0219606	0.585004	2.28191	0.462567
41	2	1	0	4.22751	4.26845	5.38967	0.059729	0.0352587	0.0505755	0.0176239	1.02493	2.20046	0.590312	0.348468	0.154833	5.8072	5.83875	7.17302	0.0794251	0.0481957	0.0654536	0.024101	1.02394	2.1941	0.606807	0.368215	0.249509	4.26836	4.32439	5.60509	0.0657658	0.0456802	0.0474049	0.0228706	1.23408	2.52512	0.694588	0.482453	0.200211	3.4316	3.49257	4.28685	0.0373595	0.0242976	0.0287015	0.0121403	1.1932	2.0589	0.650373
41	3	1	0	5.50714	5.54699	7.05089	0.0761252	0.0505683	0.0572659	0.0252695	0.923473	2.74439	0.664279	0.441266	0.233919	4.85216	4.90719	6.11272	0.0671319	0.0492395	0.0457428	0.0246089	0.705332	3.53212	0.733474	0.537984	0.198051	5.13983	5.17157	6.44135	0.0584462	0.0334679	0.0510735	0.0167471	0.779266	2.26882	0.572628	0.327902	0.159096	4.70649	4.75087	6.21735	0.0811529	0.0526235	0.0626431	0.0263406	0.853696	2.73285	0.648449
41	4	1	0	6.73302	6.78335	8.29821	0.0760517	0.0627997	0.0460384	0.031392	1.19966	3.32392	0.825751	0.681864	0.238458	7.2882	7.32474	8.32194	0.0705886	0.0516392	0.0483708	0.0258865	0.851648	3.60078	0.731552	0.535168	0.171099	6.79521	6.83009	7.66506	0.0768385	0.0530346	0.0557471	0.0265573	1.2119	2.34307	0.690209	0.476389	0.212301	6.54364	6.61683	8.35047	0.0592738	0.0582422	0.0301695	0.0291285	1.34754	3.91963	0.982596
41	1	1	0	6.45222	6.47534	7.64175	0.0590495	0.0323114	0.0541172	0.0162037	0.483987	2.846	0.547192	0.299419	0.164332	5.98223	6.00809	7.0149	0.0711777	0.0396667	0.0639945	0.019875	0.817487	2.07965	0.557291	0.310574	0.224158	6.18394	6.21072	7.2365	0.0668917	0.0385673	0.0580331	0.0192916	0.963724	2.15308	0.576563	0.332425	0.204448	5.63435	5.69482	6.84792	0.0515261	0.0426816	0.0310827	0.0213278	1.3755	2.9884	0.82835
41	2	1	0	4.23405	4.30108	6.3233	0.0740143	0.0560357	0.0489157	0.028038	1.08781	3.4879	0.757093	0.573189	0.212177	5.84808	5.90785	7.19637	0.0530189	0.0444828	0.0315809	0.0222304	1.29036	3.39832	0.838999	0.70392	0.15058	4.2093	4.31902	6.59099	0.0695834	0.0673748	0.0359918	0.0337433	1.19043	3.97353	0.968259	0.937526	0.1875	3.91272	3.98391	5.91496	0.071399	0.053584	0.0475908	0.0268046	1.15986	3.11099	0.750487
41	3	1	0	5.80078	5.87915	8.75741	0.0549902	0.0526566	0.0287124	0.0263273	0.686216	4.61544	0.957564	0.916929	0.149337	4.84198	4.92861	7.23137	0.0667657	0.0614785	0.0363138	0.0307901	1.03971	3.9327	0.92081	0.847891	0.187907	5.69664	5.74815	7.21763	0.0781346	0.0600475	0.0508034	0.0300051	1.11814	2.9452	0.768513	0.590613	0.25268	5.64363	5.7073	7.27374	0.0707756	0.0602203	0.041664	0.0301633	1.12443	3.96801	0.850862
41	4	1	0	6.52846	6.62075	9.13937	0.0467073	0.0515101	0.0212159	0.0258034	1.12599	4.5858	1.10283	1.21623	0.112331	7.96045	8.01211	9.53193	0.0700797	0.0637334	0.0385367	0.0318731	1.45255	4.02138	0.909442	0.827084	0.190649	7.51941	7.57762	9.05956	0.0754591	0.0708166	0.0402372	0.0354385	1.2323	4.27572	0.938476	0.880738	0.204225	7.08423	7.11581	8.13105	0.0699642	0.0468991	0.0523229	0.0235109	0.783175	2.71965	0.670331
42	1	0	0	5.68773	5.72499	6.7089	0.06378	0.041643	0.0489387	0.0208625	0.902575	2.38171	0.652916	0.426299	0.177996	5.92025	5.95604	7.2055	0.0665109	0.0434103	0.0510511	0.0217472	1.03416	2.3693	0.652679	0.42599	0.193323	5.70894	5.74284	6.90494	0.0576994	0.035994	0.0463303	0.0180294	0.806265	2.33117	0.623819	0.38915	0.160991	5.32552	5.36118	6.26254	0.0728702	0.0450338	0.0589549	0.0225163	1.08526	2.07403	0.618
42	2	0	0	3.67006	3.7768	5.86361	0.0555672	0.0495878	0.0311391	0.0247982	1.1235	4.0305	0.892394	0.796368	0.150973	5.64504	5.69403	7.21716	0.0951932	0.0710166	0.0638448	0.0355332	1.2435	2.98268	0.746026	0.556555	0.296695	5.46034	5.50903	6.66096	0.0683415	0.0499959	0.0466951	0.0249903	1.00117	2.93369	0.731561	0.535181	0.202862	3.10369	3.18819	4.71382	0.0680788	0.049688	0.0467008	0.0248773	1.04752	2.68655	0.72986
42	3	0	0	5.21141	5.28351	7.07646	0.0716698	0.0623948	0.0412492	0.0312637	1.29083	3.53719	0.870587	0.757922	0.218306	4.46753	4.5165	5.89845	0.0830037	0.0551001	0.0625411	0.0275598	0.858759	2.73774	0.663827	0.440666	0.268316	4.5981	4.66185	6.17479	0.090629	0.0696848	0.0589092	0.0348277	1.09655	3.09234	0.768902	0.59121	0.291354	4.77251	4.84854	7.03883	0.0817452	0.0699676	0.0477212	0.0349608	1.05046	4.252	0.855924
42	4	0	0	6.35134	6.42189	9.25065	0.0602497	0.0572683	0.0316837	0.0286255	1.54711	4.29971	0.950515	0.90348	0.145107	7.56909	7.60399	9.06949	0.0774191	0.0564128	0.0532998	0.0282999	1.30174	2.6103	0.728668	0.530957	0.239986	6.51707	6.55791	7.98884	0.0682089	0.0499047	0.0466616	0.0249782	1.16708	3.46268	0.731645	0.535305	0.178889	6.62558	6.64745	7.58148	0.0982247	0.0529902	0.0912205	0.0265487	0.757162	2.14978	0.53948
42	1	0	0	5.56597	5.58363	6.53711	0.0818462	0.0363669	0.0921781	0.0181988	0.78959	1.7284	0.444332	0.197431	0.219477	6.085	6.11091	6.95659	0.0764448	0.0430333	0.067814	0.0214898	0.827096	2.07001	0.562933	0.316893	0.213076	5.78854	5.84954	6.94833	0.103991	0.0877414	0.0615265	0.0438008	1.13402	3.06584	0.843742	0.7119	0.317315	4.92654	4.9683	6.0125	0.0568264	0.0365752	0.0441432	0.0182867	1.19934	2.16049	0.643629
42	2	0	0	3.44592	3.4984	4.7895	0.070636	0.0426876	0.0586092	0.0214051	0.794405	2.47122	0.604332	0.365218	0.209251	6.57772	6.62395	8.21122	0.0708396	0.0554064	0.0453936	0.0277691	1.23905	2.73845	0.782139	0.611741	0.209665	5.04069	5.08903	6.35849	0.118817	0.0832449	0.0847916	0.0416207	1.07329	2.88777	0.700613	0.490858	0.357949	3.8556	4.05081	6.67609	0.0992063	0.123388	0.039856	0.0616537	1.8589	4.89944	1.24375
42	3	0	0	5.71943	5.77505	7.52128	0.101141	0.0809546	0.0632671	0.040533	1.08132	3.26473	0.800416	0.640666	0.329314	4.88933	4.96225	6.16359	0.0796064	0.0675414	0.0469152	0.0337721	1.30019	3.37151	0.848442	0.719853	0.25646	5.62856	5.68248	7.02686	0.0918136	0.0717797	0.0589348	0.0360214	1.01177	3.25147	0.781798	0.611209	0.297003	4.9777	4.99169	5.62516	0.0763468	0.0285381	0.102425	0.0143112	0.491607	1.45478	0.373796
42	4	0	0	5.83232	5.91533	7.55489	0.0588524	0.0581785	0.0297992	0.0291206	1.56728	4.17057	0.988548	0.977228	0.140646	7.69446	7.78517	10.1286	0.0662431	0.0785778	0.0279064	0.0392664	1.58968	4.89407	1.1862	1.40708	0.196695	6.71199	6.76474	8.62983	0.0641525	0.0541473	0.0380791	0.0271277	1.2103	3.01404	0.844041	0.712405	0.189578	6.9221	6.97792	8.7681	0.0744821	0.0656766	0.042201	0.0328126	1.25075	3.72505	0.881778
42	1	0	0	5.39645	5.44319	6.62896	0.082593	0.0588493	0.0580626	0.0294776	1.17013	2.83983	0.712522	0.507687	0.259869	5.83256	5.85632	7.03208	0.0648325	0.0342077	0.0614624	0.0171108	0.677039	2.34483	0.527632	0.278395	0.188171	5.69423	5.75993	7.40749	0.0937724	0.0814319	0.0540273	0.0407429	1.01863	3.8437	0.868399	0.754117	0.286828	4.50517	4.61693	6.93483	0.0657102	0.0664165	0.0325821	0.0332864	1.14952	4.24559	1.01075
42	2	0	0	3.3843	3.4792	5.31004	0.0810446	0.0654672	0.0502413	0.0327839	0.840577	3.77578	0.807793	0.652529	0.266905	6.13199	6.1736	7.48959	0.0667872	0.0478348	0.0467171	0.023965	1.14862	2.8427	0.716227	0.512981	0.202035	4.58897	4.64048	5.87973	0.0922546	0.0636649	0.0668765	0.0318492	1.05513	2.8404	0.690101	0.476239	0.292159	3.14362	3.28251	5.9678	0.0800457	0.0756908	0.0423821	0.0378959	1.17371	4.322	0.945595
42	3	0	0	5.01162	5.05624	6.24335	0.0825653	0.0553856	0.0617289	0.0277771	1.13821	2.51648	0.67081	0.449985	0.255191	4.24198	4.32003	5.96809	0.0553174	0.0452555	0.0338869	0.0226804	1.36558	3.26377	0.818106	0.669297	0.153	5.16838	5.24177	6.96097	0.0989112	0.086522	0.0565163	0.0432451	1.0992	4.05135	0.874745	0.765179	0.325049	4.9596	5.05605	7.47409	0.0722654	0.0710802	0.0367483	0.0355529	1.46846	4.23915	0.9836
42	4	0	0	6.59155	6.68318	9.54413	0.0732691	0.0809066	0.0332074	0.0404912	1.1594	5.01334	1.10424	1.21935	0.204781	8.00879	8.11972	10.6277	0.0502724	0.0673256	0.0187707	0.0336652	2.16903	5.04355	1.33922	1.7935	0.129699	7.64709	7.69936	9.75013	0.0997353	0.0894376	0.0557281	0.0448143	1.36682	3.7556	0.896749	0.804159	0.301934	7.45005	7.52013	9.17621	0.0632397	0.0648567	0.0307982	0.0323933	1.39796	3.72975	1.02557
42	1	0	0	5.33513	5.37112	6.77436	0.0614651	0.0381937	0.0494068	0.0190772	0.796362	2.57216	0.621389	0.386125	0.185746	5.58645	5.63573	7.52192	0.0743785	0.0553704	0.0499738	0.0276951	0.571392	3.16242	0.744442	0.554193	0.206715	5.24435	5.293	7.14845	0.0962204	0.0689592	0.0672494	0.0345412	0.922264	3.43506	0.716679	0.513629	0.307293	4.52945	4.56402	5.48894	0.117945	0.0662018	0.105486	0.0332337	0.817001	2.22317	0.561296
42	2	0	0	3.55793	3.65482	5.53791	0.0715938	0.0599541	0.0427229	0.0299604	1.16049	3.18449	0.837421	0.701273	0.166916	6.59209	6.63657	7.75923	0.0787283	0.0604983	0.0514389	0.030375	0.976746	2.89492	0.768445	0.590507	0.203415	5.2983	5.33826	6.58859	0.0981001	0.0640712	0.0751022	0.0320361	1.02815	2.45112	0.653121	0.426567	0.300587	2.88583	3.27747	6.64183	0.0856931	0.13337	0.0275296	0.066684	1.83284	6.09826	1.55636
42	3	0	0	5.34602	5.39974	6.65244	0.083208	0.0632791	0.0546951	0.0316329	1.18239	3.013	0.760493	0.57835	0.26422	5.28494	5.41231	8.09938	0.0691682	0.0808183	0.029619	0.0404368	1.68098	5.11618	1.16843	1.36523	0.20946	5.04971	5.14985	7.23869	0.0987058	0.099857	0.0488293	0.049975	1.62438	3.90759	1.01166	1.02346	0.307318	5.17346	5.20298	6.33679	0.0743547	0.0411967	0.06702	0.0205737	0.713537	2.34817	0.554057
42	4	0	0	6.12852	6.20777	8.5902	0.0766583	0.0759192	0.0387402	0.0379967	0.849314	4.03483	0.990358	0.980809	0.207466	7.47315	7.50369	8.89804	0.0787512	0.0533435	0.0580561	0.0266377	0.956418	2.95792	0.677368	0.458827	0.21148	7.70525	7.73155	8.56362	0.080914	0.0516352	0.0635186	0.025867	1.1195	2.08287	0.638149	0.407235	0.225772	6.60691	6.68562	8.79872	0.0786512	0.0805788	0.0385169	0.0404281	1.57538	3.59524	1.02451
42	1	0	0	5.33872	5.36712	6.55341	0.102685	0.0566795	0.0929668	0.028325	0.710463	2.35079	0.551977	0.304678	0.332302	5.87244	5.9448	8.07681	0.0811614	0.0751238	0.0438205	0.0375434	1.30524	4.03117	0.92561	0.856754	0.249647	5.31225	5.37923	7.36799	0.0715602	0.060621	0.0422599	0.0303272	0.911951	3.57497	0.847134	0.717636	0.206942	5.0883	5.12291	6.2793	0.0782286	0.0465561	0.0657729	0.0232953	1.06471	2.06235	0.595128
42	2	0	0	3.23095	3.28811	4.35064	0.0695154	0.0424784	0.056913	0.0212514	0.851822	2.69789	0.611065	0.373401	0.184568	5.84827	5.91298	7.53889	0.0790503	0.069038	0.0452314	0.0344992	1.14484	3.27434	0.873342	0.762727	0.240262	5.06951	5.13681	7.12409	0.0956231	0.0793386	0.0576804	0.0397074	1.18873	3.43155	0.829701	0.688404	0.288464	3.21755	3.32211	4.73546	0.0873001	0.0722654	0.0528016	0.0361808	1.35047	3.08714	0.827781
42	3	0	0	5.17763	5.20831	6.28019	0.0893824	0.050496	0.079097	0.0252446	0.814507	2.34962	0.564943	0.319161	0.297953	4.87586	4.95719	6.58557	0.0788982	0.070617	0.0440783	0.035311	1.36122	3.79115	0.89504	0.801097	0.237917	5.33009	5.3786	7.22658	0.0816433	0.0588967	0.0565297	0.0294183	1.11105	3.26351	0.721391	0.520404	0.256933	4.6699	4.7549	6.52512	0.0794822	0.0711981	0.0443151	0.0355589	1.20157	4.13644	0.895774
42	4	0	0	6.7994	6.89416	8.31239	0.0403875	0.0460383	0.0177213	0.0230271	1.88786	3.89787	1.13991	1.2994	0.100861	7.65617	7.76259	9.80388	0.0439511	0.0563418	0.017144	0.0281732	2.11372	4.81582	1.28192	1.64332	0.121543	7.37669	7.40437	8.83356	0.0846358	0.054179	0.0660541	0.0270678	0.803998	2.94059	0.640143	0.409783	0.270071	7.04621	7.12724	9.41571	0.065957	0.0707363	0.0307861	0.0354094	1.17017	4.26819	1.07246
[truncated: 362 more columns]
